# Supplementary material for: The circRNA expression profile of colorectal inflammatory cancer transformation revealed potential predictive biomarkers
Source: Aging (Albany NY). 2022 Nov 29;14(22):9280–99. doi: 10.18632/aging.204406 (PMC9740358; doi:10.18632/aging.204406)
Supplement: Additional File 1 [file aging-14-204406-s001.xlsx]

## Sheet: circRNA Expression Profiling
Additional File 1. circRNA expression profiling.
circRNAs identified by DCC Column A: CircRNAID, the ID of the identified circRNA by DCC. Column B ~ AO: junction reads, the junction read number of each sample. Column AP ~ CC: logCPM by edgeR. Column CD ~ CG: the coordinates of circRNA. Column CH: circBaseID, the identifier of circBase (http://www.circbase.org). Column CI: source, the source of the circRNA, including circBase, Guojunjie2014,... …
	junction reads																																								logCPM by edgeR
CircRNAID	0-1	0-2	0-3	0-4	0-5	3-1	3-2	3-3	3-4	3-5	6-1	6-2	6-3	6-4	6-5	M1	M2	M3	M4	M5	N1	N2	N3	N4	N5	H1	H2	H3	H4	H5	W1	W2	W3	W4	W5	Q1	Q2	Q3	Q4	Q5	0-1	0-2	0-3	0-4	0-5	3-1	3-2	3-3	3-4
chr1:4828584-4841132+	0	0	0	0	1	0	0	0	0	0	0	0	0	0	0	0	0	0	0	0	3	0	0	0	0	0	0	0	0	0	0	0	0	0	0	0	0	0	0	0	8.92316	8.92316	8.92316	8.92316	9.48822	8.92316	8.92316	8.92316	8.92316
chr1:5089009-5098133+	0	0	1	1	2	1	0	1	1	2	1	0	2	3	0	0	0	1	2	1	1	1	2	1	3	1	0	0	0	1	0	0	2	0	1	2	0	0	1	0	8.92316	8.92316	9.48818	9.48344	9.89321	9.5523	8.92316	9.53126	9.49515
chr1:5089009-5101123+	0	3	1	1	1	0	1	0	0	0	2	3	3	4	0	0	1	0	0	1	0	0	0	0	0	0	0	0	1	2	2	1	3	0	0	0	0	0	0	0	8.92316	10.191	9.48818	9.48344	9.48822	8.92316	9.49805	8.92316	8.92316
chr1:5089009-5124469+	0	0	1	0	3	0	0	0	0	0	1	0	0	0	0	0	0	0	0	0	0	0	0	0	0	0	0	0	0	2	0	0	0	0	0	0	0	1	0	0	8.92316	8.92316	9.48818	8.92316	10.2091	8.92316	8.92316	8.92316	8.92316
chr1:5089009-5135937+	0	0	0	0	0	0	0	0	0	0	0	0	0	0	0	0	0	0	0	0	0	0	0	0	0	0	0	0	0	0	0	0	0	0	0	3	0	0	0	0	8.92316	8.92316	8.92316	8.92316	8.92316	8.92316	8.92316	8.92316	8.92316
chr1:5095615-5101123+	0	0	0	0	0	0	0	0	0	0	0	0	0	0	0	0	0	0	0	0	0	0	0	0	0	0	0	0	0	2	0	0	0	0	1	0	0	4	0	0	8.92316	8.92316	8.92316	8.92316	8.92316	8.92316	8.92316	8.92316	8.92316
chr1:5095615-5124469+	0	0	0	0	1	2	0	1	0	0	0	0	2	0	0	0	0	0	0	0	0	0	0	0	0	0	1	1	0	0	0	0	0	0	0	0	0	3	0	0	8.92316	8.92316	8.92316	8.92316	9.48822	9.98893	8.92316	9.53126	8.92316
chr1:5133084-5150061+	0	2	0	0	0	0	0	0	0	0	0	0	0	0	0	0	0	0	0	0	0	0	0	0	0	0	0	0	0	0	0	0	0	0	0	0	0	0	0	0	8.92316	9.87826	8.92316	8.92316	8.92316	8.92316	8.92316	8.92316	8.92316
chr1:6227940-6250167+	0	0	0	0	0	0	0	0	0	0	1	0	0	0	0	0	0	0	0	0	0	0	0	0	0	0	0	0	0	0	2	0	1	0	0	0	0	0	0	0	8.92316	8.92316	8.92316	8.92316	8.92316	8.92316	8.92316	8.92316	8.92316
chr1:6233961-6250167+	0	0	0	0	0	0	0	0	0	0	2	0	0	0	0	0	0	0	0	0	0	0	0	0	0	0	0	0	0	0	0	0	0	0	0	0	0	0	0	0	8.92316	8.92316	8.92316	8.92316	8.92316	8.92316	8.92316	8.92316	8.92316
chr1:6260930-6272771+	0	0	0	0	0	0	0	0	3	0	0	0	0	0	0	0	0	0	0	0	0	0	0	0	0	0	0	0	0	0	0	0	0	0	0	0	0	0	0	0	8.92316	8.92316	8.92316	8.92316	8.92316	8.92316	8.92316	8.92316	10.2217
chr1:6514624-6565880+	0	0	0	0	0	0	0	0	0	0	0	0	0	0	0	0	0	0	0	0	0	0	0	0	0	0	0	0	0	0	0	0	0	0	0	0	0	2	0	0	8.92316	8.92316	8.92316	8.92316	8.92316	8.92316	8.92316	8.92316	8.92316
chr1:6752296-6770974+	0	0	0	0	0	0	0	0	0	0	0	0	0	0	0	0	0	0	0	0	2	0	0	0	0	0	0	0	0	0	0	0	0	0	0	0	0	0	0	0	8.92316	8.92316	8.92316	8.92316	8.92316	8.92316	8.92316	8.92316	8.92316
chr1:7120194-7120615+	2	1	0	2	0	0	0	1	0	0	3	0	0	0	1	0	1	1	0	0	4	5	3	0	3	0	0	0	0	3	3	0	1	1	1	0	0	1	0	1	9.7694	9.47834	8.92316	9.88598	8.92316	8.92316	8.92316	9.53126	8.92316
chr1:7120194-7147739+	1	0	0	0	0	3	0	0	1	2	0	0	0	0	0	0	0	0	1	0	1	2	1	1	1	2	0	0	1	0	0	0	0	0	0	3	0	1	0	0	9.40746	8.92316	8.92316	8.92316	8.92316	10.3237	8.92316	8.92316	9.49515
chr1:7387987-7388228-	0	0	0	0	0	0	0	0	0	0	0	0	0	0	0	0	0	0	0	0	0	2	0	0	0	0	0	0	0	0	0	0	0	0	0	0	0	0	0	0	8.92316	8.92316	8.92316	8.92316	8.92316	8.92316	8.92316	8.92316	8.92316
chr1:8414203-8448132-	2	0	0	0	0	0	0	0	0	0	0	0	0	0	0	0	0	0	0	0	0	0	0	0	0	0	0	0	0	0	0	0	0	0	0	0	0	0	0	0	9.7694	8.92316	8.92316	8.92316	8.92316	8.92316	8.92316	8.92316	8.92316
chr1:10034008-10035163-	0	0	0	0	0	0	0	0	1	0	0	0	0	0	0	0	0	0	0	0	0	0	0	0	0	0	0	0	0	0	1	1	2	0	0	0	0	0	0	0	8.92316	8.92316	8.92316	8.92316	8.92316	8.92316	8.92316	8.92316	9.49515
chr1:10061867-10062103+	0	0	0	2	0	0	0	0	0	0	0	0	0	0	0	0	0	0	0	0	0	0	0	0	0	0	0	0	0	0	0	0	0	0	0	0	0	0	0	0	8.92316	8.92316	8.92316	9.88598	8.92316	8.92316	8.92316	8.92316	8.92316
chr1:10064333-10083558+	0	0	0	0	0	0	0	0	0	0	0	0	0	0	0	0	0	2	0	0	0	0	0	0	0	0	0	0	0	0	0	0	0	0	0	0	0	0	0	0	8.92316	8.92316	8.92316	8.92316	8.92316	8.92316	8.92316	8.92316	8.92316
chr1:10082253-10090317+	0	0	0	0	0	0	0	0	0	0	0	1	0	0	0	1	0	0	0	0	0	0	0	0	0	0	0	0	2	0	0	0	0	0	0	0	0	0	0	0	8.92316	8.92316	8.92316	8.92316	8.92316	8.92316	8.92316	8.92316	8.92316
chr1:10082253-10096013+	0	1	0	1	0	1	0	0	0	2	0	0	0	0	0	0	2	1	0	0	2	1	1	1	1	0	0	0	0	0	0	0	0	0	0	0	3	1	0	0	8.92316	9.47834	8.92316	9.48344	8.92316	9.5523	8.92316	8.92316	8.92316
chr1:10144718-10163787-	0	0	0	0	0	0	0	0	0	0	0	2	0	0	0	0	0	0	0	0	0	0	0	0	0	0	0	0	0	0	0	0	0	0	0	0	0	0	0	0	8.92316	8.92316	8.92316	8.92316	8.92316	8.92316	8.92316	8.92316	8.92316
chr1:10172834-10216559-	1	0	0	2	0	0	0	0	0	0	0	0	0	0	0	0	0	0	0	0	0	0	0	0	0	0	0	0	0	0	0	0	0	0	0	0	0	0	0	0	9.40746	8.92316	8.92316	9.88598	8.92316	8.92316	8.92316	8.92316	8.92316
chr1:10179826-10216559-	0	0	0	0	2	0	0	0	1	0	0	0	0	0	0	0	0	0	0	0	0	1	0	0	0	0	0	0	0	0	0	0	0	0	0	0	0	0	0	0	8.92316	8.92316	8.92316	8.92316	9.89321	8.92316	8.92316	8.92316	9.49515
chr1:10183663-10189678-	0	0	0	0	0	0	0	0	0	0	0	0	0	0	0	0	0	0	0	0	0	0	0	0	0	0	0	0	0	0	0	0	0	0	0	0	0	0	3	0	8.92316	8.92316	8.92316	8.92316	8.92316	8.92316	8.92316	8.92316	8.92316
chr1:10188757-10189678-	0	0	0	0	1	0	0	2	0	0	0	0	0	0	0	0	0	1	0	0	3	0	0	0	0	2	0	0	1	0	0	0	0	1	0	0	0	1	0	0	8.92316	8.92316	8.92316	8.92316	9.48822	8.92316	8.92316	9.95773	8.92316
chr1:10194257-10213223-	0	0	0	0	0	0	0	0	0	0	0	0	0	0	0	0	0	0	0	0	0	0	0	0	0	0	0	0	0	0	0	0	0	0	0	2	0	0	0	0	8.92316	8.92316	8.92316	8.92316	8.92316	8.92316	8.92316	8.92316	8.92316
chr1:10209425-10216559-	0	0	0	1	0	0	0	0	0	0	0	0	0	0	0	0	2	0	0	0	0	0	0	1	0	0	0	0	0	0	2	0	0	0	1	0	0	0	0	0	8.92316	8.92316	8.92316	9.48344	8.92316	8.92316	8.92316	8.92316	8.92316
chr1:10209643-10214239-	0	0	0	0	0	0	0	0	0	0	0	0	0	0	0	0	0	0	0	0	2	0	0	0	0	0	0	0	0	0	0	0	0	0	0	0	0	0	0	0	8.92316	8.92316	8.92316	8.92316	8.92316	8.92316	8.92316	8.92316	8.92316
chr1:10440189-10484063-	0	0	0	0	0	0	0	0	0	0	0	0	1	0	0	0	0	0	0	0	0	0	0	2	0	0	0	0	0	0	0	0	0	0	0	0	0	0	0	0	8.92316	8.92316	8.92316	8.92316	8.92316	8.92316	8.92316	8.92316	8.92316
chr1:10477025-10484063-	2	2	0	0	0	0	0	0	0	0	0	0	0	0	0	0	0	0	0	0	0	0	0	0	0	0	0	0	0	0	0	0	0	0	0	0	0	0	0	0	9.7694	9.87826	8.92316	8.92316	8.92316	8.92316	8.92316	8.92316	8.92316
chr1:10477025-10488968-	0	1	0	0	0	0	0	0	0	0	0	0	0	1	0	0	0	0	0	0	0	0	0	0	0	0	0	0	0	0	0	0	0	0	0	2	0	0	0	0	8.92316	9.47834	8.92316	8.92316	8.92316	8.92316	8.92316	8.92316	8.92316
chr1:11098463-11123863+	0	0	0	0	0	0	0	0	0	0	0	0	0	0	0	0	0	0	0	0	0	0	0	0	0	0	0	0	0	0	0	0	0	0	0	2	0	0	0	0	8.92316	8.92316	8.92316	8.92316	8.92316	8.92316	8.92316	8.92316	8.92316
chr1:11132338-11142797+	0	0	0	0	0	0	0	0	0	0	0	0	0	0	0	0	0	0	0	0	0	0	0	0	0	0	0	0	0	0	0	0	0	0	0	3	0	0	0	0	8.92316	8.92316	8.92316	8.92316	8.92316	8.92316	8.92316	8.92316	8.92316
chr1:11169853-11182034+	0	0	0	0	0	0	0	0	0	0	0	0	0	0	0	0	0	0	0	0	0	0	0	0	0	0	0	0	0	0	0	0	0	2	0	0	0	0	0	0	8.92316	8.92316	8.92316	8.92316	8.92316	8.92316	8.92316	8.92316	8.92316
chr1:11181855-11208655+	1	0	0	0	0	0	0	0	0	0	0	0	0	0	0	0	0	0	0	1	0	1	0	0	0	0	2	0	0	0	0	0	2	0	0	0	0	0	0	0	9.40746	8.92316	8.92316	8.92316	8.92316	8.92316	8.92316	8.92316	8.92316
chr1:12728594-12797005+	0	0	0	0	0	0	3	0	0	0	0	0	0	0	0	0	0	0	0	0	0	0	0	0	0	0	0	0	0	0	0	0	0	0	0	0	0	0	0	0	8.92316	8.92316	8.92316	8.92316	8.92316	8.92316	10.2269	8.92316	8.92316
chr1:12786079-12822099+	0	0	0	0	0	0	0	0	0	0	0	0	0	0	0	0	0	0	2	0	0	0	0	0	0	0	0	0	0	0	0	0	0	0	0	0	0	0	0	0	8.92316	8.92316	8.92316	8.92316	8.92316	8.92316	8.92316	8.92316	8.92316
chr1:12796766-12822099+	1	0	0	0	0	0	0	0	0	1	0	0	0	0	1	0	0	0	0	0	0	0	0	0	0	0	0	0	0	0	0	0	0	2	0	0	0	0	0	0	9.40746	8.92316	8.92316	8.92316	8.92316	8.92316	8.92316	8.92316	8.92316
chr1:13156370-13167106-	0	0	0	0	0	0	0	0	0	0	0	0	0	0	0	2	1	0	0	0	0	0	0	0	0	0	0	0	0	0	0	0	0	0	0	0	0	0	0	0	8.92316	8.92316	8.92316	8.92316	8.92316	8.92316	8.92316	8.92316	8.92316
chr1:13160161-13167106-	0	1	0	0	1	0	0	0	0	0	0	0	0	0	0	0	0	0	0	0	0	3	0	0	1	0	0	0	0	1	0	0	0	0	0	0	0	0	0	0	8.92316	9.47834	8.92316	8.92316	9.48822	8.92316	8.92316	8.92316	8.92316
chr1:13161590-13162067-	0	0	0	0	0	0	0	0	0	0	0	0	0	0	0	0	0	0	0	0	0	0	0	0	0	0	0	0	0	0	0	0	0	0	0	0	1	0	0	2	8.92316	8.92316	8.92316	8.92316	8.92316	8.92316	8.92316	8.92316	8.92316
chr1:13221307-13224713-	0	1	1	3	1	2	1	1	0	1	0	0	3	0	0	1	1	0	2	3	3	2	2	2	1	0	1	1	0	1	0	0	1	2	3	1	0	0	0	2	8.92316	9.47834	9.48818	10.2004	9.48822	9.98893	9.49805	9.53126	8.92316
chr1:13221307-13286025-	12	5	5	4	3	2	1	2	2	2	6	3	3	4	0	2	0	0	0	2	3	11	8	5	4	4	2	3	1	1	3	4	6	4	1	3	1	0	1	2	11.4559	10.6659	10.6874	10.4583	10.2091	9.98893	9.49805	9.95773	9.90366
chr1:13256883-13286025-	0	0	0	2	0	0	0	0	0	0	0	0	0	0	0	0	0	0	0	0	0	0	0	0	0	0	0	0	0	0	0	0	0	0	0	0	0	0	0	0	8.92316	8.92316	8.92316	9.88598	8.92316	8.92316	8.92316	8.92316	8.92316
chr1:13260612-13286025-	0	0	0	0	0	0	0	0	0	0	0	0	0	0	0	0	0	0	0	0	0	0	0	0	2	0	0	0	0	0	0	0	0	0	0	0	0	0	0	0	8.92316	8.92316	8.92316	8.92316	8.92316	8.92316	8.92316	8.92316	8.92316
chr1:13326415-13335766-	0	0	0	0	0	0	0	0	0	0	0	0	0	0	0	0	0	0	0	0	0	0	0	0	0	0	0	0	0	0	0	0	0	0	0	0	0	0	2	0	8.92316	8.92316	8.92316	8.92316	8.92316	8.92316	8.92316	8.92316	8.92316
chr1:13357736-13359988-	0	0	2	0	0	0	0	0	0	0	0	0	0	0	0	0	0	0	0	0	0	0	0	0	0	0	0	0	1	0	0	0	0	0	0	0	0	0	0	0	8.92316	8.92316	9.89315	8.92316	8.92316	8.92316	8.92316	8.92316	8.92316
chr1:13571803-13576452-	0	0	0	0	1	0	0	0	0	2	0	0	0	0	0	0	0	0	0	0	0	0	0	0	0	0	0	0	0	0	0	0	0	0	0	0	0	0	0	0	8.92316	8.92316	8.92316	8.92316	9.48822	8.92316	8.92316	8.92316	8.92316
chr1:13576368-13581086-	0	0	0	0	0	0	0	0	0	0	0	0	0	0	0	1	0	0	0	0	0	0	0	0	0	0	0	2	1	0	0	0	0	0	0	0	0	2	0	0	8.92316	8.92316	8.92316	8.92316	8.92316	8.92316	8.92316	8.92316	8.92316
chr1:13638231-13650884-	0	0	2	0	1	0	2	0	0	1	3	0	0	0	1	1	4	0	0	0	2	0	0	4	0	2	0	4	0	0	1	1	0	0	0	0	0	0	1	0	8.92316	8.92316	9.89315	8.92316	9.48822	8.92316	9.90803	8.92316	8.92316
chr1:13638231-13652935-	0	0	0	0	0	0	0	0	0	0	0	0	0	0	0	0	0	0	0	0	0	0	0	0	0	0	0	2	2	0	0	0	0	0	0	0	0	0	0	0	8.92316	8.92316	8.92316	8.92316	8.92316	8.92316	8.92316	8.92316	8.92316
chr1:14208895-14253102-	0	0	0	0	0	0	0	0	0	0	0	0	0	0	0	0	0	0	0	0	0	0	0	0	1	0	0	0	0	0	0	0	0	0	0	0	0	2	0	0	8.92316	8.92316	8.92316	8.92316	8.92316	8.92316	8.92316	8.92316	8.92316
chr1:14229493-14253102-	0	0	0	0	0	0	0	0	0	0	0	0	0	0	0	0	0	0	0	0	0	0	0	0	0	0	0	1	0	0	0	0	0	0	0	0	0	2	0	0	8.92316	8.92316	8.92316	8.92316	8.92316	8.92316	8.92316	8.92316	8.92316
chr1:15312363-15313030+	0	0	0	0	0	0	0	0	0	0	0	0	0	0	0	0	0	0	0	0	0	0	3	0	0	0	0	0	2	0	0	0	0	0	0	0	0	0	0	0	8.92316	8.92316	8.92316	8.92316	8.92316	8.92316	8.92316	8.92316	8.92316
chr1:15372906-15373117+	0	0	0	0	0	2	0	0	0	0	0	0	0	0	0	0	0	0	0	0	0	0	0	0	0	0	0	0	0	0	0	0	0	0	0	0	0	0	0	0	8.92316	8.92316	8.92316	8.92316	8.92316	9.98893	8.92316	8.92316	8.92316
chr1:16345704-16394210-	0	0	0	0	0	0	0	0	0	0	0	0	0	0	0	0	0	0	0	0	0	0	0	0	0	0	0	3	0	0	0	0	0	1	0	0	0	0	0	0	8.92316	8.92316	8.92316	8.92316	8.92316	8.92316	8.92316	8.92316	8.92316
chr1:16348625-16348825-	0	0	0	0	0	0	0	0	2	0	0	0	0	0	0	0	0	0	0	0	0	0	0	0	0	0	0	0	0	0	0	0	0	0	0	0	0	0	0	0	8.92316	8.92316	8.92316	8.92316	8.92316	8.92316	8.92316	8.92316	9.90366
chr1:16389821-16394210-	0	0	0	0	0	0	0	2	0	0	0	1	1	0	0	0	0	0	0	0	0	0	0	0	0	1	1	0	0	0	0	0	0	0	0	0	0	0	0	0	8.92316	8.92316	8.92316	8.92316	8.92316	8.92316	8.92316	9.95773	8.92316
chr1:16389821-16440458-	0	0	0	0	0	0	0	0	0	0	0	0	0	2	0	0	0	0	0	0	0	0	0	0	0	0	0	0	0	0	0	0	0	0	0	0	0	0	0	0	8.92316	8.92316	8.92316	8.92316	8.92316	8.92316	8.92316	8.92316	8.92316
chr1:16440323-16463194-	0	1	0	0	0	0	0	0	1	0	1	0	1	0	0	1	0	0	0	0	0	0	0	0	0	0	0	0	0	0	0	0	0	0	3	0	0	0	0	0	8.92316	9.47834	8.92316	8.92316	8.92316	8.92316	8.92316	8.92316	9.49515
chr1:16440323-16486150-	3	0	0	0	0	0	1	0	1	0	2	1	1	3	0	0	0	0	0	0	2	1	3	2	0	0	2	0	1	1	0	0	1	1	0	0	0	0	0	0	10.0585	8.92316	8.92316	8.92316	8.92316	8.92316	9.49805	8.92316	9.49515
chr1:16440323-16486165-	0	2	0	0	0	0	0	0	0	0	0	0	0	0	0	0	0	0	0	0	0	0	0	0	0	0	0	0	0	0	0	0	0	0	0	0	0	0	0	0	8.92316	9.87826	8.92316	8.92316	8.92316	8.92316	8.92316	8.92316	8.92316
chr1:16440323-16509408-	0	2	1	0	0	0	0	1	0	0	1	0	1	1	0	1	1	1	0	0	0	2	0	0	0	1	2	5	1	2	0	0	1	2	0	0	0	4	0	2	8.92316	9.87826	9.48818	8.92316	8.92316	8.92316	8.92316	9.53126	8.92316
chr1:16456794-16459441-	0	0	0	0	0	0	0	0	0	0	0	0	0	0	0	0	0	0	0	0	0	0	0	0	0	0	0	0	0	0	0	0	0	0	0	0	3	0	0	0	8.92316	8.92316	8.92316	8.92316	8.92316	8.92316	8.92316	8.92316	8.92316
chr1:16463035-16509408-	0	0	0	0	0	0	0	0	0	0	0	0	0	1	0	1	2	0	0	0	0	0	0	0	0	0	0	0	0	0	0	0	0	0	0	0	0	0	0	0	8.92316	8.92316	8.92316	8.92316	8.92316	8.92316	8.92316	8.92316	8.92316
chr1:16581927-16598053-	0	0	0	0	0	0	0	0	0	0	0	0	0	0	0	0	0	0	0	0	0	0	0	0	0	0	0	0	0	0	0	1	0	0	0	0	0	0	2	0	8.92316	8.92316	8.92316	8.92316	8.92316	8.92316	8.92316	8.92316	8.92316
chr1:16581927-16602353-	1	0	2	3	0	0	3	0	1	0	0	0	4	1	0	0	0	1	2	0	0	0	1	2	0	0	1	0	1	0	0	0	0	1	2	1	1	0	0	0	9.40746	8.92316	9.89315	10.2004	8.92316	8.92316	10.2269	8.92316	9.49515
chr1:16598346-16598762-	0	0	0	0	2	0	0	0	0	0	0	0	0	0	0	0	0	0	0	0	0	0	0	0	0	0	0	0	0	0	0	0	0	0	0	0	0	0	0	0	8.92316	8.92316	8.92316	8.92316	9.89321	8.92316	8.92316	8.92316	8.92316
chr1:16997464-17004534-	1	2	0	0	0	0	0	1	0	1	0	0	0	0	0	0	0	2	1	0	0	1	0	0	0	0	0	0	0	0	0	0	0	0	0	0	2	0	0	1	9.40746	9.87826	8.92316	8.92316	8.92316	8.92316	8.92316	9.53126	8.92316
chr1:20198018-20239438-	0	0	0	0	1	0	0	0	0	0	0	0	0	0	0	2	0	1	0	0	0	0	0	0	0	0	0	0	0	0	0	0	0	0	0	0	0	0	0	0	8.92316	8.92316	8.92316	8.92316	9.48822	8.92316	8.92316	8.92316	8.92316
chr1:20198018-20288261-	0	0	0	0	0	0	0	0	0	0	0	0	0	0	0	0	0	0	0	0	0	0	0	0	0	0	0	0	0	0	0	0	0	0	0	0	2	0	0	0	8.92316	8.92316	8.92316	8.92316	8.92316	8.92316	8.92316	8.92316	8.92316
chr1:20273086-20288261-	0	0	0	0	0	0	0	0	0	0	0	0	0	0	0	0	0	0	0	0	0	0	0	0	0	0	0	0	0	0	0	0	0	0	0	3	0	0	0	0	8.92316	8.92316	8.92316	8.92316	8.92316	8.92316	8.92316	8.92316	8.92316
chr1:20347211-20381594-	0	0	0	0	2	0	0	0	0	0	0	0	0	0	0	0	0	0	0	0	0	0	0	0	0	0	0	0	0	0	0	0	0	0	0	0	0	1	0	0	8.92316	8.92316	8.92316	8.92316	9.89321	8.92316	8.92316	8.92316	8.92316
chr1:20414221-20503092-	0	0	0	0	0	0	0	0	0	0	0	0	0	0	0	0	0	2	0	0	0	0	0	0	0	0	0	0	0	0	0	0	0	0	0	0	0	0	0	0	8.92316	8.92316	8.92316	8.92316	8.92316	8.92316	8.92316	8.92316	8.92316
chr1:20502942-20509112-	0	0	0	0	0	0	0	0	0	0	0	0	0	0	0	0	0	0	0	0	0	1	0	1	0	0	1	0	0	0	0	0	0	0	1	2	0	0	0	0	8.92316	8.92316	8.92316	8.92316	8.92316	8.92316	8.92316	8.92316	8.92316
chr1:20520154-20524265-	0	0	0	0	0	0	0	0	0	2	0	0	0	0	0	1	0	0	0	0	0	0	0	0	0	0	0	0	0	0	0	0	0	0	3	0	0	0	0	0	8.92316	8.92316	8.92316	8.92316	8.92316	8.92316	8.92316	8.92316	8.92316
chr1:23279430-23281377+	0	0	0	0	0	0	0	0	0	0	0	0	0	0	0	0	0	0	0	0	0	0	0	0	0	0	0	0	0	0	0	2	0	1	0	0	0	0	0	0	8.92316	8.92316	8.92316	8.92316	8.92316	8.92316	8.92316	8.92316	8.92316
chr1:23871738-23872509-	2	0	0	0	0	0	0	0	0	0	0	0	0	0	0	0	0	0	0	0	0	0	0	0	0	0	0	0	0	0	0	0	0	0	0	0	0	0	0	0	9.7694	8.92316	8.92316	8.92316	8.92316	8.92316	8.92316	8.92316	8.92316
chr1:24032663-24044269-	0	0	0	0	0	0	0	0	0	0	0	0	0	2	0	0	0	0	0	0	0	0	0	0	0	0	0	0	0	0	0	0	0	0	0	0	0	0	2	0	8.92316	8.92316	8.92316	8.92316	8.92316	8.92316	8.92316	8.92316	8.92316
chr1:24044114-24086611-	0	0	0	0	1	2	1	0	0	0	0	0	0	0	0	0	0	0	1	1	0	1	0	0	0	0	1	0	0	1	0	0	1	0	1	0	0	0	0	0	8.92316	8.92316	8.92316	8.92316	9.48822	9.98893	9.49805	8.92316	8.92316
chr1:24046358-24067978-	0	0	0	0	0	0	0	0	0	0	0	0	2	0	0	0	0	0	0	0	0	0	0	0	0	0	0	0	0	0	0	0	0	0	0	0	0	0	0	0	8.92316	8.92316	8.92316	8.92316	8.92316	8.92316	8.92316	8.92316	8.92316
chr1:24046358-24086611-	0	0	0	0	0	0	0	0	0	0	0	0	0	0	0	0	0	0	0	0	0	0	0	0	0	0	0	0	0	0	3	0	2	0	2	0	0	0	0	0	8.92316	8.92316	8.92316	8.92316	8.92316	8.92316	8.92316	8.92316	8.92316
chr1:24053183-24067978-	0	0	0	0	0	0	0	0	0	0	0	0	0	0	0	0	0	0	0	0	0	0	0	0	0	0	0	2	0	0	0	0	0	0	0	0	0	0	0	0	8.92316	8.92316	8.92316	8.92316	8.92316	8.92316	8.92316	8.92316	8.92316
chr1:24067899-24086611-	1	0	0	0	0	0	0	0	0	2	1	0	0	0	0	0	0	1	0	0	0	0	1	3	1	1	2	0	0	1	0	1	0	0	0	2	2	0	0	2	9.40746	8.92316	8.92316	8.92316	8.92316	8.92316	8.92316	8.92316	8.92316
chr1:24085411-24086611-	0	1	1	1	5	1	0	1	0	1	1	1	0	0	3	2	0	0	1	1	1	0	1	0	0	2	0	1	0	3	0	2	1	3	2	2	0	0	0	4	8.92316	9.47834	9.48818	9.48344	10.6875	9.5523	8.92316	9.53126	8.92316
chr1:24613191-24613455-	0	0	0	0	0	0	0	0	0	2	0	0	0	0	0	0	0	0	0	0	0	0	0	0	0	0	0	0	0	0	0	0	0	0	0	0	0	0	0	0	8.92316	8.92316	8.92316	8.92316	8.92316	8.92316	8.92316	8.92316	8.92316
chr1:24613191-24613615-	0	0	0	0	0	0	0	0	0	0	0	0	0	0	3	0	0	0	0	0	0	0	0	0	0	0	0	0	0	0	0	0	0	0	0	0	0	0	0	0	8.92316	8.92316	8.92316	8.92316	8.92316	8.92316	8.92316	8.92316	8.92316
chr1:24613447-24613622-	0	1	0	0	0	2	0	0	0	0	0	0	0	0	0	0	0	0	1	0	0	0	0	2	0	0	2	0	0	0	0	0	0	1	0	0	0	0	3	0	8.92316	9.47834	8.92316	8.92316	8.92316	9.98893	8.92316	8.92316	8.92316
chr1:24613567-24615072-	0	0	0	0	0	0	0	0	0	0	0	0	0	0	0	0	0	0	0	0	0	0	0	0	0	0	0	0	0	0	0	0	0	0	0	4	0	0	0	0	8.92316	8.92316	8.92316	8.92316	8.92316	8.92316	8.92316	8.92316	8.92316
chr1:24613775-24614253-	0	0	0	0	0	0	0	0	0	0	0	0	0	0	0	0	0	0	0	0	0	0	0	0	0	0	0	0	0	0	0	0	0	0	0	3	0	0	0	0	8.92316	8.92316	8.92316	8.92316	8.92316	8.92316	8.92316	8.92316	8.92316
chr1:24614372-24614709-	0	0	0	0	2	0	0	0	0	0	0	0	0	0	0	0	0	0	0	0	0	0	0	0	0	0	0	0	0	0	0	0	0	0	0	0	0	0	0	0	8.92316	8.92316	8.92316	8.92316	9.89321	8.92316	8.92316	8.92316	8.92316
chr1:24614899-24615487-	2	0	0	0	0	0	0	0	0	0	0	0	0	0	0	0	0	0	0	0	0	0	0	0	0	0	0	0	0	0	0	0	0	0	0	0	0	0	0	0	9.7694	8.92316	8.92316	8.92316	8.92316	8.92316	8.92316	8.92316	8.92316
chr1:24615756-24615924-	0	0	0	0	0	0	0	0	0	0	0	0	0	0	0	0	0	0	0	0	0	3	0	0	0	0	0	0	0	0	0	0	0	0	0	0	0	0	0	0	8.92316	8.92316	8.92316	8.92316	8.92316	8.92316	8.92316	8.92316	8.92316
chr1:24684049-24684213+	0	0	2	0	0	0	0	1	0	0	0	0	0	0	0	0	0	1	0	0	0	0	0	0	0	1	0	0	0	0	0	0	0	0	0	1	0	0	0	0	8.92316	8.92316	9.89315	8.92316	8.92316	8.92316	8.92316	9.53126	8.92316
chr1:24704821-24714982+	0	0	0	0	0	0	0	0	0	0	0	0	0	2	0	0	0	0	0	0	0	0	0	0	0	0	0	0	0	0	0	0	0	0	0	2	0	0	0	0	8.92316	8.92316	8.92316	8.92316	8.92316	8.92316	8.92316	8.92316	8.92316
chr1:24711512-24731899+	1	0	0	0	0	0	2	0	0	0	0	0	0	0	0	1	1	0	0	0	1	1	2	0	3	0	1	0	0	2	0	0	0	0	0	0	0	0	0	0	9.40746	8.92316	8.92316	8.92316	8.92316	8.92316	9.90803	8.92316	8.92316
chr1:24728546-24731899+	0	0	0	0	0	0	0	0	0	2	1	0	0	0	0	0	0	0	0	0	0	0	0	0	0	0	0	0	0	0	0	0	0	0	0	0	0	0	0	0	8.92316	8.92316	8.92316	8.92316	8.92316	8.92316	8.92316	8.92316	8.92316
chr1:25531870-25532639-	0	0	0	0	0	0	2	0	0	0	0	0	0	0	0	0	0	0	0	0	0	0	0	0	0	0	0	0	0	0	0	0	0	0	0	0	0	0	0	0	8.92316	8.92316	8.92316	8.92316	8.92316	8.92316	9.90803	8.92316	8.92316
chr1:25589343-25670213-	0	0	0	0	0	0	0	0	0	0	0	3	0	0	0	0	0	0	0	0	0	0	0	0	0	0	0	0	0	0	0	0	0	0	0	0	0	0	0	0	8.92316	8.92316	8.92316	8.92316	8.92316	8.92316	8.92316	8.92316	8.92316
chr1:30810683-30811967-	0	0	0	0	1	0	0	0	0	0	0	0	3	0	0	0	0	0	0	0	0	0	0	0	1	0	0	0	0	0	0	0	0	0	0	0	0	0	0	0	8.92316	8.92316	8.92316	8.92316	9.48822	8.92316	8.92316	8.92316	8.92316
chr1:30820081-30821314-	2	0	0	0	0	0	0	0	0	0	0	0	0	0	0	0	0	0	0	1	0	0	0	0	0	0	0	0	0	0	0	0	0	0	0	0	0	0	0	0	9.7694	8.92316	8.92316	8.92316	8.92316	8.92316	8.92316	8.92316	8.92316
chr1:30820081-30831559-	0	0	0	0	0	0	0	0	0	0	0	0	0	0	0	0	0	0	0	0	0	0	0	0	0	0	0	0	2	0	0	0	0	0	0	0	0	0	0	0	8.92316	8.92316	8.92316	8.92316	8.92316	8.92316	8.92316	8.92316	8.92316
chr1:30837105-30852950-	0	0	0	0	0	0	0	0	0	0	0	1	0	0	0	0	0	0	0	0	0	0	0	0	0	0	0	0	0	0	0	0	0	0	0	0	2	0	1	0	8.92316	8.92316	8.92316	8.92316	8.92316	8.92316	8.92316	8.92316	8.92316
chr1:30837105-30863255-	1	3	0	0	0	0	2	0	1	0	0	0	0	0	0	0	0	0	0	0	1	0	0	1	0	1	0	0	0	1	2	1	0	0	0	0	0	1	0	0	9.40746	10.191	8.92316	8.92316	8.92316	8.92316	9.90803	8.92316	9.49515
chr1:30862987-30863255-	0	0	0	0	0	0	0	0	0	0	0	0	0	0	0	0	0	0	0	0	0	0	0	0	0	0	0	0	0	0	2	0	1	0	1	0	0	0	0	0	8.92316	8.92316	8.92316	8.92316	8.92316	8.92316	8.92316	8.92316	8.92316
chr1:33480458-33533363-	2	0	0	0	0	0	0	0	0	0	0	0	0	0	0	0	0	0	0	0	0	0	0	0	0	0	0	0	0	0	0	0	0	0	0	0	0	0	0	0	9.7694	8.92316	8.92316	8.92316	8.92316	8.92316	8.92316	8.92316	8.92316
chr1:33512016-33514217-	1	1	0	0	0	0	0	0	1	0	0	0	0	1	0	0	0	0	0	0	1	0	0	1	0	0	0	0	0	0	0	0	0	0	0	0	0	3	0	0	9.40746	9.47834	8.92316	8.92316	8.92316	8.92316	8.92316	8.92316	9.49515
chr1:33628395-33630433-	0	0	0	0	0	2	0	0	0	0	0	0	0	0	0	0	0	0	0	0	0	0	0	0	1	0	1	1	1	0	0	0	0	0	0	0	1	0	0	4	8.92316	8.92316	8.92316	8.92316	8.92316	9.98893	8.92316	8.92316	8.92316
chr1:33779044-33783964-	0	0	0	0	0	0	0	0	0	0	0	0	0	0	0	0	0	0	0	0	1	0	0	0	0	2	0	0	0	0	0	0	0	0	0	3	0	0	0	0	8.92316	8.92316	8.92316	8.92316	8.92316	8.92316	8.92316	8.92316	8.92316
chr1:33783041-33786532-	0	0	0	2	1	0	0	0	1	0	0	0	0	0	0	0	0	0	0	0	1	1	0	0	1	0	0	0	0	0	0	0	0	0	0	0	0	0	0	0	8.92316	8.92316	8.92316	9.88598	9.48822	8.92316	8.92316	8.92316	9.49515
chr1:34113933-34117524+	0	0	0	0	0	0	0	0	0	0	0	0	0	0	0	0	0	0	0	0	0	0	0	0	0	0	0	0	0	0	0	0	0	0	0	0	0	2	0	0	8.92316	8.92316	8.92316	8.92316	8.92316	8.92316	8.92316	8.92316	8.92316
chr1:34223804-34229246+	0	0	0	1	0	0	0	0	0	0	0	0	0	0	0	0	0	0	0	0	0	0	0	0	0	0	0	0	0	0	0	0	0	0	0	3	0	0	0	0	8.92316	8.92316	8.92316	9.48344	8.92316	8.92316	8.92316	8.92316	8.92316
chr1:34225540-34225792+	0	0	0	0	0	0	0	0	0	0	0	0	0	0	1	0	0	0	0	2	0	0	0	0	0	0	0	0	0	0	0	0	0	0	0	0	0	0	0	0	8.92316	8.92316	8.92316	8.92316	8.92316	8.92316	8.92316	8.92316	8.92316
chr1:34299721-34303531+	0	0	0	0	0	0	0	0	0	0	0	0	0	0	0	0	0	0	0	0	0	0	0	0	0	0	0	0	0	0	0	0	2	0	0	0	0	0	0	0	8.92316	8.92316	8.92316	8.92316	8.92316	8.92316	8.92316	8.92316	8.92316
chr1:34462702-34463504+	2	0	0	0	0	0	0	0	0	0	0	0	0	0	0	0	0	0	0	0	0	0	0	0	0	0	0	0	0	0	0	0	0	0	0	0	0	0	0	0	9.7694	8.92316	8.92316	8.92316	8.92316	8.92316	8.92316	8.92316	8.92316
chr1:34462702-34468361+	1	1	0	1	0	0	1	1	0	0	1	0	0	2	1	1	0	0	0	1	2	0	0	2	0	2	0	0	0	0	0	0	0	0	0	0	0	0	0	0	9.40746	9.47834	8.92316	9.48344	8.92316	8.92316	9.49805	9.53126	8.92316
chr1:36074253-36084892+	0	0	0	2	0	0	0	0	0	0	0	0	0	0	0	0	1	0	0	1	0	0	0	0	0	0	1	0	0	2	3	0	1	0	2	0	0	0	1	0	8.92316	8.92316	8.92316	9.88598	8.92316	8.92316	8.92316	8.92316	8.92316
chr1:36150045-36170294-	0	0	0	0	0	0	0	0	0	0	0	0	0	0	0	0	0	0	0	0	0	0	0	0	0	0	0	0	0	0	0	0	0	0	0	0	4	0	0	1	8.92316	8.92316	8.92316	8.92316	8.92316	8.92316	8.92316	8.92316	8.92316
chr1:36173435-36179679-	0	0	0	0	0	0	0	0	0	0	1	1	0	2	0	0	0	0	0	0	0	0	0	0	0	0	0	0	0	0	0	0	0	0	0	0	0	0	0	0	8.92316	8.92316	8.92316	8.92316	8.92316	8.92316	8.92316	8.92316	8.92316
chr1:36179559-36185968-	0	0	0	0	0	0	0	2	0	0	0	0	0	0	0	0	0	0	0	0	0	0	0	0	0	0	0	0	0	0	0	0	0	0	0	0	0	0	0	0	8.92316	8.92316	8.92316	8.92316	8.92316	8.92316	8.92316	9.95773	8.92316
chr1:36191529-36197635-	0	0	0	0	0	0	0	0	0	0	0	0	0	0	0	0	0	0	0	0	0	0	0	0	0	0	2	1	1	0	0	0	0	1	0	0	0	0	0	3	8.92316	8.92316	8.92316	8.92316	8.92316	8.92316	8.92316	8.92316	8.92316
chr1:36195850-36197635-	0	0	0	0	0	0	0	0	0	0	0	2	0	0	0	0	2	2	0	0	0	0	0	1	0	0	0	1	0	0	0	1	0	1	0	2	0	0	0	0	8.92316	8.92316	8.92316	8.92316	8.92316	8.92316	8.92316	8.92316	8.92316
chr1:36216132-36234942-	0	0	0	0	0	0	0	0	0	0	0	0	0	0	0	0	0	0	0	0	0	0	0	0	0	0	0	0	0	0	0	0	0	2	0	0	0	0	0	0	8.92316	8.92316	8.92316	8.92316	8.92316	8.92316	8.92316	8.92316	8.92316
chr1:36343251-36358460-	0	3	0	0	0	0	0	0	0	0	0	0	0	0	0	0	0	0	0	0	0	0	0	0	0	1	0	0	0	0	0	0	0	0	0	0	0	0	0	0	8.92316	10.191	8.92316	8.92316	8.92316	8.92316	8.92316	8.92316	8.92316
chr1:36424838-36443609-	2	0	0	0	0	0	0	0	0	0	0	0	0	0	0	0	0	0	0	0	0	0	0	0	0	0	0	0	0	0	0	0	0	0	0	0	0	0	0	0	9.7694	8.92316	8.92316	8.92316	8.92316	8.92316	8.92316	8.92316	8.92316
chr1:36439609-36440227-	0	0	0	0	0	0	0	0	0	0	0	2	0	0	0	0	0	0	0	0	0	0	0	0	0	0	0	0	0	0	0	0	0	0	0	0	0	0	0	0	8.92316	8.92316	8.92316	8.92316	8.92316	8.92316	8.92316	8.92316	8.92316
chr1:36497990-36499981+	0	0	0	0	0	0	0	0	0	0	0	0	2	0	0	0	0	0	0	0	0	0	0	0	0	0	0	0	0	0	0	0	0	0	0	0	0	0	0	0	8.92316	8.92316	8.92316	8.92316	8.92316	8.92316	8.92316	8.92316	8.92316
chr1:36498019-36520598+	0	0	0	0	0	1	0	2	0	1	0	0	0	0	0	0	0	0	0	0	0	0	0	0	0	0	0	0	0	0	0	0	0	0	0	0	0	0	0	0	8.92316	8.92316	8.92316	8.92316	8.92316	9.5523	8.92316	9.95773	8.92316
chr1:36815455-36823153-	0	0	0	0	1	0	0	0	0	0	0	0	0	0	0	1	0	1	0	0	0	0	0	0	0	0	1	0	0	0	3	0	0	0	2	0	0	0	0	0	8.92316	8.92316	8.92316	8.92316	9.48822	8.92316	8.92316	8.92316	8.92316
chr1:36815913-36819144-	0	0	0	0	0	0	0	0	0	0	0	0	0	0	0	0	0	0	0	0	0	0	0	0	0	0	0	0	0	0	0	0	0	0	0	2	0	0	0	0	8.92316	8.92316	8.92316	8.92316	8.92316	8.92316	8.92316	8.92316	8.92316
chr1:36834762-36840511-	0	0	0	0	0	0	0	0	0	0	0	0	0	0	0	0	5	0	0	0	0	0	0	0	0	0	0	0	0	0	0	0	0	0	0	0	0	0	0	0	8.92316	8.92316	8.92316	8.92316	8.92316	8.92316	8.92316	8.92316	8.92316
chr1:36854844-36889325-	0	1	0	0	0	0	3	1	0	0	2	0	1	0	1	0	0	0	0	1	0	0	0	0	0	1	0	0	0	0	0	0	0	0	0	1	0	0	0	0	8.92316	9.47834	8.92316	8.92316	8.92316	8.92316	10.2269	9.53126	8.92316
chr1:37377578-37380060+	0	0	0	1	0	0	0	0	0	0	0	1	1	0	2	0	0	0	0	0	0	2	0	1	1	3	0	1	0	0	0	0	0	0	0	2	0	0	0	1	8.92316	8.92316	8.92316	9.48344	8.92316	8.92316	8.92316	8.92316	8.92316
chr1:37441830-37442059-	0	0	0	0	0	0	0	0	0	0	0	0	0	0	0	0	0	0	0	0	0	0	0	0	0	0	0	0	0	0	0	0	0	0	0	0	0	0	0	2	8.92316	8.92316	8.92316	8.92316	8.92316	8.92316	8.92316	8.92316	8.92316
chr1:37456590-37464534-	0	0	0	0	0	1	3	0	0	0	1	1	0	0	0	0	0	1	0	0	0	0	0	2	2	1	1	2	2	1	0	0	0	1	1	0	0	0	1	0	8.92316	8.92316	8.92316	8.92316	8.92316	9.5523	10.2269	8.92316	8.92316
chr1:37456590-37466583-	0	0	0	0	0	0	0	0	0	0	0	0	0	0	0	0	0	0	0	0	0	0	0	0	0	0	0	0	0	0	0	0	0	0	0	0	0	0	0	2	8.92316	8.92316	8.92316	8.92316	8.92316	8.92316	8.92316	8.92316	8.92316
chr1:37462892-37466583-	0	0	2	0	0	0	0	0	0	0	0	0	0	0	0	0	0	0	0	0	0	0	0	0	0	0	0	0	0	0	0	0	0	0	0	0	0	0	0	0	8.92316	8.92316	9.89315	8.92316	8.92316	8.92316	8.92316	8.92316	8.92316
chr1:37464421-37498740-	0	0	0	0	0	0	0	0	0	0	0	0	0	0	2	0	0	0	0	0	0	0	0	0	1	0	0	0	0	1	0	1	0	0	0	0	0	1	0	0	8.92316	8.92316	8.92316	8.92316	8.92316	8.92316	8.92316	8.92316	8.92316
chr1:37485839-37488741-	0	0	0	2	0	0	0	0	0	0	0	0	0	0	0	0	0	0	0	0	0	0	0	0	0	0	0	0	0	0	0	0	0	0	0	0	0	0	0	0	8.92316	8.92316	8.92316	9.88598	8.92316	8.92316	8.92316	8.92316	8.92316
chr1:37489139-37494672-	0	0	0	0	0	0	0	0	0	0	0	0	0	0	0	0	0	0	0	0	0	0	3	0	1	0	0	0	0	0	0	0	0	0	0	0	0	0	0	0	8.92316	8.92316	8.92316	8.92316	8.92316	8.92316	8.92316	8.92316	8.92316
chr1:37490260-37496013-	2	0	0	0	0	0	0	0	0	0	0	0	0	0	3	0	0	0	0	0	0	0	0	0	2	0	0	0	0	0	0	0	1	1	0	1	0	0	0	0	9.7694	8.92316	8.92316	8.92316	8.92316	8.92316	8.92316	8.92316	8.92316
chr1:37490260-37498740-	8	7	14	11	8	4	4	6	7	7	4	7	3	4	2	6	2	5	7	10	12	1	17	13	11	5	15	6	15	15	2	10	6	10	2	18	8	6	7	9	10.9905	11.0226	11.8702	11.5601	11.1969	10.5952	10.4879	10.9747	11.0626
chr1:37490260-37536404-	2	0	0	0	1	1	1	2	0	0	0	0	0	0	0	0	1	0	1	0	1	0	0	1	0	0	2	3	2	0	1	1	0	1	2	5	1	0	1	0	9.7694	8.92316	8.92316	8.92316	9.48822	9.5523	9.49805	9.95773	8.92316
chr1:37536039-37536404-	0	0	0	1	0	1	4	0	0	0	0	1	0	0	0	0	0	0	0	1	0	0	0	4	4	0	1	3	1	1	0	1	0	1	0	0	0	0	0	0	8.92316	8.92316	8.92316	9.48344	8.92316	9.5523	10.4879	8.92316	8.92316
chr1:37624069-37624517-	0	0	0	0	0	0	3	0	0	0	0	0	0	0	0	0	0	0	0	0	0	0	0	0	0	0	0	0	0	0	0	0	0	0	0	0	0	0	0	0	8.92316	8.92316	8.92316	8.92316	8.92316	8.92316	10.2269	8.92316	8.92316
chr1:37801720-37819640-	0	0	0	0	0	1	0	0	0	1	0	0	0	0	0	0	1	0	0	0	0	0	0	0	2	0	0	1	0	0	0	1	1	0	1	0	0	0	0	0	8.92316	8.92316	8.92316	8.92316	8.92316	9.5523	8.92316	8.92316	8.92316
chr1:37878969-37881048-	0	0	0	0	0	0	0	0	0	0	0	0	0	0	0	0	0	0	0	0	0	0	0	0	0	0	0	0	0	0	0	0	0	0	0	0	0	0	3	0	8.92316	8.92316	8.92316	8.92316	8.92316	8.92316	8.92316	8.92316	8.92316
chr1:37879179-37882698-	0	0	0	0	0	0	0	0	0	2	0	0	0	0	0	0	0	0	0	0	0	0	0	0	0	0	0	0	0	0	0	0	0	0	0	0	0	0	0	0	8.92316	8.92316	8.92316	8.92316	8.92316	8.92316	8.92316	8.92316	8.92316
chr1:37990203-37990457-	0	0	0	0	0	0	0	0	0	0	0	0	0	2	0	0	0	0	0	0	0	0	0	0	0	0	0	0	0	0	0	0	0	0	0	0	0	0	0	0	8.92316	8.92316	8.92316	8.92316	8.92316	8.92316	8.92316	8.92316	8.92316
chr1:38017806-38022314+	0	0	2	1	0	0	0	0	0	0	0	0	0	0	1	0	0	0	0	0	0	0	0	0	1	0	0	0	2	0	0	0	0	0	0	0	0	0	0	0	8.92316	8.92316	9.89315	9.48344	8.92316	8.92316	8.92316	8.92316	8.92316
chr1:38053034-38085652-	0	0	0	0	0	0	0	0	0	0	0	0	0	0	0	2	1	0	0	0	0	0	0	0	0	0	0	0	0	0	0	0	0	0	0	0	0	0	0	0	8.92316	8.92316	8.92316	8.92316	8.92316	8.92316	8.92316	8.92316	8.92316
chr1:38053616-38085652-	4	4	2	4	3	1	7	3	2	1	1	1	6	3	0	2	1	5	2	4	7	6	2	2	3	5	7	3	4	2	2	6	1	2	1	10	9	7	4	1	10.2992	10.4479	9.89315	10.4583	10.2091	9.5523	11.0695	10.2865	9.90366
chr1:38083704-38108467-	0	0	0	0	0	0	0	0	0	0	0	0	0	0	0	0	0	0	0	0	0	0	0	3	0	0	0	0	0	0	0	0	0	0	0	0	0	0	0	0	8.92316	8.92316	8.92316	8.92316	8.92316	8.92316	8.92316	8.92316	8.92316
chr1:38107568-38108467-	1	0	0	0	1	0	0	1	0	2	0	0	0	1	1	0	0	0	0	0	0	0	0	0	0	0	0	0	2	0	0	0	0	0	0	0	1	0	0	1	9.40746	8.92316	8.92316	8.92316	9.48822	8.92316	8.92316	9.53126	8.92316
chr1:38534906-38536946-	2	1	2	1	2	0	4	1	1	0	1	2	3	0	0	0	1	1	0	1	0	0	1	0	1	0	1	0	1	1	0	1	1	2	0	2	0	0	0	1	9.7694	9.47834	9.89315	9.48344	9.89321	8.92316	10.4879	9.53126	9.49515
chr1:39287468-39300733+	2	0	1	2	0	1	0	1	3	0	0	1	0	0	0	0	0	1	4	0	0	2	3	0	2	0	0	1	0	0	0	0	0	0	1	1	0	3	4	0	9.7694	8.92316	9.48818	9.88598	8.92316	9.5523	8.92316	9.53126	10.2217
chr1:39287468-39313068+	0	0	0	0	0	0	0	0	0	0	1	0	0	0	0	0	0	0	0	0	0	0	0	0	0	0	0	0	0	0	4	0	1	0	1	0	1	0	0	0	8.92316	8.92316	8.92316	8.92316	8.92316	8.92316	8.92316	8.92316	8.92316
chr1:39300644-39338199+	1	0	2	0	0	0	0	0	0	0	0	0	0	0	0	0	0	0	0	0	0	0	0	0	0	0	0	0	0	0	0	0	0	0	0	0	0	0	0	0	9.40746	8.92316	9.89315	8.92316	8.92316	8.92316	8.92316	8.92316	8.92316
chr1:39402683-39406870-	0	0	0	0	0	0	0	0	0	0	0	0	0	0	0	0	0	0	2	0	0	0	2	0	0	0	0	0	0	0	0	0	0	0	0	0	0	0	0	0	8.92316	8.92316	8.92316	8.92316	8.92316	8.92316	8.92316	8.92316	8.92316
chr1:39539873-39542602+	0	0	2	0	0	0	0	0	0	1	0	0	0	0	0	0	0	0	0	0	0	0	0	0	0	0	0	0	0	0	0	0	0	0	0	0	0	0	0	0	8.92316	8.92316	9.89315	8.92316	8.92316	8.92316	8.92316	8.92316	8.92316
chr1:39555478-39565332-	0	2	1	0	0	0	0	0	0	0	0	1	0	1	0	1	1	2	1	1	1	3	0	0	0	1	0	1	2	0	0	0	0	0	1	0	0	0	0	3	8.92316	9.87826	9.48818	8.92316	8.92316	8.92316	8.92316	8.92316	8.92316
chr1:39560693-39565332-	1	0	0	0	0	0	0	0	0	0	0	0	0	3	0	0	0	1	0	0	0	0	0	0	1	0	0	0	0	0	0	0	0	0	0	0	1	0	0	0	9.40746	8.92316	8.92316	8.92316	8.92316	8.92316	8.92316	8.92316	8.92316
chr1:39564048-39565332-	0	0	0	0	2	0	0	0	0	0	0	0	0	0	0	0	3	0	0	0	0	0	0	0	0	0	0	0	0	0	0	1	0	0	0	0	0	0	4	1	8.92316	8.92316	8.92316	8.92316	9.89321	8.92316	8.92316	8.92316	8.92316
chr1:39997021-40000749+	0	0	0	0	0	0	0	0	0	0	0	0	0	0	0	0	2	0	0	0	0	0	0	0	0	0	0	0	0	0	0	0	0	0	0	1	0	0	0	0	8.92316	8.92316	8.92316	8.92316	8.92316	8.92316	8.92316	8.92316	8.92316
chr1:40003757-40010677+	0	0	0	0	0	1	0	0	0	0	0	0	0	0	0	0	0	3	0	0	0	0	0	0	0	0	0	0	0	0	0	0	0	0	0	0	0	0	0	0	8.92316	8.92316	8.92316	8.92316	8.92316	9.5523	8.92316	8.92316	8.92316
chr1:40276098-40277331+	0	2	0	0	1	0	0	0	0	0	0	0	0	0	0	0	0	0	0	0	0	0	0	0	0	0	0	0	0	0	0	0	0	0	0	0	0	0	0	0	8.92316	9.87826	8.92316	8.92316	9.48822	8.92316	8.92316	8.92316	8.92316
chr1:40338213-40343190+	0	0	0	0	0	0	0	0	0	0	0	0	0	0	0	0	0	0	0	0	0	0	0	0	0	0	0	0	0	0	0	0	0	0	2	0	0	0	0	0	8.92316	8.92316	8.92316	8.92316	8.92316	8.92316	8.92316	8.92316	8.92316
chr1:40441292-40442761+	0	0	0	0	0	0	0	0	0	0	0	0	0	0	0	2	0	0	0	0	0	0	0	0	0	1	0	0	0	0	0	0	0	0	0	0	0	0	0	0	8.92316	8.92316	8.92316	8.92316	8.92316	8.92316	8.92316	8.92316	8.92316
chr1:40602853-40610387+	0	0	0	0	0	0	0	0	0	0	0	0	0	0	0	0	0	0	0	0	0	0	0	0	0	0	0	2	0	0	0	0	0	0	0	0	0	0	0	0	8.92316	8.92316	8.92316	8.92316	8.92316	8.92316	8.92316	8.92316	8.92316
chr1:40718595-40726458+	0	0	0	0	0	1	0	1	0	0	0	0	3	0	0	0	0	0	0	0	0	0	0	0	0	0	1	0	0	3	0	0	0	0	0	0	0	0	0	0	8.92316	8.92316	8.92316	8.92316	8.92316	9.5523	8.92316	9.53126	8.92316
chr1:40742620-40744005+	0	0	0	0	2	0	0	0	0	0	0	0	0	0	0	0	0	0	0	0	0	1	0	0	0	0	0	0	0	0	0	0	0	0	4	0	0	0	0	0	8.92316	8.92316	8.92316	8.92316	9.89321	8.92316	8.92316	8.92316	8.92316
chr1:43067474-43075952-	0	1	0	0	0	0	2	0	0	0	0	0	0	0	0	0	0	0	0	0	0	0	0	0	0	0	0	0	0	0	0	0	0	0	0	0	0	0	0	0	8.92316	9.47834	8.92316	8.92316	8.92316	8.92316	9.90803	8.92316	8.92316
chr1:43141698-43153254-	0	0	0	1	0	0	0	0	0	0	0	0	0	0	0	3	2	0	0	0	0	0	1	0	0	0	2	1	0	1	0	2	2	0	1	0	1	0	0	1	8.92316	8.92316	8.92316	9.48344	8.92316	8.92316	8.92316	8.92316	8.92316
chr1:43509621-43533793+	0	0	0	0	0	0	0	0	0	0	0	0	0	0	0	0	0	0	0	0	0	0	0	0	0	0	1	1	0	0	0	0	0	0	0	2	0	0	0	0	8.92316	8.92316	8.92316	8.92316	8.92316	8.92316	8.92316	8.92316	8.92316
chr1:43755699-43765009-	0	0	0	0	3	0	0	0	0	0	0	0	0	0	0	0	0	0	0	0	0	0	0	0	0	0	0	0	0	0	0	0	0	0	0	0	0	0	0	0	8.92316	8.92316	8.92316	8.92316	10.2091	8.92316	8.92316	8.92316	8.92316
chr1:43774817-43807377-	0	0	0	0	0	0	0	0	0	0	0	0	0	0	0	0	0	0	0	1	0	0	0	0	0	2	0	1	0	0	0	0	0	0	0	0	0	0	0	0	8.92316	8.92316	8.92316	8.92316	8.92316	8.92316	8.92316	8.92316	8.92316
chr1:43790464-43807377-	0	0	0	3	1	0	0	1	0	1	1	1	0	1	0	1	6	1	0	0	0	1	0	1	0	0	0	0	0	0	0	0	0	1	0	1	0	0	0	0	8.92316	8.92316	8.92316	10.2004	9.48822	8.92316	8.92316	9.53126	8.92316
chr1:43797245-43807377-	0	2	0	0	0	3	2	1	1	0	1	1	1	3	1	1	1	0	0	0	0	0	0	1	0	0	0	1	0	0	0	1	0	1	0	4	2	0	0	1	8.92316	9.87826	8.92316	8.92316	8.92316	10.3237	9.90803	9.53126	9.49515
chr1:43797245-43816964-	0	0	0	0	0	1	0	0	0	2	0	0	0	0	0	1	0	0	0	0	0	0	0	0	0	0	0	0	0	0	0	0	0	0	0	1	0	0	5	0	8.92316	8.92316	8.92316	8.92316	8.92316	9.5523	8.92316	8.92316	8.92316
chr1:43953257-43956625+	1	3	0	0	0	0	1	1	0	1	0	0	0	0	0	0	1	0	0	0	0	0	0	3	0	0	0	1	1	0	0	0	0	0	1	0	0	0	0	0	9.40746	10.191	8.92316	8.92316	8.92316	8.92316	9.49805	9.53126	8.92316
chr1:43957436-43972687+	0	0	0	0	0	0	0	0	0	0	0	0	0	0	0	0	0	0	0	0	2	0	0	0	0	0	0	0	0	0	0	0	0	0	0	0	0	0	0	0	8.92316	8.92316	8.92316	8.92316	8.92316	8.92316	8.92316	8.92316	8.92316
chr1:43960084-43973520+	2	0	0	0	1	0	0	0	0	0	0	0	0	0	0	1	0	0	1	0	0	0	0	0	0	1	2	0	0	0	0	0	0	0	0	1	0	0	0	0	9.7694	8.92316	8.92316	8.92316	9.48822	8.92316	8.92316	8.92316	8.92316
chr1:43960084-43978835+	0	0	0	0	0	0	0	0	0	0	0	0	0	0	0	0	0	0	0	0	0	0	0	0	0	0	0	0	0	0	0	0	0	0	0	0	0	0	2	0	8.92316	8.92316	8.92316	8.92316	8.92316	8.92316	8.92316	8.92316	8.92316
chr1:43980294-44002165+	0	0	2	0	0	0	0	0	0	0	0	0	0	0	0	0	0	2	1	0	2	0	0	0	0	0	0	0	0	0	0	0	0	0	0	0	0	0	0	0	8.92316	8.92316	9.89315	8.92316	8.92316	8.92316	8.92316	8.92316	8.92316
chr1:43987936-43988093+	0	0	0	0	0	0	0	0	0	0	0	0	0	2	0	0	0	0	0	0	0	0	0	0	0	0	0	0	0	0	0	0	0	0	0	0	0	0	0	0	8.92316	8.92316	8.92316	8.92316	8.92316	8.92316	8.92316	8.92316	8.92316
chr1:44126266-44128823+	0	0	3	0	0	0	0	0	0	0	0	0	0	0	0	0	0	0	1	0	0	0	2	0	1	0	0	0	0	0	0	0	0	2	0	0	0	0	0	0	8.92316	8.92316	10.209	8.92316	8.92316	8.92316	8.92316	8.92316	8.92316
chr1:44156937-44167882+	1	0	0	1	0	0	0	1	0	0	0	0	2	0	0	0	0	0	0	0	0	0	0	0	0	0	1	0	0	1	0	1	0	0	2	0	0	0	0	0	9.40746	8.92316	8.92316	9.48344	8.92316	8.92316	8.92316	9.53126	8.92316
chr1:44161810-44174375+	0	0	0	0	2	0	0	0	0	0	0	0	0	0	0	0	0	0	0	0	0	0	0	0	0	0	0	0	0	0	0	0	0	0	0	0	0	0	0	0	8.92316	8.92316	8.92316	8.92316	9.89321	8.92316	8.92316	8.92316	8.92316
chr1:44744474-44788542+	1	1	0	0	0	0	0	0	0	0	2	0	0	0	0	0	0	0	0	1	0	0	0	0	0	0	0	0	0	0	0	0	0	0	0	0	0	0	0	0	9.40746	9.47834	8.92316	8.92316	8.92316	8.92316	8.92316	8.92316	8.92316
chr1:44766014-44781106+	0	0	0	0	1	0	0	0	0	0	0	0	0	0	0	0	0	0	0	0	0	0	0	0	0	0	0	2	2	0	0	0	1	0	0	0	0	0	0	0	8.92316	8.92316	8.92316	8.92316	9.48822	8.92316	8.92316	8.92316	8.92316
chr1:45347231-45348834+	0	0	0	0	0	0	0	0	0	0	0	3	0	0	0	0	0	0	0	0	0	0	0	0	0	0	0	0	0	0	0	0	0	0	0	0	0	0	0	0	8.92316	8.92316	8.92316	8.92316	8.92316	8.92316	8.92316	8.92316	8.92316
chr1:45421944-45423726-	0	0	0	0	0	0	0	0	1	0	0	0	0	0	0	0	0	0	0	0	0	0	0	0	0	0	0	0	0	0	0	0	0	0	0	0	0	1	3	0	8.92316	8.92316	8.92316	8.92316	8.92316	8.92316	8.92316	8.92316	9.49515
chr1:45798235-45798442+	0	0	0	0	0	0	0	0	0	0	0	1	0	2	0	0	0	0	0	0	0	0	0	0	0	0	0	0	0	0	0	0	0	0	0	0	0	0	0	0	8.92316	8.92316	8.92316	8.92316	8.92316	8.92316	8.92316	8.92316	8.92316
chr1:45814541-45816634+	0	0	0	0	0	0	0	0	0	0	0	0	0	0	0	0	0	0	0	0	0	0	0	0	0	0	0	0	0	0	0	0	0	0	0	2	0	0	0	0	8.92316	8.92316	8.92316	8.92316	8.92316	8.92316	8.92316	8.92316	8.92316
chr1:45857243-45857526-	0	0	0	0	0	0	0	0	0	0	0	0	0	0	0	0	0	0	0	0	0	0	0	0	0	0	0	0	0	0	0	0	0	0	2	0	0	0	0	0	8.92316	8.92316	8.92316	8.92316	8.92316	8.92316	8.92316	8.92316	8.92316
chr1:51813003-51824201-	0	0	0	0	0	0	0	0	0	0	0	2	0	0	0	0	0	0	0	0	0	0	0	0	0	0	0	0	0	0	0	0	0	0	0	0	0	0	0	0	8.92316	8.92316	8.92316	8.92316	8.92316	8.92316	8.92316	8.92316	8.92316
chr1:51813003-51834543-	0	0	0	0	0	0	0	0	0	0	0	0	0	0	0	0	2	0	0	0	1	0	0	0	0	0	0	0	0	0	0	0	0	0	0	0	0	0	0	0	8.92316	8.92316	8.92316	8.92316	8.92316	8.92316	8.92316	8.92316	8.92316
chr1:51813003-51863434-	0	0	0	0	0	0	0	0	1	0	0	0	0	0	0	0	0	0	0	0	0	0	0	0	0	0	0	2	0	0	0	0	0	0	0	0	0	1	0	0	8.92316	8.92316	8.92316	8.92316	8.92316	8.92316	8.92316	8.92316	9.49515
chr1:51820141-51834543-	0	0	0	0	0	0	0	0	0	0	0	0	0	0	0	0	0	0	0	0	0	0	0	0	3	0	0	0	0	0	0	0	0	0	0	0	0	0	0	0	8.92316	8.92316	8.92316	8.92316	8.92316	8.92316	8.92316	8.92316	8.92316
chr1:51834449-51863434-	0	0	0	0	0	0	0	0	0	0	0	0	0	0	0	0	0	0	0	0	3	0	0	0	0	0	0	0	0	0	0	0	0	0	0	0	0	0	0	0	8.92316	8.92316	8.92316	8.92316	8.92316	8.92316	8.92316	8.92316	8.92316
chr1:52162549-52163275+	0	0	0	0	0	0	0	0	0	0	0	0	0	0	0	0	0	0	0	0	0	0	0	0	0	0	0	0	0	0	0	0	0	0	0	0	2	0	0	0	8.92316	8.92316	8.92316	8.92316	8.92316	8.92316	8.92316	8.92316	8.92316
chr1:52188679-52215694-	2	0	0	0	0	0	0	0	0	0	0	0	2	0	0	0	2	0	1	1	4	2	0	0	2	0	0	1	2	1	1	0	0	0	3	2	0	0	0	0	9.7694	8.92316	8.92316	8.92316	8.92316	8.92316	8.92316	8.92316	8.92316
chr1:52196165-52212366-	0	0	0	1	0	0	0	0	0	1	1	0	0	1	0	0	0	0	0	0	1	0	0	0	0	0	0	1	0	0	0	1	2	0	1	0	0	0	0	0	8.92316	8.92316	8.92316	9.48344	8.92316	8.92316	8.92316	8.92316	8.92316
chr1:52212203-52215694-	1	0	0	0	0	0	0	1	2	0	0	1	0	2	0	0	1	0	0	0	0	1	2	1	0	0	0	0	0	2	0	0	0	0	2	0	0	0	0	0	9.40746	8.92316	8.92316	8.92316	8.92316	8.92316	8.92316	9.53126	9.90366
chr1:52479238-52490755-	5	8	6	2	10	0	4	4	2	4	2	3	5	6	3	0	1	7	2	3	3	4	3	4	2	4	3	6	13	2	6	7	1	2	1	3	5	1	4	3	10.5055	11.1726	10.8779	9.88598	11.4579	8.92316	10.4879	10.554	9.90366
chr1:52489921-52490755-	0	0	0	1	0	0	1	0	0	0	0	0	0	0	0	0	0	1	0	0	0	0	1	0	1	0	0	0	0	0	0	2	0	0	0	1	0	0	0	0	8.92316	8.92316	8.92316	9.48344	8.92316	8.92316	9.49805	8.92316	8.92316
chr1:52672640-52709755-	0	0	0	0	0	0	0	0	0	0	0	0	0	0	0	0	0	0	0	0	0	0	0	2	0	0	0	0	0	0	0	0	0	0	0	0	0	0	0	0	8.92316	8.92316	8.92316	8.92316	8.92316	8.92316	8.92316	8.92316	8.92316
chr1:52708164-52709755-	16	12	5	3	13	9	13	10	16	8	14	5	10	13	1	5	9	8	11	6	9	12	5	11	8	13	6	9	14	6	10	7	9	7	5	17	8	4	12	5	11.8073	11.6527	10.6874	10.2004	11.7777	11.4887	11.8037	11.5653	12.0582
chr1:52709486-52709755-	0	0	0	0	0	0	0	0	0	0	0	0	0	0	0	0	0	0	0	0	0	0	0	0	0	0	0	0	0	0	0	0	0	0	0	0	1	0	0	2	8.92316	8.92316	8.92316	8.92316	8.92316	8.92316	8.92316	8.92316	8.92316
chr1:52790024-52799536-	0	0	0	0	3	0	0	0	2	0	0	0	0	0	0	0	0	0	0	0	0	0	0	0	0	0	0	0	0	0	0	0	0	0	0	0	0	0	0	0	8.92316	8.92316	8.92316	8.92316	10.2091	8.92316	8.92316	8.92316	9.90366
chr1:53206562-53208085-	0	0	0	0	0	0	0	0	0	0	0	0	0	0	0	0	0	0	0	0	0	1	0	0	1	0	0	0	2	0	0	0	0	0	0	0	0	0	0	0	8.92316	8.92316	8.92316	8.92316	8.92316	8.92316	8.92316	8.92316	8.92316
chr1:53216231-53282092-	0	0	0	0	0	0	0	0	0	0	0	0	0	0	0	0	0	0	0	0	0	0	0	1	0	0	0	0	0	0	2	0	0	0	0	0	0	0	0	0	8.92316	8.92316	8.92316	8.92316	8.92316	8.92316	8.92316	8.92316	8.92316
chr1:53256629-53282092-	8	3	5	9	1	2	2	1	8	1	4	3	6	2	2	5	5	5	4	4	9	7	7	1	7	4	0	0	3	7	1	4	1	3	5	3	8	3	2	4	10.9905	10.191	10.6874	11.3212	9.48822	9.98893	9.90803	9.53126	11.2138
chr1:53256629-53290423-	0	0	1	0	1	0	1	0	0	0	0	0	0	0	0	2	0	0	0	0	1	0	0	0	0	0	0	0	0	0	0	0	0	0	0	0	5	0	0	1	8.92316	8.92316	9.48818	8.92316	9.48822	8.92316	9.49805	8.92316	8.92316
chr1:53275070-53282092-	0	0	0	0	0	0	0	0	0	0	0	0	0	0	0	0	1	1	0	0	0	0	0	2	0	3	1	0	0	0	0	0	0	0	0	0	0	0	0	0	8.92316	8.92316	8.92316	8.92316	8.92316	8.92316	8.92316	8.92316	8.92316
chr1:53319943-53321210+	3	0	0	0	0	0	0	0	0	0	0	0	0	0	0	0	0	0	0	0	0	0	0	0	0	0	0	0	0	0	0	0	0	0	0	0	0	0	0	0	10.0585	8.92316	8.92316	8.92316	8.92316	8.92316	8.92316	8.92316	8.92316
chr1:53865041-53914632-	0	0	0	0	2	0	0	0	0	0	0	0	0	0	0	0	0	0	0	0	4	0	0	1	0	0	0	0	0	0	0	0	0	0	0	0	0	0	0	0	8.92316	8.92316	8.92316	8.92316	9.89321	8.92316	8.92316	8.92316	8.92316
chr1:53885329-53891260-	0	0	0	0	0	0	0	0	0	0	2	0	0	0	2	0	0	0	0	0	0	0	0	0	0	0	0	0	0	0	0	0	0	0	0	0	0	0	0	0	8.92316	8.92316	8.92316	8.92316	8.92316	8.92316	8.92316	8.92316	8.92316
chr1:53885329-53904434-	0	0	0	0	0	2	0	0	0	0	0	0	0	0	0	0	0	0	0	0	0	0	0	0	0	0	0	0	0	0	0	0	0	0	0	0	0	0	0	0	8.92316	8.92316	8.92316	8.92316	8.92316	9.98893	8.92316	8.92316	8.92316
chr1:53904249-53914632-	0	0	0	0	0	0	0	0	1	0	0	0	0	0	0	0	0	0	0	0	0	0	0	0	0	0	0	0	0	0	0	0	0	0	0	0	0	2	0	1	8.92316	8.92316	8.92316	8.92316	8.92316	8.92316	8.92316	8.92316	9.49515
chr1:54428762-54434238-	0	0	0	0	0	0	0	0	0	0	0	0	0	0	0	0	0	3	0	0	0	0	0	0	0	0	0	0	0	0	1	0	0	0	0	0	0	0	0	0	8.92316	8.92316	8.92316	8.92316	8.92316	8.92316	8.92316	8.92316	8.92316
chr1:54530117-54551130-	0	0	0	0	0	0	0	0	0	0	0	0	0	0	0	0	0	0	0	2	0	0	0	0	0	0	0	0	0	0	0	0	0	0	0	0	0	0	0	0	8.92316	8.92316	8.92316	8.92316	8.92316	8.92316	8.92316	8.92316	8.92316
chr1:54651669-54657699-	0	0	0	0	0	0	0	0	0	0	0	0	0	0	0	0	0	0	0	0	0	0	0	0	0	0	0	0	3	0	0	0	0	0	0	0	0	0	0	0	8.92316	8.92316	8.92316	8.92316	8.92316	8.92316	8.92316	8.92316	8.92316
chr1:54723014-54729874-	0	1	0	0	1	0	0	0	0	0	0	0	0	0	0	0	0	0	1	0	0	0	0	0	0	0	1	0	0	0	0	0	0	2	0	0	0	0	0	0	8.92316	9.47834	8.92316	8.92316	9.48822	8.92316	8.92316	8.92316	8.92316
chr1:54723014-54736312-	0	0	0	0	0	0	0	0	0	0	0	0	0	0	0	0	0	0	0	0	0	0	2	0	0	0	0	0	0	0	0	0	0	0	0	0	0	0	0	0	8.92316	8.92316	8.92316	8.92316	8.92316	8.92316	8.92316	8.92316	8.92316
chr1:54723014-54743428-	0	0	0	0	3	0	1	1	0	1	0	0	0	0	0	0	0	0	0	3	0	0	1	0	0	0	0	0	0	0	0	0	0	0	0	0	0	0	0	0	8.92316	8.92316	8.92316	8.92316	10.2091	8.92316	9.49805	9.53126	8.92316
chr1:54792453-54828695-	0	0	0	0	0	0	0	0	0	0	0	0	0	0	0	0	0	0	0	0	0	0	0	0	0	0	0	0	0	0	0	0	0	2	0	0	0	0	0	0	8.92316	8.92316	8.92316	8.92316	8.92316	8.92316	8.92316	8.92316	8.92316
chr1:54997012-54998161-	0	0	0	0	0	0	0	0	0	0	0	0	0	0	0	0	0	0	0	0	0	0	0	0	0	0	0	0	0	0	0	0	0	2	0	0	0	0	0	0	8.92316	8.92316	8.92316	8.92316	8.92316	8.92316	8.92316	8.92316	8.92316
chr1:55003491-55005801-	3	0	0	0	0	0	0	0	0	0	0	0	0	0	0	0	0	0	0	0	0	0	0	0	0	0	0	0	0	0	0	0	0	0	0	0	0	0	0	0	10.0585	8.92316	8.92316	8.92316	8.92316	8.92316	8.92316	8.92316	8.92316
chr1:55061275-55067598+	0	0	0	0	0	0	0	0	0	0	0	0	0	0	0	3	0	0	0	0	0	0	0	0	0	0	1	0	0	0	0	0	0	0	0	0	0	0	0	0	8.92316	8.92316	8.92316	8.92316	8.92316	8.92316	8.92316	8.92316	8.92316
chr1:55144839-55145017+	0	0	0	0	0	0	0	0	0	0	0	0	0	0	0	0	0	3	0	0	0	0	0	0	0	0	0	0	0	0	0	0	0	0	0	0	0	0	0	0	8.92316	8.92316	8.92316	8.92316	8.92316	8.92316	8.92316	8.92316	8.92316
chr1:55178306-55180806-	0	0	0	0	0	0	0	0	0	0	0	0	0	0	0	0	0	0	0	0	0	0	0	0	0	0	0	0	0	0	0	0	2	0	0	0	0	0	0	0	8.92316	8.92316	8.92316	8.92316	8.92316	8.92316	8.92316	8.92316	8.92316
chr1:55204183-55206615-	1	0	0	0	0	0	0	0	1	0	0	0	0	0	0	0	0	2	0	0	0	0	0	0	0	0	1	0	0	2	1	0	0	0	0	3	0	0	0	0	9.40746	8.92316	8.92316	8.92316	8.92316	8.92316	8.92316	8.92316	9.49515
chr1:55340473-55348935-	0	0	0	0	0	0	0	0	0	0	0	0	0	0	0	0	0	0	0	0	0	0	0	0	0	0	0	2	0	0	0	0	0	0	0	0	0	0	0	0	8.92316	8.92316	8.92316	8.92316	8.92316	8.92316	8.92316	8.92316	8.92316
chr1:55695745-55702133+	0	0	0	0	0	0	0	0	0	0	0	0	0	0	0	0	0	0	0	0	0	0	0	0	0	0	0	0	0	0	0	0	0	0	2	0	0	0	0	0	8.92316	8.92316	8.92316	8.92316	8.92316	8.92316	8.92316	8.92316	8.92316
chr1:56831439-56850383-	3	1	2	2	0	1	1	1	0	0	1	0	3	0	0	0	0	0	0	0	1	0	1	0	5	0	0	0	0	1	5	1	2	1	5	0	0	3	4	0	10.0585	9.47834	9.89315	9.88598	8.92316	9.5523	9.49805	9.53126	8.92316
chr1:56831439-56871784-	0	0	0	0	0	0	0	1	0	0	0	0	1	0	0	0	0	0	0	0	1	0	0	0	0	0	0	0	4	0	0	0	0	0	1	0	0	3	0	0	8.92316	8.92316	8.92316	8.92316	8.92316	8.92316	8.92316	9.53126	8.92316
chr1:56831439-56879073-	0	0	0	0	0	0	0	0	0	0	0	0	0	0	0	0	0	0	0	0	0	0	0	0	0	0	0	0	0	0	0	2	0	1	0	0	0	0	0	0	8.92316	8.92316	8.92316	8.92316	8.92316	8.92316	8.92316	8.92316	8.92316
chr1:56831439-56891265-	3	1	3	2	2	1	7	0	0	0	1	1	6	1	0	1	1	2	0	1	1	0	0	0	1	0	0	0	0	0	2	0	2	2	0	0	0	0	4	0	10.0585	9.47834	10.209	9.88598	9.89321	9.5523	11.0695	8.92316	8.92316
chr1:56831439-56899117-	0	0	1	0	0	0	0	0	0	0	1	0	0	0	0	0	0	0	0	0	0	2	0	2	0	0	0	0	0	0	0	1	0	0	0	0	0	0	0	0	8.92316	8.92316	9.48818	8.92316	8.92316	8.92316	8.92316	8.92316	8.92316
chr1:56845576-56845731-	0	0	2	0	0	0	1	0	0	0	0	0	0	0	0	0	0	0	0	0	0	0	0	0	0	0	1	0	0	0	0	0	0	0	0	0	0	0	0	0	8.92316	8.92316	9.89315	8.92316	8.92316	8.92316	9.49805	8.92316	8.92316
chr1:56845576-56850383-	4	1	1	0	1	1	3	0	0	1	1	0	3	0	0	1	0	0	3	1	1	3	0	4	2	0	1	0	3	1	3	1	0	1	3	3	0	0	3	0	10.2992	9.47834	9.48818	8.92316	9.48822	9.5523	10.2269	8.92316	8.92316
chr1:56845576-56891265-	1	1	2	0	0	0	0	0	0	0	2	0	0	2	0	2	1	2	0	0	0	1	0	1	1	0	0	0	1	1	0	0	0	1	0	0	1	0	0	0	9.40746	9.47834	9.89315	8.92316	8.92316	8.92316	8.92316	8.92316	8.92316
chr1:56845576-56899117-	0	1	1	1	1	0	0	0	0	0	0	0	0	0	0	0	0	0	0	0	1	0	0	2	0	0	1	0	0	0	0	2	0	0	0	0	0	0	0	0	8.92316	9.47834	9.48818	9.48344	9.48822	8.92316	8.92316	8.92316	8.92316
chr1:56871312-56871784-	2	0	2	0	2	0	1	0	1	0	0	0	0	0	0	0	0	0	0	0	0	1	0	1	0	0	0	0	1	0	0	0	0	0	0	0	0	0	0	2	9.7694	8.92316	9.89315	8.92316	9.89321	8.92316	9.49805	8.92316	9.49515
chr1:56871312-56891265-	2	0	0	1	0	0	2	0	0	1	0	0	0	0	0	0	0	0	0	0	0	2	1	3	0	0	0	0	1	0	0	0	0	0	0	0	1	0	1	2	9.7694	8.92316	8.92316	9.48344	8.92316	8.92316	9.90803	8.92316	8.92316
chr1:56871312-56899117-	3	0	0	3	0	0	2	0	0	0	0	0	0	0	0	2	0	0	0	0	1	1	1	0	1	0	0	1	1	0	0	0	0	3	0	1	0	0	3	0	10.0585	8.92316	8.92316	10.2004	8.92316	8.92316	9.90803	8.92316	8.92316
chr1:56891163-56948255-	1	0	0	0	0	0	0	1	1	0	1	0	0	2	0	0	0	1	0	0	1	1	0	0	0	0	2	2	5	0	0	2	0	1	1	3	2	0	2	2	9.40746	8.92316	8.92316	8.92316	8.92316	8.92316	8.92316	9.53126	9.49515
chr1:56891163-56974321-	2	0	6	2	0	0	0	0	0	1	1	2	2	1	0	0	0	3	0	0	1	3	0	0	0	1	1	0	0	1	0	0	1	0	0	0	0	0	1	0	9.7694	8.92316	10.8779	9.88598	8.92316	8.92316	8.92316	8.92316	8.92316
chr1:56948079-56948255-	0	0	3	2	0	1	0	0	1	1	0	1	0	1	0	0	0	0	0	0	4	2	1	0	1	0	1	0	0	0	0	0	0	0	0	1	0	0	1	0	8.92316	8.92316	10.209	9.88598	8.92316	9.5523	8.92316	8.92316	9.49515
chr1:56948079-56974321-	6	1	4	1	1	0	1	0	5	2	4	1	4	2	0	0	0	0	1	0	4	0	1	2	0	0	0	0	2	0	0	1	0	1	1	0	1	0	7	5	10.6859	9.47834	10.468	9.48344	9.48822	8.92316	9.49805	8.92316	10.7026
chr1:57900634-57902224+	0	0	0	0	0	0	0	0	0	0	0	0	0	0	0	0	0	0	0	0	0	0	0	0	2	0	0	0	0	0	0	1	0	1	0	0	0	0	0	0	8.92316	8.92316	8.92316	8.92316	8.92316	8.92316	8.92316	8.92316	8.92316
chr1:57900634-57923424+	0	0	0	0	0	0	0	2	0	0	0	0	0	0	0	0	0	0	0	0	0	0	0	0	0	0	0	0	0	0	0	1	0	0	0	0	0	0	0	1	8.92316	8.92316	8.92316	8.92316	8.92316	8.92316	8.92316	9.95773	8.92316
chr1:57946287-57946436+	0	0	0	0	0	2	0	0	0	0	0	0	0	0	0	0	0	0	0	0	0	0	0	0	0	0	0	0	0	0	0	0	0	0	0	0	0	0	0	0	8.92316	8.92316	8.92316	8.92316	8.92316	9.98893	8.92316	8.92316	8.92316
chr1:58405154-58405786+	0	0	0	0	0	0	0	0	0	0	0	0	2	0	0	0	0	0	0	0	0	0	0	0	0	0	0	0	0	0	0	0	0	0	0	0	0	0	0	0	8.92316	8.92316	8.92316	8.92316	8.92316	8.92316	8.92316	8.92316	8.92316
chr1:58414372-58421934-	0	0	0	0	0	0	0	0	0	0	0	0	0	0	0	1	0	0	0	0	0	0	0	0	3	0	0	0	0	0	0	0	0	0	0	0	0	0	0	1	8.92316	8.92316	8.92316	8.92316	8.92316	8.92316	8.92316	8.92316	8.92316
chr1:58417013-58417179-	0	0	0	2	0	0	0	0	0	0	0	0	0	0	0	0	0	0	0	0	0	0	0	0	0	0	0	0	0	0	0	0	0	0	0	0	0	0	0	0	8.92316	8.92316	8.92316	9.88598	8.92316	8.92316	8.92316	8.92316	8.92316
chr1:58417013-58417383-	3	0	2	1	1	0	2	0	2	0	1	0	2	0	0	0	2	0	1	0	4	0	0	0	7	4	1	0	2	1	0	0	0	0	1	0	0	0	2	0	10.0585	8.92316	9.89315	9.48344	9.48822	8.92316	9.90803	8.92316	9.90366
chr1:58419667-58421934-	0	0	0	0	0	0	0	0	0	0	0	0	0	0	0	0	0	0	0	0	0	0	0	0	0	2	0	1	1	0	0	0	0	0	0	0	0	1	0	0	8.92316	8.92316	8.92316	8.92316	8.92316	8.92316	8.92316	8.92316	8.92316
chr1:58422434-58422651-	0	0	0	0	0	0	0	0	0	0	0	0	0	0	0	0	0	0	0	0	3	0	0	0	0	0	0	0	0	0	0	0	0	0	0	0	0	0	0	0	8.92316	8.92316	8.92316	8.92316	8.92316	8.92316	8.92316	8.92316	8.92316
chr1:58472305-58483703-	0	0	0	0	0	0	0	0	0	0	0	0	0	0	0	0	0	0	3	0	0	0	0	0	0	0	0	0	0	0	0	0	0	0	0	0	0	0	0	0	8.92316	8.92316	8.92316	8.92316	8.92316	8.92316	8.92316	8.92316	8.92316
chr1:58476434-58483703-	0	0	0	0	0	0	2	0	0	0	0	0	0	0	0	0	0	0	0	0	0	0	0	0	0	0	0	0	0	0	0	0	0	0	0	0	0	0	0	0	8.92316	8.92316	8.92316	8.92316	8.92316	8.92316	9.90803	8.92316	8.92316
chr1:58480960-58501884-	0	0	0	0	0	0	0	0	0	0	0	0	2	0	0	0	0	0	0	0	0	0	0	0	0	0	0	0	0	0	0	1	0	0	0	0	0	0	0	0	8.92316	8.92316	8.92316	8.92316	8.92316	8.92316	8.92316	8.92316	8.92316
chr1:58480960-58501890-	0	1	0	1	0	0	0	2	0	0	0	0	0	0	0	0	0	0	2	0	0	0	0	0	0	0	0	0	0	0	0	0	0	0	0	0	0	0	0	0	8.92316	9.47834	8.92316	9.48344	8.92316	8.92316	8.92316	9.95773	8.92316
chr1:58492857-58501890-	0	0	0	0	0	0	0	0	0	0	0	0	0	0	0	0	0	0	0	0	0	0	0	0	1	0	0	0	0	0	0	0	0	0	0	0	0	0	0	2	8.92316	8.92316	8.92316	8.92316	8.92316	8.92316	8.92316	8.92316	8.92316
chr1:58493661-58501890-	0	0	0	0	0	0	0	0	0	0	4	0	0	0	0	0	0	0	0	0	0	0	0	0	0	0	0	0	0	0	0	0	0	0	0	0	0	0	1	0	8.92316	8.92316	8.92316	8.92316	8.92316	8.92316	8.92316	8.92316	8.92316
chr1:58726306-58735712+	0	0	0	0	0	0	0	0	0	0	0	0	0	2	0	0	0	0	0	0	0	0	0	0	0	0	0	0	0	0	0	0	0	0	0	0	0	0	0	0	8.92316	8.92316	8.92316	8.92316	8.92316	8.92316	8.92316	8.92316	8.92316
chr1:58726306-58741046+	0	1	0	0	0	1	0	0	0	1	0	0	0	0	0	1	0	0	0	0	1	0	0	1	3	0	0	0	0	0	0	0	2	0	0	0	0	0	0	1	8.92316	9.47834	8.92316	8.92316	8.92316	9.5523	8.92316	8.92316	8.92316
chr1:58754185-58757592+	2	0	0	0	0	0	0	0	0	0	0	0	0	0	0	0	0	0	0	0	0	0	0	0	0	0	0	0	0	0	0	0	0	0	0	0	0	0	0	0	9.7694	8.92316	8.92316	8.92316	8.92316	8.92316	8.92316	8.92316	8.92316
chr1:58823915-58829149+	0	0	0	0	0	0	0	0	0	0	0	0	0	0	0	0	0	0	0	0	0	0	0	0	0	0	0	0	3	0	0	0	0	0	0	0	0	0	0	0	8.92316	8.92316	8.92316	8.92316	8.92316	8.92316	8.92316	8.92316	8.92316
chr1:58823915-58833774+	0	0	0	0	3	0	5	0	2	2	0	1	0	0	2	0	0	0	3	1	4	0	1	2	0	3	0	2	5	0	2	0	2	1	0	1	2	2	1	4	8.92316	8.92316	8.92316	8.92316	10.2091	8.92316	10.7088	8.92316	9.90366
chr1:58911636-58912262-	2	0	0	0	0	0	0	0	0	0	0	0	0	2	0	0	0	0	0	0	0	0	0	0	0	0	0	0	0	0	0	0	0	0	0	0	0	0	0	0	9.7694	8.92316	8.92316	8.92316	8.92316	8.92316	8.92316	8.92316	8.92316
chr1:58976959-58989798+	0	0	0	0	0	0	0	0	0	0	0	0	0	0	0	0	0	0	2	0	0	0	0	1	0	0	0	0	0	0	0	0	0	0	0	0	0	0	0	0	8.92316	8.92316	8.92316	8.92316	8.92316	8.92316	8.92316	8.92316	8.92316
chr1:59191889-59199191-	0	2	0	0	1	0	0	1	0	0	0	0	0	0	0	0	0	0	0	1	0	1	0	1	2	0	0	0	0	0	0	0	0	0	0	0	0	0	0	0	8.92316	9.87826	8.92316	8.92316	9.48822	8.92316	8.92316	9.53126	8.92316
chr1:59642418-59655532-	0	0	1	0	0	0	0	1	2	1	1	1	0	3	0	0	0	0	0	0	0	1	0	0	0	0	0	0	0	1	1	0	2	0	0	1	0	0	0	0	8.92316	8.92316	9.48818	8.92316	8.92316	8.92316	8.92316	9.53126	9.90366
chr1:59690486-59698459+	0	0	0	0	0	0	0	0	0	0	0	0	0	0	0	0	0	0	0	0	2	0	0	0	0	0	0	0	0	0	0	0	0	0	0	0	0	0	0	0	8.92316	8.92316	8.92316	8.92316	8.92316	8.92316	8.92316	8.92316	8.92316
chr1:59695978-59700949+	0	0	0	0	0	0	0	0	0	0	0	0	0	0	0	0	0	0	0	0	0	0	0	0	0	0	0	0	0	0	2	0	0	0	0	0	0	0	0	0	8.92316	8.92316	8.92316	8.92316	8.92316	8.92316	8.92316	8.92316	8.92316
chr1:59695978-59702947+	0	1	0	0	0	0	0	0	0	0	0	0	0	0	0	0	0	0	0	0	0	0	0	0	0	0	0	0	0	0	0	0	0	0	0	0	0	0	2	0	8.92316	9.47834	8.92316	8.92316	8.92316	8.92316	8.92316	8.92316	8.92316
chr1:59813588-59815411+	0	0	0	0	0	0	0	0	2	0	0	0	0	0	0	0	0	2	0	0	0	0	0	0	0	2	0	0	0	0	0	1	1	1	0	0	3	0	0	0	8.92316	8.92316	8.92316	8.92316	8.92316	8.92316	8.92316	8.92316	9.90366
chr1:59813588-59852441+	0	0	0	0	0	0	0	0	0	0	0	0	0	0	0	0	0	2	0	0	0	0	0	0	0	0	0	0	0	0	0	0	0	0	0	0	0	0	0	0	8.92316	8.92316	8.92316	8.92316	8.92316	8.92316	8.92316	8.92316	8.92316
chr1:59868439-59870316+	0	0	0	0	0	0	0	0	0	0	0	0	0	0	0	0	0	0	0	0	0	0	0	0	0	0	0	2	0	0	0	0	0	0	0	0	0	0	0	0	8.92316	8.92316	8.92316	8.92316	8.92316	8.92316	8.92316	8.92316	8.92316
chr1:59949053-59958435+	2	0	0	0	0	0	0	0	0	0	1	0	0	0	0	0	0	0	1	0	0	1	0	0	0	0	0	0	0	0	0	0	0	0	0	0	0	0	0	0	9.7694	8.92316	8.92316	8.92316	8.92316	8.92316	8.92316	8.92316	8.92316
chr1:59949053-59982308+	0	0	2	0	0	0	0	0	0	0	0	0	0	0	0	0	0	0	0	0	0	0	0	0	0	0	0	0	0	0	0	0	0	0	0	0	0	0	0	0	8.92316	8.92316	9.89315	8.92316	8.92316	8.92316	8.92316	8.92316	8.92316
chr1:60136264-60139343+	0	0	0	0	0	0	0	0	0	0	0	0	0	0	0	0	0	0	0	1	0	0	0	0	0	0	0	2	0	0	0	0	2	0	0	0	0	0	2	0	8.92316	8.92316	8.92316	8.92316	8.92316	8.92316	8.92316	8.92316	8.92316
chr1:60194504-60195176+	0	1	0	0	0	0	0	0	0	0	0	0	0	0	2	0	0	0	0	1	0	0	0	0	0	0	0	0	0	0	0	3	0	0	0	0	1	0	0	0	8.92316	9.47834	8.92316	8.92316	8.92316	8.92316	8.92316	8.92316	8.92316
chr1:60194504-60206416+	0	0	0	0	0	0	0	1	0	2	1	0	0	0	0	1	0	0	3	0	0	1	0	1	0	0	2	0	0	0	0	0	0	0	0	0	0	0	3	3	8.92316	8.92316	8.92316	8.92316	8.92316	8.92316	8.92316	9.53126	8.92316
chr1:60224625-60230685+	0	0	0	0	0	0	1	0	0	3	0	0	0	0	0	0	0	1	0	0	0	0	0	0	0	0	0	0	0	0	0	0	0	0	0	2	0	0	2	0	8.92316	8.92316	8.92316	8.92316	8.92316	8.92316	9.49805	8.92316	8.92316
chr1:60224625-60237216+	0	0	0	0	0	0	0	0	0	0	0	0	0	0	0	2	0	0	0	0	0	0	0	0	0	0	0	0	0	0	0	0	0	0	0	0	0	0	0	0	8.92316	8.92316	8.92316	8.92316	8.92316	8.92316	8.92316	8.92316	8.92316
chr1:60238572-60244883+	0	0	0	0	0	0	0	0	0	0	0	0	0	0	0	0	0	0	0	0	0	0	0	0	0	0	0	0	0	0	0	0	0	0	0	0	0	0	4	0	8.92316	8.92316	8.92316	8.92316	8.92316	8.92316	8.92316	8.92316	8.92316
chr1:60253352-60279800+	0	0	0	0	0	0	0	0	0	0	2	0	0	0	0	0	0	0	0	0	0	0	0	0	0	0	0	0	0	0	0	0	0	0	0	0	0	0	0	0	8.92316	8.92316	8.92316	8.92316	8.92316	8.92316	8.92316	8.92316	8.92316
chr1:60264279-60305364+	0	0	0	0	0	0	0	0	0	0	0	0	0	0	0	0	0	0	0	0	0	0	0	0	0	0	0	0	0	0	0	0	0	0	0	0	0	0	3	0	8.92316	8.92316	8.92316	8.92316	8.92316	8.92316	8.92316	8.92316	8.92316
chr1:60267759-60312245+	0	0	0	0	0	0	0	0	0	0	0	3	0	0	0	0	0	0	0	0	0	0	0	0	0	0	0	0	0	0	0	1	0	0	0	0	0	0	0	0	8.92316	8.92316	8.92316	8.92316	8.92316	8.92316	8.92316	8.92316	8.92316
chr1:60287311-60295995+	0	2	0	0	0	0	0	0	0	0	0	0	0	0	0	0	0	0	0	0	0	0	0	0	0	0	0	0	0	0	0	0	0	0	0	0	0	0	0	0	8.92316	9.87826	8.92316	8.92316	8.92316	8.92316	8.92316	8.92316	8.92316
chr1:60451269-60451448-	0	0	0	0	0	0	0	0	0	0	0	0	0	0	0	0	0	0	0	0	0	0	0	0	0	0	0	0	0	0	0	0	0	0	0	2	0	0	0	0	8.92316	8.92316	8.92316	8.92316	8.92316	8.92316	8.92316	8.92316	8.92316
chr1:60477012-60477397+	0	0	0	2	0	0	0	0	0	0	0	0	0	0	0	0	0	0	0	0	0	0	0	0	0	0	0	0	0	0	0	0	0	0	0	0	0	0	0	0	8.92316	8.92316	8.92316	9.88598	8.92316	8.92316	8.92316	8.92316	8.92316
chr1:60518980-60527489-	0	2	0	0	1	0	0	0	0	0	0	0	0	0	0	0	0	0	0	0	1	0	0	0	0	0	0	0	0	1	0	0	0	0	0	0	1	0	0	0	8.92316	9.87826	8.92316	8.92316	9.48822	8.92316	8.92316	8.92316	8.92316
chr1:60525592-60527489-	0	0	0	0	0	0	0	0	0	0	0	0	0	0	0	0	0	0	0	0	0	0	0	0	0	2	0	0	1	0	0	0	0	0	0	0	0	0	5	0	8.92316	8.92316	8.92316	8.92316	8.92316	8.92316	8.92316	8.92316	8.92316
chr1:60546559-60546746-	0	0	0	0	0	0	0	0	0	0	0	0	0	0	0	0	0	0	0	0	0	0	0	0	0	0	0	0	0	0	0	0	0	0	0	0	0	2	0	0	8.92316	8.92316	8.92316	8.92316	8.92316	8.92316	8.92316	8.92316	8.92316
chr1:60704376-60704701+	0	0	0	0	0	0	0	0	0	0	0	0	0	0	0	0	0	0	0	0	0	0	0	0	0	0	0	0	0	0	0	0	0	0	0	0	0	3	0	0	8.92316	8.92316	8.92316	8.92316	8.92316	8.92316	8.92316	8.92316	8.92316
chr1:61681057-61681252+	0	0	0	0	0	0	0	0	0	0	0	0	0	0	0	0	0	0	0	0	0	0	0	0	0	0	2	0	0	0	0	0	0	0	0	0	0	0	0	0	8.92316	8.92316	8.92316	8.92316	8.92316	8.92316	8.92316	8.92316	8.92316
chr1:61767948-61849594+	0	0	0	0	0	0	0	0	0	0	0	2	0	0	0	0	0	0	0	0	0	0	0	0	0	0	0	0	0	0	0	0	0	0	0	0	0	0	0	0	8.92316	8.92316	8.92316	8.92316	8.92316	8.92316	8.92316	8.92316	8.92316
chr1:61804261-61811633+	0	0	0	0	0	0	0	0	0	0	0	0	0	0	0	0	0	0	0	0	0	0	0	0	0	2	0	0	0	0	0	0	0	0	0	0	0	0	0	0	8.92316	8.92316	8.92316	8.92316	8.92316	8.92316	8.92316	8.92316	8.92316
chr1:61901917-61902229+	0	0	0	0	0	0	0	0	0	0	0	4	0	0	0	0	0	0	0	0	0	0	0	0	0	0	0	0	0	0	0	0	0	0	0	0	0	0	0	0	8.92316	8.92316	8.92316	8.92316	8.92316	8.92316	8.92316	8.92316	8.92316
chr1:61924697-61931386+	0	0	0	0	0	0	0	0	0	0	0	0	0	0	0	0	0	0	0	0	0	0	0	2	0	0	0	0	0	0	0	0	0	0	0	0	0	0	0	0	8.92316	8.92316	8.92316	8.92316	8.92316	8.92316	8.92316	8.92316	8.92316
chr1:62010307-62076494+	0	2	0	0	0	1	0	0	0	2	0	0	2	0	0	0	0	0	0	0	0	0	1	0	0	2	0	0	1	0	0	0	0	0	0	0	0	0	0	0	8.92316	9.87826	8.92316	8.92316	8.92316	9.5523	8.92316	8.92316	8.92316
chr1:62028970-62065350+	0	0	0	0	0	0	0	0	0	0	0	0	0	0	2	0	0	0	0	0	0	0	0	0	0	0	0	0	0	0	0	0	0	0	0	0	0	0	0	0	8.92316	8.92316	8.92316	8.92316	8.92316	8.92316	8.92316	8.92316	8.92316
chr1:62211534-62275927+	0	0	0	0	0	0	0	0	0	0	0	0	0	0	0	0	0	0	0	0	0	0	0	0	0	0	0	0	0	0	0	0	0	0	0	2	0	0	0	0	8.92316	8.92316	8.92316	8.92316	8.92316	8.92316	8.92316	8.92316	8.92316
chr1:62216423-62238952+	0	0	0	0	1	1	0	0	0	0	1	0	0	0	1	0	0	0	0	0	0	1	0	0	0	6	0	0	0	0	0	0	0	0	0	0	0	0	0	0	8.92316	8.92316	8.92316	8.92316	9.48822	9.5523	8.92316	8.92316	8.92316
chr1:62479499-62532780+	0	0	0	0	0	0	0	0	0	0	0	0	0	0	0	0	0	0	0	0	0	2	0	0	0	0	0	0	0	0	0	0	0	0	0	0	0	0	0	0	8.92316	8.92316	8.92316	8.92316	8.92316	8.92316	8.92316	8.92316	8.92316
chr1:62512305-62512645+	0	0	0	0	0	0	0	0	0	0	0	0	0	0	0	0	0	0	0	0	0	2	0	0	0	0	0	0	0	0	0	0	0	0	0	0	0	0	0	0	8.92316	8.92316	8.92316	8.92316	8.92316	8.92316	8.92316	8.92316	8.92316
chr1:62704025-62738320+	0	0	0	0	0	0	0	0	0	0	0	0	0	0	0	0	0	0	0	0	0	0	0	0	2	0	0	0	0	0	0	0	0	0	0	0	0	0	0	0	8.92316	8.92316	8.92316	8.92316	8.92316	8.92316	8.92316	8.92316	8.92316
chr1:62718945-62762804+	0	0	0	0	0	0	0	0	0	0	0	0	0	0	0	0	0	0	0	0	0	0	0	0	0	0	0	0	0	0	0	0	0	0	0	0	2	0	0	0	8.92316	8.92316	8.92316	8.92316	8.92316	8.92316	8.92316	8.92316	8.92316
chr1:62738289-62749288+	0	1	0	0	2	0	0	0	0	0	0	0	0	0	0	0	0	0	0	0	0	0	0	0	0	0	0	0	0	0	0	1	0	0	0	0	0	0	0	0	8.92316	9.47834	8.92316	8.92316	9.89321	8.92316	8.92316	8.92316	8.92316
chr1:62760775-62771845+	0	0	0	0	0	0	0	0	0	0	0	0	0	0	3	0	0	0	0	0	0	0	0	0	0	0	0	0	0	0	0	0	0	0	0	0	0	0	0	0	8.92316	8.92316	8.92316	8.92316	8.92316	8.92316	8.92316	8.92316	8.92316
chr1:62783294-62786301+	0	0	0	0	0	0	0	0	0	0	0	0	0	0	0	0	0	2	0	0	0	0	0	0	0	0	0	0	0	0	0	0	0	0	0	0	0	0	0	0	8.92316	8.92316	8.92316	8.92316	8.92316	8.92316	8.92316	8.92316	8.92316
chr1:63051532-63051814-	0	0	0	0	0	0	0	0	0	0	0	0	0	0	0	2	0	3	0	0	0	0	0	0	0	0	0	0	0	0	0	0	0	0	0	0	0	0	0	0	8.92316	8.92316	8.92316	8.92316	8.92316	8.92316	8.92316	8.92316	8.92316
chr1:63058775-63061097-	0	0	0	0	0	0	0	0	0	0	0	0	0	0	0	0	0	0	0	0	2	0	0	0	0	0	0	0	0	0	0	0	0	0	0	0	0	0	0	0	8.92316	8.92316	8.92316	8.92316	8.92316	8.92316	8.92316	8.92316	8.92316
chr1:63074322-63079061-	0	0	0	0	0	0	0	0	0	0	0	0	0	0	0	0	0	0	0	0	0	0	0	0	0	0	0	2	0	0	0	0	0	0	0	0	0	0	0	0	8.92316	8.92316	8.92316	8.92316	8.92316	8.92316	8.92316	8.92316	8.92316
chr1:63078953-63086398-	0	0	0	0	0	0	0	1	0	1	0	0	1	0	0	2	2	0	0	0	0	0	0	0	0	0	0	0	0	0	0	0	0	0	0	0	0	0	0	0	8.92316	8.92316	8.92316	8.92316	8.92316	8.92316	8.92316	9.53126	8.92316
chr1:63078953-63105759-	0	0	0	0	0	0	0	0	0	0	0	0	0	0	0	0	0	1	0	0	0	0	0	0	0	0	1	3	0	0	0	1	0	0	0	0	0	0	0	1	8.92316	8.92316	8.92316	8.92316	8.92316	8.92316	8.92316	8.92316	8.92316
chr1:63085668-63086398-	0	1	0	1	0	0	0	0	1	0	0	3	2	0	0	0	0	1	0	0	1	0	0	0	0	0	0	0	2	0	0	1	0	1	0	1	0	0	1	0	8.92316	9.47834	8.92316	9.48344	8.92316	8.92316	8.92316	8.92316	9.49515
chr1:63085668-63093730-	0	4	0	0	0	0	0	0	0	0	0	0	1	0	1	0	0	0	0	0	0	0	0	0	0	2	0	0	0	0	0	0	0	0	0	0	0	0	0	0	8.92316	10.4479	8.92316	8.92316	8.92316	8.92316	8.92316	8.92316	8.92316
chr1:63085668-63105759-	1	0	0	0	0	2	1	0	0	1	0	0	0	0	0	1	1	0	0	0	0	1	0	0	0	0	0	0	1	0	0	0	0	0	0	0	0	2	0	0	9.40746	8.92316	8.92316	8.92316	8.92316	9.98893	9.49805	8.92316	8.92316
chr1:63093285-63093730-	0	0	0	0	0	0	0	0	0	0	0	0	0	0	0	0	0	0	0	0	2	0	0	0	0	0	1	0	0	0	0	0	0	0	0	0	0	0	0	0	8.92316	8.92316	8.92316	8.92316	8.92316	8.92316	8.92316	8.92316	8.92316
chr1:63093285-63105759-	0	0	0	0	3	2	0	0	0	0	0	0	0	0	0	0	1	0	0	0	0	0	0	0	1	0	0	0	0	2	0	0	0	0	0	0	0	0	0	1	8.92316	8.92316	8.92316	8.92316	10.2091	9.98893	8.92316	8.92316	8.92316
chr1:63148396-63148571-	0	0	0	0	3	0	0	0	0	0	0	7	0	0	0	0	0	0	0	0	0	0	0	0	0	0	0	0	1	0	0	0	0	0	0	0	0	0	0	0	8.92316	8.92316	8.92316	8.92316	10.2091	8.92316	8.92316	8.92316	8.92316
chr1:63152775-63170914-	0	0	0	0	0	0	0	0	0	0	0	1	0	2	0	0	0	0	0	0	0	0	0	0	0	0	0	0	0	0	0	0	0	0	0	0	0	0	0	0	8.92316	8.92316	8.92316	8.92316	8.92316	8.92316	8.92316	8.92316	8.92316
chr1:63543119-63546500+	0	0	0	0	0	0	0	0	0	0	0	0	0	0	0	0	0	0	0	0	0	0	0	0	0	0	0	0	0	0	1	0	1	0	0	0	0	0	0	2	8.92316	8.92316	8.92316	8.92316	8.92316	8.92316	8.92316	8.92316	8.92316
chr1:63735959-63736357+	0	0	0	0	0	2	0	0	0	0	0	0	0	0	0	0	0	0	0	0	0	0	0	0	0	0	0	0	0	0	0	0	0	0	0	0	0	0	0	0	8.92316	8.92316	8.92316	8.92316	8.92316	9.98893	8.92316	8.92316	8.92316
chr1:64078707-64079334-	0	0	3	0	0	0	0	0	0	1	2	0	0	1	0	1	2	0	0	1	0	0	0	0	0	1	0	0	3	0	0	0	0	0	1	0	0	0	1	0	8.92316	8.92316	10.209	8.92316	8.92316	8.92316	8.92316	8.92316	8.92316
chr1:64550849-64576329+	2	0	2	0	3	0	2	0	1	0	1	0	1	2	0	1	3	1	1	4	1	0	2	1	1	2	0	1	2	0	0	0	1	1	1	3	3	0	0	4	9.7694	8.92316	9.89315	8.92316	10.2091	8.92316	9.90803	8.92316	9.49515
chr1:64558503-64576329+	0	0	0	0	1	0	0	1	0	3	0	0	0	0	0	0	2	0	0	1	0	0	0	0	0	0	0	0	0	0	0	0	0	0	0	0	0	0	0	0	8.92316	8.92316	8.92316	8.92316	9.48822	8.92316	8.92316	9.53126	8.92316
chr1:64566217-64576329+	1	0	0	0	0	0	0	0	1	0	0	0	0	0	0	0	0	1	1	0	0	2	0	0	0	0	0	0	1	0	0	1	0	0	0	0	0	0	0	0	9.40746	8.92316	8.92316	8.92316	8.92316	8.92316	8.92316	8.92316	9.49515
chr1:64700969-64721789+	0	0	0	0	0	0	0	0	0	0	0	0	0	0	0	0	0	0	0	0	0	0	0	0	0	0	0	0	0	0	0	0	0	2	0	0	0	0	0	0	8.92316	8.92316	8.92316	8.92316	8.92316	8.92316	8.92316	8.92316	8.92316
chr1:64735368-64735766-	0	0	0	0	0	0	0	0	1	0	0	2	0	0	0	0	0	0	0	0	0	0	0	0	0	0	0	0	0	0	0	0	0	0	0	0	0	0	0	0	8.92316	8.92316	8.92316	8.92316	8.92316	8.92316	8.92316	8.92316	9.49515
chr1:65190319-65205678+	2	0	2	2	0	1	0	0	0	1	0	0	1	0	0	0	0	0	0	2	2	4	0	0	0	0	0	0	0	1	0	0	0	0	0	2	0	0	1	0	9.7694	8.92316	9.89315	9.88598	8.92316	9.5523	8.92316	8.92316	8.92316
chr1:65190602-65191993+	0	0	0	0	0	0	0	0	0	0	0	0	0	0	0	0	0	0	0	0	0	0	0	0	0	0	0	2	0	0	0	0	0	0	0	0	0	0	0	0	8.92316	8.92316	8.92316	8.92316	8.92316	8.92316	8.92316	8.92316	8.92316
chr1:65195656-65196783+	0	0	0	0	0	0	0	0	0	0	0	0	0	0	0	0	0	0	0	1	0	0	0	0	2	0	0	0	0	0	0	0	0	0	0	0	0	0	0	0	8.92316	8.92316	8.92316	8.92316	8.92316	8.92316	8.92316	8.92316	8.92316
chr1:65233730-65238542+	0	0	0	0	0	0	0	0	0	0	0	0	0	0	0	0	0	2	0	0	0	0	0	0	0	0	0	0	0	0	0	0	0	0	0	0	0	0	0	0	8.92316	8.92316	8.92316	8.92316	8.92316	8.92316	8.92316	8.92316	8.92316
chr1:65255522-65265346+	0	0	0	0	0	0	0	0	0	0	0	0	0	0	0	0	0	0	0	0	0	0	0	0	0	0	0	0	0	0	0	0	0	0	0	2	0	0	0	0	8.92316	8.92316	8.92316	8.92316	8.92316	8.92316	8.92316	8.92316	8.92316
chr1:65262880-65265926+	0	0	0	0	0	0	0	0	0	0	0	0	0	0	0	0	0	0	0	0	0	0	0	0	0	2	0	0	0	0	0	1	0	0	0	0	0	0	0	0	8.92316	8.92316	8.92316	8.92316	8.92316	8.92316	8.92316	8.92316	8.92316
chr1:66521455-66530853+	0	0	0	0	0	0	0	0	0	0	0	0	0	0	0	0	0	0	0	0	0	0	0	0	0	0	0	0	0	0	3	0	1	0	0	0	0	0	0	0	8.92316	8.92316	8.92316	8.92316	8.92316	8.92316	8.92316	8.92316	8.92316
chr1:66735637-66802168-	0	0	0	0	0	0	0	0	0	0	1	0	0	0	0	0	0	0	0	0	0	0	0	0	0	0	0	0	0	0	0	0	0	2	0	0	0	0	0	0	8.92316	8.92316	8.92316	8.92316	8.92316	8.92316	8.92316	8.92316	8.92316
chr1:66762048-66802168-	0	2	0	0	0	0	0	0	1	0	1	3	0	1	0	0	0	0	0	0	1	0	0	1	0	1	3	0	0	1	0	0	2	2	0	0	1	0	0	1	8.92316	9.87826	8.92316	8.92316	8.92316	8.92316	8.92316	8.92316	9.49515
chr1:66762048-66807604-	4	0	0	1	0	0	1	0	3	0	0	0	2	0	3	3	3	3	0	0	1	0	1	0	2	1	0	3	1	1	0	1	0	3	0	0	0	0	0	0	10.2992	8.92316	8.92316	9.48344	8.92316	8.92316	9.49805	8.92316	10.2217
chr1:66772906-66802168-	4	1	5	2	0	2	4	1	2	7	1	1	1	6	2	1	3	6	1	3	2	1	3	1	2	6	7	1	2	3	1	2	0	1	2	0	2	0	0	6	10.2992	9.47834	10.6874	9.88598	8.92316	9.98893	10.4879	9.53126	9.90366
chr1:66772906-66807604-	0	0	0	0	1	1	1	1	1	2	0	2	0	0	0	2	3	0	0	1	1	1	0	2	1	1	0	1	1	0	0	1	3	1	0	0	2	0	6	2	8.92316	8.92316	8.92316	8.92316	9.48822	9.5523	9.49805	9.53126	9.49515
chr1:66777967-66802168-	2	0	0	0	0	0	0	0	0	0	0	0	0	0	0	0	0	0	0	0	0	1	0	0	0	0	0	0	0	0	0	0	0	0	0	0	0	0	0	0	9.7694	8.92316	8.92316	8.92316	8.92316	8.92316	8.92316	8.92316	8.92316
chr1:66789976-66802168-	0	0	0	0	0	0	0	0	0	0	0	0	0	0	0	0	0	0	0	0	0	0	2	0	2	0	0	0	0	0	0	0	0	0	0	0	0	0	0	0	8.92316	8.92316	8.92316	8.92316	8.92316	8.92316	8.92316	8.92316	8.92316
chr1:66801049-66802168-	2	8	0	0	3	1	1	3	1	3	2	3	0	1	1	0	3	6	3	1	2	6	5	3	8	3	3	5	4	2	2	4	2	1	2	1	2	11	2	2	9.7694	11.1726	8.92316	8.92316	10.2091	9.5523	9.49805	10.2865	9.49515
chr1:66801049-66807604-	1	1	0	0	1	2	3	0	0	0	0	0	3	0	3	1	0	7	1	3	0	1	1	3	5	2	1	0	7	3	4	5	1	7	3	0	0	3	0	0	9.40746	9.47834	8.92316	8.92316	9.48822	9.98893	10.2269	8.92316	8.92316
chr1:69570493-69578047-	0	0	0	1	0	0	0	0	0	0	2	0	0	1	0	0	0	0	0	0	0	0	1	0	0	0	0	0	0	0	0	0	0	0	0	1	1	0	0	0	8.92316	8.92316	8.92316	9.48344	8.92316	8.92316	8.92316	8.92316	8.92316
chr1:69683210-69684172-	0	0	0	0	0	0	0	0	0	0	0	0	0	0	0	0	0	0	0	0	0	0	0	0	0	0	0	0	0	0	0	0	0	0	0	0	0	0	2	0	8.92316	8.92316	8.92316	8.92316	8.92316	8.92316	8.92316	8.92316	8.92316
chr1:71046678-71075480-	0	0	1	0	0	0	1	0	0	0	0	0	0	0	0	0	0	2	0	0	0	0	0	0	0	0	2	1	0	0	0	0	0	0	0	0	0	0	0	0	8.92316	8.92316	9.48818	8.92316	8.92316	8.92316	9.49805	8.92316	8.92316
chr1:71046678-71089527-	0	0	0	2	0	0	0	0	1	0	0	0	0	0	0	0	0	0	0	1	0	0	1	0	1	0	0	0	0	1	1	0	0	0	0	0	0	0	0	0	8.92316	8.92316	8.92316	9.88598	8.92316	8.92316	8.92316	8.92316	9.49515
chr1:71065479-71089527-	0	0	0	0	0	0	0	0	0	0	0	0	3	0	0	0	0	0	0	0	0	0	0	0	0	2	0	0	1	0	0	0	0	0	0	0	0	1	0	0	8.92316	8.92316	8.92316	8.92316	8.92316	8.92316	8.92316	8.92316	8.92316
chr1:71074543-71089527-	0	0	0	0	1	0	0	0	0	1	0	0	0	0	0	0	0	0	0	0	0	0	0	1	0	0	4	0	0	1	0	0	0	0	0	0	0	0	0	0	8.92316	8.92316	8.92316	8.92316	9.48822	8.92316	8.92316	8.92316	8.92316
chr1:71075037-71075239-	2	0	0	0	0	0	0	0	0	0	0	0	0	0	0	0	0	0	0	0	0	0	0	0	0	0	0	0	0	0	0	0	0	0	0	0	0	0	0	0	9.7694	8.92316	8.92316	8.92316	8.92316	8.92316	8.92316	8.92316	8.92316
chr1:71604970-71612650-	0	0	0	0	0	0	0	1	0	0	3	0	0	0	3	0	0	1	0	0	0	0	0	0	0	0	0	0	0	0	0	0	0	0	0	0	0	0	0	0	8.92316	8.92316	8.92316	8.92316	8.92316	8.92316	8.92316	9.53126	8.92316
chr1:71612468-71618665-	0	0	0	0	0	0	0	0	0	0	0	0	0	0	0	0	0	0	0	0	0	0	0	0	0	2	0	0	0	0	0	0	0	0	0	0	0	0	0	0	8.92316	8.92316	8.92316	8.92316	8.92316	8.92316	8.92316	8.92316	8.92316
chr1:71641152-71651649-	0	0	0	0	0	0	0	0	0	0	0	0	0	0	0	0	0	0	0	0	0	0	0	0	0	0	0	0	0	0	1	0	2	0	0	0	0	0	0	0	8.92316	8.92316	8.92316	8.92316	8.92316	8.92316	8.92316	8.92316	8.92316
chr1:72381619-72383769+	3	0	0	0	0	0	0	0	0	0	0	0	0	0	0	0	0	0	0	0	2	0	0	0	0	0	0	0	0	0	1	0	1	0	1	0	0	0	0	0	10.0585	8.92316	8.92316	8.92316	8.92316	8.92316	8.92316	8.92316	8.92316
chr1:73952512-73953036-	0	0	0	0	0	0	0	0	0	0	2	0	0	0	0	0	0	0	0	0	0	0	0	0	0	0	0	0	0	0	0	0	0	0	0	0	0	0	0	0	8.92316	8.92316	8.92316	8.92316	8.92316	8.92316	8.92316	8.92316	8.92316
chr1:73980914-73985778-	0	0	0	0	0	0	0	0	0	0	0	0	0	0	0	0	0	0	0	0	0	2	0	0	0	0	0	0	0	0	0	0	0	0	0	0	0	0	0	0	8.92316	8.92316	8.92316	8.92316	8.92316	8.92316	8.92316	8.92316	8.92316
chr1:73980914-73997104-	0	0	0	0	0	0	0	0	0	1	1	1	0	4	0	0	0	0	0	0	3	2	0	0	0	0	0	0	0	2	0	0	0	0	2	0	0	0	2	0	8.92316	8.92316	8.92316	8.92316	8.92316	8.92316	8.92316	8.92316	8.92316
chr1:73985747-73992174-	0	0	0	0	0	0	0	0	0	0	0	0	0	0	0	0	0	0	0	0	0	0	0	0	2	0	0	0	0	0	0	0	0	0	0	0	0	0	0	0	8.92316	8.92316	8.92316	8.92316	8.92316	8.92316	8.92316	8.92316	8.92316
chr1:74265839-74266240+	0	0	0	0	0	0	0	0	0	0	0	0	0	0	0	0	0	0	0	0	0	0	0	0	0	2	0	1	0	0	0	0	0	0	0	0	0	0	0	0	8.92316	8.92316	8.92316	8.92316	8.92316	8.92316	8.92316	8.92316	8.92316
chr1:74288663-74289248-	0	0	0	0	0	0	0	0	0	0	0	0	0	0	0	0	0	0	0	0	0	0	0	0	0	0	0	0	0	0	0	0	0	0	0	0	0	2	0	0	8.92316	8.92316	8.92316	8.92316	8.92316	8.92316	8.92316	8.92316	8.92316
chr1:74290752-74291734-	0	0	0	0	0	0	0	0	0	0	0	0	0	0	0	0	0	0	0	0	0	0	0	2	1	0	0	0	0	0	0	0	0	0	1	0	0	0	0	0	8.92316	8.92316	8.92316	8.92316	8.92316	8.92316	8.92316	8.92316	8.92316
chr1:74427591-74432431+	0	0	0	0	0	0	0	0	0	0	0	0	0	0	0	0	0	0	0	0	0	0	0	0	0	0	0	0	2	0	0	0	0	0	0	0	0	0	0	0	8.92316	8.92316	8.92316	8.92316	8.92316	8.92316	8.92316	8.92316	8.92316
chr1:74436986-74437273-	0	0	0	0	0	0	0	0	0	0	0	0	0	0	0	0	0	0	0	0	0	0	0	0	0	3	0	1	0	0	0	0	0	0	0	0	0	0	0	1	8.92316	8.92316	8.92316	8.92316	8.92316	8.92316	8.92316	8.92316	8.92316
chr1:74450495-74461730-	0	0	0	0	0	0	3	0	0	0	0	0	2	0	0	0	0	0	0	0	0	0	0	0	0	0	0	0	0	0	0	0	0	0	0	0	0	0	0	0	8.92316	8.92316	8.92316	8.92316	8.92316	8.92316	10.2269	8.92316	8.92316
chr1:74466915-74479749-	0	0	0	0	0	0	0	0	0	0	0	0	0	0	0	0	0	0	0	0	0	0	0	0	0	0	0	0	0	2	0	0	0	0	0	0	0	0	0	0	8.92316	8.92316	8.92316	8.92316	8.92316	8.92316	8.92316	8.92316	8.92316
chr1:74663115-74663429+	0	0	0	0	0	0	0	0	0	0	0	0	0	0	0	0	0	0	0	0	0	0	0	0	0	0	0	0	0	0	0	0	0	0	0	2	0	0	0	0	8.92316	8.92316	8.92316	8.92316	8.92316	8.92316	8.92316	8.92316	8.92316
chr1:74731919-74737629+	0	0	0	0	0	0	0	0	0	0	0	0	0	0	0	0	0	0	0	0	0	0	2	0	0	0	0	0	0	0	0	0	0	0	0	0	0	0	0	0	8.92316	8.92316	8.92316	8.92316	8.92316	8.92316	8.92316	8.92316	8.92316
chr1:74967500-74968912-	0	0	0	0	0	0	0	0	0	2	0	0	0	0	0	0	0	0	0	0	0	0	0	1	0	3	0	0	0	0	0	0	0	0	0	0	0	0	0	0	8.92316	8.92316	8.92316	8.92316	8.92316	8.92316	8.92316	8.92316	8.92316
chr1:74977244-74978068+	0	0	0	0	0	0	0	0	0	0	0	0	0	0	0	0	0	0	0	0	0	0	0	2	0	0	0	0	0	0	0	0	0	0	0	0	0	0	0	0	8.92316	8.92316	8.92316	8.92316	8.92316	8.92316	8.92316	8.92316	8.92316
chr1:75143369-75145103+	0	0	0	0	0	0	0	0	0	0	0	0	0	0	0	0	2	0	0	0	0	0	0	0	0	0	0	0	0	0	0	0	0	0	0	0	0	0	0	0	8.92316	8.92316	8.92316	8.92316	8.92316	8.92316	8.92316	8.92316	8.92316
chr1:75240892-75241479+	0	0	0	0	0	0	0	0	0	0	0	3	0	0	0	0	0	0	0	0	0	0	0	0	0	0	0	0	0	0	0	0	0	0	0	0	0	0	0	0	8.92316	8.92316	8.92316	8.92316	8.92316	8.92316	8.92316	8.92316	8.92316
chr1:75240915-75244825+	0	0	0	0	0	0	0	0	0	0	0	0	0	0	0	0	0	0	0	0	0	0	0	2	0	0	0	0	0	0	0	0	0	0	0	0	0	0	0	0	8.92316	8.92316	8.92316	8.92316	8.92316	8.92316	8.92316	8.92316	8.92316
chr1:75242670-75244892+	0	0	3	2	0	1	0	0	0	0	0	1	0	0	0	0	0	1	1	1	3	0	0	0	0	0	0	0	0	0	0	1	0	0	0	0	0	3	0	0	8.92316	8.92316	10.209	9.88598	8.92316	9.5523	8.92316	8.92316	8.92316
chr1:75362168-75362408+	0	0	0	1	0	0	0	0	0	1	0	2	0	0	0	0	0	0	0	0	0	3	0	1	0	0	0	0	0	0	0	0	0	0	0	0	0	0	0	0	8.92316	8.92316	8.92316	9.48344	8.92316	8.92316	8.92316	8.92316	8.92316
chr1:77398494-77401324-	0	0	1	0	0	0	0	0	0	0	0	0	0	0	1	0	0	0	0	0	1	0	0	0	0	0	0	1	1	0	0	0	0	0	0	0	3	0	0	0	8.92316	8.92316	9.48818	8.92316	8.92316	8.92316	8.92316	8.92316	8.92316
chr1:78327227-78327398+	0	0	0	0	0	0	0	0	0	0	0	0	0	0	0	0	0	0	0	0	0	0	0	2	0	0	0	0	0	0	0	0	0	0	0	0	0	0	0	0	8.92316	8.92316	8.92316	8.92316	8.92316	8.92316	8.92316	8.92316	8.92316
chr1:78357080-78357302+	0	0	0	0	0	0	0	0	0	0	0	0	0	0	0	0	0	0	0	0	0	0	0	0	0	0	0	0	0	0	0	0	0	0	0	0	0	0	2	0	8.92316	8.92316	8.92316	8.92316	8.92316	8.92316	8.92316	8.92316	8.92316
chr1:78360071-78360229+	1	0	1	0	0	0	0	0	0	0	0	0	0	1	0	0	0	0	0	0	0	0	0	0	0	0	0	0	0	0	0	0	0	0	0	0	0	0	3	0	9.40746	8.92316	9.48818	8.92316	8.92316	8.92316	8.92316	8.92316	8.92316
chr1:78360071-78393448+	0	0	0	0	0	1	0	1	0	0	0	1	0	0	0	0	0	0	0	0	0	0	0	0	0	0	0	0	0	0	0	1	0	0	0	0	0	0	0	2	8.92316	8.92316	8.92316	8.92316	8.92316	9.5523	8.92316	9.53126	8.92316
chr1:78425193-78472634-	2	0	1	0	0	0	0	0	0	0	0	0	0	0	0	0	0	0	0	0	0	0	0	0	0	0	0	0	0	1	0	0	0	0	0	0	0	0	0	0	9.7694	8.92316	9.48818	8.92316	8.92316	8.92316	8.92316	8.92316	8.92316
chr1:78443635-78472634-	0	0	0	0	0	0	0	0	1	1	0	0	0	0	0	0	0	0	0	0	0	1	2	0	0	0	0	0	0	2	0	0	1	0	0	0	0	0	0	0	8.92316	8.92316	8.92316	8.92316	8.92316	8.92316	8.92316	8.92316	9.49515
chr1:78443635-78482363-	1	3	0	0	1	0	1	0	0	0	0	0	0	0	0	0	0	0	0	0	0	0	0	0	0	0	0	0	0	0	0	0	0	0	0	0	0	0	2	0	9.40746	10.191	8.92316	8.92316	9.48822	8.92316	9.49805	8.92316	8.92316
chr1:78454754-78482363-	0	0	0	0	0	0	0	0	0	0	0	0	0	0	0	0	0	0	0	0	0	0	0	0	0	0	0	0	0	0	0	2	0	0	0	0	0	0	0	0	8.92316	8.92316	8.92316	8.92316	8.92316	8.92316	8.92316	8.92316	8.92316
chr1:78466967-78471191-	0	0	0	0	1	0	0	0	0	0	0	0	0	0	0	0	0	0	3	0	0	0	0	0	0	0	0	0	0	0	0	0	0	0	0	0	0	0	0	0	8.92316	8.92316	8.92316	8.92316	9.48822	8.92316	8.92316	8.92316	8.92316
chr1:78466967-78472634-	0	0	0	2	0	0	0	0	0	0	0	0	1	0	0	0	0	0	0	0	0	1	0	0	0	0	0	0	0	0	0	0	0	0	0	0	0	0	0	0	8.92316	8.92316	8.92316	9.88598	8.92316	8.92316	8.92316	8.92316	8.92316
chr1:78466967-78476305-	0	0	0	1	0	0	0	0	0	0	0	0	1	0	0	0	1	3	1	0	0	0	0	0	1	0	0	0	1	0	0	0	0	1	1	0	0	0	0	0	8.92316	8.92316	8.92316	9.48344	8.92316	8.92316	8.92316	8.92316	8.92316
chr1:78471083-78472634-	0	0	0	0	0	0	0	0	0	0	0	0	0	0	0	0	0	0	0	0	0	0	0	0	0	0	0	0	0	0	0	0	0	0	0	0	0	0	0	2	8.92316	8.92316	8.92316	8.92316	8.92316	8.92316	8.92316	8.92316	8.92316
chr1:78681593-78682010+	0	0	0	2	0	0	0	0	0	0	0	0	0	0	0	0	0	0	0	1	0	0	1	0	0	0	0	0	0	0	0	0	0	1	0	3	0	0	0	0	8.92316	8.92316	8.92316	9.88598	8.92316	8.92316	8.92316	8.92316	8.92316
chr1:78681593-78690378+	0	0	0	0	0	0	0	0	0	0	0	0	0	0	0	0	0	0	0	0	0	0	0	0	0	0	0	0	0	0	0	0	2	0	0	0	0	0	0	0	8.92316	8.92316	8.92316	8.92316	8.92316	8.92316	8.92316	8.92316	8.92316
chr1:78681593-78705391+	0	0	0	0	1	0	0	0	0	0	1	0	0	1	0	0	0	1	0	0	1	0	0	1	0	0	0	0	0	0	0	3	0	2	0	1	0	0	0	0	8.92316	8.92316	8.92316	8.92316	9.48822	8.92316	8.92316	8.92316	8.92316
chr1:78694196-78696204+	0	0	0	0	0	0	0	0	0	0	0	0	0	0	0	0	0	0	0	0	0	0	0	0	0	0	0	0	0	0	0	0	0	0	0	2	0	0	0	0	8.92316	8.92316	8.92316	8.92316	8.92316	8.92316	8.92316	8.92316	8.92316
chr1:78701269-78705391+	0	0	0	0	0	0	0	0	0	0	0	0	0	0	0	0	0	0	0	0	0	0	0	0	0	0	0	0	0	0	0	0	0	0	0	0	3	0	0	0	8.92316	8.92316	8.92316	8.92316	8.92316	8.92316	8.92316	8.92316	8.92316
chr1:78999286-79002715+	0	0	0	0	0	0	0	0	3	0	0	0	0	0	0	0	0	0	0	0	0	0	0	0	0	0	0	0	0	0	0	0	0	0	0	0	0	0	0	0	8.92316	8.92316	8.92316	8.92316	8.92316	8.92316	8.92316	8.92316	10.2217
chr1:79602829-79603005-	0	0	0	0	0	0	0	0	0	0	0	0	0	0	0	0	0	0	0	0	0	0	0	0	0	0	0	0	0	0	0	0	0	2	0	0	0	0	0	0	8.92316	8.92316	8.92316	8.92316	8.92316	8.92316	8.92316	8.92316	8.92316
chr1:79623682-79625285-	0	0	0	0	0	0	4	0	1	0	0	0	0	0	0	3	4	0	2	0	0	0	0	0	1	0	0	0	0	1	0	0	0	0	2	1	1	0	2	0	8.92316	8.92316	8.92316	8.92316	8.92316	8.92316	10.4879	8.92316	9.49515
chr1:80283676-80287127-	0	0	0	0	0	0	0	0	0	0	0	0	0	0	0	0	0	0	0	0	0	0	0	0	0	0	0	0	0	0	0	0	0	0	0	2	0	0	0	0	8.92316	8.92316	8.92316	8.92316	8.92316	8.92316	8.92316	8.92316	8.92316
chr1:80304080-80323056-	0	0	0	2	0	0	0	1	0	0	0	0	0	0	1	0	0	0	0	0	1	0	0	0	0	1	0	1	0	0	1	0	1	0	0	0	0	0	2	0	8.92316	8.92316	8.92316	9.88598	8.92316	8.92316	8.92316	9.53126	8.92316
chr1:80321785-80323056-	0	0	0	0	0	0	0	1	0	0	0	0	0	0	0	0	0	0	0	1	0	0	1	0	0	0	0	0	0	0	0	0	0	0	0	3	0	0	2	0	8.92316	8.92316	8.92316	8.92316	8.92316	8.92316	8.92316	9.53126	8.92316
chr1:80549133-80564571-	0	0	0	0	0	2	0	0	0	0	0	0	0	0	0	0	0	0	0	0	0	0	0	0	0	0	0	0	0	0	0	0	1	0	0	0	0	0	0	0	8.92316	8.92316	8.92316	8.92316	8.92316	9.98893	8.92316	8.92316	8.92316
chr1:80605791-80606625-	0	0	0	0	0	0	2	0	0	2	0	0	0	0	0	1	1	0	0	1	0	0	0	0	0	1	0	0	0	0	2	0	0	0	0	1	0	0	0	0	8.92316	8.92316	8.92316	8.92316	8.92316	8.92316	9.90803	8.92316	8.92316
chr1:82340319-82342862+	1	0	0	0	0	0	0	0	0	0	0	2	0	0	0	0	0	1	0	0	1	0	1	1	1	4	2	0	0	1	1	0	0	0	0	0	0	0	0	1	9.40746	8.92316	8.92316	8.92316	8.92316	8.92316	8.92316	8.92316	8.92316
chr1:82727228-82731282+	0	0	0	0	0	0	1	0	0	0	1	0	0	2	0	1	0	0	0	0	0	0	0	0	0	1	0	0	0	0	0	0	0	0	0	0	0	0	0	0	8.92316	8.92316	8.92316	8.92316	8.92316	8.92316	9.49805	8.92316	8.92316
chr1:82858356-82895647+	0	0	0	0	0	0	0	0	0	0	0	0	0	0	0	0	0	0	0	0	0	0	0	0	0	0	4	1	0	1	0	0	0	0	0	0	0	0	0	0	8.92316	8.92316	8.92316	8.92316	8.92316	8.92316	8.92316	8.92316	8.92316
chr1:82875288-82876324+	0	3	0	1	0	0	0	0	0	0	0	0	0	0	0	0	0	0	0	0	0	0	0	0	0	0	0	0	0	0	0	0	0	0	0	0	0	0	0	0	8.92316	10.191	8.92316	9.48344	8.92316	8.92316	8.92316	8.92316	8.92316
chr1:82882228-82886467+	0	0	0	0	0	0	0	0	0	0	0	0	0	0	0	0	0	0	0	0	0	0	0	0	0	2	0	0	0	0	0	0	0	0	0	0	0	0	0	0	8.92316	8.92316	8.92316	8.92316	8.92316	8.92316	8.92316	8.92316	8.92316
chr1:82893506-82895277+	0	0	0	0	0	0	0	0	0	0	0	0	2	0	0	0	0	0	0	0	0	0	0	0	0	0	0	0	0	0	0	0	0	0	0	0	0	0	0	0	8.92316	8.92316	8.92316	8.92316	8.92316	8.92316	8.92316	8.92316	8.92316
chr1:84737922-84738133-	0	0	0	0	0	0	0	0	0	0	0	0	0	0	0	0	0	0	0	0	0	0	0	0	0	0	0	0	0	0	0	0	0	0	0	0	0	0	2	0	8.92316	8.92316	8.92316	8.92316	8.92316	8.92316	8.92316	8.92316	8.92316
chr1:84738678-84739656-	0	0	0	0	0	0	0	0	0	0	0	0	0	0	0	0	0	0	0	0	0	0	0	0	1	0	0	0	0	0	0	0	0	2	0	0	0	0	0	0	8.92316	8.92316	8.92316	8.92316	8.92316	8.92316	8.92316	8.92316	8.92316
chr1:84743094-84747329-	0	0	0	2	0	0	0	0	0	0	0	0	0	0	0	1	0	0	3	1	0	0	0	0	0	0	0	0	0	0	0	0	0	1	0	0	0	0	0	0	8.92316	8.92316	8.92316	9.88598	8.92316	8.92316	8.92316	8.92316	8.92316
chr1:84758974-84777507-	2	0	0	0	0	0	0	0	0	0	0	0	0	0	0	0	0	0	0	0	0	0	0	0	0	0	0	0	0	0	0	0	0	0	0	0	0	0	0	0	9.7694	8.92316	8.92316	8.92316	8.92316	8.92316	8.92316	8.92316	8.92316
chr1:84765980-84777507-	0	0	0	0	0	0	2	0	0	0	0	0	0	0	0	0	0	0	0	0	0	0	0	0	0	0	0	0	0	0	0	0	0	0	0	0	0	0	0	0	8.92316	8.92316	8.92316	8.92316	8.92316	8.92316	9.90803	8.92316	8.92316
chr1:84776317-84786196-	0	1	2	2	0	0	0	0	0	0	0	0	0	0	0	0	0	0	0	1	0	1	0	0	0	1	1	0	0	1	0	0	0	0	0	2	0	0	0	0	8.92316	9.47834	9.89315	9.88598	8.92316	8.92316	8.92316	8.92316	8.92316
chr1:84776317-84794327-	0	0	3	1	0	0	0	0	2	1	2	1	2	0	3	1	3	0	1	0	1	4	1	1	1	0	2	0	0	2	0	1	1	2	0	2	0	0	1	1	8.92316	8.92316	10.209	9.48344	8.92316	8.92316	8.92316	8.92316	9.90366
chr1:84776317-84795815-	0	0	0	0	0	0	2	0	0	0	0	0	0	0	0	0	0	0	0	0	0	0	0	0	0	0	0	0	0	0	0	0	0	0	0	0	0	0	0	0	8.92316	8.92316	8.92316	8.92316	8.92316	8.92316	9.90803	8.92316	8.92316
chr1:84776317-84814969-	0	0	0	0	0	0	0	0	0	0	0	0	0	0	0	0	0	2	0	0	0	0	0	0	0	0	0	0	0	1	0	0	0	0	0	0	0	0	0	0	8.92316	8.92316	8.92316	8.92316	8.92316	8.92316	8.92316	8.92316	8.92316
chr1:84782827-84794327-	0	2	0	4	0	0	0	0	1	0	0	0	0	0	0	0	0	0	0	2	0	0	0	0	0	0	0	1	0	0	0	0	0	0	0	0	0	0	0	1	8.92316	9.87826	8.92316	10.4583	8.92316	8.92316	8.92316	8.92316	9.49515
chr1:84782827-84814969-	0	0	2	0	0	0	0	0	0	1	1	2	0	0	0	1	0	0	0	0	0	0	0	0	0	1	0	0	0	0	0	0	0	1	1	0	2	1	0	0	8.92316	8.92316	9.89315	8.92316	8.92316	8.92316	8.92316	8.92316	8.92316
chr1:84793525-84814969-	0	1	0	1	1	0	0	1	1	1	1	0	0	0	0	0	0	0	0	1	0	1	0	0	0	0	0	1	0	0	1	0	0	0	0	0	0	0	3	0	8.92316	9.47834	8.92316	9.48344	9.48822	8.92316	8.92316	9.53126	9.49515
chr1:85673625-85699749+	0	0	0	0	0	0	0	0	0	0	0	0	0	0	0	0	0	0	0	0	0	0	0	0	0	0	0	0	2	0	0	0	0	0	0	0	0	0	0	0	8.92316	8.92316	8.92316	8.92316	8.92316	8.92316	8.92316	8.92316	8.92316
chr1:85694259-85701443+	0	0	0	0	0	0	0	0	0	0	3	0	0	0	0	0	0	0	0	0	0	0	0	0	0	0	0	0	0	0	0	0	0	0	0	0	0	0	0	0	8.92316	8.92316	8.92316	8.92316	8.92316	8.92316	8.92316	8.92316	8.92316
chr1:85850800-85851378+	0	0	0	0	0	0	0	0	0	0	0	0	0	0	0	0	0	0	0	0	0	0	0	0	0	2	0	0	0	0	0	0	0	0	0	0	0	0	0	0	8.92316	8.92316	8.92316	8.92316	8.92316	8.92316	8.92316	8.92316	8.92316
chr1:86078568-86090190+	0	0	0	0	0	0	0	0	0	1	0	0	1	0	0	1	1	2	1	1	0	0	0	0	0	2	0	1	2	0	0	0	0	0	0	0	0	0	0	0	8.92316	8.92316	8.92316	8.92316	8.92316	8.92316	8.92316	8.92316	8.92316
chr1:86078568-86094340+	2	0	0	0	0	0	0	0	0	0	1	1	0	2	0	0	1	0	0	0	0	0	0	1	0	0	0	0	0	0	0	0	0	0	0	0	0	0	0	0	9.7694	8.92316	8.92316	8.92316	8.92316	8.92316	8.92316	8.92316	8.92316
chr1:86126456-86133784+	0	0	0	0	0	0	0	0	0	0	0	0	0	0	0	0	0	0	0	0	0	2	0	0	0	0	0	0	0	0	0	0	0	0	0	0	0	0	0	0	8.92316	8.92316	8.92316	8.92316	8.92316	8.92316	8.92316	8.92316	8.92316
chr1:86305262-86305474+	0	0	0	1	0	0	0	0	0	0	1	0	0	0	0	0	0	0	0	0	0	0	0	0	0	0	0	0	0	0	0	1	2	0	0	0	0	0	0	0	8.92316	8.92316	8.92316	9.48344	8.92316	8.92316	8.92316	8.92316	8.92316
chr1:86305304-86305663+	0	0	0	0	0	0	0	0	0	0	0	0	0	0	0	0	0	0	0	0	0	0	0	0	0	0	0	0	0	1	2	0	1	0	0	0	0	2	0	0	8.92316	8.92316	8.92316	8.92316	8.92316	8.92316	8.92316	8.92316	8.92316
chr1:86306899-86307127+	0	0	0	1	0	0	0	0	0	0	2	0	0	1	0	0	0	0	0	0	0	0	0	0	0	1	0	0	0	0	1	0	0	0	0	0	0	0	0	0	8.92316	8.92316	8.92316	9.48344	8.92316	8.92316	8.92316	8.92316	8.92316
chr1:86812488-86878576+	0	0	0	0	0	0	0	0	0	0	0	0	0	0	0	0	0	0	0	0	3	0	0	0	0	0	0	0	0	0	0	0	0	0	0	0	0	0	0	0	8.92316	8.92316	8.92316	8.92316	8.92316	8.92316	8.92316	8.92316	8.92316
chr1:86854360-86857374+	1	0	0	0	0	0	0	0	0	0	0	0	0	0	0	0	0	0	0	0	0	0	0	0	0	0	1	0	0	0	0	0	0	2	0	0	0	0	0	0	9.40746	8.92316	8.92316	8.92316	8.92316	8.92316	8.92316	8.92316	8.92316
chr1:87334270-87365279+	0	1	0	0	1	0	0	0	0	0	0	0	0	0	0	0	0	0	1	0	0	0	0	0	0	0	0	0	0	0	0	0	0	2	0	0	0	0	0	0	8.92316	9.47834	8.92316	8.92316	9.48822	8.92316	8.92316	8.92316	8.92316
chr1:87364104-87374111+	0	1	0	0	0	0	0	0	0	0	0	0	0	0	0	0	0	0	3	2	0	0	0	0	1	0	0	1	2	0	0	0	0	0	0	0	0	5	0	1	8.92316	9.47834	8.92316	8.92316	8.92316	8.92316	8.92316	8.92316	8.92316
chr1:87364104-87380008+	16	12	11	12	12	3	11	3	14	6	12	6	11	5	1	6	6	12	7	12	16	14	13	13	16	8	12	6	15	9	4	6	5	12	6	2	8	6	6	1	11.8073	11.6527	11.5724	11.6662	11.6788	10.3237	11.5979	10.2865	11.8889
chr1:87364104-87403846+	0	1	0	1	2	0	0	0	0	0	1	0	0	0	0	0	0	0	1	0	1	0	0	0	0	0	0	0	0	0	0	0	0	0	0	0	0	0	0	0	8.92316	9.47834	8.92316	9.48344	9.89321	8.92316	8.92316	8.92316	8.92316
chr1:87364104-87425226+	0	0	2	1	0	0	0	0	0	0	0	0	0	0	0	0	0	0	0	0	0	0	0	0	0	0	0	0	0	0	0	0	0	0	0	0	0	0	0	0	8.92316	8.92316	9.89315	9.48344	8.92316	8.92316	8.92316	8.92316	8.92316
chr1:87364104-87436891+	0	0	1	2	0	0	0	0	0	0	0	0	0	0	0	0	0	0	0	0	0	0	0	0	0	0	0	0	0	0	0	0	0	2	0	0	0	0	0	0	8.92316	8.92316	9.48818	9.88598	8.92316	8.92316	8.92316	8.92316	8.92316
chr1:87366292-87366500+	0	0	0	0	0	0	1	0	0	0	0	1	0	2	0	0	0	0	0	0	0	0	0	0	0	0	0	0	0	0	0	0	0	0	0	0	0	0	0	1	8.92316	8.92316	8.92316	8.92316	8.92316	8.92316	9.49805	8.92316	8.92316
chr1:87373997-87403846+	0	0	0	0	0	0	0	0	0	0	0	0	0	0	0	0	2	0	0	0	0	0	0	0	0	0	0	0	0	0	0	0	0	0	0	0	0	0	0	0	8.92316	8.92316	8.92316	8.92316	8.92316	8.92316	8.92316	8.92316	8.92316
chr1:87378972-87380008+	0	0	0	0	0	0	0	0	0	0	0	0	0	0	0	0	0	0	0	0	0	0	0	0	0	0	0	0	0	0	0	0	0	0	0	2	0	0	0	0	8.92316	8.92316	8.92316	8.92316	8.92316	8.92316	8.92316	8.92316	8.92316
chr1:87443675-87446434+	0	0	0	0	0	0	0	0	0	0	0	0	0	0	0	0	0	0	0	0	0	0	0	0	0	0	0	0	0	0	0	0	0	0	2	0	0	0	0	0	8.92316	8.92316	8.92316	8.92316	8.92316	8.92316	8.92316	8.92316	8.92316
chr1:87760051-87774231+	0	0	0	0	0	0	0	0	0	0	0	0	0	0	0	0	0	0	0	0	0	2	0	0	0	0	0	0	0	0	0	0	0	0	0	0	0	3	0	0	8.92316	8.92316	8.92316	8.92316	8.92316	8.92316	8.92316	8.92316	8.92316
chr1:87880368-87881939+	0	2	0	4	0	0	1	1	1	1	0	3	1	4	1	0	3	4	0	1	2	0	2	0	1	1	1	1	2	2	1	1	0	0	1	0	0	0	2	6	8.92316	9.87826	8.92316	10.4583	8.92316	8.92316	9.49805	9.53126	9.49515
chr1:87881859-87917994+	0	0	0	0	0	0	0	0	0	0	0	0	0	0	0	0	0	0	0	0	0	0	0	0	0	0	0	0	0	0	0	0	0	3	0	0	0	0	0	0	8.92316	8.92316	8.92316	8.92316	8.92316	8.92316	8.92316	8.92316	8.92316
chr1:87915100-87918686+	0	0	0	0	0	0	0	0	0	0	0	0	0	0	0	0	0	0	0	0	0	0	0	0	0	0	0	0	0	0	0	0	0	0	0	0	0	0	0	2	8.92316	8.92316	8.92316	8.92316	8.92316	8.92316	8.92316	8.92316	8.92316
chr1:87915100-87921681+	2	0	0	0	0	0	0	0	0	0	0	0	0	0	0	0	0	0	0	0	3	2	0	0	4	0	0	0	0	0	0	0	0	0	0	0	0	0	0	0	9.7694	8.92316	8.92316	8.92316	8.92316	8.92316	8.92316	8.92316	8.92316
chr1:87915492-87940306+	0	0	0	2	0	0	0	0	0	0	0	0	0	0	0	0	0	0	0	0	0	0	0	0	0	0	0	0	0	0	0	0	0	0	0	0	0	0	0	0	8.92316	8.92316	8.92316	9.88598	8.92316	8.92316	8.92316	8.92316	8.92316
chr1:87942799-87943123-	0	0	0	0	0	0	0	0	0	0	1	0	0	3	0	0	0	0	0	0	0	0	0	0	0	0	0	0	0	0	0	0	0	0	0	0	0	0	0	0	8.92316	8.92316	8.92316	8.92316	8.92316	8.92316	8.92316	8.92316	8.92316
chr1:88104159-88104362+	0	0	0	0	0	0	0	0	0	0	0	0	0	0	0	0	0	0	0	0	0	0	0	0	0	0	0	0	0	0	0	2	0	0	0	0	0	0	0	0	8.92316	8.92316	8.92316	8.92316	8.92316	8.92316	8.92316	8.92316	8.92316
chr1:88106941-88139331+	2	0	0	0	0	0	0	0	0	0	0	0	0	0	0	0	0	0	0	0	0	0	0	0	0	0	0	0	0	0	0	0	0	0	0	0	1	0	1	1	9.7694	8.92316	8.92316	8.92316	8.92316	8.92316	8.92316	8.92316	8.92316
chr1:88113733-88114005+	0	0	0	0	0	0	0	0	2	0	0	0	0	0	0	0	0	0	0	0	0	0	0	0	0	0	0	0	0	0	0	0	0	0	0	0	0	0	0	0	8.92316	8.92316	8.92316	8.92316	8.92316	8.92316	8.92316	8.92316	9.90366
chr1:88136077-88139331+	0	0	0	1	2	0	1	0	1	0	0	0	0	0	0	0	0	0	0	0	2	0	0	0	0	0	0	0	0	0	0	0	0	0	1	0	0	1	0	0	8.92316	8.92316	8.92316	9.48344	9.89321	8.92316	9.49805	8.92316	9.49515
chr1:88138473-88139331+	0	0	0	3	0	0	0	0	2	0	0	0	0	0	0	0	0	0	1	0	0	0	0	0	0	0	0	0	0	0	0	0	0	0	0	0	0	0	0	0	8.92316	8.92316	8.92316	10.2004	8.92316	8.92316	8.92316	8.92316	9.90366
chr1:89137559-89145906+	0	0	0	0	0	0	0	0	1	0	0	0	2	0	0	0	0	0	0	0	0	0	0	0	0	0	0	0	0	0	0	0	0	0	0	0	0	0	0	0	8.92316	8.92316	8.92316	8.92316	8.92316	8.92316	8.92316	8.92316	9.49515
chr1:89506796-89507283+	0	0	0	0	0	0	0	0	0	0	0	0	0	0	0	0	0	0	0	0	0	0	0	0	0	0	0	0	0	0	0	0	0	0	2	0	0	0	0	0	8.92316	8.92316	8.92316	8.92316	8.92316	8.92316	8.92316	8.92316	8.92316
chr1:89604598-89634294+	2	0	1	0	0	0	0	0	0	0	0	0	2	0	0	0	0	1	0	0	1	0	0	0	0	0	1	0	0	0	2	0	0	3	0	0	0	0	0	0	9.7694	8.92316	9.48818	8.92316	8.92316	8.92316	8.92316	8.92316	8.92316
chr1:89604598-89671271+	0	0	2	0	0	0	1	0	0	0	0	0	0	0	0	0	0	0	0	0	0	0	0	0	0	0	0	0	0	0	0	0	0	0	1	0	0	0	0	0	8.92316	8.92316	9.89315	8.92316	8.92316	8.92316	9.49805	8.92316	8.92316
chr1:89627761-89634294+	4	1	2	0	0	0	0	0	2	0	1	0	0	0	0	1	0	0	0	0	2	1	1	0	2	0	1	1	3	0	0	1	3	0	0	0	0	0	0	0	10.2992	9.47834	9.89315	8.92316	8.92316	8.92316	8.92316	8.92316	9.90366
chr1:89663661-89671271+	0	0	2	0	2	1	2	0	0	5	3	1	1	4	0	0	1	0	5	2	0	1	1	1	0	0	2	0	0	0	0	0	0	1	0	0	0	3	0	1	8.92316	8.92316	9.89315	8.92316	9.89321	9.5523	9.90803	8.92316	8.92316
chr1:89762230-89789324+	0	0	0	0	0	0	0	0	0	0	0	0	0	0	0	0	0	0	2	1	0	0	0	0	0	0	0	0	0	0	0	0	0	0	0	0	0	0	0	0	8.92316	8.92316	8.92316	8.92316	8.92316	8.92316	8.92316	8.92316	8.92316
chr1:89766306-89789324+	0	0	0	0	0	1	2	0	0	1	0	0	0	0	0	0	0	0	0	0	1	0	0	0	0	0	0	0	0	0	0	0	1	0	0	0	0	0	0	0	8.92316	8.92316	8.92316	8.92316	8.92316	9.5523	9.90803	8.92316	8.92316
chr1:89789163-89789324+	0	0	0	0	0	0	0	0	0	0	0	0	0	0	0	0	0	0	0	0	0	0	0	0	0	0	0	1	2	0	0	0	0	0	0	0	0	0	0	0	8.92316	8.92316	8.92316	8.92316	8.92316	8.92316	8.92316	8.92316	8.92316
chr1:89834434-89843243+	1	1	0	1	0	0	0	0	1	0	2	0	2	0	0	1	1	0	0	0	0	0	1	0	1	0	0	1	0	0	0	0	0	0	0	0	0	0	0	0	9.40746	9.47834	8.92316	9.48344	8.92316	8.92316	8.92316	8.92316	9.49515
chr1:90214276-90214491+	0	0	0	0	0	0	0	0	0	0	0	0	0	0	0	0	0	0	2	0	0	0	0	0	0	0	0	0	0	0	0	0	0	0	0	0	0	0	0	0	8.92316	8.92316	8.92316	8.92316	8.92316	8.92316	8.92316	8.92316	8.92316
chr1:90767522-90778873-	0	0	2	0	0	0	0	0	0	0	0	0	0	0	0	0	0	0	0	0	0	0	0	0	0	0	0	0	0	0	0	0	0	0	0	0	0	0	0	0	8.92316	8.92316	9.89315	8.92316	8.92316	8.92316	8.92316	8.92316	8.92316
chr1:91000400-91000606+	0	0	0	0	0	0	0	0	0	0	0	0	0	0	0	0	0	2	0	0	0	0	0	0	0	0	0	0	0	0	0	0	0	0	0	0	0	0	0	0	8.92316	8.92316	8.92316	8.92316	8.92316	8.92316	8.92316	8.92316	8.92316
chr1:91100577-91105152+	0	0	0	0	0	0	2	0	0	0	1	0	0	0	0	0	0	0	0	0	0	0	0	0	0	0	0	0	0	0	0	0	0	0	0	0	0	0	0	0	8.92316	8.92316	8.92316	8.92316	8.92316	8.92316	9.90803	8.92316	8.92316
chr1:91376318-91381972-	0	2	0	0	0	0	0	1	0	1	0	0	0	0	0	0	0	0	0	0	0	0	0	1	1	1	0	0	0	0	2	0	2	0	0	0	0	0	0	0	8.92316	9.87826	8.92316	8.92316	8.92316	8.92316	8.92316	9.53126	8.92316
chr1:91384565-91385346-	3	0	0	2	1	1	4	1	0	2	1	1	3	0	3	0	0	0	1	1	3	5	2	0	3	1	4	1	0	4	0	0	0	1	0	3	4	1	0	4	10.0585	8.92316	8.92316	9.88598	9.48822	9.5523	10.4879	9.53126	8.92316
chr1:91384565-91391197-	0	0	0	0	0	0	0	0	0	0	0	0	0	0	0	0	0	0	0	0	0	2	0	0	0	0	0	0	0	0	0	0	0	0	0	0	0	0	0	0	8.92316	8.92316	8.92316	8.92316	8.92316	8.92316	8.92316	8.92316	8.92316
chr1:91387215-91388464-	0	0	0	0	0	0	0	0	0	0	0	0	2	0	0	0	0	0	0	0	0	0	0	0	0	0	0	0	0	0	0	0	0	0	0	0	0	0	0	0	8.92316	8.92316	8.92316	8.92316	8.92316	8.92316	8.92316	8.92316	8.92316
chr1:91417165-91420992-	0	0	0	0	0	0	0	0	0	0	0	0	0	0	0	1	2	0	0	0	0	0	0	0	0	0	0	0	0	0	0	0	0	1	0	0	0	0	0	0	8.92316	8.92316	8.92316	8.92316	8.92316	8.92316	8.92316	8.92316	8.92316
chr1:91435914-91436887-	0	0	0	0	0	0	0	0	0	0	0	0	0	0	0	0	0	0	0	0	0	0	0	2	0	0	0	0	0	0	0	0	0	0	0	0	0	0	0	0	8.92316	8.92316	8.92316	8.92316	8.92316	8.92316	8.92316	8.92316	8.92316
chr1:92117471-92148494-	0	0	0	1	0	0	0	0	0	0	0	0	0	0	0	0	0	0	0	0	0	0	0	0	0	0	0	1	2	0	0	0	0	0	0	0	0	0	1	0	8.92316	8.92316	8.92316	9.48344	8.92316	8.92316	8.92316	8.92316	8.92316
chr1:92140159-92148494-	0	0	0	0	0	0	0	0	1	0	0	0	0	0	0	0	0	0	0	0	2	0	0	0	0	0	0	0	0	0	0	0	0	0	0	0	0	0	0	0	8.92316	8.92316	8.92316	8.92316	8.92316	8.92316	8.92316	8.92316	9.49515
chr1:92141520-92148494-	1	0	0	0	0	1	0	0	1	0	1	0	0	1	1	0	0	0	0	0	1	0	0	2	0	0	1	1	0	0	0	0	0	1	0	0	0	0	0	0	9.40746	8.92316	8.92316	8.92316	8.92316	9.5523	8.92316	8.92316	9.49515
chr1:92147180-92148494-	0	0	0	0	0	0	0	0	2	0	0	0	0	0	0	0	0	0	0	0	0	0	0	0	0	0	0	0	0	0	0	0	0	0	0	0	0	0	0	0	8.92316	8.92316	8.92316	8.92316	8.92316	8.92316	8.92316	8.92316	9.90366
chr1:92148256-92148494-	4	1	0	1	0	0	0	0	0	0	0	0	0	0	0	0	0	0	0	0	1	0	0	0	0	2	0	0	2	0	0	1	0	0	0	0	2	0	0	1	10.2992	9.47834	8.92316	9.48344	8.92316	8.92316	8.92316	8.92316	8.92316
chr1:92460380-92470985-	0	0	0	0	0	0	0	0	0	0	0	0	4	0	0	0	0	0	0	0	0	0	0	0	0	0	0	0	0	0	0	0	0	0	0	0	0	0	0	0	8.92316	8.92316	8.92316	8.92316	8.92316	8.92316	8.92316	8.92316	8.92316
chr1:92467381-92470985-	0	0	0	0	0	0	0	0	1	0	0	0	0	0	0	0	0	0	0	0	1	2	0	0	0	0	0	0	0	0	0	0	0	0	0	0	0	0	0	0	8.92316	8.92316	8.92316	8.92316	8.92316	8.92316	8.92316	8.92316	9.49515
chr1:92963659-92973399+	0	0	4	0	0	0	0	0	0	0	0	0	0	0	0	0	0	0	0	0	0	0	0	0	0	0	0	0	0	0	0	0	0	0	0	0	0	0	0	0	8.92316	8.92316	10.468	8.92316	8.92316	8.92316	8.92316	8.92316	8.92316
chr1:93284686-93285001+	0	0	0	0	0	0	0	0	0	0	0	0	0	0	0	0	0	0	0	0	0	0	0	0	0	0	0	0	0	0	0	0	0	0	0	2	0	0	0	0	8.92316	8.92316	8.92316	8.92316	8.92316	8.92316	8.92316	8.92316	8.92316
chr1:93367263-93367426+	0	0	0	0	0	0	0	2	0	0	0	0	0	0	0	0	0	0	0	0	0	0	0	0	0	0	0	0	0	0	0	0	0	0	0	0	0	0	0	0	8.92316	8.92316	8.92316	8.92316	8.92316	8.92316	8.92316	9.95773	8.92316
chr1:93407869-93408097-	0	0	0	2	0	0	0	0	0	0	0	0	0	0	0	0	0	0	0	0	0	0	0	0	0	0	0	0	0	0	0	0	0	0	0	0	0	0	0	0	8.92316	8.92316	8.92316	9.88598	8.92316	8.92316	8.92316	8.92316	8.92316
chr1:93421084-93427636-	0	0	3	1	0	0	0	0	0	0	0	0	0	0	0	0	0	0	0	0	0	0	0	0	0	0	0	0	0	0	0	0	0	0	0	0	0	0	0	0	8.92316	8.92316	10.209	9.48344	8.92316	8.92316	8.92316	8.92316	8.92316
chr1:93428148-93431518-	1	0	1	2	0	0	0	0	0	0	0	0	0	0	0	0	0	0	0	0	0	0	0	0	0	0	0	0	0	0	0	0	0	0	0	0	0	0	0	0	9.40746	8.92316	9.48818	9.88598	8.92316	8.92316	8.92316	8.92316	8.92316
chr1:93429378-93442250-	0	0	0	0	0	0	0	0	0	0	0	0	0	3	0	0	0	0	0	0	0	0	0	0	0	0	0	0	0	0	0	0	0	0	0	0	0	0	0	0	8.92316	8.92316	8.92316	8.92316	8.92316	8.92316	8.92316	8.92316	8.92316
chr1:93437094-93442250-	1	0	0	0	0	1	0	0	0	0	0	0	0	0	0	0	0	0	0	0	0	0	0	0	0	0	0	0	2	0	0	0	0	0	0	0	0	0	3	0	9.40746	8.92316	8.92316	8.92316	8.92316	9.5523	8.92316	8.92316	8.92316
chr1:93438226-93442250-	0	0	0	0	0	0	0	0	1	0	0	0	2	0	0	0	0	0	0	0	0	0	0	0	0	0	0	0	0	0	0	0	0	0	0	0	0	0	0	0	8.92316	8.92316	8.92316	8.92316	8.92316	8.92316	8.92316	8.92316	9.49515
chr1:93497341-93500559+	0	0	0	0	1	0	0	0	0	0	0	0	0	0	0	0	1	2	0	0	1	0	0	1	0	0	0	0	0	0	0	0	0	1	0	0	0	0	0	0	8.92316	8.92316	8.92316	8.92316	9.48822	8.92316	8.92316	8.92316	8.92316
chr1:93577554-93579048+	0	0	0	0	0	0	0	0	0	0	0	2	0	0	0	0	0	0	0	0	0	0	0	0	0	0	0	0	0	0	0	0	0	0	0	0	0	0	0	0	8.92316	8.92316	8.92316	8.92316	8.92316	8.92316	8.92316	8.92316	8.92316
chr1:93605844-93606066+	0	0	0	0	0	0	0	0	0	0	0	0	0	0	0	0	0	0	0	0	0	0	0	0	0	0	0	0	0	0	0	0	0	0	0	2	0	0	0	0	8.92316	8.92316	8.92316	8.92316	8.92316	8.92316	8.92316	8.92316	8.92316
chr1:93623396-93624615-	0	0	0	0	0	0	0	0	0	0	0	0	0	0	0	0	0	0	0	0	0	0	0	0	0	0	0	0	2	0	0	0	0	0	0	0	0	0	0	0	8.92316	8.92316	8.92316	8.92316	8.92316	8.92316	8.92316	8.92316	8.92316
chr1:93624882-93625195-	0	0	0	0	0	0	0	0	0	0	0	0	0	0	0	0	0	0	0	0	0	0	0	0	0	0	0	0	0	0	0	0	0	0	0	0	0	4	0	0	8.92316	8.92316	8.92316	8.92316	8.92316	8.92316	8.92316	8.92316	8.92316
chr1:93714898-93725316-	3	0	0	1	0	0	0	1	2	0	0	1	0	0	0	0	1	0	0	0	0	0	0	0	0	0	0	0	0	0	0	1	0	1	0	0	0	0	0	0	10.0585	8.92316	8.92316	9.48344	8.92316	8.92316	8.92316	9.53126	9.90366
chr1:93749847-93750985-	0	0	0	1	0	0	0	0	1	0	0	0	0	0	0	0	0	0	0	0	0	0	0	0	0	2	0	0	0	0	0	0	0	0	0	4	0	0	0	0	8.92316	8.92316	8.92316	9.48344	8.92316	8.92316	8.92316	8.92316	9.49515
chr1:97025143-97025333+	0	0	0	0	0	0	0	0	0	0	0	0	0	0	0	0	0	2	0	0	0	0	0	0	0	0	0	0	0	0	0	0	0	0	0	0	0	0	0	0	8.92316	8.92316	8.92316	8.92316	8.92316	8.92316	8.92316	8.92316	8.92316
chr1:97645542-97654689-	2	0	2	0	0	0	0	0	0	0	0	0	0	0	0	0	0	1	3	0	1	1	0	0	0	0	0	0	0	0	0	1	0	0	0	0	0	0	0	0	9.7694	8.92316	9.89315	8.92316	8.92316	8.92316	8.92316	8.92316	8.92316
chr1:97645861-97654689-	0	3	0	0	0	0	0	0	1	0	0	0	0	0	0	0	0	0	0	0	0	0	0	0	0	0	2	0	0	0	0	0	1	0	0	0	0	0	0	0	8.92316	10.191	8.92316	8.92316	8.92316	8.92316	8.92316	8.92316	9.49515
chr1:97654600-97657608-	0	0	0	0	0	0	0	0	0	0	0	0	0	0	0	0	0	0	0	0	0	0	0	0	0	0	0	0	0	0	0	0	2	0	1	0	0	0	0	0	8.92316	8.92316	8.92316	8.92316	8.92316	8.92316	8.92316	8.92316	8.92316
chr1:105546664-105566250-	0	0	0	0	0	2	1	0	0	1	0	0	0	0	0	0	0	0	0	0	0	0	0	0	0	0	0	0	1	0	0	0	0	0	0	0	0	0	0	0	8.92316	8.92316	8.92316	8.92316	8.92316	9.98893	9.49805	8.92316	8.92316
chr1:105546664-105599127-	0	0	0	0	0	0	0	0	0	0	0	0	0	0	0	0	0	0	0	0	0	0	0	0	0	0	0	0	0	0	0	0	0	0	0	2	0	0	0	0	8.92316	8.92316	8.92316	8.92316	8.92316	8.92316	8.92316	8.92316	8.92316
chr1:105579922-105599127-	0	0	0	0	0	0	0	0	0	0	0	0	0	0	0	0	0	0	0	0	1	0	0	0	0	0	0	2	0	0	0	0	0	0	0	0	2	0	0	0	8.92316	8.92316	8.92316	8.92316	8.92316	8.92316	8.92316	8.92316	8.92316
chr1:105640665-105649407-	0	0	0	0	0	0	0	1	0	0	0	0	0	0	0	0	0	0	0	0	0	0	0	0	0	3	0	0	0	0	0	0	1	0	0	0	0	0	0	0	8.92316	8.92316	8.92316	8.92316	8.92316	8.92316	8.92316	9.53126	8.92316
chr1:105656666-105659366-	0	0	0	1	0	0	0	0	0	0	0	0	0	0	0	0	0	0	0	0	0	0	0	0	0	0	0	0	0	0	0	2	0	1	0	0	0	0	0	0	8.92316	8.92316	8.92316	9.48344	8.92316	8.92316	8.92316	8.92316	8.92316
chr1:105686949-105696596+	0	0	0	0	0	0	0	0	0	0	0	0	0	0	0	0	0	0	0	0	0	0	0	0	0	0	0	1	0	0	0	0	0	0	0	2	0	0	0	0	8.92316	8.92316	8.92316	8.92316	8.92316	8.92316	8.92316	8.92316	8.92316
chr1:105686949-105721415+	0	0	0	0	0	0	0	1	2	2	1	0	0	0	0	0	0	0	0	0	0	0	0	0	0	0	1	0	1	0	0	1	2	0	0	0	0	0	0	0	8.92316	8.92316	8.92316	8.92316	8.92316	8.92316	8.92316	9.53126	9.90366
chr1:105696501-105716849+	0	0	0	0	0	0	0	0	0	0	0	0	0	0	0	0	0	0	0	0	0	2	0	0	0	0	0	0	0	0	0	0	0	0	0	0	0	0	0	0	8.92316	8.92316	8.92316	8.92316	8.92316	8.92316	8.92316	8.92316	8.92316
chr1:105719452-105727988+	0	0	2	0	0	0	0	0	0	0	0	0	0	0	0	0	0	0	0	0	0	0	0	0	0	0	0	0	0	0	0	0	0	0	0	0	0	0	0	0	8.92316	8.92316	9.89315	8.92316	8.92316	8.92316	8.92316	8.92316	8.92316
chr1:105719452-105736022+	0	0	0	0	0	0	0	0	0	0	0	0	0	0	0	0	0	0	0	0	0	0	0	0	0	0	0	0	0	0	0	2	0	0	0	0	0	0	0	0	8.92316	8.92316	8.92316	8.92316	8.92316	8.92316	8.92316	8.92316	8.92316
chr1:105725649-105726466+	0	0	0	0	0	0	0	0	0	0	0	0	0	0	0	0	0	0	0	0	0	0	0	0	0	0	0	0	0	0	0	0	0	0	0	3	0	0	0	0	8.92316	8.92316	8.92316	8.92316	8.92316	8.92316	8.92316	8.92316	8.92316
chr1:105725649-105736022+	0	0	0	0	0	0	0	1	0	1	0	4	0	0	0	0	0	0	0	0	0	0	0	0	0	0	0	0	0	0	0	0	0	0	0	0	0	0	0	0	8.92316	8.92316	8.92316	8.92316	8.92316	8.92316	8.92316	9.53126	8.92316
chr1:105817669-105827735+	0	0	0	0	0	0	0	0	1	0	0	0	0	0	0	0	0	2	0	0	0	0	0	0	0	0	0	0	0	0	0	0	0	0	0	0	0	0	0	0	8.92316	8.92316	8.92316	8.92316	8.92316	8.92316	8.92316	8.92316	9.49515
chr1:105819870-105827735+	0	0	0	0	0	0	0	0	0	0	0	0	0	2	0	1	2	0	0	0	0	0	0	0	0	0	0	0	0	0	1	0	0	0	0	0	0	0	0	0	8.92316	8.92316	8.92316	8.92316	8.92316	8.92316	8.92316	8.92316	8.92316
chr1:105825000-105827735+	0	0	0	0	0	0	0	0	0	0	0	1	0	0	0	0	0	0	0	0	0	1	0	0	0	1	2	1	1	0	0	0	0	1	0	0	0	0	0	0	8.92316	8.92316	8.92316	8.92316	8.92316	8.92316	8.92316	8.92316	8.92316
chr1:106000931-106006086+	0	0	0	0	0	0	0	0	0	0	0	0	0	0	0	1	0	0	0	0	2	0	0	0	0	0	0	0	0	0	0	0	0	0	0	0	0	0	0	0	8.92316	8.92316	8.92316	8.92316	8.92316	8.92316	8.92316	8.92316	8.92316
chr1:106000931-106011814+	0	0	0	0	0	0	0	0	0	0	0	0	0	0	0	1	1	0	0	0	0	0	0	0	0	0	0	0	0	1	0	0	1	0	0	2	0	0	0	0	8.92316	8.92316	8.92316	8.92316	8.92316	8.92316	8.92316	8.92316	8.92316
chr1:106000931-106021858+	0	3	0	0	0	0	0	0	0	0	0	0	0	0	0	0	0	0	0	0	0	0	0	0	0	0	0	0	0	0	0	0	0	0	0	0	0	0	0	0	8.92316	10.191	8.92316	8.92316	8.92316	8.92316	8.92316	8.92316	8.92316
chr1:106000931-106023758+	0	0	0	0	0	0	0	0	0	0	0	0	0	0	0	0	0	0	0	0	0	0	0	0	0	0	0	0	0	0	0	0	0	0	0	0	0	0	0	2	8.92316	8.92316	8.92316	8.92316	8.92316	8.92316	8.92316	8.92316	8.92316
chr1:106000931-106027531+	0	1	0	0	0	0	0	0	0	0	0	0	0	1	0	0	0	0	0	0	2	0	0	0	0	0	1	0	1	1	0	0	0	2	0	0	0	0	0	0	8.92316	9.47834	8.92316	8.92316	8.92316	8.92316	8.92316	8.92316	8.92316
chr1:106000931-106031233+	0	0	0	0	0	0	0	0	0	0	2	0	0	0	0	1	0	0	0	3	0	0	1	0	0	0	0	0	0	0	0	0	0	1	0	0	3	0	0	0	8.92316	8.92316	8.92316	8.92316	8.92316	8.92316	8.92316	8.92316	8.92316
chr1:106000931-106032235+	0	3	0	0	0	0	0	0	0	0	0	0	0	0	0	0	0	0	0	0	0	0	0	0	0	0	0	0	0	1	0	0	0	0	0	0	0	0	0	0	8.92316	10.191	8.92316	8.92316	8.92316	8.92316	8.92316	8.92316	8.92316
chr1:106011702-106019905+	1	0	0	0	0	0	0	0	0	0	0	0	0	0	0	0	0	0	0	0	0	0	0	0	0	0	0	0	0	0	0	0	0	0	0	2	0	0	0	0	9.40746	8.92316	8.92316	8.92316	8.92316	8.92316	8.92316	8.92316	8.92316
chr1:106011702-106023758+	0	0	0	0	0	0	0	0	0	0	0	2	0	0	0	0	0	0	0	0	0	0	0	0	0	0	0	0	0	0	0	0	0	0	0	0	0	0	0	0	8.92316	8.92316	8.92316	8.92316	8.92316	8.92316	8.92316	8.92316	8.92316
chr1:106011702-106031233+	0	0	0	0	0	0	0	0	0	0	0	0	0	0	0	0	0	0	0	0	0	0	0	0	0	0	0	0	2	0	0	0	0	0	0	0	0	0	0	0	8.92316	8.92316	8.92316	8.92316	8.92316	8.92316	8.92316	8.92316	8.92316
chr1:106772398-106791789-	0	0	0	0	0	0	0	0	0	0	0	0	0	0	0	0	0	0	0	0	0	0	0	0	0	0	0	0	0	0	0	0	0	1	3	0	0	0	0	0	8.92316	8.92316	8.92316	8.92316	8.92316	8.92316	8.92316	8.92316	8.92316
chr1:106772402-106782785-	2	0	0	0	0	0	0	0	0	0	0	0	0	0	0	0	0	0	0	0	0	0	0	0	0	0	0	0	0	0	0	0	0	0	0	0	0	0	0	0	9.7694	8.92316	8.92316	8.92316	8.92316	8.92316	8.92316	8.92316	8.92316
chr1:106772402-106791789-	1	1	0	3	0	0	1	0	0	0	0	0	0	0	0	0	0	1	1	2	2	0	0	0	1	0	0	3	0	0	0	0	1	1	0	0	0	0	3	0	9.40746	9.47834	8.92316	10.2004	8.92316	8.92316	9.49805	8.92316	8.92316
chr1:106786703-106791789-	1	0	0	0	0	0	0	1	0	0	0	0	0	3	0	0	0	0	0	0	2	0	0	0	0	0	0	0	0	0	1	0	0	0	0	0	0	0	1	0	9.40746	8.92316	8.92316	8.92316	8.92316	8.92316	8.92316	9.53126	8.92316
chr1:110908059-110932265-	0	0	0	0	2	0	0	0	0	0	0	0	0	0	0	0	0	0	0	0	0	0	2	0	0	0	0	0	0	0	0	0	0	0	0	0	0	0	0	0	8.92316	8.92316	8.92316	8.92316	9.89321	8.92316	8.92316	8.92316	8.92316
chr1:110924996-110954872-	0	0	0	0	0	0	0	0	0	0	0	0	0	0	0	0	0	0	0	2	0	0	0	0	0	0	0	0	0	0	0	0	0	0	0	0	0	0	0	0	8.92316	8.92316	8.92316	8.92316	8.92316	8.92316	8.92316	8.92316	8.92316
chr1:118419440-118419918+	0	1	2	1	4	0	3	1	0	0	0	0	0	0	0	0	0	0	1	0	0	0	0	1	1	0	2	1	0	0	0	0	1	0	0	0	2	1	3	1	8.92316	9.47834	9.89315	9.48344	10.468	8.92316	10.2269	9.53126	8.92316
chr1:118459801-118467977+	0	0	0	0	0	0	0	0	0	0	0	0	0	0	0	0	0	0	0	0	0	0	0	0	0	0	0	0	0	0	0	0	0	0	0	0	0	0	2	0	8.92316	8.92316	8.92316	8.92316	8.92316	8.92316	8.92316	8.92316	8.92316
chr1:118525297-118539369+	0	0	0	0	0	0	0	0	0	0	0	0	0	0	0	0	0	0	0	0	0	2	0	0	0	0	0	0	0	0	0	0	0	0	0	0	0	0	0	0	8.92316	8.92316	8.92316	8.92316	8.92316	8.92316	8.92316	8.92316	8.92316
chr1:118525297-118570999+	0	0	0	0	0	0	0	0	0	0	0	0	0	0	0	0	2	0	0	0	0	0	0	0	0	0	0	0	0	0	0	0	0	0	0	0	0	0	0	0	8.92316	8.92316	8.92316	8.92316	8.92316	8.92316	8.92316	8.92316	8.92316
chr1:118543102-118548028+	0	0	0	0	0	0	0	0	0	0	0	0	0	0	0	0	0	0	0	0	0	0	0	0	0	0	0	0	0	0	0	0	0	0	2	0	0	0	0	0	8.92316	8.92316	8.92316	8.92316	8.92316	8.92316	8.92316	8.92316	8.92316
chr1:118661980-118677635+	0	0	0	0	0	0	0	0	0	0	0	0	0	0	0	0	0	0	0	0	0	0	0	0	0	0	0	0	0	0	3	0	2	0	2	0	0	0	0	0	8.92316	8.92316	8.92316	8.92316	8.92316	8.92316	8.92316	8.92316	8.92316
chr1:118678986-118679974+	0	0	0	0	0	0	0	0	0	0	0	0	0	0	0	0	0	0	0	0	2	0	0	0	0	0	0	0	0	0	0	0	0	0	0	0	0	0	0	0	8.92316	8.92316	8.92316	8.92316	8.92316	8.92316	8.92316	8.92316	8.92316
chr1:118680494-118682207+	0	0	0	0	0	0	0	0	0	0	0	0	0	0	0	0	0	0	0	0	2	0	0	0	0	0	0	0	0	0	0	0	0	0	0	0	0	0	0	0	8.92316	8.92316	8.92316	8.92316	8.92316	8.92316	8.92316	8.92316	8.92316
chr1:118866572-118890401-	0	1	0	1	0	0	0	0	0	0	0	0	0	0	0	0	0	1	0	0	0	0	0	0	0	0	0	0	0	0	1	0	3	1	0	0	0	0	0	0	8.92316	9.47834	8.92316	9.48344	8.92316	8.92316	8.92316	8.92316	8.92316
chr1:119548894-119579077-	0	0	0	0	1	0	0	0	0	0	1	0	0	0	0	0	0	0	2	0	0	0	0	0	0	0	0	0	0	0	0	0	0	0	0	0	2	2	2	0	8.92316	8.92316	8.92316	8.92316	9.48822	8.92316	8.92316	8.92316	8.92316
chr1:119567796-119579077-	1	1	0	0	1	0	0	1	2	1	0	0	0	0	3	0	2	2	0	0	0	2	3	1	0	0	0	1	0	1	0	1	0	1	0	1	0	1	3	0	9.40746	9.47834	8.92316	8.92316	9.48822	8.92316	8.92316	9.53126	9.90366
chr1:119599005-119609254-	0	0	0	0	0	0	0	0	0	0	0	0	0	0	0	0	0	0	2	0	0	0	0	0	0	0	0	0	0	0	0	0	0	0	0	0	0	0	0	0	8.92316	8.92316	8.92316	8.92316	8.92316	8.92316	8.92316	8.92316	8.92316
chr1:119599005-119609286-	0	0	0	1	0	0	0	0	5	0	0	0	0	0	0	0	0	0	0	0	1	0	0	0	0	1	0	0	0	0	0	0	0	0	0	0	0	1	0	0	8.92316	8.92316	8.92316	9.48344	8.92316	8.92316	8.92316	8.92316	10.7026
chr1:119605228-119609286-	0	0	0	0	0	0	2	0	0	0	0	0	0	0	0	0	0	0	0	0	0	0	0	0	0	0	0	0	0	0	0	0	0	0	0	0	0	0	0	0	8.92316	8.92316	8.92316	8.92316	8.92316	8.92316	9.90803	8.92316	8.92316
chr1:119667514-119692909-	0	1	0	0	0	0	0	0	0	0	0	0	0	0	0	0	0	0	0	0	0	0	1	0	0	0	0	0	0	0	0	0	0	0	0	0	0	3	0	1	8.92316	9.47834	8.92316	8.92316	8.92316	8.92316	8.92316	8.92316	8.92316
chr1:119678755-119687766-	0	0	0	0	0	0	2	0	0	0	0	0	0	0	0	0	0	1	0	0	0	0	0	0	0	0	0	0	0	0	0	0	0	0	0	0	0	0	0	0	8.92316	8.92316	8.92316	8.92316	8.92316	8.92316	9.90803	8.92316	8.92316
chr1:119691601-119773271-	1	0	0	0	0	0	0	0	0	0	0	0	0	0	0	0	0	0	2	0	0	0	0	0	0	0	0	0	0	0	0	0	0	0	0	0	0	0	0	0	9.40746	8.92316	8.92316	8.92316	8.92316	8.92316	8.92316	8.92316	8.92316
chr1:119726033-119773271-	0	0	0	0	0	0	0	0	0	0	0	0	0	0	0	0	0	2	0	0	0	0	0	0	0	0	0	0	0	0	0	0	0	0	0	0	0	0	0	0	8.92316	8.92316	8.92316	8.92316	8.92316	8.92316	8.92316	8.92316	8.92316
chr1:119741355-119765481-	0	0	0	0	0	0	0	0	0	0	0	0	0	0	0	0	0	0	0	0	0	0	0	0	0	0	0	0	0	0	0	0	0	0	0	0	0	4	0	0	8.92316	8.92316	8.92316	8.92316	8.92316	8.92316	8.92316	8.92316	8.92316
chr1:119741355-119765922-	3	2	0	0	2	0	0	1	0	0	0	0	1	0	0	0	0	1	0	0	0	2	0	0	0	0	0	0	0	0	0	1	1	3	0	1	0	0	0	2	10.0585	9.87826	8.92316	8.92316	9.89321	8.92316	8.92316	9.53126	8.92316
chr1:121319597-121319972-	0	0	0	0	0	0	0	0	0	0	0	0	0	0	0	0	0	0	2	0	0	0	0	0	0	1	0	0	0	0	0	0	0	0	0	0	0	0	1	0	8.92316	8.92316	8.92316	8.92316	8.92316	8.92316	8.92316	8.92316	8.92316
chr1:121430196-121430631-	0	0	0	0	0	0	0	0	0	0	0	0	0	3	0	0	0	0	0	0	0	0	0	0	0	0	0	0	0	0	0	0	0	0	0	0	0	0	0	0	8.92316	8.92316	8.92316	8.92316	8.92316	8.92316	8.92316	8.92316	8.92316
chr1:123439998-123441801-	0	0	0	0	0	0	0	0	0	0	0	0	2	0	0	0	0	0	0	0	0	0	0	0	0	0	0	0	0	0	0	0	0	0	0	0	0	0	0	0	8.92316	8.92316	8.92316	8.92316	8.92316	8.92316	8.92316	8.92316	8.92316
chr1:123485894-123486125-	0	0	0	0	0	0	0	0	0	0	0	0	0	0	0	0	0	0	0	0	0	0	0	2	0	0	0	0	0	0	0	0	0	0	0	0	0	0	0	0	8.92316	8.92316	8.92316	8.92316	8.92316	8.92316	8.92316	8.92316	8.92316
chr1:125403393-125411374-	1	0	0	1	0	0	1	0	0	0	0	0	0	0	0	0	0	0	0	0	0	0	1	0	0	0	0	0	0	0	0	0	0	0	0	0	0	4	0	0	9.40746	8.92316	8.92316	9.48344	8.92316	8.92316	9.49805	8.92316	8.92316
chr1:125403393-125418304-	0	0	0	0	0	2	0	0	0	0	0	1	1	0	0	0	0	1	0	1	0	0	0	0	0	0	0	0	0	1	0	2	0	1	0	0	0	0	0	2	8.92316	8.92316	8.92316	8.92316	8.92316	9.98893	8.92316	8.92316	8.92316
chr1:125405845-125411374-	0	0	2	1	0	0	0	0	0	0	0	0	0	0	0	0	0	0	0	0	0	0	0	0	0	0	0	0	0	0	0	0	0	0	0	0	0	0	0	0	8.92316	8.92316	9.89315	9.48344	8.92316	8.92316	8.92316	8.92316	8.92316
chr1:125411264-125418304-	0	0	2	0	0	0	0	0	0	0	0	0	0	0	0	0	0	0	0	0	0	0	0	0	1	0	1	0	0	0	0	0	0	0	0	0	0	0	0	0	8.92316	8.92316	9.89315	8.92316	8.92316	8.92316	8.92316	8.92316	8.92316
chr1:125566468-125572503+	0	0	0	0	0	0	0	0	0	0	2	0	0	0	0	0	0	0	0	0	0	0	0	0	0	0	0	0	0	0	0	0	0	0	0	0	0	0	0	0	8.92316	8.92316	8.92316	8.92316	8.92316	8.92316	8.92316	8.92316	8.92316
chr1:125587365-125591129+	0	0	1	0	3	0	0	0	0	0	0	0	0	0	0	0	0	0	0	2	0	0	0	0	0	0	0	0	0	0	0	0	0	0	0	0	0	0	0	0	8.92316	8.92316	9.48818	8.92316	10.2091	8.92316	8.92316	8.92316	8.92316
chr1:125730667-125730957+	0	0	0	0	0	0	0	0	0	0	0	2	0	0	0	0	0	0	0	0	0	0	0	0	0	0	0	0	0	0	0	0	0	0	0	0	0	0	0	0	8.92316	8.92316	8.92316	8.92316	8.92316	8.92316	8.92316	8.92316	8.92316
chr1:125976926-126033964-	0	0	0	0	0	0	0	0	0	0	0	0	0	0	0	0	0	0	0	0	0	0	0	0	0	0	0	0	0	0	0	0	0	0	0	0	1	0	0	2	8.92316	8.92316	8.92316	8.92316	8.92316	8.92316	8.92316	8.92316	8.92316
chr1:125981383-125981697-	0	0	0	0	0	0	0	0	0	0	0	0	0	0	0	0	0	0	0	0	1	0	0	0	0	3	0	0	0	0	0	0	0	0	0	0	0	0	0	0	8.92316	8.92316	8.92316	8.92316	8.92316	8.92316	8.92316	8.92316	8.92316
chr1:126025051-126025231-	0	0	0	0	0	0	2	0	0	0	0	0	0	0	0	0	0	0	0	0	0	0	0	0	0	0	0	0	0	0	0	0	0	0	0	0	0	0	0	0	8.92316	8.92316	8.92316	8.92316	8.92316	8.92316	9.90803	8.92316	8.92316
chr1:126083442-126100985+	0	0	0	0	0	0	0	2	0	1	0	0	0	0	0	0	0	0	0	0	0	0	0	0	0	0	0	0	0	0	0	0	0	0	0	0	0	0	0	0	8.92316	8.92316	8.92316	8.92316	8.92316	8.92316	8.92316	9.95773	8.92316
chr1:126222609-126258478-	0	0	0	0	0	2	0	0	0	2	0	0	0	0	0	0	0	0	0	0	0	0	0	0	0	0	0	0	0	0	0	0	0	0	0	0	0	0	0	0	8.92316	8.92316	8.92316	8.92316	8.92316	9.98893	8.92316	8.92316	8.92316
chr1:126676840-126677024-	0	0	0	0	0	0	0	0	0	0	0	0	0	0	0	0	0	0	0	0	0	0	0	0	0	0	0	0	0	0	0	0	0	0	2	0	0	0	0	0	8.92316	8.92316	8.92316	8.92316	8.92316	8.92316	8.92316	8.92316	8.92316
chr1:127306634-127320765+	0	0	2	0	0	0	0	0	2	0	0	0	2	0	0	0	0	0	0	0	0	0	0	0	0	0	0	0	0	0	0	0	0	0	0	0	0	0	0	0	8.92316	8.92316	9.89315	8.92316	8.92316	8.92316	8.92316	8.92316	9.90366
chr1:127320604-127320765+	0	0	0	0	0	0	0	0	0	1	0	0	0	0	0	0	0	0	0	0	0	0	0	0	0	0	0	0	1	0	0	0	0	0	0	0	0	0	0	2	8.92316	8.92316	8.92316	8.92316	8.92316	8.92316	8.92316	8.92316	8.92316
chr1:127320604-127366492+	0	0	0	1	0	0	0	0	0	0	0	0	2	0	0	0	0	0	0	0	0	0	0	0	0	0	0	0	0	0	0	0	0	0	0	0	0	0	0	0	8.92316	8.92316	8.92316	9.48344	8.92316	8.92316	8.92316	8.92316	8.92316
chr1:127338056-127338298+	0	0	0	0	0	0	0	0	0	0	0	0	0	0	3	0	0	0	0	0	0	0	0	0	0	0	0	0	0	0	0	0	0	0	0	0	0	0	0	0	8.92316	8.92316	8.92316	8.92316	8.92316	8.92316	8.92316	8.92316	8.92316
chr1:127382921-127387512+	0	0	0	0	0	0	0	0	0	0	0	0	0	0	0	0	0	0	0	0	0	0	0	0	0	0	0	0	0	0	0	0	0	0	0	0	2	0	0	3	8.92316	8.92316	8.92316	8.92316	8.92316	8.92316	8.92316	8.92316	8.92316
chr1:127382921-127390878+	0	0	0	0	0	0	0	0	0	0	0	0	0	0	0	0	0	0	0	0	2	0	0	0	0	0	0	0	0	0	0	0	0	0	0	0	0	0	0	0	8.92316	8.92316	8.92316	8.92316	8.92316	8.92316	8.92316	8.92316	8.92316
chr1:127382921-127397640+	0	0	0	0	0	0	0	0	0	0	0	0	0	0	0	0	0	0	0	2	0	0	0	0	0	0	0	0	0	0	0	0	0	0	0	0	0	0	0	0	8.92316	8.92316	8.92316	8.92316	8.92316	8.92316	8.92316	8.92316	8.92316
chr1:127446242-127459982+	1	0	1	1	1	0	3	0	0	0	0	0	0	0	0	0	0	0	0	0	0	0	0	0	1	0	0	0	0	0	0	0	0	0	0	0	0	0	0	0	9.40746	8.92316	9.48818	9.48344	9.48822	8.92316	10.2269	8.92316	8.92316
chr1:127791605-127799553+	0	0	0	0	1	0	0	0	0	0	0	0	0	0	0	0	0	0	0	0	0	0	0	0	0	1	2	0	0	0	1	0	1	0	0	0	0	0	0	0	8.92316	8.92316	8.92316	8.92316	9.48822	8.92316	8.92316	8.92316	8.92316
chr1:127791605-127803659+	0	0	2	3	0	0	3	0	1	0	0	0	0	0	0	0	0	0	0	0	0	0	0	0	0	1	1	0	0	0	1	0	1	0	0	0	0	0	0	0	8.92316	8.92316	9.89315	10.2004	8.92316	8.92316	10.2269	8.92316	9.49515
chr1:127919568-127928121+	0	0	0	0	0	0	4	0	0	0	0	0	0	0	0	0	0	0	0	0	0	0	0	0	0	0	0	0	0	0	0	0	0	0	0	0	0	0	0	0	8.92316	8.92316	8.92316	8.92316	8.92316	8.92316	10.4879	8.92316	8.92316
chr1:127924728-127928121+	3	0	0	0	1	1	1	0	1	1	1	1	2	1	0	1	0	0	0	0	0	0	2	0	0	0	0	2	0	0	0	0	0	1	1	0	0	1	0	0	10.0585	8.92316	8.92316	8.92316	9.48822	9.5523	9.49805	8.92316	9.49515
chr1:127930707-127937565+	0	2	0	0	0	0	0	0	0	0	0	0	0	0	0	0	0	0	0	0	1	0	0	0	0	0	0	0	0	0	0	0	0	0	0	0	0	0	0	0	8.92316	9.87826	8.92316	8.92316	8.92316	8.92316	8.92316	8.92316	8.92316
chr1:128032849-128040996-	0	0	0	0	0	0	0	0	0	0	0	0	0	0	0	0	0	0	0	0	0	0	0	0	0	0	0	0	0	0	0	0	0	0	0	2	0	0	0	0	8.92316	8.92316	8.92316	8.92316	8.92316	8.92316	8.92316	8.92316	8.92316
chr1:128151744-128153399+	0	3	0	0	1	1	0	1	0	1	0	0	0	0	1	1	0	0	1	0	0	1	0	0	0	0	0	1	1	0	0	0	0	1	0	0	0	0	0	0	8.92316	10.191	8.92316	8.92316	9.48822	9.5523	8.92316	9.53126	8.92316
chr1:128186758-128216552+	0	0	0	0	2	0	0	0	0	0	0	0	0	0	0	0	0	0	0	0	0	0	0	0	0	0	0	0	0	0	0	0	0	0	0	0	0	0	0	0	8.92316	8.92316	8.92316	8.92316	9.89321	8.92316	8.92316	8.92316	8.92316
chr1:128193460-128197097+	0	0	0	0	0	0	0	0	1	0	0	0	0	0	0	0	0	0	0	0	0	0	0	0	0	2	0	0	0	0	0	0	0	0	1	0	2	0	0	0	8.92316	8.92316	8.92316	8.92316	8.92316	8.92316	8.92316	8.92316	9.49515
chr1:128193460-128221703+	2	0	2	1	0	0	0	0	1	0	2	1	0	1	0	0	0	0	0	0	1	0	1	0	0	3	0	0	0	0	0	0	0	0	0	3	0	0	0	0	9.7694	8.92316	9.89315	9.48344	8.92316	8.92316	8.92316	8.92316	9.49515
chr1:128193460-128223641+	1	0	0	0	2	0	0	0	0	0	0	0	3	3	1	1	1	2	2	0	0	2	0	1	5	0	2	0	1	2	0	1	0	0	1	1	1	0	4	0	9.40746	8.92316	8.92316	8.92316	9.89321	8.92316	8.92316	8.92316	8.92316
chr1:128252203-128262957+	0	0	0	0	0	0	0	0	1	0	0	0	0	0	0	1	0	0	0	0	2	1	0	3	0	1	1	0	0	0	0	0	0	0	0	0	0	0	0	0	8.92316	8.92316	8.92316	8.92316	8.92316	8.92316	8.92316	8.92316	9.49515
chr1:128252203-128275004+	0	0	2	1	0	0	0	0	0	0	0	0	0	0	0	0	0	0	0	0	0	0	0	0	0	0	0	0	0	0	0	0	0	0	0	0	0	0	0	0	8.92316	8.92316	9.89315	9.48344	8.92316	8.92316	8.92316	8.92316	8.92316
chr1:128255433-128256237+	0	1	0	0	0	0	2	0	0	0	0	0	0	0	0	0	0	0	0	0	0	0	0	0	0	0	0	0	0	0	0	0	0	0	0	0	0	0	0	0	8.92316	9.47834	8.92316	8.92316	8.92316	8.92316	9.90803	8.92316	8.92316
chr1:128258832-128260888+	0	0	0	0	0	0	0	0	0	0	0	0	0	2	0	0	0	0	0	0	0	0	0	0	0	0	0	0	0	0	0	0	0	0	0	0	0	0	0	0	8.92316	8.92316	8.92316	8.92316	8.92316	8.92316	8.92316	8.92316	8.92316
chr1:129595370-129596180+	0	0	0	0	0	0	0	0	0	0	0	0	2	0	0	0	0	0	0	0	0	0	0	0	0	0	0	0	0	0	0	0	0	0	0	0	0	0	0	0	8.92316	8.92316	8.92316	8.92316	8.92316	8.92316	8.92316	8.92316	8.92316
chr1:130447009-130447282-	0	0	0	0	0	0	0	0	0	0	0	0	0	0	0	0	0	0	0	0	0	0	0	0	0	0	0	0	2	0	0	0	0	0	0	0	0	0	0	0	8.92316	8.92316	8.92316	8.92316	8.92316	8.92316	8.92316	8.92316	8.92316
chr1:130682149-130684070-	0	0	0	0	0	0	0	0	0	0	0	0	0	0	0	1	0	1	0	0	1	0	0	0	0	0	0	0	0	0	0	0	0	0	0	2	0	0	2	1	8.92316	8.92316	8.92316	8.92316	8.92316	8.92316	8.92316	8.92316	8.92316
chr1:130701597-130701789-	0	0	0	0	0	0	0	0	0	0	0	0	2	0	0	0	0	0	0	0	0	0	0	0	0	0	0	0	0	0	0	0	0	0	0	0	0	0	0	0	8.92316	8.92316	8.92316	8.92316	8.92316	8.92316	8.92316	8.92316	8.92316
chr1:130705377-130708201-	0	0	1	0	0	0	1	1	0	0	0	0	0	0	0	1	0	0	0	0	0	0	0	1	0	0	0	0	0	0	0	0	0	0	0	0	0	0	2	0	8.92316	8.92316	9.48818	8.92316	8.92316	8.92316	9.49805	9.53126	8.92316
chr1:130844720-130846493+	0	0	0	0	0	0	0	0	0	0	0	0	0	0	0	0	0	0	0	0	0	0	0	0	2	0	0	0	0	0	0	0	0	0	0	0	0	0	0	0	8.92316	8.92316	8.92316	8.92316	8.92316	8.92316	8.92316	8.92316	8.92316
chr1:131163520-131171111+	0	0	0	0	0	0	0	0	0	0	0	0	3	0	0	0	0	0	0	0	0	0	0	0	0	0	0	0	0	0	0	0	0	0	0	0	0	0	0	0	8.92316	8.92316	8.92316	8.92316	8.92316	8.92316	8.92316	8.92316	8.92316
chr1:131263273-131265950-	0	0	0	0	0	0	0	0	0	0	0	0	0	0	0	0	0	0	0	0	0	0	0	0	0	0	0	0	2	0	0	0	0	0	0	0	0	0	0	0	8.92316	8.92316	8.92316	8.92316	8.92316	8.92316	8.92316	8.92316	8.92316
chr1:131292762-131292914-	0	0	0	0	0	0	0	0	0	0	0	0	0	0	0	0	0	0	0	0	0	0	0	0	0	0	2	0	0	0	0	0	0	0	0	0	0	0	0	0	8.92316	8.92316	8.92316	8.92316	8.92316	8.92316	8.92316	8.92316	8.92316
chr1:131344349-131349676-	0	0	0	0	0	0	0	0	0	0	0	0	0	0	0	0	0	1	0	0	0	0	0	0	0	0	0	0	0	0	0	0	0	0	0	0	0	0	2	0	8.92316	8.92316	8.92316	8.92316	8.92316	8.92316	8.92316	8.92316	8.92316
chr1:131344349-131356905-	0	0	0	0	0	0	0	0	0	0	0	0	0	0	0	0	0	0	0	0	0	0	0	1	0	0	0	0	0	0	0	0	0	0	0	0	0	2	0	0	8.92316	8.92316	8.92316	8.92316	8.92316	8.92316	8.92316	8.92316	8.92316
chr1:131696999-131705721+	0	0	0	0	0	0	0	0	0	0	0	0	0	0	0	0	0	0	0	0	0	0	0	0	0	0	0	0	0	0	0	0	0	0	0	2	0	0	0	0	8.92316	8.92316	8.92316	8.92316	8.92316	8.92316	8.92316	8.92316	8.92316
chr1:132013026-132019466+	0	1	0	0	0	0	0	0	0	0	0	0	0	0	0	0	0	3	0	0	2	0	0	0	0	0	0	0	0	0	0	0	0	0	0	0	0	0	0	0	8.92316	9.47834	8.92316	8.92316	8.92316	8.92316	8.92316	8.92316	8.92316
chr1:132013026-132023838+	0	0	0	0	0	0	1	0	2	0	2	0	1	0	0	0	0	0	0	2	0	0	0	0	0	1	0	0	0	1	1	1	1	0	0	0	1	0	1	0	8.92316	8.92316	8.92316	8.92316	8.92316	8.92316	9.49805	8.92316	9.90366
chr1:132014383-132019466+	7	8	0	4	3	3	2	1	5	0	1	1	0	5	0	6	2	2	1	2	2	3	7	4	4	4	2	7	4	4	3	8	2	5	3	7	4	0	1	8	10.8462	11.1726	8.92316	10.4583	10.2091	10.3237	9.90803	9.53126	10.7026
chr1:132014383-132023838+	9	7	5	6	3	0	5	6	3	0	6	5	7	6	2	6	5	5	15	3	14	2	10	11	9	2	7	3	11	8	16	6	11	4	2	10	4	3	5	4	11.1217	11.0226	10.6874	10.867	10.2091	8.92316	10.7088	10.9747	10.2217
chr1:132014383-132034002+	0	0	0	0	0	0	0	0	0	0	0	0	0	0	0	0	0	0	0	0	0	0	0	0	0	0	0	0	0	0	0	0	0	0	2	0	0	0	0	0	8.92316	8.92316	8.92316	8.92316	8.92316	8.92316	8.92316	8.92316	8.92316
chr1:132017593-132023838+	0	0	0	0	0	0	0	0	0	0	0	0	0	0	0	0	0	0	0	0	0	4	0	0	0	0	0	0	0	0	0	0	0	0	0	0	0	0	0	0	8.92316	8.92316	8.92316	8.92316	8.92316	8.92316	8.92316	8.92316	8.92316
chr1:132052380-132054224-	1	0	0	0	0	0	0	0	0	0	0	1	0	1	0	0	0	0	0	0	0	0	1	0	1	0	0	0	0	0	0	0	0	3	2	0	0	0	0	0	9.40746	8.92316	8.92316	8.92316	8.92316	8.92316	8.92316	8.92316	8.92316
chr1:132330000-132331662+	2	0	0	0	0	0	0	0	0	0	0	0	0	0	0	0	0	0	0	0	0	0	0	0	0	0	0	0	0	0	0	0	0	0	0	0	0	0	0	0	9.7694	8.92316	8.92316	8.92316	8.92316	8.92316	8.92316	8.92316	8.92316
chr1:132489588-132490585+	0	0	0	0	0	0	0	0	0	0	1	2	0	0	0	0	0	0	0	0	0	0	0	0	0	0	0	0	0	0	0	0	0	0	0	0	0	0	0	0	8.92316	8.92316	8.92316	8.92316	8.92316	8.92316	8.92316	8.92316	8.92316
chr1:132990683-132991009-	0	0	0	0	0	0	0	0	2	0	0	0	0	0	0	0	0	0	0	0	0	0	0	0	0	0	0	0	0	0	0	0	0	0	0	0	0	0	0	0	8.92316	8.92316	8.92316	8.92316	8.92316	8.92316	8.92316	8.92316	9.90366
chr1:132991700-132992225-	0	0	1	2	0	0	0	0	0	0	0	1	0	0	0	0	0	3	0	0	1	0	1	1	0	0	1	0	0	0	0	0	0	0	0	0	0	0	0	0	8.92316	8.92316	9.48818	9.88598	8.92316	8.92316	8.92316	8.92316	8.92316
chr1:132994503-133001443-	0	0	0	0	0	0	0	0	0	2	0	0	0	0	0	0	0	0	0	0	0	0	0	0	0	0	0	0	0	0	0	0	0	0	0	0	0	0	0	0	8.92316	8.92316	8.92316	8.92316	8.92316	8.92316	8.92316	8.92316	8.92316
chr1:133001283-133018884-	0	0	0	0	0	0	0	0	0	0	0	0	0	3	0	0	0	0	0	0	0	0	0	0	0	0	0	0	2	0	0	0	0	0	0	0	0	0	0	0	8.92316	8.92316	8.92316	8.92316	8.92316	8.92316	8.92316	8.92316	8.92316
chr1:133009137-133012714-	0	0	0	0	0	0	0	0	2	0	0	0	0	0	0	0	0	1	0	0	0	0	0	1	0	0	0	0	0	0	0	0	0	0	0	0	0	0	0	1	8.92316	8.92316	8.92316	8.92316	8.92316	8.92316	8.92316	8.92316	9.90366
chr1:133066212-133070418+	0	0	0	0	1	1	0	0	0	0	0	0	0	0	0	0	0	0	0	0	0	0	0	0	0	0	0	0	0	0	0	0	0	0	0	3	0	0	0	0	8.92316	8.92316	8.92316	8.92316	9.48822	9.5523	8.92316	8.92316	8.92316
chr1:133082730-133088575+	0	0	0	0	0	0	2	0	0	0	0	0	0	0	0	0	0	0	0	0	0	0	0	0	0	0	0	0	0	0	0	0	0	0	0	0	0	0	0	0	8.92316	8.92316	8.92316	8.92316	8.92316	8.92316	9.90803	8.92316	8.92316
chr1:133085628-133085787+	0	0	0	0	0	0	0	0	0	0	0	0	9	0	0	0	0	0	0	0	0	0	0	0	0	0	0	0	0	0	0	0	0	0	0	0	0	0	0	0	8.92316	8.92316	8.92316	8.92316	8.92316	8.92316	8.92316	8.92316	8.92316
chr1:133098631-133099309+	0	0	0	0	0	0	0	0	0	0	0	0	0	0	0	0	0	0	0	0	0	3	0	0	0	0	0	0	0	0	0	0	0	0	0	0	0	0	0	0	8.92316	8.92316	8.92316	8.92316	8.92316	8.92316	8.92316	8.92316	8.92316
chr1:133098631-133099714+	0	0	1	1	0	2	0	0	1	0	0	1	0	1	0	1	0	0	1	1	2	0	1	0	0	0	0	0	0	1	0	0	0	0	0	0	0	0	0	0	8.92316	8.92316	9.48818	9.48344	8.92316	9.98893	8.92316	8.92316	9.49515
chr1:133099605-133102397+	0	0	0	0	0	0	0	0	0	0	0	0	0	0	0	0	0	0	0	0	0	0	0	0	2	0	0	0	0	0	0	0	0	0	0	0	0	0	0	0	8.92316	8.92316	8.92316	8.92316	8.92316	8.92316	8.92316	8.92316	8.92316
chr1:133225547-133225700+	0	0	0	0	0	0	0	0	0	0	0	0	0	0	2	0	0	0	0	0	0	0	0	0	0	0	0	0	0	0	0	0	0	0	0	0	0	0	0	0	8.92316	8.92316	8.92316	8.92316	8.92316	8.92316	8.92316	8.92316	8.92316
chr1:133237782-133237999+	0	0	0	0	0	0	0	0	0	0	0	0	0	0	0	0	0	0	0	0	0	0	0	0	0	0	0	2	0	0	0	0	0	0	0	0	0	0	0	0	8.92316	8.92316	8.92316	8.92316	8.92316	8.92316	8.92316	8.92316	8.92316
chr1:133259009-133266666+	0	2	0	0	0	0	0	0	0	0	0	0	0	0	0	0	0	0	0	0	0	1	0	0	0	0	0	0	0	0	0	0	0	0	0	0	0	0	1	0	8.92316	9.87826	8.92316	8.92316	8.92316	8.92316	8.92316	8.92316	8.92316
chr1:133259009-133274374+	1	1	0	1	0	0	0	0	0	0	0	0	0	0	0	0	0	0	0	2	0	0	0	0	0	0	0	0	0	0	0	0	0	0	0	0	0	0	0	0	9.40746	9.47834	8.92316	9.48344	8.92316	8.92316	8.92316	8.92316	8.92316
chr1:133259009-133294708+	0	0	2	0	0	0	0	0	0	0	1	1	0	0	0	0	0	0	0	0	0	0	2	1	0	0	0	0	0	0	0	0	0	0	0	0	0	0	0	0	8.92316	8.92316	9.89315	8.92316	8.92316	8.92316	8.92316	8.92316	8.92316
chr1:133263093-133271104+	0	0	0	0	0	0	0	0	0	0	0	2	0	0	0	0	0	0	0	0	0	0	0	0	0	0	0	0	0	0	0	0	0	0	0	0	0	0	0	0	8.92316	8.92316	8.92316	8.92316	8.92316	8.92316	8.92316	8.92316	8.92316
chr1:133278586-133278788+	0	0	0	0	0	0	0	0	0	1	0	0	0	0	0	0	0	0	0	0	1	0	0	0	0	0	0	0	0	0	2	0	0	0	0	0	0	0	0	0	8.92316	8.92316	8.92316	8.92316	8.92316	8.92316	8.92316	8.92316	8.92316
chr1:133280079-133280338+	0	0	0	0	0	0	0	0	0	0	0	0	0	0	0	0	0	0	0	0	0	2	0	0	0	0	0	0	0	0	0	0	0	0	0	0	0	0	0	0	8.92316	8.92316	8.92316	8.92316	8.92316	8.92316	8.92316	8.92316	8.92316
chr1:133281783-133294708+	0	0	0	0	0	0	0	0	0	0	0	0	0	0	0	0	0	0	0	0	0	0	1	0	2	0	0	0	0	0	0	0	0	0	0	1	0	0	0	0	8.92316	8.92316	8.92316	8.92316	8.92316	8.92316	8.92316	8.92316	8.92316
chr1:133284880-133294708+	0	1	0	0	0	0	0	0	0	0	0	0	0	0	0	0	0	0	0	0	0	0	0	0	0	2	0	0	0	0	0	0	0	0	0	0	0	0	0	0	8.92316	9.47834	8.92316	8.92316	8.92316	8.92316	8.92316	8.92316	8.92316
chr1:133286309-133286550+	0	0	0	0	0	0	0	0	0	0	0	0	1	0	0	0	0	0	0	0	0	0	0	0	2	0	0	1	1	0	0	0	1	0	0	0	1	0	0	1	8.92316	8.92316	8.92316	8.92316	8.92316	8.92316	8.92316	8.92316	8.92316
chr1:133294029-133294754+	0	0	0	0	0	0	0	0	0	0	0	0	0	0	0	0	0	0	0	0	0	0	0	0	0	0	0	0	0	0	0	0	0	2	0	0	0	0	0	0	8.92316	8.92316	8.92316	8.92316	8.92316	8.92316	8.92316	8.92316	8.92316
chr1:133633762-133647529-	0	2	0	0	2	0	0	0	0	0	0	0	0	0	0	0	0	0	0	0	1	0	0	0	0	0	0	0	0	0	0	0	0	0	0	0	0	0	0	0	8.92316	9.87826	8.92316	8.92316	9.89321	8.92316	8.92316	8.92316	8.92316
chr1:133711994-133713668-	0	0	0	0	0	0	0	0	0	0	0	0	0	0	2	0	0	0	0	0	0	0	0	0	0	0	0	0	0	0	0	0	0	0	0	0	0	0	0	0	8.92316	8.92316	8.92316	8.92316	8.92316	8.92316	8.92316	8.92316	8.92316
chr1:133753089-133753749-	5	3	4	4	0	1	2	1	6	3	2	2	5	5	2	0	1	1	1	1	5	9	3	1	3	4	1	4	4	5	0	0	2	2	1	3	0	5	1	1	10.5055	10.191	10.468	10.4583	8.92316	9.5523	9.90803	9.53126	10.8938
chr1:134348199-134350086-	0	0	0	0	0	0	0	0	0	0	0	0	4	0	0	0	0	0	0	0	0	0	0	0	0	0	0	0	0	0	0	0	0	2	0	0	0	0	0	0	8.92316	8.92316	8.92316	8.92316	8.92316	8.92316	8.92316	8.92316	8.92316
chr1:134350083-134360924-	0	0	0	0	0	0	0	0	0	0	0	0	0	0	0	0	0	0	0	0	2	0	0	0	0	0	0	0	0	0	0	0	0	0	0	0	0	0	0	0	8.92316	8.92316	8.92316	8.92316	8.92316	8.92316	8.92316	8.92316	8.92316
chr1:134463827-134475902+	0	2	2	0	1	0	0	0	0	0	0	0	0	0	0	0	0	0	0	0	0	0	0	0	0	0	0	0	0	0	0	0	0	0	0	0	0	0	0	0	8.92316	9.87826	9.89315	8.92316	9.48822	8.92316	8.92316	8.92316	8.92316
chr1:134475788-134485913+	0	0	0	0	0	0	0	0	0	0	0	0	0	0	0	0	0	0	0	0	0	0	0	0	0	0	0	0	0	0	0	0	0	0	0	0	0	0	0	2	8.92316	8.92316	8.92316	8.92316	8.92316	8.92316	8.92316	8.92316	8.92316
chr1:134585154-134593463+	0	0	0	0	0	0	0	0	0	0	0	0	0	0	0	0	0	0	0	0	0	0	0	0	0	0	0	2	0	0	0	0	0	0	0	0	0	0	0	0	8.92316	8.92316	8.92316	8.92316	8.92316	8.92316	8.92316	8.92316	8.92316
chr1:134585154-134599218+	0	0	0	0	0	0	0	0	0	0	0	0	0	0	0	0	0	0	0	0	0	0	0	0	0	0	0	0	0	2	0	0	0	0	0	0	0	0	0	0	8.92316	8.92316	8.92316	8.92316	8.92316	8.92316	8.92316	8.92316	8.92316
chr1:134587922-134593463+	0	0	0	0	0	0	0	0	0	0	0	0	0	0	0	0	0	2	0	0	0	0	0	0	0	0	0	0	0	0	0	0	0	0	0	0	0	0	0	0	8.92316	8.92316	8.92316	8.92316	8.92316	8.92316	8.92316	8.92316	8.92316
chr1:134604442-134605875+	2	0	0	0	0	0	0	0	0	0	0	0	0	0	0	0	0	0	0	0	1	0	0	0	0	0	1	0	0	1	0	0	0	0	0	0	0	0	0	0	9.7694	8.92316	8.92316	8.92316	8.92316	8.92316	8.92316	8.92316	8.92316
chr1:134834435-134842733-	2	0	0	0	1	0	0	2	0	1	0	0	0	0	0	0	0	0	0	0	0	0	0	0	0	0	0	0	0	0	0	1	0	2	0	0	0	0	0	0	9.7694	8.92316	8.92316	8.92316	9.48822	8.92316	8.92316	9.95773	8.92316
chr1:134834435-134865960-	0	0	0	0	0	0	0	0	0	0	0	0	0	0	0	0	0	0	0	0	0	0	0	0	0	0	0	0	0	0	0	0	0	0	0	2	0	0	0	0	8.92316	8.92316	8.92316	8.92316	8.92316	8.92316	8.92316	8.92316	8.92316
chr1:134865778-134879745-	0	0	2	1	0	0	1	0	0	0	0	0	0	0	0	1	0	0	0	0	0	0	0	0	0	0	0	0	0	0	0	0	0	0	0	0	0	0	0	0	8.92316	8.92316	9.89315	9.48344	8.92316	8.92316	9.49805	8.92316	8.92316
chr1:135155790-135156022+	0	0	0	0	0	0	0	0	0	0	0	3	0	0	0	0	0	0	0	0	0	0	0	0	0	0	0	0	0	0	0	0	0	0	0	0	0	0	0	0	8.92316	8.92316	8.92316	8.92316	8.92316	8.92316	8.92316	8.92316	8.92316
chr1:135304430-135309198-	0	1	0	0	0	0	0	0	0	0	0	0	0	0	0	0	0	0	0	0	1	1	0	2	0	0	0	1	4	0	0	0	0	0	0	0	0	0	0	0	8.92316	9.47834	8.92316	8.92316	8.92316	8.92316	8.92316	8.92316	8.92316
chr1:135406517-135425986-	0	0	0	0	0	0	0	0	0	0	0	0	0	0	0	0	0	0	4	1	0	0	0	0	0	0	0	0	0	0	0	0	0	0	0	0	0	0	0	0	8.92316	8.92316	8.92316	8.92316	8.92316	8.92316	8.92316	8.92316	8.92316
chr1:135532349-135625345-	0	0	0	0	0	0	0	0	0	0	0	0	0	0	0	0	0	0	0	0	0	0	0	0	0	0	0	0	0	0	0	0	0	0	0	0	0	3	0	0	8.92316	8.92316	8.92316	8.92316	8.92316	8.92316	8.92316	8.92316	8.92316
chr1:135658299-135660269-	0	0	0	0	0	0	0	0	0	0	0	2	0	1	0	0	0	0	0	0	0	0	0	0	0	0	0	0	0	0	0	0	0	0	0	0	0	0	0	0	8.92316	8.92316	8.92316	8.92316	8.92316	8.92316	8.92316	8.92316	8.92316
chr1:135735486-135735704+	0	0	0	0	0	0	0	0	0	0	0	0	0	0	0	0	0	0	2	0	0	0	0	0	0	0	0	0	0	0	0	0	0	0	0	0	2	0	0	1	8.92316	8.92316	8.92316	8.92316	8.92316	8.92316	8.92316	8.92316	8.92316
chr1:135751193-135751393+	0	0	0	0	0	0	0	0	0	0	0	0	0	0	2	0	0	0	0	0	0	0	0	0	0	0	0	0	0	0	0	0	0	0	0	0	0	0	0	0	8.92316	8.92316	8.92316	8.92316	8.92316	8.92316	8.92316	8.92316	8.92316
chr1:135827254-135832337+	0	0	0	0	0	0	0	0	0	0	0	2	0	0	0	0	0	0	0	0	0	0	0	0	0	0	0	0	0	0	0	0	0	0	0	0	0	0	0	0	8.92316	8.92316	8.92316	8.92316	8.92316	8.92316	8.92316	8.92316	8.92316
chr1:136174499-136174793+	0	0	0	0	0	0	0	0	0	0	0	0	0	0	0	0	0	0	0	0	0	0	0	0	0	0	2	0	0	1	0	0	0	0	0	0	0	0	0	0	8.92316	8.92316	8.92316	8.92316	8.92316	8.92316	8.92316	8.92316	8.92316
chr1:136175138-136175375+	0	0	2	0	0	0	0	0	0	0	0	0	0	0	0	0	0	0	0	0	0	0	0	0	0	0	0	0	0	0	0	0	0	0	0	0	0	0	0	0	8.92316	8.92316	9.89315	8.92316	8.92316	8.92316	8.92316	8.92316	8.92316
chr1:136292880-136304456-	0	0	0	0	0	0	0	0	0	0	0	0	0	0	0	0	0	0	0	0	2	0	0	0	0	0	0	0	0	1	0	0	0	0	0	0	0	0	0	0	8.92316	8.92316	8.92316	8.92316	8.92316	8.92316	8.92316	8.92316	8.92316
chr1:136468789-136468938+	0	0	1	0	0	0	0	1	1	0	0	0	0	0	0	0	0	0	0	0	0	0	1	0	2	0	0	0	0	1	0	0	0	0	0	0	0	0	0	0	8.92316	8.92316	9.48818	8.92316	8.92316	8.92316	8.92316	9.53126	9.49515
chr1:136502647-136513822+	0	0	0	0	0	0	0	0	0	0	0	0	0	0	0	0	1	0	0	0	0	3	0	0	0	0	0	0	0	0	0	0	0	0	0	0	0	0	0	0	8.92316	8.92316	8.92316	8.92316	8.92316	8.92316	8.92316	8.92316	8.92316
chr1:136882264-136890802-	1	0	0	0	0	3	0	0	0	0	0	0	0	0	0	0	0	0	0	0	0	0	0	0	0	0	0	0	0	0	0	0	0	0	0	0	0	0	0	0	9.40746	8.92316	8.92316	8.92316	8.92316	10.3237	8.92316	8.92316	8.92316
chr1:137033969-137074595+	0	0	0	0	0	0	0	0	0	0	0	0	0	0	0	0	0	0	0	0	0	0	0	0	0	0	0	0	0	0	1	0	3	0	1	0	0	0	0	0	8.92316	8.92316	8.92316	8.92316	8.92316	8.92316	8.92316	8.92316	8.92316
chr1:137918972-137933021+	0	0	0	0	0	0	0	0	0	0	0	0	0	0	0	0	0	0	0	0	0	0	0	0	0	2	0	0	0	0	0	0	0	0	0	0	0	0	0	0	8.92316	8.92316	8.92316	8.92316	8.92316	8.92316	8.92316	8.92316	8.92316
chr1:137960533-137960913+	0	0	0	0	0	0	0	0	0	0	0	0	0	0	0	0	0	0	0	0	0	0	0	0	0	0	0	0	0	0	1	0	2	0	0	0	0	0	0	0	8.92316	8.92316	8.92316	8.92316	8.92316	8.92316	8.92316	8.92316	8.92316
chr1:138088503-138113779-	0	0	0	0	0	0	0	0	0	0	0	0	0	0	0	0	0	0	0	0	0	0	0	0	2	0	0	0	0	0	0	0	0	0	0	0	0	0	0	0	8.92316	8.92316	8.92316	8.92316	8.92316	8.92316	8.92316	8.92316	8.92316
chr1:138515625-138561785-	0	0	2	0	0	0	0	0	0	0	0	0	0	0	0	0	0	0	0	0	0	0	0	0	0	0	0	0	0	0	0	0	0	1	0	0	0	0	0	0	8.92316	8.92316	9.89315	8.92316	8.92316	8.92316	8.92316	8.92316	8.92316
chr1:138966166-139062971+	0	0	0	2	0	0	0	0	0	0	0	0	0	0	0	0	0	0	0	0	0	0	0	0	0	0	0	0	0	0	0	0	0	0	0	0	0	0	0	0	8.92316	8.92316	8.92316	9.88598	8.92316	8.92316	8.92316	8.92316	8.92316
chr1:139020849-139062971+	0	0	0	0	0	0	0	0	0	0	0	0	0	0	0	0	0	0	0	0	0	0	0	0	0	0	0	0	2	0	0	0	0	0	0	0	0	0	0	0	8.92316	8.92316	8.92316	8.92316	8.92316	8.92316	8.92316	8.92316	8.92316
chr1:139023105-139042043+	0	0	0	0	0	0	0	0	0	0	0	0	0	0	0	0	0	0	0	0	0	2	0	0	0	0	0	0	0	0	0	0	0	0	0	0	0	0	0	0	8.92316	8.92316	8.92316	8.92316	8.92316	8.92316	8.92316	8.92316	8.92316
chr1:139023105-139062971+	0	0	0	1	1	1	0	0	0	0	3	1	0	0	1	0	0	0	0	0	1	0	0	5	0	0	0	0	0	0	0	0	1	2	0	0	0	0	1	1	8.92316	8.92316	8.92316	9.48344	9.48822	9.5523	8.92316	8.92316	8.92316
chr1:139040000-139042043+	0	1	0	0	0	0	0	0	0	0	0	0	0	0	0	0	0	0	2	0	0	3	0	0	0	0	0	0	0	0	0	0	0	0	0	0	1	2	0	1	8.92316	9.47834	8.92316	8.92316	8.92316	8.92316	8.92316	8.92316	8.92316
chr1:139040000-139054621+	1	0	0	0	0	0	0	0	0	0	0	0	0	0	0	0	0	0	0	0	0	0	0	0	0	0	0	0	2	0	0	0	0	0	0	0	3	0	0	1	9.40746	8.92316	8.92316	8.92316	8.92316	8.92316	8.92316	8.92316	8.92316
chr1:139040000-139062971+	7	6	4	4	4	1	1	2	4	3	1	3	2	3	0	3	8	1	6	1	11	4	4	6	4	4	3	3	13	0	3	2	3	10	4	6	7	3	11	8	10.8462	10.8553	10.468	10.4583	10.468	9.5523	9.49805	9.95773	10.4821
chr1:139040000-139081273+	0	0	0	0	0	0	0	0	0	0	0	0	0	0	0	0	0	0	0	0	0	0	0	0	0	0	0	0	0	0	0	0	0	0	2	0	0	0	0	0	8.92316	8.92316	8.92316	8.92316	8.92316	8.92316	8.92316	8.92316	8.92316
chr1:139040000-139090555+	0	0	0	0	1	0	1	0	0	1	0	0	0	0	0	0	0	3	0	0	0	0	0	0	1	0	1	0	0	1	0	0	0	0	0	0	0	0	0	0	8.92316	8.92316	8.92316	8.92316	9.48822	8.92316	9.49805	8.92316	8.92316
chr1:139040000-139110485+	1	0	0	2	0	0	0	0	0	0	0	0	0	0	0	0	0	0	1	0	0	0	0	0	0	0	0	0	0	0	0	0	0	1	0	0	1	0	0	0	9.40746	8.92316	8.92316	9.88598	8.92316	8.92316	8.92316	8.92316	8.92316
chr1:139040000-139133761+	0	0	0	0	0	0	0	0	2	0	0	0	0	0	0	0	0	0	0	0	0	0	0	0	0	0	0	0	0	0	0	0	0	0	0	0	0	0	0	0	8.92316	8.92316	8.92316	8.92316	8.92316	8.92316	8.92316	8.92316	9.90366
chr1:139053346-139062971+	14	10	7	5	10	4	6	6	11	3	7	7	6	9	0	5	6	7	8	3	12	9	9	5	9	6	5	6	8	3	7	8	4	11	6	5	0	4	12	5	11.6423	11.4325	11.0461	10.6771	11.4579	10.5952	10.9004	10.9747	11.5904
chr1:139053346-139090555+	0	0	0	1	2	0	0	0	0	0	0	0	0	1	0	1	0	0	0	1	0	0	1	1	0	0	0	0	0	0	0	2	0	5	0	0	0	0	0	0	8.92316	8.92316	8.92316	9.48344	9.89321	8.92316	8.92316	8.92316	8.92316
chr1:139053346-139102093+	0	0	0	0	0	0	0	0	0	0	0	0	0	0	0	0	0	0	0	0	0	0	0	0	0	0	0	0	0	0	0	0	0	0	0	0	2	0	3	0	8.92316	8.92316	8.92316	8.92316	8.92316	8.92316	8.92316	8.92316	8.92316
chr1:139053346-139110485+	0	0	4	1	0	0	0	1	1	0	0	0	0	0	0	1	2	0	1	0	1	1	0	1	0	0	0	0	0	0	0	1	0	0	0	1	0	0	1	0	8.92316	8.92316	10.468	9.48344	8.92316	8.92316	8.92316	9.53126	9.49515
chr1:139054541-139062971+	0	0	0	0	0	0	0	0	0	0	0	0	0	0	0	0	0	0	0	0	0	0	1	0	0	0	0	0	0	0	0	0	0	0	1	0	1	0	0	2	8.92316	8.92316	8.92316	8.92316	8.92316	8.92316	8.92316	8.92316	8.92316
chr1:139054541-139102093+	0	0	0	0	0	0	0	0	0	0	0	0	2	0	0	0	0	0	0	0	0	0	0	0	0	0	0	0	0	0	0	0	0	0	0	0	0	1	0	0	8.92316	8.92316	8.92316	8.92316	8.92316	8.92316	8.92316	8.92316	8.92316
chr1:139059067-139110485+	1	1	0	0	0	0	0	0	0	0	0	0	0	0	0	0	0	0	1	0	2	0	0	2	0	2	0	0	0	0	0	3	0	1	0	0	0	0	1	0	9.40746	9.47834	8.92316	8.92316	8.92316	8.92316	8.92316	8.92316	8.92316
chr1:139060275-139110485+	0	0	3	1	0	0	0	1	0	0	1	0	0	0	3	0	0	0	0	0	1	0	1	0	0	0	0	1	2	0	0	0	0	1	2	0	0	0	0	1	8.92316	8.92316	10.209	9.48344	8.92316	8.92316	8.92316	9.53126	8.92316
chr1:139081173-139110485+	1	1	4	2	0	6	1	3	4	4	1	2	2	0	0	0	1	5	1	2	4	3	0	2	0	2	0	0	2	1	6	2	3	1	0	4	0	4	1	1	9.40746	9.47834	10.468	9.88598	8.92316	11.0207	9.49805	10.2865	10.4821
chr1:139081173-139133761+	0	0	0	2	0	0	0	0	0	0	0	0	0	0	0	0	0	1	0	0	0	0	0	0	0	0	1	0	0	0	0	0	0	0	0	0	0	0	0	0	8.92316	8.92316	8.92316	9.88598	8.92316	8.92316	8.92316	8.92316	8.92316
chr1:139085883-139102093+	0	0	0	0	0	1	0	0	0	2	0	0	0	0	0	0	0	0	0	0	0	0	0	0	0	0	2	0	1	1	0	0	0	0	0	0	0	0	0	0	8.92316	8.92316	8.92316	8.92316	8.92316	9.5523	8.92316	8.92316	8.92316
chr1:139085883-139110485+	6	1	0	0	1	0	1	0	0	0	0	0	0	0	0	0	0	0	0	0	0	0	1	0	3	1	0	0	0	0	0	2	4	0	0	3	3	0	0	0	10.6859	9.47834	8.92316	8.92316	9.48822	8.92316	9.49805	8.92316	8.92316
chr1:139090454-139110485+	2	0	0	0	0	0	0	0	0	0	0	0	0	0	0	0	0	0	0	0	0	0	0	0	0	0	0	0	0	0	0	0	0	0	0	0	0	0	0	0	9.7694	8.92316	8.92316	8.92316	8.92316	8.92316	8.92316	8.92316	8.92316
chr1:140351208-140383334+	0	0	0	0	0	0	0	0	0	0	0	0	0	0	0	0	0	0	0	0	0	0	0	0	0	0	0	0	0	0	0	2	0	1	0	0	0	0	0	0	8.92316	8.92316	8.92316	8.92316	8.92316	8.92316	8.92316	8.92316	8.92316
chr1:140362949-140383095+	2	2	0	0	3	1	0	1	1	1	1	0	0	0	0	0	0	2	0	1	5	1	0	0	0	0	0	0	1	0	0	0	0	1	1	1	0	0	0	0	9.7694	9.87826	8.92316	8.92316	10.2091	9.5523	8.92316	9.53126	9.49515
chr1:140362949-140383334+	0	0	0	0	0	0	0	0	0	0	0	0	0	0	0	0	0	0	0	0	0	0	2	0	0	0	0	0	0	0	0	0	0	0	0	0	0	0	0	0	8.92316	8.92316	8.92316	8.92316	8.92316	8.92316	8.92316	8.92316	8.92316
chr1:140362949-140431433+	0	0	0	0	0	0	0	0	0	0	0	0	0	0	0	0	0	0	0	0	0	0	0	3	0	0	0	0	0	0	0	0	0	0	0	0	0	0	0	0	8.92316	8.92316	8.92316	8.92316	8.92316	8.92316	8.92316	8.92316	8.92316
chr1:140362949-140450304+	2	1	0	0	2	0	0	0	0	0	0	1	0	0	0	0	0	0	0	0	0	0	1	0	0	0	0	0	0	0	0	0	0	0	0	0	0	0	0	0	9.7694	9.47834	8.92316	8.92316	9.89321	8.92316	8.92316	8.92316	8.92316
chr1:140425193-140431433+	1	0	0	0	0	0	0	0	0	0	0	0	0	0	0	0	0	0	0	0	0	0	0	2	0	0	0	0	0	0	0	0	0	0	0	0	0	0	0	0	9.40746	8.92316	8.92316	8.92316	8.92316	8.92316	8.92316	8.92316	8.92316
chr1:143667625-143677855-	2	4	0	0	0	0	0	0	0	0	0	0	1	0	0	0	2	0	0	0	1	0	2	2	0	0	1	0	5	0	0	0	1	3	1	1	1	1	6	1	9.7694	10.4479	8.92316	8.92316	8.92316	8.92316	8.92316	8.92316	8.92316
chr1:143691275-143699322-	0	0	0	0	0	0	2	0	0	0	0	0	0	0	0	0	0	0	0	0	0	0	0	0	0	0	0	0	0	0	0	0	0	0	0	0	0	1	0	0	8.92316	8.92316	8.92316	8.92316	8.92316	8.92316	9.90803	8.92316	8.92316
chr1:143759943-143760466-	0	0	0	0	0	0	0	0	0	0	0	0	0	0	0	0	0	0	0	0	0	0	0	0	0	0	0	0	0	0	2	0	1	0	0	0	0	0	0	0	8.92316	8.92316	8.92316	8.92316	8.92316	8.92316	8.92316	8.92316	8.92316
chr1:149840618-149842359-	0	0	0	0	0	0	0	0	0	0	0	0	0	0	0	0	0	0	0	0	0	0	0	0	0	0	0	0	0	0	2	0	1	0	0	0	0	0	0	0	8.92316	8.92316	8.92316	8.92316	8.92316	8.92316	8.92316	8.92316	8.92316
chr1:149851267-149865253-	0	3	0	0	1	0	0	0	0	0	0	0	0	0	0	0	0	0	0	0	0	0	0	0	0	0	0	0	0	0	0	0	0	0	0	0	0	0	0	0	8.92316	10.191	8.92316	8.92316	9.48822	8.92316	8.92316	8.92316	8.92316
chr1:149879990-149902442-	0	0	0	0	0	0	0	0	0	0	0	0	1	0	0	0	0	0	0	0	0	0	1	0	2	0	0	0	0	0	0	0	0	0	0	0	0	0	0	0	8.92316	8.92316	8.92316	8.92316	8.92316	8.92316	8.92316	8.92316	8.92316
chr1:149901100-149902442-	0	1	0	0	0	0	0	0	0	1	0	0	0	0	0	1	1	0	0	0	0	0	0	1	0	1	0	0	0	0	0	1	0	2	0	0	0	0	0	0	8.92316	9.47834	8.92316	8.92316	8.92316	8.92316	8.92316	8.92316	8.92316
chr1:149945043-149945550-	0	0	0	0	0	0	0	0	0	0	0	0	0	0	0	0	0	0	0	0	0	0	0	0	0	0	0	0	2	0	0	0	0	0	0	0	0	0	0	0	8.92316	8.92316	8.92316	8.92316	8.92316	8.92316	8.92316	8.92316	8.92316
chr1:149946543-149946988-	0	0	0	0	0	0	0	0	0	0	0	0	0	0	0	0	0	0	0	0	0	0	0	2	0	0	0	0	0	0	0	0	0	0	0	0	0	0	0	0	8.92316	8.92316	8.92316	8.92316	8.92316	8.92316	8.92316	8.92316	8.92316
chr1:150372029-150375624-	0	0	2	1	0	0	0	0	0	0	0	0	0	0	0	0	0	0	0	0	0	0	0	0	0	0	0	0	0	0	0	0	0	0	0	0	0	0	0	0	8.92316	8.92316	9.89315	9.48344	8.92316	8.92316	8.92316	8.92316	8.92316
chr1:150406462-150407577+	0	0	0	0	0	0	1	0	2	0	0	0	0	0	0	0	1	0	4	0	1	0	0	0	1	0	3	1	0	2	2	0	0	0	0	2	2	0	0	0	8.92316	8.92316	8.92316	8.92316	8.92316	8.92316	9.49805	8.92316	9.90366
chr1:150428120-150429545+	3	0	0	0	0	0	0	0	0	0	1	0	1	0	0	1	0	0	0	0	1	0	1	0	0	0	1	0	0	0	0	1	0	0	0	0	0	0	0	0	10.0585	8.92316	8.92316	8.92316	8.92316	8.92316	8.92316	8.92316	8.92316
chr1:150431736-150432880+	0	0	0	0	0	0	0	0	0	0	0	0	0	0	0	0	0	0	0	0	0	0	0	0	0	2	0	0	0	0	0	0	0	0	0	0	0	0	0	0	8.92316	8.92316	8.92316	8.92316	8.92316	8.92316	8.92316	8.92316	8.92316
chr1:150655793-150658640-	0	0	0	0	0	0	0	0	0	0	0	0	0	0	0	0	0	0	2	0	0	0	0	0	0	0	0	0	0	0	0	0	0	0	0	0	0	0	0	0	8.92316	8.92316	8.92316	8.92316	8.92316	8.92316	8.92316	8.92316	8.92316
chr1:151384317-151405545-	0	1	0	0	0	0	0	0	0	0	0	0	0	0	0	0	0	0	0	0	0	0	0	0	0	0	0	0	0	0	0	0	0	0	3	0	0	0	0	0	8.92316	9.47834	8.92316	8.92316	8.92316	8.92316	8.92316	8.92316	8.92316
chr1:151388620-151397351-	0	0	0	0	0	0	4	0	0	0	0	0	0	0	0	0	0	0	0	0	0	0	0	0	0	0	0	0	0	0	0	0	0	0	0	0	0	0	0	0	8.92316	8.92316	8.92316	8.92316	8.92316	8.92316	10.4879	8.92316	8.92316
chr1:151388620-151405545-	0	0	0	0	0	0	0	0	3	0	0	0	0	0	0	0	0	0	0	0	0	0	0	0	0	0	0	0	0	0	0	0	0	0	0	0	0	0	0	0	8.92316	8.92316	8.92316	8.92316	8.92316	8.92316	8.92316	8.92316	10.2217
chr1:151401080-151403896-	0	2	0	0	1	0	0	0	0	0	0	0	0	0	0	0	0	0	0	0	0	0	1	0	0	0	0	1	0	0	0	0	0	0	0	0	0	0	0	0	8.92316	9.87826	8.92316	8.92316	9.48822	8.92316	8.92316	8.92316	8.92316
chr1:151401080-151405545-	1	3	0	0	0	0	0	0	0	0	0	0	0	0	0	0	0	0	0	0	0	0	0	0	0	0	0	0	0	0	0	0	0	0	0	2	0	0	0	0	9.40746	10.191	8.92316	8.92316	8.92316	8.92316	8.92316	8.92316	8.92316
chr1:151402955-151423605-	0	0	2	0	0	0	0	0	0	0	0	0	0	0	0	0	0	0	0	0	0	0	0	0	0	0	0	0	0	0	0	0	0	0	0	2	0	0	0	0	8.92316	8.92316	9.89315	8.92316	8.92316	8.92316	8.92316	8.92316	8.92316
chr1:151407576-151422120-	0	0	0	0	0	0	0	0	0	0	0	0	0	0	0	0	0	0	0	0	0	0	0	0	0	0	0	0	0	0	0	0	0	0	0	2	0	0	0	0	8.92316	8.92316	8.92316	8.92316	8.92316	8.92316	8.92316	8.92316	8.92316
chr1:151439516-151443326+	0	0	0	0	1	0	0	0	0	0	0	0	0	0	1	0	0	0	0	0	2	0	0	0	2	0	0	0	0	1	0	1	0	0	0	0	2	0	2	2	8.92316	8.92316	8.92316	8.92316	9.48822	8.92316	8.92316	8.92316	8.92316
chr1:151452048-151454051+	0	0	0	0	0	0	2	0	0	0	0	0	0	0	0	0	0	0	0	0	0	0	0	1	0	0	0	0	0	0	0	0	0	0	0	0	0	0	0	0	8.92316	8.92316	8.92316	8.92316	8.92316	8.92316	9.90803	8.92316	8.92316
chr1:151476140-151478625-	0	4	1	1	1	1	0	0	0	1	0	0	0	0	0	0	0	1	2	0	2	1	2	0	0	0	1	2	0	2	0	0	0	1	0	0	2	1	1	2	8.92316	10.4479	9.48818	9.48344	9.48822	9.5523	8.92316	8.92316	8.92316
chr1:151636506-151641559+	0	0	0	0	0	0	0	0	0	0	0	0	0	0	0	0	0	0	0	0	0	0	0	0	0	0	0	0	0	0	0	0	0	0	0	2	0	0	0	0	8.92316	8.92316	8.92316	8.92316	8.92316	8.92316	8.92316	8.92316	8.92316
chr1:151641428-151649443+	0	0	0	0	0	0	0	2	0	0	0	0	0	0	0	0	0	0	0	0	0	0	0	0	0	0	0	0	0	0	0	0	0	0	0	0	0	0	0	0	8.92316	8.92316	8.92316	8.92316	8.92316	8.92316	8.92316	9.95773	8.92316
chr1:151689519-151717495+	0	0	0	0	0	0	0	0	0	0	0	0	0	0	0	0	0	0	0	0	0	0	0	0	0	0	0	0	4	0	0	0	0	0	2	0	0	0	0	0	8.92316	8.92316	8.92316	8.92316	8.92316	8.92316	8.92316	8.92316	8.92316
chr1:151695690-151709204+	0	0	0	2	0	0	0	0	0	0	0	0	0	0	0	0	0	0	0	0	0	0	0	0	0	0	1	0	0	0	0	0	0	0	0	0	0	0	0	0	8.92316	8.92316	8.92316	9.88598	8.92316	8.92316	8.92316	8.92316	8.92316
chr1:151719193-151719901+	0	0	0	0	0	0	0	0	0	0	2	0	0	0	0	0	0	0	0	0	0	0	0	0	0	0	0	0	0	0	0	0	0	0	0	0	0	0	0	0	8.92316	8.92316	8.92316	8.92316	8.92316	8.92316	8.92316	8.92316	8.92316
chr1:151719652-151719906+	0	0	0	0	0	0	0	0	0	0	0	0	2	0	0	0	0	0	0	0	0	0	0	0	0	0	0	0	0	0	0	0	0	0	0	0	0	0	0	0	8.92316	8.92316	8.92316	8.92316	8.92316	8.92316	8.92316	8.92316	8.92316
chr1:151720394-151721480+	0	0	0	0	0	0	0	1	0	3	0	0	0	0	0	0	0	0	0	0	0	0	0	0	0	0	0	0	0	0	0	0	0	0	0	0	0	0	0	0	8.92316	8.92316	8.92316	8.92316	8.92316	8.92316	8.92316	9.53126	8.92316
chr1:151720692-151720967+	0	0	0	0	0	0	0	0	0	0	0	0	0	0	0	0	0	0	0	0	0	0	0	0	0	0	0	1	2	0	0	0	0	0	0	0	0	0	0	0	8.92316	8.92316	8.92316	8.92316	8.92316	8.92316	8.92316	8.92316	8.92316
chr1:152069704-152070051-	0	0	0	0	0	0	0	0	0	0	0	0	0	0	2	0	0	0	0	0	0	0	0	0	0	0	0	0	0	0	0	0	0	0	0	0	0	0	0	0	8.92316	8.92316	8.92316	8.92316	8.92316	8.92316	8.92316	8.92316	8.92316
chr1:152840035-152870791-	0	0	0	0	0	0	0	0	0	0	0	0	0	0	0	0	0	0	0	0	0	0	0	0	0	0	0	0	0	0	2	0	0	0	1	0	0	0	0	0	8.92316	8.92316	8.92316	8.92316	8.92316	8.92316	8.92316	8.92316	8.92316
chr1:152841025-152856611-	2	0	1	1	0	0	0	0	0	0	0	0	0	0	0	0	0	0	0	0	0	0	0	0	0	0	0	0	0	0	0	0	0	0	0	0	0	0	0	0	9.7694	8.92316	9.48818	9.48344	8.92316	8.92316	8.92316	8.92316	8.92316
chr1:152845213-152846263-	0	0	0	0	0	2	0	0	0	0	0	0	0	0	0	0	0	0	0	0	0	0	0	0	0	0	0	0	0	0	0	0	0	0	0	0	0	0	0	0	8.92316	8.92316	8.92316	8.92316	8.92316	9.98893	8.92316	8.92316	8.92316
chr1:152848734-152849994-	0	0	0	0	0	0	2	0	0	0	0	0	0	0	0	0	0	0	0	0	0	0	0	0	0	0	0	0	0	0	0	0	0	0	0	0	0	0	0	0	8.92316	8.92316	8.92316	8.92316	8.92316	8.92316	9.90803	8.92316	8.92316
chr1:152854310-152856611-	0	0	2	0	2	0	0	1	0	0	0	0	0	0	0	0	0	0	0	0	1	2	0	0	0	1	0	1	2	0	0	1	0	1	0	0	0	0	0	0	8.92316	8.92316	9.89315	8.92316	9.89321	8.92316	8.92316	9.53126	8.92316
chr1:152854310-152861852-	0	0	0	0	0	0	0	0	0	0	0	0	0	0	0	0	0	2	0	0	0	0	0	0	0	0	0	0	0	0	0	0	0	0	0	0	0	0	0	0	8.92316	8.92316	8.92316	8.92316	8.92316	8.92316	8.92316	8.92316	8.92316
chr1:153220085-153220705-	0	0	0	0	0	0	0	0	0	0	0	0	0	0	0	0	0	0	0	0	0	0	0	2	0	0	0	0	0	0	0	0	0	0	0	0	0	0	0	0	8.92316	8.92316	8.92316	8.92316	8.92316	8.92316	8.92316	8.92316	8.92316
chr1:153220337-153220770-	0	2	0	0	0	0	0	0	0	0	0	0	0	0	0	0	0	0	0	0	0	0	0	0	0	0	0	0	0	0	0	0	0	0	0	0	0	0	0	0	8.92316	9.87826	8.92316	8.92316	8.92316	8.92316	8.92316	8.92316	8.92316
chr1:153471620-153483872-	1	0	0	0	0	0	0	0	0	0	0	0	2	0	0	0	0	0	0	0	0	0	0	0	0	0	0	0	0	0	0	0	0	0	0	0	0	0	0	0	9.40746	8.92316	8.92316	8.92316	8.92316	8.92316	8.92316	8.92316	8.92316
chr1:153482742-153483872-	0	0	0	1	0	0	1	0	0	0	0	0	0	0	0	0	0	0	0	0	2	0	0	0	0	1	0	0	0	0	0	0	0	0	0	0	0	0	0	0	8.92316	8.92316	8.92316	9.48344	8.92316	8.92316	9.49805	8.92316	8.92316
chr1:153908163-153908351+	0	0	0	0	0	0	0	0	0	0	1	2	0	1	0	0	0	0	0	0	0	0	0	0	0	0	0	0	0	0	0	0	0	0	0	0	0	0	0	0	8.92316	8.92316	8.92316	8.92316	8.92316	8.92316	8.92316	8.92316	8.92316
chr1:154633554-154635860-	0	0	0	0	0	0	0	0	0	0	0	0	0	0	0	0	0	0	0	0	2	0	0	0	0	0	0	0	0	0	0	0	0	0	0	0	0	0	0	0	8.92316	8.92316	8.92316	8.92316	8.92316	8.92316	8.92316	8.92316	8.92316
chr1:154700371-154725920-	0	0	0	0	0	0	0	0	0	0	0	0	0	0	1	0	0	0	0	0	0	0	0	0	0	0	0	0	0	0	0	1	0	0	0	0	3	0	0	2	8.92316	8.92316	8.92316	8.92316	8.92316	8.92316	8.92316	8.92316	8.92316
chr1:155173986-155197435+	5	4	1	4	1	1	3	2	6	0	1	4	0	1	2	2	1	14	6	1	4	6	1	5	3	5	1	0	2	2	8	1	7	2	3	2	3	0	0	6	10.5055	10.4479	9.48818	10.4583	9.48822	9.5523	10.2269	9.95773	10.8938
chr1:155187778-155197435+	0	0	0	0	0	0	0	0	0	0	0	1	1	0	0	0	0	0	0	0	0	1	0	0	0	0	2	0	0	0	0	2	0	0	0	0	0	0	0	0	8.92316	8.92316	8.92316	8.92316	8.92316	8.92316	8.92316	8.92316	8.92316
chr1:155324314-155345654-	2	0	0	2	0	0	0	0	0	0	0	0	0	0	0	0	0	0	0	0	0	0	0	0	0	0	0	0	0	0	0	0	0	0	0	0	0	0	0	0	9.7694	8.92316	8.92316	9.88598	8.92316	8.92316	8.92316	8.92316	8.92316
chr1:155601454-155624958+	0	1	2	0	1	0	0	1	0	0	0	0	0	1	0	0	0	0	0	0	0	0	1	0	1	1	1	0	1	0	0	0	0	0	0	0	0	0	0	0	8.92316	9.47834	9.89315	8.92316	9.48822	8.92316	8.92316	9.53126	8.92316
chr1:155615867-155624958+	0	0	0	0	0	0	0	0	0	2	0	0	0	0	0	0	0	0	0	0	1	2	0	0	0	0	0	0	0	0	0	0	0	0	0	0	0	2	0	0	8.92316	8.92316	8.92316	8.92316	8.92316	8.92316	8.92316	8.92316	8.92316
chr1:155845866-155846464-	0	0	0	0	0	0	0	0	0	0	0	0	0	0	0	0	0	0	0	0	0	0	0	0	0	3	0	0	0	0	0	0	0	0	0	0	0	0	0	0	8.92316	8.92316	8.92316	8.92316	8.92316	8.92316	8.92316	8.92316	8.92316
chr1:155847110-155848727-	0	0	0	0	0	0	0	0	1	0	0	2	0	0	0	0	0	0	0	0	0	0	0	0	0	0	0	0	0	0	0	0	0	0	0	0	0	0	0	0	8.92316	8.92316	8.92316	8.92316	8.92316	8.92316	8.92316	8.92316	9.49515
chr1:155848169-155862002-	0	0	0	0	0	0	0	0	0	0	0	0	0	0	0	0	0	0	0	0	0	0	0	0	0	0	2	0	0	0	0	0	0	0	0	0	0	0	0	0	8.92316	8.92316	8.92316	8.92316	8.92316	8.92316	8.92316	8.92316	8.92316
chr1:155866040-155879118-	0	0	0	0	0	0	0	0	0	0	0	0	0	0	0	0	0	0	0	0	0	0	0	0	0	0	0	0	0	2	0	0	0	0	0	0	0	0	0	0	8.92316	8.92316	8.92316	8.92316	8.92316	8.92316	8.92316	8.92316	8.92316
chr1:155940717-155962560-	0	0	0	0	0	0	1	0	0	0	1	0	3	0	1	0	0	0	0	0	0	0	0	1	1	1	0	0	0	1	0	0	0	0	0	1	2	0	5	2	8.92316	8.92316	8.92316	8.92316	8.92316	8.92316	9.49805	8.92316	8.92316
chr1:155953154-155962560-	5	9	1	3	4	8	12	8	8	3	2	1	2	6	2	5	5	2	3	5	9	14	8	8	5	2	7	7	4	4	4	4	3	8	6	10	8	0	10	8	10.5055	11.3084	9.48818	10.2004	10.468	11.3489	11.7045	11.3	11.2138
chr1:155958561-155962560-	3	1	0	0	3	0	0	0	1	0	1	0	0	0	0	0	0	0	0	0	0	1	1	2	0	1	1	0	0	0	0	0	0	0	0	0	0	0	3	1	10.0585	9.47834	8.92316	8.92316	10.2091	8.92316	8.92316	8.92316	9.49515
chr1:156051294-156051623+	0	0	0	0	0	2	0	0	0	0	0	0	0	0	0	0	0	0	0	0	0	0	0	0	0	0	0	0	0	0	0	0	0	0	0	0	0	0	0	0	8.92316	8.92316	8.92316	8.92316	8.92316	9.98893	8.92316	8.92316	8.92316
chr1:156051294-156059587+	0	0	0	0	0	0	0	0	0	0	0	0	0	0	0	0	0	0	0	0	0	0	0	0	0	0	0	0	0	0	1	0	2	0	1	0	0	0	0	0	8.92316	8.92316	8.92316	8.92316	8.92316	8.92316	8.92316	8.92316	8.92316
chr1:156620839-156625583+	0	0	0	0	0	0	0	0	0	0	0	0	0	0	0	0	0	0	0	0	0	0	0	1	0	0	0	0	0	0	0	0	0	0	0	0	0	0	0	3	8.92316	8.92316	8.92316	8.92316	8.92316	8.92316	8.92316	8.92316	8.92316
chr1:156625288-156631429+	0	0	0	0	0	0	0	0	0	0	0	0	0	0	0	0	0	0	0	0	0	0	0	0	0	0	0	0	0	0	0	0	0	3	0	0	0	0	0	0	8.92316	8.92316	8.92316	8.92316	8.92316	8.92316	8.92316	8.92316	8.92316
chr1:156702399-156706167-	0	0	0	0	0	0	1	0	0	0	0	0	0	0	0	0	0	0	0	0	0	2	0	0	0	0	0	0	0	0	0	0	0	0	0	0	0	0	0	0	8.92316	8.92316	8.92316	8.92316	8.92316	8.92316	9.49805	8.92316	8.92316
chr1:156869441-156888030-	0	0	0	0	0	0	0	0	0	2	2	0	0	0	0	0	0	0	0	0	0	0	0	0	0	0	0	0	0	0	0	0	0	0	0	0	3	0	0	1	8.92316	8.92316	8.92316	8.92316	8.92316	8.92316	8.92316	8.92316	8.92316
chr1:156869441-156907718-	1	0	0	0	0	0	1	0	0	0	0	0	0	0	0	0	0	1	0	0	0	0	0	0	0	0	0	0	0	0	2	1	1	0	0	0	0	0	0	0	9.40746	8.92316	8.92316	8.92316	8.92316	8.92316	9.49805	8.92316	8.92316
chr1:156869441-156907778-	3	0	4	0	0	0	4	1	1	1	0	0	1	2	0	0	5	0	0	1	0	0	0	5	0	1	2	1	1	1	0	1	0	2	1	0	2	0	0	0	10.0585	8.92316	10.468	8.92316	8.92316	8.92316	10.4879	9.53126	9.49515
chr1:156869441-156918175-	0	0	0	0	0	0	0	0	0	0	0	0	0	0	0	0	0	2	0	0	0	0	0	0	0	0	0	0	0	0	0	0	0	0	0	0	0	0	0	0	8.92316	8.92316	8.92316	8.92316	8.92316	8.92316	8.92316	8.92316	8.92316
chr1:156892908-156907778-	2	0	0	0	0	0	0	0	0	0	0	0	0	0	0	0	0	0	0	0	0	0	0	0	0	0	0	0	0	0	0	0	0	0	0	0	0	0	0	0	9.7694	8.92316	8.92316	8.92316	8.92316	8.92316	8.92316	8.92316	8.92316
chr1:156900586-156907778-	1	0	1	0	0	0	1	0	2	0	0	0	0	0	0	2	2	7	0	3	0	0	1	0	0	0	2	0	2	1	0	0	2	0	0	1	2	0	2	1	9.40746	8.92316	9.48818	8.92316	8.92316	8.92316	9.49805	8.92316	9.90366
chr1:157146190-157158837-	0	0	0	0	0	0	0	0	0	0	0	0	0	0	0	0	0	0	0	0	0	0	0	0	0	0	0	0	0	0	2	1	1	0	1	0	0	0	0	0	8.92316	8.92316	8.92316	8.92316	8.92316	8.92316	8.92316	8.92316	8.92316
chr1:157174143-157179252-	0	0	0	0	1	0	3	0	3	0	0	0	0	0	1	0	0	0	0	1	0	2	1	0	0	0	1	0	0	0	0	0	0	1	0	0	1	0	0	0	8.92316	8.92316	8.92316	8.92316	9.48822	8.92316	10.2269	8.92316	10.2217
chr1:157275635-157276117-	0	0	0	0	0	0	0	0	0	0	0	0	0	0	0	0	0	2	0	0	0	0	0	0	0	0	0	0	0	0	0	0	0	0	0	0	0	0	0	0	8.92316	8.92316	8.92316	8.92316	8.92316	8.92316	8.92316	8.92316	8.92316
chr1:157286731-157299264-	0	0	0	0	0	0	0	1	0	0	0	0	0	3	0	0	0	0	0	0	2	0	0	0	1	1	0	0	0	0	0	0	0	1	0	0	0	0	0	0	8.92316	8.92316	8.92316	8.92316	8.92316	8.92316	8.92316	9.53126	8.92316
chr1:157560747-157561003+	0	0	0	0	0	0	0	0	0	2	0	0	0	0	0	0	0	0	0	0	0	0	0	0	0	0	0	0	0	0	0	0	0	0	0	0	0	0	0	0	8.92316	8.92316	8.92316	8.92316	8.92316	8.92316	8.92316	8.92316	8.92316
chr1:158814340-158845132-	0	0	0	0	0	0	0	0	0	0	0	0	0	0	0	0	0	0	0	0	0	0	0	0	0	0	0	0	0	0	0	1	0	1	0	0	0	0	2	0	8.92316	8.92316	8.92316	8.92316	8.92316	8.92316	8.92316	8.92316	8.92316
chr1:159239562-159258742+	0	0	0	0	0	0	0	0	0	0	0	0	0	0	0	0	2	0	0	0	0	0	0	0	0	0	0	0	0	0	0	0	0	0	0	0	0	0	0	0	8.92316	8.92316	8.92316	8.92316	8.92316	8.92316	8.92316	8.92316	8.92316
chr1:159239562-159278146+	0	0	0	0	0	0	0	0	0	0	0	0	0	0	0	0	0	0	0	0	0	0	0	0	0	0	0	0	2	0	0	0	0	0	0	0	0	0	0	0	8.92316	8.92316	8.92316	8.92316	8.92316	8.92316	8.92316	8.92316	8.92316
chr1:159266757-159278146+	0	0	0	0	0	0	0	0	1	0	0	0	0	0	0	0	0	0	0	0	0	0	0	0	2	0	0	0	0	1	0	0	0	0	0	0	0	0	0	0	8.92316	8.92316	8.92316	8.92316	8.92316	8.92316	8.92316	8.92316	9.49515
chr1:159278089-159308964+	0	0	0	0	0	0	0	0	0	0	0	0	0	0	0	0	0	0	0	0	0	0	0	0	0	0	0	2	3	0	0	0	0	0	0	0	0	0	0	0	8.92316	8.92316	8.92316	8.92316	8.92316	8.92316	8.92316	8.92316	8.92316
chr1:160226485-160231867-	0	0	1	0	0	0	0	0	0	0	0	0	0	0	0	0	0	0	0	0	0	0	0	0	0	0	0	0	0	0	0	0	0	0	0	0	3	0	0	0	8.92316	8.92316	9.48818	8.92316	8.92316	8.92316	8.92316	8.92316	8.92316
chr1:160307176-160342164-	0	0	0	0	0	0	0	0	0	0	1	0	0	0	0	0	0	0	0	0	0	0	0	0	0	0	0	0	0	0	0	0	0	0	0	0	1	0	0	2	8.92316	8.92316	8.92316	8.92316	8.92316	8.92316	8.92316	8.92316	8.92316
chr1:160325442-160326399-	0	0	0	0	0	0	0	0	0	0	0	0	1	0	0	0	0	0	0	0	0	0	0	0	0	0	1	0	0	0	0	0	0	0	0	0	0	3	0	0	8.92316	8.92316	8.92316	8.92316	8.92316	8.92316	8.92316	8.92316	8.92316
chr1:160441823-160453825-	0	0	0	0	0	0	2	0	0	0	0	0	0	0	0	0	0	0	0	0	0	0	0	0	0	0	0	0	0	0	0	0	0	0	0	0	0	0	0	0	8.92316	8.92316	8.92316	8.92316	8.92316	8.92316	9.90803	8.92316	8.92316
chr1:160566289-160566510-	0	0	0	0	0	0	0	0	0	0	0	0	0	0	0	2	0	0	0	0	0	0	0	0	0	0	0	0	0	0	0	0	0	0	0	0	0	0	0	0	8.92316	8.92316	8.92316	8.92316	8.92316	8.92316	8.92316	8.92316	8.92316
chr1:160627215-160710213-	0	1	0	0	0	0	0	0	0	2	0	0	0	0	0	0	0	0	0	0	0	0	0	0	0	0	0	1	0	0	2	0	0	0	2	0	0	0	0	0	8.92316	9.47834	8.92316	8.92316	8.92316	8.92316	8.92316	8.92316	8.92316
chr1:160627215-160724189-	0	0	0	0	0	0	0	0	0	0	0	0	0	0	0	0	0	0	0	1	0	0	0	0	0	0	0	2	0	0	0	0	0	0	0	0	0	0	0	0	8.92316	8.92316	8.92316	8.92316	8.92316	8.92316	8.92316	8.92316	8.92316
chr1:160645308-160724189-	0	0	0	0	0	0	0	0	0	0	0	0	0	0	0	0	0	0	0	0	0	0	0	0	0	0	0	0	0	0	0	0	0	0	2	0	0	0	0	0	8.92316	8.92316	8.92316	8.92316	8.92316	8.92316	8.92316	8.92316	8.92316
chr1:160682041-160702460-	0	0	1	0	2	0	0	1	2	0	0	0	0	0	0	0	0	0	0	0	2	0	0	0	0	0	0	0	0	0	0	0	0	0	0	1	0	0	0	0	8.92316	8.92316	9.48818	8.92316	9.89321	8.92316	8.92316	9.53126	9.90366
chr1:160682041-160710213-	0	0	0	0	0	0	0	0	0	0	0	0	0	0	0	0	0	0	2	0	0	0	0	0	0	0	0	0	0	0	0	0	0	0	0	0	0	0	0	0	8.92316	8.92316	8.92316	8.92316	8.92316	8.92316	8.92316	8.92316	8.92316
chr1:160700712-160702460-	0	1	0	0	0	0	0	0	0	0	0	1	1	1	0	0	0	2	0	0	1	0	0	0	5	2	3	0	0	1	0	0	2	0	0	1	0	0	0	0	8.92316	9.47834	8.92316	8.92316	8.92316	8.92316	8.92316	8.92316	8.92316
chr1:160700712-160724189-	0	0	0	0	0	0	3	0	0	0	0	0	0	0	0	1	0	0	2	0	1	1	0	0	0	0	0	0	0	0	0	1	0	1	0	1	0	0	0	0	8.92316	8.92316	8.92316	8.92316	8.92316	8.92316	10.2269	8.92316	8.92316
chr1:160700712-160740931-	0	0	0	0	0	0	0	0	1	0	0	0	0	0	0	0	0	0	0	1	0	0	0	0	0	0	0	0	0	0	0	2	0	0	0	0	0	0	0	0	8.92316	8.92316	8.92316	8.92316	8.92316	8.92316	8.92316	8.92316	9.49515
chr1:160722133-160740931-	0	2	2	2	2	0	0	0	0	0	0	1	0	0	0	0	0	0	0	4	1	0	0	0	0	1	0	0	3	0	2	1	2	1	2	0	0	0	2	0	8.92316	9.87826	9.89315	9.88598	9.89321	8.92316	8.92316	8.92316	8.92316
chr1:160733529-160740931-	3	2	1	0	0	0	0	0	0	0	0	1	0	3	0	0	0	0	0	0	0	0	0	0	3	0	0	0	0	0	0	1	0	0	0	0	0	0	0	0	10.0585	9.87826	9.48818	8.92316	8.92316	8.92316	8.92316	8.92316	8.92316
chr1:160939995-160955979+	0	0	0	0	0	0	0	0	0	0	0	0	0	0	0	0	0	0	0	0	0	0	0	0	0	0	0	1	2	0	0	0	0	0	0	1	0	0	0	0	8.92316	8.92316	8.92316	8.92316	8.92316	8.92316	8.92316	8.92316	8.92316
chr1:160950841-160962484+	0	0	0	0	0	0	0	0	0	0	0	0	0	0	0	0	0	2	0	0	0	0	0	0	0	0	0	0	0	0	0	0	0	0	0	0	0	0	0	0	8.92316	8.92316	8.92316	8.92316	8.92316	8.92316	8.92316	8.92316	8.92316
chr1:160951615-160959553+	0	0	0	0	0	0	0	0	0	0	0	0	0	0	0	0	0	0	0	0	0	0	0	0	0	0	0	0	0	0	0	0	0	0	0	0	2	0	0	2	8.92316	8.92316	8.92316	8.92316	8.92316	8.92316	8.92316	8.92316	8.92316
chr1:160962271-160962484+	0	0	0	0	0	0	0	0	0	0	0	0	0	0	0	0	0	0	0	0	0	0	0	0	0	0	0	1	1	0	0	0	0	2	0	0	0	0	0	0	8.92316	8.92316	8.92316	8.92316	8.92316	8.92316	8.92316	8.92316	8.92316
chr1:161062782-161063348-	2	0	0	0	0	0	0	0	0	0	0	0	0	0	0	0	0	0	0	0	0	0	0	0	0	0	0	0	0	0	0	0	0	0	0	0	0	0	0	0	9.7694	8.92316	8.92316	8.92316	8.92316	8.92316	8.92316	8.92316	8.92316
chr1:161083066-161083421+	0	2	0	0	0	0	0	0	0	0	0	0	0	0	0	0	0	0	0	0	0	0	0	0	0	0	0	0	0	0	0	0	0	0	0	0	0	0	0	0	8.92316	9.87826	8.92316	8.92316	8.92316	8.92316	8.92316	8.92316	8.92316
chr1:161241636-161247413-	1	0	0	0	0	0	0	0	0	0	0	0	2	0	0	0	0	0	0	1	0	0	0	1	0	0	0	1	1	0	2	0	0	1	0	0	0	0	0	1	9.40746	8.92316	8.92316	8.92316	8.92316	8.92316	8.92316	8.92316	8.92316
chr1:161616699-161632396-	0	0	0	0	0	0	0	0	0	0	0	0	0	0	0	0	0	0	2	1	0	0	0	0	0	0	0	0	0	0	0	0	0	0	0	0	0	0	0	0	8.92316	8.92316	8.92316	8.92316	8.92316	8.92316	8.92316	8.92316	8.92316
chr1:161820395-161833503-	0	0	0	0	0	0	0	0	0	0	0	0	0	0	0	0	0	0	0	0	0	0	0	0	0	0	0	0	0	0	2	0	0	0	0	0	0	0	0	0	8.92316	8.92316	8.92316	8.92316	8.92316	8.92316	8.92316	8.92316	8.92316
chr1:161827657-161829340-	0	0	0	0	0	0	0	0	0	0	0	0	0	0	0	0	0	0	0	0	0	0	0	0	0	0	0	0	0	0	0	0	0	0	0	0	0	0	3	0	8.92316	8.92316	8.92316	8.92316	8.92316	8.92316	8.92316	8.92316	8.92316
chr1:161844002-161862302-	0	0	0	0	0	0	0	0	0	0	0	0	0	0	0	0	0	0	0	0	0	0	0	0	0	0	0	0	0	0	0	0	0	0	0	2	0	0	0	0	8.92316	8.92316	8.92316	8.92316	8.92316	8.92316	8.92316	8.92316	8.92316
chr1:161856821-161862302-	2	0	0	0	0	0	0	0	0	0	0	0	0	0	0	0	0	0	0	0	1	0	1	0	0	3	0	0	0	0	0	0	0	0	0	0	0	0	0	0	9.7694	8.92316	8.92316	8.92316	8.92316	8.92316	8.92316	8.92316	8.92316
chr1:162209590-162231767-	0	0	0	0	0	0	0	0	0	0	0	0	0	0	0	0	0	0	0	0	0	0	0	2	0	0	0	0	0	0	0	0	0	0	0	0	0	0	0	0	8.92316	8.92316	8.92316	8.92316	8.92316	8.92316	8.92316	8.92316	8.92316
chr1:162285997-162313696-	0	2	0	0	0	0	0	0	0	0	0	0	0	0	0	0	0	0	0	0	0	0	0	0	0	0	0	0	0	0	0	0	0	0	0	0	0	0	0	0	8.92316	9.87826	8.92316	8.92316	8.92316	8.92316	8.92316	8.92316	8.92316
chr1:162307868-162313696-	0	0	0	0	0	0	0	0	0	0	0	0	0	0	0	1	0	0	0	0	0	0	0	0	0	0	2	1	0	0	0	0	0	0	0	0	0	0	0	0	8.92316	8.92316	8.92316	8.92316	8.92316	8.92316	8.92316	8.92316	8.92316
chr1:162679826-162684256-	0	0	0	0	0	0	0	0	0	0	0	0	0	0	0	0	0	0	0	0	0	0	0	0	0	0	0	0	0	0	0	3	0	0	1	0	0	0	0	0	8.92316	8.92316	8.92316	8.92316	8.92316	8.92316	8.92316	8.92316	8.92316
chr1:162707766-162710829-	0	0	0	0	0	0	0	1	0	0	0	0	0	0	0	0	0	0	0	0	0	0	0	0	1	0	0	2	0	0	0	0	0	0	0	0	0	0	0	0	8.92316	8.92316	8.92316	8.92316	8.92316	8.92316	8.92316	9.53126	8.92316
chr1:162710283-162724869-	0	0	0	0	0	0	0	0	0	0	0	0	0	0	0	0	0	0	0	0	0	0	0	0	0	0	0	0	0	0	0	0	0	2	0	0	0	0	0	0	8.92316	8.92316	8.92316	8.92316	8.92316	8.92316	8.92316	8.92316	8.92316
chr1:162713304-162718910-	0	0	0	0	0	0	0	0	0	0	0	4	0	0	0	0	0	0	0	0	0	0	0	0	0	0	0	0	0	0	0	0	0	0	0	0	0	0	0	0	8.92316	8.92316	8.92316	8.92316	8.92316	8.92316	8.92316	8.92316	8.92316
chr1:162714243-162724869-	0	0	0	0	0	0	0	0	0	0	0	0	0	2	0	0	0	0	0	0	0	0	0	0	0	0	0	0	1	0	0	0	0	0	0	0	0	0	0	0	8.92316	8.92316	8.92316	8.92316	8.92316	8.92316	8.92316	8.92316	8.92316
chr1:162715392-162716361-	0	0	0	0	0	0	0	0	0	0	0	0	0	0	0	0	0	0	2	0	0	0	0	0	0	1	0	0	0	0	0	0	0	0	2	0	1	0	0	1	8.92316	8.92316	8.92316	8.92316	8.92316	8.92316	8.92316	8.92316	8.92316
chr1:163249408-163250220-	0	0	0	0	0	0	0	0	0	0	0	0	0	0	0	0	0	0	0	0	0	0	0	0	0	0	0	0	0	0	0	0	0	0	0	0	0	0	2	0	8.92316	8.92316	8.92316	8.92316	8.92316	8.92316	8.92316	8.92316	8.92316
chr1:163392410-163397169-	2	1	1	0	0	0	0	0	0	0	0	0	0	0	0	0	0	0	0	0	0	0	0	0	0	0	0	0	0	0	0	0	0	0	0	0	0	0	0	0	9.7694	9.47834	9.48818	8.92316	8.92316	8.92316	8.92316	8.92316	8.92316
chr1:163856036-163862836+	0	0	0	0	0	0	0	0	0	0	0	0	0	0	0	0	0	0	0	0	0	0	0	3	0	0	0	0	0	0	0	0	0	0	0	0	0	0	0	0	8.92316	8.92316	8.92316	8.92316	8.92316	8.92316	8.92316	8.92316	8.92316
chr1:163883383-163888305+	0	0	0	0	0	0	0	0	1	0	1	2	0	0	0	0	0	0	0	0	0	0	0	1	0	0	0	0	0	1	0	0	1	0	0	0	0	0	0	0	8.92316	8.92316	8.92316	8.92316	8.92316	8.92316	8.92316	8.92316	9.49515
chr1:163933479-163934817+	2	0	0	0	0	0	1	0	0	1	0	0	0	0	0	1	0	0	0	0	0	0	1	0	1	0	0	0	0	0	0	0	0	0	0	0	0	0	0	0	9.7694	8.92316	8.92316	8.92316	8.92316	8.92316	9.49805	8.92316	8.92316
chr1:163996359-163996660+	0	0	0	0	0	0	0	0	0	0	0	0	0	0	0	0	0	0	0	3	0	0	0	0	0	0	0	0	0	0	0	0	0	0	0	0	0	0	0	0	8.92316	8.92316	8.92316	8.92316	8.92316	8.92316	8.92316	8.92316	8.92316
chr1:164278174-164282537+	0	2	0	0	0	0	0	0	0	1	0	0	0	0	0	0	0	4	2	0	0	0	0	0	0	0	0	0	0	0	0	0	0	0	0	0	2	0	0	0	8.92316	9.87826	8.92316	8.92316	8.92316	8.92316	8.92316	8.92316	8.92316
chr1:164328293-164403077+	0	0	0	0	0	0	0	0	0	0	0	0	0	0	0	0	0	0	0	0	0	0	0	0	0	0	0	0	0	0	0	0	0	0	0	0	0	0	2	0	8.92316	8.92316	8.92316	8.92316	8.92316	8.92316	8.92316	8.92316	8.92316
chr1:164332612-164345426+	0	0	0	0	0	0	0	0	0	0	0	0	0	0	0	0	0	0	0	0	0	0	0	0	0	0	0	0	0	0	0	0	0	0	0	2	0	0	0	0	8.92316	8.92316	8.92316	8.92316	8.92316	8.92316	8.92316	8.92316	8.92316
chr1:164340729-164347879+	2	0	0	0	0	0	0	0	0	0	0	0	0	0	0	0	0	0	0	0	5	0	0	0	0	0	0	0	0	0	1	0	0	1	1	0	0	0	0	0	9.7694	8.92316	8.92316	8.92316	8.92316	8.92316	8.92316	8.92316	8.92316
chr1:164437745-164456249-	0	0	0	0	0	0	0	0	0	0	0	0	0	0	0	0	0	0	0	0	0	2	0	0	0	0	0	0	0	0	0	0	0	0	0	0	0	0	0	0	8.92316	8.92316	8.92316	8.92316	8.92316	8.92316	8.92316	8.92316	8.92316
chr1:164439299-164453617-	0	0	0	0	0	0	0	0	0	0	0	0	0	0	0	0	0	0	0	0	0	0	0	0	0	0	0	0	0	0	0	0	0	0	2	0	0	0	0	0	8.92316	8.92316	8.92316	8.92316	8.92316	8.92316	8.92316	8.92316	8.92316
chr1:164441575-164443330-	0	0	0	0	0	0	0	0	0	0	0	0	0	0	0	0	0	0	0	0	2	0	0	0	0	0	0	0	0	0	0	0	0	0	0	0	0	0	0	0	8.92316	8.92316	8.92316	8.92316	8.92316	8.92316	8.92316	8.92316	8.92316
chr1:164823330-164824225+	0	0	0	0	0	0	0	0	0	0	0	0	0	0	0	0	0	0	0	0	0	0	0	0	0	0	0	0	0	0	0	0	0	0	0	2	0	0	0	0	8.92316	8.92316	8.92316	8.92316	8.92316	8.92316	8.92316	8.92316	8.92316
chr1:165336745-165352076-	0	0	0	0	0	0	0	0	0	0	0	0	0	0	3	0	0	0	0	0	0	0	0	0	0	0	0	0	0	0	0	0	0	0	0	0	0	0	0	0	8.92316	8.92316	8.92316	8.92316	8.92316	8.92316	8.92316	8.92316	8.92316
chr1:165350884-165357546-	0	0	0	0	1	0	0	0	0	0	0	0	0	0	0	0	0	0	0	0	0	0	0	0	0	0	0	0	1	0	1	0	0	0	2	0	2	0	0	0	8.92316	8.92316	8.92316	8.92316	9.48822	8.92316	8.92316	8.92316	8.92316
chr1:165388658-165399868-	2	0	0	0	0	0	0	0	0	0	0	0	0	0	0	0	1	0	0	0	0	0	0	0	0	0	0	0	0	0	0	0	0	0	0	0	0	0	0	0	9.7694	8.92316	8.92316	8.92316	8.92316	8.92316	8.92316	8.92316	8.92316
chr1:165411464-165429315-	0	0	1	1	0	1	0	0	0	1	0	0	0	0	0	0	0	0	0	0	0	0	0	1	1	1	0	0	2	0	0	0	0	0	0	1	0	0	0	0	8.92316	8.92316	9.48818	9.48344	8.92316	9.5523	8.92316	8.92316	8.92316
chr1:165411464-165435759-	0	0	0	0	0	0	0	0	0	0	0	0	0	0	0	0	0	0	0	0	0	0	0	0	0	0	0	0	0	0	0	0	0	0	0	0	0	0	0	2	8.92316	8.92316	8.92316	8.92316	8.92316	8.92316	8.92316	8.92316	8.92316
chr1:165420111-165429315-	1	0	0	0	0	1	0	1	1	0	1	0	0	0	0	0	0	1	1	0	0	2	1	0	0	0	0	0	0	2	2	1	1	0	0	0	0	0	0	0	9.40746	8.92316	8.92316	8.92316	8.92316	9.5523	8.92316	9.53126	9.49515
chr1:165593391-165608604-	0	0	0	0	0	0	0	0	0	0	0	0	0	0	0	0	0	0	0	0	0	0	0	0	0	0	0	0	0	0	0	0	0	0	0	0	2	0	0	1	8.92316	8.92316	8.92316	8.92316	8.92316	8.92316	8.92316	8.92316	8.92316
chr1:165594790-165595073-	0	0	0	0	0	0	0	0	0	0	0	0	0	0	0	0	0	2	0	0	0	0	0	0	0	0	0	0	0	0	0	0	0	0	0	0	0	0	0	0	8.92316	8.92316	8.92316	8.92316	8.92316	8.92316	8.92316	8.92316	8.92316
chr1:165601750-165608604-	2	1	1	0	0	1	4	0	3	1	0	2	3	0	0	4	0	1	2	1	0	0	2	2	3	0	1	2	4	0	1	1	5	3	4	2	2	2	7	0	9.7694	9.47834	9.48818	8.92316	8.92316	9.5523	10.4879	8.92316	10.2217
chr1:165604610-165605822-	0	1	0	0	2	0	0	0	0	0	0	0	0	0	0	0	0	0	0	0	0	0	0	0	0	0	0	0	0	0	0	0	0	0	0	0	0	0	0	0	8.92316	9.47834	8.92316	8.92316	9.89321	8.92316	8.92316	8.92316	8.92316
chr1:165604610-165608604-	10	3	0	0	3	4	1	0	2	3	3	0	4	0	1	2	6	0	1	5	6	2	0	1	2	1	1	0	1	2	3	3	2	2	2	0	2	0	2	3	11.2419	10.191	8.92316	8.92316	10.2091	10.5952	9.49805	8.92316	9.90366
chr1:165655305-165665050-	0	0	0	0	0	0	0	1	0	2	0	0	0	0	0	0	0	0	1	0	0	0	0	0	0	0	0	0	0	0	0	0	0	0	0	0	0	0	0	0	8.92316	8.92316	8.92316	8.92316	8.92316	8.92316	8.92316	9.53126	8.92316
chr1:165874414-165931727-	0	0	0	0	0	0	0	0	0	1	0	0	1	0	0	0	0	0	0	0	4	0	0	0	0	0	0	0	0	0	0	0	0	0	0	0	0	0	0	0	8.92316	8.92316	8.92316	8.92316	8.92316	8.92316	8.92316	8.92316	8.92316
chr1:165874414-165946002-	0	0	0	0	0	0	0	0	0	0	0	0	0	0	0	0	0	0	0	0	1	3	0	0	0	0	0	0	0	0	0	0	0	0	0	0	0	0	0	0	8.92316	8.92316	8.92316	8.92316	8.92316	8.92316	8.92316	8.92316	8.92316
chr1:165875382-165931727-	2	0	0	0	0	0	0	0	0	0	0	0	0	0	0	0	0	0	0	0	1	0	0	0	0	0	0	0	0	0	0	0	0	0	0	0	0	0	0	0	9.7694	8.92316	8.92316	8.92316	8.92316	8.92316	8.92316	8.92316	8.92316
chr1:165875382-165952856-	0	2	0	0	0	0	0	0	0	0	0	0	0	0	0	0	1	0	0	0	0	0	0	1	0	0	0	0	0	0	0	0	0	1	0	0	0	0	0	0	8.92316	9.87826	8.92316	8.92316	8.92316	8.92316	8.92316	8.92316	8.92316
chr1:165891810-165897766-	0	1	0	0	0	0	0	0	0	0	0	0	0	0	4	0	0	0	0	0	0	0	0	0	0	0	0	0	0	0	0	0	0	0	0	0	0	0	0	0	8.92316	9.47834	8.92316	8.92316	8.92316	8.92316	8.92316	8.92316	8.92316
chr1:165897625-165931727-	0	0	0	0	0	0	0	0	0	0	0	0	0	0	0	0	0	0	0	0	0	0	0	0	0	0	0	0	0	0	0	0	0	0	0	0	0	0	2	0	8.92316	8.92316	8.92316	8.92316	8.92316	8.92316	8.92316	8.92316	8.92316
chr1:165913227-165931727-	0	0	0	0	0	0	0	0	0	0	0	0	0	0	0	0	0	0	0	0	0	0	0	0	0	2	0	0	0	0	0	0	0	0	0	0	0	0	0	0	8.92316	8.92316	8.92316	8.92316	8.92316	8.92316	8.92316	8.92316	8.92316
chr1:166140782-166140938+	0	0	0	0	0	2	0	0	0	0	0	0	0	0	0	0	0	0	0	0	0	0	0	0	0	0	0	0	0	0	0	0	0	0	0	0	0	0	0	0	8.92316	8.92316	8.92316	8.92316	8.92316	9.98893	8.92316	8.92316	8.92316
chr1:166146639-166152784+	0	0	0	0	0	0	0	0	0	0	0	0	0	0	0	0	0	1	3	0	0	0	0	0	0	0	0	0	0	0	0	0	0	0	0	0	0	0	0	0	8.92316	8.92316	8.92316	8.92316	8.92316	8.92316	8.92316	8.92316	8.92316
chr1:166146639-166157668+	0	0	0	0	0	0	0	0	0	0	0	0	0	0	0	0	0	0	0	0	0	0	0	0	0	3	0	0	0	0	0	0	0	0	0	0	0	0	0	0	8.92316	8.92316	8.92316	8.92316	8.92316	8.92316	8.92316	8.92316	8.92316
chr1:166146731-166165452+	0	0	2	0	0	0	0	0	0	0	0	0	0	0	0	0	0	0	0	0	0	0	0	0	0	0	0	0	0	0	0	0	0	0	0	0	0	0	0	0	8.92316	8.92316	9.89315	8.92316	8.92316	8.92316	8.92316	8.92316	8.92316
chr1:166382704-166382888+	0	0	0	0	0	0	0	0	0	0	0	0	3	0	0	0	0	0	0	0	0	0	0	0	0	0	0	0	0	0	0	0	0	0	0	0	0	0	0	0	8.92316	8.92316	8.92316	8.92316	8.92316	8.92316	8.92316	8.92316	8.92316
chr1:167227732-167237648-	0	0	0	0	0	0	0	0	0	0	0	0	0	0	0	0	0	0	0	0	0	0	0	0	0	0	0	1	0	0	0	0	0	0	0	0	0	0	3	0	8.92316	8.92316	8.92316	8.92316	8.92316	8.92316	8.92316	8.92316	8.92316
chr1:167229893-167237648-	0	0	0	0	0	0	0	0	0	0	0	1	0	0	0	0	0	0	0	0	0	0	0	0	0	0	0	0	0	0	2	0	1	0	0	0	0	1	0	0	8.92316	8.92316	8.92316	8.92316	8.92316	8.92316	8.92316	8.92316	8.92316
chr1:167234692-167237648-	0	0	4	2	2	2	0	2	0	2	1	1	1	3	0	0	1	1	6	1	1	3	0	0	2	0	2	3	1	0	3	0	2	0	1	0	1	1	4	0	8.92316	8.92316	10.468	9.88598	9.89321	9.98893	8.92316	9.95773	8.92316
chr1:167830546-167832894+	1	0	0	2	1	0	0	0	2	1	0	0	2	0	0	0	0	0	0	1	1	0	0	0	0	0	0	0	0	0	0	0	0	0	1	1	0	0	0	0	9.40746	8.92316	8.92316	9.88598	9.48822	8.92316	8.92316	8.92316	9.90366
chr1:168153972-168154789-	0	0	0	0	0	0	0	0	0	0	0	4	0	0	0	0	0	0	0	0	0	0	0	0	0	0	0	0	0	0	0	0	0	0	0	0	0	0	0	0	8.92316	8.92316	8.92316	8.92316	8.92316	8.92316	8.92316	8.92316	8.92316
chr1:168154060-168154286-	4	0	0	0	0	0	0	0	2	1	0	0	0	0	0	0	0	0	0	0	0	0	0	0	0	0	0	0	0	0	0	0	0	1	0	0	0	0	0	0	10.2992	8.92316	8.92316	8.92316	8.92316	8.92316	8.92316	8.92316	9.90366
chr1:168203347-168209595-	0	0	0	0	0	0	0	0	0	0	0	0	0	0	0	0	0	2	0	0	0	0	0	0	0	0	0	0	0	0	0	0	0	0	0	0	0	0	0	0	8.92316	8.92316	8.92316	8.92316	8.92316	8.92316	8.92316	8.92316	8.92316
chr1:169505982-169513541-	0	1	0	0	0	0	0	0	0	0	0	0	0	0	0	0	0	0	0	0	0	0	0	0	0	0	0	0	0	0	0	0	0	0	1	0	0	2	0	0	8.92316	9.47834	8.92316	8.92316	8.92316	8.92316	8.92316	8.92316	8.92316
chr1:169690416-169692370+	0	0	0	1	0	0	0	0	0	0	0	0	0	0	3	0	0	0	0	0	1	0	0	0	0	0	0	0	0	0	0	0	0	1	0	0	0	0	0	0	8.92316	8.92316	8.92316	9.48344	8.92316	8.92316	8.92316	8.92316	8.92316
chr1:170026641-170026800-	2	0	0	0	0	0	0	0	0	0	0	0	0	0	0	0	0	0	0	0	0	0	0	0	0	0	0	0	0	0	0	0	0	0	0	0	0	0	0	0	9.7694	8.92316	8.92316	8.92316	8.92316	8.92316	8.92316	8.92316	8.92316
chr1:170147996-170166948-	0	0	0	2	0	0	0	0	0	0	2	0	1	2	0	0	0	0	0	0	0	0	0	0	0	1	0	0	0	0	2	0	0	1	0	0	0	2	0	0	8.92316	8.92316	8.92316	9.88598	8.92316	8.92316	8.92316	8.92316	8.92316
chr1:170149271-170166948-	2	0	0	0	0	0	0	0	0	0	0	0	1	0	0	0	0	0	0	0	3	0	0	0	0	1	1	2	4	0	0	0	0	0	2	2	0	0	0	0	9.7694	8.92316	8.92316	8.92316	8.92316	8.92316	8.92316	8.92316	8.92316
chr1:170154824-170156630-	0	0	0	0	0	0	0	1	0	0	0	0	2	0	0	0	0	0	0	0	0	1	0	2	0	0	0	0	0	1	0	0	0	0	0	1	0	0	0	0	8.92316	8.92316	8.92316	8.92316	8.92316	8.92316	8.92316	9.53126	8.92316
chr1:170156924-170166948-	3	5	1	1	3	0	2	4	1	2	0	0	2	1	0	3	0	1	0	1	2	0	1	2	2	1	0	1	0	0	0	0	3	0	1	0	0	0	1	10	10.0585	10.6659	9.48818	9.48344	10.2091	8.92316	9.90803	10.554	9.49515
chr1:170496982-170497245-	0	0	0	0	1	0	0	0	0	0	0	0	0	0	0	0	0	0	0	0	0	0	0	0	0	3	0	0	0	0	0	0	0	0	0	0	0	0	0	0	8.92316	8.92316	8.92316	8.92316	9.48822	8.92316	8.92316	8.92316	8.92316
chr1:170497102-170497365-	0	0	0	0	0	0	0	0	0	0	0	0	0	0	0	0	0	0	0	0	0	0	0	0	0	2	0	0	0	0	0	0	0	0	0	0	0	0	0	0	8.92316	8.92316	8.92316	8.92316	8.92316	8.92316	8.92316	8.92316	8.92316
chr1:170514615-170534131-	0	0	2	0	0	0	0	0	0	0	0	0	0	0	0	0	0	0	0	0	0	0	0	0	0	0	0	0	0	0	0	0	0	0	0	0	0	0	0	0	8.92316	8.92316	9.89315	8.92316	8.92316	8.92316	8.92316	8.92316	8.92316
chr1:170729319-170736945-	0	0	2	0	0	0	0	0	0	0	0	0	0	0	0	0	0	0	0	0	0	0	0	0	0	0	0	0	0	0	0	0	0	0	0	0	0	0	0	0	8.92316	8.92316	9.89315	8.92316	8.92316	8.92316	8.92316	8.92316	8.92316
chr1:170787346-170799745-	0	0	0	1	2	0	0	0	0	0	0	0	0	1	0	0	0	1	0	0	2	1	0	0	0	0	0	0	0	0	0	0	0	0	0	0	0	0	0	0	8.92316	8.92316	8.92316	9.48344	9.89321	8.92316	8.92316	8.92316	8.92316
chr1:170787346-170819432-	0	0	0	0	0	2	1	1	0	0	1	0	0	1	0	0	0	0	0	0	1	0	0	0	0	0	0	0	0	0	0	0	0	0	0	0	1	0	0	2	8.92316	8.92316	8.92316	8.92316	8.92316	9.98893	9.49805	9.53126	8.92316
chr1:170787346-170849217-	0	0	0	0	0	0	0	0	0	0	0	0	0	0	0	0	0	0	0	0	0	0	0	0	0	0	0	0	0	0	0	0	2	0	1	0	0	0	0	0	8.92316	8.92316	8.92316	8.92316	8.92316	8.92316	8.92316	8.92316	8.92316
chr1:170787346-170855189-	0	0	0	0	0	0	0	0	0	0	0	0	0	0	0	0	0	0	0	0	0	0	0	2	0	0	0	0	0	0	0	0	0	0	0	0	0	0	0	0	8.92316	8.92316	8.92316	8.92316	8.92316	8.92316	8.92316	8.92316	8.92316
chr1:170834820-170841812-	0	0	0	0	1	0	0	0	0	0	0	0	0	0	0	0	0	0	0	0	0	0	0	0	0	0	0	0	0	0	0	0	0	0	0	0	0	0	3	0	8.92316	8.92316	8.92316	8.92316	9.48822	8.92316	8.92316	8.92316	8.92316
chr1:170849117-170855189-	0	0	0	0	2	0	0	0	0	0	0	0	0	0	0	0	0	0	0	1	0	2	0	0	0	0	0	0	0	0	0	0	0	0	0	0	0	0	0	0	8.92316	8.92316	8.92316	8.92316	9.89321	8.92316	8.92316	8.92316	8.92316
chr1:171138417-171138755-	0	0	0	0	0	0	0	0	0	0	0	1	0	2	0	0	0	0	0	0	0	0	0	0	0	0	0	0	0	0	0	0	0	0	0	0	0	0	0	0	8.92316	8.92316	8.92316	8.92316	8.92316	8.92316	8.92316	8.92316	8.92316
chr1:171338252-171338930+	0	0	0	0	0	0	0	0	0	0	0	0	2	0	1	0	0	0	0	0	0	0	0	0	0	0	0	0	0	0	0	0	0	0	0	0	0	0	0	0	8.92316	8.92316	8.92316	8.92316	8.92316	8.92316	8.92316	8.92316	8.92316
chr1:171463096-171463266+	0	0	0	0	0	0	0	0	0	0	0	0	0	0	0	0	0	0	0	0	0	0	0	0	0	0	0	0	0	0	0	0	0	0	0	0	2	0	0	1	8.92316	8.92316	8.92316	8.92316	8.92316	8.92316	8.92316	8.92316	8.92316
chr1:171872697-171873439+	0	0	0	0	0	0	2	0	1	0	0	0	0	0	0	0	0	0	1	0	0	0	1	0	0	1	0	0	0	0	0	0	0	0	0	6	0	0	0	0	8.92316	8.92316	8.92316	8.92316	8.92316	8.92316	9.90803	8.92316	9.49515
chr1:172144388-172144736-	0	0	0	0	0	0	0	0	0	0	0	0	0	0	0	0	0	0	0	0	0	0	0	0	0	0	0	0	0	0	0	0	0	0	2	0	0	0	0	0	8.92316	8.92316	8.92316	8.92316	8.92316	8.92316	8.92316	8.92316	8.92316
chr1:172149249-172174083+	0	0	0	0	0	0	0	0	0	0	0	0	0	0	2	0	0	0	0	0	0	0	0	0	0	0	0	0	0	0	0	0	0	0	0	0	0	0	0	0	8.92316	8.92316	8.92316	8.92316	8.92316	8.92316	8.92316	8.92316	8.92316
chr1:172149249-172175577+	0	0	0	0	0	0	0	0	0	0	0	0	0	0	0	0	0	0	0	0	0	0	0	0	2	0	0	0	0	0	0	0	0	0	0	0	0	0	0	0	8.92316	8.92316	8.92316	8.92316	8.92316	8.92316	8.92316	8.92316	8.92316
chr1:172149249-172186368+	0	0	0	0	0	0	0	0	0	0	0	0	0	0	0	0	0	2	0	0	0	0	0	0	0	0	0	0	0	0	0	0	0	0	0	0	0	0	0	0	8.92316	8.92316	8.92316	8.92316	8.92316	8.92316	8.92316	8.92316	8.92316
chr1:172165848-172180017+	0	0	0	0	0	0	0	0	0	0	0	0	0	0	0	0	0	0	0	0	0	1	0	0	0	0	0	1	0	0	0	1	2	0	0	0	0	0	0	0	8.92316	8.92316	8.92316	8.92316	8.92316	8.92316	8.92316	8.92316	8.92316
chr1:172173943-172187460+	5	2	4	1	2	0	3	4	4	0	1	3	2	2	0	3	2	5	6	2	3	7	4	4	4	5	4	4	6	4	5	3	2	2	2	0	7	4	6	1	10.5055	9.87826	10.468	9.48344	9.89321	8.92316	10.2269	10.554	10.4821
chr1:172173943-172187460-	0	0	0	0	0	0	0	0	0	0	0	0	0	0	0	0	0	4	0	0	0	0	0	0	0	0	0	0	0	0	0	0	0	0	0	0	0	0	0	0	8.92316	8.92316	8.92316	8.92316	8.92316	8.92316	8.92316	8.92316	8.92316
chr1:172484281-172484970+	2	0	0	1	0	0	2	0	0	0	0	0	0	0	0	0	0	0	0	2	1	0	0	2	0	0	2	0	0	0	0	0	0	0	2	0	0	0	0	0	9.7694	8.92316	8.92316	9.48344	8.92316	8.92316	9.90803	8.92316	8.92316
chr1:172495604-172497726+	0	0	0	0	0	0	0	0	0	0	0	2	0	0	0	0	0	0	0	0	0	0	0	0	0	0	0	0	0	0	0	0	0	0	0	0	0	0	0	0	8.92316	8.92316	8.92316	8.92316	8.92316	8.92316	8.92316	8.92316	8.92316
chr1:173436658-173436953+	0	0	0	2	0	0	0	0	0	0	0	0	0	0	0	0	0	0	0	0	0	0	0	0	0	0	0	0	0	0	0	0	0	0	0	0	0	0	0	0	8.92316	8.92316	8.92316	9.88598	8.92316	8.92316	8.92316	8.92316	8.92316
chr1:173729059-173729310-	0	0	0	0	0	0	0	0	0	0	0	0	0	2	0	0	0	0	0	0	0	0	0	0	0	0	0	0	0	0	0	0	0	0	0	0	0	0	0	0	8.92316	8.92316	8.92316	8.92316	8.92316	8.92316	8.92316	8.92316	8.92316
chr1:175892874-175901453+	0	0	0	0	0	0	0	0	0	0	0	0	0	0	0	0	0	0	0	0	0	0	0	0	0	0	0	0	0	0	4	0	0	0	0	0	0	0	0	0	8.92316	8.92316	8.92316	8.92316	8.92316	8.92316	8.92316	8.92316	8.92316
chr1:176044835-176090039-	1	0	0	0	0	0	0	0	0	0	0	0	0	0	0	0	0	0	0	0	0	0	0	0	0	0	0	0	0	0	0	0	0	2	0	0	0	0	0	0	9.40746	8.92316	8.92316	8.92316	8.92316	8.92316	8.92316	8.92316	8.92316
chr1:176824752-176831182+	0	0	0	0	0	0	0	0	0	0	0	0	0	0	0	0	0	0	0	0	2	0	0	0	0	0	0	0	0	0	0	0	0	0	0	0	0	0	0	0	8.92316	8.92316	8.92316	8.92316	8.92316	8.92316	8.92316	8.92316	8.92316
chr1:177024626-177024982-	0	0	0	0	0	0	2	0	0	0	0	0	0	0	0	0	0	0	0	0	0	0	0	0	0	0	0	0	0	0	0	0	0	0	0	0	0	0	0	0	8.92316	8.92316	8.92316	8.92316	8.92316	8.92316	9.90803	8.92316	8.92316
chr1:177031650-177067333-	0	0	0	0	0	0	0	0	0	0	0	0	0	0	0	0	0	0	0	0	0	0	0	0	0	0	0	0	0	0	0	0	0	0	0	0	0	0	2	0	8.92316	8.92316	8.92316	8.92316	8.92316	8.92316	8.92316	8.92316	8.92316
chr1:177043775-177067333-	1	1	0	1	0	0	0	0	0	0	0	0	0	0	0	1	0	0	0	0	0	0	1	0	3	0	0	0	0	0	0	0	0	0	0	0	0	0	0	0	9.40746	9.47834	8.92316	9.48344	8.92316	8.92316	8.92316	8.92316	8.92316
chr1:177067211-177109738-	0	1	0	0	0	0	0	0	0	0	0	0	0	0	0	0	0	0	0	0	0	0	0	0	0	0	0	0	0	2	0	0	0	0	0	0	0	0	0	0	8.92316	9.47834	8.92316	8.92316	8.92316	8.92316	8.92316	8.92316	8.92316
chr1:177078774-177109738-	0	0	0	0	0	0	0	0	0	0	0	0	0	0	0	0	0	1	0	0	0	0	2	0	0	0	0	0	0	0	0	0	0	0	0	0	0	0	0	0	8.92316	8.92316	8.92316	8.92316	8.92316	8.92316	8.92316	8.92316	8.92316
chr1:177096967-177109738-	0	1	0	0	0	0	0	0	0	0	0	0	1	0	0	0	0	0	1	1	0	0	1	0	0	0	0	0	2	1	0	2	1	1	0	1	0	0	0	2	8.92316	9.47834	8.92316	8.92316	8.92316	8.92316	8.92316	8.92316	8.92316
chr1:177096967-177131096-	0	2	1	1	0	0	0	0	0	0	0	0	0	0	0	0	0	0	1	0	0	0	0	0	1	0	0	0	0	0	2	1	2	0	0	0	0	0	0	0	8.92316	9.87826	9.48818	9.48344	8.92316	8.92316	8.92316	8.92316	8.92316
chr1:177102962-177131096-	0	0	0	0	0	1	0	0	0	0	1	0	0	2	0	0	0	0	0	0	0	0	0	0	0	0	0	0	0	0	0	0	0	0	0	0	0	0	0	0	8.92316	8.92316	8.92316	8.92316	8.92316	9.5523	8.92316	8.92316	8.92316
chr1:177209976-177248881-	0	0	0	0	0	1	1	0	0	1	0	0	2	0	0	0	0	1	0	0	0	0	0	0	0	0	0	0	0	0	1	1	0	0	0	0	0	0	0	0	8.92316	8.92316	8.92316	8.92316	8.92316	9.5523	9.49805	8.92316	8.92316
chr1:178323134-178325313-	1	3	1	1	3	0	1	2	2	2	0	0	2	3	4	1	1	4	0	1	0	4	2	7	2	0	2	3	1	0	0	0	0	2	1	1	6	0	3	3	9.40746	10.191	9.48818	9.48344	10.2091	8.92316	9.49805	9.95773	9.90366
chr1:178323134-178329939-	0	0	0	0	0	0	0	1	0	0	0	0	0	0	0	2	1	0	0	0	0	0	0	0	0	0	0	0	0	0	0	0	0	0	0	0	0	0	0	0	8.92316	8.92316	8.92316	8.92316	8.92316	8.92316	8.92316	9.53126	8.92316
chr1:178323134-178334026-	0	0	0	0	0	0	0	0	3	0	0	0	0	0	0	1	0	0	0	0	0	0	0	0	0	0	0	1	0	0	0	0	0	0	0	0	0	0	0	0	8.92316	8.92316	8.92316	8.92316	8.92316	8.92316	8.92316	8.92316	10.2217
chr1:178678826-178679359+	0	0	2	3	0	0	0	0	0	1	0	0	0	0	0	1	2	2	0	1	2	1	1	0	0	0	0	5	0	0	0	0	0	1	1	0	2	1	0	1	8.92316	8.92316	9.89315	10.2004	8.92316	8.92316	8.92316	8.92316	8.92316
chr1:178678826-178715969+	3	0	0	0	0	0	0	0	0	0	0	0	0	0	0	0	0	0	0	0	0	0	0	0	0	0	1	0	0	1	0	0	0	0	1	0	0	0	0	0	10.0585	8.92316	8.92316	8.92316	8.92316	8.92316	8.92316	8.92316	8.92316
chr1:179043737-179050378-	1	0	0	0	0	0	0	0	0	0	0	1	0	0	0	0	2	0	1	0	0	0	0	0	0	1	0	0	0	0	0	0	0	0	0	3	0	0	0	0	9.40746	8.92316	8.92316	8.92316	8.92316	8.92316	8.92316	8.92316	8.92316
chr1:179137058-179137212-	0	0	0	0	0	0	0	0	0	0	0	4	0	0	0	0	0	0	0	0	0	0	0	0	0	0	0	0	0	0	0	0	0	0	0	0	0	0	0	0	8.92316	8.92316	8.92316	8.92316	8.92316	8.92316	8.92316	8.92316	8.92316
chr1:179378626-179378792-	0	0	0	0	0	0	0	0	0	0	0	0	0	0	0	0	2	0	0	0	0	0	0	0	0	0	0	0	0	0	0	0	0	0	0	0	0	0	0	0	8.92316	8.92316	8.92316	8.92316	8.92316	8.92316	8.92316	8.92316	8.92316
chr1:179533633-179544986-	2	0	0	0	0	0	0	0	0	0	0	0	0	0	0	0	0	0	0	1	0	0	0	0	0	0	0	0	0	0	0	0	0	0	0	0	0	0	0	0	9.7694	8.92316	8.92316	8.92316	8.92316	8.92316	8.92316	8.92316	8.92316
chr1:179593870-179594118+	0	0	0	0	0	0	0	0	0	0	0	0	0	0	2	0	0	0	0	0	0	0	0	0	0	0	0	0	0	0	0	0	0	0	0	0	0	0	0	0	8.92316	8.92316	8.92316	8.92316	8.92316	8.92316	8.92316	8.92316	8.92316
chr1:179601702-179610666+	0	0	0	0	0	0	0	0	0	0	0	0	0	0	0	0	0	0	0	0	0	0	0	0	1	0	0	0	0	0	0	0	0	0	0	3	0	0	0	0	8.92316	8.92316	8.92316	8.92316	8.92316	8.92316	8.92316	8.92316	8.92316
chr1:179752311-179754072-	0	0	0	0	0	0	0	0	0	0	0	0	0	0	0	0	2	0	0	0	0	0	0	0	0	0	0	0	0	0	0	0	0	0	0	0	0	0	0	0	8.92316	8.92316	8.92316	8.92316	8.92316	8.92316	8.92316	8.92316	8.92316
chr1:179779604-179780960-	0	0	0	0	0	0	0	0	0	0	0	0	2	0	0	0	0	0	0	0	0	0	0	0	0	0	0	0	0	0	0	0	0	0	0	0	0	0	0	0	8.92316	8.92316	8.92316	8.92316	8.92316	8.92316	8.92316	8.92316	8.92316
chr1:179780856-179786131-	0	0	0	0	0	0	0	0	0	0	0	0	0	0	0	0	0	2	0	0	0	0	0	0	0	0	0	0	0	0	0	0	0	0	0	0	0	0	0	0	8.92316	8.92316	8.92316	8.92316	8.92316	8.92316	8.92316	8.92316	8.92316
chr1:179784090-179786131-	0	4	0	0	0	0	0	0	0	0	0	0	0	0	0	1	1	0	0	1	0	0	0	0	3	0	0	0	0	1	0	0	0	0	1	0	1	0	0	0	8.92316	10.4479	8.92316	8.92316	8.92316	8.92316	8.92316	8.92316	8.92316
chr1:179786695-179795930-	0	0	0	0	0	0	0	0	0	0	0	0	0	0	0	0	0	0	0	0	0	0	0	0	0	0	0	0	2	0	0	0	0	0	0	0	0	0	0	0	8.92316	8.92316	8.92316	8.92316	8.92316	8.92316	8.92316	8.92316	8.92316
chr1:179795677-179799338-	0	3	0	0	0	0	0	0	0	0	0	0	0	0	0	0	0	0	0	0	0	0	0	0	0	0	0	0	0	0	0	0	0	0	0	0	0	0	0	0	8.92316	10.191	8.92316	8.92316	8.92316	8.92316	8.92316	8.92316	8.92316
chr1:179970882-180040200+	0	0	0	0	0	0	0	0	0	0	0	0	0	0	0	0	0	0	0	0	0	0	0	0	0	0	0	0	0	0	2	0	0	0	0	0	0	0	0	0	8.92316	8.92316	8.92316	8.92316	8.92316	8.92316	8.92316	8.92316	8.92316
chr1:179999362-180040200+	0	2	1	0	3	0	1	0	1	0	2	0	0	2	0	0	0	0	1	0	1	1	1	1	0	0	0	0	3	1	0	0	0	1	0	0	4	0	0	0	8.92316	9.87826	9.48818	8.92316	10.2091	8.92316	9.49805	8.92316	9.49515
chr1:179999362-180074692+	0	0	0	0	0	0	0	0	0	0	0	0	0	0	0	0	1	0	0	0	0	1	0	0	0	0	0	2	1	0	0	0	0	0	0	0	0	0	0	0	8.92316	8.92316	8.92316	8.92316	8.92316	8.92316	8.92316	8.92316	8.92316
chr1:180031505-180040200+	0	0	0	0	0	0	0	0	2	0	0	0	0	0	0	0	0	0	0	0	0	0	0	0	0	1	0	0	0	0	2	0	2	0	0	0	0	0	0	0	8.92316	8.92316	8.92316	8.92316	8.92316	8.92316	8.92316	8.92316	9.90366
chr1:180093944-180117743+	0	0	0	0	1	0	0	0	0	3	0	1	0	1	0	0	0	0	0	0	0	0	0	0	0	0	0	0	0	0	0	0	2	0	0	0	0	0	0	0	8.92316	8.92316	8.92316	8.92316	9.48822	8.92316	8.92316	8.92316	8.92316
chr1:180101025-180117743+	1	0	0	0	0	0	0	1	0	0	1	0	0	0	0	0	1	0	0	0	0	2	0	1	0	1	0	0	0	0	1	0	0	3	0	0	0	0	0	1	9.40746	8.92316	8.92316	8.92316	8.92316	8.92316	8.92316	9.53126	8.92316
chr1:180151160-180153064+	0	0	0	0	0	0	0	0	0	0	0	0	0	0	0	0	0	0	0	0	2	0	0	0	0	0	0	0	0	0	0	0	0	0	0	0	0	0	0	0	8.92316	8.92316	8.92316	8.92316	8.92316	8.92316	8.92316	8.92316	8.92316
chr1:180587926-180588682+	0	0	0	0	0	0	0	0	0	0	0	0	0	0	0	0	0	0	0	0	0	0	0	0	0	0	0	0	0	0	0	0	0	0	0	0	0	0	0	2	8.92316	8.92316	8.92316	8.92316	8.92316	8.92316	8.92316	8.92316	8.92316
chr1:180589398-180589593+	0	0	0	0	0	0	0	0	0	0	0	0	0	0	0	0	0	0	0	0	0	0	0	0	0	0	0	0	0	0	0	0	0	0	0	2	0	0	0	0	8.92316	8.92316	8.92316	8.92316	8.92316	8.92316	8.92316	8.92316	8.92316
chr1:180733166-180738637+	6	4	2	5	7	6	5	9	5	7	3	2	5	9	3	5	3	8	4	3	8	4	9	11	9	3	3	7	3	6	3	9	6	21	5	6	7	7	1	7	10.6859	10.4479	9.89315	10.6771	11.0462	11.0207	10.7088	11.4387	10.7026
chr1:180733166-180747078+	1	3	0	0	1	0	0	1	0	0	2	2	0	1	0	0	0	0	0	0	0	2	0	0	1	1	0	0	0	2	1	0	0	1	0	1	0	0	0	0	9.40746	10.191	8.92316	8.92316	9.48822	8.92316	8.92316	9.53126	8.92316
chr1:180737413-180737629+	0	0	0	0	2	0	0	0	0	0	0	0	0	0	0	0	0	0	0	0	0	0	0	0	0	0	0	0	0	0	0	0	0	0	0	0	0	0	0	0	8.92316	8.92316	8.92316	8.92316	9.89321	8.92316	8.92316	8.92316	8.92316
chr1:180952132-180954950+	0	0	0	0	0	0	0	0	0	0	2	0	0	0	0	0	0	0	0	0	0	0	0	0	0	0	0	0	0	0	0	0	0	0	0	0	0	0	0	0	8.92316	8.92316	8.92316	8.92316	8.92316	8.92316	8.92316	8.92316	8.92316
chr1:180952132-180958047+	0	0	0	0	0	1	0	0	0	0	0	0	0	0	0	0	0	0	3	0	0	0	0	0	0	0	0	0	0	0	0	0	0	0	0	0	0	0	0	0	8.92316	8.92316	8.92316	8.92316	8.92316	9.5523	8.92316	8.92316	8.92316
chr1:180955177-180955928+	0	0	0	0	0	0	0	0	0	0	0	0	0	0	0	0	0	0	0	0	0	0	2	0	1	0	0	0	0	0	0	0	0	0	0	0	0	0	0	0	8.92316	8.92316	8.92316	8.92316	8.92316	8.92316	8.92316	8.92316	8.92316
chr1:180960766-180972756+	0	0	0	0	0	0	0	0	0	0	0	3	0	0	0	0	0	0	0	0	0	0	0	0	0	0	0	0	0	0	0	0	0	0	0	0	0	0	0	0	8.92316	8.92316	8.92316	8.92316	8.92316	8.92316	8.92316	8.92316	8.92316
chr1:181109160-181123984-	0	0	0	0	0	0	0	0	0	0	0	0	0	0	0	0	0	0	2	1	1	0	0	0	0	1	0	0	0	0	0	1	1	1	0	0	0	0	0	0	8.92316	8.92316	8.92316	8.92316	8.92316	8.92316	8.92316	8.92316	8.92316
chr1:181134792-181136930-	0	0	1	2	0	1	0	0	1	0	0	0	0	0	0	0	0	0	0	1	2	0	0	0	0	1	0	0	0	0	0	0	1	0	2	0	0	0	0	0	8.92316	8.92316	9.48818	9.88598	8.92316	9.5523	8.92316	8.92316	9.49515
chr1:181134792-181142399-	0	1	0	0	0	0	0	0	0	0	0	0	0	0	0	2	0	0	0	0	0	0	0	0	0	0	0	0	0	0	0	0	0	0	0	0	0	0	0	0	8.92316	9.47834	8.92316	8.92316	8.92316	8.92316	8.92316	8.92316	8.92316
chr1:181181304-181191899-	2	0	0	0	0	0	0	0	0	0	0	0	0	0	0	0	0	0	0	0	0	0	0	0	0	0	0	0	0	0	0	0	0	0	0	0	0	0	0	0	9.7694	8.92316	8.92316	8.92316	8.92316	8.92316	8.92316	8.92316	8.92316
chr1:181184251-181203160-	0	0	0	0	0	0	0	0	0	0	0	0	0	0	0	0	0	0	0	0	0	2	0	0	0	0	0	0	0	0	0	0	0	0	0	0	0	0	0	0	8.92316	8.92316	8.92316	8.92316	8.92316	8.92316	8.92316	8.92316	8.92316
chr1:181185948-181203160-	0	0	0	0	0	0	0	0	0	0	0	0	0	0	0	0	2	0	0	0	0	0	0	0	0	0	0	0	0	0	0	0	0	0	0	0	0	0	0	0	8.92316	8.92316	8.92316	8.92316	8.92316	8.92316	8.92316	8.92316	8.92316
chr1:181187606-181191861-	0	0	0	0	0	0	0	0	0	0	0	0	0	0	0	0	0	0	1	2	0	0	0	0	0	0	0	0	0	0	0	0	0	0	0	0	0	0	0	0	8.92316	8.92316	8.92316	8.92316	8.92316	8.92316	8.92316	8.92316	8.92316
chr1:181200637-181200881-	0	0	0	0	0	0	2	0	0	0	0	0	0	0	0	0	0	0	0	0	0	0	0	0	0	0	0	0	0	0	0	0	0	0	0	0	0	0	0	0	8.92316	8.92316	8.92316	8.92316	8.92316	8.92316	9.90803	8.92316	8.92316
chr1:181825622-181832232-	0	1	4	1	2	2	0	0	0	0	0	2	2	2	1	2	3	2	0	2	0	1	1	1	1	2	1	2	5	0	3	3	4	3	0	0	3	2	0	0	8.92316	9.47834	10.468	9.48344	9.89321	9.98893	8.92316	8.92316	8.92316
chr1:181905469-181961919-	4	5	0	0	0	0	0	0	2	0	0	0	0	0	0	0	2	0	0	0	0	1	0	0	0	0	0	0	0	0	0	0	0	0	0	0	0	1	0	0	10.2992	10.6659	8.92316	8.92316	8.92316	8.92316	8.92316	8.92316	9.90366
chr1:181913307-181961919-	0	0	0	0	0	0	0	0	0	0	0	0	0	0	0	0	0	0	0	0	0	0	0	0	0	2	0	0	0	0	0	0	0	0	0	0	0	0	0	0	8.92316	8.92316	8.92316	8.92316	8.92316	8.92316	8.92316	8.92316	8.92316
chr1:181956394-181961919-	2	1	1	0	3	0	0	1	5	5	1	2	11	0	6	1	2	0	0	0	1	2	0	0	1	1	1	1	2	4	0	1	0	0	0	3	1	0	3	1	9.7694	9.47834	9.48818	8.92316	10.2091	8.92316	8.92316	9.53126	10.7026
chr1:182446742-182446930+	0	0	0	0	0	0	0	0	0	0	0	0	0	0	0	0	0	0	0	0	0	0	0	0	0	0	0	0	0	0	0	0	0	0	0	0	0	0	2	0	8.92316	8.92316	8.92316	8.92316	8.92316	8.92316	8.92316	8.92316	8.92316
chr1:182467995-182468193-	0	0	0	0	0	0	0	0	0	0	0	0	4	0	0	1	0	0	0	0	0	0	0	0	0	0	0	0	0	1	0	0	0	0	0	0	0	0	0	0	8.92316	8.92316	8.92316	8.92316	8.92316	8.92316	8.92316	8.92316	8.92316
chr1:182473882-182481651-	3	0	0	0	0	0	0	0	0	0	0	0	0	0	0	0	0	0	0	0	0	0	0	0	0	0	1	0	0	3	0	0	0	0	0	0	0	0	0	0	10.0585	8.92316	8.92316	8.92316	8.92316	8.92316	8.92316	8.92316	8.92316
chr1:182616270-182623983+	0	0	0	0	0	0	0	0	0	0	0	0	0	0	0	0	0	0	1	0	0	0	0	0	0	0	0	0	0	0	5	0	3	0	1	0	0	0	0	0	8.92316	8.92316	8.92316	8.92316	8.92316	8.92316	8.92316	8.92316	8.92316
chr1:182620056-182623983+	0	0	0	0	0	0	0	0	0	0	0	0	0	0	0	0	0	0	0	0	2	0	0	1	0	0	0	0	0	0	0	0	0	0	0	0	0	0	0	0	8.92316	8.92316	8.92316	8.92316	8.92316	8.92316	8.92316	8.92316	8.92316
chr1:183135355-183135876-	1	0	1	0	1	1	0	1	0	1	1	1	1	1	0	2	2	1	0	1	0	0	1	1	7	1	0	2	1	2	0	3	0	3	0	2	1	0	1	0	9.40746	8.92316	9.48818	8.92316	9.48822	9.5523	8.92316	9.53126	8.92316
chr1:183135355-183135908-	0	0	0	0	0	0	0	0	0	0	0	0	3	0	0	0	0	0	0	0	0	0	0	0	0	0	0	0	0	0	0	0	0	0	0	0	0	0	0	0	8.92316	8.92316	8.92316	8.92316	8.92316	8.92316	8.92316	8.92316	8.92316
chr1:183304678-183318934+	0	0	0	0	0	0	0	0	0	0	0	0	0	0	0	0	0	0	1	0	0	0	0	0	0	0	0	2	1	0	0	0	0	0	0	0	0	0	0	0	8.92316	8.92316	8.92316	8.92316	8.92316	8.92316	8.92316	8.92316	8.92316
chr1:183350964-183365780-	0	0	0	0	0	0	0	0	0	0	0	1	0	2	0	0	0	0	0	0	0	0	0	0	0	0	0	0	0	0	0	0	0	0	0	0	0	0	0	0	8.92316	8.92316	8.92316	8.92316	8.92316	8.92316	8.92316	8.92316	8.92316
chr1:183358223-183358406-	0	0	0	0	0	0	0	0	0	0	0	0	0	0	0	0	0	2	0	0	0	0	0	0	0	0	0	0	0	0	0	0	0	0	0	0	0	0	0	0	8.92316	8.92316	8.92316	8.92316	8.92316	8.92316	8.92316	8.92316	8.92316
chr1:183358223-183358409-	0	0	0	0	0	0	0	0	0	0	0	0	0	0	0	0	0	0	0	0	0	0	0	0	0	1	0	0	0	0	0	0	0	0	0	0	2	0	0	0	8.92316	8.92316	8.92316	8.92316	8.92316	8.92316	8.92316	8.92316	8.92316
chr1:184824207-184824413-	0	0	0	0	0	0	0	0	0	0	0	0	0	0	0	0	0	0	0	0	0	0	1	0	2	0	0	0	0	0	0	0	0	0	0	0	0	0	0	0	8.92316	8.92316	8.92316	8.92316	8.92316	8.92316	8.92316	8.92316	8.92316
chr1:184872211-184872406-	0	0	0	0	0	0	0	0	0	0	0	0	0	0	0	0	0	0	0	0	0	0	0	0	0	0	0	0	0	0	0	0	0	0	0	2	0	0	0	0	8.92316	8.92316	8.92316	8.92316	8.92316	8.92316	8.92316	8.92316	8.92316
chr1:184925816-184945000-	0	0	0	0	0	0	0	0	0	0	0	0	0	0	0	0	2	0	0	0	0	0	0	0	0	0	0	0	0	0	0	0	0	0	0	0	0	0	0	0	8.92316	8.92316	8.92316	8.92316	8.92316	8.92316	8.92316	8.92316	8.92316
chr1:185255745-185260498+	0	0	0	0	1	0	0	0	0	0	0	0	0	0	0	0	0	0	0	0	0	0	0	0	0	0	0	0	0	0	0	0	0	0	0	0	2	0	0	0	8.92316	8.92316	8.92316	8.92316	9.48822	8.92316	8.92316	8.92316	8.92316
chr1:185266901-185267279+	0	0	2	4	0	2	0	0	1	0	0	0	0	0	0	0	0	0	0	2	0	1	0	0	0	0	0	2	0	1	0	0	2	0	2	1	0	1	0	0	8.92316	8.92316	9.89315	10.4583	8.92316	9.98893	8.92316	8.92316	9.49515
chr1:185266901-185272642+	0	0	0	0	0	0	0	2	0	0	0	0	0	0	0	0	0	1	0	0	0	0	0	0	0	0	0	0	1	0	0	0	0	0	0	0	0	0	0	0	8.92316	8.92316	8.92316	8.92316	8.92316	8.92316	8.92316	9.95773	8.92316
chr1:185372935-185378826+	0	0	0	0	0	0	0	0	0	0	0	0	0	0	0	0	0	0	0	0	0	0	0	0	0	0	0	0	0	0	0	0	2	0	0	0	0	0	0	0	8.92316	8.92316	8.92316	8.92316	8.92316	8.92316	8.92316	8.92316	8.92316
chr1:185375517-185376146+	0	0	0	0	0	0	0	0	0	0	0	0	0	0	0	0	0	0	0	0	0	0	0	0	0	0	0	0	0	0	0	0	0	0	0	3	0	0	0	0	8.92316	8.92316	8.92316	8.92316	8.92316	8.92316	8.92316	8.92316	8.92316
chr1:185386246-185397262+	0	0	0	0	0	0	0	0	0	0	0	0	0	0	0	2	0	0	0	0	0	0	0	0	0	0	0	0	0	0	0	0	0	0	0	0	0	0	0	0	8.92316	8.92316	8.92316	8.92316	8.92316	8.92316	8.92316	8.92316	8.92316
chr1:185386246-185397267+	4	2	1	3	2	1	0	3	3	1	2	0	2	0	0	0	1	0	0	1	1	4	2	0	2	4	2	3	0	2	4	0	3	3	4	3	0	0	0	1	10.2992	9.87826	9.48818	10.2004	9.89321	9.5523	8.92316	10.2865	10.2217
chr1:185398394-185401668+	0	2	0	0	0	0	0	0	0	0	0	0	0	0	0	0	0	0	0	0	0	0	0	0	1	0	0	0	0	0	0	0	0	0	0	0	0	0	0	0	8.92316	9.87826	8.92316	8.92316	8.92316	8.92316	8.92316	8.92316	8.92316
chr1:186630610-186649898-	0	0	0	0	0	0	0	0	0	0	0	0	0	0	0	0	0	0	0	0	0	2	0	0	0	0	0	0	0	0	0	0	0	0	0	0	0	0	0	0	8.92316	8.92316	8.92316	8.92316	8.92316	8.92316	8.92316	8.92316	8.92316
chr1:186736116-186739863-	1	0	0	0	1	0	1	0	0	0	0	0	1	0	0	0	0	0	0	0	0	2	1	0	0	0	1	2	0	0	0	0	0	0	0	0	0	0	0	0	9.40746	8.92316	8.92316	8.92316	9.48822	8.92316	9.49805	8.92316	8.92316
chr1:187225503-187233826+	2	4	0	0	0	0	0	0	1	0	0	0	0	0	1	0	0	0	0	0	2	2	0	0	0	0	0	1	0	0	0	0	0	0	0	0	2	0	0	1	9.7694	10.4479	8.92316	8.92316	8.92316	8.92316	8.92316	8.92316	9.49515
chr1:187281491-187282361+	0	0	0	0	0	0	0	0	0	0	0	0	0	0	0	0	0	0	0	0	0	0	0	0	0	0	0	0	0	0	0	0	0	0	0	0	0	2	0	0	8.92316	8.92316	8.92316	8.92316	8.92316	8.92316	8.92316	8.92316	8.92316
chr1:187341583-187342889+	0	0	0	0	0	0	0	0	0	0	0	0	0	0	3	0	0	0	0	0	0	0	0	0	0	0	0	0	0	0	0	0	0	0	0	0	0	0	0	0	8.92316	8.92316	8.92316	8.92316	8.92316	8.92316	8.92316	8.92316	8.92316
chr1:188043334-188043749+	0	0	0	0	0	0	2	0	0	0	0	0	0	0	0	0	0	0	0	0	0	0	0	0	0	0	0	0	0	0	0	0	0	0	0	0	0	0	0	0	8.92316	8.92316	8.92316	8.92316	8.92316	8.92316	9.90803	8.92316	8.92316
chr1:188146313-188150340+	0	0	0	0	0	0	0	0	0	0	0	3	0	1	0	0	0	0	0	1	0	0	0	0	0	0	0	0	0	0	0	0	0	0	0	0	0	0	0	0	8.92316	8.92316	8.92316	8.92316	8.92316	8.92316	8.92316	8.92316	8.92316
chr1:188983010-188997335-	0	0	0	0	0	0	0	0	0	0	0	0	0	0	0	0	0	0	0	0	2	0	0	0	0	0	0	0	0	0	0	0	0	0	0	0	0	0	0	0	8.92316	8.92316	8.92316	8.92316	8.92316	8.92316	8.92316	8.92316	8.92316
chr1:188988791-188988954-	0	0	0	0	0	0	0	0	0	0	0	0	0	0	0	0	0	0	0	0	0	2	0	0	0	0	0	0	0	0	0	0	0	0	0	0	0	0	0	0	8.92316	8.92316	8.92316	8.92316	8.92316	8.92316	8.92316	8.92316	8.92316
chr1:189256568-189258898-	0	0	0	0	0	0	3	0	0	0	0	0	0	0	0	0	0	0	0	0	0	0	0	0	1	0	0	0	0	0	0	0	0	0	0	0	0	0	0	0	8.92316	8.92316	8.92316	8.92316	8.92316	8.92316	10.2269	8.92316	8.92316
chr1:189671048-189682951-	0	3	0	0	0	0	0	0	0	0	0	0	1	0	0	0	0	0	0	0	0	0	0	1	0	0	0	0	0	1	2	0	0	0	0	0	0	0	0	0	8.92316	10.191	8.92316	8.92316	8.92316	8.92316	8.92316	8.92316	8.92316
chr1:189786636-189798681+	0	5	0	1	2	1	1	1	2	1	4	4	6	3	0	1	1	0	1	1	1	4	0	2	0	0	0	3	3	2	1	2	0	0	0	2	2	0	2	2	8.92316	10.6659	8.92316	9.48344	9.89321	9.5523	9.49805	9.53126	9.90366
chr1:189888815-189897483-	0	0	0	0	0	0	0	0	0	0	1	1	0	2	0	0	0	0	0	0	0	0	0	0	0	0	0	0	0	0	0	0	0	0	0	0	0	0	0	0	8.92316	8.92316	8.92316	8.92316	8.92316	8.92316	8.92316	8.92316	8.92316
chr1:190146952-190162313-	0	3	0	0	0	0	0	0	2	0	0	0	0	0	0	9	6	26	5	4	0	0	0	0	0	6	9	1	0	8	0	1	1	0	8	0	8	7	0	2	8.92316	10.191	8.92316	8.92316	8.92316	8.92316	8.92316	8.92316	9.90366
chr1:190153416-190162313-	0	0	0	0	0	0	0	0	0	0	0	2	2	0	0	1	3	3	1	0	0	0	0	0	0	1	1	0	0	4	0	0	0	0	1	1	4	2	0	1	8.92316	8.92316	8.92316	8.92316	8.92316	8.92316	8.92316	8.92316	8.92316
chr1:190782535-190844602-	0	0	0	0	0	0	0	0	0	0	0	0	0	0	0	0	0	0	2	0	0	0	0	0	0	0	0	0	0	0	0	0	0	0	0	0	0	0	0	0	8.92316	8.92316	8.92316	8.92316	8.92316	8.92316	8.92316	8.92316	8.92316
chr1:190798652-190810121-	0	0	0	2	0	0	0	0	0	0	0	0	0	0	2	0	0	0	0	0	0	0	0	0	0	0	0	0	0	0	0	0	0	0	0	0	0	1	0	0	8.92316	8.92316	8.92316	9.88598	8.92316	8.92316	8.92316	8.92316	8.92316
chr1:190808883-190844602-	0	0	2	0	0	0	0	0	0	0	0	0	0	0	0	0	0	0	0	0	0	0	0	0	0	0	0	0	0	0	0	0	0	0	0	0	0	0	0	0	8.92316	8.92316	9.89315	8.92316	8.92316	8.92316	8.92316	8.92316	8.92316
chr1:190834006-190844602-	1	0	0	0	0	1	0	1	0	0	0	0	1	1	0	0	0	0	0	0	0	0	0	2	0	2	0	0	0	0	0	0	0	0	0	2	0	0	0	0	9.40746	8.92316	8.92316	8.92316	8.92316	9.5523	8.92316	9.53126	8.92316
chr1:190871592-190871951-	0	0	0	0	0	0	0	0	0	0	0	0	0	0	0	0	0	0	0	0	0	0	0	0	0	0	0	2	4	0	2	1	0	0	0	0	0	0	0	0	8.92316	8.92316	8.92316	8.92316	8.92316	8.92316	8.92316	8.92316	8.92316
chr1:190871592-190899571-	3	3	3	4	5	1	1	1	3	5	0	2	0	0	0	2	0	0	0	0	1	1	2	1	0	3	0	2	0	3	0	0	2	2	0	1	1	0	2	0	10.0585	10.191	10.209	10.4583	10.6875	9.5523	9.49805	9.53126	10.2217
chr1:190885334-190899571-	4	0	4	5	4	2	0	1	3	0	1	0	0	1	3	2	5	0	0	1	2	1	2	1	0	4	1	0	0	2	1	1	0	0	0	2	4	2	2	1	10.2992	8.92316	10.468	10.6771	10.468	9.98893	8.92316	9.53126	10.2217
chr1:190885334-190905118-	0	0	0	0	0	0	0	0	0	0	0	0	0	0	0	0	0	0	0	0	1	0	1	0	0	0	0	0	0	0	0	0	0	0	0	2	0	0	0	0	8.92316	8.92316	8.92316	8.92316	8.92316	8.92316	8.92316	8.92316	8.92316
chr1:191053421-191053593-	0	0	2	0	0	0	0	0	0	0	0	0	0	0	0	0	0	0	0	0	0	0	0	0	0	0	0	0	0	0	0	0	0	0	0	0	0	0	0	0	8.92316	8.92316	9.89315	8.92316	8.92316	8.92316	8.92316	8.92316	8.92316
chr1:191364057-191365322-	2	0	0	0	0	0	0	0	0	0	0	0	0	0	0	0	0	0	0	0	0	0	0	0	0	0	0	0	0	0	0	0	0	0	0	0	0	0	0	0	9.7694	8.92316	8.92316	8.92316	8.92316	8.92316	8.92316	8.92316	8.92316
chr1:191368641-191372666-	3	0	0	0	2	0	0	1	0	0	2	0	0	0	0	0	0	2	2	0	0	2	0	4	0	0	0	1	1	0	0	0	0	0	0	1	0	1	0	2	10.0585	8.92316	8.92316	8.92316	9.89321	8.92316	8.92316	9.53126	8.92316
chr1:191386023-191386440-	0	0	0	0	0	0	0	0	0	0	0	0	0	0	0	0	0	0	0	0	0	0	0	0	0	0	0	0	0	0	0	0	0	0	0	0	3	0	0	0	8.92316	8.92316	8.92316	8.92316	8.92316	8.92316	8.92316	8.92316	8.92316
chr1:191561425-191563176-	2	0	0	0	0	0	0	0	0	0	0	0	0	0	0	0	0	0	0	0	0	0	0	0	0	0	0	0	0	0	0	0	0	0	0	0	0	0	0	0	9.7694	8.92316	8.92316	8.92316	8.92316	8.92316	8.92316	8.92316	8.92316
chr1:191610026-191613742+	0	0	0	0	0	0	0	0	0	0	0	0	0	0	0	0	0	0	0	0	0	0	2	0	0	0	0	0	0	0	0	0	0	0	0	0	0	0	0	0	8.92316	8.92316	8.92316	8.92316	8.92316	8.92316	8.92316	8.92316	8.92316
chr1:191961073-191961279+	0	0	0	0	0	0	0	0	0	0	0	0	0	0	0	0	0	0	0	0	0	0	0	0	0	0	0	0	0	0	0	0	0	0	0	0	0	0	2	0	8.92316	8.92316	8.92316	8.92316	8.92316	8.92316	8.92316	8.92316	8.92316
chr1:192099822-192100079-	0	0	0	0	0	0	0	0	0	0	0	0	0	0	0	0	0	0	0	0	2	0	0	0	0	0	0	0	0	0	0	0	0	0	0	0	0	0	0	0	8.92316	8.92316	8.92316	8.92316	8.92316	8.92316	8.92316	8.92316	8.92316
chr1:192111396-192111680-	0	0	0	0	0	0	0	0	0	0	0	0	0	0	0	0	0	0	0	0	0	0	0	2	0	0	0	0	0	0	0	0	0	0	0	0	0	0	0	0	8.92316	8.92316	8.92316	8.92316	8.92316	8.92316	8.92316	8.92316	8.92316
chr1:192116269-192130460-	2	1	1	1	1	0	1	0	2	0	0	0	0	0	0	0	0	1	0	0	1	0	2	1	1	0	1	0	0	0	0	1	0	1	0	0	0	0	0	0	9.7694	9.47834	9.48818	9.48344	9.48822	8.92316	9.49805	8.92316	9.90366
chr1:192123539-192126027-	1	0	0	0	0	1	0	0	0	1	0	0	0	0	0	2	0	0	0	0	0	4	0	0	1	1	0	0	2	0	0	0	1	0	1	0	2	0	0	0	9.40746	8.92316	8.92316	8.92316	8.92316	9.5523	8.92316	8.92316	8.92316
chr1:192144437-192145450+	0	0	0	0	0	0	2	0	0	0	0	0	0	0	0	0	0	0	0	0	0	0	0	0	0	0	0	0	0	0	0	0	0	0	0	0	0	0	0	0	8.92316	8.92316	8.92316	8.92316	8.92316	8.92316	9.90803	8.92316	8.92316
chr1:192238725-192277090+	0	0	0	0	0	0	0	0	3	0	0	0	0	0	0	0	0	0	0	0	0	0	0	0	0	0	0	0	0	0	0	0	0	0	0	0	0	0	0	0	8.92316	8.92316	8.92316	8.92316	8.92316	8.92316	8.92316	8.92316	10.2217
chr1:192337400-192337829+	0	0	0	0	0	0	0	0	0	0	0	0	0	0	0	0	0	3	0	1	0	0	0	0	0	0	0	0	0	0	0	0	0	0	0	0	0	0	0	0	8.92316	8.92316	8.92316	8.92316	8.92316	8.92316	8.92316	8.92316	8.92316
chr1:192716957-192742142-	2	0	0	0	0	0	0	0	0	0	0	0	0	0	0	0	0	0	0	0	0	0	0	0	0	0	0	0	0	0	0	0	0	0	0	0	0	0	0	0	9.7694	8.92316	8.92316	8.92316	8.92316	8.92316	8.92316	8.92316	8.92316
chr1:192980346-192986882-	0	0	0	0	0	0	0	0	0	0	0	0	0	0	3	0	0	0	0	0	0	0	0	0	2	0	0	0	0	0	0	0	1	0	1	0	0	0	0	0	8.92316	8.92316	8.92316	8.92316	8.92316	8.92316	8.92316	8.92316	8.92316
chr1:193328713-193330100+	0	0	2	1	0	0	0	1	0	1	0	0	0	0	0	1	0	0	0	0	0	0	0	0	0	0	0	0	1	0	0	0	0	0	0	5	0	2	0	0	8.92316	8.92316	9.89315	9.48344	8.92316	8.92316	8.92316	9.53126	8.92316
chr1:194643686-194649638+	0	0	0	0	0	0	0	0	0	0	2	0	1	1	0	0	0	2	0	0	0	0	0	0	0	0	0	0	0	0	0	0	0	0	2	0	0	0	0	0	8.92316	8.92316	8.92316	8.92316	8.92316	8.92316	8.92316	8.92316	8.92316
chr10:3872927-3919205+	2	0	0	0	0	0	0	0	0	0	0	0	0	0	0	0	0	0	0	0	0	0	0	0	0	0	0	0	0	0	0	0	0	0	0	0	0	0	0	0	9.7694	8.92316	8.92316	8.92316	8.92316	8.92316	8.92316	8.92316	8.92316
chr10:4015514-4018599+	0	0	0	0	0	1	0	0	2	1	1	0	0	0	0	0	0	0	0	0	0	0	1	0	1	0	0	0	0	0	0	0	0	0	0	0	0	0	0	0	8.92316	8.92316	8.92316	8.92316	8.92316	9.5523	8.92316	8.92316	9.90366
chr10:4041773-4048268+	0	0	0	0	0	0	0	0	0	0	0	0	0	0	0	0	0	0	0	0	0	0	0	0	0	0	0	0	0	0	0	0	0	0	0	0	0	2	0	0	8.92316	8.92316	8.92316	8.92316	8.92316	8.92316	8.92316	8.92316	8.92316
chr10:4354810-4359101+	0	0	0	0	0	0	0	0	0	3	0	0	0	0	0	0	0	0	0	0	0	0	0	0	0	0	0	0	0	0	0	0	0	0	0	0	0	0	0	0	8.92316	8.92316	8.92316	8.92316	8.92316	8.92316	8.92316	8.92316	8.92316
chr10:4367678-4374754-	0	0	0	0	0	0	0	0	0	0	0	0	0	0	0	0	0	0	0	0	0	0	0	0	0	0	0	0	0	0	0	0	0	0	0	0	2	0	0	0	8.92316	8.92316	8.92316	8.92316	8.92316	8.92316	8.92316	8.92316	8.92316
chr10:4413309-4427691-	0	1	0	1	0	0	0	0	0	0	0	0	0	0	0	0	0	0	0	3	0	0	0	0	0	0	0	0	0	0	0	0	0	0	0	0	0	0	0	0	8.92316	9.47834	8.92316	9.48344	8.92316	8.92316	8.92316	8.92316	8.92316
chr10:5037927-5038937-	0	0	0	0	0	0	0	0	0	0	0	0	0	0	0	2	0	0	0	0	0	0	0	0	0	0	0	0	0	0	0	0	0	0	0	0	0	0	0	0	8.92316	8.92316	8.92316	8.92316	8.92316	8.92316	8.92316	8.92316	8.92316
chr10:5140812-5168878-	0	0	0	0	0	2	0	0	0	2	0	0	0	0	0	0	0	0	0	0	0	0	0	0	0	0	0	0	0	0	0	0	0	0	0	0	0	0	0	0	8.92316	8.92316	8.92316	8.92316	8.92316	9.98893	8.92316	8.92316	8.92316
chr10:5215192-5220504-	0	0	0	0	0	0	0	0	0	0	0	0	1	0	0	0	0	2	0	0	0	0	0	0	0	0	0	0	0	0	0	0	0	0	0	0	0	0	0	0	8.92316	8.92316	8.92316	8.92316	8.92316	8.92316	8.92316	8.92316	8.92316
chr10:5240168-5246486-	0	0	0	2	0	0	0	0	0	0	0	0	0	0	0	0	0	0	0	0	0	0	0	0	0	0	0	0	0	0	0	0	0	0	0	0	0	0	0	2	8.92316	8.92316	8.92316	9.88598	8.92316	8.92316	8.92316	8.92316	8.92316
chr10:5245804-5248372-	0	0	0	0	0	0	0	0	0	0	0	0	0	0	0	0	0	0	0	0	0	0	0	0	0	0	0	0	2	0	0	0	0	0	0	0	0	0	0	0	8.92316	8.92316	8.92316	8.92316	8.92316	8.92316	8.92316	8.92316	8.92316
chr10:5270807-5274393-	0	0	0	0	0	0	0	0	0	0	0	0	0	0	0	0	0	0	0	0	2	0	0	0	0	0	0	0	0	0	0	0	0	0	0	0	0	0	0	0	8.92316	8.92316	8.92316	8.92316	8.92316	8.92316	8.92316	8.92316	8.92316
chr10:5403841-5425760-	0	0	0	1	0	0	0	0	0	0	0	0	0	0	0	0	0	0	0	0	0	0	1	0	1	0	0	0	0	0	0	0	0	0	0	0	1	0	3	0	8.92316	8.92316	8.92316	9.48344	8.92316	8.92316	8.92316	8.92316	8.92316
chr10:5841272-5842625-	0	0	0	0	0	0	0	0	0	0	0	0	0	0	0	0	0	0	0	0	0	0	0	0	0	0	0	0	0	2	0	0	0	0	0	0	0	0	0	0	8.92316	8.92316	8.92316	8.92316	8.92316	8.92316	8.92316	8.92316	8.92316
chr10:6828885-6830497+	0	0	0	2	0	0	0	0	0	0	0	0	0	0	0	0	0	0	0	0	0	0	0	0	0	0	0	0	0	0	0	0	0	0	0	0	0	0	0	0	8.92316	8.92316	8.92316	9.88598	8.92316	8.92316	8.92316	8.92316	8.92316
chr10:6900570-6920086-	0	0	0	0	0	0	0	0	0	0	0	0	0	0	0	0	0	0	0	0	0	2	0	0	0	0	0	0	0	0	0	0	1	0	0	0	0	0	0	0	8.92316	8.92316	8.92316	8.92316	8.92316	8.92316	8.92316	8.92316	8.92316
chr10:6935175-6956132-	0	0	0	0	0	0	0	0	0	0	0	0	0	0	0	0	0	0	0	0	0	0	0	0	0	0	0	0	0	0	0	0	0	0	0	2	0	0	0	0	8.92316	8.92316	8.92316	8.92316	8.92316	8.92316	8.92316	8.92316	8.92316
chr10:6954670-7000484-	0	0	0	0	0	0	2	0	0	0	0	0	0	0	0	0	0	0	0	0	0	0	0	0	0	0	0	0	0	0	0	0	0	0	0	0	0	0	0	0	8.92316	8.92316	8.92316	8.92316	8.92316	8.92316	9.90803	8.92316	8.92316
chr10:7149552-7149726-	0	2	0	0	0	0	0	0	0	0	0	0	0	0	0	0	0	0	0	0	0	0	0	0	0	0	0	0	0	0	0	0	0	0	0	0	0	0	0	0	8.92316	9.87826	8.92316	8.92316	8.92316	8.92316	8.92316	8.92316	8.92316
chr10:7152864-7154485-	0	1	4	4	1	1	0	2	2	0	0	0	2	3	1	0	0	0	0	0	0	0	0	0	3	0	0	0	0	0	3	0	3	1	0	2	1	0	4	1	8.92316	9.47834	10.468	10.4583	9.48822	9.5523	8.92316	9.95773	9.90366
chr10:7152864-7160807-	0	0	2	1	1	3	0	1	2	1	0	0	0	0	1	0	0	1	3	0	1	1	0	1	0	0	3	2	1	2	0	2	0	1	0	1	0	2	0	0	8.92316	8.92316	9.89315	9.48344	9.48822	10.3237	8.92316	9.53126	9.90366
chr10:7640045-7649155-	2	0	0	1	1	1	0	0	2	0	0	0	0	0	0	0	0	1	0	0	0	0	0	1	0	2	0	0	0	0	0	1	1	1	1	0	0	0	0	1	9.7694	8.92316	8.92316	9.48344	9.48822	9.5523	8.92316	8.92316	9.90366
chr10:7669553-7676362+	0	0	0	0	0	0	0	0	0	0	0	2	1	0	0	1	0	0	0	0	0	0	1	0	1	0	0	0	0	0	0	0	0	0	0	0	0	0	0	0	8.92316	8.92316	8.92316	8.92316	8.92316	8.92316	8.92316	8.92316	8.92316
chr10:7677637-7677824-	0	0	0	0	0	0	0	0	0	0	0	0	2	0	0	0	0	0	0	0	0	0	0	0	0	0	0	0	0	0	0	0	0	0	0	0	0	0	0	0	8.92316	8.92316	8.92316	8.92316	8.92316	8.92316	8.92316	8.92316	8.92316
chr10:7691335-7691814+	0	0	0	0	0	1	0	0	0	0	0	0	0	0	0	0	0	0	2	0	0	0	0	0	0	0	0	0	0	1	0	0	0	0	0	2	0	0	0	0	8.92316	8.92316	8.92316	8.92316	8.92316	9.5523	8.92316	8.92316	8.92316
chr10:7691335-7703120+	0	0	0	0	0	0	0	1	0	1	0	0	0	0	0	0	0	2	0	0	0	0	0	0	0	0	0	0	0	0	0	0	0	0	0	3	1	0	0	0	8.92316	8.92316	8.92316	8.92316	8.92316	8.92316	8.92316	9.53126	8.92316
chr10:7701610-7703120+	1	1	3	2	2	1	1	0	4	3	0	2	1	0	0	0	0	2	2	0	1	2	3	3	0	3	4	3	2	1	0	4	0	3	0	2	1	1	0	1	9.40746	9.47834	10.209	9.88598	9.89321	9.5523	9.49805	8.92316	10.4821
chr10:7701610-7706042+	0	0	0	3	0	0	0	0	0	0	0	0	0	0	0	0	0	0	0	0	0	0	0	0	0	0	0	0	0	0	1	0	1	0	0	0	0	0	0	0	8.92316	8.92316	8.92316	10.2004	8.92316	8.92316	8.92316	8.92316	8.92316
chr10:7705460-7710647+	0	0	0	0	0	0	0	0	0	0	0	0	0	0	0	0	0	0	0	0	0	0	0	0	0	0	0	0	0	0	0	0	0	0	0	2	0	0	0	0	8.92316	8.92316	8.92316	8.92316	8.92316	8.92316	8.92316	8.92316	8.92316
chr10:7743556-7752902+	0	0	0	0	0	0	0	0	0	0	0	0	0	0	0	0	0	0	0	0	2	0	0	0	0	0	0	0	0	0	0	0	0	0	0	0	0	0	0	0	8.92316	8.92316	8.92316	8.92316	8.92316	8.92316	8.92316	8.92316	8.92316
chr10:7743556-7759823+	0	0	0	0	0	0	0	0	0	0	0	0	0	0	0	0	0	0	0	0	0	0	0	0	0	2	0	0	0	0	0	0	0	0	0	0	0	0	0	0	8.92316	8.92316	8.92316	8.92316	8.92316	8.92316	8.92316	8.92316	8.92316
chr10:7911439-7920405-	3	0	0	0	0	0	0	0	0	0	0	0	0	0	0	0	0	0	0	0	0	0	0	0	0	0	0	0	0	0	0	0	0	0	0	0	0	0	0	0	10.0585	8.92316	8.92316	8.92316	8.92316	8.92316	8.92316	8.92316	8.92316
chr10:7919114-7924872-	0	0	0	0	0	0	0	0	1	0	0	0	0	0	0	0	0	0	0	0	0	0	0	0	0	0	0	0	2	0	0	0	0	0	0	0	0	0	0	0	8.92316	8.92316	8.92316	8.92316	8.92316	8.92316	8.92316	8.92316	9.49515
chr10:8298056-8330223-	0	0	0	0	0	0	0	0	0	0	1	2	0	3	1	0	0	0	0	0	2	0	0	1	0	0	0	0	0	0	0	0	0	0	0	0	0	2	0	0	8.92316	8.92316	8.92316	8.92316	8.92316	8.92316	8.92316	8.92316	8.92316
chr10:8330068-8390931-	0	0	0	0	0	1	0	0	0	0	0	0	0	0	0	0	0	0	3	0	0	0	0	0	0	0	0	0	0	0	0	0	0	0	0	0	1	0	9	0	8.92316	8.92316	8.92316	8.92316	8.92316	9.5523	8.92316	8.92316	8.92316
chr10:8725663-8727934-	0	0	0	0	0	0	0	0	0	0	0	2	0	0	0	0	0	0	0	0	0	0	0	0	0	0	0	0	0	0	0	0	0	0	0	0	0	0	0	0	8.92316	8.92316	8.92316	8.92316	8.92316	8.92316	8.92316	8.92316	8.92316
chr10:8780519-8786434-	0	0	0	0	0	0	0	0	0	0	0	0	0	0	0	0	0	0	0	0	0	0	0	0	0	0	0	0	0	0	0	0	0	0	0	0	0	5	0	0	8.92316	8.92316	8.92316	8.92316	8.92316	8.92316	8.92316	8.92316	8.92316
chr10:8780519-8789601-	1	1	0	1	0	0	2	1	0	0	0	0	1	0	0	1	0	0	0	0	0	1	1	0	0	1	0	0	0	0	0	0	0	0	0	1	0	0	0	0	9.40746	9.47834	8.92316	9.48344	8.92316	8.92316	9.90803	9.53126	8.92316
chr10:8818967-8820377-	0	2	0	0	0	1	0	0	1	0	0	0	1	0	0	0	0	0	0	0	0	0	2	0	0	0	0	0	0	1	0	2	0	2	0	0	0	1	1	0	8.92316	9.87826	8.92316	8.92316	8.92316	9.5523	8.92316	8.92316	9.49515
chr10:9768830-9809249-	0	0	0	0	0	0	0	0	0	0	0	0	0	0	0	0	0	0	0	0	0	0	0	0	0	2	0	0	0	0	0	0	0	0	0	0	0	0	0	0	8.92316	8.92316	8.92316	8.92316	8.92316	8.92316	8.92316	8.92316	8.92316
chr10:9798122-9800068-	0	0	1	2	0	0	1	0	2	0	0	1	0	1	0	0	0	4	0	0	1	0	1	0	0	1	0	0	0	0	2	0	4	0	2	0	0	0	0	0	8.92316	8.92316	9.48818	9.88598	8.92316	8.92316	9.49805	8.92316	9.90366
chr10:9835834-9843361-	3	0	0	0	0	0	0	0	0	0	0	0	0	0	0	0	0	0	0	0	0	0	0	0	0	0	0	0	0	0	0	0	0	0	0	0	0	0	0	0	10.0585	8.92316	8.92316	8.92316	8.92316	8.92316	8.92316	8.92316	8.92316
chr10:11178734-11185462+	2	3	0	0	0	0	0	0	0	0	0	0	0	0	0	0	0	0	0	1	0	0	0	0	0	0	0	0	0	0	0	0	0	0	0	0	0	2	0	0	9.7694	10.191	8.92316	8.92316	8.92316	8.92316	8.92316	8.92316	8.92316
chr10:11178734-11194374+	0	2	0	0	0	0	0	1	0	3	0	0	0	0	0	0	0	0	0	0	0	0	0	0	0	0	0	0	0	0	0	0	0	0	0	0	0	0	0	0	8.92316	9.87826	8.92316	8.92316	8.92316	8.92316	8.92316	9.53126	8.92316
chr10:12401311-12455564-	2	0	0	0	0	0	0	0	0	0	0	0	0	0	0	0	0	0	0	0	0	0	0	1	0	0	0	0	0	0	2	0	1	0	0	0	0	0	0	0	9.7694	8.92316	8.92316	8.92316	8.92316	8.92316	8.92316	8.92316	8.92316
chr10:12413936-12455564-	0	0	0	0	0	0	0	1	0	0	0	0	0	0	0	0	0	0	0	0	0	0	2	2	0	0	1	0	0	0	0	0	0	0	0	0	0	0	0	0	8.92316	8.92316	8.92316	8.92316	8.92316	8.92316	8.92316	9.53126	8.92316
chr10:12418027-12418804-	0	0	0	0	0	0	0	0	0	0	0	3	0	0	0	0	0	0	0	0	0	0	0	0	0	0	0	0	0	0	0	0	0	0	0	0	0	0	0	0	8.92316	8.92316	8.92316	8.92316	8.92316	8.92316	8.92316	8.92316	8.92316
chr10:12421597-12442093-	0	0	2	0	0	0	0	0	0	0	0	0	0	0	0	0	0	0	0	0	0	0	0	0	0	0	0	0	0	0	0	0	0	0	0	0	0	0	0	0	8.92316	8.92316	9.89315	8.92316	8.92316	8.92316	8.92316	8.92316	8.92316
chr10:12421597-12455564-	1	1	0	2	0	0	0	0	0	0	1	1	0	2	0	0	0	0	0	0	0	2	0	0	1	2	0	0	0	1	0	0	0	0	0	0	0	0	0	0	9.40746	9.47834	8.92316	9.88598	8.92316	8.92316	8.92316	8.92316	8.92316
chr10:12433509-12455564-	0	0	2	1	0	0	0	0	0	0	0	0	0	0	0	0	0	0	0	0	0	0	1	0	1	0	0	0	0	0	0	0	0	0	0	0	0	0	0	0	8.92316	8.92316	9.89315	9.48344	8.92316	8.92316	8.92316	8.92316	8.92316
chr10:12436281-12448092-	1	0	1	1	1	0	0	0	1	0	0	0	0	0	0	0	0	0	1	0	0	0	1	2	0	0	0	1	2	3	0	0	0	0	0	2	0	0	2	0	9.40746	8.92316	9.48818	9.48344	9.48822	8.92316	8.92316	8.92316	9.49515
chr10:12436281-12455564-	10	2	3	11	4	3	7	11	12	3	4	4	4	6	2	1	5	4	5	3	7	4	9	7	10	8	9	7	5	5	3	3	3	3	1	2	11	2	6	5	11.2419	9.87826	10.209	11.5601	10.468	10.3237	11.0695	11.6816	11.6969
chr10:12463286-12501507-	0	0	0	0	0	0	0	0	0	0	0	0	2	0	0	0	0	0	0	0	0	0	0	0	0	0	0	0	0	0	0	0	0	0	0	0	0	0	0	0	8.92316	8.92316	8.92316	8.92316	8.92316	8.92316	8.92316	8.92316	8.92316
chr10:12475271-12486654-	1	0	0	2	0	0	0	0	0	0	2	0	0	1	0	0	0	0	1	0	0	0	0	0	0	0	0	0	0	0	0	0	0	0	0	0	0	0	0	0	9.40746	8.92316	8.92316	9.88598	8.92316	8.92316	8.92316	8.92316	8.92316
chr10:12525338-12538213-	2	1	0	0	0	0	0	0	0	0	0	0	0	0	0	0	0	0	0	0	0	1	0	0	0	0	0	1	0	0	1	0	0	0	0	0	0	0	2	0	9.7694	9.47834	8.92316	8.92316	8.92316	8.92316	8.92316	8.92316	8.92316
chr10:12614491-12641044-	0	0	0	0	0	0	0	0	0	0	2	1	0	1	0	0	0	0	0	0	0	0	0	0	0	0	0	0	0	0	0	0	0	0	0	0	0	0	0	0	8.92316	8.92316	8.92316	8.92316	8.92316	8.92316	8.92316	8.92316	8.92316
chr10:12621191-12654834-	0	0	0	0	0	0	0	0	0	0	0	0	0	0	0	0	0	0	0	0	0	2	0	0	0	0	0	0	0	0	0	0	0	0	0	0	0	0	0	0	8.92316	8.92316	8.92316	8.92316	8.92316	8.92316	8.92316	8.92316	8.92316
chr10:12621191-12688427-	0	0	0	0	0	0	0	0	0	0	0	0	0	0	1	0	0	0	0	0	0	0	0	0	0	0	0	0	0	0	1	0	2	0	1	0	0	0	0	0	8.92316	8.92316	8.92316	8.92316	8.92316	8.92316	8.92316	8.92316	8.92316
chr10:12633944-12654834-	0	0	0	0	0	0	0	0	0	0	0	0	0	0	0	0	0	0	0	0	0	0	0	0	0	0	0	0	0	0	0	0	0	0	0	0	0	0	2	0	8.92316	8.92316	8.92316	8.92316	8.92316	8.92316	8.92316	8.92316	8.92316
chr10:12633944-12688427-	0	0	0	0	0	0	0	0	0	0	0	0	0	0	0	0	0	0	0	0	0	0	0	0	0	0	0	0	0	0	0	0	0	0	0	0	0	3	0	0	8.92316	8.92316	8.92316	8.92316	8.92316	8.92316	8.92316	8.92316	8.92316
chr10:12636596-12641044-	0	0	0	0	0	0	0	0	0	0	0	0	0	0	0	0	0	0	0	0	0	0	0	0	0	0	0	0	0	0	1	0	5	0	0	0	0	0	0	0	8.92316	8.92316	8.92316	8.92316	8.92316	8.92316	8.92316	8.92316	8.92316
chr10:12640927-12688427-	0	0	0	0	0	0	0	0	0	0	0	0	0	0	0	0	0	0	0	0	0	3	0	0	0	0	0	0	0	0	0	0	0	0	0	0	0	0	0	0	8.92316	8.92316	8.92316	8.92316	8.92316	8.92316	8.92316	8.92316	8.92316
chr10:12643583-12658520-	0	0	0	0	0	0	0	0	0	0	0	0	0	0	0	0	0	0	0	0	0	0	0	0	0	0	0	0	0	0	0	0	0	0	0	0	0	0	2	0	8.92316	8.92316	8.92316	8.92316	8.92316	8.92316	8.92316	8.92316	8.92316
chr10:12660779-12663538-	0	0	0	0	0	0	0	0	0	0	0	0	0	0	0	0	0	0	0	0	0	0	0	0	0	0	0	0	0	0	0	0	0	0	0	0	0	0	2	1	8.92316	8.92316	8.92316	8.92316	8.92316	8.92316	8.92316	8.92316	8.92316
chr10:12675782-12676579-	0	0	0	0	0	0	0	0	0	0	0	0	0	0	2	0	0	0	0	0	0	0	0	0	0	0	0	0	0	0	0	0	0	0	0	0	0	0	0	0	8.92316	8.92316	8.92316	8.92316	8.92316	8.92316	8.92316	8.92316	8.92316
chr10:12709966-12711583-	0	0	0	0	0	0	0	0	0	0	0	0	0	0	0	0	0	0	0	0	0	0	0	0	0	0	0	0	2	0	0	0	0	0	0	0	0	0	0	0	8.92316	8.92316	8.92316	8.92316	8.92316	8.92316	8.92316	8.92316	8.92316
chr10:12713254-12727912-	0	0	0	0	0	1	0	0	2	1	0	4	0	1	0	0	0	0	0	0	0	0	0	0	0	1	0	0	0	0	0	1	0	1	0	0	0	0	0	0	8.92316	8.92316	8.92316	8.92316	8.92316	9.5523	8.92316	8.92316	9.90366
chr10:13131380-13131553+	0	0	0	0	0	0	0	0	0	0	0	0	0	0	2	0	0	0	0	0	0	0	0	0	0	0	0	0	0	0	0	0	0	0	0	0	0	0	0	0	8.92316	8.92316	8.92316	8.92316	8.92316	8.92316	8.92316	8.92316	8.92316
chr10:13212614-13213421-	0	0	0	0	0	0	0	0	0	0	0	0	0	0	0	0	0	0	0	0	0	0	0	0	0	0	0	0	0	0	0	0	0	0	0	0	0	0	0	3	8.92316	8.92316	8.92316	8.92316	8.92316	8.92316	8.92316	8.92316	8.92316
chr10:13224784-13291962-	0	0	0	0	0	0	0	0	0	0	0	0	0	0	0	0	0	0	0	0	0	0	0	0	0	2	0	0	0	0	0	0	0	0	0	0	0	0	0	0	8.92316	8.92316	8.92316	8.92316	8.92316	8.92316	8.92316	8.92316	8.92316
chr10:13442968-13447389-	0	0	0	0	0	0	0	0	1	0	0	0	0	1	0	0	0	0	0	0	0	0	1	0	0	0	0	0	0	0	0	0	0	0	0	0	4	0	0	0	8.92316	8.92316	8.92316	8.92316	8.92316	8.92316	8.92316	8.92316	9.49515
chr10:13446533-13447389-	0	0	0	0	0	0	0	0	0	0	0	0	0	0	0	0	0	0	0	0	0	0	0	3	0	0	0	0	0	0	0	0	0	0	0	0	0	0	0	0	8.92316	8.92316	8.92316	8.92316	8.92316	8.92316	8.92316	8.92316	8.92316
chr10:13507235-13507425+	0	0	0	0	0	0	0	0	0	0	1	2	0	0	0	0	0	0	0	0	0	0	0	0	0	0	0	0	0	0	0	0	0	0	0	0	0	0	0	0	8.92316	8.92316	8.92316	8.92316	8.92316	8.92316	8.92316	8.92316	8.92316
chr10:13759808-13760108-	0	0	0	0	0	0	0	0	0	0	0	0	0	0	0	0	0	0	0	0	0	0	0	0	0	0	0	0	0	0	0	0	0	0	0	3	0	0	0	0	8.92316	8.92316	8.92316	8.92316	8.92316	8.92316	8.92316	8.92316	8.92316
chr10:13759808-13760114-	0	0	0	0	0	0	0	0	0	0	0	0	0	0	0	0	0	0	2	0	0	0	0	0	0	0	0	0	0	0	0	0	0	0	0	0	0	0	0	0	8.92316	8.92316	8.92316	8.92316	8.92316	8.92316	8.92316	8.92316	8.92316
chr10:13781766-13781937-	0	0	1	0	0	0	0	0	0	0	0	0	0	0	0	0	0	0	0	0	0	1	0	0	0	0	0	0	0	0	0	0	0	0	0	2	0	0	0	0	8.92316	8.92316	9.48818	8.92316	8.92316	8.92316	8.92316	8.92316	8.92316
chr10:13801404-13801949-	0	0	0	1	0	0	1	1	1	0	0	0	0	0	0	0	0	0	0	0	0	0	0	0	0	0	0	0	0	0	0	2	0	0	0	0	0	0	0	0	8.92316	8.92316	8.92316	9.48344	8.92316	8.92316	9.49805	9.53126	9.49515
chr10:13997470-14066684+	0	0	0	0	0	0	0	0	0	0	0	0	0	0	0	0	0	0	0	0	0	0	0	0	0	0	0	2	0	0	0	0	0	0	0	0	0	0	0	0	8.92316	8.92316	8.92316	8.92316	8.92316	8.92316	8.92316	8.92316	8.92316
chr10:14004198-14066684+	3	0	0	0	0	0	0	0	1	0	0	0	0	0	0	0	0	0	0	0	0	0	0	0	0	0	0	0	0	0	0	0	0	0	0	0	0	0	0	0	10.0585	8.92316	8.92316	8.92316	8.92316	8.92316	8.92316	8.92316	9.49515
chr10:14004201-14066684+	0	1	2	0	2	2	1	0	0	1	0	1	1	0	2	0	0	0	1	1	1	0	0	0	0	0	0	0	0	1	0	0	1	1	1	0	1	0	3	0	8.92316	9.47834	9.89315	8.92316	9.89321	9.98893	9.49805	8.92316	8.92316
chr10:14004201-14086082+	0	0	1	0	0	0	0	0	0	0	0	0	0	0	0	0	0	0	0	0	0	0	0	0	0	0	0	1	3	0	0	0	0	0	0	0	0	0	0	0	8.92316	8.92316	9.48818	8.92316	8.92316	8.92316	8.92316	8.92316	8.92316
chr10:14040689-14041506+	0	0	0	0	0	0	0	0	0	0	0	0	0	0	0	0	0	0	0	0	0	0	0	0	0	0	0	0	0	0	0	0	0	0	0	0	0	0	0	2	8.92316	8.92316	8.92316	8.92316	8.92316	8.92316	8.92316	8.92316	8.92316
chr10:14055392-14066684+	0	0	0	0	0	0	0	0	0	0	0	0	0	0	2	0	0	0	0	0	0	0	0	0	0	0	0	0	0	0	0	0	0	0	0	0	0	0	0	0	8.92316	8.92316	8.92316	8.92316	8.92316	8.92316	8.92316	8.92316	8.92316
chr10:14066583-14086082+	0	0	0	0	0	0	0	0	0	0	0	0	0	0	0	0	0	2	0	0	0	0	0	0	0	2	0	0	0	0	0	0	0	0	0	0	0	0	0	0	8.92316	8.92316	8.92316	8.92316	8.92316	8.92316	8.92316	8.92316	8.92316
chr10:14066583-14117600+	0	0	0	0	0	0	0	0	0	0	0	0	0	0	0	0	0	0	2	0	0	0	0	0	0	0	0	0	0	0	0	0	0	0	0	0	0	0	0	0	8.92316	8.92316	8.92316	8.92316	8.92316	8.92316	8.92316	8.92316	8.92316
chr10:14131985-14132287+	0	0	2	0	0	0	0	0	0	0	0	0	0	0	0	0	0	0	0	0	0	0	0	0	0	0	0	0	0	0	0	0	0	0	0	0	0	0	0	0	8.92316	8.92316	9.89315	8.92316	8.92316	8.92316	8.92316	8.92316	8.92316
chr10:14675934-14687708-	0	0	0	0	0	0	0	0	0	0	0	0	0	0	0	0	0	0	0	0	0	0	0	0	0	0	0	0	2	0	0	0	0	0	0	0	0	0	0	0	8.92316	8.92316	8.92316	8.92316	8.92316	8.92316	8.92316	8.92316	8.92316
chr10:18089448-18096336+	2	1	1	4	1	3	1	1	0	5	1	4	1	3	1	3	3	3	3	1	4	1	1	4	0	1	1	6	5	1	4	1	1	0	1	1	7	0	4	3	9.7694	9.47834	9.48818	10.4583	9.48822	10.3237	9.49805	9.53126	8.92316
chr10:18089448-18107748+	0	0	0	0	0	0	0	0	0	0	0	0	0	0	0	0	0	0	0	0	0	0	0	0	2	0	0	0	0	0	0	0	0	0	0	0	0	0	0	0	8.92316	8.92316	8.92316	8.92316	8.92316	8.92316	8.92316	8.92316	8.92316
chr10:18092845-18094908+	0	0	0	2	2	1	1	1	0	5	0	0	0	0	4	1	1	2	0	1	0	0	1	2	1	0	1	0	0	2	0	0	0	0	1	0	0	0	0	0	8.92316	8.92316	8.92316	9.88598	9.89321	9.5523	9.49805	9.53126	8.92316
chr10:18092845-18096336+	0	0	0	0	0	0	0	0	0	0	0	0	0	0	0	0	0	0	2	0	0	1	0	0	0	0	0	0	0	0	0	0	0	0	0	0	0	0	0	0	8.92316	8.92316	8.92316	8.92316	8.92316	8.92316	8.92316	8.92316	8.92316
chr10:18092845-18121218+	3	0	0	0	0	0	0	1	2	2	0	0	0	0	0	1	0	0	2	1	0	0	0	0	0	0	0	0	0	1	0	0	0	0	0	2	0	0	0	0	10.0585	8.92316	8.92316	8.92316	8.92316	8.92316	8.92316	9.53126	9.90366
chr10:18346984-18347167+	0	0	0	0	0	0	0	0	0	0	0	0	0	0	0	0	0	0	0	0	2	0	0	0	0	0	0	0	0	0	0	0	0	0	0	0	0	0	0	0	8.92316	8.92316	8.92316	8.92316	8.92316	8.92316	8.92316	8.92316	8.92316
chr10:18472919-18511742+	0	0	0	0	0	0	0	0	0	0	0	0	2	0	0	0	0	0	0	0	0	0	0	0	0	0	0	0	0	0	0	0	0	0	0	0	0	0	0	0	8.92316	8.92316	8.92316	8.92316	8.92316	8.92316	8.92316	8.92316	8.92316
chr10:18512418-18513066+	0	0	0	0	0	0	0	0	0	0	0	0	0	0	0	0	0	0	2	0	0	0	0	0	0	0	0	0	0	0	0	0	0	0	0	0	0	0	0	0	8.92316	8.92316	8.92316	8.92316	8.92316	8.92316	8.92316	8.92316	8.92316
chr10:18523791-18527668+	0	0	0	0	0	0	0	0	0	0	0	0	0	0	0	0	2	0	0	0	0	0	0	0	0	0	0	0	0	0	0	0	0	0	1	0	0	0	0	0	8.92316	8.92316	8.92316	8.92316	8.92316	8.92316	8.92316	8.92316	8.92316
chr10:19556970-19557377+	0	0	0	0	0	0	0	0	0	0	0	0	0	0	0	0	0	0	0	0	0	0	0	0	0	0	0	0	0	0	2	0	0	0	0	0	0	0	0	0	8.92316	8.92316	8.92316	8.92316	8.92316	8.92316	8.92316	8.92316	8.92316
chr10:19603754-19606420+	0	0	0	0	0	0	0	0	0	0	0	0	0	0	0	1	2	0	0	0	0	0	0	0	0	0	0	0	0	0	0	0	0	0	0	0	0	0	0	0	8.92316	8.92316	8.92316	8.92316	8.92316	8.92316	8.92316	8.92316	8.92316
chr10:19869294-19894802-	0	0	0	0	0	0	0	0	0	0	0	0	0	0	0	0	0	0	0	0	0	0	0	0	0	0	0	0	0	0	0	0	0	2	0	0	0	0	0	0	8.92316	8.92316	8.92316	8.92316	8.92316	8.92316	8.92316	8.92316	8.92316
chr10:19884778-19894802-	0	0	0	0	0	0	0	0	0	0	0	0	0	0	0	0	0	1	0	2	0	0	0	0	0	1	0	0	0	0	0	0	0	0	0	0	0	0	0	0	8.92316	8.92316	8.92316	8.92316	8.92316	8.92316	8.92316	8.92316	8.92316
chr10:19888672-19894802-	0	0	0	0	0	0	0	0	0	0	0	0	0	0	0	0	0	0	0	3	0	0	0	0	0	0	0	0	0	0	0	0	0	0	0	0	0	0	0	0	8.92316	8.92316	8.92316	8.92316	8.92316	8.92316	8.92316	8.92316	8.92316
chr10:20023608-20029203+	0	0	0	0	0	1	0	0	0	2	0	0	0	0	0	0	0	0	0	0	0	0	0	0	0	0	0	0	0	0	0	0	0	0	0	0	0	0	0	0	8.92316	8.92316	8.92316	8.92316	8.92316	9.5523	8.92316	8.92316	8.92316
chr10:20058937-20079337+	0	0	0	1	0	0	0	2	0	0	0	0	0	0	0	0	0	0	0	0	0	0	0	0	0	0	0	0	0	0	0	0	0	0	0	0	0	0	0	0	8.92316	8.92316	8.92316	9.48344	8.92316	8.92316	8.92316	9.95773	8.92316
chr10:20067829-20082468+	0	2	0	0	0	0	0	0	0	0	0	0	0	0	0	0	0	0	0	0	0	0	1	0	1	0	0	0	0	0	0	1	0	0	0	0	0	0	0	0	8.92316	9.87826	8.92316	8.92316	8.92316	8.92316	8.92316	8.92316	8.92316
chr10:20067829-20094495+	0	0	0	0	0	0	0	0	0	0	2	0	0	0	0	0	0	0	0	0	0	0	0	0	0	0	0	0	0	0	0	0	0	0	0	0	0	0	0	0	8.92316	8.92316	8.92316	8.92316	8.92316	8.92316	8.92316	8.92316	8.92316
chr10:20118145-20118583+	0	0	0	0	0	0	0	0	0	0	0	0	0	0	2	0	0	1	0	0	0	1	0	0	0	0	0	0	0	0	0	0	0	0	0	0	0	0	0	0	8.92316	8.92316	8.92316	8.92316	8.92316	8.92316	8.92316	8.92316	8.92316
chr10:20245270-20246715+	0	0	0	0	0	0	0	0	0	0	0	0	0	0	0	0	0	0	0	0	0	2	0	0	0	0	0	0	0	0	0	0	0	0	0	0	0	0	0	0	8.92316	8.92316	8.92316	8.92316	8.92316	8.92316	8.92316	8.92316	8.92316
chr10:20261859-20276275+	0	0	0	0	0	0	0	0	0	2	0	0	0	0	0	0	0	0	0	0	0	0	0	0	0	0	0	0	0	0	0	0	0	0	0	0	0	0	0	0	8.92316	8.92316	8.92316	8.92316	8.92316	8.92316	8.92316	8.92316	8.92316
chr10:20434465-20443369-	0	0	0	0	0	0	2	0	0	0	0	0	0	0	0	0	0	0	0	0	1	0	0	0	0	0	0	0	0	0	0	0	0	1	0	0	0	0	0	0	8.92316	8.92316	8.92316	8.92316	8.92316	8.92316	9.90803	8.92316	8.92316
chr10:21139293-21156457-	1	2	0	0	0	0	0	0	0	1	0	0	0	0	0	1	0	0	0	0	1	0	1	0	0	1	0	0	0	0	0	0	0	0	0	0	0	0	0	0	9.40746	9.87826	8.92316	8.92316	8.92316	8.92316	8.92316	8.92316	8.92316
chr10:21299178-21307779+	0	0	0	0	0	0	0	0	1	0	0	0	0	0	0	0	0	0	0	1	0	0	1	0	0	2	2	0	0	0	0	0	0	0	0	0	0	0	0	0	8.92316	8.92316	8.92316	8.92316	8.92316	8.92316	8.92316	8.92316	9.49515
chr10:21304530-21307779+	1	0	2	1	0	0	0	0	1	1	0	2	0	0	0	0	0	3	1	0	0	0	0	1	0	0	0	0	0	0	0	0	0	1	0	0	2	1	0	5	9.40746	8.92316	9.89315	9.48344	8.92316	8.92316	8.92316	8.92316	9.49515
chr10:21336967-21349386+	2	0	0	0	0	0	0	0	0	0	0	0	0	0	0	0	0	0	0	0	0	0	0	0	0	0	0	0	0	0	0	0	0	0	0	0	0	0	0	0	9.7694	8.92316	8.92316	8.92316	8.92316	8.92316	8.92316	8.92316	8.92316
chr10:21358313-21364775+	0	0	0	0	0	0	0	0	0	0	0	0	0	0	2	0	0	0	0	0	0	0	0	0	0	0	0	0	0	0	0	0	0	0	0	0	0	0	0	0	8.92316	8.92316	8.92316	8.92316	8.92316	8.92316	8.92316	8.92316	8.92316
chr10:22705693-22712091-	8	1	2	2	2	2	1	1	5	0	0	0	0	2	0	1	0	12	3	2	1	5	1	1	1	2	1	1	0	0	0	1	0	3	1	0	6	0	6	5	10.9905	9.47834	9.89315	9.88598	9.89321	9.98893	9.49805	9.53126	10.7026
chr10:22707589-22712091-	0	0	0	0	0	0	0	0	0	0	0	0	0	0	0	0	0	0	0	0	0	0	0	0	0	0	0	1	2	0	0	0	0	0	0	0	0	0	0	0	8.92316	8.92316	8.92316	8.92316	8.92316	8.92316	8.92316	8.92316	8.92316
chr10:23109971-23159154-	0	0	0	0	0	0	0	0	0	0	0	0	0	0	2	0	0	0	0	0	0	0	0	0	0	0	0	0	0	0	0	0	0	0	0	0	0	0	0	0	8.92316	8.92316	8.92316	8.92316	8.92316	8.92316	8.92316	8.92316	8.92316
chr10:23798727-23806040+	0	0	0	0	0	0	0	0	0	0	0	0	0	0	0	0	0	0	0	0	0	0	0	2	0	0	0	0	0	0	0	0	0	0	0	0	0	0	0	0	8.92316	8.92316	8.92316	8.92316	8.92316	8.92316	8.92316	8.92316	8.92316
chr10:23798746-23806040+	0	0	0	0	0	0	0	1	0	0	1	0	1	0	0	0	0	2	1	0	2	0	0	1	0	0	0	0	1	0	0	1	0	0	1	0	0	0	0	0	8.92316	8.92316	8.92316	8.92316	8.92316	8.92316	8.92316	9.53126	8.92316
chr10:24179117-24182841+	0	0	0	0	0	1	0	0	0	0	0	0	0	0	0	1	1	0	0	0	2	0	0	0	0	0	0	0	0	0	0	0	0	0	0	0	0	0	0	0	8.92316	8.92316	8.92316	8.92316	8.92316	9.5523	8.92316	8.92316	8.92316
chr10:24580108-24583282-	0	0	0	0	0	0	0	0	0	0	0	0	0	0	0	0	0	0	0	0	0	0	0	0	0	0	0	1	4	0	0	0	0	0	0	0	0	0	0	0	8.92316	8.92316	8.92316	8.92316	8.92316	8.92316	8.92316	8.92316	8.92316
chr10:24870664-24893860+	0	0	0	0	0	0	0	0	0	0	0	0	0	0	0	2	3	0	0	0	0	0	0	0	0	0	0	0	0	0	0	0	0	0	0	0	0	0	0	0	8.92316	8.92316	8.92316	8.92316	8.92316	8.92316	8.92316	8.92316	8.92316
chr10:25217777-25289730-	0	0	0	0	0	0	0	0	0	0	0	0	3	0	0	0	0	0	0	0	0	0	0	0	0	0	0	0	0	0	0	0	0	0	0	0	0	0	0	0	8.92316	8.92316	8.92316	8.92316	8.92316	8.92316	8.92316	8.92316	8.92316
chr10:25220611-25289730-	8	5	5	13	3	4	2	2	6	4	5	3	2	0	4	2	2	0	4	4	9	1	4	3	3	1	4	2	3	3	1	3	3	3	0	5	2	7	7	1	10.9905	10.6659	10.6874	11.765	10.2091	10.5952	9.90803	9.95773	10.8938
chr10:25228300-25228487-	0	0	0	0	0	0	0	0	2	0	0	0	0	0	0	0	0	0	0	0	0	0	0	0	0	0	0	0	0	0	0	0	0	0	0	0	0	0	0	0	8.92316	8.92316	8.92316	8.92316	8.92316	8.92316	8.92316	8.92316	9.90366
chr10:25267308-25271641-	0	0	0	0	0	0	0	0	0	0	0	0	0	0	0	0	0	0	0	1	1	0	2	2	2	0	0	1	0	0	0	0	0	0	0	0	0	0	0	0	8.92316	8.92316	8.92316	8.92316	8.92316	8.92316	8.92316	8.92316	8.92316
chr10:25267308-25289730-	11	2	4	2	5	0	1	1	5	0	1	3	4	1	3	0	3	3	5	2	9	4	8	1	8	1	3	6	3	2	1	2	3	2	4	6	3	0	3	4	11.3529	9.87826	10.468	9.88598	10.6875	8.92316	9.49805	9.53126	10.7026
chr10:25283893-25289730-	0	0	0	1	0	0	0	0	3	0	0	2	0	0	0	0	0	0	0	0	0	0	2	0	0	0	0	0	0	0	0	1	0	0	0	0	0	0	0	0	8.92316	8.92316	8.92316	9.48344	8.92316	8.92316	8.92316	8.92316	10.2217
chr10:25441573-25443954+	1	5	3	2	1	0	0	2	3	1	2	1	2	0	0	0	0	2	3	0	2	0	2	2	2	6	0	1	1	0	7	2	5	2	2	3	3	6	3	0	9.40746	10.6659	10.209	9.88598	9.48822	8.92316	8.92316	9.95773	10.2217
chr10:25441573-25460896+	2	0	2	1	2	0	0	2	2	1	0	0	0	2	1	0	1	3	0	2	3	0	1	1	0	0	1	0	1	0	1	0	0	1	1	0	1	4	0	1	9.7694	8.92316	9.89315	9.48344	9.89321	8.92316	8.92316	9.95773	9.90366
chr10:25441573-25469271+	0	0	0	1	0	0	0	0	0	0	0	0	0	0	0	0	0	0	0	0	0	0	0	0	0	0	0	0	0	2	0	0	0	0	0	0	0	0	0	0	8.92316	8.92316	8.92316	9.48344	8.92316	8.92316	8.92316	8.92316	8.92316
chr10:25441573-25479765+	0	0	0	0	0	0	0	0	0	0	0	0	3	0	0	0	0	0	0	0	0	0	1	0	0	0	0	0	0	0	0	0	0	0	0	0	0	0	0	0	8.92316	8.92316	8.92316	8.92316	8.92316	8.92316	8.92316	8.92316	8.92316
chr10:25441573-25489093+	0	0	0	0	0	0	0	0	0	0	0	0	0	0	0	0	0	2	0	0	0	0	0	0	0	0	0	1	0	0	0	0	0	0	0	0	0	0	0	0	8.92316	8.92316	8.92316	8.92316	8.92316	8.92316	8.92316	8.92316	8.92316
chr10:25441573-25495591+	2	1	2	1	1	0	0	0	0	0	0	0	0	0	0	0	0	0	0	0	0	0	0	0	0	0	0	0	0	1	0	0	0	1	0	0	0	0	3	0	9.7694	9.47834	9.89315	9.48344	9.48822	8.92316	8.92316	8.92316	8.92316
chr10:25443799-25443954+	0	0	0	0	2	0	0	0	0	0	0	0	0	0	0	0	0	0	0	0	0	0	0	0	0	0	0	0	0	0	0	0	0	0	0	0	0	0	0	0	8.92316	8.92316	8.92316	8.92316	9.89321	8.92316	8.92316	8.92316	8.92316
chr10:25460792-25473163+	0	0	1	1	0	0	0	0	1	0	0	0	0	0	0	0	0	0	0	2	0	0	0	0	0	0	0	0	0	0	0	0	0	0	0	1	0	0	0	0	8.92316	8.92316	9.48818	9.48344	8.92316	8.92316	8.92316	8.92316	9.49515
chr10:25993367-25994385-	0	0	0	0	0	0	0	0	0	0	2	1	0	0	0	0	0	0	0	0	0	0	0	0	0	0	0	0	0	0	0	0	0	0	0	0	0	0	0	0	8.92316	8.92316	8.92316	8.92316	8.92316	8.92316	8.92316	8.92316	8.92316
chr10:26292641-26352375-	0	0	2	0	0	0	1	0	0	0	0	0	0	1	0	0	0	0	0	0	0	0	0	0	0	0	1	0	0	0	0	0	0	0	0	1	0	0	0	0	8.92316	8.92316	9.89315	8.92316	8.92316	8.92316	9.49805	8.92316	8.92316
chr10:26302653-26352375-	0	2	0	0	1	0	0	3	1	0	0	0	0	0	0	0	0	0	0	0	0	0	0	1	1	0	0	0	0	0	0	0	0	0	0	0	0	1	0	0	8.92316	9.87826	8.92316	8.92316	9.48822	8.92316	8.92316	10.2865	9.49515
chr10:26318377-26352375-	0	0	0	0	0	0	0	0	0	0	0	0	2	0	0	0	0	0	0	0	0	0	0	0	0	0	0	0	0	0	0	0	0	0	0	0	0	0	0	0	8.92316	8.92316	8.92316	8.92316	8.92316	8.92316	8.92316	8.92316	8.92316
chr10:26324919-26352375-	0	0	0	0	0	0	0	0	0	0	0	0	0	0	0	2	0	0	0	0	0	0	0	0	0	0	0	0	0	0	0	0	0	0	0	0	0	0	0	0	8.92316	8.92316	8.92316	8.92316	8.92316	8.92316	8.92316	8.92316	8.92316
chr10:26327687-26352375-	2	5	1	1	0	1	0	0	1	1	0	2	1	0	0	1	0	1	2	2	2	0	0	3	1	1	0	2	0	0	2	6	4	2	4	3	1	2	0	1	9.7694	10.6659	9.48818	9.48344	8.92316	9.5523	8.92316	8.92316	9.49515
chr10:26784206-26795045+	0	0	0	0	0	0	0	0	0	0	0	0	0	0	0	0	0	0	0	0	0	0	0	0	0	0	0	1	1	0	0	0	0	0	0	0	2	0	0	2	8.92316	8.92316	8.92316	8.92316	8.92316	8.92316	8.92316	8.92316	8.92316
chr10:26793113-26795045+	0	1	0	0	3	0	0	0	0	0	0	0	0	0	0	0	0	0	0	0	0	1	0	0	2	0	0	2	0	0	0	0	1	0	1	0	0	0	0	0	8.92316	9.47834	8.92316	8.92316	10.2091	8.92316	8.92316	8.92316	8.92316
chr10:26869921-26889872+	0	0	0	0	0	1	0	0	0	0	0	0	1	0	0	0	0	0	0	0	0	0	1	0	0	0	0	1	0	0	2	0	2	0	0	0	0	1	0	0	8.92316	8.92316	8.92316	8.92316	8.92316	9.5523	8.92316	8.92316	8.92316
chr10:27000717-27044578-	0	2	0	0	0	0	0	0	0	0	0	0	0	0	0	0	0	0	0	0	0	0	0	0	0	0	0	0	0	0	0	0	0	0	0	0	0	0	0	0	8.92316	9.87826	8.92316	8.92316	8.92316	8.92316	8.92316	8.92316	8.92316
chr10:27006680-27044578-	0	0	0	0	0	0	2	0	0	0	0	0	0	0	0	0	0	0	0	0	0	0	0	0	0	0	0	0	0	0	0	0	0	0	0	0	0	0	0	0	8.92316	8.92316	8.92316	8.92316	8.92316	8.92316	9.90803	8.92316	8.92316
chr10:27243671-27266710-	0	0	0	0	0	0	0	0	0	0	0	0	0	0	2	0	0	0	0	0	0	0	0	0	0	0	0	0	0	0	0	0	0	0	0	0	0	0	0	0	8.92316	8.92316	8.92316	8.92316	8.92316	8.92316	8.92316	8.92316	8.92316
chr10:28263501-28263772+	0	0	3	0	0	0	0	1	0	0	0	0	0	0	0	0	3	0	0	0	0	0	0	0	1	0	0	0	3	0	0	0	1	0	0	0	0	0	0	0	8.92316	8.92316	10.209	8.92316	8.92316	8.92316	8.92316	9.53126	8.92316
chr10:28263501-28354779+	0	0	0	0	0	2	0	0	0	0	0	0	0	0	0	0	1	0	0	0	0	0	0	0	0	0	0	0	0	0	0	0	0	0	0	0	0	0	0	0	8.92316	8.92316	8.92316	8.92316	8.92316	9.98893	8.92316	8.92316	8.92316
chr10:28314227-28314527+	0	0	0	0	2	0	0	0	0	0	0	0	0	0	0	0	0	0	0	0	0	0	0	0	0	0	0	0	0	0	0	0	0	0	0	0	0	0	0	0	8.92316	8.92316	8.92316	8.92316	9.89321	8.92316	8.92316	8.92316	8.92316
chr10:28334476-28354779+	1	0	0	0	2	0	0	0	0	0	0	0	0	0	0	0	0	0	0	0	0	0	1	2	1	0	0	0	0	0	0	0	0	1	0	2	1	0	0	0	9.40746	8.92316	8.92316	8.92316	9.89321	8.92316	8.92316	8.92316	8.92316
chr10:28334476-28383724+	0	1	1	0	0	0	0	0	0	0	0	0	1	0	0	0	0	0	0	0	0	0	0	0	1	0	1	0	0	1	0	2	0	1	0	1	1	0	0	0	8.92316	9.47834	9.48818	8.92316	8.92316	8.92316	8.92316	8.92316	8.92316
chr10:28445271-28496945+	0	0	0	0	0	0	0	0	0	0	0	0	0	0	0	0	0	0	0	0	0	0	0	2	0	0	0	0	0	0	0	0	0	0	0	0	0	0	0	0	8.92316	8.92316	8.92316	8.92316	8.92316	8.92316	8.92316	8.92316	8.92316
chr10:28465758-28466060+	0	0	0	0	0	0	0	0	0	0	0	1	0	2	0	0	0	0	0	0	0	0	0	0	0	0	0	0	0	0	0	0	0	0	0	0	0	3	0	0	8.92316	8.92316	8.92316	8.92316	8.92316	8.92316	8.92316	8.92316	8.92316
chr10:28465758-28483293+	2	0	0	0	0	0	0	0	0	0	0	0	0	0	0	0	0	0	0	0	0	0	0	0	0	0	0	0	0	0	0	0	0	0	0	0	0	0	0	1	9.7694	8.92316	8.92316	8.92316	8.92316	8.92316	8.92316	8.92316	8.92316
chr10:28465758-28496945+	0	0	0	0	0	0	0	0	0	0	0	0	0	1	0	0	0	0	0	0	0	0	0	1	0	0	0	0	0	0	0	0	0	0	1	0	3	0	0	0	8.92316	8.92316	8.92316	8.92316	8.92316	8.92316	8.92316	8.92316	8.92316
chr10:28465883-28475281+	0	0	0	0	0	1	0	1	0	2	0	0	0	0	0	0	0	0	0	0	0	0	0	0	0	0	0	0	0	0	0	0	0	0	0	0	0	0	0	0	8.92316	8.92316	8.92316	8.92316	8.92316	9.5523	8.92316	9.53126	8.92316
chr10:28517339-28518530+	0	0	0	0	0	0	0	0	0	0	0	0	0	0	0	0	0	0	0	0	0	0	0	0	0	0	0	0	2	0	0	0	0	0	0	0	0	0	0	0	8.92316	8.92316	8.92316	8.92316	8.92316	8.92316	8.92316	8.92316	8.92316
chr10:28569897-28575706+	0	0	0	0	0	0	0	0	0	0	0	0	3	0	0	0	0	2	0	0	0	2	2	0	1	0	0	0	0	0	0	0	0	0	0	1	0	0	0	0	8.92316	8.92316	8.92316	8.92316	8.92316	8.92316	8.92316	8.92316	8.92316
chr10:29224429-29224868+	2	0	0	0	0	0	0	0	0	0	0	0	0	0	0	0	0	0	0	0	0	0	0	0	0	0	0	0	0	0	0	0	0	0	0	0	0	0	0	0	9.7694	8.92316	8.92316	8.92316	8.92316	8.92316	8.92316	8.92316	8.92316
chr10:30547657-30567871-	0	0	0	0	0	0	0	0	0	0	0	0	0	1	0	0	0	0	0	0	0	0	0	0	0	0	0	0	0	0	2	0	1	0	0	0	0	0	0	0	8.92316	8.92316	8.92316	8.92316	8.92316	8.92316	8.92316	8.92316	8.92316
chr10:30590025-30591102-	0	0	0	0	0	0	0	0	0	2	0	0	0	0	0	0	0	0	0	0	0	0	0	1	0	0	0	0	0	0	0	0	0	0	0	0	0	0	0	1	8.92316	8.92316	8.92316	8.92316	8.92316	8.92316	8.92316	8.92316	8.92316
chr10:31500379-31534896-	0	0	0	0	0	0	0	0	0	0	2	3	3	3	0	0	0	0	0	0	0	0	0	0	0	0	0	0	0	0	0	0	0	0	0	0	0	0	1	0	8.92316	8.92316	8.92316	8.92316	8.92316	8.92316	8.92316	8.92316	8.92316
chr10:31500379-31570644-	0	0	0	0	0	0	0	0	0	0	0	0	0	0	3	0	0	0	0	0	0	0	0	0	0	0	0	0	0	0	0	0	0	0	0	0	0	0	0	0	8.92316	8.92316	8.92316	8.92316	8.92316	8.92316	8.92316	8.92316	8.92316
chr10:31517384-31534896-	0	0	0	0	0	0	3	0	0	0	0	0	0	0	0	1	0	0	0	1	3	0	0	0	0	0	0	1	5	0	0	0	0	0	0	0	0	0	0	0	8.92316	8.92316	8.92316	8.92316	8.92316	8.92316	10.2269	8.92316	8.92316
chr10:31534663-31534896-	0	0	0	0	0	0	2	0	0	0	0	0	0	0	0	0	0	0	0	0	0	0	0	0	0	1	0	0	0	0	0	0	0	0	0	0	0	0	0	0	8.92316	8.92316	8.92316	8.92316	8.92316	8.92316	9.90803	8.92316	8.92316
chr10:32329765-32402373-	0	0	0	0	0	0	0	0	0	0	0	0	0	0	0	0	0	0	0	0	0	2	0	0	0	0	0	0	0	0	0	0	0	0	0	0	0	0	0	0	8.92316	8.92316	8.92316	8.92316	8.92316	8.92316	8.92316	8.92316	8.92316
chr10:34001137-34012137-	1	0	0	0	2	0	0	0	0	0	0	0	0	0	0	0	0	0	0	0	0	0	0	0	0	0	0	0	0	0	0	0	0	0	0	0	0	0	0	0	9.40746	8.92316	8.92316	8.92316	9.89321	8.92316	8.92316	8.92316	8.92316
chr10:34008993-34012137-	0	1	0	0	1	0	0	2	1	3	1	1	0	0	0	0	0	1	0	0	0	0	0	0	0	0	0	0	1	0	0	0	1	1	0	1	0	0	0	0	8.92316	9.47834	8.92316	8.92316	9.48822	8.92316	8.92316	9.95773	9.49515
chr10:34310301-34324462-	0	0	0	0	0	0	0	0	0	0	0	0	0	0	0	0	0	0	0	0	0	1	0	0	0	0	0	0	0	0	0	0	0	0	0	0	0	2	0	0	8.92316	8.92316	8.92316	8.92316	8.92316	8.92316	8.92316	8.92316	8.92316
chr10:34542409-34547414+	0	2	0	0	2	0	0	0	1	0	0	2	0	0	0	0	0	0	0	0	0	1	0	0	0	0	0	0	1	0	0	0	0	0	2	0	0	0	0	0	8.92316	9.87826	8.92316	8.92316	9.89321	8.92316	8.92316	8.92316	9.49515
chr10:34547293-34591970+	0	0	0	0	0	0	0	0	0	0	0	0	0	0	0	0	0	0	0	0	0	0	0	0	0	0	0	0	1	0	1	0	0	0	0	0	4	0	0	1	8.92316	8.92316	8.92316	8.92316	8.92316	8.92316	8.92316	8.92316	8.92316
chr10:34583898-34591970+	0	0	0	0	1	0	0	1	1	1	0	0	0	0	0	1	0	0	0	0	1	1	1	0	2	0	0	0	0	0	0	1	0	2	0	0	0	3	0	3	8.92316	8.92316	8.92316	8.92316	9.48822	8.92316	8.92316	9.53126	9.49515
chr10:39144375-39145713+	0	0	1	2	0	0	0	0	0	0	0	0	0	0	0	0	0	0	0	0	0	0	0	0	0	0	0	0	0	0	0	0	0	0	0	0	0	0	0	0	8.92316	8.92316	9.48818	9.88598	8.92316	8.92316	8.92316	8.92316	8.92316
chr10:39412143-39412349+	0	0	0	0	0	0	0	0	0	0	0	0	0	0	4	0	0	0	0	0	0	0	0	0	0	0	0	0	0	0	0	0	0	0	0	0	0	0	0	0	8.92316	8.92316	8.92316	8.92316	8.92316	8.92316	8.92316	8.92316	8.92316
chr10:39639220-39641394+	0	0	0	1	0	0	0	0	0	0	0	0	0	0	0	1	0	0	0	0	0	0	0	0	0	0	1	0	0	1	0	0	0	0	0	0	0	0	2	0	8.92316	8.92316	8.92316	9.48344	8.92316	8.92316	8.92316	8.92316	8.92316
chr10:39742691-39783332+	0	0	0	0	0	0	2	0	0	0	0	0	0	0	0	0	0	0	0	0	0	0	1	0	0	0	0	0	0	0	0	0	0	0	0	0	1	0	0	0	8.92316	8.92316	8.92316	8.92316	8.92316	8.92316	9.90803	8.92316	8.92316
chr10:39742691-39799977+	0	1	1	2	0	0	0	0	0	1	1	0	0	0	0	1	0	1	0	3	0	0	0	0	0	0	0	0	0	0	0	0	0	0	0	0	0	0	0	1	8.92316	9.47834	9.48818	9.88598	8.92316	8.92316	8.92316	8.92316	8.92316
chr10:39783143-39799977+	0	0	0	0	0	0	0	0	0	0	0	0	0	0	0	0	0	0	0	0	0	2	0	0	0	0	0	0	0	0	0	0	0	0	1	0	0	0	0	2	8.92316	8.92316	8.92316	8.92316	8.92316	8.92316	8.92316	8.92316	8.92316
chr10:39783143-39806983+	0	0	0	0	2	0	0	0	0	0	0	0	0	0	0	0	0	0	1	0	0	0	0	0	0	0	0	0	0	0	0	0	0	0	0	0	0	0	0	0	8.92316	8.92316	8.92316	8.92316	9.89321	8.92316	8.92316	8.92316	8.92316
chr10:39804952-39806983+	1	0	0	0	0	1	2	0	0	0	0	0	0	0	0	0	0	0	0	0	0	0	0	0	0	0	0	0	0	0	0	0	0	0	0	0	3	0	0	2	9.40746	8.92316	8.92316	8.92316	8.92316	9.5523	9.90803	8.92316	8.92316
chr10:39832518-39846913+	0	1	0	0	0	0	0	0	0	0	0	0	0	0	0	0	0	0	0	0	1	0	0	0	0	2	1	1	1	0	0	2	0	1	2	0	0	0	0	0	8.92316	9.47834	8.92316	8.92316	8.92316	8.92316	8.92316	8.92316	8.92316
chr10:39832518-39848083+	1	1	0	0	0	0	0	0	0	0	0	0	0	0	0	0	0	0	0	0	0	0	0	0	0	0	0	2	4	0	0	0	0	0	0	0	0	0	0	0	9.40746	9.47834	8.92316	8.92316	8.92316	8.92316	8.92316	8.92316	8.92316
chr10:39847975-39852073+	0	0	0	0	0	0	0	0	0	0	0	0	0	0	0	0	0	0	0	0	0	0	0	0	0	0	0	0	0	0	0	0	0	2	1	0	0	0	0	0	8.92316	8.92316	8.92316	8.92316	8.92316	8.92316	8.92316	8.92316	8.92316
chr10:40076564-40080807-	0	0	0	0	0	0	0	0	1	0	0	0	0	0	0	0	0	2	1	0	0	0	0	0	0	0	0	2	0	0	0	0	0	1	0	2	0	0	0	0	8.92316	8.92316	8.92316	8.92316	8.92316	8.92316	8.92316	8.92316	9.49515
chr10:40233108-40239787-	0	0	0	0	0	0	0	0	1	0	0	0	0	0	0	0	0	0	0	0	0	0	0	0	0	0	0	0	1	0	0	0	0	0	0	3	0	0	1	0	8.92316	8.92316	8.92316	8.92316	8.92316	8.92316	8.92316	8.92316	9.49515
chr10:40254264-40254464-	2	0	2	1	1	0	0	0	0	0	0	0	0	0	0	0	0	1	0	0	0	0	0	0	0	0	0	0	0	0	0	0	0	0	0	0	0	0	0	0	9.7694	8.92316	9.89315	9.48344	9.48822	8.92316	8.92316	8.92316	8.92316
chr10:40394325-40436212+	0	0	0	0	0	0	0	0	0	0	2	0	0	1	0	0	0	0	0	0	0	0	0	0	0	2	1	1	0	0	0	0	0	0	0	1	0	0	1	0	8.92316	8.92316	8.92316	8.92316	8.92316	8.92316	8.92316	8.92316	8.92316
chr10:40408247-40436212+	0	0	0	0	0	0	0	0	0	0	0	0	0	2	0	0	0	0	0	0	0	0	0	0	0	0	0	0	0	0	0	0	0	0	0	0	0	0	0	0	8.92316	8.92316	8.92316	8.92316	8.92316	8.92316	8.92316	8.92316	8.92316
chr10:40434304-40436212+	0	0	1	0	0	0	0	0	0	0	0	0	1	0	0	1	0	0	0	0	0	0	0	1	0	0	3	0	0	1	0	0	0	0	1	0	0	0	2	0	8.92316	8.92316	9.48818	8.92316	8.92316	8.92316	8.92316	8.92316	8.92316
chr10:40466638-40469955+	0	0	1	0	1	0	0	0	1	0	1	0	0	0	0	0	0	0	0	0	0	3	0	0	0	0	2	0	1	0	0	1	1	0	0	0	0	0	0	0	8.92316	8.92316	9.48818	8.92316	9.48822	8.92316	8.92316	8.92316	9.49515
chr10:40475569-40480752+	0	0	0	0	0	0	0	0	0	0	0	0	0	0	0	0	0	0	0	0	0	0	0	2	0	0	0	0	0	0	0	0	0	0	0	0	0	0	0	0	8.92316	8.92316	8.92316	8.92316	8.92316	8.92316	8.92316	8.92316	8.92316
chr10:40735500-40736163+	0	0	0	0	0	0	0	0	0	0	0	2	0	0	0	0	0	0	0	0	0	0	0	0	0	0	0	0	0	0	0	0	0	0	0	0	0	0	0	0	8.92316	8.92316	8.92316	8.92316	8.92316	8.92316	8.92316	8.92316	8.92316
chr10:40841354-40852580-	0	2	0	0	0	0	0	0	0	0	0	0	0	0	0	0	0	0	0	0	0	0	0	0	0	0	0	0	0	0	0	0	0	0	0	0	0	0	0	0	8.92316	9.87826	8.92316	8.92316	8.92316	8.92316	8.92316	8.92316	8.92316
chr10:41488022-41488515-	0	0	0	0	0	0	0	0	0	0	0	0	0	0	0	0	0	0	0	0	3	0	0	0	0	0	0	0	0	0	0	0	0	0	0	0	0	0	0	0	8.92316	8.92316	8.92316	8.92316	8.92316	8.92316	8.92316	8.92316	8.92316
chr10:41494519-41507559+	1	1	0	0	0	1	0	0	0	0	0	3	0	0	4	0	0	0	1	2	0	1	4	1	5	0	0	2	1	0	1	1	0	1	1	5	0	0	2	0	9.40746	9.47834	8.92316	8.92316	8.92316	9.5523	8.92316	8.92316	8.92316
chr10:41498362-41507559+	2	0	0	0	0	0	0	0	0	0	0	0	0	0	0	0	0	0	0	1	0	0	1	0	0	0	0	0	0	0	0	0	0	0	0	2	0	1	0	0	9.7694	8.92316	8.92316	8.92316	8.92316	8.92316	8.92316	8.92316	8.92316
chr10:41501784-41503052+	0	0	0	0	0	0	0	0	0	0	0	0	0	0	0	0	0	0	0	0	0	0	0	0	0	2	0	0	0	0	0	0	0	0	0	0	0	0	0	0	8.92316	8.92316	8.92316	8.92316	8.92316	8.92316	8.92316	8.92316	8.92316
chr10:41740840-41745921-	0	0	0	0	0	0	1	0	1	0	0	0	0	0	0	0	0	0	0	0	0	0	0	0	0	0	0	0	0	0	2	0	0	0	0	0	0	0	0	0	8.92316	8.92316	8.92316	8.92316	8.92316	8.92316	9.49805	8.92316	9.49515
chr10:41947896-41975457-	0	0	0	0	0	0	0	0	0	0	0	0	0	0	0	0	0	0	0	0	0	0	0	0	0	0	0	0	0	0	0	0	2	0	0	0	0	0	0	0	8.92316	8.92316	8.92316	8.92316	8.92316	8.92316	8.92316	8.92316	8.92316
chr10:42196466-42197901-	2	5	0	0	0	3	1	0	0	0	0	2	0	0	1	1	0	2	1	0	6	0	2	3	0	2	3	1	4	2	3	0	2	1	0	3	1	2	5	4	9.7694	10.6659	8.92316	8.92316	8.92316	10.3237	9.49805	8.92316	8.92316
chr10:42226810-42227087-	0	0	0	0	0	0	0	0	0	0	0	0	0	0	0	0	0	0	0	0	0	0	0	0	0	0	0	0	0	0	0	0	0	0	0	0	0	0	4	0	8.92316	8.92316	8.92316	8.92316	8.92316	8.92316	8.92316	8.92316	8.92316
chr10:42264664-42265042-	0	0	0	0	0	0	0	0	0	0	0	2	0	0	0	0	0	0	0	0	0	0	0	0	0	0	0	0	0	0	0	0	0	0	0	0	0	0	0	0	8.92316	8.92316	8.92316	8.92316	8.92316	8.92316	8.92316	8.92316	8.92316
chr10:42360165-42415648-	0	0	0	0	0	0	0	0	0	0	0	0	2	0	0	0	0	0	0	0	0	0	0	0	0	0	0	0	0	0	0	0	0	0	0	0	0	0	0	0	8.92316	8.92316	8.92316	8.92316	8.92316	8.92316	8.92316	8.92316	8.92316
chr10:42415549-42426587-	0	0	0	0	0	0	0	0	0	0	0	0	0	0	0	0	0	0	0	0	0	0	0	0	0	0	0	0	0	0	0	0	0	0	0	0	2	0	0	0	8.92316	8.92316	8.92316	8.92316	8.92316	8.92316	8.92316	8.92316	8.92316
chr10:42415549-42438405-	0	0	0	0	0	0	0	0	0	0	0	0	0	0	0	0	0	0	0	0	0	0	2	0	1	0	0	0	0	0	0	0	0	0	0	0	0	0	0	0	8.92316	8.92316	8.92316	8.92316	8.92316	8.92316	8.92316	8.92316	8.92316
chr10:42783442-42791291+	0	0	1	0	0	1	0	0	0	0	0	0	0	0	0	2	0	1	0	0	0	0	2	0	0	0	0	0	0	0	0	0	0	0	0	0	0	0	0	0	8.92316	8.92316	9.48818	8.92316	8.92316	9.5523	8.92316	8.92316	8.92316
chr10:42783442-42803982+	0	0	0	0	0	0	0	0	0	0	0	0	1	0	0	0	0	0	0	0	0	0	0	0	0	0	0	1	0	0	0	0	0	0	0	2	0	0	0	0	8.92316	8.92316	8.92316	8.92316	8.92316	8.92316	8.92316	8.92316	8.92316
chr10:42783442-42816469+	0	1	0	0	0	0	0	0	0	0	0	0	0	0	0	0	0	1	0	0	0	0	0	2	0	0	0	0	0	0	0	0	0	0	0	0	0	0	0	0	8.92316	9.47834	8.92316	8.92316	8.92316	8.92316	8.92316	8.92316	8.92316
chr10:42789300-42797733+	1	1	0	0	1	0	0	1	0	0	0	1	0	0	0	0	0	0	0	2	1	1	0	0	0	1	0	0	2	0	1	0	1	0	2	1	2	0	1	0	9.40746	9.47834	8.92316	8.92316	9.48822	8.92316	8.92316	9.53126	8.92316
chr10:42789300-42806671+	0	2	0	0	0	1	0	0	0	0	0	0	0	0	0	0	0	0	0	0	0	0	0	0	0	0	0	0	0	0	0	0	0	1	0	0	0	0	0	0	8.92316	9.87826	8.92316	8.92316	8.92316	9.5523	8.92316	8.92316	8.92316
chr10:42789300-42816469+	0	0	0	0	0	0	0	0	0	0	1	2	0	2	0	0	0	0	0	0	0	0	0	0	0	0	0	0	0	0	0	0	1	0	0	0	0	0	0	0	8.92316	8.92316	8.92316	8.92316	8.92316	8.92316	8.92316	8.92316	8.92316
chr10:42794775-42816469+	0	2	0	0	0	0	0	0	0	0	0	0	0	0	0	0	0	0	0	0	0	0	0	0	0	0	0	0	0	0	0	0	0	0	0	0	0	0	0	0	8.92316	9.87826	8.92316	8.92316	8.92316	8.92316	8.92316	8.92316	8.92316
chr10:42797683-42803982+	0	0	0	0	0	0	0	0	0	0	0	0	0	0	0	0	0	0	0	0	0	0	0	0	0	2	0	0	0	0	0	0	0	0	0	0	0	0	0	0	8.92316	8.92316	8.92316	8.92316	8.92316	8.92316	8.92316	8.92316	8.92316
chr10:42815055-42823979+	0	1	0	0	0	0	0	0	0	0	0	0	0	0	0	0	0	0	0	0	0	0	0	0	2	0	0	0	0	0	0	0	0	0	0	0	0	0	0	0	8.92316	9.47834	8.92316	8.92316	8.92316	8.92316	8.92316	8.92316	8.92316
chr10:43019979-43022918-	0	0	0	0	0	0	0	0	0	0	0	0	0	0	0	0	0	0	0	0	2	0	0	0	0	0	0	0	0	0	0	0	0	0	0	0	0	0	0	0	8.92316	8.92316	8.92316	8.92316	8.92316	8.92316	8.92316	8.92316	8.92316
chr10:43074593-43160844-	0	0	0	0	0	0	0	0	0	0	0	0	0	0	0	0	0	0	0	0	2	0	0	0	0	0	0	0	0	0	0	0	0	0	0	0	0	0	0	3	8.92316	8.92316	8.92316	8.92316	8.92316	8.92316	8.92316	8.92316	8.92316
chr10:43127779-43160844-	0	2	0	0	1	0	0	0	0	0	0	0	0	0	0	0	0	0	0	0	0	0	0	0	0	0	0	0	0	0	0	0	0	0	0	0	0	0	0	0	8.92316	9.87826	8.92316	8.92316	9.48822	8.92316	8.92316	8.92316	8.92316
chr10:43157908-43160844-	0	1	1	0	0	0	0	0	0	1	1	0	0	0	0	0	0	0	0	0	2	0	0	0	0	0	0	0	0	0	0	0	0	0	0	0	0	0	0	0	8.92316	9.47834	9.48818	8.92316	8.92316	8.92316	8.92316	8.92316	8.92316
chr10:43296075-43316924+	0	0	0	0	0	0	0	0	0	0	0	0	0	0	0	0	0	0	0	0	0	0	0	0	0	2	0	0	0	0	0	0	0	0	0	0	0	0	0	0	8.92316	8.92316	8.92316	8.92316	8.92316	8.92316	8.92316	8.92316	8.92316
chr10:43296075-43345726+	0	0	0	0	0	0	0	0	0	0	0	0	0	0	3	0	0	0	0	0	0	0	0	0	0	0	0	0	0	0	0	0	0	0	0	0	0	0	0	0	8.92316	8.92316	8.92316	8.92316	8.92316	8.92316	8.92316	8.92316	8.92316
chr10:43345528-43372209+	0	0	0	0	0	0	0	0	0	0	1	0	0	0	0	0	0	0	0	0	4	0	0	0	0	0	0	0	0	0	0	0	0	0	0	0	0	0	0	0	8.92316	8.92316	8.92316	8.92316	8.92316	8.92316	8.92316	8.92316	8.92316
chr10:43393871-43395692+	1	1	1	1	3	1	0	1	2	0	0	4	0	1	0	0	0	0	0	1	1	0	0	0	0	0	0	0	0	0	0	0	0	0	0	0	0	0	1	0	9.40746	9.47834	9.48818	9.48344	10.2091	9.5523	8.92316	9.53126	9.90366
chr10:43393871-43413547+	0	1	0	1	0	1	0	1	1	1	0	0	0	1	0	1	0	0	0	0	1	2	0	2	0	0	0	0	0	0	1	0	1	0	1	0	0	0	0	0	8.92316	9.47834	8.92316	9.48344	8.92316	9.5523	8.92316	9.53126	9.49515
chr10:43393871-43479372+	0	0	0	0	0	0	0	0	0	0	0	0	0	0	0	0	0	0	0	0	0	0	0	0	0	0	0	0	0	0	0	0	0	0	0	4	0	0	0	0	8.92316	8.92316	8.92316	8.92316	8.92316	8.92316	8.92316	8.92316	8.92316
chr10:43582807-43583945+	0	0	0	0	0	0	0	0	0	0	0	0	0	0	0	0	0	0	0	0	0	2	0	0	0	0	0	0	0	0	0	0	0	0	0	0	0	0	0	0	8.92316	8.92316	8.92316	8.92316	8.92316	8.92316	8.92316	8.92316	8.92316
chr10:43582813-43583945+	0	0	0	0	0	0	0	0	0	0	0	0	2	0	0	0	0	0	0	0	0	0	0	0	0	0	0	0	0	0	0	0	0	0	0	0	0	0	0	0	8.92316	8.92316	8.92316	8.92316	8.92316	8.92316	8.92316	8.92316	8.92316
chr10:43928323-43936091+	0	0	0	0	0	0	0	0	0	0	0	0	0	0	0	0	0	1	0	0	0	3	0	0	0	0	0	0	0	0	0	0	0	0	0	0	2	0	0	0	8.92316	8.92316	8.92316	8.92316	8.92316	8.92316	8.92316	8.92316	8.92316
chr10:43964578-43966413-	0	0	2	0	0	0	0	0	0	0	0	0	0	0	0	0	0	0	0	0	0	1	0	0	0	0	0	0	0	0	0	0	0	0	0	0	0	0	0	0	8.92316	8.92316	9.89315	8.92316	8.92316	8.92316	8.92316	8.92316	8.92316
chr10:43970079-43971071-	0	0	0	0	0	0	0	0	0	0	0	0	0	0	0	0	0	0	0	0	0	0	0	0	0	0	0	0	0	0	0	0	0	0	0	0	2	0	0	0	8.92316	8.92316	8.92316	8.92316	8.92316	8.92316	8.92316	8.92316	8.92316
chr10:43973658-43992705-	0	0	0	0	0	0	0	0	0	0	0	2	0	3	0	0	0	0	0	0	0	0	0	0	0	0	0	0	0	0	0	0	0	0	0	0	0	0	0	0	8.92316	8.92316	8.92316	8.92316	8.92316	8.92316	8.92316	8.92316	8.92316
chr10:43986251-43999347-	0	0	0	0	1	0	0	0	0	2	0	0	0	0	0	0	0	0	0	0	0	0	0	0	0	0	0	0	0	1	0	0	0	0	0	0	6	0	0	3	8.92316	8.92316	8.92316	8.92316	9.48822	8.92316	8.92316	8.92316	8.92316
chr10:43989094-43999347-	0	0	0	0	0	0	0	0	0	0	0	0	0	0	0	0	0	1	0	0	0	0	0	0	0	3	0	0	0	0	0	0	0	0	0	0	0	0	0	0	8.92316	8.92316	8.92316	8.92316	8.92316	8.92316	8.92316	8.92316	8.92316
chr10:43992158-43992402-	0	0	0	0	0	0	0	0	0	0	0	0	0	0	0	0	0	0	0	0	0	0	0	0	0	0	0	0	0	0	0	0	0	0	0	0	2	0	0	0	8.92316	8.92316	8.92316	8.92316	8.92316	8.92316	8.92316	8.92316	8.92316
chr10:45072053-45097514+	0	0	0	0	0	0	0	0	0	0	2	0	0	0	0	0	0	0	0	0	0	0	0	0	0	0	0	0	0	0	0	0	0	0	0	0	0	0	0	0	8.92316	8.92316	8.92316	8.92316	8.92316	8.92316	8.92316	8.92316	8.92316
chr10:45090993-45097514+	0	0	0	0	0	0	2	0	0	0	2	1	0	1	0	0	0	0	0	0	0	0	0	0	0	0	0	0	0	0	0	0	0	3	0	0	0	0	0	0	8.92316	8.92316	8.92316	8.92316	8.92316	8.92316	9.90803	8.92316	8.92316
chr10:45370561-45371905+	0	0	0	0	0	0	0	0	0	0	0	0	0	0	2	0	0	0	0	0	0	0	0	0	0	0	0	0	0	0	0	0	0	0	0	0	0	0	0	0	8.92316	8.92316	8.92316	8.92316	8.92316	8.92316	8.92316	8.92316	8.92316
chr10:45588380-45618629+	0	0	1	1	0	0	0	0	0	0	0	0	0	0	0	0	0	0	0	0	0	0	0	0	0	0	0	0	0	0	0	0	0	0	0	0	0	0	0	2	8.92316	8.92316	9.48818	9.48344	8.92316	8.92316	8.92316	8.92316	8.92316
chr10:45605509-45652738+	0	0	0	0	0	0	0	0	0	0	0	0	0	0	0	0	2	0	0	0	0	0	0	0	0	0	0	0	0	0	0	0	0	0	0	0	0	3	0	0	8.92316	8.92316	8.92316	8.92316	8.92316	8.92316	8.92316	8.92316	8.92316
chr10:45618498-45652738+	1	0	0	1	0	0	0	0	0	0	1	0	0	0	0	0	0	0	0	0	2	0	0	4	0	0	1	0	0	1	0	0	0	0	0	0	0	0	0	0	9.40746	8.92316	8.92316	9.48344	8.92316	8.92316	8.92316	8.92316	8.92316
chr10:45638321-45686733+	0	0	1	0	0	0	0	0	1	0	0	0	0	0	0	0	0	0	0	0	0	0	0	1	0	0	0	0	0	0	0	0	0	0	1	0	0	0	0	2	8.92316	8.92316	9.48818	8.92316	8.92316	8.92316	8.92316	8.92316	9.49515
chr10:45649881-45672861+	0	0	0	0	0	0	0	0	0	0	0	0	0	0	0	0	0	0	0	0	0	0	0	0	0	0	0	0	0	0	2	0	0	0	0	0	0	0	0	0	8.92316	8.92316	8.92316	8.92316	8.92316	8.92316	8.92316	8.92316	8.92316
chr10:45670346-45671526+	0	0	0	0	0	0	0	0	0	2	0	0	0	0	0	0	0	0	0	0	0	0	0	0	0	0	0	0	0	0	0	0	0	0	0	0	0	0	0	0	8.92316	8.92316	8.92316	8.92316	8.92316	8.92316	8.92316	8.92316	8.92316
chr10:45670346-45686733+	0	0	0	0	0	0	3	0	0	0	0	0	0	0	0	0	0	0	0	0	0	0	0	0	0	0	0	0	0	0	0	0	0	0	1	2	0	0	0	1	8.92316	8.92316	8.92316	8.92316	8.92316	8.92316	10.2269	8.92316	8.92316
chr10:50604751-50618271+	0	0	2	0	0	0	1	0	0	0	0	0	2	0	0	0	2	1	0	0	0	0	1	0	0	0	0	0	0	0	0	0	0	2	0	0	0	1	0	0	8.92316	8.92316	9.89315	8.92316	8.92316	8.92316	9.49805	8.92316	8.92316
chr10:50617712-50618271+	0	0	0	0	0	0	0	0	0	0	0	0	0	0	0	0	0	0	0	0	1	0	0	0	0	0	1	0	0	0	0	0	0	0	0	2	0	0	0	0	8.92316	8.92316	8.92316	8.92316	8.92316	8.92316	8.92316	8.92316	8.92316
chr10:50617712-50660726+	0	0	0	0	0	0	0	0	0	1	0	0	0	3	0	0	0	0	0	0	0	0	0	1	0	0	0	0	0	0	0	0	0	0	0	0	0	0	0	0	8.92316	8.92316	8.92316	8.92316	8.92316	8.92316	8.92316	8.92316	8.92316
chr10:50637908-50660726+	0	0	1	0	0	0	1	0	0	0	0	0	0	0	0	0	0	0	0	0	0	0	0	0	0	0	0	0	0	0	0	1	0	3	0	0	0	0	1	0	8.92316	8.92316	9.48818	8.92316	8.92316	8.92316	9.49805	8.92316	8.92316
chr10:50658918-50660726+	0	0	0	0	0	0	0	0	0	0	0	0	0	0	0	0	0	0	3	2	0	0	0	0	0	0	0	0	0	0	0	0	0	0	0	0	0	0	0	0	8.92316	8.92316	8.92316	8.92316	8.92316	8.92316	8.92316	8.92316	8.92316
chr10:50658918-50711044+	0	2	0	0	0	0	0	0	0	0	0	0	0	0	0	0	0	0	0	0	0	0	0	0	0	0	0	0	0	0	0	0	0	0	0	0	0	0	0	0	8.92316	9.87826	8.92316	8.92316	8.92316	8.92316	8.92316	8.92316	8.92316
chr10:50748806-50754122+	0	0	0	0	0	0	0	0	0	0	0	0	3	1	0	1	1	0	0	0	1	0	1	0	0	1	1	0	0	1	0	1	0	1	1	0	0	0	1	0	8.92316	8.92316	8.92316	8.92316	8.92316	8.92316	8.92316	8.92316	8.92316
chr10:50748806-50767507+	10	8	2	5	3	1	3	4	3	5	3	1	2	4	1	7	7	3	1	3	8	4	4	10	6	5	11	8	3	7	4	4	4	8	6	5	1	8	4	5	11.2419	11.1726	9.89315	10.6771	10.2091	9.5523	10.2269	10.554	10.2217
chr10:50748806-50770383+	1	0	0	0	0	0	0	0	0	0	0	0	0	0	0	0	0	0	0	0	0	0	1	1	1	0	0	0	0	0	1	0	2	0	0	0	0	0	2	1	9.40746	8.92316	8.92316	8.92316	8.92316	8.92316	8.92316	8.92316	8.92316
chr10:50748806-50823860+	0	0	0	0	0	0	0	0	0	0	0	0	0	0	0	0	0	0	2	0	0	0	0	0	0	0	0	0	0	0	0	0	0	0	0	0	0	0	0	0	8.92316	8.92316	8.92316	8.92316	8.92316	8.92316	8.92316	8.92316	8.92316
chr10:50767091-50823860+	0	0	2	1	0	0	0	0	0	0	0	0	0	0	0	0	0	0	0	0	0	0	0	0	0	0	0	0	0	0	0	0	0	0	0	0	0	0	0	0	8.92316	8.92316	9.89315	9.48344	8.92316	8.92316	8.92316	8.92316	8.92316
chr10:52259600-52261939+	0	0	0	0	0	0	0	0	0	0	0	0	0	0	0	0	0	0	0	0	0	0	1	0	2	0	0	0	0	0	0	0	0	0	0	0	0	0	0	0	8.92316	8.92316	8.92316	8.92316	8.92316	8.92316	8.92316	8.92316	8.92316
chr10:52261727-52263164+	0	0	0	0	0	0	0	0	0	0	0	0	0	0	0	0	0	0	0	0	0	0	0	0	0	0	0	0	0	0	0	0	0	0	0	0	5	0	0	1	8.92316	8.92316	8.92316	8.92316	8.92316	8.92316	8.92316	8.92316	8.92316
chr10:52261727-52290923+	0	0	0	3	0	1	0	0	0	0	0	0	0	0	0	0	1	0	0	0	0	0	0	0	0	1	0	0	0	0	0	1	0	0	0	0	1	1	0	0	8.92316	8.92316	8.92316	10.2004	8.92316	9.5523	8.92316	8.92316	8.92316
chr10:52283292-52283545+	0	0	0	0	0	0	0	0	0	0	0	0	0	3	0	0	0	0	0	0	0	0	0	0	0	0	0	0	0	0	0	0	0	0	0	0	0	0	0	0	8.92316	8.92316	8.92316	8.92316	8.92316	8.92316	8.92316	8.92316	8.92316
chr10:52284103-52290923+	0	0	0	0	0	0	0	0	1	0	0	3	0	0	0	0	2	0	0	0	0	0	0	0	0	0	0	0	1	0	0	0	1	0	0	1	2	0	1	0	8.92316	8.92316	8.92316	8.92316	8.92316	8.92316	8.92316	8.92316	9.49515
chr10:52429193-52436663+	1	0	2	1	0	0	0	2	2	1	1	2	0	0	1	0	0	1	1	3	1	4	1	0	2	2	4	0	1	1	1	0	0	0	2	2	1	0	1	2	9.40746	8.92316	9.89315	9.48344	8.92316	8.92316	8.92316	9.95773	9.90366
chr10:52544607-52545267-	0	1	1	0	0	0	0	0	0	0	0	0	0	0	0	1	0	0	0	0	1	1	1	0	1	0	0	0	2	1	0	1	0	0	0	0	0	0	0	0	8.92316	9.47834	9.48818	8.92316	8.92316	8.92316	8.92316	8.92316	8.92316
chr10:52544631-52545267-	0	0	0	0	0	0	0	0	0	0	0	0	0	0	0	0	0	0	0	0	0	0	0	0	0	0	0	0	0	2	0	0	0	0	0	0	0	0	0	0	8.92316	8.92316	8.92316	8.92316	8.92316	8.92316	8.92316	8.92316	8.92316
chr10:53077897-53108357+	0	0	0	0	0	0	0	0	0	0	0	0	0	0	0	0	0	0	0	0	0	2	0	0	0	0	0	0	0	0	0	0	0	0	0	0	0	0	0	0	8.92316	8.92316	8.92316	8.92316	8.92316	8.92316	8.92316	8.92316	8.92316
chr10:53547403-53563457-	0	0	0	0	0	0	0	0	0	0	0	0	0	0	0	0	0	0	0	0	0	0	0	0	0	0	2	0	0	0	0	0	0	0	0	0	0	0	0	0	8.92316	8.92316	8.92316	8.92316	8.92316	8.92316	8.92316	8.92316	8.92316
chr10:53611352-53616052-	0	0	0	0	0	0	0	0	0	0	0	0	0	0	0	0	0	0	2	0	0	0	0	0	0	0	0	0	0	0	0	0	0	0	0	0	0	0	0	1	8.92316	8.92316	8.92316	8.92316	8.92316	8.92316	8.92316	8.92316	8.92316
chr10:53977023-53994436-	1	0	0	0	0	0	2	0	0	0	0	0	0	0	0	0	0	0	0	0	0	0	0	0	0	0	0	0	0	0	0	0	0	0	0	0	0	0	0	0	9.40746	8.92316	8.92316	8.92316	8.92316	8.92316	9.90803	8.92316	8.92316
chr10:56027899-56040279-	3	0	0	0	0	0	0	0	0	0	0	0	0	0	0	0	0	0	0	0	0	0	0	0	0	0	0	0	0	0	0	0	0	0	0	0	0	0	0	0	10.0585	8.92316	8.92316	8.92316	8.92316	8.92316	8.92316	8.92316	8.92316
chr10:56123511-56151853-	0	4	0	0	0	0	0	0	0	0	0	0	0	0	0	0	0	0	0	0	0	0	0	1	1	0	0	0	0	0	0	0	0	0	2	0	0	0	0	0	8.92316	10.4479	8.92316	8.92316	8.92316	8.92316	8.92316	8.92316	8.92316
chr10:56123511-56162212-	0	0	0	0	1	0	0	0	0	0	0	0	0	0	0	0	0	0	0	0	0	0	0	0	0	0	0	0	0	0	2	0	0	0	0	0	0	0	0	0	8.92316	8.92316	8.92316	8.92316	9.48822	8.92316	8.92316	8.92316	8.92316
chr10:56170844-56180620-	0	0	0	0	0	0	0	0	0	0	0	0	0	0	0	0	0	0	0	0	0	0	0	0	0	0	0	0	0	0	0	0	0	0	0	0	0	3	0	0	8.92316	8.92316	8.92316	8.92316	8.92316	8.92316	8.92316	8.92316	8.92316
chr10:56170844-56201956-	0	0	0	0	0	0	0	0	0	0	0	0	0	0	0	0	0	0	0	0	0	0	0	0	0	0	0	0	0	0	0	0	0	0	0	2	0	0	0	0	8.92316	8.92316	8.92316	8.92316	8.92316	8.92316	8.92316	8.92316	8.92316
chr10:56187743-56201956-	0	0	0	0	0	0	0	0	0	0	0	2	0	1	0	0	0	0	0	0	0	0	0	0	0	0	0	0	0	0	0	0	0	0	0	0	0	0	0	0	8.92316	8.92316	8.92316	8.92316	8.92316	8.92316	8.92316	8.92316	8.92316
chr10:57495898-57506302+	0	0	0	0	0	2	0	0	1	0	0	0	0	0	0	0	0	0	0	0	0	0	0	0	0	0	0	0	0	0	0	0	0	0	1	0	0	0	0	0	8.92316	8.92316	8.92316	8.92316	8.92316	9.98893	8.92316	8.92316	9.49515
chr10:57509529-57509807+	0	0	0	0	0	0	2	0	0	0	0	0	0	0	0	0	0	0	0	0	0	0	0	0	0	0	0	0	0	0	0	0	0	0	0	0	0	0	0	0	8.92316	8.92316	8.92316	8.92316	8.92316	8.92316	9.90803	8.92316	8.92316
chr10:58285943-58292782+	0	0	1	0	2	0	0	0	0	0	0	0	0	0	0	0	0	0	1	0	0	0	1	0	0	0	0	0	0	0	0	0	0	0	0	0	0	0	0	0	8.92316	8.92316	9.48818	8.92316	9.89321	8.92316	8.92316	8.92316	8.92316
chr10:58349907-58350107+	0	0	1	0	0	0	0	0	0	0	0	0	0	0	0	0	0	0	2	0	0	0	0	0	0	1	0	0	0	0	0	2	0	0	0	0	0	0	3	1	8.92316	8.92316	9.48818	8.92316	8.92316	8.92316	8.92316	8.92316	8.92316
chr10:58355571-58355785+	0	0	0	0	0	0	0	0	0	0	0	0	0	0	0	0	0	0	0	0	0	0	0	0	0	0	0	0	0	0	2	0	0	0	0	0	0	0	0	0	8.92316	8.92316	8.92316	8.92316	8.92316	8.92316	8.92316	8.92316	8.92316
chr10:58408070-58410202+	1	0	0	0	0	0	0	0	0	0	0	0	0	0	0	0	0	0	0	0	0	0	0	0	0	0	0	0	0	0	0	0	0	0	0	0	0	0	0	2	9.40746	8.92316	8.92316	8.92316	8.92316	8.92316	8.92316	8.92316	8.92316
chr10:58454573-58457784+	0	2	0	0	0	1	0	0	0	1	0	0	0	0	0	1	0	0	0	0	0	1	0	1	0	0	0	0	2	0	1	0	0	0	0	1	0	0	1	0	8.92316	9.87826	8.92316	8.92316	8.92316	9.5523	8.92316	8.92316	8.92316
chr10:58454573-58462045+	0	2	0	0	0	0	0	0	0	0	0	0	0	0	0	0	0	0	0	0	0	0	0	0	0	0	0	0	0	0	0	0	0	0	0	0	0	0	0	0	8.92316	9.87826	8.92316	8.92316	8.92316	8.92316	8.92316	8.92316	8.92316
chr10:58467115-58467473+	0	0	0	0	0	0	0	0	0	0	0	0	0	0	0	0	0	0	2	0	0	0	0	0	0	0	0	0	0	0	0	0	0	0	0	0	0	0	0	0	8.92316	8.92316	8.92316	8.92316	8.92316	8.92316	8.92316	8.92316	8.92316
chr10:58477694-58477870+	0	0	0	0	0	0	0	0	0	0	0	2	2	0	0	0	0	0	0	0	0	0	0	0	0	0	0	0	0	0	0	0	0	0	0	0	0	0	0	0	8.92316	8.92316	8.92316	8.92316	8.92316	8.92316	8.92316	8.92316	8.92316
chr10:58488573-58490755+	0	0	0	0	0	0	0	0	1	0	0	0	0	0	0	0	0	0	0	0	0	0	0	0	0	0	0	0	0	0	0	1	0	0	0	2	0	0	0	0	8.92316	8.92316	8.92316	8.92316	8.92316	8.92316	8.92316	8.92316	9.49515
chr10:58490610-58493136+	0	0	0	0	0	0	1	2	0	0	0	1	0	1	0	0	0	0	0	0	0	0	0	0	0	0	0	0	0	0	0	0	0	1	0	0	4	0	0	0	8.92316	8.92316	8.92316	8.92316	8.92316	8.92316	9.49805	9.95773	8.92316
chr10:58527342-58529012+	0	0	0	0	0	0	0	0	0	0	0	0	0	0	0	0	0	0	0	0	0	0	0	0	0	0	0	0	0	0	0	2	0	0	0	0	0	0	0	0	8.92316	8.92316	8.92316	8.92316	8.92316	8.92316	8.92316	8.92316	8.92316
chr10:59166504-59178857-	0	0	1	2	1	0	3	0	1	0	0	0	0	0	0	4	2	1	0	0	0	2	1	0	0	2	0	0	4	0	1	0	0	2	2	0	1	0	0	0	8.92316	8.92316	9.48818	9.88598	9.48822	8.92316	10.2269	8.92316	9.49515
chr10:59166504-59192815-	1	0	0	0	0	0	0	0	0	1	0	0	0	0	0	1	0	0	1	2	0	0	0	0	0	2	0	0	0	0	0	0	0	0	0	2	0	1	0	0	9.40746	8.92316	8.92316	8.92316	8.92316	8.92316	8.92316	8.92316	8.92316
chr10:59192166-59192815-	3	1	2	0	0	0	0	0	0	0	1	1	0	2	0	1	0	0	1	0	1	0	0	0	0	0	0	0	0	0	1	0	0	0	1	0	0	0	0	0	10.0585	9.47834	9.89315	8.92316	8.92316	8.92316	8.92316	8.92316	8.92316
chr10:59337054-59342835+	0	0	0	0	0	0	0	0	2	0	0	0	0	0	0	0	0	0	0	0	0	0	0	0	0	0	0	0	0	0	0	0	0	0	0	0	0	0	0	0	8.92316	8.92316	8.92316	8.92316	8.92316	8.92316	8.92316	8.92316	9.90366
chr10:59337054-59343794+	0	0	0	0	0	0	0	0	0	0	0	0	0	0	0	0	0	0	0	0	0	0	0	0	0	0	0	0	0	4	0	0	0	0	0	0	0	0	0	0	8.92316	8.92316	8.92316	8.92316	8.92316	8.92316	8.92316	8.92316	8.92316
chr10:59482538-59482690-	0	0	0	0	0	0	0	0	0	0	0	0	0	0	0	0	0	0	0	0	0	0	0	0	0	0	0	0	0	0	0	0	2	0	0	0	0	0	0	0	8.92316	8.92316	8.92316	8.92316	8.92316	8.92316	8.92316	8.92316	8.92316
chr10:59589357-59591595-	0	0	0	0	0	0	0	0	0	0	0	0	0	0	0	0	0	0	0	0	0	0	0	0	0	0	0	0	0	0	0	0	0	0	0	2	0	0	0	0	8.92316	8.92316	8.92316	8.92316	8.92316	8.92316	8.92316	8.92316	8.92316
chr10:59599928-59600693-	0	0	0	2	0	0	0	0	1	0	0	0	0	0	0	0	0	0	0	0	0	0	0	0	0	0	0	0	0	0	0	0	0	0	0	0	0	0	0	0	8.92316	8.92316	8.92316	9.88598	8.92316	8.92316	8.92316	8.92316	9.49515
chr10:59727957-59733157+	0	0	0	0	0	0	0	0	0	0	0	0	0	0	0	0	0	0	0	0	0	0	0	0	0	0	0	0	0	2	0	0	0	0	0	2	0	0	0	0	8.92316	8.92316	8.92316	8.92316	8.92316	8.92316	8.92316	8.92316	8.92316
chr10:59763000-59763454+	0	0	0	0	0	0	0	0	0	0	0	0	2	0	0	0	0	0	0	0	0	0	0	0	0	0	0	0	0	0	0	0	0	0	0	0	0	0	0	0	8.92316	8.92316	8.92316	8.92316	8.92316	8.92316	8.92316	8.92316	8.92316
chr10:60004795-60013774+	0	0	0	0	0	0	0	0	0	0	0	0	0	2	0	0	0	0	0	0	0	1	0	0	0	0	0	0	0	0	0	0	0	0	0	0	0	0	0	0	8.92316	8.92316	8.92316	8.92316	8.92316	8.92316	8.92316	8.92316	8.92316
chr10:60031514-60064408+	0	0	0	0	0	0	0	0	0	0	0	0	0	0	0	0	0	0	0	0	0	0	0	0	0	0	0	0	0	0	2	0	0	0	0	0	0	0	0	0	8.92316	8.92316	8.92316	8.92316	8.92316	8.92316	8.92316	8.92316	8.92316
chr10:60042121-60064408+	0	0	0	0	0	0	0	0	0	0	0	0	0	0	0	0	0	1	0	0	0	0	0	0	0	0	0	2	0	0	0	0	0	0	0	0	0	0	0	0	8.92316	8.92316	8.92316	8.92316	8.92316	8.92316	8.92316	8.92316	8.92316
chr10:60301865-60302563+	0	0	0	0	0	0	0	0	0	2	0	0	0	0	0	0	0	0	0	0	0	0	0	0	0	0	0	0	0	0	0	0	0	0	0	0	0	0	0	0	8.92316	8.92316	8.92316	8.92316	8.92316	8.92316	8.92316	8.92316	8.92316
chr10:60778168-60783282-	0	0	0	0	0	0	2	0	0	0	0	0	0	0	0	0	0	0	0	0	0	0	0	0	0	0	0	0	0	0	0	0	0	0	0	0	0	0	0	0	8.92316	8.92316	8.92316	8.92316	8.92316	8.92316	9.90803	8.92316	8.92316
chr10:61580337-61580563+	0	0	0	0	0	0	0	0	0	0	0	0	0	0	0	0	0	0	0	0	0	0	0	0	0	0	0	0	0	0	0	0	0	0	0	0	0	3	0	0	8.92316	8.92316	8.92316	8.92316	8.92316	8.92316	8.92316	8.92316	8.92316
chr10:61660912-61665466+	1	0	0	1	1	0	0	1	0	0	0	0	0	0	0	0	0	0	0	0	0	0	0	0	2	0	0	0	0	0	0	0	0	0	0	0	3	0	0	0	9.40746	8.92316	8.92316	9.48344	9.48822	8.92316	8.92316	9.53126	8.92316
chr10:61692849-61693262+	0	0	0	0	0	0	0	0	0	0	0	0	0	0	0	0	0	0	0	0	0	0	0	2	0	0	0	0	0	0	0	0	0	0	0	0	0	0	0	0	8.92316	8.92316	8.92316	8.92316	8.92316	8.92316	8.92316	8.92316	8.92316
chr10:62201778-62203265-	0	0	0	0	0	0	0	0	0	0	0	0	0	0	0	0	0	0	0	0	0	0	0	0	0	0	0	1	0	0	0	0	0	0	0	0	0	0	0	2	8.92316	8.92316	8.92316	8.92316	8.92316	8.92316	8.92316	8.92316	8.92316
chr10:62204388-62204680-	0	0	0	0	0	0	0	0	0	0	0	0	3	0	0	0	0	0	0	0	0	0	0	0	0	0	0	0	0	0	0	0	0	0	0	0	0	0	0	0	8.92316	8.92316	8.92316	8.92316	8.92316	8.92316	8.92316	8.92316	8.92316
chr10:62214249-62214779-	1	1	0	1	2	0	1	1	0	0	0	0	1	0	0	0	0	0	0	1	0	1	0	1	1	2	1	0	0	0	0	0	0	0	0	0	1	0	0	1	9.40746	9.47834	8.92316	9.48344	9.89321	8.92316	9.49805	9.53126	8.92316
chr10:62284279-62284849-	0	0	0	0	0	0	0	0	0	0	0	3	0	0	0	0	0	0	0	0	0	0	0	0	0	0	0	0	0	0	0	0	0	0	0	0	0	0	0	0	8.92316	8.92316	8.92316	8.92316	8.92316	8.92316	8.92316	8.92316	8.92316
chr10:62408615-62411626-	0	0	1	3	0	0	0	0	0	0	0	0	0	0	0	0	0	0	0	0	0	0	0	0	0	0	0	0	0	0	0	0	0	0	0	0	0	0	0	0	8.92316	8.92316	9.48818	10.2004	8.92316	8.92316	8.92316	8.92316	8.92316
chr10:62433052-62441246-	0	0	0	0	0	0	2	0	0	0	0	0	0	0	0	0	0	0	0	0	0	0	0	0	0	1	0	0	0	0	0	0	0	0	0	0	0	0	0	0	8.92316	8.92316	8.92316	8.92316	8.92316	8.92316	9.90803	8.92316	8.92316
chr10:62437434-62441246-	0	0	1	2	0	0	1	0	0	0	0	0	0	0	0	0	0	0	0	0	0	0	0	0	0	0	0	0	0	0	0	0	0	0	0	0	0	0	1	0	8.92316	8.92316	9.48818	9.88598	8.92316	8.92316	9.49805	8.92316	8.92316
chr10:62569980-62571688-	0	0	0	0	1	0	0	0	0	0	0	0	1	0	0	0	0	3	0	0	0	0	0	0	0	0	0	1	1	0	0	0	0	0	0	0	0	0	0	0	8.92316	8.92316	8.92316	8.92316	9.48822	8.92316	8.92316	8.92316	8.92316
chr10:62616054-62627632-	0	0	0	0	0	0	0	0	0	0	0	0	0	0	0	0	0	0	0	0	2	0	0	0	0	0	0	0	0	0	0	0	0	0	0	0	0	0	0	0	8.92316	8.92316	8.92316	8.92316	8.92316	8.92316	8.92316	8.92316	8.92316
chr10:62621389-62643372-	0	0	0	0	0	0	0	0	0	0	0	0	0	0	0	0	0	0	0	0	0	0	0	0	0	0	0	0	0	0	0	0	0	0	0	0	2	0	0	1	8.92316	8.92316	8.92316	8.92316	8.92316	8.92316	8.92316	8.92316	8.92316
chr10:62633977-62643372-	0	0	0	0	0	0	0	0	0	0	1	1	0	0	0	2	0	3	0	0	0	0	0	1	0	0	0	0	0	0	0	0	0	2	0	0	0	0	0	0	8.92316	8.92316	8.92316	8.92316	8.92316	8.92316	8.92316	8.92316	8.92316
chr10:62639861-62640862-	0	0	0	0	0	0	0	0	0	0	0	0	0	0	0	0	0	0	0	0	0	0	3	0	0	0	0	0	0	0	0	0	0	0	0	0	0	0	0	0	8.92316	8.92316	8.92316	8.92316	8.92316	8.92316	8.92316	8.92316	8.92316
chr10:62639861-62643372-	0	0	0	0	0	0	0	0	0	0	0	0	0	0	0	0	0	0	0	0	0	0	0	0	0	0	0	1	0	0	2	0	0	0	0	0	0	0	0	0	8.92316	8.92316	8.92316	8.92316	8.92316	8.92316	8.92316	8.92316	8.92316
chr10:62745263-62747086-	0	0	0	0	0	0	2	0	0	0	0	0	0	0	0	0	0	0	0	0	0	0	0	0	0	0	0	0	0	0	0	0	0	0	0	0	0	0	0	0	8.92316	8.92316	8.92316	8.92316	8.92316	8.92316	9.90803	8.92316	8.92316
chr10:62746901-62747079-	0	0	0	0	0	0	0	0	0	0	0	0	0	0	0	2	0	0	0	0	0	1	0	0	0	2	0	0	0	0	0	0	0	0	0	0	1	0	0	1	8.92316	8.92316	8.92316	8.92316	8.92316	8.92316	8.92316	8.92316	8.92316
chr10:62763440-62764281-	0	0	0	0	0	0	0	0	0	0	0	0	0	0	0	0	0	2	0	0	0	0	0	0	0	0	0	0	0	0	0	0	0	0	0	0	0	0	0	0	8.92316	8.92316	8.92316	8.92316	8.92316	8.92316	8.92316	8.92316	8.92316
chr10:62763440-62766782-	0	0	0	0	0	0	0	0	0	1	0	0	0	0	0	0	0	0	0	1	1	0	0	0	0	0	0	1	0	0	0	0	0	0	0	0	0	2	0	0	8.92316	8.92316	8.92316	8.92316	8.92316	8.92316	8.92316	8.92316	8.92316
chr10:62770855-62772065-	2	1	0	0	1	0	0	0	1	0	1	1	0	0	0	0	0	1	0	0	0	0	1	1	0	0	0	0	0	0	0	0	0	0	1	0	1	0	4	1	9.7694	9.47834	8.92316	8.92316	9.48822	8.92316	8.92316	8.92316	9.49515
chr10:62776568-62776963-	0	0	0	1	0	0	0	0	0	0	0	0	0	0	3	0	0	0	0	0	0	0	0	0	1	0	0	0	1	0	0	0	1	0	0	0	0	0	0	2	8.92316	8.92316	8.92316	9.48344	8.92316	8.92316	8.92316	8.92316	8.92316
chr10:62776568-62785594-	0	0	0	0	0	0	0	0	0	0	0	0	0	0	0	0	0	0	0	0	0	2	0	0	0	0	0	0	0	0	0	0	0	0	0	0	0	0	0	0	8.92316	8.92316	8.92316	8.92316	8.92316	8.92316	8.92316	8.92316	8.92316
chr10:62780441-62785594-	0	0	0	0	0	1	0	0	0	0	0	0	0	0	0	0	0	0	1	0	0	0	0	0	0	0	0	0	1	0	0	0	0	0	0	0	2	3	0	0	8.92316	8.92316	8.92316	8.92316	8.92316	9.5523	8.92316	8.92316	8.92316
chr10:62780441-62791042-	0	2	0	0	0	0	0	0	0	0	0	0	0	0	0	0	0	2	0	0	0	0	0	0	1	0	0	1	1	0	0	1	0	0	0	0	0	0	0	0	8.92316	9.87826	8.92316	8.92316	8.92316	8.92316	8.92316	8.92316	8.92316
chr10:62783234-62783927-	0	0	0	0	0	0	0	0	0	0	0	0	0	2	0	0	0	0	0	0	0	0	0	0	0	0	2	0	0	0	0	0	0	0	0	0	0	0	0	0	8.92316	8.92316	8.92316	8.92316	8.92316	8.92316	8.92316	8.92316	8.92316
chr10:62813278-62840378-	0	0	0	0	0	0	0	0	0	0	0	0	0	0	0	0	0	0	0	0	0	0	0	0	0	0	2	0	0	2	0	0	0	0	0	0	0	0	0	0	8.92316	8.92316	8.92316	8.92316	8.92316	8.92316	8.92316	8.92316	8.92316
chr10:62832894-62840378-	3	1	0	0	0	0	0	1	0	0	0	0	1	0	3	0	0	0	0	0	0	1	1	0	0	0	0	0	0	0	0	0	0	1	0	1	0	0	0	0	10.0585	9.47834	8.92316	8.92316	8.92316	8.92316	8.92316	9.53126	8.92316
chr10:62994705-63011843+	0	0	0	0	0	0	0	0	0	0	0	0	0	0	0	0	0	2	0	0	0	0	0	0	0	0	0	0	0	0	0	0	0	1	0	0	0	0	0	0	8.92316	8.92316	8.92316	8.92316	8.92316	8.92316	8.92316	8.92316	8.92316
chr10:63015802-63017610-	0	0	0	0	0	0	0	1	0	0	0	0	0	0	0	0	0	0	1	0	0	0	0	0	0	0	0	0	0	0	0	0	0	0	0	2	0	0	0	0	8.92316	8.92316	8.92316	8.92316	8.92316	8.92316	8.92316	9.53126	8.92316
chr10:63015802-63019527-	1	0	0	0	0	0	0	0	1	2	0	0	0	0	0	1	3	2	0	0	0	2	0	0	0	0	0	0	0	0	0	0	0	0	0	0	0	0	0	0	9.40746	8.92316	8.92316	8.92316	8.92316	8.92316	8.92316	8.92316	9.49515
chr10:63017524-63019527-	0	0	0	0	0	1	0	0	0	0	0	0	0	0	0	0	0	0	0	0	0	0	2	0	0	0	0	0	0	1	0	0	0	0	0	0	0	0	0	0	8.92316	8.92316	8.92316	8.92316	8.92316	9.5523	8.92316	8.92316	8.92316
chr10:63264026-63278465+	0	0	0	0	0	0	0	0	0	0	0	0	0	0	0	0	0	0	0	0	0	0	0	0	0	0	0	0	0	0	2	0	1	0	0	0	0	0	0	0	8.92316	8.92316	8.92316	8.92316	8.92316	8.92316	8.92316	8.92316	8.92316
chr10:63264026-63283341+	0	0	0	0	0	0	0	0	0	0	0	0	0	0	0	0	0	0	0	1	0	0	0	2	0	0	0	0	0	0	0	0	0	0	0	0	1	1	0	1	8.92316	8.92316	8.92316	8.92316	8.92316	8.92316	8.92316	8.92316	8.92316
chr10:63264026-63289241+	0	0	0	0	0	0	0	0	0	0	0	0	0	0	0	0	0	0	0	0	0	0	0	0	0	0	0	0	3	0	0	0	0	0	0	0	0	0	0	0	8.92316	8.92316	8.92316	8.92316	8.92316	8.92316	8.92316	8.92316	8.92316
chr10:63269628-63278465+	0	0	0	0	0	0	0	0	0	0	0	0	0	1	0	0	0	0	0	0	1	1	0	0	0	0	0	0	0	0	0	0	0	0	0	0	0	0	3	0	8.92316	8.92316	8.92316	8.92316	8.92316	8.92316	8.92316	8.92316	8.92316
chr10:63269628-63283341+	0	0	0	0	0	0	0	0	0	0	0	0	0	1	0	0	0	0	0	0	0	0	0	2	0	0	0	0	0	0	0	0	0	0	0	0	0	0	0	0	8.92316	8.92316	8.92316	8.92316	8.92316	8.92316	8.92316	8.92316	8.92316
chr10:63285374-63285720+	0	0	0	0	0	0	0	0	0	0	0	0	1	0	0	0	0	0	0	0	0	0	0	0	0	0	0	0	2	0	0	0	0	0	0	0	0	0	0	0	8.92316	8.92316	8.92316	8.92316	8.92316	8.92316	8.92316	8.92316	8.92316
chr10:63287519-63290676+	0	0	0	0	0	0	3	0	0	0	0	0	0	0	0	0	0	0	0	0	0	0	0	0	0	0	0	0	0	0	0	0	0	0	0	0	0	0	0	0	8.92316	8.92316	8.92316	8.92316	8.92316	8.92316	10.2269	8.92316	8.92316
chr10:63289052-63299239+	0	0	0	0	0	0	0	0	0	0	0	3	1	2	0	0	0	0	0	0	1	0	0	0	0	0	0	0	0	0	0	0	1	0	0	0	0	0	0	0	8.92316	8.92316	8.92316	8.92316	8.92316	8.92316	8.92316	8.92316	8.92316
chr10:63289052-63311914+	0	0	0	0	0	0	0	0	0	0	0	0	0	0	0	0	0	0	0	0	0	0	1	0	0	0	0	0	1	1	0	0	0	0	1	0	1	0	2	1	8.92316	8.92316	8.92316	8.92316	8.92316	8.92316	8.92316	8.92316	8.92316
chr10:63306348-63308450+	0	0	0	0	0	0	2	0	0	0	0	0	0	0	0	0	0	0	1	0	0	0	0	0	0	0	0	0	0	0	0	0	0	0	0	0	0	0	0	0	8.92316	8.92316	8.92316	8.92316	8.92316	8.92316	9.90803	8.92316	8.92316
chr10:63306348-63314569+	0	0	0	0	0	0	0	0	0	0	0	0	0	0	0	0	0	0	0	1	0	0	0	0	0	0	0	0	0	0	0	0	0	0	0	0	0	0	2	0	8.92316	8.92316	8.92316	8.92316	8.92316	8.92316	8.92316	8.92316	8.92316
chr10:67034599-67039577-	0	0	2	1	2	0	1	0	1	1	0	1	0	0	0	0	0	0	0	0	0	2	0	3	0	3	1	1	0	0	0	0	0	2	0	0	0	0	0	0	8.92316	8.92316	9.89315	9.48344	9.89321	8.92316	9.49805	8.92316	9.49515
chr10:67157907-67189849+	10	2	2	5	1	2	5	2	6	2	1	1	3	3	2	3	4	3	4	2	11	2	2	5	7	1	2	7	2	5	4	1	1	7	4	5	0	1	1	1	11.2419	9.87826	9.89315	10.6771	9.48822	9.98893	10.7088	9.95773	10.8938
chr10:67157907-67220635+	0	0	0	0	0	0	0	0	0	0	0	0	0	0	0	0	0	0	0	0	0	0	0	0	0	0	0	0	0	0	0	0	2	0	0	0	0	0	0	0	8.92316	8.92316	8.92316	8.92316	8.92316	8.92316	8.92316	8.92316	8.92316
chr10:67157907-67240941+	0	0	0	0	0	0	0	0	0	0	0	0	0	0	0	1	1	0	0	0	0	0	0	0	0	2	0	0	0	0	0	0	0	0	0	0	0	0	0	0	8.92316	8.92316	8.92316	8.92316	8.92316	8.92316	8.92316	8.92316	8.92316
chr10:67189736-67232186+	0	0	0	0	0	0	0	0	0	0	0	0	0	0	0	0	0	0	0	0	0	2	0	0	0	0	0	0	0	0	0	0	0	0	0	0	0	0	0	0	8.92316	8.92316	8.92316	8.92316	8.92316	8.92316	8.92316	8.92316	8.92316
chr10:67194315-67194581+	2	0	0	0	0	0	0	0	0	0	0	0	0	0	0	0	0	0	0	0	0	0	0	0	0	0	0	0	0	0	0	0	0	0	0	0	0	0	0	0	9.7694	8.92316	8.92316	8.92316	8.92316	8.92316	8.92316	8.92316	8.92316
chr10:67224009-67226919+	0	0	0	0	0	0	0	0	2	0	0	0	0	0	0	0	0	0	0	0	0	0	0	0	0	0	0	0	0	0	0	0	0	0	0	0	0	0	0	0	8.92316	8.92316	8.92316	8.92316	8.92316	8.92316	8.92316	8.92316	9.90366
chr10:67225332-67225805+	0	0	0	0	0	0	2	0	0	0	0	0	0	0	0	0	0	0	0	0	0	0	0	0	0	0	0	0	0	0	0	0	0	0	0	0	0	0	0	0	8.92316	8.92316	8.92316	8.92316	8.92316	8.92316	9.90803	8.92316	8.92316
chr10:67229848-67246156+	0	0	0	0	0	0	0	0	0	0	0	0	0	0	0	0	0	2	0	0	0	0	0	0	0	0	0	0	0	0	0	0	0	0	0	0	0	0	0	0	8.92316	8.92316	8.92316	8.92316	8.92316	8.92316	8.92316	8.92316	8.92316
chr10:67249630-67254583+	0	0	0	0	0	0	2	0	0	0	0	0	0	0	0	0	0	0	0	0	0	0	0	0	0	0	0	0	0	0	0	0	0	0	0	0	0	0	0	0	8.92316	8.92316	8.92316	8.92316	8.92316	8.92316	9.90803	8.92316	8.92316
chr10:68017806-68026649+	2	0	0	0	0	0	0	0	0	0	0	0	0	0	0	0	0	0	0	0	0	0	0	0	0	0	0	0	0	0	0	0	0	0	0	0	0	0	0	0	9.7694	8.92316	8.92316	8.92316	8.92316	8.92316	8.92316	8.92316	8.92316
chr10:68186026-68186256-	1	0	1	0	0	0	0	0	0	0	0	0	0	0	0	2	0	0	0	0	2	0	0	0	0	0	0	0	0	0	0	0	0	0	0	0	0	0	0	0	9.40746	8.92316	9.48818	8.92316	8.92316	8.92316	8.92316	8.92316	8.92316
chr10:68186026-68243229-	0	0	2	0	0	0	3	1	0	1	0	0	0	0	0	1	0	3	0	0	1	1	2	0	0	2	1	0	1	0	0	0	0	2	2	2	0	0	2	0	8.92316	8.92316	9.89315	8.92316	8.92316	8.92316	10.2269	9.53126	8.92316
chr10:68224440-68224913-	0	0	0	0	0	0	0	0	0	0	0	0	0	0	0	0	0	0	0	0	0	0	0	0	0	0	2	0	0	0	0	0	0	0	0	0	0	0	0	0	8.92316	8.92316	8.92316	8.92316	8.92316	8.92316	8.92316	8.92316	8.92316
chr10:68224711-68243229-	0	0	0	0	0	0	0	0	0	0	0	0	0	0	0	0	0	0	0	2	0	0	0	0	0	0	0	0	0	0	0	0	0	0	0	0	0	0	0	0	8.92316	8.92316	8.92316	8.92316	8.92316	8.92316	8.92316	8.92316	8.92316
chr10:68243004-68243229-	0	0	0	0	0	0	2	0	0	0	0	1	0	1	0	0	0	0	0	0	0	0	0	0	0	0	0	0	0	0	0	0	0	0	0	0	0	0	0	0	8.92316	8.92316	8.92316	8.92316	8.92316	8.92316	9.90803	8.92316	8.92316
chr10:68748376-68751328+	0	1	0	0	0	0	0	0	0	0	0	0	1	0	0	0	0	0	0	0	0	0	0	0	2	1	0	1	0	0	0	0	0	0	0	0	0	0	0	0	8.92316	9.47834	8.92316	8.92316	8.92316	8.92316	8.92316	8.92316	8.92316
chr10:69346309-69347753-	0	0	0	0	0	0	0	0	0	0	0	0	0	0	0	0	0	0	0	0	0	0	0	0	0	0	0	0	0	0	0	0	0	0	0	0	2	0	0	0	8.92316	8.92316	8.92316	8.92316	8.92316	8.92316	8.92316	8.92316	8.92316
chr10:69994372-69999498+	0	2	0	0	0	0	0	0	0	0	0	0	0	0	0	0	0	0	0	0	0	0	0	0	0	0	0	0	0	0	0	0	0	0	0	0	0	0	0	0	8.92316	9.87826	8.92316	8.92316	8.92316	8.92316	8.92316	8.92316	8.92316
chr10:70142579-70154836+	6	2	0	0	0	1	1	0	3	0	0	0	0	0	0	0	1	0	0	1	0	1	1	0	1	0	2	0	0	0	1	0	0	3	0	3	0	0	2	0	10.6859	9.87826	8.92316	8.92316	8.92316	9.5523	9.49805	8.92316	10.2217
chr10:70142579-70169252+	0	0	0	0	0	0	0	0	0	0	0	0	0	1	0	0	0	0	0	0	0	1	0	0	0	2	0	0	0	0	0	0	0	0	0	0	0	0	0	0	8.92316	8.92316	8.92316	8.92316	8.92316	8.92316	8.92316	8.92316	8.92316
chr10:70170850-70171335+	0	0	0	0	0	0	0	0	0	0	0	0	0	0	0	0	0	0	0	0	3	0	0	0	0	0	0	0	0	0	0	0	0	0	0	0	0	0	0	0	8.92316	8.92316	8.92316	8.92316	8.92316	8.92316	8.92316	8.92316	8.92316
chr10:70282289-70285034+	0	0	0	0	0	0	2	0	0	0	0	0	0	0	0	0	0	0	0	0	0	0	0	0	0	0	0	0	0	0	0	0	0	0	0	0	0	0	0	0	8.92316	8.92316	8.92316	8.92316	8.92316	8.92316	9.90803	8.92316	8.92316
chr10:71229087-71237031-	0	0	0	0	1	0	0	0	0	0	0	0	0	0	0	0	0	0	0	0	0	0	0	0	0	0	0	0	0	0	0	0	0	0	0	0	4	0	2	1	8.92316	8.92316	8.92316	8.92316	9.48822	8.92316	8.92316	8.92316	8.92316
chr10:71258201-71262262-	2	0	0	0	0	0	0	0	0	0	0	0	0	0	0	0	0	0	0	0	0	0	0	0	0	0	0	0	0	0	0	0	0	0	0	0	0	0	0	0	9.7694	8.92316	8.92316	8.92316	8.92316	8.92316	8.92316	8.92316	8.92316
chr10:71363450-71381760+	0	0	0	0	0	0	0	0	0	0	0	1	0	0	0	0	0	0	0	0	0	0	0	0	1	0	0	1	0	1	0	0	0	0	0	0	1	0	0	2	8.92316	8.92316	8.92316	8.92316	8.92316	8.92316	8.92316	8.92316	8.92316
chr10:71382930-71384834+	2	0	0	0	0	0	0	0	0	0	0	0	0	0	0	0	0	0	0	0	0	0	0	0	0	0	0	0	0	0	0	0	0	0	0	0	0	0	0	0	9.7694	8.92316	8.92316	8.92316	8.92316	8.92316	8.92316	8.92316	8.92316
chr10:75061515-75125193+	0	0	0	0	0	0	0	0	0	0	0	3	0	0	0	0	0	0	0	0	0	0	0	0	0	0	0	0	0	0	0	0	0	0	0	0	0	0	0	0	8.92316	8.92316	8.92316	8.92316	8.92316	8.92316	8.92316	8.92316	8.92316
chr10:75131021-75145462+	0	0	0	0	0	1	0	0	0	0	0	0	0	0	0	0	0	0	0	0	0	0	0	0	0	0	0	0	0	0	0	0	0	0	0	0	0	0	4	0	8.92316	8.92316	8.92316	8.92316	8.92316	9.5523	8.92316	8.92316	8.92316
chr10:75230682-75248644+	0	0	0	0	0	0	0	0	0	1	0	0	0	0	0	1	0	0	0	0	0	0	0	2	2	0	0	0	0	0	0	0	0	0	0	0	0	0	0	0	8.92316	8.92316	8.92316	8.92316	8.92316	8.92316	8.92316	8.92316	8.92316
chr10:75241065-75248644+	0	0	0	0	0	0	2	0	0	0	1	0	0	0	0	0	0	0	0	0	0	0	0	0	0	0	0	0	0	0	0	0	0	0	0	0	0	0	0	0	8.92316	8.92316	8.92316	8.92316	8.92316	8.92316	9.90803	8.92316	8.92316
chr10:75245079-75261957+	0	0	1	0	0	0	0	0	0	0	0	0	0	0	0	0	2	0	0	0	0	0	0	0	0	0	0	0	0	0	0	0	0	0	0	0	0	0	0	0	8.92316	8.92316	9.48818	8.92316	8.92316	8.92316	8.92316	8.92316	8.92316
chr10:75248437-75267589+	0	2	0	0	0	0	0	0	0	0	0	0	0	0	0	0	0	0	0	0	0	0	0	0	0	0	0	0	0	0	0	0	0	0	0	0	0	0	0	0	8.92316	9.87826	8.92316	8.92316	8.92316	8.92316	8.92316	8.92316	8.92316
chr10:75257868-75267589+	0	0	1	0	0	2	0	0	0	2	0	0	0	0	0	0	0	0	0	0	1	1	1	0	0	0	3	0	0	1	0	0	0	0	0	0	0	0	0	0	8.92316	8.92316	9.48818	8.92316	8.92316	9.98893	8.92316	8.92316	8.92316
chr10:75257868-75267595+	0	0	0	0	0	0	0	0	0	0	0	0	0	0	0	0	0	0	0	0	0	0	0	0	5	0	0	0	0	0	0	0	0	0	0	0	0	0	0	0	8.92316	8.92316	8.92316	8.92316	8.92316	8.92316	8.92316	8.92316	8.92316
chr10:75257868-75279961+	0	0	0	0	0	0	0	0	0	0	0	0	0	0	0	0	0	0	0	0	0	0	1	0	0	0	0	0	0	0	0	0	0	0	0	0	0	0	0	2	8.92316	8.92316	8.92316	8.92316	8.92316	8.92316	8.92316	8.92316	8.92316
chr10:75261794-75267589+	0	0	0	0	0	0	0	0	0	0	0	0	0	0	0	0	0	0	0	0	0	0	0	0	0	0	0	0	0	0	0	0	0	0	0	2	0	0	0	0	8.92316	8.92316	8.92316	8.92316	8.92316	8.92316	8.92316	8.92316	8.92316
chr10:75261794-75276927+	0	1	0	0	0	0	0	0	0	0	0	0	0	0	0	0	0	0	0	0	0	0	0	0	2	0	0	0	0	0	0	0	0	0	0	0	0	0	0	0	8.92316	9.47834	8.92316	8.92316	8.92316	8.92316	8.92316	8.92316	8.92316
chr10:75263279-75279961+	0	0	1	0	0	0	0	0	0	0	0	0	0	0	0	0	0	0	0	0	0	2	0	0	0	0	0	0	0	0	0	0	0	0	0	0	0	0	0	0	8.92316	8.92316	9.48818	8.92316	8.92316	8.92316	8.92316	8.92316	8.92316
chr10:75274017-75279961+	6	7	4	4	1	3	0	1	5	1	3	2	5	6	3	0	0	2	1	1	7	5	3	4	4	2	0	0	1	2	2	0	4	4	1	0	2	1	8	2	10.6859	11.0226	10.468	10.4583	9.48822	10.3237	8.92316	9.53126	10.7026
chr10:75649489-75651069-	0	0	0	0	0	0	0	0	0	0	0	0	0	0	0	0	0	0	0	0	0	0	0	0	0	0	0	0	0	0	0	0	0	0	0	2	0	0	0	0	8.92316	8.92316	8.92316	8.92316	8.92316	8.92316	8.92316	8.92316	8.92316
chr10:75684292-75700095-	0	1	3	2	2	1	2	0	0	0	0	0	5	0	0	0	0	3	0	0	1	4	0	0	0	1	0	2	1	0	0	0	0	0	1	1	0	0	0	0	8.92316	9.47834	10.209	9.88598	9.89321	9.5523	9.90803	8.92316	8.92316
chr10:75910154-75916911-	0	0	0	0	0	0	0	0	0	0	0	0	0	0	0	0	0	2	0	0	0	0	0	0	0	0	0	0	0	0	0	0	0	0	0	0	0	0	0	0	8.92316	8.92316	8.92316	8.92316	8.92316	8.92316	8.92316	8.92316	8.92316
chr10:75915064-75916911-	0	0	0	0	0	0	0	0	0	0	0	0	0	0	0	0	0	0	2	0	0	0	0	0	0	0	0	0	0	0	0	0	0	0	0	0	0	0	0	0	8.92316	8.92316	8.92316	8.92316	8.92316	8.92316	8.92316	8.92316	8.92316
chr10:76225288-76226315-	1	0	0	0	0	0	0	0	0	0	0	0	0	0	0	0	0	2	0	0	0	3	1	0	0	0	0	0	0	0	0	0	0	0	0	0	0	0	0	0	9.40746	8.92316	8.92316	8.92316	8.92316	8.92316	8.92316	8.92316	8.92316
chr10:76367308-76370079-	0	0	0	1	0	1	2	0	0	0	0	0	0	1	1	0	0	0	0	0	0	0	0	0	0	0	0	0	0	0	2	1	2	0	0	0	0	0	0	0	8.92316	8.92316	8.92316	9.48344	8.92316	9.5523	9.90803	8.92316	8.92316
chr10:76511020-76512568+	1	1	0	0	0	0	0	0	0	0	2	1	0	1	0	0	0	0	0	0	0	0	0	0	0	0	0	0	0	0	0	0	0	0	0	0	0	0	1	0	9.40746	9.47834	8.92316	8.92316	8.92316	8.92316	8.92316	8.92316	8.92316
chr10:76714995-76716323-	0	0	2	0	0	0	0	0	0	0	0	0	0	0	0	0	0	0	0	0	0	0	0	0	0	0	0	0	0	0	0	0	0	0	0	0	0	0	0	0	8.92316	8.92316	9.89315	8.92316	8.92316	8.92316	8.92316	8.92316	8.92316
chr10:76781832-76825992-	0	0	0	0	0	0	0	0	0	0	2	0	0	0	0	0	0	0	0	0	0	0	0	0	0	0	0	0	0	0	0	0	0	0	0	0	0	0	0	0	8.92316	8.92316	8.92316	8.92316	8.92316	8.92316	8.92316	8.92316	8.92316
chr10:77627406-77631827+	0	0	0	0	0	0	0	0	0	0	0	0	0	0	0	0	0	0	0	0	0	0	1	0	0	0	1	0	0	0	0	0	0	0	2	0	0	0	0	0	8.92316	8.92316	8.92316	8.92316	8.92316	8.92316	8.92316	8.92316	8.92316
chr10:77630726-77630894+	0	0	0	0	0	1	3	1	2	2	0	0	0	3	2	2	1	4	0	0	1	1	2	0	1	2	0	0	4	0	0	2	0	2	0	1	0	0	0	0	8.92316	8.92316	8.92316	8.92316	8.92316	9.5523	10.2269	9.53126	9.90366
chr10:77990142-77991416-	0	0	0	0	0	0	2	0	0	0	0	0	0	0	0	0	0	0	0	0	0	0	0	0	0	0	0	0	0	0	0	0	0	0	0	0	0	0	0	0	8.92316	8.92316	8.92316	8.92316	8.92316	8.92316	9.90803	8.92316	8.92316
chr10:78188439-78188828-	0	0	0	0	0	0	0	0	0	0	0	0	0	0	0	0	0	0	0	0	0	0	0	0	0	2	0	0	0	0	0	0	0	0	0	0	0	0	0	0	8.92316	8.92316	8.92316	8.92316	8.92316	8.92316	8.92316	8.92316	8.92316
chr10:78189228-78189382-	0	0	0	0	0	0	0	0	0	0	0	0	0	0	0	0	0	0	0	0	0	2	0	0	0	0	0	0	0	0	0	0	0	0	0	0	0	0	0	0	8.92316	8.92316	8.92316	8.92316	8.92316	8.92316	8.92316	8.92316	8.92316
chr10:78271924-78272315-	0	0	0	0	0	0	0	0	0	0	0	0	0	0	0	0	0	1	0	0	0	2	0	0	0	0	0	0	0	0	0	0	0	0	0	0	0	0	0	0	8.92316	8.92316	8.92316	8.92316	8.92316	8.92316	8.92316	8.92316	8.92316
chr10:78278010-78282476-	0	0	0	0	0	0	0	0	0	0	0	0	0	0	0	0	0	0	0	0	0	0	0	0	0	0	0	0	0	0	0	0	0	0	0	0	0	0	2	0	8.92316	8.92316	8.92316	8.92316	8.92316	8.92316	8.92316	8.92316	8.92316
chr10:79067536-79067709-	0	0	0	0	0	0	0	0	0	0	0	0	0	0	0	0	0	0	0	0	0	0	0	0	0	4	0	0	0	0	0	0	0	0	0	0	0	0	0	0	8.92316	8.92316	8.92316	8.92316	8.92316	8.92316	8.92316	8.92316	8.92316
chr10:79079192-79079483-	0	0	0	0	0	0	1	0	0	2	0	0	0	0	0	0	0	0	0	0	0	0	0	0	0	0	0	0	0	0	0	0	0	0	0	0	0	0	0	0	8.92316	8.92316	8.92316	8.92316	8.92316	8.92316	9.49805	8.92316	8.92316
chr10:79670786-79671057+	0	0	0	0	0	0	0	0	0	0	0	0	0	0	0	0	0	0	0	0	0	0	0	0	0	0	0	0	2	0	0	0	0	0	0	0	0	0	0	0	8.92316	8.92316	8.92316	8.92316	8.92316	8.92316	8.92316	8.92316	8.92316
chr10:79759333-79759527-	0	0	0	0	0	0	0	0	0	0	1	1	0	2	0	0	0	0	0	0	0	0	0	0	0	0	0	0	0	0	0	0	0	0	0	0	0	0	0	0	8.92316	8.92316	8.92316	8.92316	8.92316	8.92316	8.92316	8.92316	8.92316
chr10:79827246-79827924+	2	0	0	0	0	0	0	0	0	0	0	0	0	0	0	0	0	0	0	0	0	0	0	0	0	0	0	0	0	0	0	0	0	0	0	0	0	0	0	0	9.7694	8.92316	8.92316	8.92316	8.92316	8.92316	8.92316	8.92316	8.92316
chr10:79910715-79911053-	0	0	0	0	0	0	0	0	0	0	0	0	3	0	0	0	0	0	0	0	0	0	0	0	0	0	0	0	0	0	0	0	0	0	0	0	0	0	0	0	8.92316	8.92316	8.92316	8.92316	8.92316	8.92316	8.92316	8.92316	8.92316
chr10:79992273-79993574+	0	0	0	0	0	0	0	0	0	0	0	0	0	0	0	0	0	0	0	0	0	0	0	0	0	0	2	0	0	0	0	0	0	0	0	0	0	0	0	0	8.92316	8.92316	8.92316	8.92316	8.92316	8.92316	8.92316	8.92316	8.92316
chr10:80068685-80068920-	0	0	0	0	0	0	0	0	0	0	0	0	0	0	0	0	0	0	0	0	0	0	0	0	0	0	1	0	0	0	0	0	0	0	0	0	0	0	2	0	8.92316	8.92316	8.92316	8.92316	8.92316	8.92316	8.92316	8.92316	8.92316
chr10:80068685-80069431-	0	0	0	0	0	0	0	0	0	0	0	2	0	0	0	0	0	0	0	0	0	0	0	0	0	0	0	0	0	0	0	0	0	0	0	0	0	0	0	0	8.92316	8.92316	8.92316	8.92316	8.92316	8.92316	8.92316	8.92316	8.92316
chr10:80096179-80101404-	0	0	0	0	0	0	0	0	0	0	0	2	0	0	0	0	0	0	0	0	0	0	0	0	0	0	0	0	0	0	0	0	0	0	0	0	0	0	0	0	8.92316	8.92316	8.92316	8.92316	8.92316	8.92316	8.92316	8.92316	8.92316
chr10:80101796-80101974-	0	0	0	0	0	0	0	2	0	0	0	0	0	0	0	0	0	0	0	0	0	0	0	0	0	0	0	0	0	0	0	0	0	0	0	0	0	0	0	0	8.92316	8.92316	8.92316	8.92316	8.92316	8.92316	8.92316	9.95773	8.92316
chr10:80116567-80116721+	0	0	0	0	0	0	0	0	0	0	0	3	0	0	0	0	0	0	0	0	0	0	0	0	0	0	0	0	0	0	0	0	0	0	0	0	0	0	0	0	8.92316	8.92316	8.92316	8.92316	8.92316	8.92316	8.92316	8.92316	8.92316
chr10:80145219-80155406+	0	0	0	0	0	0	0	0	0	0	0	0	0	0	0	0	2	0	0	0	0	0	0	0	0	0	0	0	0	0	0	0	0	0	0	0	0	0	0	0	8.92316	8.92316	8.92316	8.92316	8.92316	8.92316	8.92316	8.92316	8.92316
chr10:80170202-80170764+	0	0	0	0	0	0	0	2	0	0	0	0	0	0	0	0	0	0	0	0	0	0	0	0	0	0	0	0	0	0	0	0	0	0	0	0	0	0	0	0	8.92316	8.92316	8.92316	8.92316	8.92316	8.92316	8.92316	9.95773	8.92316
chr10:80568736-80569145-	0	0	0	0	0	0	0	0	0	0	0	2	0	0	0	0	0	0	0	0	0	0	0	0	0	0	0	0	0	0	0	0	0	0	0	0	0	0	0	0	8.92316	8.92316	8.92316	8.92316	8.92316	8.92316	8.92316	8.92316	8.92316
chr10:80583677-80586745-	0	0	0	0	0	0	0	0	0	0	0	0	0	0	0	0	0	0	0	0	0	0	0	3	0	0	0	0	0	0	0	0	0	0	0	0	0	0	0	0	8.92316	8.92316	8.92316	8.92316	8.92316	8.92316	8.92316	8.92316	8.92316
chr10:80712112-80715179-	2	1	2	1	2	0	1	2	1	0	0	0	0	3	0	0	0	3	3	1	3	0	0	1	1	1	3	2	1	0	0	1	0	0	0	1	1	2	2	0	9.7694	9.47834	9.89315	9.48344	9.89321	8.92316	9.49805	9.95773	9.49515
chr10:80712112-80719812-	0	1	2	4	1	1	0	0	1	0	0	0	1	0	0	4	1	1	0	0	1	0	0	0	1	0	0	0	0	0	3	1	0	0	0	0	0	0	1	0	8.92316	9.47834	9.89315	10.4583	9.48822	9.5523	8.92316	8.92316	9.49515
chr10:80764602-80771366+	0	0	0	0	1	0	0	0	0	0	0	2	0	0	0	0	0	0	0	0	0	0	0	0	0	0	0	0	0	0	1	0	0	0	0	0	0	0	0	0	8.92316	8.92316	8.92316	8.92316	9.48822	8.92316	8.92316	8.92316	8.92316
chr10:80766163-80771366+	0	0	0	0	0	0	0	2	1	0	0	0	0	0	0	0	0	0	0	1	0	0	0	1	0	0	2	0	0	1	0	0	1	0	0	0	1	0	0	0	8.92316	8.92316	8.92316	8.92316	8.92316	8.92316	8.92316	9.95773	9.49515
chr10:80778263-80787150+	0	0	0	0	0	0	0	0	0	0	0	0	0	2	0	0	0	0	0	0	0	0	1	0	0	0	0	0	0	0	0	0	0	0	0	0	0	0	0	0	8.92316	8.92316	8.92316	8.92316	8.92316	8.92316	8.92316	8.92316	8.92316
chr10:80803583-80803888+	2	0	0	0	0	0	0	0	0	0	0	0	0	0	0	0	1	0	0	0	0	0	0	0	0	0	0	0	0	0	0	0	0	0	0	0	0	0	0	0	9.7694	8.92316	8.92316	8.92316	8.92316	8.92316	8.92316	8.92316	8.92316
chr10:81044761-81046312-	0	0	0	0	0	0	0	0	0	0	0	0	0	0	0	0	0	0	0	0	0	0	0	0	0	0	0	0	0	0	0	0	0	0	0	0	0	0	0	2	8.92316	8.92316	8.92316	8.92316	8.92316	8.92316	8.92316	8.92316	8.92316
chr10:81108748-81118229+	0	0	0	0	0	0	0	0	0	0	0	0	2	0	0	0	0	0	0	0	0	0	0	0	0	0	0	0	0	0	0	0	0	0	1	2	0	0	0	0	8.92316	8.92316	8.92316	8.92316	8.92316	8.92316	8.92316	8.92316	8.92316
chr10:81110638-81110818+	0	0	0	0	0	0	0	0	0	0	0	2	0	0	0	0	0	0	0	0	0	0	0	0	0	0	0	0	0	0	0	0	0	0	0	0	0	0	0	0	8.92316	8.92316	8.92316	8.92316	8.92316	8.92316	8.92316	8.92316	8.92316
chr10:81182299-81182479+	2	0	0	0	0	0	0	0	0	0	0	0	0	0	0	0	0	0	0	0	0	0	0	0	0	0	0	0	0	0	0	0	0	0	0	0	0	0	0	0	9.7694	8.92316	8.92316	8.92316	8.92316	8.92316	8.92316	8.92316	8.92316
chr10:81507928-81509415-	2	0	0	0	0	0	0	0	0	0	0	0	0	0	0	0	0	0	0	0	0	0	0	0	0	0	0	0	0	0	0	0	0	0	0	0	0	0	0	0	9.7694	8.92316	8.92316	8.92316	8.92316	8.92316	8.92316	8.92316	8.92316
chr10:81532396-81533406-	0	0	2	0	0	0	0	0	0	0	3	2	0	1	0	0	0	0	0	0	0	0	0	0	0	0	0	0	1	0	0	0	0	1	0	0	0	0	0	0	8.92316	8.92316	9.89315	8.92316	8.92316	8.92316	8.92316	8.92316	8.92316
chr10:82638701-82642090+	2	0	0	0	0	0	0	0	0	0	0	1	0	0	0	0	0	1	0	0	0	0	1	0	0	0	0	0	0	2	0	0	0	0	0	0	0	0	0	0	9.7694	8.92316	8.92316	8.92316	8.92316	8.92316	8.92316	8.92316	8.92316
chr10:82641316-82642090+	0	0	0	1	0	0	0	0	0	0	0	0	0	0	0	0	0	0	0	0	1	0	1	0	0	0	0	0	0	0	0	0	0	0	0	0	0	2	0	0	8.92316	8.92316	8.92316	9.48344	8.92316	8.92316	8.92316	8.92316	8.92316
chr10:82709009-82728427+	0	0	2	0	0	0	0	0	0	0	0	0	0	0	0	0	0	0	0	0	0	0	0	0	0	0	0	0	0	0	0	0	0	0	0	0	0	0	0	0	8.92316	8.92316	9.89315	8.92316	8.92316	8.92316	8.92316	8.92316	8.92316
chr10:82728253-82739265+	1	0	0	0	0	0	0	0	0	0	0	0	0	0	0	0	0	0	0	0	0	4	1	0	0	0	0	0	0	0	0	0	0	0	0	0	0	0	0	0	9.40746	8.92316	8.92316	8.92316	8.92316	8.92316	8.92316	8.92316	8.92316
chr10:82750205-82761913-	0	0	0	0	0	0	0	0	0	0	0	0	0	0	0	0	0	0	2	0	0	0	0	0	0	0	0	0	0	0	0	0	0	0	0	0	0	0	0	0	8.92316	8.92316	8.92316	8.92316	8.92316	8.92316	8.92316	8.92316	8.92316
chr10:82753808-82754104-	0	0	0	0	0	0	0	0	0	0	0	0	0	0	0	0	0	2	0	0	0	0	0	0	0	0	0	0	0	0	0	0	0	0	0	1	0	0	0	0	8.92316	8.92316	8.92316	8.92316	8.92316	8.92316	8.92316	8.92316	8.92316
chr10:83281370-83283869-	0	0	0	0	0	0	0	0	0	0	0	0	2	0	0	0	0	0	0	0	0	0	0	0	0	0	0	0	0	0	0	0	0	0	0	0	0	0	0	0	8.92316	8.92316	8.92316	8.92316	8.92316	8.92316	8.92316	8.92316	8.92316
chr10:83281370-83304375-	0	0	0	0	0	0	2	0	1	0	0	0	0	0	0	0	0	0	0	1	0	0	0	0	0	0	1	0	0	0	0	2	0	0	0	1	1	1	0	0	8.92316	8.92316	8.92316	8.92316	8.92316	8.92316	9.90803	8.92316	9.49515
chr10:83313415-83316789-	0	0	0	0	0	0	0	0	0	0	0	0	0	0	0	0	0	0	0	0	0	0	1	0	0	0	0	0	0	0	0	0	0	0	0	0	0	0	2	0	8.92316	8.92316	8.92316	8.92316	8.92316	8.92316	8.92316	8.92316	8.92316
chr10:83367594-83367865+	0	0	0	0	0	0	0	0	0	0	0	0	0	0	0	0	0	0	0	0	2	0	0	0	0	0	0	0	0	0	0	0	0	0	0	0	0	0	0	0	8.92316	8.92316	8.92316	8.92316	8.92316	8.92316	8.92316	8.92316	8.92316
chr10:83558598-83564537+	0	0	0	0	0	0	3	0	0	0	0	0	0	0	0	0	0	0	0	0	0	0	0	0	0	0	0	1	0	0	0	0	0	0	0	0	1	0	0	0	8.92316	8.92316	8.92316	8.92316	8.92316	8.92316	10.2269	8.92316	8.92316
chr10:83569968-83574559+	0	0	0	0	0	1	0	0	0	0	0	0	0	0	0	0	0	0	0	0	0	0	0	0	0	0	0	0	0	0	0	0	0	0	0	0	2	0	0	1	8.92316	8.92316	8.92316	8.92316	8.92316	9.5523	8.92316	8.92316	8.92316
chr10:84409616-84417807-	0	0	0	0	0	0	0	0	0	0	0	0	0	0	0	0	0	3	0	0	0	0	0	0	0	0	0	0	0	0	0	0	0	0	0	0	0	0	0	0	8.92316	8.92316	8.92316	8.92316	8.92316	8.92316	8.92316	8.92316	8.92316
chr10:84667322-84680464+	0	0	0	0	0	0	0	0	0	0	0	0	0	0	0	0	0	0	0	0	0	0	0	0	2	0	0	0	0	0	0	0	0	0	0	0	0	0	0	0	8.92316	8.92316	8.92316	8.92316	8.92316	8.92316	8.92316	8.92316	8.92316
chr10:84667322-84699541+	0	1	1	0	0	0	0	0	0	0	0	0	0	0	0	0	0	0	0	0	0	0	0	0	0	0	0	0	0	0	2	0	1	0	0	0	0	0	0	0	8.92316	9.47834	9.48818	8.92316	8.92316	8.92316	8.92316	8.92316	8.92316
chr10:84674557-84680464+	0	0	0	0	0	0	0	0	0	0	0	0	0	0	0	0	0	0	0	0	0	0	0	0	0	0	0	0	0	0	3	0	2	0	0	0	0	0	0	0	8.92316	8.92316	8.92316	8.92316	8.92316	8.92316	8.92316	8.92316	8.92316
chr10:84680366-84720517+	0	0	0	0	0	0	0	0	0	0	0	0	0	0	0	0	0	0	0	0	0	0	0	0	0	0	0	0	0	0	0	0	0	2	0	0	0	0	0	0	8.92316	8.92316	8.92316	8.92316	8.92316	8.92316	8.92316	8.92316	8.92316
chr10:84947412-84948020+	0	2	1	1	2	1	0	0	1	0	0	0	3	2	0	0	1	2	0	0	0	0	0	1	0	2	0	0	2	3	1	2	2	0	0	2	1	1	0	0	8.92316	9.87826	9.48818	9.48344	9.89321	9.5523	8.92316	8.92316	9.49515
chr10:85143016-85147995-	0	0	0	0	0	0	2	0	0	0	0	0	0	0	0	0	0	0	0	0	0	0	0	0	0	0	0	0	0	0	0	0	0	0	0	0	0	0	0	0	8.92316	8.92316	8.92316	8.92316	8.92316	8.92316	9.90803	8.92316	8.92316
chr10:85143016-85157194-	0	0	0	0	0	1	0	0	0	0	0	0	0	0	0	0	0	2	0	0	0	0	0	0	0	0	0	0	0	0	0	0	0	0	0	1	0	0	0	0	8.92316	8.92316	8.92316	8.92316	8.92316	9.5523	8.92316	8.92316	8.92316
chr10:85888978-85889207+	0	0	0	0	0	0	0	0	0	0	0	0	0	0	0	0	0	0	0	0	2	0	0	0	0	0	0	0	0	0	0	0	0	0	0	0	0	0	0	0	8.92316	8.92316	8.92316	8.92316	8.92316	8.92316	8.92316	8.92316	8.92316
chr10:85899175-85905498-	0	2	0	0	1	0	0	0	0	0	0	0	0	0	0	0	0	0	0	0	0	0	0	0	0	0	0	0	0	0	0	0	0	0	0	0	0	0	0	0	8.92316	9.87826	8.92316	8.92316	9.48822	8.92316	8.92316	8.92316	8.92316
chr10:86031473-86032212+	0	0	0	0	0	0	0	0	0	0	0	0	0	0	0	0	0	0	0	0	0	0	0	0	0	0	2	0	0	1	0	0	0	0	0	0	0	0	0	0	8.92316	8.92316	8.92316	8.92316	8.92316	8.92316	8.92316	8.92316	8.92316
chr10:86345911-86346062+	1	1	0	0	0	0	0	0	0	0	1	2	0	0	0	0	1	0	0	1	0	0	0	0	0	0	0	0	0	0	0	0	1	0	2	0	0	0	0	0	9.40746	9.47834	8.92316	8.92316	8.92316	8.92316	8.92316	8.92316	8.92316
chr10:86348232-86348878+	0	0	0	0	0	0	0	0	0	0	0	0	0	0	0	0	0	0	0	0	0	0	0	0	0	0	0	0	0	0	0	0	0	0	0	0	0	0	4	0	8.92316	8.92316	8.92316	8.92316	8.92316	8.92316	8.92316	8.92316	8.92316
chr10:86712765-86736999+	0	0	0	0	0	0	0	0	0	0	0	0	0	0	0	0	0	0	0	0	0	0	0	0	0	0	0	0	0	0	0	0	0	0	0	0	1	0	0	2	8.92316	8.92316	8.92316	8.92316	8.92316	8.92316	8.92316	8.92316	8.92316
chr10:88110299-88114701-	0	0	0	0	0	0	0	0	1	1	0	0	0	0	0	0	2	0	0	0	0	0	0	0	0	0	0	0	0	0	0	1	0	0	0	0	0	0	0	0	8.92316	8.92316	8.92316	8.92316	8.92316	8.92316	8.92316	8.92316	9.49515
chr10:88110299-88126327-	1	3	0	1	0	0	0	0	1	0	0	0	0	0	0	0	0	0	0	0	0	0	0	0	0	1	0	2	0	0	1	1	0	0	0	0	0	0	0	3	9.40746	10.191	8.92316	9.48344	8.92316	8.92316	8.92316	8.92316	9.49515
chr10:88400652-88414598+	2	0	0	0	0	0	0	3	0	1	0	0	0	0	0	1	0	0	0	0	1	0	1	1	1	0	0	0	1	0	2	3	2	2	0	1	0	1	0	0	9.7694	8.92316	8.92316	8.92316	8.92316	8.92316	8.92316	10.2865	8.92316
chr10:88400652-88419560+	0	0	0	2	0	0	0	1	0	0	0	0	0	0	0	0	0	1	0	0	0	0	0	0	0	0	0	0	1	0	0	0	0	2	0	0	0	0	2	1	8.92316	8.92316	8.92316	9.88598	8.92316	8.92316	8.92316	9.53126	8.92316
chr10:88411916-88419560+	0	0	0	0	0	1	1	0	0	3	1	1	0	0	0	1	2	0	0	0	0	0	0	0	0	0	0	0	0	0	0	0	0	2	0	0	0	0	0	0	8.92316	8.92316	8.92316	8.92316	8.92316	9.5523	9.49805	8.92316	8.92316
chr10:88733543-88737202+	0	0	0	0	2	0	2	1	0	1	0	0	0	1	0	0	0	0	0	1	2	0	0	1	0	0	4	0	0	0	0	0	0	1	0	0	0	0	1	0	8.92316	8.92316	8.92316	8.92316	9.89321	8.92316	9.90803	9.53126	8.92316
chr10:88735898-88737202+	0	0	0	0	2	0	1	0	0	0	0	0	0	0	0	0	2	0	0	0	0	0	0	1	1	0	0	0	0	0	0	0	0	0	0	0	0	1	0	0	8.92316	8.92316	8.92316	8.92316	9.89321	8.92316	9.49805	8.92316	8.92316
chr10:88743023-88743242+	0	0	0	0	0	0	0	0	0	0	0	0	0	0	0	0	0	0	0	0	0	0	0	0	0	0	0	0	0	0	1	0	0	0	0	0	2	0	0	0	8.92316	8.92316	8.92316	8.92316	8.92316	8.92316	8.92316	8.92316	8.92316
chr10:88760870-88767592-	0	0	0	0	0	0	0	2	0	1	0	0	0	0	0	0	0	0	0	0	0	0	0	0	0	0	2	0	0	0	0	0	0	0	0	0	0	0	0	0	8.92316	8.92316	8.92316	8.92316	8.92316	8.92316	8.92316	9.95773	8.92316
chr10:88809082-88810085-	6	1	1	2	5	1	3	2	1	1	0	2	1	0	0	3	2	1	0	1	1	0	1	0	0	1	0	0	0	1	0	0	0	1	1	0	1	3	1	0	10.6859	9.47834	9.48818	9.88598	10.6875	9.5523	10.2269	9.95773	9.49515
chr10:88819268-88825498-	0	0	0	0	0	2	0	0	0	1	0	0	0	0	0	0	0	0	0	0	0	0	0	0	0	0	0	0	0	0	0	0	0	0	0	0	0	0	0	0	8.92316	8.92316	8.92316	8.92316	8.92316	9.98893	8.92316	8.92316	8.92316
chr10:88886101-88886354+	0	0	0	0	0	2	0	0	0	0	0	0	0	0	0	0	0	0	0	0	0	0	0	0	0	0	0	0	0	0	0	0	0	0	0	0	0	0	0	0	8.92316	8.92316	8.92316	8.92316	8.92316	9.98893	8.92316	8.92316	8.92316
chr10:88892024-88911419+	0	0	2	2	0	0	0	0	0	0	0	0	0	0	0	0	0	0	0	0	0	2	0	0	0	0	0	1	0	0	0	0	1	0	0	0	0	0	0	0	8.92316	8.92316	9.89315	9.88598	8.92316	8.92316	8.92316	8.92316	8.92316
chr10:88892024-88921779+	0	3	0	0	1	0	0	0	0	0	0	0	0	0	0	0	0	0	0	0	0	0	0	0	0	0	0	0	0	0	0	0	0	0	0	0	0	0	2	0	8.92316	10.191	8.92316	8.92316	9.48822	8.92316	8.92316	8.92316	8.92316
chr10:88892653-88892806+	0	2	0	0	0	0	0	0	0	0	0	0	0	0	0	0	0	0	0	0	0	0	0	0	0	0	0	0	0	0	0	0	0	0	0	0	0	0	0	0	8.92316	9.87826	8.92316	8.92316	8.92316	8.92316	8.92316	8.92316	8.92316
chr10:88904917-88911419+	0	0	0	0	0	0	0	0	0	0	0	0	0	0	0	0	0	0	0	0	0	0	0	0	2	0	1	0	0	0	0	0	0	0	0	0	0	0	0	0	8.92316	8.92316	8.92316	8.92316	8.92316	8.92316	8.92316	8.92316	8.92316
chr10:88918372-88921779+	0	0	0	0	0	0	0	0	0	0	0	0	0	0	0	0	0	0	0	0	0	1	0	0	2	0	0	0	0	0	0	0	0	0	0	0	0	0	0	0	8.92316	8.92316	8.92316	8.92316	8.92316	8.92316	8.92316	8.92316	8.92316
chr10:89068100-89088293-	0	0	0	0	0	0	0	0	0	0	0	0	0	0	0	0	0	0	0	0	1	0	0	0	0	0	0	0	0	0	0	0	2	0	0	0	0	0	0	0	8.92316	8.92316	8.92316	8.92316	8.92316	8.92316	8.92316	8.92316	8.92316
chr10:89417020-89431052-	0	0	0	0	0	0	0	0	0	0	0	0	0	0	0	0	0	0	0	0	2	0	0	0	0	0	0	0	0	0	0	0	0	0	0	0	0	0	0	0	8.92316	8.92316	8.92316	8.92316	8.92316	8.92316	8.92316	8.92316	8.92316
chr10:89473752-89483524-	4	11	0	5	5	1	2	1	12	1	1	5	3	3	3	1	1	2	1	0	11	5	4	0	0	2	1	1	3	1	1	2	2	0	1	0	1	0	2	2	10.2992	11.5468	8.92316	10.6771	10.6875	9.5523	9.90803	9.53126	11.6969
chr10:89480491-89483524-	0	0	0	2	0	0	0	0	0	0	0	0	0	0	0	0	0	0	0	0	0	0	0	0	0	0	0	0	0	0	0	0	0	0	0	0	0	0	0	0	8.92316	8.92316	8.92316	9.88598	8.92316	8.92316	8.92316	8.92316	8.92316
chr10:89652943-89662465-	0	2	0	0	1	0	0	0	0	0	0	0	0	0	0	0	0	0	0	0	0	0	0	0	0	0	0	0	0	0	0	0	0	0	0	0	1	0	0	0	8.92316	9.87826	8.92316	8.92316	9.48822	8.92316	8.92316	8.92316	8.92316
chr10:89669645-89678482-	0	0	0	0	0	0	0	0	0	0	0	0	0	0	0	0	0	0	0	0	0	0	0	0	0	0	0	0	0	0	0	0	0	0	0	0	2	0	0	0	8.92316	8.92316	8.92316	8.92316	8.92316	8.92316	8.92316	8.92316	8.92316
chr10:89772587-89791481+	0	0	0	0	0	0	0	0	0	0	0	0	0	0	0	0	0	0	0	0	2	0	0	0	0	0	0	0	0	0	0	0	0	0	0	0	0	0	0	0	8.92316	8.92316	8.92316	8.92316	8.92316	8.92316	8.92316	8.92316	8.92316
chr10:89772587-89794624+	2	0	1	2	0	0	0	0	2	0	0	0	0	0	0	1	0	1	0	0	0	0	1	0	1	0	0	0	0	0	0	0	0	0	0	0	0	0	0	0	9.7694	8.92316	9.48818	9.88598	8.92316	8.92316	8.92316	8.92316	9.90366
chr10:89774080-89787285+	0	0	0	0	0	0	0	0	0	0	0	0	0	0	0	0	0	0	0	0	0	0	0	0	0	0	0	0	0	0	0	0	0	0	0	0	1	2	0	1	8.92316	8.92316	8.92316	8.92316	8.92316	8.92316	8.92316	8.92316	8.92316
chr10:89779835-89794624+	0	0	0	0	0	0	0	0	0	0	0	0	0	0	0	0	1	0	0	0	0	0	0	0	0	0	0	0	0	0	4	0	0	1	0	0	0	0	0	0	8.92316	8.92316	8.92316	8.92316	8.92316	8.92316	8.92316	8.92316	8.92316
chr10:89787105-89794624+	0	1	0	0	0	0	2	0	0	1	0	0	0	0	0	0	0	0	0	1	0	0	0	0	0	0	0	0	0	0	0	1	0	0	0	0	0	0	0	0	8.92316	9.47834	8.92316	8.92316	8.92316	8.92316	9.90803	8.92316	8.92316
chr10:89787105-89803212+	0	0	0	0	0	0	0	0	0	0	0	2	0	1	0	0	0	0	0	0	0	0	0	0	0	0	0	0	0	0	0	0	0	0	0	0	0	0	0	0	8.92316	8.92316	8.92316	8.92316	8.92316	8.92316	8.92316	8.92316	8.92316
chr10:90989496-90991178-	0	0	0	0	0	0	0	0	0	0	0	0	0	0	0	0	0	0	0	0	0	0	0	0	0	0	0	0	0	0	0	0	0	0	0	0	0	2	0	0	8.92316	8.92316	8.92316	8.92316	8.92316	8.92316	8.92316	8.92316	8.92316
chr10:91036910-91049484-	0	0	0	0	0	0	0	0	0	0	0	0	0	0	0	2	0	0	0	0	0	0	0	0	0	0	0	0	0	0	0	0	0	0	0	0	0	0	0	0	8.92316	8.92316	8.92316	8.92316	8.92316	8.92316	8.92316	8.92316	8.92316
chr10:91039785-91049484-	0	0	0	0	0	0	0	0	0	0	0	0	0	0	0	0	0	0	0	0	0	0	0	0	3	0	0	0	0	0	0	0	0	0	0	0	0	0	0	0	8.92316	8.92316	8.92316	8.92316	8.92316	8.92316	8.92316	8.92316	8.92316
chr10:91059573-91077731-	0	0	0	0	0	0	0	0	0	1	0	0	0	0	0	0	0	0	2	0	0	0	0	0	0	0	0	0	0	0	0	1	0	0	0	0	0	0	0	0	8.92316	8.92316	8.92316	8.92316	8.92316	8.92316	8.92316	8.92316	8.92316
chr10:91077534-91079636-	0	0	2	0	0	0	0	0	0	0	0	0	0	0	0	0	0	0	0	0	0	0	0	0	0	0	0	0	0	0	0	0	0	0	0	0	0	0	0	0	8.92316	8.92316	9.89315	8.92316	8.92316	8.92316	8.92316	8.92316	8.92316
chr10:91079447-91080088-	2	0	0	0	0	0	0	0	0	0	0	0	0	0	0	0	0	0	0	0	0	0	0	0	0	0	0	0	0	1	0	0	0	0	0	0	0	0	0	0	9.7694	8.92316	8.92316	8.92316	8.92316	8.92316	8.92316	8.92316	8.92316
chr10:91161971-91162326-	0	0	0	0	2	0	0	0	0	0	0	0	0	0	0	0	0	0	0	0	0	0	0	0	0	0	0	0	0	0	0	0	0	0	0	0	0	0	0	0	8.92316	8.92316	8.92316	8.92316	9.89321	8.92316	8.92316	8.92316	8.92316
chr10:91162526-91162812-	0	0	0	0	0	0	0	0	0	0	0	0	0	0	0	0	0	0	0	0	0	0	0	0	0	0	0	2	0	0	0	0	0	0	0	0	0	0	0	0	8.92316	8.92316	8.92316	8.92316	8.92316	8.92316	8.92316	8.92316	8.92316
chr10:93221587-93239043+	0	0	0	0	0	0	2	0	0	0	0	0	0	0	0	0	0	0	0	0	0	0	0	0	1	0	0	0	0	0	0	0	0	0	0	0	0	0	0	0	8.92316	8.92316	8.92316	8.92316	8.92316	8.92316	9.90803	8.92316	8.92316
chr10:93221830-93221993+	0	0	0	0	0	0	0	0	0	0	0	0	2	0	0	0	0	0	0	0	0	0	0	0	0	0	0	0	0	0	0	0	0	0	0	0	0	0	0	0	8.92316	8.92316	8.92316	8.92316	8.92316	8.92316	8.92316	8.92316	8.92316
chr10:93221871-93222121+	0	0	0	0	0	0	0	0	0	0	0	0	0	0	0	0	0	0	0	2	0	0	0	0	0	0	0	0	0	0	0	0	0	0	0	0	0	0	0	0	8.92316	8.92316	8.92316	8.92316	8.92316	8.92316	8.92316	8.92316	8.92316
chr10:93222204-93222668+	0	0	0	0	0	0	1	0	0	0	0	0	0	1	0	0	0	0	0	1	0	0	0	0	0	0	2	0	0	0	0	0	0	0	0	0	0	0	0	0	8.92316	8.92316	8.92316	8.92316	8.92316	8.92316	9.49805	8.92316	8.92316
chr10:93223058-93223299+	0	0	0	0	0	0	0	0	0	0	0	0	0	0	0	0	0	0	0	0	0	0	0	0	0	0	0	0	0	2	0	0	0	0	0	0	0	0	0	0	8.92316	8.92316	8.92316	8.92316	8.92316	8.92316	8.92316	8.92316	8.92316
chr10:93235438-93236963+	3	0	0	3	0	0	2	4	0	0	1	5	1	1	0	0	0	0	0	1	1	4	0	0	0	0	5	1	2	2	0	0	0	2	1	4	0	2	0	3	10.0585	8.92316	8.92316	10.2004	8.92316	8.92316	9.90803	10.554	8.92316
chr10:93240368-93240689+	0	2	0	0	1	0	0	0	0	0	0	0	0	0	0	0	0	0	0	0	0	0	0	0	0	0	0	0	0	0	0	0	0	0	0	0	0	0	0	0	8.92316	9.87826	8.92316	8.92316	9.48822	8.92316	8.92316	8.92316	8.92316
chr10:93310752-93317793-	0	2	0	0	0	0	0	0	0	0	0	0	0	0	0	0	0	0	0	0	0	0	0	0	0	0	0	0	0	0	0	0	0	0	0	0	0	0	0	0	8.92316	9.87826	8.92316	8.92316	8.92316	8.92316	8.92316	8.92316	8.92316
chr10:93459817-93461430+	0	0	0	0	0	0	0	0	0	0	0	0	0	0	0	0	0	0	0	0	0	3	0	0	0	0	0	0	0	0	0	0	0	0	0	0	0	0	0	0	8.92316	8.92316	8.92316	8.92316	8.92316	8.92316	8.92316	8.92316	8.92316
chr10:93459872-93467164+	0	0	0	0	0	0	0	0	0	0	0	0	0	0	0	0	0	0	0	0	0	0	0	0	0	0	0	0	0	0	0	0	0	0	0	0	0	0	2	0	8.92316	8.92316	8.92316	8.92316	8.92316	8.92316	8.92316	8.92316	8.92316
chr10:93468756-93471366+	0	0	0	0	0	0	0	0	0	0	0	0	0	0	3	0	0	0	0	0	0	0	0	0	0	0	0	0	0	0	0	0	0	0	0	0	0	0	0	0	8.92316	8.92316	8.92316	8.92316	8.92316	8.92316	8.92316	8.92316	8.92316
chr10:93862377-93868961-	0	1	0	0	1	0	0	0	0	0	1	0	0	0	0	1	1	0	0	0	1	2	0	0	0	0	0	0	0	0	0	0	0	0	0	0	0	0	0	0	8.92316	9.47834	8.92316	8.92316	9.48822	8.92316	8.92316	8.92316	8.92316
chr10:93865407-93871649-	0	0	0	0	0	0	0	0	0	0	0	0	0	0	0	0	0	0	0	0	0	1	0	0	0	0	0	0	0	0	0	0	0	2	0	0	0	0	0	0	8.92316	8.92316	8.92316	8.92316	8.92316	8.92316	8.92316	8.92316	8.92316
chr10:93996838-94004082-	0	0	0	0	0	0	0	0	0	0	2	0	0	0	0	0	0	0	0	0	0	0	0	0	0	0	0	0	0	0	0	0	0	0	0	0	0	0	0	0	8.92316	8.92316	8.92316	8.92316	8.92316	8.92316	8.92316	8.92316	8.92316
chr10:94043302-94045633+	1	0	0	0	1	1	0	1	2	5	2	0	0	1	0	1	0	0	0	0	0	0	2	0	5	1	0	2	0	2	0	2	0	0	0	0	1	1	1	0	9.40746	8.92316	8.92316	8.92316	9.48822	9.5523	8.92316	9.53126	9.90366
chr10:94043302-94045813+	0	0	0	0	0	0	0	0	0	0	0	0	0	0	0	0	0	0	0	0	0	0	0	0	0	3	0	0	0	0	0	0	0	0	0	0	0	0	0	0	8.92316	8.92316	8.92316	8.92316	8.92316	8.92316	8.92316	8.92316	8.92316
chr10:94043302-94074330+	0	0	0	0	0	0	0	0	0	0	1	1	0	2	0	0	0	0	0	0	0	0	0	0	0	0	0	0	0	0	0	0	0	0	0	0	0	0	0	0	8.92316	8.92316	8.92316	8.92316	8.92316	8.92316	8.92316	8.92316	8.92316
chr10:94052034-94052199+	0	0	0	0	0	0	0	0	0	0	0	0	0	0	0	0	0	0	0	0	0	0	0	0	0	0	0	0	0	0	0	0	0	0	0	0	0	2	0	0	8.92316	8.92316	8.92316	8.92316	8.92316	8.92316	8.92316	8.92316	8.92316
chr10:94089577-94089762+	0	0	0	0	0	2	0	0	1	0	0	0	0	0	0	0	0	0	0	0	0	0	0	0	0	0	0	0	1	0	0	0	0	0	0	0	0	0	0	0	8.92316	8.92316	8.92316	8.92316	8.92316	9.98893	8.92316	8.92316	9.49515
chr10:94100402-94106072+	0	0	0	0	0	0	0	0	2	0	0	0	0	0	0	0	0	0	0	0	0	0	0	0	0	0	0	0	0	0	0	0	0	0	0	0	0	0	0	0	8.92316	8.92316	8.92316	8.92316	8.92316	8.92316	8.92316	8.92316	9.90366
chr10:94168044-94168420+	0	0	0	0	0	0	0	1	0	1	0	3	3	0	0	1	0	4	0	2	2	2	1	0	0	1	0	1	2	1	0	0	0	0	1	0	1	0	2	0	8.92316	8.92316	8.92316	8.92316	8.92316	8.92316	8.92316	9.53126	8.92316
chr10:94578828-94579280+	0	0	0	0	0	0	0	0	2	0	0	0	0	0	0	0	0	0	0	0	0	0	0	0	0	0	0	0	0	0	0	0	0	0	0	0	0	0	0	0	8.92316	8.92316	8.92316	8.92316	8.92316	8.92316	8.92316	8.92316	9.90366
chr10:94718852-94728722+	0	0	0	0	0	0	0	0	0	0	0	1	0	4	0	0	0	0	0	0	0	0	0	1	0	0	0	0	0	0	0	1	0	1	0	0	0	0	0	0	8.92316	8.92316	8.92316	8.92316	8.92316	8.92316	8.92316	8.92316	8.92316
chr10:94906465-94922770-	0	0	0	0	0	0	0	0	0	0	0	0	0	0	0	0	0	0	3	0	0	0	0	0	0	0	0	0	0	0	0	0	0	0	0	0	0	0	0	0	8.92316	8.92316	8.92316	8.92316	8.92316	8.92316	8.92316	8.92316	8.92316
chr10:95420175-95442488+	0	0	0	0	0	0	0	0	0	0	0	0	0	0	0	0	0	0	0	2	0	0	0	0	0	0	0	0	0	0	0	0	0	0	0	0	0	0	0	0	8.92316	8.92316	8.92316	8.92316	8.92316	8.92316	8.92316	8.92316	8.92316
chr10:95548446-95549344-	0	0	0	0	0	0	0	0	0	0	0	0	2	0	0	0	0	0	0	0	0	0	0	0	0	0	0	0	0	0	0	0	0	0	0	0	0	0	0	0	8.92316	8.92316	8.92316	8.92316	8.92316	8.92316	8.92316	8.92316	8.92316
chr10:95973986-95997092+	0	0	0	0	0	0	0	0	0	1	0	0	0	0	0	0	0	0	0	0	0	0	0	0	0	0	0	0	0	0	0	0	0	0	0	2	0	0	0	0	8.92316	8.92316	8.92316	8.92316	8.92316	8.92316	8.92316	8.92316	8.92316
chr10:95973986-96013425+	0	0	0	0	0	0	0	0	0	0	1	0	0	2	0	0	0	0	0	0	0	0	0	0	0	0	0	0	0	0	0	0	0	0	0	0	0	0	0	0	8.92316	8.92316	8.92316	8.92316	8.92316	8.92316	8.92316	8.92316	8.92316
chr10:95989562-95990465+	0	0	0	0	0	0	0	0	0	0	0	0	0	0	0	0	0	0	0	0	2	0	0	0	0	1	0	0	0	0	0	0	0	0	0	0	0	0	0	0	8.92316	8.92316	8.92316	8.92316	8.92316	8.92316	8.92316	8.92316	8.92316
chr10:95989562-95995690+	1	2	2	0	0	0	0	1	2	3	3	0	0	0	0	1	0	0	1	0	0	0	0	1	0	0	0	0	0	0	1	1	2	1	0	0	1	0	1	0	9.40746	9.87826	9.89315	8.92316	8.92316	8.92316	8.92316	9.53126	9.90366
chr10:95989562-95997092+	0	0	0	0	0	0	0	0	0	0	0	0	0	0	0	0	0	0	0	0	0	0	0	3	0	0	0	0	0	0	0	0	0	0	0	0	0	0	0	0	8.92316	8.92316	8.92316	8.92316	8.92316	8.92316	8.92316	8.92316	8.92316
chr10:96010775-96021720+	0	0	0	0	0	0	0	0	0	0	0	0	0	0	0	0	0	0	0	0	0	0	0	0	0	2	0	0	0	0	0	0	0	0	0	0	0	0	0	0	8.92316	8.92316	8.92316	8.92316	8.92316	8.92316	8.92316	8.92316	8.92316
chr10:98922759-98922922+	0	0	0	0	0	0	0	0	2	0	0	0	0	0	0	0	0	0	0	0	0	0	0	0	0	0	0	0	0	0	0	0	0	0	0	0	0	0	0	0	8.92316	8.92316	8.92316	8.92316	8.92316	8.92316	8.92316	8.92316	9.90366
chr10:98968694-98969124+	0	3	1	3	0	0	1	0	1	0	0	0	0	0	0	0	1	2	0	0	0	1	0	0	0	0	0	0	0	0	0	0	1	0	0	0	0	1	0	0	8.92316	10.191	9.48818	10.2004	8.92316	8.92316	9.49805	8.92316	9.49515
chr10:98968694-98987366+	0	1	0	0	0	0	0	0	0	0	0	0	0	0	0	0	0	0	0	0	0	0	0	0	0	0	0	0	0	0	1	0	1	0	0	0	0	3	0	0	8.92316	9.47834	8.92316	8.92316	8.92316	8.92316	8.92316	8.92316	8.92316
chr10:98979704-98987366+	0	0	0	0	0	0	0	0	0	0	0	0	0	0	0	0	0	0	0	0	0	0	0	0	0	0	2	0	0	0	0	0	2	0	0	0	0	0	0	0	8.92316	8.92316	8.92316	8.92316	8.92316	8.92316	8.92316	8.92316	8.92316
chr10:99009404-99010780+	0	0	0	0	0	0	0	0	0	0	2	0	0	0	0	0	0	0	0	0	0	0	0	0	0	0	0	0	0	0	0	0	0	0	0	0	0	0	0	0	8.92316	8.92316	8.92316	8.92316	8.92316	8.92316	8.92316	8.92316	8.92316
chr10:99110896-99111111+	0	0	0	0	0	0	0	0	0	0	0	0	0	0	0	0	0	0	0	0	0	0	0	0	0	0	0	0	0	0	0	0	0	0	0	0	0	0	2	0	8.92316	8.92316	8.92316	8.92316	8.92316	8.92316	8.92316	8.92316	8.92316
chr10:99124831-99129662+	1	0	3	0	1	0	1	0	0	1	0	0	0	2	0	0	0	2	0	0	1	2	2	1	1	2	0	1	0	0	0	0	0	3	2	0	0	0	0	0	9.40746	8.92316	10.209	8.92316	9.48822	8.92316	9.49805	8.92316	8.92316
chr10:99124831-99144594+	0	0	0	3	0	1	0	0	2	0	0	0	0	0	0	0	0	0	0	0	0	0	0	0	0	0	0	0	0	0	0	0	0	0	0	0	0	0	0	0	8.92316	8.92316	8.92316	10.2004	8.92316	9.5523	8.92316	8.92316	9.90366
chr10:99144235-99156351+	0	0	0	0	0	0	0	0	0	0	2	0	0	0	0	0	0	0	0	1	0	0	0	0	0	0	0	0	0	1	0	0	0	0	0	0	0	0	0	0	8.92316	8.92316	8.92316	8.92316	8.92316	8.92316	8.92316	8.92316	8.92316
chr10:99144235-99164949+	0	2	0	0	4	1	2	0	0	0	3	0	0	1	0	0	2	0	0	0	0	3	0	3	0	0	0	5	3	0	0	1	0	2	1	0	1	0	2	0	8.92316	9.87826	8.92316	8.92316	10.468	9.5523	9.90803	8.92316	8.92316
chr10:99181857-99182117+	0	0	0	0	0	0	0	0	0	0	0	5	0	0	0	0	0	0	0	0	0	0	0	0	0	0	0	0	0	0	0	0	0	0	0	0	0	0	0	0	8.92316	8.92316	8.92316	8.92316	8.92316	8.92316	8.92316	8.92316	8.92316
chr10:100466021-100478022-	0	0	1	3	0	0	0	0	0	0	0	0	0	0	0	0	0	0	0	0	0	0	0	0	0	0	0	0	0	0	0	0	0	0	0	0	0	0	0	0	8.92316	8.92316	9.48818	10.2004	8.92316	8.92316	8.92316	8.92316	8.92316
chr10:105271499-105323637-	0	0	0	0	0	0	0	0	0	1	0	0	0	0	0	1	1	0	0	0	0	0	1	0	0	3	0	0	0	0	0	0	0	0	0	0	0	0	0	0	8.92316	8.92316	8.92316	8.92316	8.92316	8.92316	8.92316	8.92316	8.92316
chr10:105271499-105370778-	2	0	0	0	0	0	0	0	0	0	0	0	0	0	0	0	0	0	0	0	0	0	0	0	0	0	0	0	0	0	0	0	0	0	0	0	0	0	0	0	9.7694	8.92316	8.92316	8.92316	8.92316	8.92316	8.92316	8.92316	8.92316
chr10:105303594-105323637-	1	1	0	0	0	0	0	0	3	0	0	0	0	0	0	0	0	0	0	0	0	1	3	0	0	0	0	0	0	0	1	0	1	1	2	2	5	0	6	0	9.40746	9.47834	8.92316	8.92316	8.92316	8.92316	8.92316	8.92316	10.2217
chr10:105303594-105348549-	0	0	2	0	0	0	0	0	0	0	0	0	0	0	0	0	0	1	0	0	0	0	0	0	0	0	0	0	0	0	1	0	2	0	0	0	0	0	0	0	8.92316	8.92316	9.89315	8.92316	8.92316	8.92316	8.92316	8.92316	8.92316
chr10:105303594-105370778-	2	0	2	0	0	0	0	0	0	0	0	0	0	0	0	0	0	0	0	0	0	0	0	0	0	0	0	0	0	0	0	0	0	0	0	0	0	0	1	0	9.7694	8.92316	9.89315	8.92316	8.92316	8.92316	8.92316	8.92316	8.92316
chr10:105321396-105323637-	4	0	2	1	0	0	2	1	0	0	0	0	0	0	1	1	0	0	2	0	0	0	0	0	0	0	1	0	0	0	0	0	0	0	0	0	0	0	0	0	10.2992	8.92316	9.89315	9.48344	8.92316	8.92316	9.90803	9.53126	8.92316
chr10:105348435-105370778-	0	0	4	2	0	0	1	0	1	2	0	0	0	0	7	0	1	0	0	0	1	1	6	0	1	0	1	0	0	2	0	0	0	0	0	2	0	0	0	0	8.92316	8.92316	10.468	9.88598	8.92316	8.92316	9.49805	8.92316	9.49515
chr10:105348435-105413787-	0	1	0	0	1	1	1	0	0	2	0	0	0	0	0	0	0	0	0	0	0	0	0	0	0	0	0	0	0	0	0	0	0	0	0	0	0	0	0	0	8.92316	9.47834	8.92316	8.92316	9.48822	9.5523	9.49805	8.92316	8.92316
chr10:105369950-105370778-	1	0	0	0	0	1	0	0	0	0	3	2	0	3	0	0	0	0	0	1	0	0	0	0	0	0	0	0	0	0	0	0	0	0	0	0	0	0	0	0	9.40746	8.92316	8.92316	8.92316	8.92316	9.5523	8.92316	8.92316	8.92316
chr10:105369950-105413787-	2	0	0	0	0	0	0	0	0	0	0	0	1	0	0	0	0	1	1	0	0	0	0	0	0	0	0	1	2	0	0	0	0	1	0	0	0	0	0	0	9.7694	8.92316	8.92316	8.92316	8.92316	8.92316	8.92316	8.92316	8.92316
chr10:105413217-105413787-	3	2	5	11	4	0	1	0	0	2	0	0	0	0	1	2	3	1	0	1	0	2	0	1	0	1	0	2	3	0	1	0	2	1	1	2	0	0	0	0	10.0585	9.87826	10.6874	11.5601	10.468	8.92316	9.49805	8.92316	8.92316
chr10:105550492-105550652-	0	0	0	0	0	0	0	0	0	2	0	0	0	0	0	0	0	0	0	0	0	0	0	0	0	0	0	0	0	0	0	0	0	0	0	0	0	0	0	0	8.92316	8.92316	8.92316	8.92316	8.92316	8.92316	8.92316	8.92316	8.92316
chr10:107380080-107382713+	0	0	0	0	0	0	0	0	0	0	0	0	0	0	0	0	0	0	0	0	0	0	0	0	0	0	0	2	0	0	0	0	0	0	0	0	0	0	0	0	8.92316	8.92316	8.92316	8.92316	8.92316	8.92316	8.92316	8.92316	8.92316
chr10:108198833-108214506+	0	1	0	0	0	0	2	1	0	0	0	0	0	0	0	0	0	0	0	0	0	0	0	0	0	0	0	0	0	0	0	1	0	0	0	0	0	0	0	0	8.92316	9.47834	8.92316	8.92316	8.92316	8.92316	9.90803	9.53126	8.92316
chr10:108230437-108234115+	0	2	0	0	0	0	0	0	0	0	0	0	0	0	0	0	0	0	0	0	0	0	0	0	0	0	0	0	0	0	0	0	0	0	0	0	0	0	0	0	8.92316	9.87826	8.92316	8.92316	8.92316	8.92316	8.92316	8.92316	8.92316
chr10:108230437-108243130+	0	0	0	0	0	0	0	0	0	0	0	0	0	0	0	0	0	0	0	0	0	0	0	0	0	0	0	0	0	0	0	0	0	0	3	0	0	0	0	0	8.92316	8.92316	8.92316	8.92316	8.92316	8.92316	8.92316	8.92316	8.92316
chr10:108240105-108243130+	0	1	1	1	0	0	1	1	2	1	0	1	0	0	0	0	0	1	5	0	0	0	0	2	3	0	0	1	3	1	0	1	0	0	0	0	2	0	2	1	8.92316	9.47834	9.48818	9.48344	8.92316	8.92316	9.49805	9.53126	9.90366
chr10:108240105-108251008+	1	0	0	1	0	0	0	0	0	0	0	0	0	0	0	0	0	0	0	0	0	0	2	0	2	0	1	0	0	0	0	0	1	0	0	1	0	2	0	0	9.40746	8.92316	8.92316	9.48344	8.92316	8.92316	8.92316	8.92316	8.92316
chr10:108240105-108252924+	0	0	0	0	2	0	0	0	0	0	0	0	0	0	0	0	0	0	0	0	0	0	0	0	0	0	1	0	0	0	0	0	1	0	0	0	0	0	0	0	8.92316	8.92316	8.92316	8.92316	9.89321	8.92316	8.92316	8.92316	8.92316
chr10:108240105-108253495+	4	0	0	2	1	0	2	0	0	0	0	0	0	0	0	0	0	0	0	0	4	2	0	0	0	0	2	0	2	0	0	0	0	0	0	0	1	0	1	0	10.2992	8.92316	8.92316	9.88598	9.48822	8.92316	9.90803	8.92316	8.92316
chr10:108249435-108253495+	0	0	0	0	0	0	0	0	0	0	0	0	0	0	0	0	0	2	0	0	0	0	0	0	0	0	0	0	0	0	0	0	0	0	0	0	0	0	0	0	8.92316	8.92316	8.92316	8.92316	8.92316	8.92316	8.92316	8.92316	8.92316
chr10:108253325-108261036+	0	0	0	0	0	0	0	0	0	0	0	0	0	0	0	0	0	0	0	0	0	0	0	0	0	0	0	0	0	0	0	0	0	0	0	0	0	2	0	0	8.92316	8.92316	8.92316	8.92316	8.92316	8.92316	8.92316	8.92316	8.92316
chr10:108268572-108274188+	4	2	0	1	1	1	0	0	0	0	1	0	1	1	0	1	1	0	2	1	1	1	0	0	0	0	1	0	1	0	1	0	0	1	0	1	1	0	1	0	10.2992	9.87826	8.92316	9.48344	9.48822	9.5523	8.92316	8.92316	8.92316
chr10:108315277-108315535-	0	0	0	0	0	0	0	0	0	0	0	0	0	0	0	0	0	0	0	0	0	0	0	0	0	0	0	0	0	0	0	0	0	0	0	0	0	3	0	1	8.92316	8.92316	8.92316	8.92316	8.92316	8.92316	8.92316	8.92316	8.92316
chr10:108690884-108691063-	0	4	0	0	0	0	0	0	0	0	0	0	0	0	0	0	0	0	0	0	0	0	0	0	0	0	0	0	0	0	0	0	0	0	0	0	0	0	0	0	8.92316	10.4479	8.92316	8.92316	8.92316	8.92316	8.92316	8.92316	8.92316
chr10:109816254-109824681-	0	0	0	0	0	0	0	0	0	0	1	1	2	2	0	0	1	0	0	0	0	0	0	0	0	0	0	0	0	0	0	0	0	0	0	0	0	0	0	0	8.92316	8.92316	8.92316	8.92316	8.92316	8.92316	8.92316	8.92316	8.92316
chr10:109816254-109841818-	0	2	0	0	0	0	0	0	0	0	0	0	0	0	0	0	0	0	0	0	0	0	0	0	0	0	0	0	0	0	0	0	0	0	0	0	0	0	0	0	8.92316	9.87826	8.92316	8.92316	8.92316	8.92316	8.92316	8.92316	8.92316
chr10:109880535-109903863-	0	0	0	0	0	0	0	0	0	0	0	0	0	0	0	0	0	0	0	0	0	0	0	0	0	0	0	1	2	0	0	0	0	0	0	0	0	0	0	0	8.92316	8.92316	8.92316	8.92316	8.92316	8.92316	8.92316	8.92316	8.92316
chr10:111273026-111280388+	0	0	0	0	0	0	0	0	0	0	0	0	0	0	0	0	0	0	0	0	0	0	0	0	0	2	0	0	0	0	0	0	0	0	0	0	0	0	0	0	8.92316	8.92316	8.92316	8.92316	8.92316	8.92316	8.92316	8.92316	8.92316
chr10:111485499-111491137+	0	0	0	0	0	0	0	0	0	0	0	0	0	0	0	0	0	0	0	0	0	0	0	0	0	0	0	0	0	0	0	0	0	0	0	0	0	0	3	0	8.92316	8.92316	8.92316	8.92316	8.92316	8.92316	8.92316	8.92316	8.92316
chr10:111508169-111508422+	0	0	0	0	2	0	0	0	0	0	0	0	0	0	0	0	0	0	0	0	0	0	0	0	0	0	0	0	0	0	0	0	0	0	0	0	0	0	0	0	8.92316	8.92316	8.92316	8.92316	9.89321	8.92316	8.92316	8.92316	8.92316
chr10:111975485-111977398+	0	0	0	0	0	0	0	0	2	0	0	0	0	0	0	0	0	0	0	0	0	0	0	0	0	0	0	0	0	0	0	0	0	0	0	0	0	0	0	0	8.92316	8.92316	8.92316	8.92316	8.92316	8.92316	8.92316	8.92316	9.90366
chr10:111976742-111977398+	0	0	0	0	0	0	0	0	0	0	0	0	0	0	0	0	0	0	0	0	0	0	0	0	0	0	0	0	0	0	0	0	0	0	0	0	0	0	2	0	8.92316	8.92316	8.92316	8.92316	8.92316	8.92316	8.92316	8.92316	8.92316
chr10:115294871-115302791-	0	0	0	0	2	0	0	0	0	0	0	0	0	1	0	0	0	0	0	0	0	0	0	0	0	0	0	0	0	0	0	0	0	0	0	0	0	0	0	0	8.92316	8.92316	8.92316	8.92316	9.89321	8.92316	8.92316	8.92316	8.92316
chr10:115298828-115302791-	0	0	0	0	0	0	0	0	0	0	0	0	0	0	0	0	2	0	0	0	0	0	0	0	0	0	0	0	0	0	0	0	0	0	0	0	0	0	0	0	8.92316	8.92316	8.92316	8.92316	8.92316	8.92316	8.92316	8.92316	8.92316
chr10:115342474-115347783-	0	0	0	0	0	0	0	0	0	0	0	2	0	0	0	0	0	0	0	0	0	0	0	0	0	0	0	0	0	0	0	0	0	0	0	0	0	0	0	0	8.92316	8.92316	8.92316	8.92316	8.92316	8.92316	8.92316	8.92316	8.92316
chr10:115386965-115390436+	0	0	0	0	0	0	0	0	0	0	0	0	0	0	0	0	0	0	0	0	0	0	0	0	0	0	0	0	0	0	0	0	0	0	2	0	0	0	0	0	8.92316	8.92316	8.92316	8.92316	8.92316	8.92316	8.92316	8.92316	8.92316
chr10:115390650-115406898+	0	0	0	0	0	0	0	0	0	0	0	0	0	0	0	0	0	2	0	0	0	0	0	0	0	0	0	0	0	0	0	0	0	0	0	0	0	0	0	0	8.92316	8.92316	8.92316	8.92316	8.92316	8.92316	8.92316	8.92316	8.92316
chr10:115390650-115420879+	0	0	0	0	0	0	0	0	0	0	0	0	0	2	0	0	0	1	0	0	0	0	0	0	0	0	0	0	0	0	0	0	0	0	0	0	0	0	0	0	8.92316	8.92316	8.92316	8.92316	8.92316	8.92316	8.92316	8.92316	8.92316
chr10:115406353-115406898+	0	0	0	0	3	0	0	0	5	1	1	0	0	0	0	0	0	0	1	0	0	0	3	0	0	0	1	0	0	1	0	1	0	0	0	0	1	1	0	0	8.92316	8.92316	8.92316	8.92316	10.2091	8.92316	8.92316	8.92316	10.7026
chr10:115411199-115418828+	0	0	0	0	0	0	0	0	0	0	0	0	0	0	0	0	0	2	0	0	0	0	0	0	0	0	0	0	0	0	0	0	0	0	0	0	0	0	0	0	8.92316	8.92316	8.92316	8.92316	8.92316	8.92316	8.92316	8.92316	8.92316
chr10:115411720-115428961+	0	0	2	0	0	0	0	0	0	0	0	0	0	0	0	0	0	0	0	0	0	0	0	0	0	0	0	0	0	0	0	0	0	0	0	0	0	0	0	0	8.92316	8.92316	9.89315	8.92316	8.92316	8.92316	8.92316	8.92316	8.92316
chr10:115424558-115428961+	0	0	0	0	0	0	0	0	1	0	1	0	0	0	0	0	0	0	0	0	0	1	0	0	0	0	0	0	0	0	0	0	0	0	0	2	0	0	0	0	8.92316	8.92316	8.92316	8.92316	8.92316	8.92316	8.92316	8.92316	9.49515
chr10:115827821-115840000+	0	0	0	0	0	0	0	0	0	0	0	0	0	0	0	0	0	0	0	0	0	0	0	0	0	0	0	0	0	0	0	0	0	0	3	0	0	0	0	0	8.92316	8.92316	8.92316	8.92316	8.92316	8.92316	8.92316	8.92316	8.92316
chr10:115849343-115849493+	0	0	2	0	0	0	0	0	0	0	0	0	0	0	0	0	0	0	0	0	0	0	0	0	0	0	0	0	0	0	0	0	0	0	0	0	0	0	0	0	8.92316	8.92316	9.89315	8.92316	8.92316	8.92316	8.92316	8.92316	8.92316
chr10:116177718-116188468+	0	0	1	2	0	0	0	0	0	0	0	0	0	0	0	2	0	0	0	0	0	0	0	0	0	0	0	0	0	0	0	0	0	0	0	0	0	0	0	0	8.92316	8.92316	9.48818	9.88598	8.92316	8.92316	8.92316	8.92316	8.92316
chr10:116236679-116256243+	0	1	0	0	0	0	0	0	0	0	0	0	0	0	0	1	1	0	0	0	1	0	0	0	2	0	0	0	1	0	0	0	0	0	0	0	0	0	0	0	8.92316	9.47834	8.92316	8.92316	8.92316	8.92316	8.92316	8.92316	8.92316
chr10:116251112-116256243+	0	0	0	0	0	0	0	0	0	0	0	0	0	0	0	0	0	0	0	0	0	0	0	0	0	0	0	0	0	0	2	0	1	0	0	0	0	0	0	0	8.92316	8.92316	8.92316	8.92316	8.92316	8.92316	8.92316	8.92316	8.92316
chr10:116343793-116354034+	2	0	0	0	0	0	0	0	0	0	0	0	0	0	0	0	0	0	0	0	0	0	0	0	0	0	0	0	0	0	0	0	0	0	0	0	0	0	0	0	9.7694	8.92316	8.92316	8.92316	8.92316	8.92316	8.92316	8.92316	8.92316
chr10:116498086-116499466-	0	0	0	0	0	0	0	0	0	0	0	0	0	0	0	0	0	0	0	0	0	0	0	0	2	0	0	0	0	0	0	0	0	0	0	0	0	0	0	0	8.92316	8.92316	8.92316	8.92316	8.92316	8.92316	8.92316	8.92316	8.92316
chr10:116517317-116549105-	0	0	2	1	0	0	0	0	4	0	2	0	0	0	0	1	1	4	0	1	2	2	0	1	1	0	0	0	1	0	0	0	0	2	2	0	1	1	0	0	8.92316	8.92316	9.89315	9.48344	8.92316	8.92316	8.92316	8.92316	10.4821
chr10:116517317-116549175-	0	3	2	1	2	0	6	4	3	2	0	0	2	0	2	5	3	6	1	2	0	2	3	2	9	0	0	0	5	3	1	1	2	0	3	5	5	4	4	4	8.92316	10.191	9.89315	9.48344	9.89321	8.92316	10.9004	10.554	10.2217
chr10:116527827-116549105-	0	0	0	0	0	0	0	0	0	0	0	0	0	1	0	0	0	0	0	0	2	0	0	0	0	0	0	0	0	0	0	0	0	0	1	0	0	0	0	0	8.92316	8.92316	8.92316	8.92316	8.92316	8.92316	8.92316	8.92316	8.92316
chr10:116527827-116549175-	0	0	0	0	0	0	0	3	1	0	0	0	0	0	1	0	0	0	1	2	0	0	0	0	0	0	0	0	0	0	0	2	0	2	0	0	0	0	0	0	8.92316	8.92316	8.92316	8.92316	8.92316	8.92316	8.92316	10.2865	9.49515
chr10:116928189-116939481-	0	0	0	0	0	0	0	0	0	0	0	0	0	0	0	0	0	0	1	0	0	3	0	1	0	0	0	0	0	0	0	0	0	0	0	0	0	0	0	0	8.92316	8.92316	8.92316	8.92316	8.92316	8.92316	8.92316	8.92316	8.92316
chr10:116937397-116939481-	0	3	2	3	3	0	0	1	2	3	2	1	4	1	0	1	1	4	1	0	0	2	0	3	0	0	0	0	1	0	0	0	1	0	0	0	2	0	0	2	8.92316	10.191	9.89315	10.2004	10.2091	8.92316	8.92316	9.53126	9.90366
chr10:117069578-117069970-	0	0	0	0	0	0	0	0	0	0	0	0	0	0	0	0	0	0	0	3	0	0	0	0	0	0	0	0	0	0	0	0	0	0	0	0	0	0	0	0	8.92316	8.92316	8.92316	8.92316	8.92316	8.92316	8.92316	8.92316	8.92316
chr10:117098318-117112098-	0	0	0	2	0	0	0	0	0	0	0	0	0	0	0	0	0	0	0	0	0	0	0	0	0	0	0	0	0	0	0	0	0	0	0	0	0	0	0	0	8.92316	8.92316	8.92316	9.88598	8.92316	8.92316	8.92316	8.92316	8.92316
chr10:117099943-117102198-	0	0	0	0	0	0	1	0	0	0	1	0	0	1	0	0	0	1	0	0	1	0	0	0	0	0	3	0	0	0	1	0	0	0	2	0	0	0	0	0	8.92316	8.92316	8.92316	8.92316	8.92316	8.92316	9.49805	8.92316	8.92316
chr10:117277808-117288269-	0	0	0	0	0	0	0	0	0	0	0	0	0	0	0	0	0	0	0	2	0	0	0	0	0	0	0	0	0	0	0	0	0	0	0	0	0	0	0	0	8.92316	8.92316	8.92316	8.92316	8.92316	8.92316	8.92316	8.92316	8.92316
chr10:117282186-117292781-	0	0	0	0	0	0	0	0	0	0	0	0	0	0	0	0	2	0	0	0	0	0	0	1	0	0	0	0	0	0	0	0	0	0	0	0	0	0	0	0	8.92316	8.92316	8.92316	8.92316	8.92316	8.92316	8.92316	8.92316	8.92316
chr10:117349311-117367988-	0	2	1	2	1	0	0	0	0	0	1	0	0	0	0	0	1	3	0	0	0	0	1	1	0	0	0	0	0	0	3	1	0	0	2	0	2	0	0	1	8.92316	9.87826	9.48818	9.88598	9.48822	8.92316	8.92316	8.92316	8.92316
chr10:117355935-117360555-	0	0	0	0	0	0	0	0	0	1	0	0	0	0	0	0	0	0	0	0	0	0	0	0	0	0	0	0	0	0	0	0	0	0	0	2	0	0	0	0	8.92316	8.92316	8.92316	8.92316	8.92316	8.92316	8.92316	8.92316	8.92316
chr10:117355935-117363120-	0	0	0	0	0	0	0	0	0	0	0	1	0	2	0	0	0	0	0	0	0	0	1	2	0	0	0	0	0	0	2	0	0	0	0	0	0	0	0	0	8.92316	8.92316	8.92316	8.92316	8.92316	8.92316	8.92316	8.92316	8.92316
chr10:117355935-117367988-	0	1	0	0	0	0	1	2	1	3	0	0	0	0	1	3	1	0	2	0	0	0	1	3	1	1	1	0	0	0	1	0	1	0	4	0	0	2	0	1	8.92316	9.47834	8.92316	8.92316	8.92316	8.92316	9.49805	9.95773	9.49515
chr10:117360440-117363120-	0	0	0	0	0	0	0	0	0	0	0	0	0	0	0	2	0	0	0	0	0	0	0	0	0	0	0	0	0	0	0	1	0	0	0	0	0	0	0	0	8.92316	8.92316	8.92316	8.92316	8.92316	8.92316	8.92316	8.92316	8.92316
chr10:117366081-117367988-	0	1	0	1	1	0	1	0	1	0	0	0	0	2	0	0	1	0	0	1	3	1	0	0	2	0	0	0	0	1	1	0	0	0	0	0	0	0	0	0	8.92316	9.47834	8.92316	9.48344	9.48822	8.92316	9.49805	8.92316	9.49515
chr10:117667949-117680111+	0	0	0	0	0	0	0	0	0	0	0	0	0	0	0	0	0	0	1	0	0	0	0	0	0	0	0	0	0	0	0	0	0	0	0	3	0	0	0	0	8.92316	8.92316	8.92316	8.92316	8.92316	8.92316	8.92316	8.92316	8.92316
chr10:117692582-117695068-	0	0	0	0	0	0	1	0	0	1	0	0	0	0	0	0	0	0	0	0	0	1	0	0	0	0	0	0	0	0	0	0	0	0	0	0	0	2	0	0	8.92316	8.92316	8.92316	8.92316	8.92316	8.92316	9.49805	8.92316	8.92316
chr10:117759172-117762135-	0	0	0	0	0	0	0	0	0	0	0	0	0	0	0	0	0	0	0	0	0	0	0	0	0	0	2	0	0	0	0	0	0	0	0	0	0	0	0	0	8.92316	8.92316	8.92316	8.92316	8.92316	8.92316	8.92316	8.92316	8.92316
chr10:117784995-117787911-	2	0	0	0	0	0	0	0	0	0	0	0	0	0	0	0	0	0	0	0	0	0	0	1	0	0	2	2	1	0	0	0	0	0	0	0	0	0	0	0	9.7694	8.92316	8.92316	8.92316	8.92316	8.92316	8.92316	8.92316	8.92316
chr10:117817344-117818609-	0	1	0	0	0	0	0	0	0	0	3	0	0	1	0	0	0	0	0	0	0	0	0	0	0	0	0	2	0	0	0	0	0	0	0	0	0	0	0	0	8.92316	9.47834	8.92316	8.92316	8.92316	8.92316	8.92316	8.92316	8.92316
chr10:117820462-117822869-	0	0	0	0	0	3	1	0	1	0	0	0	0	1	0	1	0	0	0	0	0	0	2	0	0	0	0	0	0	0	1	0	1	1	0	0	0	0	0	0	8.92316	8.92316	8.92316	8.92316	8.92316	10.3237	9.49805	8.92316	9.49515
chr10:117841378-117841587-	0	0	0	0	0	0	0	0	0	0	0	0	0	0	0	0	0	0	0	0	0	0	0	0	0	2	2	0	0	0	0	0	0	0	0	0	0	0	0	0	8.92316	8.92316	8.92316	8.92316	8.92316	8.92316	8.92316	8.92316	8.92316
chr10:119208063-119239882-	2	0	0	0	0	0	0	0	0	0	0	0	0	0	0	0	0	0	0	0	0	0	0	0	0	0	0	0	0	0	0	0	0	0	0	0	0	0	0	0	9.7694	8.92316	8.92316	8.92316	8.92316	8.92316	8.92316	8.92316	8.92316
chr10:120170318-120182708-	0	0	0	0	0	0	0	0	0	0	0	0	0	0	0	0	0	0	0	0	0	0	0	0	0	0	0	0	2	0	0	0	0	0	0	0	0	0	0	0	8.92316	8.92316	8.92316	8.92316	8.92316	8.92316	8.92316	8.92316	8.92316
chr10:120176231-120182708-	0	1	0	0	0	1	0	0	0	1	0	0	0	0	0	0	0	0	0	0	2	0	2	0	0	1	0	0	0	1	0	0	0	0	1	2	0	0	0	0	8.92316	9.47834	8.92316	8.92316	8.92316	9.5523	8.92316	8.92316	8.92316
chr10:120423231-120436465-	0	0	0	0	0	0	0	0	2	0	0	0	0	0	0	0	0	0	0	0	0	0	0	0	0	0	0	0	0	0	0	0	0	0	0	0	0	0	0	0	8.92316	8.92316	8.92316	8.92316	8.92316	8.92316	8.92316	8.92316	9.90366
chr10:120791402-120871151-	0	0	0	0	0	0	0	0	0	0	0	0	0	0	0	0	0	0	0	0	0	0	0	0	0	2	0	0	0	0	0	0	0	0	0	0	0	0	0	0	8.92316	8.92316	8.92316	8.92316	8.92316	8.92316	8.92316	8.92316	8.92316
chr10:120825108-120852092-	3	1	0	1	1	3	0	3	1	5	1	3	4	4	2	1	2	0	0	1	3	5	0	2	0	1	0	1	1	1	0	0	1	3	3	3	3	0	0	4	10.0585	9.47834	8.92316	9.48344	9.48822	10.3237	8.92316	10.2865	9.49515
chr10:120825108-120871151-	0	0	0	0	0	0	1	0	0	0	0	0	0	0	0	0	0	0	0	0	0	0	0	0	0	0	0	0	0	0	0	0	0	0	0	0	3	0	0	0	8.92316	8.92316	8.92316	8.92316	8.92316	8.92316	9.49805	8.92316	8.92316
chr10:120925767-120933709-	0	0	0	0	0	2	0	0	0	0	0	0	0	0	0	0	0	0	0	1	0	0	0	0	1	0	0	0	0	0	0	1	0	0	0	0	1	0	0	0	8.92316	8.92316	8.92316	8.92316	8.92316	9.98893	8.92316	8.92316	8.92316
chr10:120931042-120949363-	0	0	0	0	0	0	0	0	0	0	0	0	0	0	0	0	0	0	0	0	0	0	0	0	0	0	0	0	0	0	0	0	0	0	0	0	0	2	0	0	8.92316	8.92316	8.92316	8.92316	8.92316	8.92316	8.92316	8.92316	8.92316
chr10:121082126-121090206+	0	0	0	0	0	0	0	0	0	0	0	0	0	0	0	0	0	0	2	0	0	0	0	0	0	0	0	0	2	0	0	0	0	0	0	0	0	0	0	0	8.92316	8.92316	8.92316	8.92316	8.92316	8.92316	8.92316	8.92316	8.92316
chr10:121294589-121306883-	0	0	0	0	0	0	0	0	0	0	0	0	0	0	0	0	0	0	0	0	0	0	0	0	0	0	0	0	0	0	0	0	0	0	0	2	0	0	0	0	8.92316	8.92316	8.92316	8.92316	8.92316	8.92316	8.92316	8.92316	8.92316
chr10:121371144-121376734+	0	0	0	0	0	0	0	0	0	0	0	0	0	0	0	0	0	1	0	0	0	0	0	0	0	0	2	0	0	1	0	0	0	0	0	0	0	0	0	0	8.92316	8.92316	8.92316	8.92316	8.92316	8.92316	8.92316	8.92316	8.92316
chr10:121374358-121392841+	0	0	0	0	2	0	0	0	0	0	0	0	0	0	0	0	0	0	0	0	0	0	0	0	0	0	0	0	0	0	0	0	0	0	0	0	0	0	0	0	8.92316	8.92316	8.92316	8.92316	9.89321	8.92316	8.92316	8.92316	8.92316
chr10:121376208-121392841+	0	0	0	0	0	0	0	0	0	0	0	0	0	0	0	0	0	0	0	0	0	0	2	0	1	0	0	0	0	0	0	0	0	0	0	0	0	0	0	0	8.92316	8.92316	8.92316	8.92316	8.92316	8.92316	8.92316	8.92316	8.92316
chr10:121395826-121396986+	0	0	0	2	0	0	0	0	0	0	0	0	0	0	0	0	0	0	0	0	0	0	0	0	0	0	0	0	0	0	0	0	0	0	0	0	0	0	0	0	8.92316	8.92316	8.92316	9.88598	8.92316	8.92316	8.92316	8.92316	8.92316
chr10:121410905-121411660-	2	0	0	0	0	0	0	0	0	0	0	0	0	0	0	0	0	0	0	0	0	0	0	0	0	0	0	0	0	0	0	0	0	0	0	0	0	0	0	0	9.7694	8.92316	8.92316	8.92316	8.92316	8.92316	8.92316	8.92316	8.92316
chr10:121412954-121417192-	0	0	0	0	0	0	0	0	0	0	0	0	0	0	0	0	0	0	0	0	2	0	0	0	0	0	0	0	0	0	0	0	0	0	0	0	0	0	0	0	8.92316	8.92316	8.92316	8.92316	8.92316	8.92316	8.92316	8.92316	8.92316
chr10:121552200-121553068-	0	0	0	0	0	0	0	0	0	0	0	0	0	0	0	0	0	0	0	0	0	2	0	0	0	0	0	0	0	0	0	0	0	0	0	0	0	0	0	0	8.92316	8.92316	8.92316	8.92316	8.92316	8.92316	8.92316	8.92316	8.92316
chr10:121611476-121613671-	0	0	0	0	0	0	0	0	2	0	0	0	0	0	0	0	0	0	0	0	0	0	0	0	0	0	0	0	0	0	0	0	0	0	0	0	0	0	0	0	8.92316	8.92316	8.92316	8.92316	8.92316	8.92316	8.92316	8.92316	9.90366
chr10:121800825-121825694-	0	0	0	0	0	0	0	0	0	0	0	0	0	0	0	0	0	0	0	0	0	0	0	0	0	0	0	0	0	0	0	0	0	0	0	0	0	0	3	0	8.92316	8.92316	8.92316	8.92316	8.92316	8.92316	8.92316	8.92316	8.92316
chr10:121823037-121831912-	1	1	0	1	1	0	0	0	0	0	1	0	0	1	0	0	1	0	0	0	0	0	0	0	0	0	0	0	0	0	0	0	2	0	0	0	0	0	0	2	9.40746	9.47834	8.92316	9.48344	9.48822	8.92316	8.92316	8.92316	8.92316
chr10:121823037-121855526-	0	0	0	0	0	0	0	0	0	0	0	0	0	0	0	0	0	0	0	2	0	0	0	0	0	0	0	0	0	0	0	0	0	0	0	0	0	0	0	0	8.92316	8.92316	8.92316	8.92316	8.92316	8.92316	8.92316	8.92316	8.92316
chr10:121869717-121870510-	1	0	0	2	0	0	0	1	0	0	1	0	0	0	0	0	0	1	0	1	1	1	0	1	0	1	0	0	0	0	0	1	0	2	0	0	0	0	0	0	9.40746	8.92316	8.92316	9.88598	8.92316	8.92316	8.92316	9.53126	8.92316
chr10:121869717-121931509-	0	1	0	0	0	0	0	0	0	0	0	0	0	0	0	0	0	0	0	0	0	0	0	1	1	0	0	1	3	0	0	0	0	0	0	0	0	0	0	0	8.92316	9.47834	8.92316	8.92316	8.92316	8.92316	8.92316	8.92316	8.92316
chr10:121925816-121931509-	7	7	3	3	4	2	6	6	8	1	1	1	4	0	0	6	3	11	0	4	2	5	6	8	0	3	4	1	5	1	7	1	4	5	6	2	5	1	8	1	10.8462	11.0226	10.209	10.2004	10.468	9.98893	10.9004	10.9747	11.2138
chr10:122686415-122687195+	0	0	0	0	0	0	0	0	0	0	0	0	0	0	0	0	0	0	0	0	0	0	0	2	0	0	0	0	0	0	0	0	0	0	0	0	0	0	0	0	8.92316	8.92316	8.92316	8.92316	8.92316	8.92316	8.92316	8.92316	8.92316
chr10:122728391-122731569+	0	0	0	0	0	0	0	0	0	0	0	0	0	0	0	0	0	0	0	0	0	0	0	0	0	0	0	0	0	0	2	0	2	0	0	0	0	0	0	0	8.92316	8.92316	8.92316	8.92316	8.92316	8.92316	8.92316	8.92316	8.92316
chr10:122878509-122907614+	0	2	0	0	0	0	0	0	0	0	0	0	0	0	0	0	0	0	0	0	0	0	0	0	0	0	0	0	0	0	0	0	0	0	0	0	0	0	0	0	8.92316	9.87826	8.92316	8.92316	8.92316	8.92316	8.92316	8.92316	8.92316
chr10:122904092-122920845+	2	0	0	0	1	0	0	0	0	0	0	0	0	0	0	0	0	0	0	0	0	2	0	3	0	0	0	0	0	1	1	0	1	0	0	0	0	0	0	0	9.7694	8.92316	8.92316	8.92316	9.48822	8.92316	8.92316	8.92316	8.92316
chr10:123002696-123034458-	0	0	0	0	0	0	0	0	0	0	0	0	0	0	0	0	0	0	0	0	0	0	0	2	0	0	1	0	0	0	0	0	0	0	0	0	0	0	0	0	8.92316	8.92316	8.92316	8.92316	8.92316	8.92316	8.92316	8.92316	8.92316
chr10:123038461-123046427-	0	0	0	0	0	0	0	0	0	0	0	0	0	0	0	0	0	0	0	0	0	0	0	0	0	0	0	0	2	0	0	0	0	0	0	0	0	0	0	0	8.92316	8.92316	8.92316	8.92316	8.92316	8.92316	8.92316	8.92316	8.92316
chr10:123038461-123052312-	0	0	0	0	0	0	0	0	0	0	0	0	0	0	0	0	0	0	0	0	0	2	0	0	0	0	0	0	0	0	0	0	0	0	0	0	0	0	0	0	8.92316	8.92316	8.92316	8.92316	8.92316	8.92316	8.92316	8.92316	8.92316
chr10:123119109-123153127-	0	0	0	0	0	0	0	0	0	0	0	0	2	0	0	0	0	0	0	0	0	0	0	0	0	0	0	0	0	0	0	0	0	0	0	0	0	0	0	0	8.92316	8.92316	8.92316	8.92316	8.92316	8.92316	8.92316	8.92316	8.92316
chr10:123130941-123133129-	0	0	0	0	0	0	0	0	0	0	0	0	0	0	0	0	0	0	0	0	0	0	0	0	0	0	0	0	1	0	0	0	0	0	0	0	2	0	0	1	8.92316	8.92316	8.92316	8.92316	8.92316	8.92316	8.92316	8.92316	8.92316
chr10:123130941-123146938-	0	2	0	0	0	0	0	0	0	0	1	1	0	2	0	0	0	0	0	0	0	0	0	0	0	0	0	1	0	0	0	0	0	0	0	0	0	0	0	0	8.92316	9.87826	8.92316	8.92316	8.92316	8.92316	8.92316	8.92316	8.92316
chr10:123130941-123163654-	2	0	0	0	0	0	0	0	0	0	0	0	0	0	0	0	0	0	0	0	0	0	0	0	0	0	0	0	0	0	0	0	0	0	0	0	0	0	0	0	9.7694	8.92316	8.92316	8.92316	8.92316	8.92316	8.92316	8.92316	8.92316
chr10:123146794-123153127-	0	0	0	0	0	0	0	0	0	0	0	0	0	0	0	0	0	0	0	0	0	0	0	0	0	0	4	0	0	1	0	0	0	0	1	0	0	0	2	0	8.92316	8.92316	8.92316	8.92316	8.92316	8.92316	8.92316	8.92316	8.92316
chr10:123146794-123181800-	0	0	0	0	0	0	0	0	1	0	1	0	0	0	0	0	0	0	0	0	0	2	1	0	0	0	0	0	1	0	0	0	0	0	0	0	1	1	0	0	8.92316	8.92316	8.92316	8.92316	8.92316	8.92316	8.92316	8.92316	9.49515
chr10:123168227-123181800-	0	0	0	0	0	0	0	0	0	0	0	1	0	1	0	2	1	0	0	0	0	1	0	0	0	0	0	0	0	2	0	1	0	0	0	0	0	0	0	1	8.92316	8.92316	8.92316	8.92316	8.92316	8.92316	8.92316	8.92316	8.92316
chr10:125294595-125302081-	4	0	0	0	1	0	0	0	0	0	0	0	0	0	0	1	1	0	0	2	2	0	0	0	0	0	0	0	0	0	0	1	0	0	0	0	0	0	0	0	10.2992	8.92316	8.92316	8.92316	9.48822	8.92316	8.92316	8.92316	8.92316
chr10:125905696-125917918-	0	0	0	0	0	0	0	0	0	0	0	0	0	0	0	0	0	0	2	0	0	0	0	0	0	0	0	0	0	0	0	0	0	0	0	0	0	0	0	0	8.92316	8.92316	8.92316	8.92316	8.92316	8.92316	8.92316	8.92316	8.92316
chr10:125905717-125918860-	0	0	0	0	0	0	0	0	2	0	0	0	0	0	0	0	0	0	0	0	0	0	0	0	0	0	0	0	0	0	0	0	0	0	0	0	0	0	0	0	8.92316	8.92316	8.92316	8.92316	8.92316	8.92316	8.92316	8.92316	9.90366
chr10:125972121-125972467+	0	0	0	1	0	0	0	3	0	0	1	0	0	0	0	0	0	0	0	1	0	2	0	0	0	0	0	0	1	0	0	2	0	1	0	0	0	0	0	1	8.92316	8.92316	8.92316	9.48344	8.92316	8.92316	8.92316	10.2865	8.92316
chr10:126898887-126899626-	0	0	0	0	0	0	0	0	0	0	0	0	0	0	0	0	0	0	0	0	0	0	0	0	0	0	0	0	0	0	0	0	0	0	2	0	0	0	0	0	8.92316	8.92316	8.92316	8.92316	8.92316	8.92316	8.92316	8.92316	8.92316
chr10:126991531-126993908+	0	0	0	0	0	0	0	1	0	0	0	0	0	0	0	0	0	0	0	0	0	0	0	0	0	0	0	0	0	2	0	0	0	0	0	0	0	0	0	0	8.92316	8.92316	8.92316	8.92316	8.92316	8.92316	8.92316	9.53126	8.92316
chr10:127200094-127200352+	0	0	0	0	0	0	0	0	0	0	0	0	0	0	0	0	0	0	0	0	0	0	0	0	0	2	0	0	0	0	0	0	0	0	0	0	0	0	0	0	8.92316	8.92316	8.92316	8.92316	8.92316	8.92316	8.92316	8.92316	8.92316
chr10:127205675-127208967-	0	0	0	0	0	0	0	0	0	0	2	0	0	0	0	0	0	0	0	0	0	0	0	0	0	0	0	0	0	0	0	0	0	0	0	1	0	0	0	0	8.92316	8.92316	8.92316	8.92316	8.92316	8.92316	8.92316	8.92316	8.92316
chr10:127290776-127295055-	0	0	0	0	0	0	0	0	0	0	0	0	0	0	2	0	0	0	0	0	0	0	0	0	0	0	0	0	0	0	0	0	0	0	0	0	0	0	0	0	8.92316	8.92316	8.92316	8.92316	8.92316	8.92316	8.92316	8.92316	8.92316
chr10:127390311-127400193+	0	0	1	0	0	0	0	0	0	0	0	0	0	0	0	0	0	0	0	0	0	0	0	0	0	0	0	0	0	0	0	0	0	0	0	0	4	0	2	0	8.92316	8.92316	9.48818	8.92316	8.92316	8.92316	8.92316	8.92316	8.92316
chr10:127390311-127444475+	0	0	0	0	0	0	0	0	0	0	0	0	0	0	0	0	0	0	0	0	0	0	0	0	0	0	0	0	0	0	0	0	0	0	0	4	0	0	0	0	8.92316	8.92316	8.92316	8.92316	8.92316	8.92316	8.92316	8.92316	8.92316
chr10:127451992-127454756+	0	0	0	0	0	0	0	0	0	0	0	0	0	0	0	0	0	0	0	2	0	0	0	0	0	0	0	0	0	0	0	0	0	0	0	0	0	0	0	0	8.92316	8.92316	8.92316	8.92316	8.92316	8.92316	8.92316	8.92316	8.92316
chr10:127476520-127485570+	0	0	0	0	0	0	0	0	0	0	0	0	0	0	0	0	0	0	0	0	0	0	0	0	0	0	1	0	0	2	0	0	0	0	0	0	0	0	0	0	8.92316	8.92316	8.92316	8.92316	8.92316	8.92316	8.92316	8.92316	8.92316
chr10:127483976-127485570+	0	0	0	0	0	0	1	0	0	0	0	0	2	0	0	0	0	0	0	0	0	0	0	0	0	0	0	0	0	0	0	0	0	0	0	0	0	0	0	0	8.92316	8.92316	8.92316	8.92316	8.92316	8.92316	9.49805	8.92316	8.92316
chr10:127589555-127590615-	0	2	0	0	0	0	0	0	0	0	0	0	0	0	0	0	0	0	0	0	0	0	0	0	0	0	0	0	0	0	0	0	0	0	0	0	0	0	0	0	8.92316	9.87826	8.92316	8.92316	8.92316	8.92316	8.92316	8.92316	8.92316
chr10:127605409-127668555-	0	0	0	0	0	0	0	0	0	0	0	0	0	0	0	0	0	0	0	0	0	0	0	0	0	0	0	0	0	0	0	0	0	0	0	0	0	0	2	0	8.92316	8.92316	8.92316	8.92316	8.92316	8.92316	8.92316	8.92316	8.92316
chr10:127646891-127648189+	0	1	1	2	0	0	0	0	1	1	3	0	0	1	0	1	0	0	1	0	1	0	0	0	2	0	0	0	0	0	0	0	0	1	0	2	0	0	0	2	8.92316	9.47834	9.48818	9.88598	8.92316	8.92316	8.92316	8.92316	9.49515
chr10:127653207-127655018+	0	0	0	0	0	0	0	0	0	0	0	0	0	0	0	0	0	0	0	0	0	0	0	0	0	0	0	0	0	0	0	0	0	0	2	0	0	0	0	0	8.92316	8.92316	8.92316	8.92316	8.92316	8.92316	8.92316	8.92316	8.92316
chr10:127655353-127657723+	0	0	0	0	0	0	0	0	0	0	0	0	0	0	0	0	0	0	0	0	0	0	0	0	0	0	0	0	0	0	0	0	0	0	0	3	0	0	0	0	8.92316	8.92316	8.92316	8.92316	8.92316	8.92316	8.92316	8.92316	8.92316
chr10:127705472-127712627+	0	0	0	0	0	0	0	0	0	0	0	2	0	0	0	0	0	0	0	0	0	0	0	0	0	0	0	0	0	0	0	0	0	0	0	0	0	0	0	0	8.92316	8.92316	8.92316	8.92316	8.92316	8.92316	8.92316	8.92316	8.92316
chr10:127705511-127706875+	0	0	0	0	0	0	0	0	0	0	0	0	0	0	0	0	0	0	0	0	0	0	0	0	0	0	0	0	0	0	2	0	0	0	0	0	0	0	0	0	8.92316	8.92316	8.92316	8.92316	8.92316	8.92316	8.92316	8.92316	8.92316
chr10:127791903-127792301+	0	0	0	0	0	0	2	0	0	0	0	0	0	0	0	0	0	0	0	0	0	0	0	0	0	0	0	0	0	0	0	0	0	0	0	0	0	0	0	0	8.92316	8.92316	8.92316	8.92316	8.92316	8.92316	9.90803	8.92316	8.92316
chr10:128068672-128070232+	0	0	1	0	0	0	0	0	0	0	0	0	2	0	0	0	0	0	0	0	0	0	0	0	0	0	0	0	0	0	0	0	0	0	0	0	0	0	0	0	8.92316	8.92316	9.48818	8.92316	8.92316	8.92316	8.92316	8.92316	8.92316
chr10:128121941-128123119+	0	0	0	0	0	0	0	0	0	0	0	0	0	0	0	0	0	0	0	0	0	0	0	0	0	2	0	0	0	0	0	0	0	0	0	0	0	0	0	0	8.92316	8.92316	8.92316	8.92316	8.92316	8.92316	8.92316	8.92316	8.92316
chr10:128130080-128130410-	0	2	0	0	0	0	0	0	0	0	0	0	0	0	0	0	0	0	0	0	0	0	0	0	0	0	0	0	0	0	0	0	0	0	0	0	0	0	0	0	8.92316	9.87826	8.92316	8.92316	8.92316	8.92316	8.92316	8.92316	8.92316
chr10:128146810-128147231-	0	0	0	0	0	0	0	0	0	0	0	0	0	0	0	0	2	0	0	0	0	0	0	0	0	0	0	0	0	0	0	0	0	0	0	0	0	0	0	0	8.92316	8.92316	8.92316	8.92316	8.92316	8.92316	8.92316	8.92316	8.92316
chr10:128276486-128278817+	0	0	0	0	0	0	0	0	0	0	0	0	0	0	0	0	0	0	0	0	0	0	0	0	0	1	0	0	0	0	0	0	0	1	0	0	1	0	0	4	8.92316	8.92316	8.92316	8.92316	8.92316	8.92316	8.92316	8.92316	8.92316
chr10:128277644-128278817+	0	0	0	0	2	0	1	0	0	0	0	0	0	1	0	0	0	0	0	0	0	0	0	0	0	0	0	0	0	0	0	0	0	0	0	0	0	0	0	0	8.92316	8.92316	8.92316	8.92316	9.89321	8.92316	9.49805	8.92316	8.92316
chr10:128358334-128358533+	0	0	0	0	0	0	0	0	1	0	0	0	0	0	0	0	0	0	0	0	0	0	1	0	3	0	0	0	0	0	0	0	0	2	0	0	0	0	0	0	8.92316	8.92316	8.92316	8.92316	8.92316	8.92316	8.92316	8.92316	9.49515
chr10:128468795-128469789+	3	0	0	1	1	0	0	2	1	0	2	0	0	1	0	0	0	0	0	1	2	1	0	0	0	0	0	0	0	0	0	0	0	1	0	1	1	0	0	1	10.0585	8.92316	8.92316	9.48344	9.48822	8.92316	8.92316	9.95773	9.49515
chr10:128468795-128475064+	0	0	0	0	0	0	0	0	0	0	0	0	0	0	0	0	0	0	0	0	0	0	0	0	0	0	0	0	0	0	2	0	0	0	0	0	0	0	0	0	8.92316	8.92316	8.92316	8.92316	8.92316	8.92316	8.92316	8.92316	8.92316
chr10:128469820-128470034+	0	0	1	3	0	0	0	0	0	0	0	0	0	0	0	0	0	0	0	0	0	0	0	0	0	0	0	0	0	0	0	0	0	0	0	0	0	0	0	0	8.92316	8.92316	9.48818	10.2004	8.92316	8.92316	8.92316	8.92316	8.92316
chr10:128470443-128474054+	0	2	0	0	0	0	0	0	0	0	0	0	0	0	0	0	0	0	0	0	0	0	0	0	0	0	0	0	0	0	0	0	0	0	0	0	0	0	0	0	8.92316	9.87826	8.92316	8.92316	8.92316	8.92316	8.92316	8.92316	8.92316
chr10:128480763-128480950+	0	0	2	0	0	0	0	0	0	0	0	0	0	0	0	0	0	0	0	0	0	0	0	0	0	0	0	0	0	0	0	0	0	0	0	0	0	0	0	0	8.92316	8.92316	9.89315	8.92316	8.92316	8.92316	8.92316	8.92316	8.92316
chr10:128490916-128492316-	0	0	0	0	0	0	0	0	0	0	0	0	0	0	0	0	0	0	0	0	0	0	0	0	0	0	0	0	0	0	0	0	0	0	2	0	0	0	0	0	8.92316	8.92316	8.92316	8.92316	8.92316	8.92316	8.92316	8.92316	8.92316
chr10:128491740-128492128-	0	0	0	0	0	0	0	0	0	0	0	0	0	0	0	0	0	0	0	0	0	3	0	0	0	0	0	0	0	0	0	0	0	0	0	0	0	0	0	0	8.92316	8.92316	8.92316	8.92316	8.92316	8.92316	8.92316	8.92316	8.92316
chr10:128492608-128496360-	0	0	0	0	0	0	0	0	0	0	0	0	0	0	1	0	0	0	0	0	0	0	0	0	0	0	0	0	0	0	0	0	0	0	0	0	0	0	2	0	8.92316	8.92316	8.92316	8.92316	8.92316	8.92316	8.92316	8.92316	8.92316
chr10:128575982-128579092-	0	0	0	0	0	0	0	0	0	0	0	0	0	0	0	0	0	0	0	0	0	0	0	0	0	0	0	0	0	0	0	0	0	0	2	0	0	0	0	0	8.92316	8.92316	8.92316	8.92316	8.92316	8.92316	8.92316	8.92316	8.92316
chr10:128578100-128579092-	0	1	1	1	0	0	0	0	0	0	0	0	0	0	0	0	0	0	0	2	1	1	1	0	2	0	0	0	0	0	1	0	1	0	0	0	0	0	0	1	8.92316	9.47834	9.48818	9.48344	8.92316	8.92316	8.92316	8.92316	8.92316
chr10:128579496-128582103-	0	0	0	0	0	1	0	1	0	0	0	0	0	0	0	0	0	0	0	0	0	0	2	0	1	0	0	0	0	0	0	0	0	0	0	0	0	0	0	0	8.92316	8.92316	8.92316	8.92316	8.92316	9.5523	8.92316	9.53126	8.92316
chr10:128681386-128683346-	0	0	0	0	0	2	0	1	0	2	0	0	0	0	0	0	0	0	0	0	0	0	0	0	0	0	0	0	0	0	0	0	0	0	0	0	0	0	0	0	8.92316	8.92316	8.92316	8.92316	8.92316	9.98893	8.92316	9.53126	8.92316
chr10:128698714-128704833-	0	0	0	0	0	0	0	0	0	0	0	2	0	0	0	0	0	0	0	0	0	0	0	0	0	0	0	0	0	0	0	0	0	0	0	0	0	0	0	0	8.92316	8.92316	8.92316	8.92316	8.92316	8.92316	8.92316	8.92316	8.92316
chr10:128728068-128728341-	0	0	0	0	0	0	0	0	0	0	0	0	0	0	0	0	0	2	0	0	0	0	0	0	0	0	0	0	0	0	0	0	0	0	0	0	0	0	0	0	8.92316	8.92316	8.92316	8.92316	8.92316	8.92316	8.92316	8.92316	8.92316
chr10:128814038-128814685+	0	0	0	0	0	0	0	0	0	0	0	0	0	0	0	0	0	0	0	0	0	2	0	0	0	0	0	0	0	0	0	0	0	0	0	0	0	0	0	0	8.92316	8.92316	8.92316	8.92316	8.92316	8.92316	8.92316	8.92316	8.92316
chr10:128909929-128911493+	0	1	0	0	0	0	0	0	0	0	0	3	0	0	0	0	0	0	0	0	0	0	0	0	0	0	0	0	0	0	0	0	0	0	0	0	0	0	0	0	8.92316	9.47834	8.92316	8.92316	8.92316	8.92316	8.92316	8.92316	8.92316
chr10:128910735-128910918+	0	0	0	0	0	0	0	0	0	0	0	0	0	0	0	0	0	0	0	0	0	0	0	0	0	0	0	0	0	2	0	0	0	0	0	0	0	0	0	0	8.92316	8.92316	8.92316	8.92316	8.92316	8.92316	8.92316	8.92316	8.92316
chr11:3132216-3193904-	0	0	0	0	0	0	0	0	0	0	0	0	0	0	0	0	0	0	0	0	0	0	0	2	0	0	0	0	0	0	0	0	0	0	0	0	0	0	0	0	8.92316	8.92316	8.92316	8.92316	8.92316	8.92316	8.92316	8.92316	8.92316
chr11:3140137-3146292-	0	0	0	0	0	0	0	2	0	0	0	0	0	0	0	0	0	0	0	0	0	0	0	0	2	0	0	0	0	0	0	0	0	0	0	0	0	0	0	0	8.92316	8.92316	8.92316	8.92316	8.92316	8.92316	8.92316	9.95773	8.92316
chr11:3142308-3146292-	0	0	0	0	0	0	0	0	0	0	0	0	0	0	0	0	0	0	0	0	0	0	0	0	0	0	0	0	0	0	0	0	0	0	0	0	1	0	3	1	8.92316	8.92316	8.92316	8.92316	8.92316	8.92316	8.92316	8.92316	8.92316
chr11:3155399-3170704-	0	0	0	0	0	0	0	0	0	0	0	0	0	0	0	0	2	0	0	0	0	0	0	0	0	0	0	0	0	0	0	0	0	0	0	0	0	0	0	0	8.92316	8.92316	8.92316	8.92316	8.92316	8.92316	8.92316	8.92316	8.92316
chr11:3170587-3177521-	0	0	0	0	0	0	0	0	2	0	0	0	0	0	0	0	0	0	0	0	0	0	0	0	0	0	0	0	0	0	0	0	0	0	0	0	0	0	0	0	8.92316	8.92316	8.92316	8.92316	8.92316	8.92316	8.92316	8.92316	9.90366
chr11:3203630-3230101+	0	0	0	0	0	0	0	1	0	0	0	0	0	0	0	0	0	0	1	0	0	0	0	0	0	0	0	0	2	0	0	0	0	0	0	0	0	0	0	0	8.92316	8.92316	8.92316	8.92316	8.92316	8.92316	8.92316	9.53126	8.92316
chr11:3221093-3230101+	0	0	0	0	0	0	0	0	0	0	0	2	0	0	0	0	0	0	0	0	0	0	0	0	0	0	0	0	0	0	0	0	0	0	0	0	0	0	0	0	8.92316	8.92316	8.92316	8.92316	8.92316	8.92316	8.92316	8.92316	8.92316
chr11:3221093-3242718+	0	0	0	0	0	2	0	0	0	0	0	0	0	0	0	0	0	0	0	0	0	0	0	0	0	0	0	0	0	0	0	0	0	0	0	0	0	0	0	0	8.92316	8.92316	8.92316	8.92316	8.92316	9.98893	8.92316	8.92316	8.92316
chr11:3240895-3242718+	0	1	0	0	0	0	0	0	0	0	0	0	0	0	0	2	1	0	0	0	0	0	0	0	0	0	0	0	0	0	0	0	0	0	0	1	0	0	0	0	8.92316	9.47834	8.92316	8.92316	8.92316	8.92316	8.92316	8.92316	8.92316
chr11:3259306-3264890-	0	0	0	0	0	0	0	0	0	0	0	0	2	0	0	0	0	0	0	0	0	0	0	0	0	0	0	0	0	0	0	0	0	0	0	0	0	0	0	0	8.92316	8.92316	8.92316	8.92316	8.92316	8.92316	8.92316	8.92316	8.92316
chr11:3262489-3264890-	0	0	0	0	0	0	0	2	0	0	0	0	0	0	5	0	0	0	0	0	0	0	0	1	1	0	0	0	0	0	0	0	0	0	0	1	0	0	0	0	8.92316	8.92316	8.92316	8.92316	8.92316	8.92316	8.92316	9.95773	8.92316
chr11:3403773-3403991-	0	0	0	0	0	0	0	0	0	0	0	0	0	0	0	0	0	0	0	0	2	0	0	0	0	0	0	0	0	0	0	0	0	0	0	0	0	0	0	0	8.92316	8.92316	8.92316	8.92316	8.92316	8.92316	8.92316	8.92316	8.92316
chr11:3425282-3432620-	2	0	0	0	0	0	0	0	0	0	0	0	0	0	0	0	0	0	0	0	0	0	0	0	0	0	0	0	0	0	0	0	0	0	0	0	0	0	0	0	9.7694	8.92316	8.92316	8.92316	8.92316	8.92316	8.92316	8.92316	8.92316
chr11:3456792-3457957-	0	0	0	0	0	0	0	0	0	0	0	2	0	0	0	0	0	0	0	0	0	0	0	0	0	0	0	0	0	0	0	0	0	0	0	0	0	0	0	0	8.92316	8.92316	8.92316	8.92316	8.92316	8.92316	8.92316	8.92316	8.92316
chr11:3502694-3504734-	0	0	0	0	0	0	0	0	0	0	0	0	0	0	0	0	0	0	0	0	0	0	0	0	0	0	0	0	0	0	0	0	0	0	0	0	0	0	2	0	8.92316	8.92316	8.92316	8.92316	8.92316	8.92316	8.92316	8.92316	8.92316
chr11:3517756-3520916-	1	3	0	0	1	0	2	0	1	2	1	1	5	5	11	1	0	1	0	0	1	0	2	0	4	0	0	0	1	5	2	1	1	3	0	5	1	0	0	0	9.40746	10.191	8.92316	8.92316	9.48822	8.92316	9.90803	8.92316	9.49515
chr11:3647103-3648125-	0	0	0	0	0	0	0	0	0	0	0	0	0	0	0	0	0	0	0	0	0	2	0	0	0	0	0	0	0	0	0	0	0	0	0	0	0	0	0	0	8.92316	8.92316	8.92316	8.92316	8.92316	8.92316	8.92316	8.92316	8.92316
chr11:4408590-4435089-	0	0	0	0	0	0	0	0	0	0	0	0	0	0	0	0	0	0	0	0	0	0	0	2	0	0	0	0	0	0	0	0	0	0	0	0	0	0	0	0	8.92316	8.92316	8.92316	8.92316	8.92316	8.92316	8.92316	8.92316	8.92316
chr11:4504032-4531305-	0	0	0	0	0	0	0	0	1	2	0	0	0	0	0	0	0	0	0	0	0	2	0	0	0	0	0	0	0	0	0	0	0	0	0	0	0	0	0	0	8.92316	8.92316	8.92316	8.92316	8.92316	8.92316	8.92316	8.92316	9.49515
chr11:4517741-4531305-	5	0	1	1	1	0	1	2	0	1	1	8	4	0	0	0	3	1	0	1	5	2	4	2	1	1	2	0	0	3	2	2	1	1	6	1	1	0	0	5	10.5055	8.92316	9.48818	9.48344	9.48822	8.92316	9.49805	9.95773	8.92316
chr11:4517741-4546268-	0	0	2	0	0	0	0	0	2	0	0	0	4	3	0	1	2	2	0	0	0	0	0	0	0	2	1	0	0	2	2	0	0	0	0	0	0	0	0	0	8.92316	8.92316	9.89315	8.92316	8.92316	8.92316	8.92316	8.92316	9.90366
chr11:4527836-4531305-	5	0	1	1	1	0	0	0	0	0	0	0	0	0	0	0	0	0	1	0	0	0	0	0	0	0	0	0	1	1	0	0	0	0	0	1	0	0	0	0	10.5055	8.92316	9.48818	9.48344	9.48822	8.92316	8.92316	8.92316	8.92316
chr11:4527836-4546265-	0	0	0	0	0	0	0	0	0	0	0	0	0	0	0	0	0	0	0	0	0	0	0	0	0	0	0	0	0	0	0	0	0	0	2	0	0	0	0	0	8.92316	8.92316	8.92316	8.92316	8.92316	8.92316	8.92316	8.92316	8.92316
chr11:4640383-4649869+	0	0	0	0	0	0	0	0	0	2	1	0	0	0	3	0	0	1	0	0	0	0	0	2	3	0	0	0	0	0	0	0	0	0	0	0	0	1	0	0	8.92316	8.92316	8.92316	8.92316	8.92316	8.92316	8.92316	8.92316	8.92316
chr11:4640383-4659384+	0	0	0	0	0	0	0	0	0	0	0	0	0	0	0	0	0	0	0	0	0	0	0	0	0	0	1	0	0	0	0	0	0	0	0	0	1	0	0	3	8.92316	8.92316	8.92316	8.92316	8.92316	8.92316	8.92316	8.92316	8.92316
chr11:4646562-4649869+	0	0	0	0	1	0	0	0	1	0	2	0	0	0	0	0	0	0	0	0	0	3	0	0	0	0	0	1	5	0	0	0	2	0	1	2	5	0	0	1	8.92316	8.92316	8.92316	8.92316	9.48822	8.92316	8.92316	8.92316	9.49515
chr11:4649740-4659384+	0	0	0	0	0	0	0	0	0	0	0	0	1	0	0	0	3	0	0	0	0	0	0	0	2	1	0	0	0	0	1	0	0	0	0	0	0	0	2	0	8.92316	8.92316	8.92316	8.92316	8.92316	8.92316	8.92316	8.92316	8.92316
chr11:4656269-4659384+	0	0	0	0	0	0	0	0	0	0	0	0	0	0	0	0	0	2	0	0	0	0	0	0	0	0	0	0	0	0	0	0	0	0	0	0	0	0	0	0	8.92316	8.92316	8.92316	8.92316	8.92316	8.92316	8.92316	8.92316	8.92316
chr11:4766330-4849194-	0	2	0	0	0	0	0	0	0	0	0	0	0	0	0	0	0	0	0	0	0	0	0	0	0	0	0	0	0	0	0	0	0	0	0	0	0	0	0	0	8.92316	9.87826	8.92316	8.92316	8.92316	8.92316	8.92316	8.92316	8.92316
chr11:4768078-4784563-	0	0	0	0	0	0	0	0	0	0	0	0	0	0	0	0	0	0	0	0	0	0	0	0	0	0	0	2	1	0	0	0	0	0	0	1	0	0	0	0	8.92316	8.92316	8.92316	8.92316	8.92316	8.92316	8.92316	8.92316	8.92316
chr11:4780563-4784563-	0	0	0	0	0	0	0	0	0	0	0	0	0	0	0	0	3	0	0	0	0	0	0	0	0	0	0	0	0	0	0	0	0	0	0	0	0	0	0	0	8.92316	8.92316	8.92316	8.92316	8.92316	8.92316	8.92316	8.92316	8.92316
chr11:4799861-4806336-	0	0	0	0	0	0	0	0	0	0	0	0	0	0	0	0	0	0	0	0	0	0	0	0	0	0	0	0	0	0	0	0	0	0	0	0	2	0	0	1	8.92316	8.92316	8.92316	8.92316	8.92316	8.92316	8.92316	8.92316	8.92316
chr11:4799861-4820493-	0	0	0	0	1	0	0	0	0	0	0	0	0	0	0	0	0	0	0	0	0	0	0	0	0	0	0	1	2	0	0	0	0	1	0	0	0	0	0	0	8.92316	8.92316	8.92316	8.92316	9.48822	8.92316	8.92316	8.92316	8.92316
chr11:4803678-4816165-	0	0	0	0	0	0	0	0	0	0	0	0	0	0	0	0	0	0	0	0	2	0	0	0	0	0	0	0	0	0	0	0	0	0	0	0	0	0	0	0	8.92316	8.92316	8.92316	8.92316	8.92316	8.92316	8.92316	8.92316	8.92316
chr11:4803678-4820493-	0	0	0	1	0	0	0	0	2	0	0	0	0	1	0	0	0	1	0	0	0	0	0	1	0	1	0	0	0	2	0	1	0	0	0	0	0	0	3	0	8.92316	8.92316	8.92316	9.48344	8.92316	8.92316	8.92316	8.92316	9.90366
chr11:4808257-4820493-	0	0	0	0	1	0	0	0	1	0	0	0	0	0	0	0	1	0	0	1	0	0	0	2	0	0	0	1	1	0	0	0	0	1	0	2	0	0	1	0	8.92316	8.92316	8.92316	8.92316	9.48822	8.92316	8.92316	8.92316	9.49515
chr11:4816082-4820493-	0	0	0	0	0	0	0	0	0	2	0	0	0	0	0	0	1	0	0	0	0	3	0	3	1	0	0	0	0	0	0	0	0	0	0	0	0	1	1	0	8.92316	8.92316	8.92316	8.92316	8.92316	8.92316	8.92316	8.92316	8.92316
chr11:5085896-5086063-	0	0	0	0	3	0	0	0	0	0	0	0	0	0	0	0	0	0	0	0	0	0	0	0	0	0	0	0	0	0	0	0	0	0	0	0	0	0	0	0	8.92316	8.92316	8.92316	8.92316	10.2091	8.92316	8.92316	8.92316	8.92316
chr11:5085896-5091982-	0	0	0	0	0	0	0	0	0	0	0	0	1	0	0	0	0	0	0	0	0	0	0	0	2	0	0	0	0	0	0	0	0	0	0	0	0	0	0	0	8.92316	8.92316	8.92316	8.92316	8.92316	8.92316	8.92316	8.92316	8.92316
chr11:5238411-5243937-	0	0	0	0	0	0	0	0	0	0	0	0	0	0	0	0	0	0	0	0	0	0	0	2	0	0	0	0	0	0	0	0	0	0	0	0	0	0	0	0	8.92316	8.92316	8.92316	8.92316	8.92316	8.92316	8.92316	8.92316	8.92316
chr11:5280808-5338763-	0	0	0	0	0	0	0	0	0	0	0	0	0	0	0	0	0	0	0	0	0	0	0	0	0	3	0	0	0	0	0	0	0	0	0	0	0	0	0	0	8.92316	8.92316	8.92316	8.92316	8.92316	8.92316	8.92316	8.92316	8.92316
chr11:5298059-5298211-	0	0	0	0	0	0	0	0	0	0	0	0	0	0	0	0	0	0	0	2	0	0	0	0	0	0	0	0	0	0	0	0	0	0	0	0	0	0	0	0	8.92316	8.92316	8.92316	8.92316	8.92316	8.92316	8.92316	8.92316	8.92316
chr11:5329879-5338763-	0	0	0	0	0	3	1	0	0	2	0	0	1	1	0	0	1	3	0	1	0	0	0	0	0	2	0	1	0	0	0	1	0	1	0	1	0	0	0	0	8.92316	8.92316	8.92316	8.92316	8.92316	10.3237	9.49805	8.92316	8.92316
chr11:5791792-5794311+	0	0	0	0	0	0	0	0	0	0	0	0	0	0	0	0	0	0	0	2	0	0	0	0	0	0	0	0	0	0	0	0	0	0	0	0	0	0	3	0	8.92316	8.92316	8.92316	8.92316	8.92316	8.92316	8.92316	8.92316	8.92316
chr11:6106611-6106780-	0	0	0	0	0	0	0	0	0	0	0	2	0	0	0	0	0	0	0	0	0	0	0	0	0	0	0	0	0	0	0	0	0	0	0	0	0	0	0	0	8.92316	8.92316	8.92316	8.92316	8.92316	8.92316	8.92316	8.92316	8.92316
chr11:6113243-6125561-	1	0	0	0	0	0	0	0	0	1	0	0	0	0	0	1	0	5	0	0	0	2	1	2	0	1	1	0	0	1	0	0	0	0	0	0	0	0	0	0	9.40746	8.92316	8.92316	8.92316	8.92316	8.92316	8.92316	8.92316	8.92316
chr11:6149876-6150079-	0	0	0	0	0	0	0	0	0	0	0	0	0	0	0	0	1	0	0	0	2	1	0	0	3	0	0	0	0	0	0	0	0	0	0	0	0	0	0	1	8.92316	8.92316	8.92316	8.92316	8.92316	8.92316	8.92316	8.92316	8.92316
chr11:6193154-6193476-	8	7	0	1	7	2	3	2	1	1	1	0	2	2	2	1	3	2	0	0	1	0	2	0	0	4	3	0	1	2	6	1	0	1	2	4	1	6	5	0	10.9905	11.0226	8.92316	9.48344	11.0462	9.98893	10.2269	9.95773	9.49515
chr11:6263939-6264795-	0	0	0	0	0	0	0	1	2	0	0	0	0	0	0	0	0	0	0	0	0	0	0	0	0	0	0	0	0	0	0	0	0	0	0	0	0	0	0	0	8.92316	8.92316	8.92316	8.92316	8.92316	8.92316	8.92316	9.53126	9.90366
chr11:6296952-6316855+	0	0	2	0	0	0	0	0	0	0	0	0	0	0	0	0	0	0	0	0	0	0	0	0	0	0	0	0	0	0	0	0	0	0	0	0	0	0	0	0	8.92316	8.92316	9.89315	8.92316	8.92316	8.92316	8.92316	8.92316	8.92316
chr11:6311009-6313979+	0	0	0	0	0	0	0	0	2	0	0	0	0	0	0	0	0	0	0	0	0	0	1	0	0	0	0	0	0	0	0	0	0	0	0	0	0	0	0	0	8.92316	8.92316	8.92316	8.92316	8.92316	8.92316	8.92316	8.92316	9.90366
chr11:6311009-6317080+	2	1	0	0	2	0	0	1	0	2	1	4	0	1	1	0	0	0	0	0	0	0	0	1	0	0	2	0	0	0	0	0	0	0	0	0	0	5	0	0	9.7694	9.47834	8.92316	8.92316	9.89321	8.92316	8.92316	9.53126	8.92316
chr11:6313788-6316855+	0	0	0	0	0	0	0	0	1	0	0	0	0	0	0	0	0	0	0	0	0	0	0	0	0	0	0	0	0	2	1	0	0	0	1	2	0	0	0	0	8.92316	8.92316	8.92316	8.92316	8.92316	8.92316	8.92316	8.92316	9.49515
chr11:6313788-6317080+	5	5	1	8	3	2	4	2	17	5	1	0	3	4	5	3	5	1	10	3	7	3	3	7	5	0	2	5	0	5	6	2	2	5	0	4	0	4	7	4	10.5055	10.6659	9.48818	11.1851	10.2091	9.98893	10.4879	9.95773	12.136
chr11:6338558-6339928+	2	0	0	0	0	0	0	0	0	0	0	0	0	0	0	0	0	0	0	1	0	0	0	0	1	0	0	0	0	0	0	0	0	0	0	0	0	0	0	0	9.7694	8.92316	8.92316	8.92316	8.92316	8.92316	8.92316	8.92316	8.92316
chr11:6433724-6439453-	0	2	0	0	0	0	0	0	0	0	0	0	0	0	0	0	0	0	0	0	0	0	0	0	0	0	0	0	0	0	0	0	0	0	0	0	0	0	0	0	8.92316	9.87826	8.92316	8.92316	8.92316	8.92316	8.92316	8.92316	8.92316
chr11:6437966-6439453-	0	0	0	0	0	0	0	0	0	0	0	0	0	0	0	0	0	0	0	0	0	0	0	2	0	0	0	0	0	0	0	0	0	0	0	0	0	0	0	0	8.92316	8.92316	8.92316	8.92316	8.92316	8.92316	8.92316	8.92316	8.92316
chr11:6584520-6585217+	1	0	0	0	0	0	0	0	0	0	0	0	1	0	0	1	0	0	0	0	0	0	0	0	0	1	0	0	2	0	0	1	0	0	0	0	0	1	0	0	9.40746	8.92316	8.92316	8.92316	8.92316	8.92316	8.92316	8.92316	8.92316
chr11:8432650-8434592-	0	0	0	0	0	0	0	0	0	0	0	0	0	0	0	0	0	0	0	0	0	2	0	0	0	0	0	0	0	0	0	0	0	0	0	0	0	0	0	0	8.92316	8.92316	8.92316	8.92316	8.92316	8.92316	8.92316	8.92316	8.92316
chr11:8478225-8479665-	15	22	6	10	11	4	8	6	13	0	5	3	10	8	4	5	8	7	4	6	20	9	4	6	7	4	5	5	7	1	4	0	11	1	5	7	1	3	5	5	11.7271	12.4247	10.8779	11.4456	11.5725	10.5952	11.2208	10.9747	11.7961
chr11:8478225-8493337-	0	0	0	0	0	0	0	0	0	0	0	0	1	0	0	0	0	0	2	0	0	0	0	0	0	0	0	0	0	0	1	0	3	1	0	0	1	0	0	2	8.92316	8.92316	8.92316	8.92316	8.92316	8.92316	8.92316	8.92316	8.92316
chr11:8478225-8519570-	0	0	0	0	0	0	2	0	0	0	1	1	2	0	0	0	0	1	0	1	0	0	0	0	0	0	0	1	0	0	0	1	0	1	0	0	0	0	0	0	8.92316	8.92316	8.92316	8.92316	8.92316	8.92316	9.90803	8.92316	8.92316
chr11:8492227-8492482-	0	0	0	0	0	0	0	0	0	0	0	1	0	3	0	0	0	0	0	0	0	0	0	0	0	0	0	0	0	0	0	0	0	0	0	0	0	0	0	0	8.92316	8.92316	8.92316	8.92316	8.92316	8.92316	8.92316	8.92316	8.92316
chr11:8518199-8519570-	1	2	1	4	0	2	0	2	4	4	1	5	4	1	1	0	1	3	4	0	2	5	0	2	1	2	4	0	0	3	2	1	1	1	2	5	1	0	0	0	9.40746	9.87826	9.48818	10.4583	8.92316	9.98893	8.92316	9.95773	10.4821
chr11:8518199-8532509-	1	1	1	2	0	0	1	0	0	0	0	0	0	0	0	0	2	0	0	0	0	0	0	1	2	0	0	0	0	0	0	0	1	0	0	0	0	0	0	0	9.40746	9.47834	9.48818	9.88598	8.92316	8.92316	9.49805	8.92316	8.92316
chr11:8518199-8549721-	0	0	0	0	0	0	0	0	0	0	0	0	0	0	0	3	0	0	0	0	0	0	0	0	0	0	0	0	0	0	0	0	0	0	0	0	0	0	0	0	8.92316	8.92316	8.92316	8.92316	8.92316	8.92316	8.92316	8.92316	8.92316
chr11:8518199-8579121-	0	0	0	0	0	0	0	0	0	0	1	0	0	2	0	0	0	0	0	0	0	0	0	0	0	0	0	0	0	0	0	0	0	0	0	0	0	0	0	0	8.92316	8.92316	8.92316	8.92316	8.92316	8.92316	8.92316	8.92316	8.92316
chr11:8626691-8635422-	0	0	0	0	0	0	2	0	0	0	0	0	0	0	0	0	0	0	0	0	0	0	0	0	0	0	0	0	0	0	0	0	0	0	0	0	0	0	0	0	8.92316	8.92316	8.92316	8.92316	8.92316	8.92316	9.90803	8.92316	8.92316
chr11:9010241-9010624-	0	0	0	0	0	0	0	2	0	0	0	0	0	0	0	0	0	0	0	0	0	0	0	0	0	0	0	0	0	0	0	0	0	0	0	0	0	0	0	0	8.92316	8.92316	8.92316	8.92316	8.92316	8.92316	8.92316	9.95773	8.92316
chr11:11700205-11707904+	1	0	0	0	0	0	0	1	0	0	0	0	0	0	0	0	0	0	1	1	0	0	1	1	3	0	0	0	0	0	1	0	0	0	0	0	1	0	0	3	9.40746	8.92316	8.92316	8.92316	8.92316	8.92316	8.92316	9.53126	8.92316
chr11:11748311-11761353+	0	0	0	0	0	0	0	0	0	0	0	0	0	0	0	0	0	3	0	0	0	0	0	0	0	0	0	0	0	0	1	0	1	0	0	0	0	0	0	0	8.92316	8.92316	8.92316	8.92316	8.92316	8.92316	8.92316	8.92316	8.92316
chr11:12031247-12031688-	0	0	0	0	0	0	0	0	0	0	0	0	0	0	0	0	0	0	0	1	3	0	0	0	0	0	0	0	0	0	0	0	0	0	0	0	0	0	0	0	8.92316	8.92316	8.92316	8.92316	8.92316	8.92316	8.92316	8.92316	8.92316
chr11:12309614-12343917-	0	0	0	0	0	0	0	0	0	0	0	0	0	0	0	0	0	0	0	0	0	0	0	0	0	0	0	0	0	0	0	0	0	0	0	0	2	0	0	1	8.92316	8.92316	8.92316	8.92316	8.92316	8.92316	8.92316	8.92316	8.92316
chr11:16782132-16782348+	0	0	0	0	0	0	0	0	0	0	0	0	0	0	0	0	0	0	0	0	0	0	0	0	0	0	0	0	0	0	0	0	0	0	0	0	2	0	0	0	8.92316	8.92316	8.92316	8.92316	8.92316	8.92316	8.92316	8.92316	8.92316
chr11:16858896-16860251+	0	0	0	0	0	0	0	0	0	0	0	0	0	0	0	0	0	0	0	0	0	0	0	0	0	0	0	0	0	0	0	2	0	0	0	0	0	0	0	0	8.92316	8.92316	8.92316	8.92316	8.92316	8.92316	8.92316	8.92316	8.92316
chr11:16881464-16883613+	0	0	0	0	0	0	0	0	0	0	1	0	0	0	2	1	0	0	0	0	2	0	0	0	0	0	0	0	0	0	0	0	0	0	0	0	0	0	1	0	8.92316	8.92316	8.92316	8.92316	8.92316	8.92316	8.92316	8.92316	8.92316
chr11:18758772-18761359+	0	2	0	0	0	0	0	0	0	0	0	0	0	0	0	0	0	0	0	0	0	0	0	0	0	0	0	0	0	0	0	0	0	0	0	0	0	0	0	0	8.92316	9.87826	8.92316	8.92316	8.92316	8.92316	8.92316	8.92316	8.92316
chr11:19998120-20008477+	10	4	7	2	4	2	2	1	0	3	4	6	1	5	4	3	2	1	3	4	7	9	7	2	3	0	3	4	3	4	2	2	2	5	1	2	4	6	3	1	11.2419	10.4479	11.0461	9.88598	10.468	9.98893	9.90803	9.53126	8.92316
chr11:19998120-20018189+	0	1	0	0	1	0	0	0	0	0	0	0	0	0	0	0	0	0	0	1	1	0	0	0	0	0	0	1	2	0	3	0	0	0	0	0	0	0	1	0	8.92316	9.47834	8.92316	8.92316	9.48822	8.92316	8.92316	8.92316	8.92316
chr11:20072456-20080172-	0	0	0	0	0	0	0	0	0	0	1	0	0	1	0	0	0	0	0	0	0	0	0	0	0	0	0	0	0	0	0	0	0	0	0	0	0	2	0	0	8.92316	8.92316	8.92316	8.92316	8.92316	8.92316	8.92316	8.92316	8.92316
chr11:20072456-20080798-	2	0	0	0	1	0	2	0	0	0	0	0	0	0	0	1	0	0	0	0	0	0	0	0	0	0	0	0	0	0	2	0	0	0	0	0	1	0	3	3	9.7694	8.92316	8.92316	8.92316	9.48822	8.92316	9.90803	8.92316	8.92316
chr11:20077188-20080798-	1	0	0	0	0	0	0	0	0	0	0	0	0	0	0	0	0	1	0	0	2	0	0	0	1	0	0	0	0	0	0	0	0	0	0	0	0	1	0	1	9.40746	8.92316	8.92316	8.92316	8.92316	8.92316	8.92316	8.92316	8.92316
chr11:20685326-20685885-	2	0	0	0	0	0	0	0	0	0	0	0	0	0	0	0	0	0	0	0	0	0	0	0	0	0	0	0	0	0	0	0	0	0	0	0	0	0	0	0	9.7694	8.92316	8.92316	8.92316	8.92316	8.92316	8.92316	8.92316	8.92316
chr11:20692465-20708737-	0	0	0	0	1	0	0	0	0	0	0	0	0	0	0	2	0	0	0	0	0	0	0	0	0	0	0	0	0	0	0	1	1	0	0	0	0	0	0	0	8.92316	8.92316	8.92316	8.92316	9.48822	8.92316	8.92316	8.92316	8.92316
chr11:20692465-20727639-	0	0	0	0	0	0	0	0	0	0	0	0	0	0	0	0	0	0	0	0	0	0	0	0	0	1	0	0	0	0	0	0	0	0	0	0	3	0	0	1	8.92316	8.92316	8.92316	8.92316	8.92316	8.92316	8.92316	8.92316	8.92316
chr11:20698313-20727639-	0	0	0	0	1	0	0	0	0	0	0	0	0	0	0	0	0	0	0	0	0	0	2	0	0	0	0	0	0	0	0	0	0	0	1	0	0	0	0	0	8.92316	8.92316	8.92316	8.92316	9.48822	8.92316	8.92316	8.92316	8.92316
chr11:20703711-20709746-	0	0	0	0	0	0	1	0	0	0	0	0	0	1	0	0	0	2	0	0	0	0	0	0	0	0	0	0	0	0	0	0	0	0	0	0	0	0	0	0	8.92316	8.92316	8.92316	8.92316	8.92316	8.92316	9.49805	8.92316	8.92316
chr11:20703711-20712315-	0	0	0	0	0	0	0	0	0	0	2	1	0	4	0	0	0	0	0	0	0	1	0	0	0	0	0	0	0	0	0	0	0	1	0	0	0	0	0	0	8.92316	8.92316	8.92316	8.92316	8.92316	8.92316	8.92316	8.92316	8.92316
chr11:20703711-20727639-	0	0	0	2	0	0	0	0	0	0	0	0	0	0	0	0	0	0	0	0	0	0	0	0	0	0	0	0	0	0	0	1	0	0	0	0	0	1	0	0	8.92316	8.92316	8.92316	9.88598	8.92316	8.92316	8.92316	8.92316	8.92316
chr11:20708681-20727639-	0	0	0	0	0	0	0	0	0	0	0	0	0	0	0	0	0	0	0	0	0	0	0	1	0	0	0	0	0	0	0	0	1	3	0	0	0	0	0	0	8.92316	8.92316	8.92316	8.92316	8.92316	8.92316	8.92316	8.92316	8.92316
chr11:20709620-20727639-	0	0	0	0	1	0	0	0	0	0	1	1	0	0	0	0	0	0	0	0	0	0	0	0	0	0	0	3	0	0	0	0	0	0	0	0	0	0	0	0	8.92316	8.92316	8.92316	8.92316	9.48822	8.92316	8.92316	8.92316	8.92316
chr11:20725685-20727639-	4	8	1	3	2	7	4	4	5	3	2	8	1	1	0	0	0	3	2	0	4	5	3	5	3	4	3	2	4	5	0	0	1	3	3	8	2	0	2	2	10.2992	11.1726	9.48818	10.2004	9.89321	11.1941	10.4879	10.554	10.7026
chr11:21136046-21148425+	0	0	0	0	0	0	0	0	1	0	0	0	0	0	0	2	4	2	0	1	0	1	0	1	0	1	1	1	2	0	1	0	0	0	0	0	0	0	0	0	8.92316	8.92316	8.92316	8.92316	8.92316	8.92316	8.92316	8.92316	9.49515
chr11:21263199-21264871+	0	0	0	0	0	0	2	0	0	1	1	0	2	2	0	1	1	0	0	0	1	0	1	0	0	0	3	0	0	0	0	0	0	0	0	0	0	0	0	0	8.92316	8.92316	8.92316	8.92316	8.92316	8.92316	9.90803	8.92316	8.92316
chr11:21263199-21275129+	0	0	0	0	0	1	0	1	0	0	0	0	0	0	0	0	0	0	0	0	0	3	0	0	0	0	0	0	0	0	0	0	0	1	0	0	0	0	0	0	8.92316	8.92316	8.92316	8.92316	8.92316	9.5523	8.92316	9.53126	8.92316
chr11:21263199-21278060+	2	1	1	1	4	1	1	2	0	6	0	0	4	0	0	0	2	0	0	0	3	1	0	0	0	0	0	0	3	1	1	0	0	1	3	0	3	0	1	1	9.7694	9.47834	9.48818	9.48344	10.468	9.5523	9.49805	9.95773	8.92316
chr11:21263199-21300318+	0	0	0	0	0	0	0	0	2	0	0	0	0	0	0	0	0	0	0	0	0	0	0	0	0	1	0	0	0	0	0	0	0	0	0	0	0	0	0	0	8.92316	8.92316	8.92316	8.92316	8.92316	8.92316	8.92316	8.92316	9.90366
chr11:21353349-21354406-	0	0	0	0	0	0	0	0	0	0	0	0	0	0	0	0	0	0	0	0	2	0	0	0	0	1	0	0	0	0	1	0	0	0	0	0	0	0	0	0	8.92316	8.92316	8.92316	8.92316	8.92316	8.92316	8.92316	8.92316	8.92316
chr11:21636441-21664385+	0	0	0	0	0	0	0	0	0	0	0	0	0	0	0	0	0	3	0	0	0	0	0	0	0	0	0	0	0	0	0	0	0	0	0	0	0	0	0	0	8.92316	8.92316	8.92316	8.92316	8.92316	8.92316	8.92316	8.92316	8.92316
chr11:21652226-21664385+	2	0	0	0	0	0	0	0	0	0	0	0	0	0	0	0	1	0	3	0	0	0	0	0	0	0	0	0	0	0	0	0	0	0	0	0	0	0	0	0	9.7694	8.92316	8.92316	8.92316	8.92316	8.92316	8.92316	8.92316	8.92316
chr11:21689568-21695305+	2	2	0	0	0	0	0	0	0	0	0	0	0	0	0	0	0	0	0	0	3	0	0	0	0	0	0	0	0	0	3	0	0	1	0	0	0	0	0	0	9.7694	9.87826	8.92316	8.92316	8.92316	8.92316	8.92316	8.92316	8.92316
chr11:21711462-21724636+	3	1	0	1	0	0	0	0	0	0	0	0	0	0	0	0	0	0	0	0	0	0	0	0	0	0	0	0	0	0	1	2	2	1	0	0	2	0	0	0	10.0585	9.47834	8.92316	9.48344	8.92316	8.92316	8.92316	8.92316	8.92316
chr11:21711462-21748941+	0	0	0	0	0	0	0	0	0	0	0	0	0	2	0	1	0	0	1	1	0	0	0	0	0	2	0	0	0	0	0	0	0	0	0	0	2	0	0	1	8.92316	8.92316	8.92316	8.92316	8.92316	8.92316	8.92316	8.92316	8.92316
chr11:22053432-22068506-	0	0	0	0	0	1	0	1	0	0	0	0	0	0	0	0	0	0	0	0	1	0	1	2	0	0	2	2	2	2	0	0	0	0	1	1	0	1	1	0	8.92316	8.92316	8.92316	8.92316	8.92316	9.5523	8.92316	9.53126	8.92316
chr11:22137838-22151189-	0	1	0	0	4	1	0	1	0	0	0	2	0	1	0	0	0	0	0	0	3	0	1	0	0	0	0	0	0	0	0	0	0	0	0	2	0	0	0	0	8.92316	9.47834	8.92316	8.92316	10.468	9.5523	8.92316	9.53126	8.92316
chr11:22232002-22239238-	1	0	0	0	0	0	0	0	1	0	0	0	2	0	0	0	0	0	0	0	0	0	0	0	0	0	0	0	0	0	0	0	0	0	0	0	0	0	1	0	9.40746	8.92316	8.92316	8.92316	8.92316	8.92316	8.92316	8.92316	9.49515
chr11:22956153-22956692-	0	0	0	0	0	0	0	0	1	0	0	0	0	0	0	0	1	2	0	0	0	0	0	0	0	0	1	0	0	0	0	0	0	0	0	0	0	0	0	0	8.92316	8.92316	8.92316	8.92316	8.92316	8.92316	8.92316	8.92316	9.49515
chr11:22956411-22958186-	0	0	0	1	0	0	0	0	0	0	0	0	0	0	3	0	0	0	0	0	0	0	0	0	0	0	0	0	0	0	0	0	1	0	0	0	0	0	0	0	8.92316	8.92316	8.92316	9.48344	8.92316	8.92316	8.92316	8.92316	8.92316
chr11:22995930-22996457+	0	0	0	0	0	0	0	0	0	1	0	1	0	0	0	0	0	0	0	0	0	0	0	2	0	1	0	0	0	0	0	0	0	0	0	0	0	0	0	0	8.92316	8.92316	8.92316	8.92316	8.92316	8.92316	8.92316	8.92316	8.92316
chr11:23261835-23271205+	0	0	0	2	2	0	0	0	1	0	1	0	2	1	0	0	0	3	2	0	2	0	0	0	0	1	0	0	1	0	0	1	1	0	0	0	0	0	1	3	8.92316	8.92316	8.92316	9.88598	9.89321	8.92316	8.92316	8.92316	9.49515
chr11:23261835-23282726+	2	0	0	0	0	0	0	0	0	0	0	0	0	0	0	0	0	0	0	0	0	0	0	0	0	0	0	0	0	0	0	0	0	0	0	0	0	0	0	0	9.7694	8.92316	8.92316	8.92316	8.92316	8.92316	8.92316	8.92316	8.92316
chr11:23266053-23271205+	0	0	0	0	0	0	0	0	0	0	0	0	0	0	0	0	0	0	0	0	0	0	0	0	0	0	0	0	0	0	0	0	0	0	0	0	0	3	0	0	8.92316	8.92316	8.92316	8.92316	8.92316	8.92316	8.92316	8.92316	8.92316
chr11:23280374-23282726+	0	0	0	0	0	2	0	0	0	0	0	0	0	0	0	0	0	0	0	0	0	0	0	0	0	0	0	0	0	0	0	0	0	0	0	0	0	0	0	0	8.92316	8.92316	8.92316	8.92316	8.92316	9.98893	8.92316	8.92316	8.92316
chr11:23281306-23282726+	4	0	0	0	0	0	0	0	0	0	0	0	0	0	0	0	0	0	0	0	0	0	0	0	0	0	0	0	0	0	0	1	0	0	0	0	1	0	0	2	10.2992	8.92316	8.92316	8.92316	8.92316	8.92316	8.92316	8.92316	8.92316
chr11:23333439-23355098+	0	0	0	0	0	0	0	0	0	0	0	0	0	0	0	1	1	0	0	0	0	0	0	0	0	0	0	0	0	0	0	0	0	0	0	3	0	0	0	0	8.92316	8.92316	8.92316	8.92316	8.92316	8.92316	8.92316	8.92316	8.92316
chr11:23343320-23355098+	0	0	0	0	0	0	0	0	1	0	0	0	0	0	0	0	0	0	0	0	0	0	0	0	0	0	0	0	0	0	1	0	2	0	1	0	0	0	0	1	8.92316	8.92316	8.92316	8.92316	8.92316	8.92316	8.92316	8.92316	9.49515
chr11:23349151-23355098+	0	0	0	0	0	0	0	0	0	0	0	0	0	0	0	0	0	0	0	0	0	0	0	0	0	0	0	0	0	0	0	0	0	0	0	2	0	0	0	0	8.92316	8.92316	8.92316	8.92316	8.92316	8.92316	8.92316	8.92316	8.92316
chr11:23351592-23355098+	0	1	0	0	1	0	2	0	1	0	0	0	0	0	0	0	0	0	0	0	1	0	0	0	0	0	0	1	0	0	0	2	0	0	0	0	0	0	0	0	8.92316	9.47834	8.92316	8.92316	9.48822	8.92316	9.90803	8.92316	9.49515
chr11:23351592-23441178+	0	0	0	0	0	0	0	0	0	0	0	0	0	0	0	0	0	0	0	0	0	0	0	0	0	0	0	0	0	0	0	0	0	0	0	2	0	0	0	0	8.92316	8.92316	8.92316	8.92316	8.92316	8.92316	8.92316	8.92316	8.92316
chr11:23354845-23355098+	0	0	1	0	0	0	2	0	0	0	1	0	0	0	0	0	0	0	0	0	0	1	0	0	0	0	0	0	0	0	0	0	0	0	0	0	0	0	0	2	8.92316	8.92316	9.48818	8.92316	8.92316	8.92316	9.90803	8.92316	8.92316
chr11:23354845-23401578+	0	0	0	0	0	0	0	0	0	0	0	0	0	0	0	0	0	0	0	0	0	0	0	0	0	0	0	0	0	0	0	0	0	0	0	0	0	0	4	0	8.92316	8.92316	8.92316	8.92316	8.92316	8.92316	8.92316	8.92316	8.92316
chr11:23370239-23377637+	0	0	0	0	0	0	0	0	0	0	0	0	0	2	0	1	0	0	0	0	0	0	0	0	0	0	0	0	0	0	0	0	0	0	0	0	0	0	0	0	8.92316	8.92316	8.92316	8.92316	8.92316	8.92316	8.92316	8.92316	8.92316
chr11:23377555-23405953+	0	0	0	0	0	0	0	0	0	0	0	0	0	0	0	0	0	0	0	0	0	0	0	0	0	0	0	0	0	0	0	0	0	0	0	4	0	0	0	0	8.92316	8.92316	8.92316	8.92316	8.92316	8.92316	8.92316	8.92316	8.92316
chr11:23381225-23382667+	0	0	0	0	0	0	0	0	0	0	0	0	0	0	0	0	0	0	0	0	0	0	0	0	0	0	0	0	0	0	0	0	0	0	0	0	0	3	0	0	8.92316	8.92316	8.92316	8.92316	8.92316	8.92316	8.92316	8.92316	8.92316
chr11:23381225-23393961+	0	0	0	0	0	0	0	0	0	0	0	0	0	0	0	0	0	0	0	0	0	2	0	0	0	0	0	0	0	0	0	0	0	0	0	0	0	0	0	0	8.92316	8.92316	8.92316	8.92316	8.92316	8.92316	8.92316	8.92316	8.92316
chr11:23384401-23385172+	0	0	0	0	0	0	0	0	0	0	0	0	0	0	0	0	0	0	0	0	0	0	0	0	0	2	0	0	0	0	0	0	0	0	0	0	0	0	0	0	8.92316	8.92316	8.92316	8.92316	8.92316	8.92316	8.92316	8.92316	8.92316
chr11:23388434-23414818+	0	0	0	0	0	0	0	0	0	0	0	0	0	0	0	0	0	0	0	0	3	0	0	0	0	0	0	0	0	0	0	0	0	0	0	0	0	0	0	0	8.92316	8.92316	8.92316	8.92316	8.92316	8.92316	8.92316	8.92316	8.92316
chr11:23388434-23419131+	0	2	0	0	0	0	0	0	0	0	0	0	0	0	0	1	0	0	0	0	0	0	0	0	0	0	0	0	0	0	0	0	0	0	0	0	0	0	0	0	8.92316	9.87826	8.92316	8.92316	8.92316	8.92316	8.92316	8.92316	8.92316
chr11:23401453-23405953+	0	0	1	0	2	0	0	0	0	0	0	0	0	0	0	1	1	0	0	0	1	0	0	1	0	0	0	0	0	0	0	0	0	0	1	0	0	0	0	0	8.92316	8.92316	9.48818	8.92316	9.89321	8.92316	8.92316	8.92316	8.92316
chr11:23414736-23420144+	0	0	0	0	0	0	0	0	0	0	0	0	0	0	0	0	0	0	0	0	0	0	0	0	1	1	0	0	0	0	0	0	0	0	0	0	3	0	0	2	8.92316	8.92316	8.92316	8.92316	8.92316	8.92316	8.92316	8.92316	8.92316
chr11:23446432-23449293+	0	0	0	0	0	0	0	0	0	0	0	0	0	0	0	0	0	0	0	0	0	0	3	0	0	0	0	0	0	0	0	0	1	0	0	1	0	1	1	1	8.92316	8.92316	8.92316	8.92316	8.92316	8.92316	8.92316	8.92316	8.92316
chr11:23646321-23656130-	0	0	0	0	0	0	0	0	0	0	0	0	0	0	0	0	0	0	0	0	0	0	0	0	2	0	0	0	0	0	0	0	2	0	0	0	0	0	0	0	8.92316	8.92316	8.92316	8.92316	8.92316	8.92316	8.92316	8.92316	8.92316
chr11:23649270-23651055-	1	0	0	0	0	0	0	0	0	0	1	0	0	0	0	0	2	0	0	0	1	0	1	0	1	0	0	0	0	0	0	0	0	0	0	0	0	0	0	0	9.40746	8.92316	8.92316	8.92316	8.92316	8.92316	8.92316	8.92316	8.92316
chr11:23748751-23757047-	0	0	0	0	0	0	0	2	0	0	0	0	0	0	0	0	0	0	0	0	0	0	0	0	0	0	0	0	0	0	0	0	0	0	0	0	0	0	0	0	8.92316	8.92316	8.92316	8.92316	8.92316	8.92316	8.92316	9.95773	8.92316
chr11:23756899-23761155-	1	2	0	0	0	0	0	0	0	0	0	0	0	0	0	0	0	0	0	0	0	0	0	0	0	0	0	0	0	0	0	0	0	0	0	0	0	0	0	0	9.40746	9.87826	8.92316	8.92316	8.92316	8.92316	8.92316	8.92316	8.92316
chr11:24085321-24085650+	0	0	0	0	0	4	0	0	0	0	0	0	0	0	0	0	0	0	0	0	0	0	0	0	0	0	0	0	0	0	0	0	0	0	0	0	0	0	0	0	8.92316	8.92316	8.92316	8.92316	8.92316	10.5952	8.92316	8.92316	8.92316
chr11:24120302-24120616+	0	0	0	0	0	0	0	0	0	0	0	0	2	0	0	0	0	0	0	0	0	0	0	0	0	0	0	0	0	0	0	0	0	0	0	0	0	0	0	0	8.92316	8.92316	8.92316	8.92316	8.92316	8.92316	8.92316	8.92316	8.92316
chr11:26397746-26407648+	1	0	0	0	0	0	0	0	0	0	0	0	0	0	0	0	0	0	0	1	0	0	0	0	0	0	0	0	0	1	0	0	0	1	0	0	0	0	5	0	9.40746	8.92316	8.92316	8.92316	8.92316	8.92316	8.92316	8.92316	8.92316
chr11:26397746-26434500+	4	0	2	3	1	1	0	0	6	1	0	1	3	1	0	0	0	0	0	1	2	0	3	1	2	1	0	2	6	0	0	0	1	2	0	3	0	0	0	0	10.2992	8.92316	9.89315	10.2004	9.48822	9.5523	8.92316	8.92316	10.8938
chr11:26403322-26434500+	0	0	0	0	0	0	0	0	1	0	0	0	0	0	0	0	0	0	0	0	0	0	0	0	0	0	0	0	0	0	0	0	0	2	0	0	0	0	0	0	8.92316	8.92316	8.92316	8.92316	8.92316	8.92316	8.92316	8.92316	9.49515
chr11:26407548-26441948+	0	0	0	0	0	0	0	0	0	0	0	2	0	0	0	0	0	0	0	0	0	0	0	0	0	0	0	0	0	0	0	0	0	0	0	0	0	0	0	0	8.92316	8.92316	8.92316	8.92316	8.92316	8.92316	8.92316	8.92316	8.92316
chr11:26422408-26434500+	0	0	0	0	0	0	0	0	0	0	0	0	1	0	0	0	0	0	0	0	0	0	0	0	0	2	0	0	0	0	0	0	1	0	0	0	2	0	0	0	8.92316	8.92316	8.92316	8.92316	8.92316	8.92316	8.92316	8.92316	8.92316
chr11:26534211-26550075-	1	0	1	1	1	1	1	3	1	2	3	4	0	3	0	1	2	4	5	2	2	0	1	0	1	2	2	2	3	0	2	2	1	1	0	4	1	3	0	3	9.40746	8.92316	9.48818	9.48344	9.48822	9.5523	9.49805	10.2865	9.49515
chr11:28867466-28868039+	1	1	0	0	0	0	0	0	0	0	0	0	2	0	0	0	0	0	0	0	0	2	0	0	0	0	0	1	0	0	0	1	0	2	0	0	0	0	0	0	9.40746	9.47834	8.92316	8.92316	8.92316	8.92316	8.92316	8.92316	8.92316
chr11:29182447-29197209+	0	0	0	0	0	0	0	0	0	0	0	0	0	0	0	0	0	0	0	0	0	0	0	0	0	0	0	0	0	0	0	2	0	0	0	0	0	0	1	0	8.92316	8.92316	8.92316	8.92316	8.92316	8.92316	8.92316	8.92316	8.92316
chr11:29187951-29200803+	0	0	1	2	0	0	0	0	0	0	0	0	0	0	0	0	0	0	0	0	0	0	0	0	0	0	0	0	0	0	0	0	0	0	0	0	0	0	0	0	8.92316	8.92316	9.48818	9.88598	8.92316	8.92316	8.92316	8.92316	8.92316
chr11:29533226-29545101+	0	0	3	2	0	0	1	0	1	0	3	4	1	1	0	0	1	0	0	0	1	2	1	0	0	0	0	2	2	1	0	0	1	1	0	0	1	0	3	1	8.92316	8.92316	10.209	9.88598	8.92316	8.92316	9.49805	8.92316	9.49515
chr11:29533832-29545101+	0	0	0	0	0	0	0	0	0	0	0	0	0	0	0	0	0	0	2	0	0	0	0	0	0	0	0	0	0	0	0	0	0	0	0	0	0	0	0	0	8.92316	8.92316	8.92316	8.92316	8.92316	8.92316	8.92316	8.92316	8.92316
chr11:29535090-29542509+	0	0	0	0	0	0	0	0	0	0	0	0	0	0	0	0	0	0	0	0	0	0	0	0	0	0	0	0	0	0	0	0	0	0	0	0	0	0	2	0	8.92316	8.92316	8.92316	8.92316	8.92316	8.92316	8.92316	8.92316	8.92316
chr11:29705535-29708770+	0	3	0	0	3	0	0	1	0	0	0	0	0	0	0	0	0	0	0	0	0	0	0	0	0	0	1	0	0	1	0	0	1	0	0	0	0	0	0	0	8.92316	10.191	8.92316	8.92316	10.2091	8.92316	8.92316	9.53126	8.92316
chr11:29706410-29708770+	0	0	0	0	0	0	0	0	0	0	1	3	0	1	0	0	0	0	0	0	0	0	0	0	0	1	0	0	0	0	0	1	0	0	0	0	0	0	1	0	8.92316	8.92316	8.92316	8.92316	8.92316	8.92316	8.92316	8.92316	8.92316
chr11:29707715-29742711+	0	0	0	0	2	0	0	0	0	0	0	0	0	0	0	0	0	0	0	0	0	0	0	0	0	0	0	0	0	0	0	0	0	0	0	0	0	0	0	0	8.92316	8.92316	8.92316	8.92316	9.89321	8.92316	8.92316	8.92316	8.92316
chr11:29733633-29741050+	0	0	0	0	0	0	0	0	0	0	0	0	0	0	0	0	0	0	0	0	0	0	0	0	0	0	0	1	2	0	0	0	0	0	0	0	0	0	0	0	8.92316	8.92316	8.92316	8.92316	8.92316	8.92316	8.92316	8.92316	8.92316
chr11:29742130-29742396+	0	0	0	0	0	0	0	0	0	0	0	0	0	0	0	0	0	0	0	0	0	0	0	2	0	0	0	0	0	0	0	0	0	0	0	0	0	0	0	0	8.92316	8.92316	8.92316	8.92316	8.92316	8.92316	8.92316	8.92316	8.92316
chr11:29784064-29805814-	0	0	0	0	0	0	0	0	0	0	0	0	0	0	0	0	0	0	0	0	0	0	0	0	0	0	0	0	2	0	0	0	0	0	0	0	0	0	0	0	8.92316	8.92316	8.92316	8.92316	8.92316	8.92316	8.92316	8.92316	8.92316
chr11:29854608-29854775-	0	0	0	0	0	0	0	0	0	0	0	0	0	0	0	0	0	2	0	0	0	0	0	0	0	0	0	0	0	0	0	0	0	0	0	0	0	0	0	0	8.92316	8.92316	8.92316	8.92316	8.92316	8.92316	8.92316	8.92316	8.92316
chr11:30109089-30125012-	0	0	0	0	0	0	0	0	0	0	0	0	0	0	0	0	0	0	0	0	0	2	0	0	0	0	0	0	0	0	0	0	0	0	0	0	0	0	0	0	8.92316	8.92316	8.92316	8.92316	8.92316	8.92316	8.92316	8.92316	8.92316
chr11:30177855-30179342-	0	0	0	0	0	0	0	0	0	0	0	2	0	0	0	0	0	0	0	0	0	0	0	0	0	0	0	0	0	0	0	0	0	0	0	0	0	0	0	0	8.92316	8.92316	8.92316	8.92316	8.92316	8.92316	8.92316	8.92316	8.92316
chr11:30206029-30206253-	0	0	0	0	0	0	0	0	0	0	0	0	0	0	0	0	0	0	2	0	0	0	0	0	0	0	0	0	0	0	0	0	0	0	0	0	0	0	0	0	8.92316	8.92316	8.92316	8.92316	8.92316	8.92316	8.92316	8.92316	8.92316
chr11:30219579-30219772-	2	1	0	1	1	0	0	0	0	2	0	2	0	1	1	0	0	0	0	0	2	0	0	0	0	0	0	0	2	0	0	1	0	1	0	0	0	0	4	0	9.7694	9.47834	8.92316	9.48344	9.48822	8.92316	8.92316	8.92316	8.92316
chr11:30566198-30568288-	2	0	0	0	0	0	0	0	0	0	0	0	0	0	0	0	0	0	0	0	0	0	0	0	0	0	0	0	0	0	0	0	0	0	0	0	0	0	0	0	9.7694	8.92316	8.92316	8.92316	8.92316	8.92316	8.92316	8.92316	8.92316
chr11:30791092-30792038+	0	0	0	0	0	0	0	0	0	0	0	0	1	0	0	0	0	0	0	0	0	0	0	0	2	0	0	0	1	0	0	0	0	0	0	0	0	0	0	0	8.92316	8.92316	8.92316	8.92316	8.92316	8.92316	8.92316	8.92316	8.92316
chr11:30791092-30802858+	1	0	0	0	0	0	0	0	0	0	0	0	0	0	0	0	1	0	0	0	0	0	0	0	2	0	0	0	0	0	0	1	0	0	0	0	0	0	0	0	9.40746	8.92316	8.92316	8.92316	8.92316	8.92316	8.92316	8.92316	8.92316
chr11:30810783-30837491+	0	0	0	0	0	0	0	0	0	0	0	0	0	0	0	0	0	0	0	0	0	0	0	0	0	0	0	0	0	0	0	0	0	0	0	0	2	0	0	0	8.92316	8.92316	8.92316	8.92316	8.92316	8.92316	8.92316	8.92316	8.92316
chr11:30819004-30835467+	0	0	0	0	0	0	0	0	0	0	0	2	0	0	0	0	1	0	0	0	0	0	0	0	0	0	0	0	0	0	0	0	0	0	0	0	0	0	0	0	8.92316	8.92316	8.92316	8.92316	8.92316	8.92316	8.92316	8.92316	8.92316
chr11:30830350-30837491+	0	0	0	0	0	0	0	0	0	0	0	0	0	0	3	0	0	0	0	0	0	0	0	0	0	0	0	0	0	0	0	0	0	0	0	0	0	0	0	0	8.92316	8.92316	8.92316	8.92316	8.92316	8.92316	8.92316	8.92316	8.92316
chr11:30830427-30831033+	0	0	0	0	0	0	0	0	0	0	0	0	0	0	0	0	0	0	0	0	0	0	0	0	0	0	0	0	0	0	0	0	0	0	0	0	2	0	0	0	8.92316	8.92316	8.92316	8.92316	8.92316	8.92316	8.92316	8.92316	8.92316
chr11:30845180-30851234+	0	0	0	0	0	0	0	0	0	0	0	0	0	0	0	0	0	0	0	0	2	0	0	0	0	0	0	0	0	0	0	0	0	0	0	0	0	0	0	0	8.92316	8.92316	8.92316	8.92316	8.92316	8.92316	8.92316	8.92316	8.92316
chr11:30934672-30935445-	0	0	0	0	0	0	0	0	0	0	0	0	0	0	0	0	0	0	0	0	0	0	0	0	0	0	0	0	0	0	0	0	0	0	0	0	0	2	0	0	8.92316	8.92316	8.92316	8.92316	8.92316	8.92316	8.92316	8.92316	8.92316
chr11:30934672-30949977-	0	0	0	0	0	0	2	0	0	0	0	0	0	0	0	0	0	0	0	0	0	0	0	0	0	0	0	0	0	0	0	0	0	0	0	0	0	0	0	0	8.92316	8.92316	8.92316	8.92316	8.92316	8.92316	9.90803	8.92316	8.92316
chr11:31055458-31058999+	0	0	0	0	0	0	0	0	0	0	0	0	0	0	0	0	0	0	0	0	0	0	0	0	0	0	0	0	0	0	0	0	0	0	0	0	1	0	0	3	8.92316	8.92316	8.92316	8.92316	8.92316	8.92316	8.92316	8.92316	8.92316
chr11:31055458-31061586+	1	3	5	5	5	0	1	3	1	1	0	2	5	0	1	2	3	6	7	2	4	4	2	0	4	0	1	3	0	2	3	3	3	3	1	6	3	0	6	4	9.40746	10.191	10.6874	10.6771	10.6875	8.92316	9.49805	10.2865	9.49515
chr11:31055458-31064087+	0	0	0	3	0	1	0	0	0	3	0	1	1	1	0	0	0	0	0	0	0	0	0	0	0	0	1	0	1	0	0	0	0	1	0	2	0	0	0	0	8.92316	8.92316	8.92316	10.2004	8.92316	9.5523	8.92316	8.92316	8.92316
chr11:31055458-31085131+	0	0	0	0	0	0	0	0	0	2	0	0	0	0	0	0	0	0	0	0	0	0	0	0	0	0	0	0	0	0	0	0	0	0	0	0	0	0	0	0	8.92316	8.92316	8.92316	8.92316	8.92316	8.92316	8.92316	8.92316	8.92316
chr11:31925466-31927636+	0	0	0	0	0	0	0	0	0	0	0	0	0	0	0	0	0	0	0	0	0	0	3	0	0	0	0	0	0	0	0	0	0	0	0	0	0	0	0	0	8.92316	8.92316	8.92316	8.92316	8.92316	8.92316	8.92316	8.92316	8.92316
chr11:32215674-32215933-	0	0	0	0	0	0	0	0	0	0	0	0	0	0	0	0	0	2	0	0	0	0	0	0	0	0	0	0	0	0	0	0	0	0	0	0	0	0	0	0	8.92316	8.92316	8.92316	8.92316	8.92316	8.92316	8.92316	8.92316	8.92316
chr11:32662146-32662528+	0	0	0	2	0	0	0	0	0	0	0	0	0	0	0	0	0	0	0	0	0	0	0	0	0	0	0	0	0	0	0	0	0	0	0	0	0	0	0	0	8.92316	8.92316	8.92316	9.88598	8.92316	8.92316	8.92316	8.92316	8.92316
chr11:32708188-32711997+	0	0	0	1	1	0	0	0	0	0	0	0	0	0	0	0	0	0	0	0	0	0	0	0	0	0	0	0	0	0	0	2	0	3	0	0	0	0	0	0	8.92316	8.92316	8.92316	9.48344	9.48822	8.92316	8.92316	8.92316	8.92316
chr11:32711772-32711997+	0	0	0	0	0	0	0	0	0	0	0	0	0	0	0	0	1	0	0	0	0	2	0	0	0	1	0	0	0	0	0	0	0	0	0	0	0	0	0	0	8.92316	8.92316	8.92316	8.92316	8.92316	8.92316	8.92316	8.92316	8.92316
chr11:32742581-32744817+	0	0	0	0	0	0	0	0	0	0	0	0	0	0	0	0	0	0	0	0	0	0	0	0	0	0	0	0	0	0	0	0	0	0	0	0	0	2	0	0	8.92316	8.92316	8.92316	8.92316	8.92316	8.92316	8.92316	8.92316	8.92316
chr11:32745214-32745445+	0	0	0	0	0	0	0	0	2	0	0	0	0	0	0	0	0	0	0	0	0	0	0	0	0	0	0	0	0	0	0	0	0	0	0	0	0	0	0	0	8.92316	8.92316	8.92316	8.92316	8.92316	8.92316	8.92316	8.92316	9.90366
chr11:33245645-33245804-	0	0	0	0	0	0	0	0	0	0	0	0	0	2	0	0	0	0	0	0	0	0	0	0	0	0	0	0	0	0	0	0	0	0	0	0	0	0	0	0	8.92316	8.92316	8.92316	8.92316	8.92316	8.92316	8.92316	8.92316	8.92316
chr11:33474887-33483079-	0	0	0	0	0	0	0	0	0	0	2	0	0	2	0	0	0	0	0	0	0	0	0	0	0	0	0	0	0	0	0	0	0	0	0	0	0	0	0	0	8.92316	8.92316	8.92316	8.92316	8.92316	8.92316	8.92316	8.92316	8.92316
chr11:33478164-33504828-	0	3	0	0	0	0	0	0	0	0	0	0	0	0	0	0	0	0	0	0	0	0	0	0	0	0	0	0	0	0	0	0	0	0	0	0	0	0	0	0	8.92316	10.191	8.92316	8.92316	8.92316	8.92316	8.92316	8.92316	8.92316
chr11:34294110-34312557-	0	0	0	0	0	0	0	0	0	0	0	0	0	0	0	0	0	0	0	0	0	0	0	0	0	0	0	0	0	0	0	2	0	0	0	0	0	0	0	0	8.92316	8.92316	8.92316	8.92316	8.92316	8.92316	8.92316	8.92316	8.92316
chr11:34300487-34312557-	0	0	0	0	0	0	0	0	0	0	0	0	0	0	0	0	0	0	0	0	0	0	0	0	0	0	0	0	0	0	0	0	0	0	0	0	0	0	0	2	8.92316	8.92316	8.92316	8.92316	8.92316	8.92316	8.92316	8.92316	8.92316
chr11:34687508-34695501-	0	0	0	0	0	0	0	0	0	0	0	0	0	0	0	0	0	0	0	0	0	0	0	0	0	0	0	0	0	0	0	0	0	0	0	0	2	0	0	1	8.92316	8.92316	8.92316	8.92316	8.92316	8.92316	8.92316	8.92316	8.92316
chr11:34687508-34721064-	0	0	0	1	0	0	0	0	0	0	0	1	0	0	0	0	0	0	0	0	0	0	0	0	0	0	0	0	0	0	0	0	0	0	0	2	0	0	0	0	8.92316	8.92316	8.92316	9.48344	8.92316	8.92316	8.92316	8.92316	8.92316
chr11:35351033-35351689+	0	0	0	0	0	0	0	0	0	0	0	0	0	0	0	0	0	0	0	0	0	0	0	0	0	0	0	0	0	0	0	0	0	0	0	0	0	0	2	0	8.92316	8.92316	8.92316	8.92316	8.92316	8.92316	8.92316	8.92316	8.92316
chr11:35570568-35579107+	0	0	0	0	0	0	0	0	0	0	0	4	0	0	0	0	0	0	0	0	0	0	0	0	0	0	0	0	0	0	0	0	0	0	0	0	0	0	0	0	8.92316	8.92316	8.92316	8.92316	8.92316	8.92316	8.92316	8.92316	8.92316
chr11:35785905-35786313+	0	0	0	3	0	0	0	0	0	0	0	0	0	0	0	0	0	0	0	0	0	0	0	0	0	0	0	0	0	0	0	0	0	0	0	0	0	0	0	0	8.92316	8.92316	8.92316	10.2004	8.92316	8.92316	8.92316	8.92316	8.92316
chr11:35829361-35829869-	0	0	0	0	0	0	0	0	0	0	0	0	0	0	0	0	0	0	0	0	0	0	0	0	0	0	0	0	2	0	0	0	0	0	0	0	0	0	0	0	8.92316	8.92316	8.92316	8.92316	8.92316	8.92316	8.92316	8.92316	8.92316
chr11:35852194-35867427-	0	0	0	0	0	0	0	0	0	0	0	0	0	0	0	0	0	0	0	0	0	2	0	0	0	0	0	0	0	0	0	0	0	0	0	0	0	0	0	0	8.92316	8.92316	8.92316	8.92316	8.92316	8.92316	8.92316	8.92316	8.92316
chr11:35883248-35898695-	0	0	3	0	0	0	0	0	0	0	0	0	0	0	0	0	0	1	0	0	0	0	0	0	0	0	0	0	1	0	0	0	0	0	0	0	0	0	0	0	8.92316	8.92316	10.209	8.92316	8.92316	8.92316	8.92316	8.92316	8.92316
chr11:41498911-41499246+	1	0	0	0	0	0	0	0	0	0	0	0	0	0	0	0	1	0	0	0	0	0	0	0	0	0	0	0	0	0	0	0	0	0	0	0	0	0	4	0	9.40746	8.92316	8.92316	8.92316	8.92316	8.92316	8.92316	8.92316	8.92316
chr11:43197437-43203250+	0	0	0	0	0	0	0	0	0	0	0	0	0	0	0	1	0	0	0	0	0	0	0	0	0	2	0	0	0	0	0	0	0	0	0	0	0	0	0	0	8.92316	8.92316	8.92316	8.92316	8.92316	8.92316	8.92316	8.92316	8.92316
chr11:43245404-43254363+	1	0	0	0	0	0	0	0	1	0	0	0	0	0	0	0	0	0	1	1	0	0	0	0	0	0	0	0	0	0	0	0	0	0	0	0	4	0	0	0	9.40746	8.92316	8.92316	8.92316	8.92316	8.92316	8.92316	8.92316	9.49515
chr11:43259489-43260208+	0	0	0	0	0	0	0	0	0	0	1	2	0	0	0	0	0	0	0	0	0	0	0	0	0	0	0	0	0	0	0	0	0	0	0	0	0	0	0	0	8.92316	8.92316	8.92316	8.92316	8.92316	8.92316	8.92316	8.92316	8.92316
chr11:43422893-43425681-	0	0	2	0	0	0	0	0	0	0	0	0	0	0	0	0	0	0	0	0	0	0	0	0	0	0	0	0	0	0	0	0	0	0	0	0	0	0	0	0	8.92316	8.92316	9.89315	8.92316	8.92316	8.92316	8.92316	8.92316	8.92316
chr11:43699279-43705477+	1	0	0	0	0	0	0	0	0	0	0	0	0	0	0	0	0	0	0	1	0	0	2	0	3	0	0	0	0	0	0	0	0	0	0	0	0	0	0	0	9.40746	8.92316	8.92316	8.92316	8.92316	8.92316	8.92316	8.92316	8.92316
chr11:43704534-43705477+	17	11	13	17	14	4	13	6	6	13	12	11	15	10	2	3	3	18	18	11	11	9	11	15	7	6	8	11	9	10	12	9	5	21	4	8	4	6	9	2	11.8832	11.5468	11.7776	12.1039	11.8703	10.5952	11.8037	10.9747	10.8938
chr11:43704534-43705554+	0	0	0	0	0	0	0	0	0	0	0	0	0	0	0	0	0	0	0	0	0	0	0	0	2	0	0	0	0	0	0	0	0	0	0	0	0	0	0	0	8.92316	8.92316	8.92316	8.92316	8.92316	8.92316	8.92316	8.92316	8.92316
chr11:43704534-43705567+	2	0	0	0	1	0	0	0	0	0	0	0	0	0	0	0	0	0	0	0	0	0	2	1	0	0	0	1	0	0	0	0	0	0	1	2	0	0	0	0	9.7694	8.92316	8.92316	8.92316	9.48822	8.92316	8.92316	8.92316	8.92316
chr11:43704534-43717149+	1	0	0	1	2	0	0	0	0	0	0	0	0	0	0	1	0	0	0	2	2	0	1	0	1	0	1	0	1	2	0	0	0	1	2	0	0	0	2	0	9.40746	8.92316	8.92316	9.48344	9.89321	8.92316	8.92316	8.92316	8.92316
chr11:43739717-43745447-	0	0	0	0	0	0	0	0	0	0	2	1	0	0	0	0	2	0	0	0	0	0	0	0	0	0	0	1	0	0	0	0	0	0	0	0	0	0	0	0	8.92316	8.92316	8.92316	8.92316	8.92316	8.92316	8.92316	8.92316	8.92316
chr11:44524928-44542720+	0	0	2	1	0	0	0	0	0	0	0	0	0	0	1	0	0	0	0	0	0	0	0	0	0	0	0	0	0	0	0	0	0	0	0	0	0	0	0	0	8.92316	8.92316	9.89315	9.48344	8.92316	8.92316	8.92316	8.92316	8.92316
chr11:44524928-44551819+	0	0	0	0	0	0	1	0	0	0	0	0	0	0	0	0	0	0	0	0	0	2	0	0	0	0	0	0	0	0	0	0	0	0	0	0	0	0	0	0	8.92316	8.92316	8.92316	8.92316	8.92316	8.92316	9.49805	8.92316	8.92316
chr11:44531276-44551819+	0	0	0	0	0	0	0	0	0	0	0	0	0	0	0	0	0	0	0	0	0	0	0	0	0	0	0	0	0	0	0	0	0	0	0	0	0	0	2	0	8.92316	8.92316	8.92316	8.92316	8.92316	8.92316	8.92316	8.92316	8.92316
chr11:44542629-44551819+	0	0	0	0	0	1	0	0	0	2	0	0	0	0	0	0	0	0	0	0	0	0	0	0	0	0	0	0	0	0	0	0	0	0	0	0	0	0	0	0	8.92316	8.92316	8.92316	8.92316	8.92316	9.5523	8.92316	8.92316	8.92316
chr11:44620414-44643469+	0	0	0	2	0	0	1	0	0	0	0	0	0	0	0	0	0	0	0	0	0	0	0	0	0	0	0	0	0	0	0	0	0	0	0	0	0	0	0	0	8.92316	8.92316	8.92316	9.88598	8.92316	8.92316	9.49805	8.92316	8.92316
chr11:44716745-44718007+	0	0	0	0	0	0	0	0	0	0	0	0	0	0	2	0	0	0	0	0	0	0	0	0	0	0	0	0	0	0	0	0	0	0	0	0	0	0	0	0	8.92316	8.92316	8.92316	8.92316	8.92316	8.92316	8.92316	8.92316	8.92316
chr11:44821393-44821552+	0	0	0	0	0	0	0	0	0	0	0	0	0	0	0	0	0	0	0	0	0	0	0	0	0	0	2	0	0	0	0	0	0	0	0	0	0	0	0	0	8.92316	8.92316	8.92316	8.92316	8.92316	8.92316	8.92316	8.92316	8.92316
chr11:44959415-44959811+	2	0	0	0	0	0	0	0	0	0	0	0	0	0	0	0	0	0	0	0	0	0	0	0	0	0	0	0	0	0	0	0	0	0	0	0	0	0	0	0	9.7694	8.92316	8.92316	8.92316	8.92316	8.92316	8.92316	8.92316	8.92316
chr11:45883710-45887550+	0	1	2	1	0	0	0	0	0	0	0	0	0	0	0	0	0	0	0	0	0	0	0	0	0	0	0	0	0	0	0	0	0	0	0	0	0	0	0	0	8.92316	9.47834	9.89315	9.48344	8.92316	8.92316	8.92316	8.92316	8.92316
chr11:45883710-45895129+	2	1	0	2	4	0	1	3	2	0	1	2	3	6	0	1	1	1	0	1	2	2	3	3	3	2	2	2	1	3	2	0	1	4	1	2	0	1	0	1	9.7694	9.47834	8.92316	9.88598	10.468	8.92316	9.49805	10.2865	9.90366
chr11:45886431-45895129+	0	0	0	0	0	0	0	0	2	0	0	0	0	1	0	0	0	0	0	0	0	0	0	0	0	0	0	0	0	0	0	1	0	0	0	0	0	0	0	0	8.92316	8.92316	8.92316	8.92316	8.92316	8.92316	8.92316	8.92316	9.90366
chr11:46112757-46118491+	0	0	0	0	0	0	0	0	0	0	0	1	0	0	0	0	0	2	0	0	0	0	0	1	0	0	0	0	0	0	0	0	0	0	0	0	0	0	0	0	8.92316	8.92316	8.92316	8.92316	8.92316	8.92316	8.92316	8.92316	8.92316
chr11:46130084-46136574+	0	0	0	0	0	0	0	0	0	0	0	0	0	0	0	0	0	0	0	0	0	0	0	0	0	0	0	0	0	0	0	0	0	0	0	0	0	0	3	0	8.92316	8.92316	8.92316	8.92316	8.92316	8.92316	8.92316	8.92316	8.92316
chr11:46134428-46136461+	0	0	0	0	0	0	2	0	0	0	0	0	0	0	0	0	1	0	0	0	0	0	0	0	0	0	0	0	0	0	0	0	0	0	0	0	0	0	0	0	8.92316	8.92316	8.92316	8.92316	8.92316	8.92316	9.90803	8.92316	8.92316
chr11:46221336-46224205-	0	0	0	0	0	0	0	0	0	0	0	0	0	0	0	1	3	1	2	0	0	0	0	0	0	0	1	0	2	1	0	2	0	0	1	0	0	1	0	0	8.92316	8.92316	8.92316	8.92316	8.92316	8.92316	8.92316	8.92316	8.92316
chr11:46273152-46273475-	0	0	0	0	0	0	0	0	0	0	0	0	0	0	0	0	0	0	2	0	0	0	0	0	0	0	0	0	0	0	0	0	0	0	0	0	0	0	0	0	8.92316	8.92316	8.92316	8.92316	8.92316	8.92316	8.92316	8.92316	8.92316
chr11:46363797-46367935-	0	0	0	0	0	0	0	0	0	0	0	0	0	0	0	0	0	3	0	0	0	0	0	0	0	0	0	0	0	0	0	0	0	0	0	0	1	0	0	1	8.92316	8.92316	8.92316	8.92316	8.92316	8.92316	8.92316	8.92316	8.92316
chr11:48801663-48802420+	2	0	0	0	0	0	0	0	0	0	0	0	0	0	0	0	0	0	0	0	0	0	0	0	0	0	0	0	0	0	0	0	0	0	0	0	0	0	0	0	9.7694	8.92316	8.92316	8.92316	8.92316	8.92316	8.92316	8.92316	8.92316
chr11:48815861-48816193-	0	0	0	0	0	0	0	0	0	0	0	0	0	0	0	0	0	2	0	0	0	0	0	0	0	0	0	0	0	0	0	0	0	0	0	0	0	0	0	0	8.92316	8.92316	8.92316	8.92316	8.92316	8.92316	8.92316	8.92316	8.92316
chr11:48871094-48871380-	0	0	0	0	0	0	0	0	0	0	0	0	0	0	0	0	0	0	0	0	3	0	0	0	0	0	0	0	0	0	0	0	0	0	0	0	0	0	0	0	8.92316	8.92316	8.92316	8.92316	8.92316	8.92316	8.92316	8.92316	8.92316
chr11:49248115-49248345+	0	0	0	0	0	0	0	0	0	0	0	0	0	0	0	0	0	0	0	0	0	0	0	0	0	0	0	0	0	4	0	0	0	0	0	0	0	0	0	0	8.92316	8.92316	8.92316	8.92316	8.92316	8.92316	8.92316	8.92316	8.92316
chr11:49675130-49702654-	3	0	0	0	1	0	0	0	1	0	0	0	0	0	0	0	0	0	0	0	1	0	0	0	0	0	0	0	0	0	0	0	0	0	0	0	0	0	0	0	10.0585	8.92316	8.92316	8.92316	9.48822	8.92316	8.92316	8.92316	9.49515
chr11:49677300-49702654-	0	0	0	0	0	0	0	0	0	0	0	0	0	0	0	1	3	1	0	0	0	0	0	0	0	0	0	0	0	0	0	0	0	0	0	0	0	1	0	0	8.92316	8.92316	8.92316	8.92316	8.92316	8.92316	8.92316	8.92316	8.92316
chr11:49686847-49702654-	1	0	0	0	0	0	0	0	0	0	0	0	0	0	0	0	0	0	0	0	0	0	0	1	1	0	1	0	0	0	0	0	0	0	0	3	0	0	0	0	9.40746	8.92316	8.92316	8.92316	8.92316	8.92316	8.92316	8.92316	8.92316
chr11:49863544-49879826+	0	0	0	0	0	0	0	0	0	0	0	0	0	0	0	0	0	0	0	0	0	0	1	0	2	0	0	0	0	0	0	0	0	0	0	0	0	0	0	0	8.92316	8.92316	8.92316	8.92316	8.92316	8.92316	8.92316	8.92316	8.92316
chr11:50260977-50267010-	0	0	0	0	0	0	0	0	0	0	0	0	0	0	0	0	1	1	0	0	0	0	0	0	0	0	0	0	0	0	0	0	0	0	0	0	0	0	0	2	8.92316	8.92316	8.92316	8.92316	8.92316	8.92316	8.92316	8.92316	8.92316
chr11:50296096-50296335-	0	0	0	0	0	0	0	0	0	0	0	0	0	0	0	0	0	0	0	0	0	0	0	0	0	0	0	0	0	0	3	0	0	0	0	0	0	0	0	0	8.92316	8.92316	8.92316	8.92316	8.92316	8.92316	8.92316	8.92316	8.92316
chr11:50297058-50301054-	3	0	0	0	0	0	0	0	0	0	0	0	0	0	0	0	0	0	0	0	0	0	0	0	0	0	0	0	0	0	0	0	0	0	0	0	0	0	0	0	10.0585	8.92316	8.92316	8.92316	8.92316	8.92316	8.92316	8.92316	8.92316
chr11:50301758-50308929-	1	3	2	0	0	2	1	0	3	0	0	1	2	1	0	1	0	2	0	0	0	0	0	1	0	0	1	3	7	1	0	0	0	0	0	1	2	0	0	0	9.40746	10.191	9.89315	8.92316	8.92316	9.98893	9.49805	8.92316	10.2217
chr11:50301758-50310867-	0	0	0	0	2	0	0	0	1	1	5	2	0	0	0	0	0	0	0	0	0	0	2	0	1	0	1	0	0	0	1	0	0	2	0	0	0	0	0	0	8.92316	8.92316	8.92316	8.92316	9.89321	8.92316	8.92316	8.92316	9.49515
chr11:50304326-50308929-	0	1	0	2	2	0	0	0	0	0	0	3	0	0	0	0	0	0	2	0	2	1	0	0	0	3	1	0	0	0	0	0	1	0	1	0	2	0	0	0	8.92316	9.47834	8.92316	9.88598	9.89321	8.92316	8.92316	8.92316	8.92316
chr11:50304326-50310867-	2	0	0	0	0	0	0	1	0	0	0	0	0	0	0	0	0	0	0	0	0	0	0	0	0	0	0	0	0	0	0	0	0	0	0	0	0	0	0	0	9.7694	8.92316	8.92316	8.92316	8.92316	8.92316	8.92316	9.53126	8.92316
chr11:50307470-50308929-	0	3	1	0	1	1	0	2	1	3	0	0	6	1	0	1	0	1	0	1	3	2	1	0	3	2	3	0	1	2	0	3	0	1	0	2	2	0	0	1	8.92316	10.191	9.48818	8.92316	9.48822	9.5523	8.92316	9.95773	9.49515
chr11:50307470-50310867-	0	1	0	0	0	0	0	0	0	0	2	1	0	0	0	1	0	1	0	0	1	1	1	0	0	1	1	0	0	1	0	3	1	0	0	2	0	0	0	1	8.92316	9.47834	8.92316	8.92316	8.92316	8.92316	8.92316	8.92316	8.92316
chr11:50307470-50311784-	0	0	0	0	0	0	0	0	0	0	0	0	0	0	0	0	0	1	0	0	0	0	0	0	2	0	0	0	1	1	0	0	0	0	0	0	1	0	0	0	8.92316	8.92316	8.92316	8.92316	8.92316	8.92316	8.92316	8.92316	8.92316
chr11:50404454-50407924-	0	0	0	0	0	0	0	0	0	0	0	0	0	0	0	0	0	0	0	0	0	0	0	0	0	0	0	0	0	0	0	0	0	0	0	0	2	0	0	1	8.92316	8.92316	8.92316	8.92316	8.92316	8.92316	8.92316	8.92316	8.92316
chr11:50724039-50737368+	0	0	0	0	0	0	0	0	0	2	0	0	0	0	0	0	0	0	0	0	0	0	0	0	0	0	0	0	0	0	0	0	0	0	0	0	0	0	0	0	8.92316	8.92316	8.92316	8.92316	8.92316	8.92316	8.92316	8.92316	8.92316
chr11:51271030-51271340+	0	0	0	0	0	0	0	0	0	0	0	0	0	0	0	0	0	0	0	0	0	0	0	0	0	0	0	0	0	0	0	0	0	2	0	0	0	0	0	0	8.92316	8.92316	8.92316	8.92316	8.92316	8.92316	8.92316	8.92316	8.92316
chr11:51271800-51273626+	0	0	0	0	0	0	2	0	0	0	0	0	0	0	0	0	0	0	0	0	0	0	0	0	0	0	0	0	3	0	0	0	0	0	0	0	0	0	0	0	8.92316	8.92316	8.92316	8.92316	8.92316	8.92316	9.90803	8.92316	8.92316
chr11:51696649-51704413-	0	0	0	0	0	0	0	0	0	0	0	0	0	0	0	0	0	0	0	0	0	0	0	0	0	0	0	0	0	0	0	0	0	0	0	2	0	0	0	0	8.92316	8.92316	8.92316	8.92316	8.92316	8.92316	8.92316	8.92316	8.92316
chr11:51696649-51717779-	0	2	0	0	0	0	0	0	0	0	0	0	0	0	0	0	0	0	0	0	0	0	0	0	0	0	0	0	0	0	0	0	0	0	0	0	0	0	0	1	8.92316	9.87826	8.92316	8.92316	8.92316	8.92316	8.92316	8.92316	8.92316
chr11:51708935-51734661-	2	0	0	0	0	0	0	0	0	0	0	0	0	0	0	0	0	0	0	0	0	0	0	0	0	0	1	0	0	0	2	0	3	0	2	0	0	0	0	0	9.7694	8.92316	8.92316	8.92316	8.92316	8.92316	8.92316	8.92316	8.92316
chr11:51712189-51717779-	0	0	0	0	0	0	0	0	0	0	0	0	0	0	0	0	0	0	0	0	0	0	0	0	0	0	0	0	0	0	0	0	0	0	0	2	0	0	0	0	8.92316	8.92316	8.92316	8.92316	8.92316	8.92316	8.92316	8.92316	8.92316
chr11:51721815-51734661-	0	0	0	0	0	0	0	0	0	0	0	0	0	0	0	0	0	0	0	0	0	0	0	0	0	0	0	0	0	0	0	0	0	0	0	0	2	0	0	1	8.92316	8.92316	8.92316	8.92316	8.92316	8.92316	8.92316	8.92316	8.92316
chr11:51726485-51736521-	1	0	0	0	0	0	0	0	0	0	0	0	0	0	0	0	0	0	2	0	0	0	0	0	0	0	0	0	0	0	0	0	0	0	0	0	0	0	0	0	9.40746	8.92316	8.92316	8.92316	8.92316	8.92316	8.92316	8.92316	8.92316
chr11:51729452-51731905-	1	0	0	0	0	0	0	1	0	0	1	0	0	1	0	0	0	0	0	0	2	0	0	0	0	0	0	0	0	0	0	0	0	0	0	0	0	0	0	0	9.40746	8.92316	8.92316	8.92316	8.92316	8.92316	8.92316	9.53126	8.92316
chr11:51729452-51734661-	1	1	1	0	0	0	0	1	0	0	0	0	1	0	0	0	0	0	0	1	0	0	0	1	0	0	0	4	2	0	0	1	0	2	1	0	0	0	0	0	9.40746	9.47834	9.48818	8.92316	8.92316	8.92316	8.92316	9.53126	8.92316
chr11:51729452-51736521-	0	0	0	0	0	0	2	0	0	0	0	0	0	0	0	0	0	0	0	0	0	0	0	0	0	0	0	0	0	0	0	0	0	0	0	0	0	0	0	0	8.92316	8.92316	8.92316	8.92316	8.92316	8.92316	9.90803	8.92316	8.92316
chr11:51734886-51736222-	0	0	0	0	0	0	0	0	0	0	0	3	0	0	0	0	0	0	0	0	0	0	0	0	0	0	0	0	0	0	0	0	0	0	0	0	0	0	0	0	8.92316	8.92316	8.92316	8.92316	8.92316	8.92316	8.92316	8.92316	8.92316
chr11:51736351-51744000-	0	0	0	0	0	0	0	0	0	0	2	0	0	0	0	0	0	0	0	0	0	0	0	0	0	0	0	0	0	0	0	0	0	0	0	0	0	0	0	0	8.92316	8.92316	8.92316	8.92316	8.92316	8.92316	8.92316	8.92316	8.92316
chr11:51743536-51744000-	0	1	0	0	0	1	0	0	0	0	1	0	0	1	0	1	2	1	0	0	0	0	0	0	0	0	0	0	0	0	0	0	0	0	0	1	0	1	0	0	8.92316	9.47834	8.92316	8.92316	8.92316	9.5523	8.92316	8.92316	8.92316
chr11:52113120-52119304+	0	0	0	0	0	0	0	0	0	0	0	0	0	0	0	0	1	0	0	0	0	0	0	0	0	0	0	0	0	0	0	0	0	0	0	3	1	0	0	1	8.92316	8.92316	8.92316	8.92316	8.92316	8.92316	8.92316	8.92316	8.92316
chr11:52113120-52121051+	0	0	0	0	2	0	0	0	0	0	0	0	0	0	0	0	0	0	0	0	0	0	0	0	0	0	1	0	0	0	0	0	0	0	0	0	0	0	0	0	8.92316	8.92316	8.92316	8.92316	9.89321	8.92316	8.92316	8.92316	8.92316
chr11:52113120-52121981+	0	0	2	1	0	0	0	0	0	0	0	0	0	0	0	0	0	0	0	0	0	0	0	0	0	0	0	1	0	0	0	0	0	0	0	0	0	0	0	0	8.92316	8.92316	9.89315	9.48344	8.92316	8.92316	8.92316	8.92316	8.92316
chr11:52117259-52118160+	0	0	0	0	0	0	0	0	0	0	0	2	0	0	0	0	0	0	0	0	0	0	0	0	0	0	0	0	0	0	0	0	0	0	0	0	0	0	0	0	8.92316	8.92316	8.92316	8.92316	8.92316	8.92316	8.92316	8.92316	8.92316
chr11:52117987-52118758+	0	0	0	0	0	0	0	0	0	0	0	0	0	0	0	0	0	0	0	0	0	2	0	0	0	0	0	0	0	0	0	0	0	0	0	1	0	0	0	0	8.92316	8.92316	8.92316	8.92316	8.92316	8.92316	8.92316	8.92316	8.92316
chr11:52117987-52119304+	0	4	0	1	0	1	0	0	2	0	0	0	0	0	0	0	0	0	0	0	0	0	0	0	1	1	0	0	0	0	0	0	0	0	0	0	0	0	0	0	8.92316	10.4479	8.92316	9.48344	8.92316	9.5523	8.92316	8.92316	9.90366
chr11:52117987-52121051+	0	0	0	1	0	0	0	0	1	1	0	0	0	0	0	0	0	0	0	0	0	2	0	0	0	0	0	0	0	0	1	0	0	0	0	0	0	0	0	0	8.92316	8.92316	8.92316	9.48344	8.92316	8.92316	8.92316	8.92316	9.49515
chr11:52236837-52242660+	1	0	0	0	0	0	2	0	0	0	0	0	1	0	0	0	0	0	0	0	1	0	0	0	0	0	0	0	0	0	0	0	0	0	0	0	0	0	0	0	9.40746	8.92316	8.92316	8.92316	8.92316	8.92316	9.90803	8.92316	8.92316
chr11:52236837-52245121+	0	1	0	0	0	1	0	1	0	0	0	0	0	0	1	0	0	1	0	2	5	5	1	0	0	1	0	0	0	3	0	0	2	0	0	0	1	0	0	1	8.92316	9.47834	8.92316	8.92316	8.92316	9.5523	8.92316	9.53126	8.92316
chr11:52374299-52387473+	0	0	0	0	0	0	0	0	0	0	0	0	0	0	0	0	0	0	0	0	0	0	0	0	0	0	0	0	2	0	0	0	0	0	0	0	0	0	0	0	8.92316	8.92316	8.92316	8.92316	8.92316	8.92316	8.92316	8.92316	8.92316
chr11:52403046-52403557+	0	0	0	0	0	0	0	0	0	0	0	0	0	0	0	0	0	0	0	0	0	0	0	0	0	2	0	0	0	0	0	0	0	0	0	0	0	0	0	0	8.92316	8.92316	8.92316	8.92316	8.92316	8.92316	8.92316	8.92316	8.92316
chr11:52407652-52408666+	2	0	0	0	0	0	0	0	0	0	0	0	0	0	0	0	0	0	0	0	0	0	0	0	0	0	0	0	0	0	0	0	0	0	0	0	0	0	0	0	9.7694	8.92316	8.92316	8.92316	8.92316	8.92316	8.92316	8.92316	8.92316
chr11:53265924-53267118-	1	0	1	0	0	0	0	1	0	0	2	0	0	0	0	0	0	0	0	0	0	0	0	0	0	0	0	0	0	0	0	0	0	0	0	0	0	0	0	0	9.40746	8.92316	9.48818	8.92316	8.92316	8.92316	8.92316	9.53126	8.92316
chr11:53269688-53292314-	0	0	0	0	0	0	0	0	0	0	0	0	0	0	0	0	0	0	0	0	0	2	0	0	0	0	0	0	0	0	0	0	0	0	0	0	0	0	0	0	8.92316	8.92316	8.92316	8.92316	8.92316	8.92316	8.92316	8.92316	8.92316
chr11:53280468-53284199-	0	0	0	0	0	0	0	0	0	0	0	0	0	0	0	0	2	0	0	0	0	0	0	0	0	0	0	0	0	0	0	0	0	0	0	0	0	0	0	0	8.92316	8.92316	8.92316	8.92316	8.92316	8.92316	8.92316	8.92316	8.92316
chr11:53280468-53289164+	0	0	0	0	0	0	0	0	0	0	0	0	3	0	0	0	0	0	0	0	0	0	0	0	0	0	0	0	0	0	0	0	0	0	0	0	0	0	0	0	8.92316	8.92316	8.92316	8.92316	8.92316	8.92316	8.92316	8.92316	8.92316
chr11:53280468-53289164-	0	0	0	0	0	0	0	0	0	1	0	0	0	0	0	0	0	1	0	0	0	0	0	2	0	1	0	0	0	0	0	0	0	1	0	1	0	0	2	0	8.92316	8.92316	8.92316	8.92316	8.92316	8.92316	8.92316	8.92316	8.92316
chr11:53280468-53292314-	0	3	0	0	0	0	0	0	0	1	0	0	0	1	0	0	0	1	0	0	0	0	0	0	0	0	1	1	0	0	0	0	0	0	0	0	0	0	0	0	8.92316	10.191	8.92316	8.92316	8.92316	8.92316	8.92316	8.92316	8.92316
chr11:53286853-53289164-	0	0	0	0	0	0	0	0	0	0	0	0	0	0	0	0	0	2	0	0	0	0	0	0	0	0	0	0	0	0	0	0	0	0	0	0	0	0	0	0	8.92316	8.92316	8.92316	8.92316	8.92316	8.92316	8.92316	8.92316	8.92316
chr11:53368075-53389791+	0	0	1	2	0	0	0	0	0	0	0	0	0	0	0	0	0	0	0	0	0	0	0	0	0	0	0	0	0	0	0	0	0	0	0	0	0	0	0	0	8.92316	8.92316	9.48818	9.88598	8.92316	8.92316	8.92316	8.92316	8.92316
chr11:53368660-53375633+	0	0	0	0	0	2	0	0	0	0	0	0	1	0	0	0	0	3	0	0	0	0	1	1	3	0	2	0	0	0	0	0	0	0	0	0	2	0	0	0	8.92316	8.92316	8.92316	8.92316	8.92316	9.98893	8.92316	8.92316	8.92316
chr11:53368660-53380672+	0	0	0	1	0	0	0	3	0	0	1	0	0	1	0	0	0	0	0	0	0	5	0	1	1	0	1	0	2	0	0	0	0	0	2	0	2	1	0	3	8.92316	8.92316	8.92316	9.48344	8.92316	8.92316	8.92316	10.2865	8.92316
chr11:53399589-53402566+	0	1	0	0	0	0	1	0	0	0	0	0	0	0	0	0	0	0	0	0	0	0	0	0	0	0	0	0	0	1	1	0	1	1	0	0	0	1	2	0	8.92316	9.47834	8.92316	8.92316	8.92316	8.92316	9.49805	8.92316	8.92316
chr11:53399589-53404602+	0	0	0	0	0	0	0	0	0	0	0	0	0	0	0	0	0	0	0	0	2	0	3	0	0	3	0	0	0	0	0	1	0	0	0	3	5	2	0	2	8.92316	8.92316	8.92316	8.92316	8.92316	8.92316	8.92316	8.92316	8.92316
chr11:53406581-53409361+	0	2	0	0	0	0	0	0	0	0	0	0	0	0	0	0	0	0	0	0	0	0	0	0	0	0	0	0	0	0	0	0	0	0	0	0	0	0	0	0	8.92316	9.87826	8.92316	8.92316	8.92316	8.92316	8.92316	8.92316	8.92316
chr11:53531996-53537915+	0	0	0	0	0	0	0	0	0	0	0	0	0	0	0	0	0	0	0	0	0	0	0	0	0	0	0	0	0	0	0	0	0	2	0	0	0	0	0	0	8.92316	8.92316	8.92316	8.92316	8.92316	8.92316	8.92316	8.92316	8.92316
chr11:53537154-53537915+	0	0	0	0	0	0	0	0	0	0	2	1	0	0	1	0	0	0	0	0	0	0	0	0	0	0	0	0	0	0	0	0	0	1	0	0	0	0	0	0	8.92316	8.92316	8.92316	8.92316	8.92316	8.92316	8.92316	8.92316	8.92316
[truncated: 12,977 more rows]
[truncated: 41 more columns]
