# Supplementary material for: The circRNA expression profile of colorectal inflammatory cancer transformation revealed potential predictive biomarkers
Source: Aging (Albany NY). 2022 Nov 29;14(22):9280–99. doi: 10.18632/aging.204406 (PMC9740358; doi:10.18632/aging.204406)
Supplement: Additional File 2 [file aging-14-204406-s002.xlsx]

## Sheet: up_0_vs_3
Additional File 2. All comparisons.
Differentially expressed circRNAs for: up_0_vs_3 Fold Change cut-off: 1 P-value cut-off: 1 Column A: CircRNAID, the ID of the identified circRNA by DCC. Column B ~ G: edgeR results for differentially expressed circRNAs. Column H ~ Q: junction reads, the junction read number of each sample. Column R ~ AA: logCPM by edgeR. Column AA ~ AE: the coordinates of circRNA. Column AF: circBaseID, the ident…
	0_vs_3 up regulated circRNAs
	P-value, Fold change and Regulation						junction reads										logCPM by edgeR										Annotations
CircRNAID	logFC	logCPM	F	PValue	FDR	regulation	0-1	0-2	0-3	0-4	0-5	3-1	3-2	3-3	3-4	3-5	0-1	0-2	0-3	0-4	0-5	3-1	3-2	3-3	3-4	3-5	chrom	txStart	txEnd	strand	circBaseID	source	best_transcript	GeneName	Catalog	predicted_sequence_length
chr3:121235043-121235764-	4.36648	9.28023	10.7965	0.00101696	0.450865	up	0	4	7	2	0	0	0	0	0	0	8.92316	10.4479	11.0461	9.88598	8.92316	8.92316	8.92316	8.92316	8.92316	8.92316	chr3	121235042	121235764	-	3_120938682_120937961_-721|18.02|10|20	PMID:25714049	NM_178936	Tmem56	exonic	300
chr15:72999972-73031643-	4.2393	9.3959	10.1062	0.0014778	0.450865	up	1	3	3	3	2	0	0	0	0	0	9.40746	10.191	10.209	10.2004	9.89321	8.92316	8.92316	8.92316	8.92316	8.92316	chr15	72999971	73031643	-	15_72862073_72830402_-31671|23.47|20|53	PMID:25714049	NM_029640	Trappc9	exonic	609
chr5:137151359-137151592-	4.23022	9.40149	10.0621	0.00151357	0.450865	up	2	1	1	1	7	0	0	0	0	0	9.7694	9.47834	9.48818	9.48344	11.0462	8.92316	8.92316	8.92316	8.92316	8.92316	chr5	137151358	137151592	-		novel			intergenic	234
chr5:137152282-137152713-	4.21621	9.35792	10.0444	0.0015282	0.450865	up	3	1	5	1	2	0	0	0	0	0	10.0585	9.47834	10.6874	9.48344	9.89321	8.92316	8.92316	8.92316	8.92316	8.92316	chr5	137152281	137152713	-		novel			intergenic	432
chr11:62146306-62161910+	4.1572	9.38115	9.77007	0.00177385	0.450865	up	7	2	0	1	2	0	0	0	0	0	10.8462	9.87826	8.92316	9.48344	9.89321	8.92316	8.92316	8.92316	8.92316	8.92316	chr11	62146305	62161910	+	mmu_circ_0000271	circBase	NM_001029936	Specc1	exonic	586
chr19:36956371-36973018+	4.14689	9.15038	10.2347	0.00137834	0.450865	up	0	0	5	3	3	0	0	0	0	0	8.92316	8.92316	10.6874	10.2004	10.2091	8.92316	8.92316	8.92316	8.92316	8.92316	chr19	36956370	36973018	+	19_37047508_37030861_-16647|21.02|18|49	PMID:25714049	NM_001080706	Btaf1	exonic	1250
chr13:64243634-64248466-	4.12187	9.24074	9.75182	0.00179154	0.450865	up	1	2	3	4	1	0	0	0	0	0	9.40746	9.87826	10.209	10.4583	9.48822	8.92316	8.92316	8.92316	8.92316	8.92316	chr13	64243633	64248466	-	mmu_circ_0000473	circBase	NM_172587	Cdc14b	sense overlapping	4833
chr3:89007142-89007877+	4.03967	9.23182	9.46431	0.00209518	0.450865	up	6	2	2	1	0	0	0	0	0	0	10.6859	9.87826	9.89315	9.48344	8.92316	8.92316	8.92316	8.92316	8.92316	8.92316	chr3	89007141	89007877	+	3_88811799_88811064_-735|19.52|16|66	PMID:25714049	NM_138679	Ash1l	exonic	736
chr8:67960387-67964354-	3.98408	9.33551	8.96181	0.00275694	0.450865	up	1	6	0	0	3	0	0	0	0	0	9.40746	10.8553	8.92316	8.92316	10.2091	8.92316	8.92316	8.92316	8.92316	8.92316	chr8	67960386	67964354	-	mmu_circ_0001684	circBase	NM_177698	Psd3	exonic	1459
chr6:148782598-148786790-	3.87546	9.1034	9.43731	0.00212625	0.450865	up	0	0	6	3	0	0	0	0	0	0	8.92316	8.92316	10.8779	10.2004	8.92316	8.92316	8.92316	8.92316	8.92316	8.92316	chr6	148782597	148786790	-	6_148735312_148731120_-4192|14.25|2|2	PMID:25714049	NM_001081113	Ipo8	exonic	523
chr12:101678514-101709536-	3.84499	9.27715	8.47357	0.00360358	0.450865	up	1	2	2	3	1	0	0	0	0	0	9.40746	9.87826	9.89315	10.2004	9.48822	8.92316	8.92316	8.92316	8.92316	8.92316	chr12	101678513	101709536	-	12_102947746_102916724_-31022|17.92|5|5	PMID:25714049	NM_028924	Tc2n	exonic	898
chr4:58175931-58179707-	3.82862	9.949	8.25121	0.00407264	0.450865	up	2	1	1	2	3	0	0	0	0	0	9.7694	9.47834	9.48818	9.88598	10.2091	8.92316	8.92316	8.92316	8.92316	8.92316	chr4	58175930	58179707	-	4_58192579_58188803_-3776|20.65|6|12	PMID:25714049	NM_022814	Svep1	exonic	433
chr4:126868717-126877780-	3.78009	9.1127	9.09537	0.00256268	0.450865	up	4	4	0	0	1	0	0	0	0	0	10.2992	10.4479	8.92316	8.92316	9.48822	8.92316	8.92316	8.92316	8.92316	8.92316	chr4	126868716	126877780	-	4_126555024_126545961_-9063|18.06|12|16	PMID:25714049	NM_001114399	Zmym4	exonic	513
chr5:100369596-100388611-	3.70899	9.21013	8.14208	0.00432512	0.450865	up	0	0	3	5	0	0	0	0	0	0	8.92316	8.92316	10.209	10.6771	8.92316	8.92316	8.92316	8.92316	8.92316	8.92316	chr5	100369595	100388611	-		novel	NM_026969	Sec31a	exonic	1453
chr1:160722133-160740931-	3.70253	9.35571	7.70411	0.00550971	0.450865	up	0	2	2	2	2	0	0	0	0	0	8.92316	9.87826	9.89315	9.88598	9.89321	8.92316	8.92316	8.92316	8.92316	8.92316	chr1	160722132	160740931	-	1_162671062_162652264_-18798|19.18|16|63	PMID:25714049	NM_013862	Rabgap1l	exonic	1028
chr3:115978644-115984974-	3.69266	9.52998	7.39631	0.00653598	0.450865	up	0	6	0	0	2	0	0	0	0	0	8.92316	10.8553	8.92316	8.92316	9.89321	8.92316	8.92316	8.92316	8.92316	8.92316	chr3	115978643	115984974	-	3_115687892_115681562_-6330|20.06|12|24	PMID:25714049	NM_023214	Slc30a7	exonic	337
chr2:24847944-24877626-	3.66349	9.27167	7.76322	0.00533226	0.450865	up	2	3	2	1	0	0	0	0	0	0	9.7694	10.191	9.89315	9.48344	8.92316	8.92316	8.92316	8.92316	8.92316	8.92316	chr2	24847943	24877626	-	2_24733146_24703464_-29682|14.57|16|24	PMID:25714049	NM_172545	Ehmt1	exonic	981
chr17:13803939-13810570+	3.66092	9.11833	8.61056	0.00334233	0.450865	up	2	3	1	2	0	0	0	0	0	0	9.7694	10.191	9.48818	9.88598	8.92316	8.92316	8.92316	8.92316	8.92316	8.92316	chr17	13803938	13810570	+	17_13947577_13940946_-6631|18.74|8|10	PMID:25714049	NM_010806	Mllt4	exonic	634
chr7:73490479-73519708-	3.6584	9.14616	8.3331	0.00389307	0.450865	up	2	4	0	2	0	0	0	0	0	0	9.7694	10.4479	8.92316	9.88598	8.92316	8.92316	8.92316	8.92316	8.92316	8.92316	chr7	73490478	73519708	-	7_80664594_80635365_-29229|12.39|10|21	PMID:25714049	NM_001081345	Chd2	exonic	1938
chr5:143089743-143090929-	3.64666	9.36908	7.48624	0.00621743	0.450865	up	3	2	1	2	0	0	0	0	0	0	10.0585	9.87826	9.48818	9.88598	8.92316	8.92316	8.92316	8.92316	8.92316	8.92316	chr5	143089742	143090929	-	5_143852608_143851422_-1186|13.12|5|7	PMID:25714049	NM_207110	Rnf216	exonic	887
chr16:91926459-91926982-	3.62018	9.10145	8.52744	0.00349845	0.450865	up	4	0	1	2	1	0	0	0	0	0	10.2992	8.92316	9.48818	9.88598	9.48822	8.92316	8.92316	8.92316	8.92316	8.92316	chr16	91926458	91926982	-	16_91927227_91926704_-523|15.67|8|11	PMID:25714049	NM_138597	Atp5o	exonic	243
chr11:4527836-4531305-	3.59762	9.11306	8.42534	0.00370042	0.450865	up	5	0	1	1	1	0	0	0	0	0	10.5055	8.92316	9.48818	9.48344	9.48822	8.92316	8.92316	8.92316	8.92316	8.92316	chr11	4527835	4531305	-	11_4431308_4427839_-3469|14.60|13|32	PMID:25714049	NM_028860	Mtmr3	exonic	291
chr17:66080811-66091929-	3.54069	9.04092	8.17615	0.00424464	0.450865	up	0	0	3	4	0	0	0	0	0	0	8.92316	8.92316	10.209	10.4583	8.92316	8.92316	8.92316	8.92316	8.92316	8.92316	chr17	66080810	66091929	-		novel	NM_028388	Ndufv2	exonic	602
chr16:4137366-4155033-	3.53609	9.13556	7.97945	0.00473131	0.450865	up	0	0	4	3	0	0	0	0	0	0	8.92316	8.92316	10.468	10.2004	8.92316	8.92316	8.92316	8.92316	8.92316	8.92316	chr16	4137365	4155033	-	16_4155033_4137366_-17667|20.33|17|40	PMID:25714049	NM_001025432	Crebbp	exonic	532
chr9:96718210-96732313-	3.5345	9.13565	7.97321	0.00474762	0.450865	up	0	1	4	2	0	0	0	0	0	0	8.92316	9.47834	10.468	9.88598	8.92316	8.92316	8.92316	8.92316	8.92316	8.92316	chr9	96718209	96732313	-		novel	uc009rcs.2	Zbtb38	exonic	617
chr5:147450653-147503202+	3.53312	9.07545	8.31521	0.0039316	0.450865	up	0	3	1	1	2	0	0	0	0	0	8.92316	10.191	9.48818	9.48344	9.89321	8.92316	8.92316	8.92316	8.92316	8.92316	chr5	147450652	147503202	+	5_148314778_148262229_-52549|11.54|11|19	PMID:25714049	NM_028291	Pan3	sense overlapping	52550
chr2:121347264-121347642-	3.53239	9.21708	7.42651	0.0064272	0.450865	up	0	0	1	3	3	0	0	0	0	0	8.92316	8.92316	9.48818	10.2004	10.2091	8.92316	8.92316	8.92316	8.92316	8.92316	chr2	121347263	121347642	-	2_121173378_121173000_-378|17.80|14|29	PMID:25714049	NM_178795	Ppip5k1	exonic	284
chr15:75864051-75866127+	3.5311	9.14086	7.90303	0.00493538	0.450865	up	0	3	3	0	1	0	0	0	0	0	8.92316	10.191	10.209	8.92316	9.48822	8.92316	8.92316	8.92316	8.92316	8.92316	chr15	75864050	75866127	+		novel	NM_026960	Gsdmd	sense overlapping	2077
chr3:104080137-104105847-	3.52732	9.08861	8.28555	0.00399634	0.450865	up	0	4	0	2	1	0	0	0	0	0	8.92316	10.4479	8.92316	9.88598	9.48822	8.92316	8.92316	8.92316	8.92316	8.92316	chr3	104080136	104105847	-		novel	NM_133853	Magi3	exonic	705
chr5:88934749-88954957+	3.52571	9.24628	7.28196	0.00696527	0.450865	up	0	2	1	3	1	0	0	0	0	0	8.92316	9.87826	9.48818	10.2004	9.48822	8.92316	8.92316	8.92316	8.92316	8.92316	chr5	88934748	88954957	+	5_89383982_89363774_-20208|17.46|12|26	PMID:25714049	NM_018760	Slc4a4	exonic	254
chr16:33534864-33551114+	3.52501	9.22703	7.35824	0.00667583	0.450865	up	0	3	2	2	0	0	0	0	0	0	8.92316	10.191	9.89315	9.88598	8.92316	8.92316	8.92316	8.92316	8.92316	8.92316	chr16	33534863	33551114	+	16_33551200_33534950_-16250|18.17|2|4	PMID:25714049	NM_134251	Slc12a8	exonic	571
chr19:4320152-4321056-	3.525	9.22991	7.34641	0.00671989	0.450865	up	0	2	1	4	0	0	0	0	0	0	8.92316	9.87826	9.48818	10.4583	8.92316	8.92316	8.92316	8.92316	8.92316	8.92316	chr19	4320151	4321056	-	19_4321056_4320152_-904|20.74|17|59	PMID:25714049	NM_001001984	Kdm2a	exonic	375
chr11:108434126-108472094+	3.52471	9.31249	7.0741	0.00782085	0.450865	up	0	2	3	2	0	0	0	0	0	0	8.92316	9.87826	10.209	9.88598	8.92316	8.92316	8.92316	8.92316	8.92316	8.92316	chr11	108434125	108472094	+	mmu_circ_0002746	circBase	NM_029606	Cep112	exonic	647
chr13:97141927-97150413+	3.52442	9.32106	7.05442	0.00790722	0.450865	up	0	2	3	2	0	0	0	0	0	0	8.92316	9.87826	10.209	9.88598	8.92316	8.92316	8.92316	8.92316	8.92316	8.92316	chr13	97141926	97150413	+	mmu_circ_0000492	circBase	NM_177266	Gfm2	exonic	540
chrX:112661751-112664322-	3.51353	9.13596	7.90095	0.00494105	0.450865	up	1	0	3	1	2	0	0	0	0	0	9.40746	8.92316	10.209	9.48344	9.89321	8.92316	8.92316	8.92316	8.92316	8.92316	chrX	112661750	112664322	-		novel	NM_181579	Pof1b	exonic	305
chr11:55225966-55233656+	3.50922	9.3454	6.94994	0.00838243	0.450865	up	1	0	2	1	3	0	0	0	0	0	9.40746	8.92316	9.89315	9.48344	10.2091	8.92316	8.92316	8.92316	8.92316	8.92316	chr11	55225965	55233656	+		novel	NM_153139	Slc36a1	sense overlapping	7691
chr9:57019904-57036811+	3.50894	9.13193	7.9283	0.00486693	0.450865	up	1	2	0	0	4	0	0	0	0	0	9.40746	9.87826	8.92316	8.92316	10.468	8.92316	8.92316	8.92316	8.92316	8.92316	chr9	57019903	57036811	+	9_56884618_56867711_-16907|17.22|8|18	PMID:25714049	NM_019651	Ptpn9	exonic	905
chr14:78982236-79009279+	3.50631	9.20995	7.37672	0.00660758	0.450865	up	1	1	1	3	1	0	0	0	0	0	9.40746	9.47834	9.48818	10.2004	9.48822	8.92316	8.92316	8.92316	8.92316	8.92316	chr14	78982235	79009279	+	14_79409086_79382043_-27043|18.02|2|2	PMID:25714049	NM_027906	Vwa8	exonic	638
chr5:138092920-138094139+	3.50552	9.27192	7.13372	0.007565	0.450865	up	1	0	1	5	0	0	0	0	0	0	9.40746	8.92316	9.48818	10.6771	8.92316	8.92316	8.92316	8.92316	8.92316	8.92316	chr5	138092919	138094139	+	5_138535367_138534148_-1219|19.37|11|35	PMID:25714049	NM_133906	Zkscan1	exonic	661
chr7:90160448-90165616+	3.50473	9.21876	7.32801	0.00678904	0.450865	up	1	2	2	2	0	0	0	0	0	0	9.40746	9.87826	9.89315	9.88598	8.92316	8.92316	8.92316	8.92316	8.92316	8.92316	chr7	90160447	90165616	+	7_97314126_97308958_-5168|17.79|11|11	PMID:25714049	NM_146194	Picalm	exonic	322
chr12:64976695-64997045+	3.5026	9.28303	7.0782	0.00780298	0.450865	up	1	3	2	1	0	0	0	0	0	0	9.40746	10.191	9.89315	9.48344	8.92316	8.92316	8.92316	8.92316	8.92316	8.92316	chr12	64976694	64997045	+	12_66098032_66077682_-20350|17.81|14|21	PMID:25714049	NM_177805	Fam179b	exonic	1615
chr3:145013848-145015664-	3.48799	9.18282	7.46085	0.00630572	0.450865	up	2	0	4	1	0	0	0	0	0	0	9.7694	8.92316	10.468	9.48344	8.92316	8.92316	8.92316	8.92316	8.92316	8.92316	chr3	145013847	145015664	-		novel	NM_017474	Clca1	sense overlapping	1817
chr4:86788825-86803052+	3.48744	9.08775	8.1632	0.00427504	0.450865	up	2	0	2	1	2	0	0	0	0	0	9.7694	8.92316	9.89315	9.48344	9.89321	8.92316	8.92316	8.92316	8.92316	8.92316	chr4	86788824	86803052	+	4_86448956_86434729_-14227|17.04|9|15	PMID:25714049	NM_184088	Dennd4c	exonic	913
chr10:25441573-25495591+	3.48435	9.11095	8.00163	0.0046737	0.450865	up	2	1	2	1	1	0	0	0	0	0	9.7694	9.47834	9.89315	9.48344	9.48822	8.92316	8.92316	8.92316	8.92316	8.92316	chr10	25441572	25495591	+		novel	NM_013511	Epb4.1l2	exonic	2006
chr3:109525869-109528384+	3.48374	9.45472	6.65909	0.00986541	0.450865	up	2	3	0	0	2	0	0	0	0	0	9.7694	10.191	8.92316	8.92316	9.89321	8.92316	8.92316	8.92316	8.92316	8.92316	chr3	109525868	109528384	+	3_109331302_109328787_-2515|14.00|17|68	PMID:25714049	NM_020505	Vav3	exonic	329
chr9:80087430-80123946+	3.48296	9.13031	7.85964	0.00505522	0.450865	up	2	2	0	0	3	0	0	0	0	0	9.7694	9.87826	8.92316	8.92316	10.2091	8.92316	8.92316	8.92316	8.92316	8.92316	chr9	80087429	80123946	+	mmu_circ_0015921	circBase	NM_146003	Senp6	exonic	1859
chr7:28328703-28330645-	3.48275	9.11449	7.97957	0.00473099	0.450865	up	2	2	0	0	3	0	0	0	0	0	9.7694	9.87826	8.92316	8.92316	10.2091	8.92316	8.92316	8.92316	8.92316	8.92316	chr7	28328702	28330645	-	7_29115664_29113722_-1942|18.94|10|13	PMID:25714049	NM_013676	Supt5	exonic	383
chr4:9594663-9610938-	3.48116	9.20636	7.31172	0.00685082	0.450865	up	2	1	0	4	0	0	0	0	0	0	9.7694	9.47834	8.92316	10.4583	8.92316	8.92316	8.92316	8.92316	8.92316	8.92316	chr4	9594662	9610938	-	4_9538085_9521810_-16275|12.32|7|12	PMID:25714049	NM_023066	Asph	exonic	531
chr7:101177144-101198609+	3.48001	9.2278	7.20993	0.00725033	0.450865	up	2	2	0	3	0	0	0	0	0	0	9.7694	9.87826	8.92316	10.2004	8.92316	8.92316	8.92316	8.92316	8.92316	8.92316	chr7	101177143	101198609	+	7_108347123_108325658_-21465|18.36|13|25	PMID:25714049	NM_199012	Fchsd2	exonic	540
chr17:84443818-84444509-	3.47966	9.11745	7.95248	0.00480232	0.450865	up	2	2	1	2	0	0	0	0	0	0	9.7694	9.87826	9.48818	9.88598	8.92316	8.92316	8.92316	8.92316	8.92316	8.92316	chr17	84443817	84444509	-	17_84843849_84843158_-691|16.95|7|8	PMID:25714049	NM_183021	Thada	exonic	692
chr2:156264281-156276668+	3.46509	9.27953	6.97313	0.00827448	0.450865	up	3	1	3	0	0	0	0	0	0	0	10.0585	9.47834	10.209	8.92316	8.92316	8.92316	8.92316	8.92316	8.92316	8.92316	chr2	156264280	156276668	+	2_156102404_156090017_-12387|15.86|8|17	PMID:25714049	NM_172674	Phf20	exonic	951
chr8:85896430-85901957+	3.46018	9.10089	7.9544	0.00479724	0.450865	up	3	0	3	1	0	0	0	0	0	0	10.0585	8.92316	10.209	9.48344	8.92316	8.92316	8.92316	8.92316	8.92316	8.92316	chr8	85896429	85901957	+	8_88425856_88420329_-5527|19.84|6|7	PMID:25714049	NM_199446	Phkb	exonic	189
chr17:79650302-79672573+	3.45859	9.24575	7.06769	0.00784888	0.450865	up	3	3	1	0	0	0	0	0	0	0	10.0585	10.191	9.48818	8.92316	8.92316	8.92316	8.92316	8.92316	8.92316	8.92316	chr17	79650301	79672573	+	17_80071913_80049642_-22271|16.60|18|35	PMID:25714049	NM_201361	Rmdn2	exonic	727
chr2:73842360-73846375-	3.44	9.20576	7.18325	0.00735897	0.450865	up	4	0	2	1	0	0	0	0	0	0	10.2992	8.92316	9.89315	9.48344	8.92316	8.92316	8.92316	8.92316	8.92316	8.92316	chr2	73842359	73846375	-	2_73684432_73680417_-4015|15.81|6|8	PMID:25714049	NM_009715	Atf2	exonic	381
chr5:67729792-67776198-	3.43763	9.14593	7.53938	0.00603669	0.450865	up	4	0	2	0	1	0	0	0	0	0	10.2992	8.92316	9.89315	8.92316	9.48822	8.92316	8.92316	8.92316	8.92316	8.92316	chr5	67729791	67776198	-	5_68167437_68121031_-46406|11.37|6|6	PMID:25714049	NM_009727	Atp8a1	exonic	1378
chr5:113865639-113882157-	3.434	9.22455	7.07705	0.00780797	0.450865	up	4	3	0	0	0	0	0	0	0	0	10.2992	10.191	8.92316	8.92316	8.92316	8.92316	8.92316	8.92316	8.92316	8.92316	chr5	113865638	113882157	-	5_114332166_114315648_-16518|21.59|4|5	PMID:25714049	NM_011779	Coro1c	exonic	323
chr11:95876098-95891973-	3.34286	9.04148	7.60824	0.00585474	0.450865	up	0	0	4	1	1	0	0	0	0	0	8.92316	8.92316	10.468	9.48344	9.48822	8.92316	8.92316	8.92316	8.92316	8.92316	chr11	95876097	95891973	-		novel	NM_008081	B4galnt2	exonic	680
chr14:34679800-34679990+	3.34198	9.07452	7.6759	0.00585474	0.450865	up	0	0	3	0	3	0	0	0	0	0	8.92316	8.92316	10.209	8.92316	10.2091	8.92316	8.92316	8.92316	8.92316	8.92316	chr14	34679799	34679990	+		novel	ENSMUST00000048263	Wapal	intronic	191
chr11:83484651-83485079+	3.33667	9.09143	7.59758	0.00585474	0.450865	up	0	1	3	0	2	0	0	0	0	0	8.92316	9.47834	10.209	8.92316	9.89321	8.92316	8.92316	8.92316	8.92316	8.92316	chr11	83484650	83485079	+	11_83298581_83298153_-428|18.82|3|3	PMID:25714049	NM_027427	Taf15	exonic	240
chr5:21670489-21683465-	3.33187	9.05542	7.60469	0.00585474	0.450865	up	0	3	0	0	3	0	0	0	0	0	8.92316	10.191	8.92316	8.92316	10.2091	8.92316	8.92316	8.92316	8.92316	8.92316	chr5	21670488	21683465	-	mmu_circ_0001324	circBase	NM_178728	Napepld	exonic	1072
chr12:51774651-51776630-	3.33125	9.0931	7.55801	0.00597459	0.450865	up	0	1	2	3	0	0	0	0	0	0	8.92316	9.47834	9.89315	10.2004	8.92316	8.92316	8.92316	8.92316	8.92316	8.92316	chr12	51774650	51776630	-	12_52877617_52875638_-1979|13.09|10|11	PMID:25714049	NM_144788	Hectd1	exonic	275
chr4:32694494-32695565+	3.33065	9.16735	6.99245	0.00818565	0.450865	up	0	0	3	3	0	0	0	0	0	0	8.92316	8.92316	10.209	10.2004	8.92316	8.92316	8.92316	8.92316	8.92316	8.92316	chr4	32694493	32695565	+	4_32782540_32781469_-1071|13.35|8|12	PMID:25714049	NM_001081392	Mdn1	exonic	388
chr9:15308525-15311695+	3.32966	9.15313	7.07782	0.00780462	0.450865	up	0	1	1	2	2	0	0	0	0	0	8.92316	9.47834	9.48818	9.88598	9.89321	8.92316	8.92316	8.92316	8.92316	8.92316	chr9	15308524	15311695	+	9_15116139_15112969_-3170|15.91|3|6	PMID:25714049	NM_029248	Taf1d	exonic	788
chr7:34284702-34285953-	3.32949	9.15697	7.05616	0.00789953	0.450865	up	0	1	0	2	3	0	0	0	0	0	8.92316	9.47834	8.92316	9.88598	10.2091	8.92316	8.92316	8.92316	8.92316	8.92316	chr7	34284701	34285953	-	7_35070972_35069721_-1251|21.73|7|7	PMID:25714049	ENSMUST00000108074	4931406P16Rik	exonic	1252
chr9:38733020-38733209+	3.32747	9.20397	6.73739	0.00944151	0.450865	up	0	0	2	4	0	0	0	0	0	0	8.92316	8.92316	9.89315	10.4583	8.92316	8.92316	8.92316	8.92316	8.92316	8.92316	chr9	38733019	38733209	+		novel	ENSMUST00000001544	Vwa5a	intronic	190
chr11:93905163-93912458+	3.32386	9.36295	6.20422	0.0127449	0.450865	up	0	0	4	2	0	0	0	0	0	0	8.92316	8.92316	10.468	9.88598	8.92316	8.92316	8.92316	8.92316	8.92316	8.92316	chr11	93905162	93912458	+	mmu_circ_0003551	circBase	NM_134012	Mbtd1	sense overlapping	7296
chr2:32182458-32187553+	3.32209	9.30124	6.33656	0.0118277	0.450865	up	0	2	2	1	1	0	0	0	0	0	8.92316	9.87826	9.89315	9.48344	9.48822	8.92316	8.92316	8.92316	8.92316	8.92316	chr2	32182457	32187553	+	2_32043073_32037978_-5095|18.32|17|38	PMID:25714049	NM_172661	Prrc2b	exonic	523
chr10:117349311-117367988-	3.32173	9.27168	6.4411	0.0111513	0.450865	up	0	2	1	2	1	0	0	0	0	0	8.92316	9.87826	9.48818	9.88598	9.48822	8.92316	8.92316	8.92316	8.92316	8.92316	chr10	117349310	117367988	-	10_116805044_116786367_-18677|13.57|9|15	PMID:25714049	NM_001013391	Cpsf6	sense overlapping	18678
chr5:89170751-89179844+	3.31175	9.0407	7.52237	0.00609393	0.450865	up	1	0	4	0	1	0	0	0	0	0	9.40746	8.92316	10.468	8.92316	9.48822	8.92316	8.92316	8.92316	8.92316	8.92316	chr5	89170750	89179844	+	5_89608869_89599776_-9093|17.63|7|17	PMID:25714049	NM_018760	Slc4a4	exonic	263
chr2:120806759-120825315-	3.29482	9.1834	6.75565	0.00934538	0.450865	up	1	4	1	0	0	0	0	0	0	0	9.40746	10.4479	9.48818	8.92316	8.92316	8.92316	8.92316	8.92316	8.92316	8.92316	chr2	120806758	120825315	-	mmu_circ_0001063	circBase	NM_080788	Ttbk2	exonic	358
chr10:40254264-40254464-	3.27592	9.03697	7.40738	0.00649588	0.450865	up	2	0	2	1	1	0	0	0	0	0	9.7694	8.92316	9.89315	9.48344	9.48822	8.92316	8.92316	8.92316	8.92316	8.92316	chr10	40254263	40254464	-	mmu_circ_0000159	circBase	NM_026113	Gtf3c6	exonic	109
chr9:64835954-64839144+	3.2752	9.36736	6.05217	0.0138895	0.450865	up	2	3	0	0	1	0	0	0	0	0	9.7694	10.191	8.92316	8.92316	9.48822	8.92316	8.92316	8.92316	8.92316	8.92316	chr9	64835953	64839144	+	9_64686951_64683761_-3190|15.98|18|46	PMID:25714049	NM_001162917	Dennd4a	exonic	460
chr5:112941633-112961648-	3.27389	9.0374	7.40529	0.00650345	0.450865	up	2	0	2	2	0	0	0	0	0	0	9.7694	8.92316	9.89315	9.88598	8.92316	8.92316	8.92316	8.92316	8.92316	8.92316	chr5	112941632	112961648	-	5_113390668_113370653_-20015|20.18|7|11	PMID:25714049	NM_177078	Adrbk2	exonic	611
chr1:143667625-143677855-	3.27374	9.42408	5.92946	0.0148901	0.450865	up	2	4	0	0	0	0	0	0	0	0	9.7694	10.4479	8.92316	8.92316	8.92316	8.92316	8.92316	8.92316	8.92316	8.92316	chr1	143667624	143677855	-	1_145524985_145514755_-10230|17.78|19|121	PMID:25714049	NM_145991	Cdc73	exonic	460
chr9:62912750-62923655-	3.25837	9.39864	5.93707	0.014826	0.450865	up	3	1	1	1	0	0	0	0	0	0	10.0585	9.47834	9.48818	9.48344	8.92316	8.92316	8.92316	8.92316	8.92316	8.92316	chr9	62912749	62923655	-	mmu_circ_0001788	circBase	NM_019663	Pias1	exonic	465
chr5:23450152-23467188+	3.25037	9.18665	6.59883	0.0102048	0.450865	up	3	0	1	2	0	0	0	0	0	0	10.0585	8.92316	9.48818	9.88598	8.92316	8.92316	8.92316	8.92316	8.92316	8.92316	chr5	23450151	23467188	+	5_22973006_22955970_-17036|21.42|6|7	PMID:25714049	NM_026984	Kmt2e	exonic	611
chr10:59192166-59192815-	3.24916	9.16573	6.75656	0.0093406	0.450865	up	3	1	2	0	0	0	0	0	0	0	10.0585	9.47834	9.89315	8.92316	8.92316	8.92316	8.92316	8.92316	8.92316	8.92316	chr10	59192165	59192815	-	10_58655563_58654914_-649|21.59|16|39	PMID:25714049	NM_001024910	Sept10	exonic	314
chr17:6201700-6207057+	3.2478	9.11404	7.16893	0.00741792	0.450865	up	3	0	2	1	0	0	0	0	0	0	10.0585	8.92316	9.89315	9.48344	8.92316	8.92316	8.92316	8.92316	8.92316	8.92316	chr17	6201699	6207057	+	17_6207057_6201700_-5357|20.66|3|3	PMID:25714049	NM_054040	Tulp4	exonic	302
chr1:160733529-160740931-	3.24456	9.1462	6.85275	0.00885072	0.450865	up	3	2	1	0	0	0	0	0	0	0	10.0585	9.87826	9.48818	8.92316	8.92316	8.92316	8.92316	8.92316	8.92316	8.92316	chr1	160733528	160740931	-	1_162671062_162663660_-7402|17.17|3|3	PMID:25714049	NM_013862	Rabgap1l	exonic	759
chr13:100716501-100719370-	3.24119	9.03547	7.30535	0.00687517	0.450865	up	3	0	1	1	1	0	0	0	0	0	10.0585	8.92316	9.48818	9.48344	9.48822	8.92316	8.92316	8.92316	8.92316	8.92316	chr13	100716500	100719370	-	13_101489325_101486456_-2869|23.26|11|20	PMID:25714049	NM_009874	Cdk7	exonic	299
chr1:92148256-92148494-	3.21887	9.16036	6.70188	0.00963139	0.450865	up	4	1	0	1	0	0	0	0	0	0	10.2992	9.47834	8.92316	9.48344	8.92316	8.92316	8.92316	8.92316	8.92316	8.92316	chr1	92148255	92148494	-	mmu_circ_0000064	circBase	uc007cbf.2	Hdac4	exonic	239
chr3:136797726-136797926+	3.1969	9.18624	6.44571	0.0111223	0.450865	up	5	0	0	1	0	0	0	0	0	0	10.5055	8.92316	8.92316	9.48344	8.92316	8.92316	8.92316	8.92316	8.92316	8.92316	chr3	136797725	136797926	+	3_136460890_136460690_-200|21.46|14|46	PMID:25714049	NM_008913	Ppp3ca	exonic	201
chr2:103791117-103791355-	3.19091	9.12904	6.88034	0.00871514	0.450865	up	5	0	0	0	1	0	0	0	0	0	10.5055	8.92316	8.92316	8.92316	9.48822	8.92316	8.92316	8.92316	8.92316	8.92316	chr2	103791116	103791355	-		novel	ENSMUST00000028607	Caprin1	intronic	239
chr16:32952057-32961744+	3.1751	9.05068	7.14792	0.00750533	0.450865	up	5	0	0	0	1	0	0	0	0	0	10.5055	8.92316	8.92316	8.92316	9.48822	8.92316	8.92316	8.92316	8.92316	8.92316	chr16	32952056	32961744	+	16_32961830_32952143_-9687|14.45|9|15	PMID:25714049	NM_001081255	Lrch3	exonic	480
chr3:30680879-30681072-	3.11164	9.00858	6.72752	0.0118797	0.450865	up	0	0	0	0	5	0	0	0	0	0	8.92316	8.92316	8.92316	8.92316	10.6875	8.92316	8.92316	8.92316	8.92316	8.92316	chr3	30680878	30681072	-		novel	ENSMUST00000126658	Lrrc31	sense overlapping	194
chr5:29334420-29346906-	3.10918	9.00847	6.7255	0.0118797	0.450865	up	0	0	4	1	0	0	0	0	0	0	8.92316	8.92316	10.468	9.48344	8.92316	8.92316	8.92316	8.92316	8.92316	8.92316	chr5	29334419	29346906	-	5_29673446_29660960_-12486|20.40|2|2	PMID:25714049	NM_020295	Lmbr1	sense overlapping	12487
chr8:76974048-76974373+	3.10918	9.00847	6.7255	0.0118797	0.450865	up	0	0	4	1	0	0	0	0	0	0	8.92316	8.92316	10.468	9.48344	8.92316	8.92316	8.92316	8.92316	8.92316	8.92316	chr8	76974047	76974373	+		novel	ENSMUST00000034031	Nr3c2	intronic	326
chr2:179931980-179939954-	3.10918	9.00847	6.7255	0.0118797	0.450865	up	0	0	4	1	0	0	0	0	0	0	8.92316	8.92316	10.468	9.48344	8.92316	8.92316	8.92316	8.92316	8.92316	8.92316	chr2	179931979	179939954	-	2_179674659_179666685_-7974|16.42|2|2	PMID:25714049	NM_001081092	Taf4a	exonic	860
chr2:112354174-112355144+	3.10895	9.04091	6.94416	0.0118797	0.450865	up	0	0	5	0	0	0	0	0	0	0	8.92316	8.92316	10.6874	8.92316	8.92316	8.92316	8.92316	8.92316	8.92316	8.92316	chr2	112354173	112355144	+	2_112195301_112194331_-970|17.77|7|8	PMID:25714049	NM_133648	Slc12a6	exonic	366
chr2:167434782-167451350+	3.10681	9.00836	6.72355	0.0118797	0.450865	up	0	0	3	2	0	0	0	0	0	0	8.92316	8.92316	10.209	9.88598	8.92316	8.92316	8.92316	8.92316	8.92316	8.92316	chr2	167434781	167451350	+		novel	NM_148929	Slc9a8	exonic	505
chr9:86372341-86440754-	3.10579	9.02588	6.79031	0.0118797	0.450865	up	0	0	2	2	1	0	0	0	0	0	8.92316	8.92316	9.89315	9.88598	9.48822	8.92316	8.92316	8.92316	8.92316	8.92316	chr9	86372340	86440754	-	9_86334361_86265948_-68413|22.19|17|67	PMID:25714049	NM_027394	Ube2cbp	exonic	721
chr6:115383679-115451082+	3.10576	9.02617	6.79608	0.0118797	0.450865	up	0	0	2	2	1	0	0	0	0	0	8.92316	8.92316	9.89315	9.88598	9.48822	8.92316	8.92316	8.92316	8.92316	8.92316	chr6	115383678	115451082	+		novel	NM_001127330	Pparg	exonic	602
chr9:58623687-58640802+	3.10566	9.02607	6.79388	0.0118797	0.450865	up	0	1	0	0	4	0	0	0	0	0	8.92316	9.47834	8.92316	8.92316	10.468	8.92316	8.92316	8.92316	8.92316	8.92316	chr9	58623686	58640802	+	9_58488609_58471494_-17115|15.62|3|4	PMID:25714049	NM_009145	Nptn	exonic	398
chr4:63461282-63472868-	3.10483	9.03661	6.92114	0.0118797	0.450865	up	0	0	3	2	0	0	0	0	0	0	8.92316	8.92316	10.209	9.88598	8.92316	8.92316	8.92316	8.92316	8.92316	8.92316	chr4	63461281	63472868	-		novel	NM_028640	Whrn	exonic	345
chr9:113889958-113899599+	3.10447	9.00825	6.72161	0.0118797	0.450865	up	0	0	1	3	1	0	0	0	0	0	8.92316	8.92316	9.48818	10.2004	9.48822	8.92316	8.92316	8.92316	8.92316	8.92316	chr9	113889957	113899599	+	9_113808717_113799076_-9641|14.80|5|6	PMID:25714049	NM_029633	Clasp2	exonic	531
chr11:83977080-83994462+	3.10445	9.00825	6.7216	0.0118797	0.450865	up	0	0	2	3	0	0	0	0	0	0	8.92316	8.92316	9.89315	10.2004	8.92316	8.92316	8.92316	8.92316	8.92316	8.92316	chr11	83977079	83994462	+	11_83807964_83790582_-17382|11.68|2|2	PMID:25714049	ENSMUST00000049714	Synrg	exonic	1363
chr18:10584248-10596441-	3.10445	9.00825	6.7216	0.0118797	0.450865	up	0	0	2	3	0	0	0	0	0	0	8.92316	8.92316	9.89315	10.2004	8.92316	8.92316	8.92316	8.92316	8.92316	8.92316	chr18	10584247	10596441	-		novel	NM_001081222	Esco1	exonic	2524
chr4:108623451-108628708+	3.10427	9.04131	6.93231	0.0118797	0.450865	up	0	1	4	0	0	0	0	0	0	0	8.92316	9.47834	10.468	8.92316	8.92316	8.92316	8.92316	8.92316	8.92316	8.92316	chr4	108623450	108628708	+		novel	NM_177045	Cc2d1b	exonic	1800
chr4:116304201-116304367-	3.10207	9.00814	6.71963	0.0118797	0.450865	up	0	0	1	4	0	0	0	0	0	0	8.92316	8.92316	9.48818	10.4583	8.92316	8.92316	8.92316	8.92316	8.92316	8.92316	chr4	116304200	116304367	-		novel			intergenic	167
chrX:48361533-48393299+	3.10207	9.00814	6.71963	0.0118797	0.450865	up	0	0	1	4	0	0	0	0	0	0	8.92316	8.92316	9.48818	10.4583	8.92316	8.92316	8.92316	8.92316	8.92316	8.92316	chrX	48361532	48393299	+		novel	NM_178782	Bcorl1	exonic	4878
chr2:70757474-70786995-	3.10178	9.00813	6.71942	0.0118797	0.450865	up	0	2	0	0	3	0	0	0	0	0	8.92316	9.87826	8.92316	8.92316	10.2091	8.92316	8.92316	8.92316	8.92316	8.92316	chr2	70757473	70786995	-	2_70625052_70595531_-29521|21.80|3|3	PMID:25714049	NM_172664	Tlk1	exonic	267
chr5:65143262-65144755+	3.10178	9.00813	6.71942	0.0118797	0.450865	up	0	2	0	0	3	0	0	0	0	0	8.92316	9.87826	8.92316	8.92316	10.2091	8.92316	8.92316	8.92316	8.92316	8.92316	chr5	65143261	65144755	+		novel	NM_175174	Klhl5	sense overlapping	1494
chr1:134463827-134475902+	3.10174	9.00813	6.71939	0.0118797	0.450865	up	0	2	2	0	1	0	0	0	0	0	8.92316	9.87826	9.89315	8.92316	9.48822	8.92316	8.92316	8.92316	8.92316	8.92316	chr1	134463826	134475902	+		novel	NM_153128	Klhl12	exonic	637
chr6:115383679-115473311+	3.10086	9.05835	6.92493	0.0118797	0.450865	up	0	0	2	3	0	0	0	0	0	0	8.92316	8.92316	9.89315	10.2004	8.92316	8.92316	8.92316	8.92316	8.92316	8.92316	chr6	115383678	115473311	+		novel	NM_001127330	Pparg	exonic	1253
chr13:59512324-59544451-	3.09971	9.12196	6.57017	0.0118797	0.450865	up	0	0	2	1	2	0	0	0	0	0	8.92316	8.92316	9.89315	9.48344	9.89321	8.92316	8.92316	8.92316	8.92316	8.92316	chr13	59512323	59544451	-	13_59645812_59613685_-32127|19.61|18|114	PMID:25714049	NM_023328	Agtpbp1	exonic	1120
chr8:85875017-85901957+	3.09937	9.00802	6.71741	0.0118797	0.450865	up	0	2	1	1	1	0	0	0	0	0	8.92316	9.87826	9.48818	9.48344	9.48822	8.92316	8.92316	8.92316	8.92316	8.92316	chr8	85875016	85901957	+		novel	NM_199446	Phkb	sense overlapping	26941
chr11:96322111-96323445+	3.09924	9.07558	6.89949	0.0118797	0.450865	up	0	1	3	1	0	0	0	0	0	0	8.92316	9.47834	10.209	9.48344	8.92316	8.92316	8.92316	8.92316	8.92316	8.92316	chr11	96322110	96323445	+	mmu_circ_0003577	circBase	NM_001079869	Hoxb3	sense overlapping	1335
chr3:10328345-10335351-	3.09733	9.04189	6.91444	0.0118797	0.450865	up	0	2	2	1	0	0	0	0	0	0	8.92316	9.87826	9.89315	9.48344	8.92316	8.92316	8.92316	8.92316	8.92316	8.92316	chr3	10328344	10335351	-		novel	NM_018864	Impa1	sense overlapping	7007
chr14:34319882-34336576+	3.09648	9.11292	6.62861	0.0118797	0.450865	up	0	0	2	3	0	0	0	0	0	0	8.92316	8.92316	9.89315	10.2004	8.92316	8.92316	8.92316	8.92316	8.92316	8.92316	chr14	34319881	34336576	+		novel	NM_008133	Glud1	exonic	833
chr3:133082039-133085025-	3.09635	9.05835	6.91281	0.0118797	0.450865	up	0	1	1	3	0	0	0	0	0	0	8.92316	9.47834	9.48818	10.2004	8.92316	8.92316	8.92316	8.92316	8.92316	8.92316	chr3	133082038	133085025	-	3_132747989_132745003_-2986|19.03|2|2	PMID:25714049	NM_026231	Gstcd	exonic	918
chr9:101148582-101194425-	3.09619	9.0257	6.76381	0.0118797	0.450865	up	0	2	0	2	1	0	0	0	0	0	8.92316	9.87826	8.92316	9.88598	9.48822	8.92316	8.92316	8.92316	8.92316	8.92316	chr9	101148581	101194425	-	mmu_circ_0015168	circBase	NM_172144	Ppp2r3a	exonic	793
chr14:63151150-63164629-	3.09617	9.02377	6.72144	0.0118797	0.450865	up	0	3	0	0	2	0	0	0	0	0	8.92316	10.191	8.92316	8.92316	9.89321	8.92316	8.92316	8.92316	8.92316	8.92316	chr14	63151149	63164629	-		novel	NM_010191	Fdft1	exonic	933
chr5:137150696-137150875-	3.09585	9.09092	6.80164	0.0118797	0.450865	up	0	1	2	2	0	0	0	0	0	0	8.92316	9.47834	9.89315	9.88598	8.92316	8.92316	8.92316	8.92316	8.92316	8.92316	chr5	137150695	137150875	-		novel			intergenic	180
chr1:84776317-84786196-	3.09375	9.12399	6.53565	0.0118797	0.450865	up	0	1	2	2	0	0	0	0	0	0	8.92316	9.47834	9.89315	9.88598	8.92316	8.92316	8.92316	8.92316	8.92316	8.92316	chr1	84776316	84786196	-	1_84782771_84772892_-9879|20.03|10|14	PMID:25714049	NM_133975	Trip12	exonic	423
chr13:106812208-106848336-	3.09252	9.14799	6.28858	0.0121521	0.450865	up	0	1	0	2	2	0	0	0	0	0	8.92316	9.47834	8.92316	9.88598	9.89321	8.92316	8.92316	8.92316	8.92316	8.92316	chr13	106812207	106848336	-	13_107638416_107602288_-36128|20.21|18|114	PMID:25714049	NM_029665	Ipo11	exonic	513
chr5:137150773-137151114-	3.09216	9.2297	5.80213	0.0160071	0.450865	up	0	0	3	2	0	0	0	0	0	0	8.92316	8.92316	10.209	9.88598	8.92316	8.92316	8.92316	8.92316	8.92316	8.92316	chr5	137150772	137151114	-		novel			intergenic	342
chr16:11230510-11239096-	3.09168	9.16507	6.18432	0.012889	0.450865	up	0	1	0	2	2	0	0	0	0	0	8.92316	9.47834	8.92316	9.88598	9.89321	8.92316	8.92316	8.92316	8.92316	8.92316	chr16	11230509	11239096	-	16_11239189_11230603_-8586|12.02|11|13	PMID:25714049	NM_001130008	Gspt1	exonic	814
chr3:30907048-30942652-	3.09084	9.07186	6.87377	0.0118797	0.450865	up	0	3	1	1	0	0	0	0	0	0	8.92316	10.191	9.48818	9.48344	8.92316	8.92316	8.92316	8.92316	8.92316	8.92316	chr3	30907047	30942652	-		novel	NM_153421	Phc3	sense overlapping	35605
chr5:137150922-137151083-	3.08906	9.30234	5.52258	0.0187729	0.450865	up	0	0	3	2	0	0	0	0	0	0	8.92316	8.92316	10.209	9.88598	8.92316	8.92316	8.92316	8.92316	8.92316	8.92316	chr5	137150921	137151083	-		novel			intergenic	162
chr3:104080137-104089668-	3.08796	9.12088	6.54562	0.0118797	0.450865	up	0	3	0	1	1	0	0	0	0	0	8.92316	10.191	8.92316	9.48344	9.48822	8.92316	8.92316	8.92316	8.92316	8.92316	chr3	104080136	104089668	-		novel	NM_133853	Magi3	exonic	468
chr11:50304326-50308929-	3.08753	9.26187	5.6643	0.017314	0.450865	up	0	1	0	2	2	0	0	0	0	0	8.92316	9.47834	8.92316	9.88598	9.89321	8.92316	8.92316	8.92316	8.92316	8.92316	chr11	50304325	50308929	-	11_50122431_50117828_-4603|16.88|19|45	PMID:25714049	NM_007597	Canx	exonic	607
chr12:102807900-102812843-	3.08436	9.44812	5.19155	0.0226973	0.450865	up	0	0	0	2	3	0	0	0	0	0	8.92316	8.92316	8.92316	9.88598	10.2091	8.92316	8.92316	8.92316	8.92316	8.92316	chr12	102807899	102812843	-	12_104051053_104046110_-4943|18.78|13|34	PMID:25714049	NM_172806	Btbd7	exonic	446
chr14:78947141-78984302+	3.08374	9.23109	5.77303	0.0162743	0.450865	up	0	3	1	1	0	0	0	0	0	0	8.92316	10.191	9.48818	9.48344	8.92316	8.92316	8.92316	8.92316	8.92316	8.92316	chr14	78947140	78984302	+	14_79384109_79346948_-37161|11.29|4|4	PMID:25714049	NM_027906	Vwa8	exonic	620
chr17:86098512-86120746-	3.07876	9.40944	5.25379	0.0218994	0.450865	up	0	3	0	1	1	0	0	0	0	0	8.92316	10.191	8.92316	9.48344	9.48822	8.92316	8.92316	8.92316	8.92316	8.92316	chr17	86098511	86120746	-	mmu_circ_0000829	circBase	NM_030133	Srbd1	exonic	802
chr5:106635610-106638635-	3.0767	9.37952	5.30915	0.021214	0.450865	up	0	4	0	1	0	0	0	0	0	0	8.92316	10.4479	8.92316	9.48344	8.92316	8.92316	8.92316	8.92316	8.92316	8.92316	chr5	106635609	106638635	-	5_107067654_107064629_-3025|20.21|13|17	PMID:25714049	NM_026856	Zfp644	exonic	2933
chr2:120375419-120385891-	3.07135	9.00667	6.69534	0.0118797	0.450865	up	1	0	4	0	0	0	0	0	0	0	9.40746	8.92316	10.468	8.92316	8.92316	8.92316	8.92316	8.92316	8.92316	8.92316	chr2	120375418	120385891	-	2_120211627_120201155_-10472|16.00|2|2	PMID:25714049	NM_173734	Tmem87a	exonic	558
chr12:101932968-101948439-	3.06601	9.18166	5.98566	0.014423	0.450865	up	1	0	2	1	1	0	0	0	0	0	9.40746	8.92316	9.89315	9.48344	9.48822	8.92316	8.92316	8.92316	8.92316	8.92316	chr12	101932967	101948439	-	mmu_circ_0003663	circBase	NM_029705	Atxn3	exonic	848
chr11:79549408-79553997+	3.0656	9.07339	6.8046	0.0118797	0.450865	up	1	0	0	2	2	0	0	0	0	0	9.40746	8.92316	8.92316	9.88598	9.89321	8.92316	8.92316	8.92316	8.92316	8.92316	chr11	79549407	79553997	+	11_79367499_79362910_-4589|16.24|11|16	PMID:25714049	NM_010897	Nf1	exonic	370
chr6:115632897-115644642-	3.06418	9.18055	5.98975	0.0143895	0.450865	up	1	1	0	0	3	0	0	0	0	0	9.40746	9.47834	8.92316	8.92316	10.2091	8.92316	8.92316	8.92316	8.92316	8.92316	chr6	115632896	115644642	-	6_115594660_115582915_-11745|18.62|8|17	PMID:25714049	NM_029780	Raf1	exonic	706
chr2:154515817-154524099+	3.06234	9.19659	5.87398	0.0153665	0.450865	up	1	1	0	1	2	0	0	0	0	0	9.40746	9.47834	8.92316	9.48344	9.89321	8.92316	8.92316	8.92316	8.92316	8.92316	chr2	154515816	154524099	+		novel	NM_009823	Cbfa2t2	exonic	718
chr18:61157343-61157761-	3.06218	9.24127	5.66453	0.0173117	0.450865	up	1	0	1	3	0	0	0	0	0	0	9.40746	8.92316	9.48818	10.2004	8.92316	8.92316	8.92316	8.92316	8.92316	8.92316	chr18	61157342	61157761	-	18_61317415_61316997_-418|18.11|16|51	PMID:25714049	NM_134134	Hmgxb3	exonic	323
chr6:29878529-29883729+	3.05888	9.0061	6.68453	0.0118797	0.450865	up	1	2	0	1	1	0	0	0	0	0	9.40746	9.87826	8.92316	9.48344	9.48822	8.92316	8.92316	8.92316	8.92316	8.92316	chr6	29878528	29883729	+	6_29833729_29828529_-5200|15.87|10|18	PMID:25714049	NM_021414	Ahcyl2	exonic	305
chr12:87336032-87346801-	3.05688	9.15388	6.15689	0.0130904	0.450865	up	1	3	0	0	1	0	0	0	0	0	9.40746	10.191	8.92316	8.92316	9.48822	8.92316	8.92316	8.92316	8.92316	8.92316	chr12	87336031	87346801	-	12_88687751_88676982_-10769|19.49|4|6	PMID:25714049	NM_011479	Sptlc2	exonic	547
chr9:65730976-65795495-	3.05443	9.0745	6.7741	0.0118797	0.450865	up	1	3	0	1	0	0	0	0	0	0	9.40746	10.191	8.92316	9.48344	8.92316	8.92316	8.92316	8.92316	8.92316	8.92316	chr9	65730975	65795495	-	mmu_circ_0001796	circBase	NM_172536	Zfp609	exonic	1100
chr4:133322172-133323974-	3.05408	9.03937	6.80139	0.0118797	0.450865	up	1	3	0	1	0	0	0	0	0	0	9.40746	10.191	8.92316	9.48344	8.92316	8.92316	8.92316	8.92316	8.92316	8.92316	chr4	133322171	133323974	-	4_132879889_132878087_-1802|21.80|2|3	PMID:25714049	NM_199306	Wdtc1	exonic	231
chr4:43087903-43101874+	3.04263	9.4993	5.01002	0.0252014	0.450865	up	2	0	1	1	1	0	0	0	0	0	9.7694	8.92316	9.48818	9.48344	9.48822	8.92316	8.92316	8.92316	8.92316	8.92316	chr4	43087902	43101874	+	4_43114746_43100775_-13971|19.26|22|126	PMID:25714049	NM_021468	Unc13b	exonic	446
chr11:87184884-87186515+	3.03703	9.23016	5.65049	0.0174508	0.450865	up	2	0	1	1	1	0	0	0	0	0	9.7694	8.92316	9.48818	9.48344	9.48822	8.92316	8.92316	8.92316	8.92316	8.92316	chr11	87184883	87186515	+	11_87000017_86998386_-1631|11.36|4|4	PMID:25714049	NM_197987	Trim37	exonic	356
chr17:24992270-25003405-	3.0338	9.18097	5.90278	0.0151173	0.450865	up	2	0	0	2	1	0	0	0	0	0	9.7694	8.92316	8.92316	9.88598	9.48822	8.92316	8.92316	8.92316	8.92316	8.92316	chr17	24992269	25003405	-	mmu_circ_0000731	circBase	NM_020608	Cramp1l	exonic	481
chr4:129838978-129842762+	3.03069	9.02284	6.54648	0.0118797	0.450865	up	2	0	0	0	3	0	0	0	0	0	9.7694	8.92316	8.92316	8.92316	10.2091	8.92316	8.92316	8.92316	8.92316	8.92316	chr4	129838977	129842762	+		novel	NM_008974	Ptp4a2	exonic	794
chr3:116694430-116694634-	3.02911	9.03887	6.73655	0.0118797	0.450865	up	2	0	2	1	0	0	0	0	0	0	9.7694	8.92316	9.89315	9.48344	8.92316	8.92316	8.92316	8.92316	8.92316	8.92316	chr3	116694429	116694634	-		novel	NM_144902	Slc35a3	exonic	205
chr15:58557850-58602306+	3.02807	9.02053	6.48145	0.0118797	0.450865	up	2	0	2	1	0	0	0	0	0	0	9.7694	8.92316	9.89315	9.48344	8.92316	8.92316	8.92316	8.92316	8.92316	8.92316	chr15	58557849	58602306	+		novel	ENSMUST00000161028	Fer1l6	exonic	2436
chr16:96372830-96397964+	3.02684	9.04008	6.73259	0.0118797	0.450865	up	2	0	1	2	0	0	0	0	0	0	9.7694	8.92316	9.48818	9.88598	8.92316	8.92316	8.92316	8.92316	8.92316	8.92316	chr16	96372829	96397964	+		novel	NM_028078	Igsf5	exonic	659
chr1:140362949-140450304+	3.02662	9.03858	6.72969	0.0118797	0.450865	up	2	1	0	0	2	0	0	0	0	0	9.7694	9.47834	8.92316	8.92316	9.89321	8.92316	8.92316	8.92316	8.92316	8.92316	chr1	140362948	140450304	+	mmu_circ_0000085	circBase	NM_001081027	Kcnt2	exonic	1019
chr9:58623687-58643802+	3.02562	9.02043	6.47298	0.0118797	0.450865	up	2	0	1	2	0	0	0	0	0	0	9.7694	8.92316	9.48818	9.88598	8.92316	8.92316	8.92316	8.92316	8.92316	8.92316	chr9	58623686	58643802	+	9_58491609_58471494_-20115|15.07|3|4	PMID:25714049	NM_009145	Nptn	exonic	672
chr10:11178734-11185462+	3.01826	9.05646	6.69635	0.0118797	0.450865	up	2	3	0	0	0	0	0	0	0	0	9.7694	10.191	8.92316	8.92316	8.92316	8.92316	8.92316	8.92316	8.92316	8.92316	chr10	11178733	11185462	+	mmu_circ_0000143	circBase	NM_172937	Shprh	exonic	433
chr7:97883472-97894013+	3.01434	9.34958	5.21336	0.0224144	0.450865	up	3	1	0	0	1	0	0	0	0	0	10.0585	9.47834	8.92316	8.92316	9.48822	8.92316	8.92316	8.92316	8.92316	8.92316	chr7	97883471	97894013	+	mmu_circ_0001599	circBase	NM_011035	Pak1	exonic	405
chr11:21711462-21724636+	2.99716	9.13548	6.15003	0.0131413	0.450865	up	3	1	0	1	0	0	0	0	0	0	10.0585	9.47834	8.92316	9.48344	8.92316	8.92316	8.92316	8.92316	8.92316	8.92316	chr11	21711461	21724636	+	11_21624639_21611465_-13174|16.83|10|15	PMID:25714049	NM_145425	Wdpcp	exonic	923
chr9:116129816-116131713-	2.99152	9.3501	5.15446	0.0231871	0.450865	up	4	0	0	1	0	0	0	0	0	0	10.2992	8.92316	8.92316	9.48344	8.92316	8.92316	8.92316	8.92316	8.92316	8.92316	chr9	116129815	116131713	-	mmu_circ_0001853	circBase	NM_009371	Tgfbr2	exonic	360
chr16:84978064-85043743-	2.97824	9.01885	6.32229	0.0119233	0.450865	up	3	2	0	0	0	0	0	0	0	0	10.0585	9.87826	8.92316	8.92316	8.92316	8.92316	8.92316	8.92316	8.92316	8.92316	chr16	84978063	85043743	-		novel	NM_001198823	App	exonic	1044
chr18:73657195-73658898-	2.97393	9.40338	5.00013	0.0253459	0.450865	up	5	0	0	0	0	0	0	0	0	0	10.5055	8.92316	8.92316	8.92316	8.92316	8.92316	8.92316	8.92316	8.92316	8.92316	chr18	73657194	73658898	-	18_73818552_73816849_-1703|23.29|2|4	PMID:25714049	NM_008540	Smad4	exonic	288
chr10:125294595-125302081-	2.96693	9.1168	6.23433	0.01253	0.450865	up	4	0	0	0	1	0	0	0	0	0	10.2992	8.92316	8.92316	8.92316	9.48822	8.92316	8.92316	8.92316	8.92316	8.92316	chr10	125294594	125302081	-	10_124739137_124731651_-7486|20.58|15|51	PMID:25714049	NM_011391	Slc16a7	exonic	456
chr6:85256343-85269963-	2.96661	9.33359	5.12664	0.0235617	0.450865	up	5	0	0	0	0	0	0	0	0	0	10.5055	8.92316	8.92316	8.92316	8.92316	8.92316	8.92316	8.92316	8.92316	8.92316	chr6	85256342	85269963	-	6_85219957_85206337_-13620|20.63|13|50	PMID:25714049	NM_178639	Sfxn5	exonic	268
chrX:13123168-13124663+	2.94451	9.00092	6.57362	0.0118797	0.450865	up	4	0	0	0	1	0	0	0	0	0	10.2992	8.92316	8.92316	8.92316	9.48822	8.92316	8.92316	8.92316	8.92316	8.92316	chrX	13123167	13124663	+		novel	NM_009481	Usp9x	exonic	439
chr8:85875634-85922242+	2.93521	9.28334	5.89251	0.0152057	0.450865	up	1	4	3	5	0	0	0	1	0	0	9.40746	10.4479	10.209	10.6771	8.92316	8.92316	8.92316	9.53126	8.92316	8.92316	chr8	85875633	85922242	+	mmu_circ_0001708	circBase	NM_199446	Phkb	exonic	634
chr7:73463636-73519708-	2.90956	9.04135	6.43762	0.0118797	0.450865	up	5	0	0	0	0	0	0	0	0	0	10.5055	8.92316	8.92316	8.92316	8.92316	8.92316	8.92316	8.92316	8.92316	8.92316	chr7	73463635	73519708	-	7_80664594_80608522_-56072|16.44|5|5	PMID:25714049	NM_001081345	Chd2	exonic	3533
chr15:97820519-97826487-	2.89994	8.999	6.50039	0.0118797	0.450865	up	5	0	0	0	0	0	0	0	0	0	10.5055	8.92316	8.92316	8.92316	8.92316	8.92316	8.92316	8.92316	8.92316	8.92316	chr15	97820518	97826487	-		novel	ENSMUST00000079838	Hdac7	intronic	5969
chr1:92963659-92973399+	2.83012	8.9919	6.48126	0.0244421	0.450865	up	0	0	4	0	0	0	0	0	0	0	8.92316	8.92316	10.468	8.92316	8.92316	8.92316	8.92316	8.92316	8.92316	8.92316	chr1	92963658	92973399	+		novel	NM_001104529	Gpr35	sense overlapping	9741
chr8:25003258-25006274-	2.83012	8.9919	6.48126	0.0244421	0.450865	up	0	0	4	0	0	0	0	0	0	0	8.92316	8.92316	10.468	8.92316	8.92316	8.92316	8.92316	8.92316	8.92316	8.92316	chr8	25003257	25006274	-		novel	NM_007404	Adam9	exonic	236
chr14:103082836-103083103-	2.83012	8.9919	6.48126	0.0244421	0.450865	up	0	0	4	0	0	0	0	0	0	0	8.92316	8.92316	10.468	8.92316	8.92316	8.92316	8.92316	8.92316	8.92316	8.92316	chr14	103082835	103083103	-		novel	NM_015822	Fbxl3	sense overlapping	268
chr14:24159576-24159816-	2.83012	8.9919	6.48126	0.0244421	0.450865	up	0	0	4	0	0	0	0	0	0	0	8.92316	8.92316	10.468	8.92316	8.92316	8.92316	8.92316	8.92316	8.92316	8.92316	chr14	24159575	24159816	-		novel	ENSMUST00000042009	Dlg5	intronic	241
chr8:3507149-3511810+	2.83012	8.9919	6.48126	0.0244421	0.450865	up	0	0	4	0	0	0	0	0	0	0	8.92316	8.92316	10.468	8.92316	8.92316	8.92316	8.92316	8.92316	8.92316	8.92316	chr8	3507148	3511810	+	8_3511810_3507149_-4661|17.07|2|2	PMID:25714049	NM_053177	Mcoln1	exonic	1122
chr1:125587365-125591129+	2.82842	9.02783	6.11331	0.0244421	0.450865	up	0	0	1	0	3	0	0	0	0	0	8.92316	8.92316	9.48818	8.92316	10.2091	8.92316	8.92316	8.92316	8.92316	8.92316	chr1	125587364	125591129	+	1_127487706_127483942_-3764|17.97|2|2	PMID:25714049	NM_028787	Slc35f5	exonic	343
chr9:104196023-104200538-	2.82734	8.9918	6.47809	0.0244421	0.450865	up	0	0	1	1	2	0	0	0	0	0	8.92316	8.92316	9.48818	9.48344	9.89321	8.92316	8.92316	8.92316	8.92316	8.92316	chr9	104196022	104200538	-		novel	NM_001163026	Dnajc13	exonic	495
chr12:116359356-116362917+	2.82731	8.99179	6.47806	0.0244421	0.450865	up	0	0	2	1	1	0	0	0	0	0	8.92316	8.92316	9.89315	9.48344	9.48822	8.92316	8.92316	8.92316	8.92316	8.92316	chr12	116359355	116362917	+		novel	ENSMUST00000100986	Esyt2	intronic	3562
chr5:21029776-21031725-	2.82729	8.99179	6.47804	0.0244421	0.450865	up	0	0	3	1	0	0	0	0	0	0	8.92316	8.92316	10.209	9.48344	8.92316	8.92316	8.92316	8.92316	8.92316	8.92316	chr5	21029775	21031725	-	5_20537543_20535594_-1949|15.45|2|2	PMID:25714049	ENSMUST00000140057	Ptpn12	intronic	1950
chr1:93421084-93427636-	2.82729	8.99179	6.47804	0.0244421	0.450865	up	0	0	3	1	0	0	0	0	0	0	8.92316	8.92316	10.209	9.48344	8.92316	8.92316	8.92316	8.92316	8.92316	8.92316	chr1	93421083	93427636	-		novel	NM_133808	Hdlbp	exonic	657
chr6:140586309-140591764+	2.82729	8.99179	6.47804	0.0244421	0.450865	up	0	0	3	1	0	0	0	0	0	0	8.92316	8.92316	10.209	9.48344	8.92316	8.92316	8.92316	8.92316	8.92316	8.92316	chr6	140586308	140591764	+		novel	NM_144920	Plekha5	exonic	580
chr15:33519611-33519823+	2.82729	8.99179	6.47804	0.0244421	0.450865	up	0	0	3	1	0	0	0	0	0	0	8.92316	8.92316	10.209	9.48344	8.92316	8.92316	8.92316	8.92316	8.92316	8.92316	chr15	33519610	33519823	+		novel	ENSMUST00000042167	Cpq	intronic	213
chr3:117686697-117687569+	2.82729	8.99179	6.47804	0.0244421	0.450865	up	0	0	3	1	0	0	0	0	0	0	8.92316	8.92316	10.209	9.48344	8.92316	8.92316	8.92316	8.92316	8.92316	8.92316	chr3	117686696	117687569	+		novel	NM_029425	Lppr5	sense overlapping	873
chr18:65622984-65638931+	2.82729	8.99179	6.47804	0.0244421	0.450865	up	0	0	3	1	0	0	0	0	0	0	8.92316	8.92316	10.209	9.48344	8.92316	8.92316	8.92316	8.92316	8.92316	8.92316	chr18	65622983	65638931	+		novel	uc008ffe.2	Zfp532	exonic	2533
chr17:71415035-71444048-	2.82729	8.99179	6.47804	0.0244421	0.450865	up	0	0	3	1	0	0	0	0	0	0	8.92316	8.92316	10.209	9.48344	8.92316	8.92316	8.92316	8.92316	8.92316	8.92316	chr17	71415034	71444048	-		novel	NM_028887	Smchd1	exonic	1585
chr5:137151570-137152054-	2.82729	8.99179	6.47804	0.0244421	0.450865	up	0	0	3	1	0	0	0	0	0	0	8.92316	8.92316	10.209	9.48344	8.92316	8.92316	8.92316	8.92316	8.92316	8.92316	chr5	137151569	137152054	-		novel			intergenic	485
chr2:126830129-126846245-	2.82729	8.99179	6.47804	0.0244421	0.450865	up	0	0	3	1	0	0	0	0	0	0	8.92316	8.92316	10.209	9.48344	8.92316	8.92316	8.92316	8.92316	8.92316	8.92316	chr2	126830128	126846245	-		novel	NM_021450	Trpm7	exonic	1110
chr11:87149296-87167516+	2.82729	8.99179	6.47804	0.0244421	0.450865	up	0	0	3	1	0	0	0	0	0	0	8.92316	8.92316	10.209	9.48344	8.92316	8.92316	8.92316	8.92316	8.92316	8.92316	chr11	87149295	87167516	+		novel	NM_197987	Trim37	exonic	403
chr5:147521830-147531307+	2.82709	9.00795	6.08047	0.0244421	0.450865	up	0	0	2	1	1	0	0	0	0	0	8.92316	8.92316	9.89315	9.48344	9.48822	8.92316	8.92316	8.92316	8.92316	8.92316	chr5	147521829	147531307	+	5_148342883_148333406_-9477|23.88|7|9	PMID:25714049	NM_028291	Pan3	exonic	801
chr18:31771670-31776077+	2.82706	9.0085	6.065	0.0244421	0.450865	up	0	0	3	1	0	0	0	0	0	0	8.92316	8.92316	10.209	9.48344	8.92316	8.92316	8.92316	8.92316	8.92316	8.92316	chr18	31771669	31776077	+		novel	NM_153515	Ammecr1l	exonic	762
chr19:42576026-42583543+	2.82656	9.04542	6.14366	0.0244421	0.450865	up	0	0	1	0	3	0	0	0	0	0	8.92316	8.92316	9.48818	8.92316	10.2091	8.92316	8.92316	8.92316	8.92316	8.92316	chr19	42576025	42583543	+	19_42658033_42650516_-7517|18.25|2|2	PMID:25714049	NM_177464	R3hcc1l	exonic	484
chr19:57731552-57797503+	2.82569	9.02739	6.10166	0.0244421	0.450865	up	0	0	2	1	1	0	0	0	0	0	8.92316	8.92316	9.89315	9.48344	9.48822	8.92316	8.92316	8.92316	8.92316	8.92316	chr19	57731551	57797503	+	mmu_circ_0000966	circBase	NM_181415	Atrnl1	exonic	620
chr1:5089009-5124469+	2.82473	9.06289	6.10387	0.0244421	0.450865	up	0	0	1	0	3	0	0	0	0	0	8.92316	8.92316	9.48818	8.92316	10.2091	8.92316	8.92316	8.92316	8.92316	8.92316	chr1	5089008	5124469	+	1_5114550_5079090_-35460|20.22|7|8	PMID:25714049	NM_133826	Atp6v1h	exonic	757
chr5:21226244-21246070+	2.82445	8.99168	6.4748	0.0244421	0.450865	up	0	0	2	2	0	0	0	0	0	0	8.92316	8.92316	9.89315	9.88598	8.92316	8.92316	8.92316	8.92316	8.92316	8.92316	chr5	21226243	21246070	+		novel	NM_175437	Gsap	sense overlapping	19827
chr6:70770994-70777411-	2.82445	8.99168	6.4748	0.0244421	0.450865	up	0	0	2	2	0	0	0	0	0	0	8.92316	8.92316	9.89315	9.88598	8.92316	8.92316	8.92316	8.92316	8.92316	8.92316	chr6	70770993	70777411	-		novel	NM_009075	Rpia	exonic	436
chr6:18227927-18273736+	2.82445	8.99168	6.4748	0.0244421	0.450865	up	0	0	2	2	0	0	0	0	0	0	8.92316	8.92316	9.89315	9.88598	8.92316	8.92316	8.92316	8.92316	8.92316	8.92316	chr6	18227926	18273736	+		novel	NM_021050	Cftr	exonic	1526
chr14:52096556-52096723-	2.82445	8.99168	6.4748	0.0244421	0.450865	up	0	0	2	2	0	0	0	0	0	0	8.92316	8.92316	9.89315	9.88598	8.92316	8.92316	8.92316	8.92316	8.92316	8.92316	chr14	52096555	52096723	-		novel	NM_001170982	Hnrnpc	intronic	168
chr13:96665810-96666708-	2.82445	8.99168	6.4748	0.0244421	0.450865	up	0	0	2	2	0	0	0	0	0	0	8.92316	8.92316	9.89315	9.88598	8.92316	8.92316	8.92316	8.92316	8.92316	8.92316	chr13	96665809	96666708	-		novel	NM_008255	Hmgcr	exonic	388
chr9:90102300-90110172-	2.82445	8.99168	6.4748	0.0244421	0.450865	up	0	0	2	2	0	0	0	0	0	0	8.92316	8.92316	9.89315	9.88598	8.92316	8.92316	8.92316	8.92316	8.92316	8.92316	chr9	90102299	90110172	-		novel	NM_024431	Morf4l1	exonic	202
chr6:92887341-92912912-	2.82445	8.99168	6.4748	0.0244421	0.450865	up	0	0	2	2	0	0	0	0	0	0	8.92316	8.92316	9.89315	9.88598	8.92316	8.92316	8.92316	8.92316	8.92316	8.92316	chr6	92887340	92912912	-		novel	ENSMUST00000113438	Adamts9	exonic	1710
chr5:50009336-50025778-	2.82445	8.99168	6.4748	0.0244421	0.450865	up	0	0	2	2	0	0	0	0	0	0	8.92316	8.92316	9.89315	9.88598	8.92316	8.92316	8.92316	8.92316	8.92316	8.92316	chr5	50009335	50025778	-	5_50417017_50400575_-16442|22.87|2|2	PMID:25714049	NM_133911	Adgra2	exonic	449
chr3:32554155-32564305+	2.82445	8.99168	6.4748	0.0244421	0.450865	up	0	0	2	2	0	0	0	0	0	0	8.92316	8.92316	9.89315	9.88598	8.92316	8.92316	8.92316	8.92316	8.92316	8.92316	chr3	32554154	32564305	+	3_32463227_32453077_-10150|19.41|7|9	PMID:25714049	NM_024200	Mfn1	exonic	909
chr9:50857836-50873707+	2.82445	8.99168	6.4748	0.0244421	0.450865	up	0	0	2	2	0	0	0	0	0	0	8.92316	8.92316	9.89315	9.88598	8.92316	8.92316	8.92316	8.92316	8.92316	8.92316	chr9	50857835	50873707	+		novel	NM_028614	Ppp2r1b	exonic	1285
chr5:137151359-137151790-	2.82431	8.99168	6.47465	0.0244421	0.450865	up	0	1	0	0	3	0	0	0	0	0	8.92316	9.47834	8.92316	8.92316	10.2091	8.92316	8.92316	8.92316	8.92316	8.92316	chr5	137151358	137151790	-		novel			intergenic	432
chr8:77310731-77358634-	2.82429	9.00824	6.06622	0.0244421	0.450865	up	0	0	0	2	2	0	0	0	0	0	8.92316	8.92316	8.92316	9.88598	9.89321	8.92316	8.92316	8.92316	8.92316	8.92316	chr8	77310730	77358634	-	8_79882533_79834630_-47903|17.71|16|50	PMID:25714049	NM_030113	Arhgap10	exonic	564
chr5:146271595-146296431+	2.82424	9.0083	6.06462	0.0244421	0.450865	up	0	0	2	2	0	0	0	0	0	0	8.92316	8.92316	9.89315	9.88598	8.92316	8.92316	8.92316	8.92316	8.92316	8.92316	chr5	146271594	146296431	+		novel	NM_153599	Cdk8	exonic	618
chr15:27871161-27881429-	2.82424	9.00831	6.06408	0.0244421	0.450865	up	0	0	2	2	0	0	0	0	0	0	8.92316	8.92316	9.89315	9.88598	8.92316	8.92316	8.92316	8.92316	8.92316	8.92316	chr15	27871160	27881429	-	mmu_circ_0005569	circBase	NM_001081302	Trio	exonic	315
chr3:142820537-142853714-	2.82421	9.00971	6.02486	0.0244421	0.450865	up	0	0	2	2	0	0	0	0	0	0	8.92316	8.92316	9.89315	9.88598	8.92316	8.92316	8.92316	8.92316	8.92316	8.92316	chr3	142820536	142853714	-	3_142516678_142483501_-33177|18.20|9|12	PMID:25714049	NM_178654	Pkn2	exonic	1230
chr3:84515633-84527798-	2.82421	9.0099	6.01964	0.0244421	0.450865	up	0	0	2	2	0	0	0	0	0	0	8.92316	8.92316	9.89315	9.88598	8.92316	8.92316	8.92316	8.92316	8.92316	8.92316	chr3	84515632	84527798	-		novel	NM_001081093	Arfip1	exonic	493
chr2:70745934-70750524-	2.82338	9.07528	6.04453	0.0244421	0.450865	up	0	0	1	0	3	0	0	0	0	0	8.92316	8.92316	9.48818	8.92316	10.2091	8.92316	8.92316	8.92316	8.92316	8.92316	chr2	70745933	70750524	-	mmu_circ_0001030	circBase	NM_172664	Tlk1	exonic	294
chr2:164438276-164438519-	2.8232	9.02475	6.05869	0.0244421	0.450865	up	0	0	2	2	0	0	0	0	0	0	8.92316	8.92316	9.89315	9.88598	8.92316	8.92316	8.92316	8.92316	8.92316	8.92316	chr2	164438275	164438519	-		novel	ENSMUST00000017153	Sdc4	intronic	244
chr14:8136869-8141544+	2.82301	9.07854	6.02989	0.0244421	0.450865	up	0	0	0	0	4	0	0	0	0	0	8.92316	8.92316	8.92316	8.92316	10.468	8.92316	8.92316	8.92316	8.92316	8.92316	chr14	8136868	8141544	+	14_8974058_8969383_-4675|16.56|4|6	PMID:25714049	NM_145458	Pxk	exonic	434
chr4:116691776-116693847+	2.82285	9.02621	6.07961	0.0244421	0.450865	up	0	1	3	0	0	0	0	0	0	0	8.92316	9.47834	10.209	8.92316	8.92316	8.92316	8.92316	8.92316	8.92316	8.92316	chr4	116691775	116693847	+		novel	NM_011034	Prdx1	exonic	408
chr17:28805929-28814717+	2.82278	9.0274	6.09502	0.0244421	0.450865	up	0	1	1	0	2	0	0	0	0	0	8.92316	9.47834	9.48818	8.92316	9.89321	8.92316	8.92316	8.92316	8.92316	8.92316	chr17	28805928	28814717	+		novel	NM_001081315	Brpf3	exonic	1760
chr5:137151359-137151561-	2.8226	9.05879	6.10533	0.0244421	0.450865	up	0	0	2	1	1	0	0	0	0	0	8.92316	8.92316	9.89315	9.48344	9.48822	8.92316	8.92316	8.92316	8.92316	8.92316	chr5	137151358	137151561	-		novel			intergenic	203
chr2:166939635-166944608+	2.82249	9.05961	6.10452	0.0244421	0.450865	up	0	0	3	1	0	0	0	0	0	0	8.92316	8.92316	10.209	9.48344	8.92316	8.92316	8.92316	8.92316	8.92316	8.92316	chr2	166939634	166944608	+	2_166770108_166765135_-4973|19.77|6|11	PMID:25714049	NM_023565	Cse1l	exonic	1005
chr5:89084642-89135820+	2.82236	9.06109	6.10213	0.0244421	0.450865	up	0	0	2	1	1	0	0	0	0	0	8.92316	8.92316	9.89315	9.48344	9.48822	8.92316	8.92316	8.92316	8.92316	8.92316	chr5	89084641	89135820	+	5_89564845_89513667_-51178|16.58|5|9	PMID:25714049	NM_018760	Slc4a4	exonic	767
chr18:5705043-5705243+	2.82176	9.04006	6.15306	0.0244421	0.450865	up	0	0	1	2	1	0	0	0	0	0	8.92316	8.92316	9.48818	9.88598	9.48822	8.92316	8.92316	8.92316	8.92316	8.92316	chr18	5705042	5705243	+	mmu_circ_0007400	circBase	NM_011546	Zeb1	exonic	201
chr16:21434687-21435821+	2.82167	9.04108	6.15062	0.0244421	0.450865	up	0	0	1	2	1	0	0	0	0	0	8.92316	8.92316	9.48818	9.88598	9.48822	8.92316	8.92316	8.92316	8.92316	8.92316	chr16	21434686	21435821	+	16_21435894_21434760_-1134|21.61|13|32	PMID:25714049	NM_001285893	Vps8	exonic	446
chr5:137168923-137172578+	2.82161	8.99157	6.47156	0.0244421	0.450865	up	0	0	1	3	0	0	0	0	0	0	8.92316	8.92316	9.48818	10.2004	8.92316	8.92316	8.92316	8.92316	8.92316	8.92316	chr5	137168922	137172578	+		novel			intergenic	3656
chr10:100466021-100478022-	2.82161	8.99157	6.47156	0.0244421	0.450865	up	0	0	1	3	0	0	0	0	0	0	8.92316	8.92316	9.48818	10.2004	8.92316	8.92316	8.92316	8.92316	8.92316	8.92316	chr10	100466020	100478022	-		novel	NM_001033332	Tmtc3	exonic	1079
chr10:62408615-62411626-	2.82161	8.99157	6.47156	0.0244421	0.450865	up	0	0	1	3	0	0	0	0	0	0	8.92316	8.92316	9.48818	10.2004	8.92316	8.92316	8.92316	8.92316	8.92316	8.92316	chr10	62408614	62411626	-		novel	NM_145419	Hkdc1	exonic	316
chrM:5326-5732+	2.82161	8.99157	6.47156	0.0244421	0.450865	up	0	0	1	3	0	0	0	0	0	0	8.92316	8.92316	9.48818	10.2004	8.92316	8.92316	8.92316	8.92316	8.92316	8.92316	chrM	5325	5732	+		novel	uc009vey.1	DQ539915	sense overlapping	407
chr10:128469820-128470034+	2.82161	8.99157	6.47156	0.0244421	0.450865	up	0	0	1	3	0	0	0	0	0	0	8.92316	8.92316	9.48818	10.2004	8.92316	8.92316	8.92316	8.92316	8.92316	8.92316	chr10	128469819	128470034	+		novel	ENSMUST00000026433	Smarcc2	intronic	215
chr11:45883710-45887550+	2.8214	8.99157	6.47133	0.0244421	0.450865	up	0	1	2	1	0	0	0	0	0	0	8.92316	9.47834	9.89315	9.48344	8.92316	8.92316	8.92316	8.92316	8.92316	8.92316	chr11	45883709	45887550	+		novel	NM_001045520	Clint1	exonic	476
chr6:113047415-113063170+	2.8214	8.99157	6.47133	0.0244421	0.450865	up	0	1	2	1	0	0	0	0	0	0	8.92316	9.47834	9.89315	9.48344	8.92316	8.92316	8.92316	8.92316	8.92316	8.92316	chr6	113047414	113063170	+		novel	NM_008188	Thumpd3	exonic	1046
chr11:97377936-97378711+	2.82072	9.07734	6.02965	0.0244421	0.450865	up	0	0	0	1	3	0	0	0	0	0	8.92316	8.92316	8.92316	9.48344	10.2091	8.92316	8.92316	8.92316	8.92316	8.92316	chr11	97377935	97378711	+	11_97240025_97239250_-775|21.88|5|5	PMID:25714049	NM_138657	Socs7	exonic	300
chr5:32867974-32893453+	2.82052	9.07872	6.02243	0.0244421	0.450865	up	0	0	2	1	1	0	0	0	0	0	8.92316	8.92316	9.89315	9.48344	9.48822	8.92316	8.92316	8.92316	8.92316	8.92316	chr5	32867973	32893453	+	5_33236102_33210623_-25479|13.03|4|4	PMID:25714049	NM_177786	Depdc5	exonic	504
chr10:88892024-88911419+	2.81993	9.05994	6.09766	0.0244421	0.450865	up	0	0	2	2	0	0	0	0	0	0	8.92316	8.92316	9.89315	9.88598	8.92316	8.92316	8.92316	8.92316	8.92316	8.92316	chr10	88892023	88911419	+		novel	NM_145423	Slc5a8	exonic	882
chr11:74784058-74787695+	2.81959	9.03424	6.14234	0.0244421	0.450865	up	0	0	1	3	0	0	0	0	0	0	8.92316	8.92316	9.48818	10.2004	8.92316	8.92316	8.92316	8.92316	8.92316	8.92316	chr11	74784057	74787695	+	mmu_circ_0003349	circBase	NM_026197	Mettl16	exonic	341
chr18:35239383-35244848+	2.81902	9.04088	6.14463	0.0244421	0.450865	up	0	0	1	3	0	0	0	0	0	0	8.92316	8.92316	9.48818	10.2004	8.92316	8.92316	8.92316	8.92316	8.92316	8.92316	chr18	35239382	35244848	+		novel	NM_009818	Ctnna1	exonic	510
chr17:78237742-78248415+	2.81877	8.99146	6.4683	0.0244421	0.450865	up	0	0	0	4	0	0	0	0	0	0	8.92316	8.92316	8.92316	10.4583	8.92316	8.92316	8.92316	8.92316	8.92316	8.92316	chr17	78237741	78248415	+	17_78647755_78637082_-10673|17.36|2|2	PMID:25714049	NM_015800	Crim1	sense overlapping	10674
chr1:87364104-87403846+	2.81873	9.04246	6.13897	0.0244421	0.450865	up	0	1	0	1	2	0	0	0	0	0	8.92316	9.47834	8.92316	9.48344	9.89321	8.92316	8.92316	8.92316	8.92316	8.92316	chr1	87364103	87403846	+	1_89300421_89260679_-39742|21.11|6|7	PMID:25714049	NM_146112	Gigyf2	exonic	674
chr11:61152560-61152773-	2.81839	8.99145	6.46789	0.0244421	0.450865	up	0	2	0	0	2	0	0	0	0	0	8.92316	9.87826	8.92316	8.92316	9.89321	8.92316	8.92316	8.92316	8.92316	8.92316	chr11	61152559	61152773	-		novel	NM_001004143	Usp22	sense overlapping	214
chr3:35809357-35849564+	2.81839	8.99145	6.46789	0.0244421	0.450865	up	0	2	0	0	2	0	0	0	0	0	8.92316	9.87826	8.92316	8.92316	9.89321	8.92316	8.92316	8.92316	8.92316	8.92316	chr3	35809356	35849564	+		novel	NM_029570	Atp11b	exonic	2246
chr2:156096826-156103397-	2.81834	9.07652	6.02693	0.0244421	0.450865	up	0	0	2	2	0	0	0	0	0	0	8.92316	8.92316	9.89315	9.88598	8.92316	8.92316	8.92316	8.92316	8.92316	8.92316	chr2	156096825	156103397	-	2_155929133_155922562_-6571|18.96|6|10	PMID:25714049	ENSMUST00000079312	Cpne1	intronic	6572
chr1:133633762-133647529-	2.81823	9.00677	6.09453	0.0244421	0.450865	up	0	2	0	0	2	0	0	0	0	0	8.92316	9.87826	8.92316	8.92316	9.89321	8.92316	8.92316	8.92316	8.92316	8.92316	chr1	133633761	133647529	-	1_135544106_135530339_-13767|23.85|3|3	PMID:25714049	NM_144530	Zc3h11a	exonic	1110
chr3:63943222-63963051-	2.81821	9.00837	6.04959	0.0244421	0.450865	up	0	2	0	0	2	0	0	0	0	0	8.92316	9.87826	8.92316	8.92316	9.89321	8.92316	8.92316	8.92316	8.92316	8.92316	chr3	63943221	63963051	-	3_63766973_63747144_-19829|18.61|2|2	PMID:25714049	NM_015728	Slc33a1	sense overlapping	19830
chr19:47283021-47314166-	2.81672	9.12224	5.64882	0.0244421	0.450865	up	0	0	2	1	1	0	0	0	0	0	8.92316	8.92316	9.89315	9.48344	9.48822	8.92316	8.92316	8.92316	8.92316	8.92316	chr19	47283020	47314166	-	19_47388656_47357511_-31145|15.58|1|2	PMID:25714049	NM_008018	Sh3pxd2a	exonic	330
chr4:107028193-107040033+	2.81595	9.04099	6.13684	0.0244421	0.450865	up	0	2	2	0	0	0	0	0	0	0	8.92316	9.87826	9.89315	8.92316	8.92316	8.92316	8.92316	8.92316	8.92316	8.92316	chr4	107028192	107040033	+	4_106712638_106700798_-11840|14.65|2|2	PMID:25714049	NM_023672	Ssbp3	exonic	480
chr18:82674307-82682287-	2.81589	9.07528	6.02505	0.0244421	0.450865	up	0	1	0	1	2	0	0	0	0	0	8.92316	9.47834	8.92316	9.48344	9.89321	8.92316	8.92316	8.92316	8.92316	8.92316	chr18	82674306	82682287	-	mmu_circ_0000908	circBase	NM_177832	Zfp236	exonic	487
chr16:93762033-93764044+	2.81589	9.10351	5.77979	0.0244421	0.450865	up	0	0	2	2	0	0	0	0	0	0	8.92316	8.92316	9.89315	9.88598	8.92316	8.92316	8.92316	8.92316	8.92316	8.92316	chr16	93762032	93764044	+	16_93764289_93762278_-2011|18.09|7|13	PMID:25714049	NM_027293	Dopey2	exonic	1104
chr13:56723429-56736056+	2.81545	9.10729	5.75634	0.0244421	0.450865	up	0	1	2	0	1	0	0	0	0	0	8.92316	9.47834	9.89315	8.92316	9.48822	8.92316	8.92316	8.92316	8.92316	8.92316	chr13	56723428	56736056	+	13_56837417_56824790_-12627|23.39|5|6	PMID:25714049	NM_008541	Smad5	exonic	1419
chr10:26793113-26795045+	2.81536	9.10899	5.74521	0.0244421	0.450865	up	0	1	0	0	3	0	0	0	0	0	8.92316	9.47834	8.92316	8.92316	10.2091	8.92316	8.92316	8.92316	8.92316	8.92316	chr10	26793112	26795045	+		novel	ENSMUST00000039557	Arhgap18	intronic	1933
chr9:66371786-66376412+	2.81517	9.05638	6.08564	0.0244421	0.450865	up	0	0	0	4	0	0	0	0	0	0	8.92316	8.92316	8.92316	10.4583	8.92316	8.92316	8.92316	8.92316	8.92316	8.92316	chr9	66371785	66376412	+	9_66224219_66219593_-4626|22.34|9|16	PMID:25714049	NM_145617	Herc1	exonic	1052
chr5:23450152-23486400+	2.81451	9.02472	6.03848	0.0244421	0.450865	up	0	2	1	1	0	0	0	0	0	0	8.92316	9.87826	9.48818	9.48344	8.92316	8.92316	8.92316	8.92316	8.92316	8.92316	chr5	23450151	23486400	+	5_22992218_22955970_-36248|21.57|5|6	PMID:25714049	NM_026984	Kmt2e	exonic	1836
chr1:56845576-56899117-	2.81435	9.09151	5.89652	0.0244421	0.450865	up	0	1	1	1	1	0	0	0	0	0	8.92316	9.47834	9.48818	9.48344	9.48822	8.92316	8.92316	8.92316	8.92316	8.92316	chr1	56845575	56899117	-	1_56955961_56902420_-53541|22.09|2|2	PMID:25714049	NM_139146	Satb2	exonic	1196
chr5:53170357-53188082-	2.81419	9.19657	5.06686	0.0244421	0.450865	up	0	0	4	0	0	0	0	0	0	0	8.92316	8.92316	10.468	8.92316	8.92316	8.92316	8.92316	8.92316	8.92316	8.92316	chr5	53170356	53188082	-	5_53579321_53561596_-17725|13.46|12|40	PMID:25714049	NM_172710	Sel1l3	exonic	831
chr3:84208174-84210354-	2.8133	9.04094	6.1305	0.0244421	0.450865	up	0	2	1	1	0	0	0	0	0	0	8.92316	9.87826	9.48818	9.48344	8.92316	8.92316	8.92316	8.92316	8.92316	8.92316	chr3	84208173	84210354	-	3_84014276_84012096_-2180|15.04|5|10	PMID:25714049	NM_030706	Trim2	exonic	420
chr11:120967995-120973969-	2.8132	9.21549	4.97811	0.0256704	0.450865	up	0	0	3	0	1	0	0	0	0	0	8.92316	8.92316	10.209	8.92316	9.48822	8.92316	8.92316	8.92316	8.92316	8.92316	chr11	120967994	120973969	-	11_120835283_120829309_-5974|19.80|8|17	PMID:25714049	NM_027874	Csnk1d	exonic	1010
chr9:100757690-100803354+	2.81311	9.10902	5.7392	0.0244421	0.450865	up	0	1	0	1	2	0	0	0	0	0	8.92316	9.47834	8.92316	9.48344	9.89321	8.92316	8.92316	8.92316	8.92316	8.92316	chr9	100757689	100803354	+	9_100703773_100658109_-45664|19.66|11|32	PMID:25714049	NM_009282	Stag1	exonic	605
chr12:98688190-98689628-	2.81245	8.99122	6.46108	0.0244421	0.450865	up	0	3	0	0	1	0	0	0	0	0	8.92316	10.191	8.92316	8.92316	9.48822	8.92316	8.92316	8.92316	8.92316	8.92316	chr12	98688189	98689628	-		novel	NM_011877	Ptpn21	exonic	1439
chr6:112644588-112675930-	2.81245	8.99122	6.46108	0.0244421	0.450865	up	0	3	0	0	1	0	0	0	0	0	8.92316	10.191	8.92316	8.92316	9.48822	8.92316	8.92316	8.92316	8.92316	8.92316	chr6	112644587	112675930	-		novel	NM_021385	Rad18	exonic	726
chr1:149851267-149865253-	2.81245	8.99122	6.46108	0.0244421	0.450865	up	0	3	0	0	1	0	0	0	0	0	8.92316	10.191	8.92316	8.92316	9.48822	8.92316	8.92316	8.92316	8.92316	8.92316	chr1	149851266	149865253	-		novel	NM_008869	Pla2g4a	exonic	728
chr14:26646659-26647023+	2.81228	9.00793	6.04901	0.0244421	0.450865	up	0	3	1	0	0	0	0	0	0	0	8.92316	10.191	9.48818	8.92316	8.92316	8.92316	8.92316	8.92316	8.92316	8.92316	chr14	26646658	26647023	+	14_27466509_27466145_-364|18.43|10|17	PMID:25714049	NM_007479	Arf4	exonic	191
chr14:16383062-16389979+	2.81198	9.12588	5.60412	0.0244421	0.450865	up	0	1	2	1	0	0	0	0	0	0	8.92316	9.47834	9.89315	9.48344	8.92316	8.92316	8.92316	8.92316	8.92316	8.92316	chr14	16383061	16389979	+	14_17222493_17215576_-6917|13.72|3|4	PMID:25714049	NM_009409	Top2b	exonic	768
chr10:88892024-88921779+	2.81191	9.01982	5.93734	0.0244421	0.450865	up	0	3	0	0	1	0	0	0	0	0	8.92316	10.191	8.92316	8.92316	9.48822	8.92316	8.92316	8.92316	8.92316	8.92316	chr10	88892023	88921779	+		novel	NM_145423	Slc5a8	exonic	1279
chr5:137150652-137151029-	2.81158	9.17044	5.24328	0.0244421	0.450865	up	0	1	2	0	1	0	0	0	0	0	8.92316	9.47834	9.89315	8.92316	9.48822	8.92316	8.92316	8.92316	8.92316	8.92316	chr5	137150651	137151029	-		novel			intergenic	378
chr18:75080203-75126919+	2.81073	9.07604	6.00896	0.0244421	0.450865	up	0	2	1	1	0	0	0	0	0	0	8.92316	9.87826	9.48818	9.48344	8.92316	8.92316	8.92316	8.92316	8.92316	8.92316	chr18	75080202	75126919	+	18_75286573_75239857_-46716|18.17|11|15	PMID:25714049	NM_027727	Dym	exonic	966
chr6:94050641-94069200-	2.8106	9.04173	6.12161	0.0244421	0.450865	up	0	2	0	2	0	0	0	0	0	0	8.92316	9.87826	8.92316	9.88598	8.92316	8.92316	8.92316	8.92316	8.92316	8.92316	chr6	94050640	94069200	-	6_94019194_94000635_-18559|17.06|3|3	PMID:25714049	ENSMUST00000055224	Magi1	intronic	18560
chr1:82875288-82876324+	2.80956	8.99111	6.45775	0.0244421	0.450865	up	0	3	0	1	0	0	0	0	0	0	8.92316	10.191	8.92316	9.48344	8.92316	8.92316	8.92316	8.92316	8.92316	8.92316	chr1	82875287	82876324	+	1_82872899_82871863_-1036|19.14|3|3	PMID:25714049	NM_010472	Agfg1	exonic	317
chr12:4937387-4954657+	2.80923	9.2221	4.93537	0.0263128	0.450865	up	0	0	2	2	0	0	0	0	0	0	8.92316	8.92316	9.89315	9.88598	8.92316	8.92316	8.92316	8.92316	8.92316	8.92316	chr12	4937386	4954657	+	12_4961463_4944193_-17270|19.30|11|21	PMID:25070500	NM_001099628	Atad2b	exonic	972
chr4:94582481-94590074-	2.80904	9.22607	4.9178	0.0265818	0.450865	up	0	0	1	2	1	0	0	0	0	0	8.92316	8.92316	9.48818	9.88598	9.48822	8.92316	8.92316	8.92316	8.92316	8.92316	chr4	94582480	94590074	-	4_94256765_94249172_-7593|18.28|7|13	PMID:25714049	NM_172695	Plaa	exonic	1268
chr4:44893533-44895989+	2.80884	9.30657	4.62462	0.0315167	0.450865	up	0	0	0	0	4	0	0	0	0	0	8.92316	8.92316	8.92316	8.92316	10.468	8.92316	8.92316	8.92316	8.92316	8.92316	chr4	44893532	44895989	+	4_44908861_44906405_-2456|20.48|12|23	PMID:25714049	NM_138590	Zcchc7	exonic	335
chr6:87076257-87087478+	2.80884	9.02361	6.00715	0.0244421	0.450865	up	0	3	0	1	0	0	0	0	0	0	8.92316	10.191	8.92316	9.48344	8.92316	8.92316	8.92316	8.92316	8.92316	8.92316	chr6	87076256	87087478	+		novel	NM_013528	Gfpt1	exonic	852
chr1:177096967-177131096-	2.80829	9.11154	5.71005	0.0244421	0.450865	up	0	2	1	1	0	0	0	0	0	0	8.92316	9.87826	9.48818	9.48344	8.92316	8.92316	8.92316	8.92316	8.92316	8.92316	chr1	177096966	177131096	-	1_179061227_179027098_-34129|19.23|14|45	PMID:25714049	NM_011785	Akt3	exonic	515
chr10:108690884-108691063-	2.80648	8.99099	6.45421	0.0244421	0.450865	up	0	4	0	0	0	0	0	0	0	0	8.92316	10.4479	8.92316	8.92316	8.92316	8.92316	8.92316	8.92316	8.92316	8.92316	chr10	108690883	108691063	-		novel	NM_009306	Syt1	exonic	180
chr12:55757926-55777430-	2.80648	8.99099	6.45421	0.0244421	0.450865	up	0	4	0	0	0	0	0	0	0	0	8.92316	10.4479	8.92316	8.92316	8.92316	8.92316	8.92316	8.92316	8.92316	8.92316	chr12	55757925	55777430	-	12_56878417_56858913_-19504|18.36|2|3	PMID:25714049	NM_019994	Ralgapa1	exonic	921
chr11:57677329-57677524+	2.80648	8.99099	6.45421	0.0244421	0.450865	up	0	4	0	0	0	0	0	0	0	0	8.92316	10.4479	8.92316	8.92316	8.92316	8.92316	8.92316	8.92316	8.92316	8.92316	chr11	57677328	57677524	+		novel	ENSMUST00000066987	Galnt10	intronic	196
chr13:112487709-112490642+	2.8057	9.11586	5.67212	0.0244421	0.450865	up	0	3	0	0	1	0	0	0	0	0	8.92316	10.191	8.92316	8.92316	9.48822	8.92316	8.92316	8.92316	8.92316	8.92316	chr13	112487708	112490642	+	13_113280850_113277917_-2933|15.77|3|3	PMID:25714049	NM_010560	Il6st	exonic	476
chr3:56085242-56091120-	2.80483	9.04261	6.1043	0.0244421	0.450865	up	0	4	0	0	0	0	0	0	0	0	8.92316	10.4479	8.92316	8.92316	8.92316	8.92316	8.92316	8.92316	8.92316	8.92316	chr3	56085241	56091120	-	mmu_circ_0001133	circBase	NM_030595	Nbea	exonic	678
chr13:8835297-8861265-	2.80477	9.28655	4.67074	0.0306812	0.450865	up	0	0	1	3	0	0	0	0	0	0	8.92316	8.92316	9.48818	10.2004	8.92316	8.92316	8.92316	8.92316	8.92316	8.92316	chr13	8835296	8861265	-	13_8860511_8834543_-25968|12.70|12|17	PMID:25714049	NM_172445	Wdr37	exonic	1149
chr7:144445862-144446358-	2.80409	9.20535	5.00468	0.0252793	0.450865	up	0	2	1	1	0	0	0	0	0	0	8.92316	9.87826	9.48818	9.48344	8.92316	8.92316	8.92316	8.92316	8.92316	8.92316	chr7	144445861	144446358	-		novel	ENSMUST00000157079	Cttn	intronic	497
chr10:56123511-56151853-	2.80401	9.05862	6.05825	0.0244421	0.450865	up	0	4	0	0	0	0	0	0	0	0	8.92316	10.4479	8.92316	8.92316	8.92316	8.92316	8.92316	8.92316	8.92316	8.92316	chr10	56123510	56151853	-	mmu_circ_0000167	circBase	NM_001033385	Tbc1d32	exonic	413
chr18:65651560-65656632+	2.80397	9.10549	5.73751	0.0244421	0.450865	up	0	3	0	1	0	0	0	0	0	0	8.92316	10.191	8.92316	9.48344	8.92316	8.92316	8.92316	8.92316	8.92316	8.92316	chr18	65651559	65656632	+	mmu_circ_0000887	circBase	uc008fff.2	Zfp532	exonic	445
chr1:63085668-63093730-	2.80371	9.06435	6.04505	0.0244421	0.450865	up	0	4	0	0	0	0	0	0	0	0	8.92316	10.4479	8.92316	8.92316	8.92316	8.92316	8.92316	8.92316	8.92316	8.92316	chr1	63085667	63093730	-	1_63140304_63132242_-8062|14.37|2|2	PMID:25714049	NM_001081436	Ino80d	exonic	978
chr6:38440455-38464043+	2.80057	9.24913	4.80047	0.0284524	0.450865	up	0	3	1	0	0	0	0	0	0	0	8.92316	10.191	9.48818	8.92316	8.92316	8.92316	8.92316	8.92316	8.92316	8.92316	chr6	38440454	38464043	+	6_38414043_38390455_-23588|13.72|18|30	PMID:25714049	NM_177185	Ubn2	exonic	927
chr1:179784090-179786131-	2.80022	9.13953	5.43809	0.0244421	0.450865	up	0	4	0	0	0	0	0	0	0	0	8.92316	10.4479	8.92316	8.92316	8.92316	8.92316	8.92316	8.92316	8.92316	8.92316	chr1	179784089	179786131	-	1_181716262_181714221_-2041|17.81|16|53	PMID:25714049	NM_026375	Ahctf1	exonic	282
chr5:89084642-89179844+	2.79068	9.34456	5.41724	0.0199392	0.450865	up	5	0	2	1	4	0	0	0	1	0	10.5055	8.92316	9.89315	9.48344	10.468	8.92316	8.92316	8.92316	9.49515	8.92316	chr5	89084641	89179844	+	5_89608869_89513667_-95202|17.51|4|6	PMID:25714049	NM_018760	Slc4a4	exonic	1436
chr18:74798312-74799174+	2.78182	8.98998	6.4266	0.0244421	0.450865	up	1	0	0	0	3	0	0	0	0	0	9.40746	8.92316	8.92316	8.92316	10.2091	8.92316	8.92316	8.92316	8.92316	8.92316	chr18	74798311	74799174	+	18_74958828_74957966_-862|17.78|4|5	PMID:25714049	NM_177470	Acaa2	exonic	306
chr12:111778172-111789486+	2.78179	8.98998	6.42657	0.0244421	0.450865	up	1	0	1	0	2	0	0	0	0	0	9.40746	8.92316	9.48818	8.92316	9.89321	8.92316	8.92316	8.92316	8.92316	8.92316	chr12	111778171	111789486	+		novel	NM_008450	Klc1	sense overlapping	11315
chr14:23590641-23650186-	2.78175	9.00662	6.01855	0.0244421	0.450865	up	1	0	2	0	1	0	0	0	0	0	9.40746	8.92316	9.89315	8.92316	9.48822	8.92316	8.92316	8.92316	8.92316	8.92316	chr14	23590640	23650186	-		novel	NM_010610	Kcnma1	exonic	268
chr2:22332371-22340316+	2.78175	9.0082	5.97448	0.0244421	0.450865	up	1	0	2	0	1	0	0	0	0	0	9.40746	8.92316	9.89315	8.92316	9.48822	8.92316	8.92316	8.92316	8.92316	8.92316	chr2	22332370	22340316	+		novel	NM_148413	Myo3a	exonic	509
chr19:36969105-36990924+	2.78173	9.00791	5.9826	0.0244421	0.450865	up	1	0	3	0	0	0	0	0	0	0	9.40746	8.92316	10.209	8.92316	8.92316	8.92316	8.92316	8.92316	8.92316	8.92316	chr19	36969104	36990924	+		novel	AK145453		intronic	21820
chr5:137151701-137151880-	2.78165	9.02213	5.91831	0.0244421	0.450865	up	1	0	3	0	0	0	0	0	0	0	9.40746	8.92316	10.209	8.92316	8.92316	8.92316	8.92316	8.92316	8.92316	8.92316	chr5	137151700	137151880	-		novel			intergenic	180
chr14:79056647-79103696+	2.78165	9.02242	5.92378	0.0244421	0.450865	up	1	0	3	0	0	0	0	0	0	0	9.40746	8.92316	10.209	8.92316	8.92316	8.92316	8.92316	8.92316	8.92316	8.92316	chr14	79056646	79103696	+		novel	NM_027906	Vwa8	exonic	2188
chr18:79075394-79087180-	2.78154	9.0408	6.05215	0.0244421	0.450865	up	1	0	1	0	2	0	0	0	0	0	9.40746	8.92316	9.48818	8.92316	9.89321	8.92316	8.92316	8.92316	8.92316	8.92316	chr18	79075393	79087180	-	18_79283919_79272133_-11786|16.52|11|20	PMID:25714049	NM_053099	Setbp1	sense overlapping	11787
chr17:66087403-66089493-	2.78146	9.05471	5.99692	0.0244421	0.450865	up	1	0	0	0	3	0	0	0	0	0	9.40746	8.92316	8.92316	8.92316	10.2091	8.92316	8.92316	8.92316	8.92316	8.92316	chr17	66087402	66089493	-	17_66438833_66436743_-2090|14.24|14|24	PMID:25714049	NM_028388	Ndufv2	exonic	349
chr7:121047838-121052296+	2.78143	9.05467	5.99677	0.0244421	0.450865	up	1	0	1	0	2	0	0	0	0	0	9.40746	8.92316	9.48818	8.92316	9.89321	8.92316	8.92316	8.92316	8.92316	8.92316	chr7	121047837	121052296	+		novel	NM_021554	Mettl9	exonic	401
chr3:90427303-90428042-	2.78142	9.05963	5.99882	0.0244421	0.450865	up	1	0	0	0	3	0	0	0	0	0	9.40746	8.92316	8.92316	8.92316	10.2091	8.92316	8.92316	8.92316	8.92316	8.92316	chr3	90427302	90428042	-		novel	ENSMUST00000029542	Ints3	intronic	740
chr13:29691599-29717817-	2.78123	9.07699	5.92698	0.0244421	0.450865	up	1	0	2	0	1	0	0	0	0	0	9.40746	8.92316	9.89315	8.92316	9.48822	8.92316	8.92316	8.92316	8.92316	8.92316	chr13	29691598	29717817	-	13_29809686_29783468_-26218|17.13|11|14	PMID:25714049	NM_144536	Cdkal1	exonic	267
chr11:80250208-80251126+	2.78085	9.14211	5.35994	0.0244421	0.450865	up	1	0	1	0	2	0	0	0	0	0	9.40746	8.92316	9.48818	8.92316	9.89321	8.92316	8.92316	8.92316	8.92316	8.92316	chr11	80250207	80251126	+	mmu_circ_0000300	circBase	NM_021536	Rhot1	exonic	215
chr17:66500310-66506093-	2.77884	9.04228	6.04078	0.0244421	0.450865	up	1	0	0	1	2	0	0	0	0	0	9.40746	8.92316	8.92316	9.48344	9.89321	8.92316	8.92316	8.92316	8.92316	8.92316	chr17	66500309	66506093	-	17_66855433_66849650_-5783|22.00|3|4	PMID:25714049	NM_024448	Rab12	exonic	200
chr18:63755150-63779957+	2.77884	8.98986	6.42308	0.0244421	0.450865	up	1	0	2	1	0	0	0	0	0	0	9.40746	8.92316	9.89315	9.48344	8.92316	8.92316	8.92316	8.92316	8.92316	8.92316	chr18	63755149	63779957	+		novel	NM_001014981	Wdr7	sense overlapping	24808
chr13:89991073-89992606-	2.77875	9.10592	5.66808	0.0244421	0.450865	up	1	0	1	1	1	0	0	0	0	0	9.40746	8.92316	9.48818	9.48344	9.48822	8.92316	8.92316	8.92316	8.92316	8.92316	chr13	89991072	89992606	-	13_90132211_90130678_-1533|17.24|19|28	PMID:25714049	NM_028012	Xrcc4	exonic	245
chr8:77409548-77413627-	2.77875	9.08489	5.86911	0.0244421	0.450865	up	1	0	2	1	0	0	0	0	0	0	9.40746	8.92316	9.89315	9.48344	8.92316	8.92316	8.92316	8.92316	8.92316	8.92316	chr8	77409547	77413627	-	8_79937526_79933447_-4079|22.58|10|13	PMID:25714049	NM_030113	Arhgap10	exonic	332
chr4:48604581-48650418+	2.77874	9.18141	5.07986	0.0244421	0.450865	up	1	0	0	1	2	0	0	0	0	0	9.40746	8.92316	8.92316	9.48344	9.89321	8.92316	8.92316	8.92316	8.92316	8.92316	chr4	48604580	48650418	+	4_48663290_48617453_-45837|21.80|16|122	PMID:25714049	NM_021436	Tmeff1	exonic	703
chr11:43704534-43717149+	2.77872	9.2388	4.78644	0.0286851	0.450865	up	1	0	0	1	2	0	0	0	0	0	9.40746	8.92316	8.92316	9.48344	9.89321	8.92316	8.92316	8.92316	8.92316	8.92316	chr11	43704533	43717149	+	11_43530651_43518036_-12615|16.36|5|7	PMID:25714049	NM_001164231	Pwwp2a	exonic	1064
chr11:105240361-105247595+	2.77704	9.28404	4.61672	0.0316621	0.450865	up	1	0	1	2	0	0	0	0	0	0	9.40746	8.92316	9.48818	9.88598	8.92316	8.92316	8.92316	8.92316	8.92316	8.92316	chr11	105240360	105247595	+	11_105108909_105101675_-7234|16.98|9|15	PMID:25714049	NM_001112705	Tlk2	exonic	437
chr4:138096752-138097359+	2.77692	9.27738	4.64294	0.0311819	0.450865	up	1	1	0	0	2	0	0	0	0	0	9.40746	9.47834	8.92316	8.92316	9.89321	8.92316	8.92316	8.92316	8.92316	8.92316	chr4	138096751	138097359	+	4_137653274_137652667_-607|18.15|4|4	PMID:25714049	NM_172703	Eif4g3	exonic	295
chr1:56845576-56891265-	2.77679	9.2415	4.7688	0.0289804	0.450865	up	1	1	2	0	0	0	0	0	0	0	9.40746	9.47834	9.89315	8.92316	8.92316	8.92316	8.92316	8.92316	8.92316	8.92316	chr1	56845575	56891265	-	1_56948109_56902420_-45689|21.21|4|5	PMID:25714049	NM_139146	Satb2	exonic	945
chr13:75892906-75917847-	2.7765	9.10771	5.65128	0.0244421	0.450865	up	1	0	0	2	1	0	0	0	0	0	9.40746	8.92316	8.92316	9.88598	9.48822	8.92316	8.92316	8.92316	8.92316	8.92316	chr13	75892905	75917847	-	13_76055295_76030354_-24941|17.87|17|72	PMID:25714049	NM_028493	Rhobtb3	exonic	867
chr2:109131485-109137532-	2.77648	9.10514	5.66689	0.0244421	0.450865	up	1	0	0	2	1	0	0	0	0	0	9.40746	8.92316	8.92316	9.88598	9.48822	8.92316	8.92316	8.92316	8.92316	8.92316	chr2	109131484	109137532	-	2_108977689_108971642_-6047|16.07|11|28	PMID:25714049	NM_029790	Mettl15	exonic	371
chr8:94582884-94589407-	2.77593	9.00776	5.97432	0.0244421	0.450865	up	1	0	1	2	0	0	0	0	0	0	9.40746	8.92316	9.48818	9.88598	8.92316	8.92316	8.92316	8.92316	8.92316	8.92316	chr8	94582883	94589407	-		novel	NM_028221	Fam192a	exonic	587
chr13:30194536-30195787+	2.77593	9.03911	6.04187	0.0244421	0.450865	up	1	1	0	0	2	0	0	0	0	0	9.40746	9.47834	8.92316	8.92316	9.89321	8.92316	8.92316	8.92316	8.92316	8.92316	chr13	30194535	30195787	+		novel	NM_153546	Mboat1	exonic	224
chr5:65894299-65897239+	2.77592	8.98975	6.41964	0.0244421	0.450865	up	1	0	1	2	0	0	0	0	0	0	9.40746	8.92316	9.48818	9.88598	8.92316	8.92316	8.92316	8.92316	8.92316	8.92316	chr5	65894298	65897239	+		novel	AK042938		intronic	2941
chr1:93428148-93431518-	2.77592	8.98975	6.41964	0.0244421	0.450865	up	1	0	1	2	0	0	0	0	0	0	9.40746	8.92316	9.48818	9.88598	8.92316	8.92316	8.92316	8.92316	8.92316	8.92316	chr1	93428147	93431518	-		novel	NM_133808	Hdlbp	exonic	843
chr12:31790847-31802483+	2.77575	8.98975	6.41945	0.0244421	0.450865	up	1	1	0	0	2	0	0	0	0	0	9.40746	9.47834	8.92316	8.92316	9.89321	8.92316	8.92316	8.92316	8.92316	8.92316	chr12	31790846	31802483	+	12_32487348_32475712_-11636|18.67|14|59	PMID:25714049	NM_001163126	Cog5	exonic	357
chr10:121823037-121831912-	2.77406	9.10817	5.64211	0.0244421	0.450865	up	1	1	0	1	1	0	0	0	0	0	9.40746	9.47834	8.92316	9.48344	9.48822	8.92316	8.92316	8.92316	8.92316	8.92316	chr10	121823036	121831912	-	10_121268968_121260093_-8875|20.02|1|2	PMID:25714049	NM_001081037	Srgap1	exonic	405
chr9:65312418-65313715+	2.77382	9.32395	4.50072	0.0338811	0.450865	up	1	2	0	0	1	0	0	0	0	0	9.40746	9.87826	8.92316	8.92316	9.48822	8.92316	8.92316	8.92316	8.92316	8.92316	chr9	65312417	65313715	+		novel	ENSMUST00000113824	Clpx	intronic	1298
chr12:116317830-116334256+	2.77268	9.18111	5.06762	0.0244421	0.450865	up	1	1	0	2	0	0	0	0	0	0	9.40746	9.47834	8.92316	9.88598	8.92316	8.92316	8.92316	8.92316	8.92316	8.92316	chr12	116317829	116334256	+	12_117572729_117556303_-16426|22.45|16|32	PMID:25714049	NM_028731	Esyt2	exonic	473
chr10:12421597-12455564-	2.7724	9.15475	5.24743	0.0244421	0.450865	up	1	1	0	2	0	0	0	0	0	0	9.40746	9.47834	8.92316	9.88598	8.92316	8.92316	8.92316	8.92316	8.92316	8.92316	chr10	12421596	12455564	-	10_12175362_12141395_-33967|15.16|8|11	PMID:25714049	NM_011682	Utrn	exonic	862
chr3:98070860-98082039+	2.77235	9.16312	5.19525	0.0244421	0.450865	up	1	2	0	0	1	0	0	0	0	0	9.40746	9.87826	8.92316	8.92316	9.48822	8.92316	8.92316	8.92316	8.92316	8.92316	chr3	98070859	98082039	+	3_97885962_97874783_-11179|16.42|7|9	PMID:25714049	NM_010928	Notch2	exonic	719
chr12:111081724-111103805+	2.77174	9.11536	5.58682	0.0244421	0.450865	up	1	2	0	0	1	0	0	0	0	0	9.40746	9.87826	8.92316	8.92316	9.48822	8.92316	8.92316	8.92316	8.92316	8.92316	chr12	111081723	111103805	+	12_112342016_112319935_-22081|12.66|5|6	PMID:25714049	NM_198023	Rcor1	exonic	692
chr9:60850130-60854503+	2.7716	9.10635	5.64712	0.0244421	0.450865	up	1	2	0	0	1	0	0	0	0	0	9.40746	9.87826	8.92316	8.92316	9.48822	8.92316	8.92316	8.92316	8.92316	8.92316	chr9	60850129	60854503	+		novel	NM_028283	Uaca	exonic	366
chr11:62410820-62433699-	2.76991	9.02318	5.91144	0.0244421	0.450865	up	1	2	0	0	1	0	0	0	0	0	9.40746	9.87826	8.92316	8.92316	9.48822	8.92316	8.92316	8.92316	8.92316	8.92316	chr11	62410819	62433699	-	11_62247201_62224322_-22879|15.77|13|29	PMID:25714049	NM_011308	Ncor1	exonic	627
chr9:106434530-106436220-	2.7699	9.00559	6.02145	0.0244421	0.450865	up	1	1	0	2	0	0	0	0	0	0	9.40746	9.47834	8.92316	9.88598	8.92316	8.92316	8.92316	8.92316	8.92316	8.92316	chr9	106434529	106436220	-	9_106338551_106336861_-1690|17.85|3|3	PMID:25714049	NM_025371	Acy1	exonic	657
chr2:73845439-73846375-	2.76989	9.02233	5.89611	0.0244421	0.450865	up	1	2	0	0	1	0	0	0	0	0	9.40746	9.87826	8.92316	8.92316	9.48822	8.92316	8.92316	8.92316	8.92316	8.92316	chr2	73845438	73846375	-	2_73684432_73683496_-936|15.64|11|35	PMID:25714049	NM_009715	Atf2	exonic	294
chr2:10238739-10245618+	2.76967	8.98952	6.41225	0.0244421	0.450865	up	1	2	0	0	1	0	0	0	0	0	9.40746	9.87826	8.92316	8.92316	9.48822	8.92316	8.92316	8.92316	8.92316	8.92316	chr2	10238738	10245618	+		novel	NM_172471	Itih5	sense overlapping	6880
chr5:24126822-24128104+	2.76842	9.0728	5.90751	0.0244421	0.450865	up	1	2	0	1	0	0	0	0	0	0	9.40746	9.87826	8.92316	9.48344	8.92316	8.92316	8.92316	8.92316	8.92316	8.92316	chr5	24126821	24128104	+	5_23633922_23632640_-1282|15.42|8|10	PMID:25714049	NM_026448	Klhl7	exonic	322
chrX:47930371-47948360+	2.7668	9.10424	5.64731	0.0244421	0.450865	up	1	3	0	0	0	0	0	0	0	0	9.40746	10.191	8.92316	8.92316	8.92316	8.92316	8.92316	8.92316	8.92316	8.92316	chrX	47930370	47948360	+	X_45301537_45283548_-17989|14.90|15|33	PMID:25714049	NM_177215	Ocrl	exonic	1874
chr7:72259099-72259631-	2.76407	9.02547	5.9342	0.0244421	0.450865	up	1	3	0	0	0	0	0	0	0	0	9.40746	10.191	8.92316	8.92316	8.92316	8.92316	8.92316	8.92316	8.92316	8.92316	chr7	72259098	72259631	-		novel	NM_001024703	Mctp2	exonic	533
chr1:151401080-151405545-	2.76391	9.02124	5.8619	0.0244421	0.450865	up	1	3	0	0	0	0	0	0	0	0	9.40746	10.191	8.92316	8.92316	8.92316	8.92316	8.92316	8.92316	8.92316	8.92316	chr1	151401079	151405545	-	1_153252675_153248210_-4465|14.12|2|3	PMID:25714049	NM_025819	Swt1	exonic	515
chr17:81408067-81445593-	2.74741	9.20801	4.85575	0.0275546	0.450865	up	2	0	0	0	2	0	0	0	0	0	9.7694	8.92316	8.92316	8.92316	9.89321	8.92316	8.92316	8.92316	8.92316	8.92316	chr17	81408066	81445593	-	17_81844933_81807407_-37526|20.68|17|175	PMID:25714049	NM_011406	Slc8a1	exonic	737
chr2:60779731-60797742-	2.74687	9.19743	4.90016	0.0268546	0.450865	up	2	0	1	0	1	0	0	0	0	0	9.7694	8.92316	9.48818	8.92316	9.48822	8.92316	8.92316	8.92316	8.92316	8.92316	chr2	60779730	60797742	-	2_60635799_60617788_-18011|20.13|12|17	PMID:25714049	NM_020296	Rbms1	exonic	389
chr4:46025657-46029807+	2.74339	9.13501	5.33931	0.0244421	0.450865	up	2	0	2	0	0	0	0	0	0	0	9.7694	8.92316	9.89315	8.92316	8.92316	8.92316	8.92316	8.92316	8.92316	8.92316	chr4	46025656	46029807	+	4_46042679_46038529_-4150|17.47|7|10	PMID:25714049	NM_146142	Tdrd7	exonic	664
chr5:137149873-137150196-	2.74211	9.11579	5.50676	0.0244421	0.450865	up	2	0	0	0	2	0	0	0	0	0	9.7694	8.92316	8.92316	8.92316	9.89321	8.92316	8.92316	8.92316	8.92316	8.92316	chr5	137149872	137150196	-		novel			intergenic	324
chr1:97645542-97654689-	2.7412	9.1044	5.57963	0.0244421	0.450865	up	2	0	2	0	0	0	0	0	0	0	9.7694	8.92316	9.89315	8.92316	8.92316	8.92316	8.92316	8.92316	8.92316	8.92316	chr1	97645541	97654689	-	1_99551266_99542119_-9147|16.76|7|12	PMID:25714049	NM_133825	D1Ertd622e	sense overlapping	9148
chr5:73520116-73544155+	2.7407	9.16079	5.13166	0.0244421	0.450865	up	2	1	1	0	0	0	0	0	0	0	9.7694	9.47834	9.48818	8.92316	8.92316	8.92316	8.92316	8.92316	8.92316	8.92316	chr5	73520115	73544155	+	5_73935394_73911355_-24039|18.03|17|56	PMID:25714049	NM_178896	Dcun1d4	exonic	479
chr14:7894527-7896146+	2.7365	9.05643	5.88642	0.0244421	0.450865	up	2	0	2	0	0	0	0	0	0	0	9.7694	8.92316	9.89315	8.92316	8.92316	8.92316	8.92316	8.92316	8.92316	8.92316	chr14	7894526	7896146	+		novel	NM_134080	Flnb	sense overlapping	1620
chr16:45417880-45444165-	2.73562	9.12081	5.45086	0.0244421	0.450865	up	2	1	0	1	0	0	0	0	0	0	9.7694	9.47834	8.92316	9.48344	8.92316	8.92316	8.92316	8.92316	8.92316	8.92316	chr16	45417879	45444165	-		novel	ENSMUST00000144346	Gm609	exonic	2703
chr5:29437597-29440149+	2.73542	9.07115	5.82957	0.0244421	0.450865	up	2	0	1	1	0	0	0	0	0	0	9.7694	8.92316	9.48818	9.48344	8.92316	8.92316	8.92316	8.92316	8.92316	8.92316	chr5	29437596	29440149	+	5_29766689_29764137_-2552|15.35|3|3	PMID:25714049	NM_001033457	Nom1	exonic	520
chr7:134756877-134789285+	2.73524	9.09012	5.7063	0.0244421	0.450865	up	2	0	0	2	0	0	0	0	0	0	9.7694	8.92316	8.92316	9.88598	8.92316	8.92316	8.92316	8.92316	8.92316	8.92316	chr7	134756876	134789285	+	7_141980968_141948560_-32408|17.11|3|3	PMID:25714049	NM_001033420	Dock1	exonic	1215
chr5:102039850-102041743-	2.73489	9.0391	5.94223	0.0244421	0.450865	up	2	0	0	0	2	0	0	0	0	0	9.7694	8.92316	8.92316	8.92316	9.89321	8.92316	8.92316	8.92316	8.92316	8.92316	chr5	102039849	102041743	-	5_102470762_102468869_-1893|18.20|8|12	PMID:25714049	NM_172882	Wdfy3	sense overlapping	1894
chr12:11291526-11299429+	2.73471	9.03728	5.94312	0.0244421	0.450865	up	2	0	0	0	2	0	0	0	0	0	9.7694	8.92316	8.92316	8.92316	9.89321	8.92316	8.92316	8.92316	8.92316	8.92316	chr12	11291525	11299429	+		novel	NM_025695	Smc6	exonic	869
chr9:62068385-62088519-	2.73293	9.07164	5.81966	0.0244421	0.450865	up	2	0	0	2	0	0	0	0	0	0	9.7694	8.92316	8.92316	9.88598	8.92316	8.92316	8.92316	8.92316	8.92316	8.92316	chr9	62068384	62088519	-	9_61936326_61916192_-20134|21.09|12|54	PMID:25714049	uc009qae.1	Glce	exonic	936
chr15:82815611-82857284-	2.73261	9.08967	5.7043	0.0244421	0.450865	up	2	1	0	1	0	0	0	0	0	0	9.7694	9.47834	8.92316	9.48344	8.92316	8.92316	8.92316	8.92316	8.92316	8.92316	chr15	82815610	82857284	-		novel	NM_013836	Tcf20	exonic	5916
chr10:105303594-105370778-	2.73212	9.00245	6.02589	0.0244421	0.450865	up	2	0	2	0	0	0	0	0	0	0	9.7694	8.92316	9.89315	8.92316	8.92316	8.92316	8.92316	8.92316	8.92316	8.92316	chr10	105303593	105370778	-	10_104807834_104740650_-67184|15.90|2|2	PMID:25714049	NM_177368	Tmtc2	exonic	1416
chr11:21689568-21695305+	2.73114	9.09972	5.57883	0.0244421	0.450865	up	2	2	0	0	0	0	0	0	0	0	9.7694	9.87826	8.92316	8.92316	8.92316	8.92316	8.92316	8.92316	8.92316	8.92316	chr11	21689567	21695305	+	11_21595308_21589571_-5737|16.46|8|12	PMID:25714049	NM_145425	Wdpcp	exonic	441
chr15:12136396-12140652+	2.73114	9.05735	5.87348	0.0244421	0.450865	up	2	1	0	0	1	0	0	0	0	0	9.7694	9.47834	8.92316	8.92316	9.48822	8.92316	8.92316	8.92316	8.92316	8.92316	chr15	12136395	12140652	+	15_12070407_12066151_-4256|14.26|3|4	PMID:25714049	NM_011767	Zfr	exonic	647
chr11:63148984-63151259+	2.73089	9.05527	5.87153	0.0244421	0.450865	up	2	1	0	0	1	0	0	0	0	0	9.7694	9.47834	8.92316	8.92316	9.48822	8.92316	8.92316	8.92316	8.92316	8.92316	chr11	63148983	63151259	+		novel	NM_008885	Pmp22	sense overlapping	2276
chr5:124386830-124388660-	2.73008	9.02125	5.78702	0.0244421	0.450865	up	2	0	1	1	0	0	0	0	0	0	9.7694	8.92316	9.48818	9.48344	8.92316	8.92316	8.92316	8.92316	8.92316	8.92316	chr5	124386829	124388660	-		novel	NM_001081203	Sbno1	exonic	421
chrX:142805990-142834393+	2.72999	9.08941	5.7003	0.0244421	0.450865	up	2	2	0	0	0	0	0	0	0	0	9.7694	9.87826	8.92316	8.92316	8.92316	8.92316	8.92316	8.92316	8.92316	8.92316	chrX	142805989	142834393	+	X_139268936_139240533_-28403|15.52|1|2	PMID:25714049	NM_001199357	Tmem164	exonic	389
chr9:76996888-77027008-	2.72918	9.00459	5.9601	0.0244421	0.450865	up	2	0	1	1	0	0	0	0	0	0	9.7694	8.92316	9.48818	9.48344	8.92316	8.92316	8.92316	8.92316	8.92316	8.92316	chr9	76996887	77027008	-		novel	uc009qte.2	Tinag	exonic	750
chr1:152841025-152856611-	2.72902	8.98793	6.36444	0.0244421	0.450865	up	2	0	1	1	0	0	0	0	0	0	9.7694	8.92316	9.48818	9.48344	8.92316	8.92316	8.92316	8.92316	8.92316	8.92316	chr1	152841024	152856611	-		novel	NM_001005507	Smg7	exonic	2131
chr5:110719087-110756766-	2.72714	9.0211	5.77778	0.0244421	0.450865	up	2	0	0	2	0	0	0	0	0	0	9.7694	8.92316	8.92316	9.88598	8.92316	8.92316	8.92316	8.92316	8.92316	8.92316	chr5	110719086	110756766	-	5_111185785_111148106_-37679|19.68|2|2	PMID:25714049	NM_029337	Ep400	exonic	3333
chr1:155324314-155345654-	2.72602	8.98782	6.36079	0.0244421	0.450865	up	2	0	0	2	0	0	0	0	0	0	9.7694	8.92316	8.92316	9.88598	8.92316	8.92316	8.92316	8.92316	8.92316	8.92316	chr1	155324313	155345654	-	1_157192784_157171444_-21340|19.28|10|17	PMID:25714049	NM_011273	Xpr1	exonic	642
chr1:163392410-163397169-	2.7258	8.98781	6.36052	0.0244421	0.450865	up	2	1	1	0	0	0	0	0	0	0	9.7694	9.47834	9.48818	8.92316	8.92316	8.92316	8.92316	8.92316	8.92316	8.92316	chr1	163392409	163397169	-		novel	NM_178883	Gorab	exonic	601
chr18:80891815-80917878-	2.72219	9.29573	4.45305	0.0348394	0.450865	up	3	0	0	0	1	0	0	0	0	0	10.0585	8.92316	8.92316	8.92316	9.48822	8.92316	8.92316	8.92316	8.92316	8.92316	chr18	80891814	80917878	-	18_81114617_81088554_-26063|11.42|16|30	PMID:25714049	NM_015805	Atp9b	exonic	548
chr14:16254642-16294673+	2.7212	9.02359	5.80902	0.0244421	0.450865	up	2	2	0	0	0	0	0	0	0	0	9.7694	9.87826	8.92316	8.92316	8.92316	8.92316	8.92316	8.92316	8.92316	8.92316	chr14	16254641	16294673	+	14_17127187_17087156_-40031|15.66|2|2	PMID:25714049	NM_021504	Ngly1	exonic	1471
chr6:50427245-50428420-	2.7198	9.00561	5.91198	0.0244421	0.450865	up	2	2	0	0	0	0	0	0	0	0	9.7694	9.87826	8.92316	8.92316	8.92316	8.92316	8.92316	8.92316	8.92316	8.92316	chr6	50427244	50428420	-		novel	ENSMUST00000146341	Osbpl3	intronic	1176
chr1:10477025-10484063-	2.71957	8.98759	6.35291	0.0244421	0.450865	up	2	2	0	0	0	0	0	0	0	0	9.7694	9.87826	8.92316	8.92316	8.92316	8.92316	8.92316	8.92316	8.92316	8.92316	chr1	10477024	10484063	-	1_10474144_10467106_-7038|15.19|4|5	PMID:25714049	NM_177834	Cpa6	exonic	322
chr9:59426123-59436915-	2.71286	9.1967	4.82271	0.0280876	0.450865	up	3	0	1	0	0	0	0	0	0	0	10.0585	8.92316	9.48818	8.92316	8.92316	8.92316	8.92316	8.92316	8.92316	8.92316	chr9	59426122	59436915	-	mmu_circ_0015736	circBase	NM_019927	Arih1	exonic	294
chr2:33260478-33324703-	2.71213	9.19006	4.85867	0.0275079	0.450865	up	3	0	0	0	1	0	0	0	0	0	10.0585	8.92316	8.92316	8.92316	9.48822	8.92316	8.92316	8.92316	8.92316	8.92316	chr2	33260477	33324703	-	mmu_circ_0001004	circBase	NM_175211	Ralgps1	exonic	445
chr14:25502655-25581673+	2.70517	9.13186	5.2747	0.0244421	0.450865	up	3	0	0	0	1	0	0	0	0	0	10.0585	8.92316	8.92316	8.92316	9.48822	8.92316	8.92316	8.92316	8.92316	8.92316	chr14	25502654	25581673	+	mmu_circ_0000512	circBase	NM_183208	Zmiz1	exonic	514
chr2:29901077-29904107+	2.68662	9.03684	5.82865	0.0244421	0.450865	up	3	0	1	0	0	0	0	0	0	0	10.0585	8.92316	9.48818	8.92316	8.92316	8.92316	8.92316	8.92316	8.92316	8.92316	chr2	29901076	29904107	+	2_29759627_29756597_-3030|15.45|3|5	PMID:25714049	NM_013615	Odf2	exonic	594
chr6:99308344-99399717-	2.67778	8.986	6.30202	0.0244421	0.450865	up	3	0	0	1	0	0	0	0	0	0	10.0585	8.92316	8.92316	9.48344	8.92316	8.92316	8.92316	8.92316	8.92316	8.92316	chr6	99308343	99399717	-		novel	NM_053202	Foxp1	sense overlapping	91374
chr3:103344294-103344643+	2.6766	9.02039	5.65383	0.0244421	0.450865	up	3	1	0	0	0	0	0	0	0	0	10.0585	9.47834	8.92316	8.92316	8.92316	8.92316	8.92316	8.92316	8.92316	8.92316	chr3	103344293	103344643	+	3_103148566_103148217_-349|17.06|6|10	PMID:25714049	NM_053170	Trim33	exonic	350
chr19:45965164-45978712-	2.6765	9.02001	5.64589	0.0244421	0.450865	up	3	1	0	0	0	0	0	0	0	0	10.0585	9.47834	8.92316	8.92316	8.92316	8.92316	8.92316	8.92316	8.92316	8.92316	chr19	45965163	45978712	-	19_46053202_46039654_-13548|22.39|7|10	PMID:25714049	NM_198296	9130011E15Rik	exonic	680
chr10:105413217-105413787-	2.66559	9.64163	7.15306	0.00748382	0.450865	up	3	2	5	11	4	0	1	0	0	2	10.0585	9.87826	10.6874	11.5601	10.468	8.92316	9.49805	8.92316	8.92316	9.99923	chr10	105413216	105413787	-	10_104850843_104850273_-570|17.43|13|22	PMID:25714049	NM_177368	Tmtc2	exonic	571
chr8:33735734-33762103+	2.66005	9.10412	5.37653	0.0244421	0.450865	up	4	0	0	0	0	0	0	0	0	0	10.2992	8.92316	8.92316	8.92316	8.92316	8.92316	8.92316	8.92316	8.92316	8.92316	chr8	33735733	33762103	+	mmu_circ_0014792	circBase	NM_026584	Gtf2e2	exonic	650
chr14:64851885-64861626-	2.64862	9.06966	5.6226	0.0244421	0.450865	up	4	0	0	0	0	0	0	0	0	0	10.2992	8.92316	8.92316	8.92316	8.92316	8.92316	8.92316	8.92316	8.92316	8.92316	chr14	64851884	64861626	-	14_65480463_65470722_-9741|23.54|9|12	PMID:25714049	NM_177338	Hmbox1	exonic	265
chrX:101213774-101215578-	2.64443	9.53989	4.93375	0.0263375	0.450865	up	5	3	2	0	1	1	0	0	0	0	10.5055	10.191	9.89315	8.92316	9.48822	9.5523	8.92316	8.92316	8.92316	8.92316	chrX	101213773	101215578	-	mmu_circ_0001889	circBase	NM_018875	Snx12	exonic	312
chr11:23281306-23282726+	2.64226	9.05112	5.65675	0.0244421	0.450865	up	4	0	0	0	0	0	0	0	0	0	10.2992	8.92316	8.92316	8.92316	8.92316	8.92316	8.92316	8.92316	8.92316	8.92316	chr11	23281305	23282726	+	11_23182726_23181306_-1420|18.41|3|3	PMID:25714049	NM_134014	Xpo1	exonic	357
chr7:111597803-111599123-	2.64192	9.05006	5.65764	0.0244421	0.450865	up	4	0	0	0	0	0	0	0	0	0	10.2992	8.92316	8.92316	8.92316	8.92316	8.92316	8.92316	8.92316	8.92316	8.92316	chr7	111597802	111599123	-	7_118742637_118741317_-1320|17.73|15|50	PMID:25714049	NM_173739	Galnt18	sense overlapping	1321
chr19:6341903-6343176+	2.63713	9.03578	5.71241	0.0244421	0.450865	up	4	0	0	0	0	0	0	0	0	0	10.2992	8.92316	8.92316	8.92316	8.92316	8.92316	8.92316	8.92316	8.92316	8.92316	chr19	6341902	6343176	+	mmu_circ_0000931	circBase	NM_009006	Map4k2	exonic	285
chr17:45562002-45562400+	2.63063	9.0184	5.51435	0.0244421	0.450865	up	4	0	0	0	0	0	0	0	0	0	10.2992	8.92316	8.92316	8.92316	8.92316	8.92316	8.92316	8.92316	8.92316	8.92316	chr17	45562001	45562400	+	17_45699349_45698951_-398|15.09|2|2	PMID:25714049	NM_008690	Nfkbie	sense overlapping	399
chr12:78590534-78627260+	2.62861	9.00223	5.80651	0.0244421	0.450865	up	4	0	0	0	0	0	0	0	0	0	10.2992	8.92316	8.92316	8.92316	8.92316	8.92316	8.92316	8.92316	8.92316	8.92316	chr12	78590533	78627260	+	mmu_circ_0000394	circBase	NM_145965	Gphn	exonic	620
chr15:66629800-66630966+	2.62823	8.98418	6.23984	0.0244421	0.450865	up	4	0	0	0	0	0	0	0	0	0	10.2992	8.92316	8.92316	8.92316	8.92316	8.92316	8.92316	8.92316	8.92316	8.92316	chr15	66629799	66630966	+		novel	NM_001081409	Phf20l1	exonic	282
chr11:100596166-100601816-	2.62823	8.98418	6.23984	0.0244421	0.450865	up	4	0	0	0	0	0	0	0	0	0	10.2992	8.92316	8.92316	8.92316	8.92316	8.92316	8.92316	8.92316	8.92316	8.92316	chr11	100596165	100601816	-	11_100463130_100457480_-5650|22.37|2|3	PMID:25714049	NM_019795	Dnajc7	exonic	403
chrM:5357-6853+	2.62823	8.98418	6.23984	0.0244421	0.450865	up	4	0	0	0	0	0	0	0	0	0	10.2992	8.92316	8.92316	8.92316	8.92316	8.92316	8.92316	8.92316	8.92316	8.92316	chrM	5356	6853	+		novel	uc009vey.1	DQ539915	sense overlapping	1497
chr11:99010474-99021774-	2.62823	8.98418	6.23984	0.0244421	0.450865	up	4	0	0	0	0	0	0	0	0	0	10.2992	8.92316	8.92316	8.92316	8.92316	8.92316	8.92316	8.92316	8.92316	8.92316	chr11	99010473	99021774	-		novel	NM_011623	Top2a	exonic	1358
chr7:128709782-128714550-	2.62823	8.98418	6.23984	0.0244421	0.450865	up	4	0	0	0	0	0	0	0	0	0	10.2992	8.92316	8.92316	8.92316	8.92316	8.92316	8.92316	8.92316	8.92316	8.92316	chr7	128709781	128714550	-		novel	NM_145955	Mcmbp	exonic	432
chr4:44133640-44137661-	2.61251	9.22414	4.58893	0.0321795	0.450865	up	0	2	2	6	0	0	0	0	1	0	8.92316	9.87826	9.89315	10.867	8.92316	8.92316	8.92316	8.92316	9.49515	8.92316	chr4	44133639	44137661	-	4_44150533_44146512_-4021|17.08|16|76	PMID:25714049	NM_175201	Rnf38	exonic	314
chr2:167510876-167511326+	2.59293	9.38645	4.64217	0.0311959	0.450865	up	1	1	5	1	2	0	0	0	1	0	9.40746	9.47834	10.6874	9.48344	9.89321	8.92316	8.92316	8.92316	9.49515	8.92316	chr2	167510875	167511326	+	2_167336826_167336376_-450|16.30|15|43	PMID:25714049	NM_030743	Rnf114	exonic	222
chrY:90793296-90793680+	2.5818	9.2129	4.47853	0.0343237	0.450865	up	0	0	6	4	0	0	0	0	0	1	8.92316	8.92316	10.8779	10.4583	8.92316	8.92316	8.92316	8.92316	8.92316	9.55928	chrY	90793295	90793680	+		novel	uc029yhf.1	Erdr1	exonic	385
chr19:41232343-41256340-	2.57394	9.39957	4.58541	0.0322458	0.450865	up	2	2	2	2	2	0	0	0	1	0	9.7694	9.87826	9.89315	9.88598	9.89321	8.92316	8.92316	8.92316	9.49515	8.92316	chr19	41232342	41256340	-	19_41330830_41306833_-23997|19.36|13|27	PMID:25714049	NM_133352	Tm9sf3	exonic	1083
chr7:132949585-132960734+	2.55396	9.55211	4.55315	0.0328586	0.450865	up	2	1	4	3	0	1	0	0	0	0	9.7694	9.47834	10.468	10.2004	8.92316	9.5523	8.92316	8.92316	8.92316	8.92316	chr7	132949584	132960734	+	7_140152417_140141268_-11149|17.16|12|20	PMID:25714049	NM_207302	Zranb1	sense overlapping	11150
chr1:56891163-56974321-	2.55198	9.3616	4.49517	0.0339911	0.450865	up	2	0	6	2	0	0	0	0	0	1	9.7694	8.92316	10.8779	9.88598	8.92316	8.92316	8.92316	8.92316	8.92316	9.55928	chr1	56891162	56974321	-	1_57031165_56948007_-83158|15.32|1|2	PMID:25714049	NM_139146	Satb2	sense overlapping	83159
chr7:101290170-101300211-	2.48008	8.97503	6.07947	0.0513372	0.450865	up	0	0	0	0	3	0	0	0	0	0	8.92316	8.92316	8.92316	8.92316	10.2091	8.92316	8.92316	8.92316	8.92316	8.92316	chr7	101290169	101300211	-		novel	NM_001111111	Atg16l2	exonic	1657
chr12:54916739-54917067-	2.48008	8.97503	6.07947	0.0513372	0.450865	up	0	0	0	0	3	0	0	0	0	0	8.92316	8.92316	8.92316	8.92316	10.2091	8.92316	8.92316	8.92316	8.92316	8.92316	chr12	54916738	54917067	-		novel	NM_013815	Baz1a	sense overlapping	329
chr2:127803018-127819364-	2.48008	8.97503	6.07947	0.0513372	0.450865	up	0	0	0	0	3	0	0	0	0	0	8.92316	8.92316	8.92316	8.92316	10.2091	8.92316	8.92316	8.92316	8.92316	8.92316	chr2	127803017	127819364	-		novel	NM_009772	Bub1	exonic	2179
chr17:78934575-78935325-	2.48008	8.97503	6.07947	0.0513372	0.450865	up	0	0	0	0	3	0	0	0	0	0	8.92316	8.92316	8.92316	8.92316	10.2091	8.92316	8.92316	8.92316	8.92316	8.92316	chr17	78934574	78935325	-		novel	NM_001024806	Cebpz	sense overlapping	751
chr13:100219664-100223564-	2.48008	8.97503	6.07947	0.0513372	0.450865	up	0	0	0	0	3	0	0	0	0	0	8.92316	8.92316	8.92316	8.92316	10.2091	8.92316	8.92316	8.92316	8.92316	8.92316	chr13	100219663	100223564	-		novel	NM_010870	Naip5	exonic	2280
chr3:63801825-63803404-	2.48008	8.97503	6.07947	0.0513372	0.450865	up	0	0	0	0	3	0	0	0	0	0	8.92316	8.92316	8.92316	8.92316	10.2091	8.92316	8.92316	8.92316	8.92316	8.92316	chr3	63801824	63803404	-		novel	ENSMUST00000048134	Plch1	intronic	1580
chr4:43091228-43115160+	2.48008	8.99178	5.63168	0.0513372	0.450865	up	0	0	0	0	3	0	0	0	0	0	8.92316	8.92316	8.92316	8.92316	10.2091	8.92316	8.92316	8.92316	8.92316	8.92316	chr4	43091227	43115160	+	4_43128032_43104100_-23932|15.59|8|12	PMID:25714049	NM_021468	Unc13b	exonic	474
chr11:5085896-5086063-	2.48008	8.97503	6.07947	0.0513372	0.450865	up	0	0	0	0	3	0	0	0	0	0	8.92316	8.92316	8.92316	8.92316	10.2091	8.92316	8.92316	8.92316	8.92316	8.92316	chr11	5085895	5086063	-		novel	NM_007968	Ewsr1	exonic	168
chr11:103858895-103882941-	2.48008	8.97503	6.07947	0.0513372	0.450865	up	0	0	0	0	3	0	0	0	0	0	8.92316	8.92316	8.92316	8.92316	10.2091	8.92316	8.92316	8.92316	8.92316	8.92316	chr11	103858894	103882941	-	11_103744255_103720209_-24046|21.56|6|14	PMID:25714049	NM_008740	Nsf	exonic	1016
chr1:43755699-43765009-	2.48008	8.97503	6.07947	0.0513372	0.450865	up	0	0	0	0	3	0	0	0	0	0	8.92316	8.92316	8.92316	8.92316	10.2091	8.92316	8.92316	8.92316	8.92316	8.92316	chr1	43755698	43765009	-		novel	NM_026430	Uxs1	exonic	283
chr11:80106254-80133306+	2.48008	8.97503	6.07947	0.0513372	0.450865	up	0	0	0	0	3	0	0	0	0	0	8.92316	8.92316	8.92316	8.92316	10.2091	8.92316	8.92316	8.92316	8.92316	8.92316	chr11	80106253	80133306	+	11_79946808_79919756_-27052|13.04|1|2	PMID:25714049	NM_001029856	Atad5	exonic	2841
chr19:23703078-23708967+	2.48008	8.97503	6.07947	0.0513372	0.450865	up	0	0	0	0	3	0	0	0	0	0	8.92316	8.92316	8.92316	8.92316	10.2091	8.92316	8.92316	8.92316	8.92316	8.92316	chr19	23703077	23708967	+		novel	NM_028208	Ptar1	exonic	386
chr7:67617993-67619111-	2.48008	8.99323	5.59471	0.0513372	0.450865	up	0	0	0	0	3	0	0	0	0	0	8.92316	8.92316	8.92316	8.92316	10.2091	8.92316	8.92316	8.92316	8.92316	8.92316	chr7	67617992	67619111	-	7_74763997_74762879_-1118|19.63|11|22	PMID:25714049	NM_027413	Lrrc28	exonic	176
chr7:92653150-92665865-	2.48008	8.97503	6.07947	0.0513372	0.450865	up	0	0	0	0	3	0	0	0	0	0	8.92316	8.92316	8.92316	8.92316	10.2091	8.92316	8.92316	8.92316	8.92316	8.92316	chr7	92653149	92665865	-		novel	NM_029078	Pcf11	exonic	3559
chr18:88973518-88979716+	2.48008	8.97503	6.07947	0.0513372	0.450865	up	0	0	0	0	3	0	0	0	0	0	8.92316	8.92316	8.92316	8.92316	10.2091	8.92316	8.92316	8.92316	8.92316	8.92316	chr18	88973517	88979716	+	18_89149108_89142910_-6198|13.14|3|3	PMID:25714049	NM_175542	Rttn	exonic	625
chr17:17529701-17575387-	2.48008	8.97503	6.07947	0.0513372	0.450865	up	0	0	0	0	3	0	0	0	0	0	8.92316	8.92316	8.92316	8.92316	10.2091	8.92316	8.92316	8.92316	8.92316	8.92316	chr17	17529700	17575387	-	17_17712351_17666665_-45686|10.93|5|7	PMID:25714049	NM_172827	Lnpep	sense overlapping	45687
chr4:111779000-111784843+	2.48008	8.97503	6.07947	0.0513372	0.450865	up	0	0	0	0	3	0	0	0	0	0	8.92316	8.92316	8.92316	8.92316	10.2091	8.92316	8.92316	8.92316	8.92316	8.92316	chr4	111778999	111784843	+		novel	NM_026470	Spata6	exonic	423
chr2:72031033-72045248+	2.48002	8.99186	5.62967	0.0513372	0.450865	up	0	0	2	0	1	0	0	0	0	0	8.92316	8.92316	9.89315	8.92316	9.48822	8.92316	8.92316	8.92316	8.92316	8.92316	chr2	72031032	72045248	+	2_71883305_71869090_-14215|23.09|14|45	PMID:25714049	NM_019688	Rapgef4	exonic	379
chr15:33249926-33343912+	2.48002	8.97503	6.07938	0.0513372	0.450865	up	0	0	2	0	1	0	0	0	0	0	8.92316	8.92316	9.89315	8.92316	9.48822	8.92316	8.92316	8.92316	8.92316	8.92316	chr15	33249925	33343912	+		novel	NM_018755	Cpq	sense overlapping	93987
chr12:55683907-55709707-	2.48002	8.97503	6.07938	0.0513372	0.450865	up	0	0	2	0	1	0	0	0	0	0	8.92316	8.92316	9.89315	8.92316	9.48822	8.92316	8.92316	8.92316	8.92316	8.92316	chr12	55683906	55709707	-	12_56810694_56784894_-25800|18.88|4|9	PMID:25714049	NM_019994	Ralgapa1	exonic	1371
chr5:100402215-100408113-	2.48002	8.97503	6.07938	0.0513372	0.450865	up	0	0	2	0	1	0	0	0	0	0	8.92316	8.92316	9.89315	8.92316	9.48822	8.92316	8.92316	8.92316	8.92316	8.92316	chr5	100402214	100408113	-		novel	NM_026969	Sec31a	exonic	640
chr3:40961608-40964142+	2.47999	8.97503	6.07933	0.0513372	0.450865	up	0	0	3	0	0	0	0	0	0	0	8.92316	8.92316	10.209	8.92316	8.92316	8.92316	8.92316	8.92316	8.92316	8.92316	chr3	40961607	40964142	+	3_40768064_40765530_-2534|15.88|4|6	PMID:25714049	NM_001040399	Larp1b	exonic	294
chr19:17400093-17401167+	2.47999	8.97503	6.07933	0.0513372	0.450865	up	0	0	3	0	0	0	0	0	0	0	8.92316	8.92316	10.209	8.92316	8.92316	8.92316	8.92316	8.92316	8.92316	8.92316	chr19	17400092	17401167	+		novel	NM_019437	Rfk	sense overlapping	1075
chr9:62919351-62952200-	2.47999	8.99339	5.59032	0.0513372	0.450865	up	0	0	3	0	0	0	0	0	0	0	8.92316	8.92316	10.209	8.92316	8.92316	8.92316	8.92316	8.92316	8.92316	8.92316	chr9	62919350	62952200	-		novel	NM_019663	Pias1	exonic	804
chr8:12632238-12641207-	2.47999	8.99178	5.63155	0.0513372	0.450865	up	0	0	3	0	0	0	0	0	0	0	8.92316	8.92316	10.209	8.92316	8.92316	8.92316	8.92316	8.92316	8.92316	8.92316	chr8	12632237	12641207	-	8_12641207_12632238_-8969|18.72|3|5	PMID:25714049	NM_198031	Tubgcp3	exonic	751
chr5:135210741-135222096+	2.47999	8.97503	6.07933	0.0513372	0.450865	up	0	0	3	0	0	0	0	0	0	0	8.92316	8.92316	10.209	8.92316	8.92316	8.92316	8.92316	8.92316	8.92316	8.92316	chr5	135210740	135222096	+	5_135697966_135686611_-11355|19.05|1|2	PMID:25714049	NM_011714	Baz1b	exonic	2042
chr5:150722295-150728974+	2.47999	8.97503	6.07933	0.0513372	0.450865	up	0	0	3	0	0	0	0	0	0	0	8.92316	8.92316	10.209	8.92316	8.92316	8.92316	8.92316	8.92316	8.92316	8.92316	chr5	150722294	150728974	+		novel	NM_175310	Pds5b	exonic	393
chr16:31805614-31838226+	2.47999	8.99178	5.63155	0.0513372	0.450865	up	0	0	3	0	0	0	0	0	0	0	8.92316	8.92316	10.209	8.92316	8.92316	8.92316	8.92316	8.92316	8.92316	8.92316	chr16	31805613	31838226	+	16_31838312_31805700_-32612|15.53|8|11	PMID:25714049	NM_007862	Dlg1	exonic	673
chr8:109853673-109861685-	2.47999	8.97503	6.07933	0.0513372	0.450865	up	0	0	3	0	0	0	0	0	0	0	8.92316	8.92316	10.209	8.92316	8.92316	8.92316	8.92316	8.92316	8.92316	8.92316	chr8	109853672	109861685	-		novel	ENSMUST00000173980	Gm17344	sense overlapping	8013
chr2:94342627-94386181-	2.47999	8.97503	6.07933	0.0513372	0.450865	up	0	0	3	0	0	0	0	0	0	0	8.92316	8.92316	10.209	8.92316	8.92316	8.92316	8.92316	8.92316	8.92316	8.92316	chr2	94342626	94386181	-		novel	NM_183106	Ttc17	exonic	2263
chr2:116000131-116043311-	2.47999	8.97503	6.07933	0.0513372	0.450865	up	0	0	3	0	0	0	0	0	0	0	8.92316	8.92316	10.209	8.92316	8.92316	8.92316	8.92316	8.92316	8.92316	8.92316	chr2	116000130	116043311	-		novel	NM_010825	Meis2	sense overlapping	43181
chr15:37931602-37953754-	2.47999	8.97503	6.07933	0.0513372	0.450865	up	0	0	3	0	0	0	0	0	0	0	8.92316	8.92316	10.209	8.92316	8.92316	8.92316	8.92316	8.92316	8.92316	8.92316	chr15	37931601	37953754	-		novel	NM_199476	Rrm2b	exonic	741
chr5:45674358-45681906+	2.47999	8.97503	6.07933	0.0513372	0.450865	up	0	0	3	0	0	0	0	0	0	0	8.92316	8.92316	10.209	8.92316	8.92316	8.92316	8.92316	8.92316	8.92316	8.92316	chr5	45674357	45681906	+		novel	NM_019438	Ncapg	exonic	1103
chr13:100166469-100197124-	2.47999	8.97503	6.07933	0.0513372	0.450865	up	0	0	3	0	0	0	0	0	0	0	8.92316	8.92316	10.209	8.92316	8.92316	8.92316	8.92316	8.92316	8.92316	8.92316	chr13	100166468	100197124	-		novel	NM_010872	Naip2	exonic	1150
chr3:145005004-145007875-	2.47999	8.97503	6.07933	0.0513372	0.450865	up	0	0	3	0	0	0	0	0	0	0	8.92316	8.92316	10.209	8.92316	8.92316	8.92316	8.92316	8.92316	8.92316	8.92316	chr3	145005003	145007875	-		novel	NM_017474	Clca1	sense overlapping	2872
chr9:44694029-44711922-	2.47999	8.97503	6.07933	0.0513372	0.450865	up	0	0	3	0	0	0	0	0	0	0	8.92316	8.92316	10.209	8.92316	8.92316	8.92316	8.92316	8.92316	8.92316	8.92316	chr9	44694028	44711922	-		novel	NM_153537	Phldb1	exonic	2056
chr19:59299435-59305320-	2.47999	8.99315	5.59632	0.0513372	0.450865	up	0	0	3	0	0	0	0	0	0	0	8.92316	8.92316	10.209	8.92316	8.92316	8.92316	8.92316	8.92316	8.92316	8.92316	chr19	59299434	59305320	-		novel	NM_001033222	Pdzd8	sense overlapping	5886
chr6:92139780-92164293+	2.47999	8.97503	6.07933	0.0513372	0.450865	up	0	0	3	0	0	0	0	0	0	0	8.92316	8.92316	10.209	8.92316	8.92316	8.92316	8.92316	8.92316	8.92316	8.92316	chr6	92139779	92164293	+	6_92114287_92089774_-24513|22.84|3|3	PMID:25714049	NM_011630	Nr2c2	exonic	1655
chr17:34596124-34596386+	2.47999	8.97503	6.07933	0.0513372	0.450865	up	0	0	3	0	0	0	0	0	0	0	8.92316	8.92316	10.209	8.92316	8.92316	8.92316	8.92316	8.92316	8.92316	8.92316	chr17	34596123	34596386	+		novel	NM_017463	Pbx2	sense overlapping	263
chrX:79458429-79482734-	2.47999	8.97503	6.07933	0.0513372	0.450865	up	0	0	3	0	0	0	0	0	0	0	8.92316	8.92316	10.209	8.92316	8.92316	8.92316	8.92316	8.92316	8.92316	8.92316	chrX	79458428	79482734	-		novel	NM_001099307	Gm7173	sense overlapping	24306
chr6:5077480-5115480+	2.47999	8.99127	5.64465	0.0513372	0.450865	up	0	0	3	0	0	0	0	0	0	0	8.92316	8.92316	10.209	8.92316	8.92316	8.92316	8.92316	8.92316	8.92316	8.92316	chr6	5077479	5115480	+	6_5065480_5027480_-38000|19.80|5|5	PMID:25714049	NM_181595	Ppp1r9a	exonic	845
chr18:36600766-36614817+	2.47999	8.97503	6.07933	0.0513372	0.450865	up	0	0	3	0	0	0	0	0	0	0	8.92316	8.92316	10.209	8.92316	8.92316	8.92316	8.92316	8.92316	8.92316	8.92316	chr18	36600765	36614817	+		novel	NM_175375	Ankhd1	exonic	573
chr19:28654648-28666236-	2.47999	8.99314	5.59676	0.0513372	0.450865	up	0	0	3	0	0	0	0	0	0	0	8.92316	8.92316	10.209	8.92316	8.92316	8.92316	8.92316	8.92316	8.92316	8.92316	chr19	28654647	28666236	-		novel	NM_175459	Glis3	sense overlapping	11589
chr4:106690215-106703191-	2.47999	8.97503	6.07933	0.0513372	0.450865	up	0	0	3	0	0	0	0	0	0	0	8.92316	8.92316	10.209	8.92316	8.92316	8.92316	8.92316	8.92316	8.92316	8.92316	chr4	106690214	106703191	-	4_106375796_106362820_-12976|17.15|2|4	PMID:25714049	NM_001126487	Mroh7	exonic	1515
chr12:40212310-40217482-	2.47999	8.97503	6.07933	0.0513372	0.450865	up	0	0	3	0	0	0	0	0	0	0	8.92316	8.92316	10.209	8.92316	8.92316	8.92316	8.92316	8.92316	8.92316	8.92316	chr12	40212309	40217482	-		novel	NM_013562	Ifrd1	exonic	812
chr7:110810925-110811418+	2.47999	8.97503	6.07933	0.0513372	0.450865	up	0	0	3	0	0	0	0	0	0	0	8.92316	8.92316	10.209	8.92316	8.92316	8.92316	8.92316	8.92316	8.92316	8.92316	chr7	110810924	110811418	+		novel	NM_009667	Ampd3	sense overlapping	494
chr16:11399765-11403832+	2.47999	8.97503	6.07933	0.0513372	0.450865	up	0	0	3	0	0	0	0	0	0	0	8.92316	8.92316	10.209	8.92316	8.92316	8.92316	8.92316	8.92316	8.92316	8.92316	chr16	11399764	11403832	+	16_11403925_11399858_-4067|21.44|2|2	PMID:25714049	NM_028964	Snx29	exonic	693
chr11:62358855-62373622-	2.47999	8.97503	6.07933	0.0513372	0.450865	up	0	0	3	0	0	0	0	0	0	0	8.92316	8.92316	10.209	8.92316	8.92316	8.92316	8.92316	8.92316	8.92316	8.92316	chr11	62358854	62373622	-	11_62187124_62172357_-14767|15.30|2|3	PMID:25714049	NM_001252313	Ncor1	exonic	1034
chr16:15915300-15968717-	2.47999	8.97503	6.07933	0.0513372	0.450865	up	0	0	3	0	0	0	0	0	0	0	8.92316	8.92316	10.209	8.92316	8.92316	8.92316	8.92316	8.92316	8.92316	8.92316	chr16	15915299	15968717	-		novel	NM_146068	Spidr	exonic	670
chr19:41212891-41214213-	2.47999	8.97503	6.07933	0.0513372	0.450865	up	0	0	3	0	0	0	0	0	0	0	8.92316	8.92316	10.209	8.92316	8.92316	8.92316	8.92316	8.92316	8.92316	8.92316	chr19	41212890	41214213	-		novel	NM_133352	Tm9sf3	sense overlapping	1323
chr8:84556704-84588859+	2.47999	8.97503	6.07933	0.0513372	0.450865	up	0	0	3	0	0	0	0	0	0	0	8.92316	8.92316	10.209	8.92316	8.92316	8.92316	8.92316	8.92316	8.92316	8.92316	chr8	84556703	84588859	+		novel	NM_007578	Cacna1a	exonic	2541
chr8:33280772-33305760-	2.47999	8.97503	6.07933	0.0513372	0.450865	up	0	0	3	0	0	0	0	0	0	0	8.92316	8.92316	10.209	8.92316	8.92316	8.92316	8.92316	8.92316	8.92316	8.92316	chr8	33280771	33305760	-		novel	NM_011721	Wrn	exonic	989
chr9:77775079-77776308+	2.47999	8.97503	6.07933	0.0513372	0.450865	up	0	0	3	0	0	0	0	0	0	0	8.92316	8.92316	10.209	8.92316	8.92316	8.92316	8.92316	8.92316	8.92316	8.92316	chr9	77775078	77776308	+		novel	NM_010295	Gclc	exonic	296
chr19:57152273-57173459-	2.47982	9.00733	5.29074	0.0513372	0.450865	up	0	0	0	0	3	0	0	0	0	0	8.92316	8.92316	8.92316	8.92316	10.2091	8.92316	8.92316	8.92316	8.92316	8.92316	chr19	57152272	57173459	-	19_57247949_57226763_-21186|18.24|5|5	PMID:25714049	NM_178688	Ablim1	exonic	429
chr2:10185519-10190450+	2.47976	9.00983	5.22737	0.0513372	0.450865	up	0	0	0	0	3	0	0	0	0	0	8.92316	8.92316	8.92316	8.92316	10.2091	8.92316	8.92316	8.92316	8.92316	8.92316	chr2	10185518	10190450	+		novel	NM_172471	Itih5	exonic	517
chr10:58285943-58292782+	2.47973	9.00984	5.22704	0.0513372	0.450865	up	0	0	1	0	2	0	0	0	0	0	8.92316	8.92316	9.48818	8.92316	9.89321	8.92316	8.92316	8.92316	8.92316	8.92316	chr10	58285942	58292782	+		novel	NM_027375	Gcc2	exonic	834
chr11:98996729-99001441-	2.47973	9.01112	5.19475	0.0513372	0.450865	up	0	0	0	0	3	0	0	0	0	0	8.92316	8.92316	8.92316	8.92316	10.2091	8.92316	8.92316	8.92316	8.92316	8.92316	chr11	98996728	99001441	-		novel	NM_011623	Top2a	exonic	759
chr11:35883248-35898695-	2.47971	9.00809	5.27126	0.0513372	0.450865	up	0	0	3	0	0	0	0	0	0	0	8.92316	8.92316	10.209	8.92316	8.92316	8.92316	8.92316	8.92316	8.92316	8.92316	chr11	35883247	35898695	-	11_35712197_35696750_-15447|20.24|8|10	PMID:25714049	NM_170779	Wwc1	exonic	751
chr13:55295987-55302980+	2.47828	9.02588	5.21984	0.0513372	0.450865	up	0	0	0	0	3	0	0	0	0	0	8.92316	8.92316	8.92316	8.92316	10.2091	8.92316	8.92316	8.92316	8.92316	8.92316	chr13	55295986	55302980	+		novel	NM_008739	Nsd1	exonic	848
chr16:32023089-32031701-	2.47793	9.02798	5.23339	0.0513372	0.450865	up	0	0	3	0	0	0	0	0	0	0	8.92316	8.92316	10.209	8.92316	8.92316	8.92316	8.92316	8.92316	8.92316	8.92316	chr16	32023088	32031701	-	16_32031787_32023175_-8612|19.77|5|6	PMID:25714049	NM_177326	Pak2	exonic	415
chr16:96023403-96043094-	2.47647	8.97492	6.07404	0.0513372	0.450865	up	0	0	2	1	0	0	0	0	0	0	8.92316	8.92316	9.89315	9.48344	8.92316	8.92316	8.92316	8.92316	8.92316	8.92316	chr16	96023402	96043094	-		novel	NM_145125	Brwd1	exonic	1404
chr11:44524928-44542720+	2.47647	8.99636	5.50732	0.0513372	0.450865	up	0	0	2	1	0	0	0	0	0	0	8.92316	8.92316	9.89315	9.48344	8.92316	8.92316	8.92316	8.92316	8.92316	8.92316	chr11	44524927	44542720	+	11_44356222_44338430_-17792|20.96|4|4	PMID:25714049	NM_028862	Rnf145	exonic	417
chr3:105731956-105737898-	2.47647	8.97492	6.07404	0.0513372	0.450865	up	0	0	2	1	0	0	0	0	0	0	8.92316	8.92316	9.89315	9.48344	8.92316	8.92316	8.92316	8.92316	8.92316	8.92316	chr3	105731955	105737898	-		novel	NM_145541	Rap1a	exonic	260
chr4:131967788-131982540-	2.47647	8.97492	6.07404	0.0513372	0.450865	up	0	0	2	1	0	0	0	0	0	0	8.92316	8.92316	9.89315	9.48344	8.92316	8.92316	8.92316	8.92316	8.92316	8.92316	chr4	131967787	131982540	-	mmu_circ_0011272	circBase	NM_183428	Epb4.1	exonic	700
chr3:14777729-14777926-	2.47647	8.97492	6.07404	0.0513372	0.450865	up	0	0	2	1	0	0	0	0	0	0	8.92316	8.92316	9.89315	9.48344	8.92316	8.92316	8.92316	8.92316	8.92316	8.92316	chr3	14777728	14777926	-		novel	NM_009799	Car1	exonic	198
chr12:82355787-82372542+	2.47647	8.97492	6.07404	0.0513372	0.450865	up	0	0	2	1	0	0	0	0	0	0	8.92316	8.92316	9.89315	9.48344	8.92316	8.92316	8.92316	8.92316	8.92316	8.92316	chr12	82355786	82372542	+		novel	NM_172579	Sipa1l1	sense overlapping	16756
chr18:20033062-20048394-	2.47647	8.99303	5.59187	0.0513372	0.450865	up	0	0	2	1	0	0	0	0	0	0	8.92316	8.92316	9.89315	9.48344	8.92316	8.92316	8.92316	8.92316	8.92316	8.92316	chr18	20033061	20048394	-		novel	NM_013505	Dsc2	exonic	2157
chr11:58384713-58390505+	2.47647	8.97492	6.07404	0.0513372	0.450865	up	0	0	2	1	0	0	0	0	0	0	8.92316	8.92316	9.89315	9.48344	8.92316	8.92316	8.92316	8.92316	8.92316	8.92316	chr11	58384712	58390505	+		novel	NM_027339	Lypd8	sense overlapping	5793
chr12:85857380-85939510+	2.47647	8.97492	6.07404	0.0513372	0.450865	up	0	0	2	1	0	0	0	0	0	0	8.92316	8.92316	9.89315	9.48344	8.92316	8.92316	8.92316	8.92316	8.92316	8.92316	chr12	85857379	85939510	+		novel	NM_001081423	Ttll5	exonic	2714
chr9:107538018-107538179+	2.47647	8.97492	6.07404	0.0513372	0.450865	up	0	0	2	1	0	0	0	0	0	0	8.92316	8.92316	9.89315	9.48344	8.92316	8.92316	8.92316	8.92316	8.92316	8.92316	chr9	107538017	107538179	+		novel	NM_019704	Tmem115	sense overlapping	162
chr19:14454741-14466701-	2.47647	8.97492	6.07404	0.0513372	0.450865	up	0	0	2	1	0	0	0	0	0	0	8.92316	8.92316	9.89315	9.48344	8.92316	8.92316	8.92316	8.92316	8.92316	8.92316	chr19	14454740	14466701	-		novel	NM_011600	Tle4	exonic	807
chr9:65034875-65045788+	2.47647	8.9932	5.58757	0.0513372	0.450865	up	0	0	2	1	0	0	0	0	0	0	8.92316	8.92316	9.89315	9.48344	8.92316	8.92316	8.92316	8.92316	8.92316	8.92316	chr9	65034874	65045788	+	9_64893595_64882682_-10913|11.10|7|10	PMID:25714049	NM_028906	Dpp8	exonic	866
chr9:62844570-62849231+	2.47647	8.97492	6.07404	0.0513372	0.450865	up	0	0	2	1	0	0	0	0	0	0	8.92316	8.92316	9.89315	9.48344	8.92316	8.92316	8.92316	8.92316	8.92316	8.92316	chr9	62844569	62849231	+		novel	NM_001033175	Cln6	exonic	582
chr6:82749189-82760266-	2.47647	8.97492	6.07404	0.0513372	0.450865	up	0	0	2	1	0	0	0	0	0	0	8.92316	8.92316	9.89315	9.48344	8.92316	8.92316	8.92316	8.92316	8.92316	8.92316	chr6	82749188	82760266	-		novel	NM_013820	Hk2	exonic	312
chr13:100152070-100183838-	2.47647	8.97492	6.07404	0.0513372	0.450865	up	0	0	2	1	0	0	0	0	0	0	8.92316	8.92316	9.89315	9.48344	8.92316	8.92316	8.92316	8.92316	8.92316	8.92316	chr13	100152069	100183838	-		novel	NM_010872	Naip2	exonic	3146
chr5:150422710-150451220+	2.47647	8.97492	6.07404	0.0513372	0.450865	up	0	0	2	1	0	0	0	0	0	0	8.92316	8.92316	9.89315	9.48344	8.92316	8.92316	8.92316	8.92316	8.92316	8.92316	chr5	150422709	150451220	+		novel	NM_172887	Fry	exonic	2512
chr16:35318804-35348994-	2.47647	8.9932	5.58757	0.0513372	0.450865	up	0	0	2	1	0	0	0	0	0	0	8.92316	8.92316	9.89315	9.48344	8.92316	8.92316	8.92316	8.92316	8.92316	8.92316	chr16	35318803	35348994	-		novel	NM_133704	Sec22a	exonic	541
chr2:180138185-180138730+	2.47647	8.97492	6.07404	0.0513372	0.450865	up	0	0	2	1	0	0	0	0	0	0	8.92316	8.92316	9.89315	9.48344	8.92316	8.92316	8.92316	8.92316	8.92316	8.92316	chr2	180138184	180138730	+		novel	NM_144500	Osbpl2	sense overlapping	546
chr14:56748835-56762030-	2.47647	8.97492	6.07404	0.0513372	0.450865	up	0	0	2	1	0	0	0	0	0	0	8.92316	8.92316	9.89315	9.48344	8.92316	8.92316	8.92316	8.92316	8.92316	8.92316	chr14	56748834	56762030	-		novel	NM_025682	Pspc1	exonic	391
chr7:145256730-145258614-	2.47647	8.97492	6.07404	0.0513372	0.450865	up	0	0	2	1	0	0	0	0	0	0	8.92316	8.92316	9.89315	9.48344	8.92316	8.92316	8.92316	8.92316	8.92316	8.92316	chr7	145256729	145258614	-		novel	NM_146206	Tpcn2	exonic	328
chr4:122854163-122854378-	2.47647	8.97492	6.07404	0.0513372	0.450865	up	0	0	2	1	0	0	0	0	0	0	8.92316	8.92316	9.89315	9.48344	8.92316	8.92316	8.92316	8.92316	8.92316	8.92316	chr4	122854162	122854378	-		novel	NM_008917	Ppt1	antisense	216
chr2:103028276-103035389-	2.47647	8.97492	6.07404	0.0513372	0.450865	up	0	0	2	1	0	0	0	0	0	0	8.92316	8.92316	9.89315	9.48344	8.92316	8.92316	8.92316	8.92316	8.92316	8.92316	chr2	103028275	103035389	-		novel	NM_175094	Pdhx	exonic	541
chr17:84710291-84751354-	2.47647	8.97492	6.07404	0.0513372	0.450865	up	0	0	2	1	0	0	0	0	0	0	8.92316	8.92316	9.89315	9.48344	8.92316	8.92316	8.92316	8.92316	8.92316	8.92316	chr17	84710290	84751354	-		novel	NM_028233	Lrpprc	exonic	1743
chr10:50767091-50823860+	2.47647	8.97492	6.07404	0.0513372	0.450865	up	0	0	2	1	0	0	0	0	0	0	8.92316	8.92316	9.89315	9.48344	8.92316	8.92316	8.92316	8.92316	8.92316	8.92316	chr10	50767090	50823860	+	10_50543666_50486897_-56769|16.53|2|2	PMID:25714049	NM_198007	Ascc3	exonic	472
chr11:52113120-52121981+	2.47647	8.99311	5.5897	0.0513372	0.450865	up	0	0	2	1	0	0	0	0	0	0	8.92316	8.92316	9.89315	9.48344	8.92316	8.92316	8.92316	8.92316	8.92316	8.92316	chr11	52113119	52121981	+	11_51935483_51926622_-8861|10.58|5|7	PMID:25714049	NM_019411	Ppp2ca	sense overlapping	8862
chr12:35100539-35112504+	2.47647	8.99284	5.5966	0.0513372	0.450865	up	0	0	2	1	0	0	0	0	0	0	8.92316	8.92316	9.89315	9.48344	8.92316	8.92316	8.92316	8.92316	8.92316	8.92316	chr12	35100538	35112504	+	12_35797176_35785211_-11965|17.94|1|2	PMID:25714049	NM_001014973	Snx13	exonic	868
chr2:25083852-25084203-	2.47647	8.97492	6.07404	0.0513372	0.450865	up	0	0	2	1	0	0	0	0	0	0	8.92316	8.92316	9.89315	9.48344	8.92316	8.92316	8.92316	8.92316	8.92316	8.92316	chr2	25083851	25084203	-		novel	NM_028093	Entpd8	antisense	352
chr5:124886485-124886654+	2.47647	8.97492	6.07404	0.0513372	0.450865	up	0	0	2	1	0	0	0	0	0	0	8.92316	8.92316	9.89315	9.48344	8.92316	8.92316	8.92316	8.92316	8.92316	8.92316	chr5	124886484	124886654	+		novel	ENSMUST00000141533	Zfp664	intronic	170
chr2:37469377-37502961+	2.47647	8.99173	5.62521	0.0513372	0.450865	up	0	0	2	1	0	0	0	0	0	0	8.92316	8.92316	9.89315	9.48344	8.92316	8.92316	8.92316	8.92316	8.92316	8.92316	chr2	37469376	37502961	+	mmu_circ_0009924	circBase	NM_146121	Rabgap1	exonic	1678
chr5:32640331-32664901+	2.47647	8.97492	6.07404	0.0513372	0.450865	up	0	0	2	1	0	0	0	0	0	0	8.92316	8.92316	9.89315	9.48344	8.92316	8.92316	8.92316	8.92316	8.92316	8.92316	chr5	32640330	32664901	+		novel	NM_009535	Yes1	sense overlapping	24571
chr7:104261502-104262726-	2.47647	8.97492	6.07404	0.0513372	0.450865	up	0	0	2	1	0	0	0	0	0	0	8.92316	8.92316	9.89315	9.48344	8.92316	8.92316	8.92316	8.92316	8.92316	8.92316	chr7	104261501	104262726	-		novel	ENSMUST00000149813	Gm15135	sense overlapping	1225
chr18:20860433-20885257-	2.47647	8.97492	6.07404	0.0513372	0.450865	up	0	0	2	1	0	0	0	0	0	0	8.92316	8.92316	9.89315	9.48344	8.92316	8.92316	8.92316	8.92316	8.92316	8.92316	chr18	20860432	20885257	-	18_21043758_21018934_-24824|19.55|5|6	PMID:25714049	NM_029491	Trappc8	exonic	1439
chr3:84190513-84193372-	2.47647	8.97492	6.07404	0.0513372	0.450865	up	0	0	2	1	0	0	0	0	0	0	8.92316	8.92316	9.89315	9.48344	8.92316	8.92316	8.92316	8.92316	8.92316	8.92316	chr3	84190512	84193372	-	3_83997294_83994435_-2859|22.15|3|3	PMID:25714049	NM_030706	Trim2	exonic	1057
chr4:57606613-57607588+	2.47647	8.97492	6.07404	0.0513372	0.450865	up	0	0	2	1	0	0	0	0	0	0	8.92316	8.92316	9.89315	9.48344	8.92316	8.92316	8.92316	8.92316	8.92316	8.92316	chr4	57606612	57607588	+		novel	ENSMUST00000098066	Gm20459	intronic	976
chr7:92658642-92659243-	2.47647	8.97492	6.07404	0.0513372	0.450865	up	0	0	2	1	0	0	0	0	0	0	8.92316	8.92316	9.89315	9.48344	8.92316	8.92316	8.92316	8.92316	8.92316	8.92316	chr7	92658641	92659243	-		novel	NM_029078	Pcf11	sense overlapping	602
chr1:125405845-125411374-	2.47647	8.97492	6.07404	0.0513372	0.450865	up	0	0	2	1	0	0	0	0	0	0	8.92316	8.92316	9.89315	9.48344	8.92316	8.92316	8.92316	8.92316	8.92316	8.92316	chr1	125405844	125411374	-		novel	NM_023735	Actr3	exonic	459
chr11:79999057-80019784+	2.47647	8.97492	6.07404	0.0513372	0.450865	up	0	0	2	1	0	0	0	0	0	0	8.92316	8.92316	9.89315	9.48344	8.92316	8.92316	8.92316	8.92316	8.92316	8.92316	chr11	79999056	80019784	+		novel	NM_199196	Suz12	exonic	637
chr1:150372029-150375624-	2.47647	8.97492	6.07404	0.0513372	0.450865	up	0	0	2	1	0	0	0	0	0	0	8.92316	8.92316	9.89315	9.48344	8.92316	8.92316	8.92316	8.92316	8.92316	8.92316	chr1	150372028	150375624	-		novel	NM_145511	BC003331	exonic	391
chr3:27417755-27418562-	2.47647	8.97492	6.07404	0.0513372	0.450865	up	0	0	2	1	0	0	0	0	0	0	8.92316	8.92316	9.89315	9.48344	8.92316	8.92316	8.92316	8.92316	8.92316	8.92316	chr3	27417754	27418562	-		novel	NM_173182	Fndc3b	sense overlapping	808
chr12:116357112-116370541+	2.47647	8.97492	6.07404	0.0513372	0.450865	up	0	0	2	1	0	0	0	0	0	0	8.92316	8.92316	9.89315	9.48344	8.92316	8.92316	8.92316	8.92316	8.92316	8.92316	chr12	116357111	116370541	+		novel	NM_028731	Esyt2	sense overlapping	13430
chr1:87364104-87425226+	2.47647	8.97492	6.07404	0.0513372	0.450865	up	0	0	2	1	0	0	0	0	0	0	8.92316	8.92316	9.89315	9.48344	8.92316	8.92316	8.92316	8.92316	8.92316	8.92316	chr1	87364103	87425226	+		novel	NM_146112	Gigyf2	exonic	2332
chr13:67553031-67596775-	2.47647	8.97492	6.07404	0.0513372	0.450865	up	0	0	2	1	0	0	0	0	0	0	8.92316	8.92316	9.89315	9.48344	8.92316	8.92316	8.92316	8.92316	8.92316	8.92316	chr13	67553030	67596775	-		novel	NM_001035231	Zfp748	sense overlapping	43745
chr5:137149616-137153014-	2.47647	8.97492	6.07404	0.0513372	0.450865	up	0	0	2	1	0	0	0	0	0	0	8.92316	8.92316	9.89315	9.48344	8.92316	8.92316	8.92316	8.92316	8.92316	8.92316	chr5	137149615	137153014	-		novel			intergenic	3399
chr4:103059618-103072843-	2.47647	8.99288	5.59553	0.0513372	0.450865	up	0	0	2	1	0	0	0	0	0	0	8.92316	8.92316	9.89315	9.48344	8.92316	8.92316	8.92316	8.92316	8.92316	8.92316	chr4	103059617	103072843	-	4_102745448_102732223_-13225|13.18|13|27	PMID:25714049	NM_146254	Wdr78	exonic	941
chr17:84426139-84441812-	2.47647	8.97492	6.07404	0.0513372	0.450865	up	0	0	2	1	0	0	0	0	0	0	8.92316	8.92316	9.89315	9.48344	8.92316	8.92316	8.92316	8.92316	8.92316	8.92316	chr17	84426138	84441812	-		novel	NM_183021	Thada	exonic	1350
chr2:18170254-18186396+	2.47647	8.97492	6.07404	0.0513372	0.450865	up	0	0	2	1	0	0	0	0	0	0	8.92316	8.92316	9.89315	9.48344	8.92316	8.92316	8.92316	8.92316	8.92316	8.92316	chr2	18170253	18186396	+		novel	NM_010804	Mllt10	exonic	257
chr12:70983319-70993080+	2.47647	8.99173	5.62521	0.0513372	0.450865	up	0	0	2	1	0	0	0	0	0	0	8.92316	8.92316	9.89315	9.48344	8.92316	8.92316	8.92316	8.92316	8.92316	8.92316	chr12	70983318	70993080	+		novel	NM_011184	Psma3	exonic	554
chr18:42535085-42538056+	2.47647	8.97492	6.07404	0.0513372	0.450865	up	0	0	2	1	0	0	0	0	0	0	8.92316	8.92316	9.89315	9.48344	8.92316	8.92316	8.92316	8.92316	8.92316	8.92316	chr18	42535084	42538056	+		novel	NR_110344	Tcerg1	exonic	466
chr13:111756613-111763580-	2.47647	8.98947	5.68336	0.0513372	0.450865	up	0	0	2	1	0	0	0	0	0	0	8.92316	8.92316	9.89315	9.48344	8.92316	8.92316	8.92316	8.92316	8.92316	8.92316	chr13	111756612	111763580	-		novel	NM_011945	Map3k1	exonic	949
chr18:64529389-64531032-	2.47647	8.97492	6.07404	0.0513372	0.450865	up	0	0	2	1	0	0	0	0	0	0	8.92316	8.92316	9.89315	9.48344	8.92316	8.92316	8.92316	8.92316	8.92316	8.92316	chr18	64529388	64531032	-		novel	NM_001001488	Atp8b1	sense overlapping	1644
chr15:76006612-76006925-	2.47647	8.97492	6.07404	0.0513372	0.450865	up	0	0	2	1	0	0	0	0	0	0	8.92316	8.92316	9.89315	9.48344	8.92316	8.92316	8.92316	8.92316	8.92316	8.92316	chr15	76006611	76006925	-		novel	ENSMUST00000060807	Fam83h	intronic	314
chr19:46508698-46510029+	2.47647	8.99203	5.61736	0.0513372	0.450865	up	0	0	2	1	0	0	0	0	0	0	8.92316	8.92316	9.89315	9.48344	8.92316	8.92316	8.92316	8.92316	8.92316	8.92316	chr19	46508697	46510029	+		novel	ENSMUST00000026008	Trim8	intronic	1332
chr15:89177116-89177583-	2.47647	8.97492	6.07404	0.0513372	0.450865	up	0	0	2	1	0	0	0	0	0	0	8.92316	8.92316	9.89315	9.48344	8.92316	8.92316	8.92316	8.92316	8.92316	8.92316	chr15	89177115	89177583	-		novel	NM_138749	Plxnb2	intronic	468
chr13:48921682-48922250-	2.47647	8.97492	6.07404	0.0513372	0.450865	up	0	0	2	1	0	0	0	0	0	0	8.92316	8.92316	9.89315	9.48344	8.92316	8.92316	8.92316	8.92316	8.92316	8.92316	chr13	48921681	48922250	-	13_49017619_49017051_-568|11.51|1|2	PMID:25714049	NM_001033268	Fam120a	exonic	382
chr1:128252203-128275004+	2.47647	8.97492	6.07404	0.0513372	0.450865	up	0	0	2	1	0	0	0	0	0	0	8.92316	8.92316	9.89315	9.48344	8.92316	8.92316	8.92316	8.92316	8.92316	8.92316	chr1	128252202	128275004	+		novel	NM_026390	Ubxn4	exonic	1300
chr12:85898993-85939510+	2.47647	8.99203	5.61736	0.0513372	0.450865	up	0	0	2	1	0	0	0	0	0	0	8.92316	8.92316	9.89315	9.48344	8.92316	8.92316	8.92316	8.92316	8.92316	8.92316	chr12	85898992	85939510	+		novel	NM_001081423	Ttll5	exonic	1935
chr19:5801258-5801898-	2.47628	9.00802	5.26582	0.0513372	0.450865	up	0	0	0	1	2	0	0	0	0	0	8.92316	8.92316	8.92316	9.48344	9.89321	8.92316	8.92316	8.92316	8.92316	8.92316	chr19	5801257	5801898	-	mmu_circ_0007962	circBase	NR_002847	Malat1	sense overlapping	641
chr7:28089802-28090044+	2.47624	9.00722	5.28609	0.0513372	0.450865	up	0	0	2	1	0	0	0	0	0	0	8.92316	8.92316	9.89315	9.48344	8.92316	8.92316	8.92316	8.92316	8.92316	8.92316	chr7	28089801	28090044	+		novel	NM_001122603	Fcgbp	sense overlapping	243
chr10:12433509-12455564-	2.47622	9.00809	5.264	0.0513372	0.450865	up	0	0	2	1	0	0	0	0	0	0	8.92316	8.92316	9.89315	9.48344	8.92316	8.92316	8.92316	8.92316	8.92316	8.92316	chr10	12433508	12455564	-		novel	NM_011682	Utrn	sense overlapping	22056
chr8:22691058-22695257-	2.47583	9.01755	5.1056	0.0513372	0.450865	up	0	0	2	1	0	0	0	0	0	0	8.92316	8.92316	9.89315	9.48344	8.92316	8.92316	8.92316	8.92316	8.92316	8.92316	chr8	22691057	22695257	-		novel	NM_010546	Ikbkb	exonic	283
chr2:119624118-119639734+	2.47574	9.04631	5.18408	0.0513372	0.450865	up	0	0	3	0	0	0	0	0	0	0	8.92316	8.92316	10.209	8.92316	8.92316	8.92316	8.92316	8.92316	8.92316	8.92316	chr2	119624117	119639734	+	2_119465470_119449854_-15616|16.41|2|2	PMID:25714049	NM_133851	Nusap1	exonic	868
chr8:105663754-105666792+	2.475	9.02446	5.20023	0.0513372	0.450865	up	0	0	2	1	0	0	0	0	0	0	8.92316	8.92316	9.89315	9.48344	8.92316	8.92316	8.92316	8.92316	8.92316	8.92316	chr8	105663753	105666792	+	8_108190692_108187654_-3038|13.91|4|4	PMID:25714049	NM_181322	Ctcf	exonic	1095
chr18:34793004-34799359+	2.47493	9.02501	5.20522	0.0513372	0.450865	up	0	0	2	1	0	0	0	0	0	0	8.92316	8.92316	9.89315	9.48344	8.92316	8.92316	8.92316	8.92316	8.92316	8.92316	chr18	34793003	34799359	+	18_34959013_34952658_-6355|13.89|7|11	PMID:25714049	NM_001081256	Kdm3b	exonic	588
chr12:3442474-3476169+	2.4746	9.0278	5.22506	0.0513372	0.450865	up	0	0	2	1	0	0	0	0	0	0	8.92316	8.92316	9.89315	9.48344	8.92316	8.92316	8.92316	8.92316	8.92316	8.92316	chr12	3442473	3476169	+	12_3476169_3442474_-33695|21.45|9|15	PMID:25714049	NM_001270988	Asxl2	exonic	727
chr3:54279863-54302294+	2.4745	9.0292	5.23192	0.0513372	0.450865	up	0	0	0	1	2	0	0	0	0	0	8.92316	8.92316	8.92316	9.48344	9.89321	8.92316	8.92316	8.92316	8.92316	8.92316	chr3	54279862	54302294	+	mmu_circ_0001127	circBase	NM_016984	Trpc4	exonic	845
chr11:23401453-23405953+	2.47424	9.0598	5.11859	0.0513372	0.450865	up	0	0	1	0	2	0	0	0	0	0	8.92316	8.92316	9.48818	8.92316	9.89321	8.92316	8.92316	8.92316	8.92316	8.92316	chr11	23401452	23405953	+	11_23305953_23301453_-4500|15.41|9|14	PMID:25714049	NM_001190401	Usp34	exonic	420
chr17:8182228-8186581+	2.47299	8.97481	6.06878	0.0513372	0.450865	up	0	0	0	2	1	0	0	0	0	0	8.92316	8.92316	8.92316	9.88598	9.48822	8.92316	8.92316	8.92316	8.92316	8.92316	chr17	8182227	8186581	+	mmu_circ_0000724	circBase	NM_201230	Fgfr1op	exonic	409
chrX:112661751-112677451-	2.47299	8.97481	6.06878	0.0513372	0.450865	up	0	0	0	2	1	0	0	0	0	0	8.92316	8.92316	8.92316	9.88598	9.48822	8.92316	8.92316	8.92316	8.92316	8.92316	chrX	112661750	112677451	-		novel	NM_181579	Pof1b	exonic	488
chr4:10889369-10889559+	2.47296	8.97481	6.06873	0.0513372	0.450865	up	0	0	1	2	0	0	0	0	0	0	8.92316	8.92316	9.48818	9.88598	8.92316	8.92316	8.92316	8.92316	8.92316	8.92316	chr4	10889368	10889559	+		novel	ENSMUST00000080517	2610301B20Rik	intronic	191
chr11:80456302-80460713+	2.47296	8.97481	6.06873	0.0513372	0.450865	up	0	0	1	2	0	0	0	0	0	0	8.92316	8.92316	9.48818	9.88598	8.92316	8.92316	8.92316	8.92316	8.92316	8.92316	chr11	80456301	80460713	+		novel	ENSMUST00000172847	Psmd11	intronic	4412
chr13:36892806-36918635-	2.47296	8.97481	6.06873	0.0513372	0.450865	up	0	0	1	2	0	0	0	0	0	0	8.92316	8.92316	9.48818	9.88598	8.92316	8.92316	8.92316	8.92316	8.92316	8.92316	chr13	36892805	36918635	-	13_37010504_36984675_-25829|13.63|3|3	PMID:25714049	NM_028784	F13a1	exonic	796
chr2:91546322-91548967+	2.47296	8.97481	6.06873	0.0513372	0.450865	up	0	0	1	2	0	0	0	0	0	0	8.92316	8.92316	9.48818	9.88598	8.92316	8.92316	8.92316	8.92316	8.92316	8.92316	chr2	91546321	91548967	+		novel	NM_029437	Ckap5	exonic	288
chr17:57295982-57297341+	2.47296	8.97481	6.06873	0.0513372	0.450865	up	0	0	1	2	0	0	0	0	0	0	8.92316	8.92316	9.48818	9.88598	8.92316	8.92316	8.92316	8.92316	8.92316	8.92316	chr17	57295981	57297341	+		novel	NM_011691	Vav1	exonic	450
chr2:92356864-92359209+	2.47296	8.99162	5.62027	0.0513372	0.450865	up	0	0	1	2	0	0	0	0	0	0	8.92316	8.92316	9.48818	9.88598	8.92316	8.92316	8.92316	8.92316	8.92316	8.92316	chr2	92356863	92359209	+	mmu_circ_0001048	circBase	NM_138755	Phf21a	exonic	336
chr11:115587027-115587478-	2.47296	8.97481	6.06873	0.0513372	0.450865	up	0	0	1	2	0	0	0	0	0	0	8.92316	8.92316	9.48818	9.88598	8.92316	8.92316	8.92316	8.92316	8.92316	8.92316	chr11	115587026	115587478	-		novel	NM_173048	Gga3	sense overlapping	452
chr14:26940244-26958511-	2.47296	8.97481	6.06873	0.0513372	0.450865	up	0	0	1	2	0	0	0	0	0	0	8.92316	8.92316	9.48818	9.88598	8.92316	8.92316	8.92316	8.92316	8.92316	8.92316	chr14	26940243	26958511	-		novel	NM_145221	Appl1	exonic	1065
chr11:95766525-95766845+	2.47296	8.97481	6.06873	0.0513372	0.450865	up	0	0	1	2	0	0	0	0	0	0	8.92316	8.92316	9.48818	9.88598	8.92316	8.92316	8.92316	8.92316	8.92316	8.92316	chr11	95766524	95766845	+		novel	ENSMUST00000133070	Zfp652	intronic	321
chrY:90739142-90793417+	2.47296	8.99116	5.63201	0.0513372	0.450865	up	0	0	1	2	0	0	0	0	0	0	8.92316	8.92316	9.48818	9.88598	8.92316	8.92316	8.92316	8.92316	8.92316	8.92316	chrY	90739141	90793417	+		novel	NM_133362	Erdr1	sense overlapping	54276
chr16:96052525-96053982-	2.47296	8.97481	6.06873	0.0513372	0.450865	up	0	0	1	2	0	0	0	0	0	0	8.92316	8.92316	9.48818	9.88598	8.92316	8.92316	8.92316	8.92316	8.92316	8.92316	chr16	96052524	96053982	-		novel	NM_145125	Brwd1	exonic	286
chr9:107893174-107895453+	2.47296	8.97481	6.06873	0.0513372	0.450865	up	0	0	1	2	0	0	0	0	0	0	8.92316	8.92316	9.48818	9.88598	8.92316	8.92316	8.92316	8.92316	8.92316	8.92316	chr9	107893173	107895453	+		novel	ENSMUST00000035202	Mon1a	intronic	2280
chr18:25344864-25420075+	2.47296	8.99171	5.61782	0.0513372	0.450865	up	0	0	1	2	0	0	0	0	0	0	8.92316	8.92316	9.48818	9.88598	8.92316	8.92316	8.92316	8.92316	8.92316	8.92316	chr18	25344863	25420075	+	18_25578576_25503365_-75211|20.81|6|10	PMID:25714049	NM_001033532	AW554918	exonic	390
chrX:130073822-130109381+	2.47296	8.99105	5.63477	0.0513372	0.450865	up	0	0	1	2	0	0	0	0	0	0	8.92316	8.92316	9.48818	9.88598	8.92316	8.92316	8.92316	8.92316	8.92316	8.92316	chrX	130073821	130109381	+	X_126643917_126608358_-35559|18.92|2|2	PMID:25714049	NM_172493	Diap2	exonic	472
chr2:104436997-104446635-	2.47296	8.97481	6.06873	0.0513372	0.450865	up	0	0	1	2	0	0	0	0	0	0	8.92316	8.92316	9.48818	9.88598	8.92316	8.92316	8.92316	8.92316	8.92316	8.92316	chr2	104436996	104446635	-		novel	NM_010434	Hipk3	exonic	797
chr11:29187951-29200803+	2.47296	8.97481	6.06873	0.0513372	0.450865	up	0	0	1	2	0	0	0	0	0	0	8.92316	8.92316	9.48818	9.88598	8.92316	8.92316	8.92316	8.92316	8.92316	8.92316	chr11	29187950	29200803	+		novel	NM_134034	Smek2	exonic	1171
chr2:173688133-173695999+	2.47296	8.97481	6.06873	0.0513372	0.450865	up	0	0	1	2	0	0	0	0	0	0	8.92316	8.92316	9.48818	9.88598	8.92316	8.92316	8.92316	8.92316	8.92316	8.92316	chr2	173688132	173695999	+		novel	NM_024436	Rab22a	sense overlapping	7867
chr11:103858895-103873328-	2.47296	8.97481	6.06873	0.0513372	0.450865	up	0	0	1	2	0	0	0	0	0	0	8.92316	8.92316	9.48818	9.88598	8.92316	8.92316	8.92316	8.92316	8.92316	8.92316	chr11	103858894	103873328	-		novel	NM_008740	Nsf	sense overlapping	14434
chrX:50609770-50609952-	2.47296	8.97481	6.06873	0.0513372	0.450865	up	0	0	1	2	0	0	0	0	0	0	8.92316	8.92316	9.48818	9.88598	8.92316	8.92316	8.92316	8.92316	8.92316	8.92316	chrX	50609769	50609952	-		novel	NR_015505	Firre	intronic	183
chr14:21832884-21838043+	2.47296	8.97481	6.06873	0.0513372	0.450865	up	0	0	1	2	0	0	0	0	0	0	8.92316	8.92316	9.48818	9.88598	8.92316	8.92316	8.92316	8.92316	8.92316	8.92316	chr14	21832883	21838043	+		novel	NM_011695	Vdac2	exonic	325
chr13:63170941-63199550+	2.47296	8.97481	6.06873	0.0513372	0.450865	up	0	0	1	2	0	0	0	0	0	0	8.92316	8.92316	9.48818	9.88598	8.92316	8.92316	8.92316	8.92316	8.92316	8.92316	chr13	63170940	63199550	+		novel	NM_001289924	2010111I01Rik	exonic	362
chr19:32687233-32707009-	2.47296	8.97481	6.06873	0.0513372	0.450865	up	0	0	1	2	0	0	0	0	0	0	8.92316	8.92316	9.48818	9.88598	8.92316	8.92316	8.92316	8.92316	8.92316	8.92316	chr19	32687232	32707009	-	19_32781499_32761723_-19776|21.07|2|3	PMID:25714049	NM_026487	Atad1	exonic	793
chr3:52345039-52347620+	2.47296	8.97481	6.06873	0.0513372	0.450865	up	0	0	1	2	0	0	0	0	0	0	8.92316	8.92316	9.48818	9.88598	8.92316	8.92316	8.92316	8.92316	8.92316	8.92316	chr3	52345038	52347620	+		novel	NM_019739	Foxo1	sense overlapping	2582
chr9:6279799-6337441+	2.47296	8.97481	6.06873	0.0513372	0.450865	up	0	0	1	2	0	0	0	0	0	0	8.92316	8.92316	9.48818	9.88598	8.92316	8.92316	8.92316	8.92316	8.92316	8.92316	chr9	6279798	6337441	+		novel	NM_027924	Pdgfd	sense overlapping	57643
chr4:19522020-19522927-	2.47296	8.97481	6.06873	0.0513372	0.450865	up	0	0	1	2	0	0	0	0	0	0	8.92316	8.92316	9.48818	9.88598	8.92316	8.92316	8.92316	8.92316	8.92316	8.92316	chr4	19522019	19522927	-		novel	NM_027769	Cpne3	sense overlapping	908
chr4:57922038-57922371+	2.47296	8.97481	6.06873	0.0513372	0.450865	up	0	0	1	2	0	0	0	0	0	0	8.92316	8.92316	9.48818	9.88598	8.92316	8.92316	8.92316	8.92316	8.92316	8.92316	chr4	57922037	57922371	+		novel	TCONS_00023028	XLOC_017437	antisense	334
chr11:53368075-53389791+	2.47296	8.97481	6.06873	0.0513372	0.450865	up	0	0	1	2	0	0	0	0	0	0	8.92316	8.92316	9.48818	9.88598	8.92316	8.92316	8.92316	8.92316	8.92316	8.92316	chr11	53368074	53389791	+		novel	NM_033565	Aff4	sense overlapping	21717
chr5:115039966-115061639+	2.47296	8.97481	6.06873	0.0513372	0.450865	up	0	0	1	2	0	0	0	0	0	0	8.92316	8.92316	9.48818	9.88598	8.92316	8.92316	8.92316	8.92316	8.92316	8.92316	chr5	115039965	115061639	+		novel	NM_029012	Sppl3	sense overlapping	21674
chr7:122176384-122176587-	2.47296	8.97481	6.06873	0.0513372	0.450865	up	0	0	1	2	0	0	0	0	0	0	8.92316	8.92316	9.48818	9.88598	8.92316	8.92316	8.92316	8.92316	8.92316	8.92316	chr7	122176383	122176587	-		novel	NM_012016	Ern2	sense overlapping	204
chr17:87678208-87682677+	2.47296	8.97481	6.06873	0.0513372	0.450865	up	0	0	1	2	0	0	0	0	0	0	8.92316	8.92316	9.48818	9.88598	8.92316	8.92316	8.92316	8.92316	8.92316	8.92316	chr17	87678207	87682677	+		novel	NM_008628	Msh2	exonic	581
chr10:39144375-39145713+	2.47296	8.97481	6.06873	0.0513372	0.450865	up	0	0	1	2	0	0	0	0	0	0	8.92316	8.92316	9.48818	9.88598	8.92316	8.92316	8.92316	8.92316	8.92316	8.92316	chr10	39144374	39145713	+		novel	NM_028006	Tube1	exonic	505
chr14:25406150-25409811-	2.47296	8.97481	6.06873	0.0513372	0.450865	up	0	0	1	2	0	0	0	0	0	0	8.92316	8.92316	9.48818	9.88598	8.92316	8.92316	8.92316	8.92316	8.92316	8.92316	chr14	25406149	25409811	-		novel	AK086741		intronic	3662
chr12:28773021-28773372+	2.47296	8.97481	6.06873	0.0513372	0.450865	up	0	0	1	2	0	0	0	0	0	0	8.92316	8.92316	9.48818	9.88598	8.92316	8.92316	8.92316	8.92316	8.92316	8.92316	chr12	28773020	28773372	+		novel	ENSMUST00000035657	Tssc1	intronic	352
chr6:127634977-127636923+	2.47296	8.97481	6.06873	0.0513372	0.450865	up	0	0	1	2	0	0	0	0	0	0	8.92316	8.92316	9.48818	9.88598	8.92316	8.92316	8.92316	8.92316	8.92316	8.92316	chr6	127634976	127636923	+		novel			intergenic	1947
chr6:118751369-118757526-	2.47291	9.07088	5.04456	0.0513372	0.450865	up	0	0	3	0	0	0	0	0	0	0	8.92316	8.92316	10.209	8.92316	8.92316	8.92316	8.92316	8.92316	8.92316	8.92316	chr6	118751368	118757526	-	6_118707544_118701387_-6157|15.48|2|2	PMID:25714049	NM_009781	Cacna1c	exonic	356
chr18:5705043-5748855+	2.47284	9.04371	5.19864	0.0513372	0.450865	up	0	0	2	1	0	0	0	0	0	0	8.92316	8.92316	9.89315	9.48344	8.92316	8.92316	8.92316	8.92316	8.92316	8.92316	chr18	5705042	5748855	+	mmu_circ_0007401	circBase	NM_011546	Zeb1	exonic	363
chr5:137152282-137152546-	2.47282	9.04416	5.19518	0.0513372	0.450865	up	0	0	1	1	1	0	0	0	0	0	8.92316	8.92316	9.48818	9.48344	9.48822	8.92316	8.92316	8.92316	8.92316	8.92316	chr5	137152281	137152546	-		novel			intergenic	265
chr5:134282787-134287043-	2.4728	9.0719	5.03531	0.0513372	0.450865	up	0	0	3	0	0	0	0	0	0	0	8.92316	8.92316	10.209	8.92316	8.92316	8.92316	8.92316	8.92316	8.92316	8.92316	chr5	134282786	134287043	-		novel	NM_010365	Gtf2i	exonic	312
chr2:69948424-69953776+	2.47275	8.99162	5.61967	0.0513372	0.450865	up	0	1	0	0	2	0	0	0	0	0	8.92316	9.47834	8.92316	8.92316	9.89321	8.92316	8.92316	8.92316	8.92316	8.92316	chr2	69948423	69953776	+		novel	NM_177783	Ubr3	exonic	559
chr1:62738289-62749288+	2.47275	8.99316	5.58024	0.0513372	0.450865	up	0	1	0	0	2	0	0	0	0	0	8.92316	9.47834	8.92316	8.92316	9.89321	8.92316	8.92316	8.92316	8.92316	8.92316	chr1	62738288	62749288	+	1_62795862_62784863_-10999|20.30|5|7	PMID:25714049	NM_010939	Nrp2	exonic	895
chr1:165604610-165605822-	2.47275	8.9748	6.06842	0.0513372	0.450865	up	0	1	0	0	2	0	0	0	0	0	8.92316	9.47834	8.92316	8.92316	9.89321	8.92316	8.92316	8.92316	8.92316	8.92316	chr1	165604609	165605822	-	1_167535953_167534741_-1212|19.12|4|4	PMID:25714049	NM_001001880	Mpzl1	exonic	347
chr5:124395895-124400186-	2.47275	8.99192	5.61214	0.0513372	0.450865	up	0	1	0	0	2	0	0	0	0	0	8.92316	9.47834	8.92316	8.92316	9.89321	8.92316	8.92316	8.92316	8.92316	8.92316	chr5	124395894	124400186	-		novel	NM_001081203	Sbno1	exonic	433
chr8:117187381-117191309+	2.47275	8.9748	6.06842	0.0513372	0.450865	up	0	1	0	0	2	0	0	0	0	0	8.92316	9.47834	8.92316	8.92316	9.89321	8.92316	8.92316	8.92316	8.92316	8.92316	chr8	117187380	117191309	+		novel	NM_001081151	Gan	sense overlapping	3929
chr9:100757690-100786696+	2.47273	9.07278	5.03135	0.0513372	0.450865	up	0	0	1	0	2	0	0	0	0	0	8.92316	8.92316	9.48818	8.92316	9.89321	8.92316	8.92316	8.92316	8.92316	8.92316	chr9	100757689	100786696	+	9_100687115_100658109_-29006|20.12|2|2	PMID:25714049	NM_009282	Stag1	exonic	379
chr1:87364104-87436891+	2.47273	9.00812	5.2559	0.0513372	0.450865	up	0	0	1	2	0	0	0	0	0	0	8.92316	8.92316	9.48818	9.88598	8.92316	8.92316	8.92316	8.92316	8.92316	8.92316	chr1	87364103	87436891	+	1_89333466_89260679_-72787|21.51|6|7	PMID:25714049	NM_146112	Gigyf2	exonic	2851
chr17:42815945-42830105-	2.47272	9.07299	5.03037	0.0513372	0.450865	up	0	0	0	0	3	0	0	0	0	0	8.92316	8.92316	8.92316	8.92316	10.2091	8.92316	8.92316	8.92316	8.92316	8.92316	chr17	42815944	42830105	-		novel	NM_009847	Cd2ap	exonic	876
chr2:128729186-128738369+	2.47272	9.00827	5.25214	0.0513372	0.450865	up	0	0	1	2	0	0	0	0	0	0	8.92316	8.92316	9.48818	9.88598	8.92316	8.92316	8.92316	8.92316	8.92316	8.92316	chr2	128729185	128738369	+		novel	NM_008587	Mertk	exonic	684
chr9:31053240-31054313+	2.4727	9.0108	5.18832	0.0513372	0.450865	up	0	0	0	2	1	0	0	0	0	0	8.92316	8.92316	8.92316	9.88598	9.48822	8.92316	8.92316	8.92316	8.92316	8.92316	chr9	31053239	31054313	+	9_30861898_30860825_-1073|15.27|11|24	PMID:25714049	NM_172765	Zbtb44	exonic	1074
chr19:55908423-55919618+	2.4727	9.00946	5.22198	0.0513372	0.450865	up	0	0	1	2	0	0	0	0	0	0	8.92316	8.92316	9.48818	9.88598	8.92316	8.92316	8.92316	8.92316	8.92316	8.92316	chr19	55908422	55919618	+		novel	NM_009333	Tcf7l2	exonic	717
chr5:89132371-89135820+	2.47269	8.9748	6.06833	0.0513372	0.450865	up	0	1	2	0	0	0	0	0	0	0	8.92316	9.47834	9.89315	8.92316	8.92316	8.92316	8.92316	8.92316	8.92316	8.92316	chr5	89132370	89135820	+		novel	NM_018760	Slc4a4	exonic	444
chr16:78325157-78336371+	2.47269	8.9917	5.61744	0.0513372	0.450865	up	0	1	2	0	0	0	0	0	0	0	8.92316	9.47834	9.89315	8.92316	8.92316	8.92316	8.92316	8.92316	8.92316	8.92316	chr16	78325156	78336371	+	16_78336616_78325402_-11214|17.98|5|6	PMID:25714049	NM_009988	Cxadr	exonic	974
chr10:116177718-116188468+	2.47267	9.01106	5.18164	0.0513372	0.450865	up	0	0	1	2	0	0	0	0	0	0	8.92316	8.92316	9.48818	9.88598	8.92316	8.92316	8.92316	8.92316	8.92316	8.92316	chr10	116177717	116188468	+	10_115625524_115614774_-10750|12.71|10|28	PMID:25714049	NM_011217	Ptprr	exonic	380
chr1:38017806-38022314+	2.47266	9.04546	5.18441	0.0513372	0.450865	up	0	0	2	1	0	0	0	0	0	0	8.92316	8.92316	9.89315	9.48344	8.92316	8.92316	8.92316	8.92316	8.92316	8.92316	chr1	38017805	38022314	+	1_38079159_38074651_-4508|15.63|2|4	PMID:25714049	NM_198303	Eif5b	exonic	1250
chr7:84632656-84653042-	2.47254	9.00563	5.31867	0.0513372	0.450865	up	0	1	1	0	1	0	0	0	0	0	8.92316	9.47834	9.48818	8.92316	9.48822	8.92316	8.92316	8.92316	8.92316	8.92316	chr7	84632655	84653042	-	7_91801552_91781166_-20386|12.96|3|3	PMID:25714049	NM_022985	Zfand6	exonic	542
chr1:44126266-44128823+	2.47251	9.074	5.02495	0.0513372	0.450865	up	0	0	3	0	0	0	0	0	0	0	8.92316	8.92316	10.209	8.92316	8.92316	8.92316	8.92316	8.92316	8.92316	8.92316	chr1	44126265	44128823	+	1_44185668_44183111_-2557|22.12|4|5	PMID:25714049	NM_144558	Bivm	exonic	824
chr11:61903907-61922829-	2.47192	9.02162	5.16152	0.0513372	0.450865	up	0	0	1	2	0	0	0	0	0	0	8.92316	8.92316	9.48818	9.88598	8.92316	8.92316	8.92316	8.92316	8.92316	8.92316	chr11	61903906	61922829	-		novel	NM_019921	Akap10	exonic	1097
chr1:170787346-170799745-	2.47183	9.0541	5.12741	0.0513372	0.450865	up	0	0	0	1	2	0	0	0	0	0	8.92316	8.92316	8.92316	9.48344	9.89321	8.92316	8.92316	8.92316	8.92316	8.92316	chr1	170787345	170799745	-	1_172729876_172717477_-12399|17.53|11|16	PMID:25714049	NM_001081304	Atf6	exonic	529
chr13:15478000-15548642+	2.47131	9.05844	5.11679	0.0513372	0.450865	up	0	0	1	1	1	0	0	0	0	0	8.92316	8.92316	9.48818	9.48344	9.48822	8.92316	8.92316	8.92316	8.92316	8.92316	chr13	15477999	15548642	+	13_15640475_15569833_-70642|17.86|2|2	PMID:25714049	NM_008130	Gli3	exonic	408
chrX:56634795-56655053+	2.47129	9.02744	5.21567	0.0513372	0.450865	up	0	0	1	2	0	0	0	0	0	0	8.92316	8.92316	9.48818	9.88598	8.92316	8.92316	8.92316	8.92316	8.92316	8.92316	chrX	56634794	56655053	+		novel	NM_172780	Slc9a6	sense overlapping	20259
chr4:107336114-107341102+	2.47119	9.02595	5.20504	0.0513372	0.450865	up	0	1	2	0	0	0	0	0	0	0	8.92316	9.47834	9.89315	8.92316	8.92316	8.92316	8.92316	8.92316	8.92316	8.92316	chr4	107336113	107341102	+	4_107013707_107008719_-4988|19.28|3|3	PMID:25714049	NM_145550	Yipf1	exonic	286
chr9:66007740-66012854+	2.47112	9.02687	5.21158	0.0513372	0.450865	up	0	1	1	0	1	0	0	0	0	0	8.92316	9.47834	9.48818	8.92316	9.48822	8.92316	8.92316	8.92316	8.92316	8.92316	chr9	66007739	66012854	+	9_65860661_65855547_-5114|20.54|10|18	PMID:25714049	NM_173185	Csnk1g1	exonic	428
chr13:36204509-36207746+	2.47097	9.06136	5.10422	0.0513372	0.450865	up	0	0	2	1	0	0	0	0	0	0	8.92316	8.92316	9.89315	9.48344	8.92316	8.92316	8.92316	8.92316	8.92316	8.92316	chr13	36204508	36207746	+	13_36299615_36296378_-3237|20.60|5|6	PMID:25714049	ENSMUST00000099582	Fars2	intronic	3238
chr4:33320519-33339092+	2.47092	9.06221	5.09996	0.0513372	0.450865	up	0	0	0	1	2	0	0	0	0	0	8.92316	8.92316	8.92316	9.48344	9.89321	8.92316	8.92316	8.92316	8.92316	8.92316	chr4	33320518	33339092	+	4_33426067_33407494_-18573|19.91|16|24	PMID:25714049	NM_011884	Rngtt	exonic	832
chr15:85978602-85979240-	2.47028	9.06782	5.06299	0.0513372	0.450865	up	0	0	2	1	0	0	0	0	0	0	8.92316	8.92316	9.89315	9.48344	8.92316	8.92316	8.92316	8.92316	8.92316	8.92316	chr15	85978601	85979240	-		novel	NM_009886	Celsr1	exonic	639
chr15:27871161-27891472-	2.46984	9.03908	5.21898	0.0513372	0.450865	up	0	1	2	0	0	0	0	0	0	0	8.92316	9.47834	9.89315	8.92316	8.92316	8.92316	8.92316	8.92316	8.92316	8.92316	chr15	27871160	27891472	-	15_27821227_27800916_-20311|13.72|8|16	PMID:25714049	NM_001081302	Trio	exonic	678
chr13:108357394-108368860+	2.4698	9.04213	5.20256	0.0513372	0.450865	up	0	0	1	2	0	0	0	0	0	0	8.92316	8.92316	9.48818	9.88598	8.92316	8.92316	8.92316	8.92316	8.92316	8.92316	chr13	108357393	108368860	+		novel	NM_178683	Depdc1b	exonic	443
chr2:59758465-59772539+	2.46958	9.04241	5.20021	0.0513372	0.450865	up	0	1	0	0	2	0	0	0	0	0	8.92316	9.47834	8.92316	8.92316	9.89321	8.92316	8.92316	8.92316	8.92316	8.92316	chr2	59758464	59772539	+	2_59610596_59596522_-14074|20.04|11|28	PMID:25714049	NM_198294	Tanc1	exonic	423
chr5:137151030-137153006-	2.46957	9.04215	5.20185	0.0513372	0.450865	up	0	1	1	0	1	0	0	0	0	0	8.92316	9.47834	9.48818	8.92316	9.48822	8.92316	8.92316	8.92316	8.92316	8.92316	chr5	137151029	137153006	-		novel			intergenic	1977
chr4:58486477-58487224-	2.46948	9.07538	5.01032	0.0513372	0.450865	up	0	0	0	1	2	0	0	0	0	0	8.92316	8.92316	8.92316	9.48344	9.89321	8.92316	8.92316	8.92316	8.92316	8.92316	chr4	58486476	58487224	-	4_58500096_58499349_-747|17.78|2|2	PMID:25714049	NM_010336	Lpar1	exonic	748
chr11:109934385-109940903-	2.46943	8.9747	6.06341	0.0513372	0.450865	up	0	0	0	3	0	0	0	0	0	0	8.92316	8.92316	8.92316	10.2004	8.92316	8.92316	8.92316	8.92316	8.92316	8.92316	chr11	109934384	109940903	-		novel	NM_013851	Abca8b	sense overlapping	6519
chr8:13482785-13483736-	2.46943	8.9747	6.06341	0.0513372	0.450865	up	0	0	0	3	0	0	0	0	0	0	8.92316	8.92316	8.92316	10.2004	8.92316	8.92316	8.92316	8.92316	8.92316	8.92316	chr8	13482784	13483736	-		novel	NM_019521	Gas6	sense overlapping	952
chr9:82875290-82945918-	2.46943	8.9747	6.06341	0.0513372	0.450865	up	0	0	0	3	0	0	0	0	0	0	8.92316	8.92316	8.92316	10.2004	8.92316	8.92316	8.92316	8.92316	8.92316	8.92316	chr9	82875289	82945918	-		novel	NM_001081216	Phip	exonic	4389
chr5:121348419-121350637+	2.46943	8.9747	6.06341	0.0513372	0.450865	up	0	0	0	3	0	0	0	0	0	0	8.92316	8.92316	8.92316	10.2004	8.92316	8.92316	8.92316	8.92316	8.92316	8.92316	chr5	121348418	121350637	+		novel	NM_181421	Gm15800	exonic	1515
chr5:29264987-29265203-	2.46943	8.9747	6.06341	0.0513372	0.450865	up	0	0	0	3	0	0	0	0	0	0	8.92316	8.92316	8.92316	10.2004	8.92316	8.92316	8.92316	8.92316	8.92316	8.92316	chr5	29264986	29265203	-		novel	ENSMUST00000055195	Lmbr1	intronic	217
chr11:59826290-59828025-	2.46943	8.9747	6.06341	0.0513372	0.450865	up	0	0	0	3	0	0	0	0	0	0	8.92316	8.92316	8.92316	10.2004	8.92316	8.92316	8.92316	8.92316	8.92316	8.92316	chr11	59826289	59828025	-		novel	NM_011991	Cops3	exonic	321
chr5:33026542-33104591+	2.46943	8.9747	6.06341	0.0513372	0.450865	up	0	0	0	3	0	0	0	0	0	0	8.92316	8.92316	8.92316	10.2004	8.92316	8.92316	8.92316	8.92316	8.92316	8.92316	chr5	33026541	33104591	+		novel	NM_011738	Ywhah	sense overlapping	78050
chr19:29579765-29622279+	2.46943	8.9747	6.06341	0.0513372	0.450865	up	0	0	0	3	0	0	0	0	0	0	8.92316	8.92316	8.92316	10.2004	8.92316	8.92316	8.92316	8.92316	8.92316	8.92316	chr19	29579764	29622279	+		novel	NM_001081319	Ric1	sense overlapping	42515
chr11:35785905-35786313+	2.46943	8.9747	6.06341	0.0513372	0.450865	up	0	0	0	3	0	0	0	0	0	0	8.92316	8.92316	8.92316	10.2004	8.92316	8.92316	8.92316	8.92316	8.92316	8.92316	chr11	35785904	35786313	+		novel	NM_145962	Pank3	sense overlapping	409
chr15:34999831-35008298-	2.46943	8.9747	6.06341	0.0513372	0.450865	up	0	0	0	3	0	0	0	0	0	0	8.92316	8.92316	8.92316	10.2004	8.92316	8.92316	8.92316	8.92316	8.92316	8.92316	chr15	34999830	35008298	-	mmu_circ_0005599	circBase	NM_019635	Stk3	exonic	264
chr17:48464784-48465592+	2.46943	8.9747	6.06341	0.0513372	0.450865	up	0	0	0	3	0	0	0	0	0	0	8.92316	8.92316	8.92316	10.2004	8.92316	8.92316	8.92316	8.92316	8.92316	8.92316	chr17	48464783	48465592	+		novel	NM_152823	Unc5cl	sense overlapping	809
chr19:15978957-15981091-	2.46943	8.9747	6.06341	0.0513372	0.450865	up	0	0	0	3	0	0	0	0	0	0	8.92316	8.92316	8.92316	10.2004	8.92316	8.92316	8.92316	8.92316	8.92316	8.92316	chr19	15978956	15981091	-		novel	ENSMUST00000047704	Cep78	intronic	2135
chr17:30135323-30135505+	2.46943	8.99267	5.58569	0.0513372	0.450865	up	0	0	0	3	0	0	0	0	0	0	8.92316	8.92316	8.92316	10.2004	8.92316	8.92316	8.92316	8.92316	8.92316	8.92316	chr17	30135322	30135505	+	17_30272450_30272268_-182|19.14|1|2	PMID:25714049	NM_148926	Zfand3	exonic	183
chr6:37012871-37021265-	2.46943	8.9747	6.06341	0.0513372	0.450865	up	0	0	0	3	0	0	0	0	0	0	8.92316	8.92316	8.92316	10.2004	8.92316	8.92316	8.92316	8.92316	8.92316	8.92316	chr6	37012870	37021265	-	6_36971265_36962871_-8394|17.58|2|2	PMID:25714049	NM_001081206	Dgki	exonic	305
chr19:39069091-39073390+	2.46936	9.04666	5.16636	0.0513372	0.450865	up	0	0	1	2	0	0	0	0	0	0	8.92316	8.92316	9.48818	9.88598	8.92316	8.92316	8.92316	8.92316	8.92316	8.92316	chr19	39069090	39073390	+		novel	NM_028191	Cyp2c65	exonic	651
chr6:119361828-119370408-	2.46935	9.0762	5.00513	0.0513372	0.450865	up	0	0	1	1	1	0	0	0	0	0	8.92316	8.92316	9.48818	9.48344	9.48822	8.92316	8.92316	8.92316	8.92316	8.92316	chr6	119361827	119370408	-	6_119320426_119311846_-8580|20.00|5|7	PMID:25714049	NM_197985	Adipor2	exonic	551
chrX:139700999-139713419+	2.4692	9.00941	5.21593	0.0513372	0.450865	up	0	0	0	3	0	0	0	0	0	0	8.92316	8.92316	8.92316	10.2004	8.92316	8.92316	8.92316	8.92316	8.92316	8.92316	chrX	139700998	139713419	+		novel	NM_001081499	Tbc1d8b	exonic	1070
chr4:11193926-11201416+	2.46918	9.07758	4.99579	0.0513372	0.450865	up	0	0	1	1	1	0	0	0	0	0	8.92316	8.92316	9.48818	9.48344	9.48822	8.92316	8.92316	8.92316	8.92316	8.92316	chr4	11193925	11201416	+	4_11128563_11121073_-7490|14.31|7|7	PMID:25714049	NM_009830	Ccne2	exonic	778
chr10:7701610-7706042+	2.46917	9.01087	5.17918	0.0513372	0.450865	up	0	0	0	3	0	0	0	0	0	0	8.92316	8.92316	8.92316	10.2004	8.92316	8.92316	8.92316	8.92316	8.92316	8.92316	chr10	7701609	7706042	+	10_7425840_7421408_-4432|17.20|2|2	PMID:25714049	NM_010690	Lats1	exonic	2094
chr18:61140791-61141790-	2.46916	9.01134	5.16752	0.0513372	0.450865	up	0	0	0	3	0	0	0	0	0	0	8.92316	8.92316	8.92316	10.2004	8.92316	8.92316	8.92316	8.92316	8.92316	8.92316	chr18	61140790	61141790	-	mmu_circ_0000876	circBase	NM_134134	Hmgxb3	exonic	317
chr3:27488237-27501545-	2.46912	9.04668	5.16561	0.0513372	0.450865	up	0	1	2	0	0	0	0	0	0	0	8.92316	9.47834	9.89315	8.92316	8.92316	8.92316	8.92316	8.92316	8.92316	8.92316	chr3	27488236	27501545	-	3_27400467_27387159_-13308|23.33|12|25	PMID:25714049	NM_173182	Fndc3b	exonic	405
chr17:34917318-34921961+	2.46906	9.0784	4.98982	0.0513372	0.450865	up	0	0	2	1	0	0	0	0	0	0	8.92316	8.92316	9.89315	9.48344	8.92316	8.92316	8.92316	8.92316	8.92316	8.92316	chr17	34917317	34921961	+		novel	NM_023557	Slc44a4	exonic	948
chr3:124386019-124386425+	2.46887	9.05203	5.12652	0.0513372	0.450865	up	0	0	1	2	0	0	0	0	0	0	8.92316	8.92316	9.48818	9.88598	8.92316	8.92316	8.92316	8.92316	8.92316	8.92316	chr3	124386018	124386425	+		novel			intergenic	407
chr14:67839547-67846137-	2.46872	9.08133	4.96641	0.0513372	0.450865	up	0	0	2	1	0	0	0	0	0	0	8.92316	8.92316	9.89315	9.48344	8.92316	8.92316	8.92316	8.92316	8.92316	8.92316	chr14	67839546	67846137	-	14_68464194_68457604_-6590|19.79|2|2	PMID:25714049	NM_177780	Dock5	exonic	525
chr9:114713510-114717922+	2.46868	9.11011	4.69743	0.0513372	0.450865	up	0	0	0	0	3	0	0	0	0	0	8.92316	8.92316	8.92316	8.92316	10.2091	8.92316	8.92316	8.92316	8.92316	8.92316	chr9	114713509	114717922	+	9_114627040_114622628_-4412|19.55|12|30	PMID:25714049	NM_146229	Dync1li1	exonic	402
chr1:63148396-63148571-	2.46839	9.11339	4.67324	0.0513372	0.450865	up	0	0	0	0	3	0	0	0	0	0	8.92316	8.92316	8.92316	8.92316	10.2091	8.92316	8.92316	8.92316	8.92316	8.92316	chr1	63148395	63148571	-	mmu_circ_0000044	circBase	NM_145518	Ndufs1	exonic	176
chr14:64825601-64828668-	2.46807	9.05992	5.10381	0.0513372	0.450865	up	0	0	1	2	0	0	0	0	0	0	8.92316	8.92316	9.48818	9.88598	8.92316	8.92316	8.92316	8.92316	8.92316	8.92316	chr14	64825600	64828668	-	mmu_circ_0000549	circBase	NM_177338	Hmbox1	exonic	271
chr12:100595815-100619641-	2.46736	9.12573	4.5709	0.0513372	0.450865	up	0	0	1	0	2	0	0	0	0	0	8.92316	8.92316	9.48818	8.92316	9.89321	8.92316	8.92316	8.92316	8.92316	8.92316	chr12	100595814	100619641	-	12_101857851_101834025_-23826|18.00|20|137	PMID:25714049	NM_153587	Rps6ka5	exonic	412
chr2:125108956-125116873-	2.46683	9.07272	5.01789	0.0513372	0.450865	up	0	0	1	2	0	0	0	0	0	0	8.92316	8.92316	9.48818	9.88598	8.92316	8.92316	8.92316	8.92316	8.92316	8.92316	chr2	125108955	125116873	-		novel	NM_010852	Myef2	exonic	824
chr8:76908270-76962667+	2.46662	9.0727	5.01749	0.0513372	0.450865	up	0	1	1	0	1	0	0	0	0	0	8.92316	9.47834	9.48818	8.92316	9.48822	8.92316	8.92316	8.92316	8.92316	8.92316	chr8	76908269	76962667	+	8_79486566_79432169_-54397|12.98|3|3	PMID:25714049	NM_001083906	Nr3c2	sense overlapping	54398
chr14:65075584-65080475-	2.46655	9.10371	4.73538	0.0513372	0.450865	up	0	0	1	1	1	0	0	0	0	0	8.92316	8.92316	9.48818	9.48344	9.48822	8.92316	8.92316	8.92316	8.92316	8.92316	chr14	65075583	65080475	-	14_65699312_65694421_-4891|15.52|14|51	PMID:25714049	NM_018788	Extl3	exonic	2702
chr4:108265818-108272383-	2.46637	9.0747	5.00686	0.0513372	0.450865	up	0	1	2	0	0	0	0	0	0	0	8.92316	9.47834	9.89315	8.92316	8.92316	8.92316	8.92316	8.92316	8.92316	8.92316	chr4	108265817	108272383	-	4_107944988_107938423_-6565|11.53|18|25	PMID:25714049	NM_001033634	Zyg11b	exonic	921
chr3:56079859-56091120-	2.46618	9.04678	5.15804	0.0513372	0.450865	up	0	0	0	3	0	0	0	0	0	0	8.92316	8.92316	8.92316	10.2004	8.92316	8.92316	8.92316	8.92316	8.92316	8.92316	chr3	56079858	56091120	-	mmu_circ_0001132	circBase	NM_030595	Nbea	exonic	945
chr15:12889619-12890547+	2.46564	8.97458	6.05767	0.0513372	0.450865	up	0	1	0	2	0	0	0	0	0	0	8.92316	9.47834	8.92316	9.88598	8.92316	8.92316	8.92316	8.92316	8.92316	8.92316	chr15	12889618	12890547	+	15_12820302_12819374_-928|16.04|4|7	PMID:25714049	NM_026799	Drosha	exonic	308
chr5:97036896-97045167+	2.46564	8.97458	6.05767	0.0513372	0.450865	up	0	1	0	2	0	0	0	0	0	0	8.92316	9.47834	8.92316	9.88598	8.92316	8.92316	8.92316	8.92316	8.92316	8.92316	chr5	97036895	97045167	+	mmu_circ_0012885	circBase	NM_080708	Bmp2k	exonic	480
chr5:23446526-23450336+	2.46546	9.00778	5.24938	0.0513372	0.450865	up	0	1	0	2	0	0	0	0	0	0	8.92316	9.47834	8.92316	9.88598	8.92316	8.92316	8.92316	8.92316	8.92316	8.92316	chr5	23446525	23450336	+	5_22956154_22952344_-3810|19.63|3|5	PMID:25714049	ENSMUST00000115128	Kmt2e	exonic	258
chr2:31082974-31097150-	2.46541	9.01059	5.17858	0.0513372	0.450865	up	0	1	0	2	0	0	0	0	0	0	8.92316	9.47834	8.92316	9.88598	8.92316	8.92316	8.92316	8.92316	8.92316	8.92316	chr2	31082973	31097150	-		novel	NM_019406	Fnbp1	exonic	373
chr10:43127779-43160844-	2.4654	8.97457	6.05731	0.0513372	0.450865	up	0	2	0	0	1	0	0	0	0	0	8.92316	9.87826	8.92316	8.92316	9.48822	8.92316	8.92316	8.92316	8.92316	8.92316	chr10	43127778	43160844	-	10_42880650_42847585_-33065|18.57|16|162	PMID:25714049	NM_175407	Sobp	exonic	477
chr8:117426529-117429793+	2.4654	8.97457	6.05731	0.0513372	0.450865	up	0	2	0	0	1	0	0	0	0	0	8.92316	9.87826	8.92316	8.92316	9.48822	8.92316	8.92316	8.92316	8.92316	8.92316	chr8	117426528	117429793	+		novel	NM_028941	Cmip	sense overlapping	3265
chr1:40276098-40277331+	2.4654	8.97457	6.05731	0.0513372	0.450865	up	0	2	0	0	1	0	0	0	0	0	8.92316	9.87826	8.92316	8.92316	9.48822	8.92316	8.92316	8.92316	8.92316	8.92316	chr1	40276097	40277331	+		novel	ENSMUST00000027241	Il1r1	intronic	1234
chr7:79909835-79915258-	2.4654	8.97457	6.05731	0.0513372	0.450865	up	0	2	0	0	1	0	0	0	0	0	8.92316	9.87826	8.92316	8.92316	9.48822	8.92316	8.92316	8.92316	8.92316	8.92316	chr7	79909834	79915258	-		novel	NM_009682	Ap3s2	exonic	184
chr2:69948424-69988896+	2.4654	8.97457	6.05731	0.0513372	0.450865	up	0	2	0	0	1	0	0	0	0	0	8.92316	9.87826	8.92316	8.92316	9.48822	8.92316	8.92316	8.92316	8.92316	8.92316	chr2	69948423	69988896	+		novel	NM_177783	Ubr3	exonic	2250
chr14:79501254-79509500+	2.4654	8.97457	6.05731	0.0513372	0.450865	up	0	2	0	0	1	0	0	0	0	0	8.92316	9.87826	8.92316	8.92316	9.48822	8.92316	8.92316	8.92316	8.92316	8.92316	chr14	79501253	79509500	+		novel	ENSMUST00000040131	Elf1	intronic	8247
chr8:68645799-68719494-	2.4654	8.99148	5.6072	0.0513372	0.450865	up	0	2	0	0	1	0	0	0	0	0	8.92316	9.87826	8.92316	8.92316	9.48822	8.92316	8.92316	8.92316	8.92316	8.92316	chr8	68645798	68719494	-	8_71243393_71169698_-73695|14.86|6|7	PMID:25714049	uc029wtm.1	Csgalnact1	exonic	778
chr10:85899175-85905498-	2.4654	8.97457	6.05731	0.0513372	0.450865	up	0	2	0	0	1	0	0	0	0	0	8.92316	9.87826	8.92316	8.92316	9.48822	8.92316	8.92316	8.92316	8.92316	8.92316	chr10	85899174	85905498	-		novel	NM_181650	Prdm4	exonic	988
chr5:25285067-25287125-	2.4654	8.99281	5.57322	0.0513372	0.450865	up	0	2	0	0	1	0	0	0	0	0	8.92316	9.87826	8.92316	8.92316	9.48822	8.92316	8.92316	8.92316	8.92316	8.92316	chr5	25285066	25287125	-		novel	AK134078		intronic	2059
chr4:130174212-130174725-	2.4654	8.97457	6.05731	0.0513372	0.450865	up	0	2	0	0	1	0	0	0	0	0	8.92316	9.87826	8.92316	8.92316	9.48822	8.92316	8.92316	8.92316	8.92316	8.92316	chr4	130174211	130174725	-		novel	ENSMUST00000105998	Tinagl1	intronic	514
chr10:93240368-93240689+	2.4654	8.97457	6.05731	0.0513372	0.450865	up	0	2	0	0	1	0	0	0	0	0	8.92316	9.87826	8.92316	8.92316	9.48822	8.92316	8.92316	8.92316	8.92316	8.92316	chr10	93240367	93240689	+		novel	uc007gum.1	Cdk17	intronic	322
chr14:21234833-21318183+	2.4654	8.99281	5.57322	0.0513372	0.450865	up	0	2	0	0	1	0	0	0	0	0	8.92316	9.87826	8.92316	8.92316	9.48822	8.92316	8.92316	8.92316	8.92316	8.92316	chr14	21234832	21318183	+	14_22137405_22054055_-83350|19.17|4|6	PMID:25714049	NM_134079	Adk	exonic	453
chr15:31480285-31485080-	2.4654	8.97457	6.05731	0.0513372	0.450865	up	0	2	0	0	1	0	0	0	0	0	8.92316	9.87826	8.92316	8.92316	9.48822	8.92316	8.92316	8.92316	8.92316	8.92316	chr15	31480284	31485080	-		novel	NM_172606	March6	exonic	494
chr10:89652943-89662465-	2.4654	8.99104	5.6184	0.0513372	0.450865	up	0	2	0	0	1	0	0	0	0	0	8.92316	9.87826	8.92316	8.92316	9.48822	8.92316	8.92316	8.92316	8.92316	8.92316	chr10	89652942	89662465	-		novel	NM_198021	Scyl2	exonic	1029
chr19:57691767-57755618+	2.4654	8.99293	5.56997	0.0513372	0.450865	up	0	2	0	0	1	0	0	0	0	0	8.92316	9.87826	8.92316	8.92316	9.48822	8.92316	8.92316	8.92316	8.92316	8.92316	chr19	57691766	57755618	+	19_57830108_57766257_-63851|16.52|9|15	PMID:25714049	NM_181415	Atrnl1	exonic	1554
chr17:87120751-87121346+	2.4654	8.97457	6.05731	0.0513372	0.450865	up	0	2	0	0	1	0	0	0	0	0	8.92316	9.87826	8.92316	8.92316	9.48822	8.92316	8.92316	8.92316	8.92316	8.92316	chr17	87120750	87121346	+		novel	uc008duq.2	Socs5	intronic	596
chr7:110447014-110464707-	2.4654	8.97457	6.05731	0.0513372	0.450865	up	0	2	0	0	1	0	0	0	0	0	8.92316	9.87826	8.92316	8.92316	9.48822	8.92316	8.92316	8.92316	8.92316	8.92316	chr7	110447013	110464707	-	7_117608221_117590528_-17693|16.94|4|4	PMID:25714049	NM_177324	Sbf2	exonic	693
chr11:102487500-102508211-	2.4654	8.99082	5.62412	0.0513372	0.450865	up	0	2	0	0	1	0	0	0	0	0	8.92316	9.87826	8.92316	8.92316	9.48822	8.92316	8.92316	8.92316	8.92316	8.92316	chr11	102487499	102508211	-	11_102369525_102348814_-20711|16.85|4|5	PMID:25714049	NM_001159492	Gpatch8	exonic	430
chr14:55640385-55641588-	2.4654	8.97457	6.05731	0.0513372	0.450865	up	0	2	0	0	1	0	0	0	0	0	8.92316	9.87826	8.92316	8.92316	9.48822	8.92316	8.92316	8.92316	8.92316	8.92316	chr14	55640384	55641588	-	14_56260425_56259222_-1203|18.07|2|2	PMID:25714049	NM_028780	Tm9sf1	exonic	808
chr9:58229355-58234933-	2.4654	8.97457	6.05731	0.0513372	0.450865	up	0	2	0	0	1	0	0	0	0	0	8.92316	9.87826	8.92316	8.92316	9.48822	8.92316	8.92316	8.92316	8.92316	8.92316	chr9	58229354	58234933	-	9_58082740_58077162_-5578|18.52|2|3	PMID:25714049	NM_008884	Pml	exonic	988
chr11:106096991-106142558+	2.4654	8.97457	6.05731	0.0513372	0.450865	up	0	2	0	0	1	0	0	0	0	0	8.92316	9.87826	8.92316	8.92316	9.48822	8.92316	8.92316	8.92316	8.92316	8.92316	chr11	106096990	106142558	+		novel	NM_011947	Map3k3	exonic	632
chr11:80368062-80368592-	2.4654	8.97457	6.05731	0.0513372	0.450865	up	0	2	0	0	1	0	0	0	0	0	8.92316	9.87826	8.92316	8.92316	9.48822	8.92316	8.92316	8.92316	8.92316	8.92316	chr11	80368061	80368592	-	11_80182094_80181564_-530|22.82|4|5	PMID:25714049	NM_027472	5730455P16Rik	exonic	202
chr7:131039343-131039601+	2.4654	8.99304	5.56729	0.0513372	0.450865	up	0	2	0	0	1	0	0	0	0	0	8.92316	9.87826	8.92316	8.92316	9.48822	8.92316	8.92316	8.92316	8.92316	8.92316	chr7	131039342	131039601	+		novel	uc009kax.1	Dmbt1	intronic	259
chr5:118751531-118754421+	2.4654	8.97457	6.05731	0.0513372	0.450865	up	0	2	0	0	1	0	0	0	0	0	8.92316	9.87826	8.92316	8.92316	9.48822	8.92316	8.92316	8.92316	8.92316	8.92316	chr5	118751530	118754421	+		novel	NM_172424	Med13l	exonic	526
chr3:96873460-96893604-	2.4654	8.97457	6.05731	0.0513372	0.450865	up	0	2	0	0	1	0	0	0	0	0	8.92316	9.87826	8.92316	8.92316	9.48822	8.92316	8.92316	8.92316	8.92316	8.92316	chr3	96873459	96893604	-	3_96697527_96677383_-20144|18.90|4|4	PMID:25714049	NM_026229	Gpr89	exonic	889
chr11:107685291-107686862+	2.4654	8.97457	6.05731	0.0513372	0.450865	up	0	2	0	0	1	0	0	0	0	0	8.92316	9.87826	8.92316	8.92316	9.48822	8.92316	8.92316	8.92316	8.92316	8.92316	chr11	107685290	107686862	+		novel	NM_198298	Helz	sense overlapping	1572
chr8:120084844-120085441-	2.4654	8.97457	6.05731	0.0513372	0.450865	up	0	2	0	0	1	0	0	0	0	0	8.92316	9.87826	8.92316	8.92316	9.48822	8.92316	8.92316	8.92316	8.92316	8.92316	chr8	120084843	120085441	-	8_122609341_122608744_-597|15.33|6|9	PMID:25714049	NM_133967	Zdhhc7	exonic	179
chr18:39286527-39306852+	2.4654	8.99281	5.57322	0.0513372	0.450865	up	0	2	0	0	1	0	0	0	0	0	8.92316	9.87826	8.92316	8.92316	9.48822	8.92316	8.92316	8.92316	8.92316	8.92316	chr18	39286526	39306852	+	18_39466506_39446181_-20325|19.29|4|5	PMID:25714049	NM_175164	Arhgap26	exonic	450
chr12:101044490-101058941-	2.4654	8.97457	6.05731	0.0513372	0.450865	up	0	2	0	0	1	0	0	0	0	0	8.92316	9.87826	8.92316	8.92316	9.48822	8.92316	8.92316	8.92316	8.92316	8.92316	chr12	101044489	101058941	-		novel	NM_211355	Smek1	exonic	1494
chr3:122835553-122843108+	2.46537	8.97457	6.05727	0.0513372	0.450865	up	0	2	1	0	0	0	0	0	0	0	8.92316	9.87826	9.48818	8.92316	8.92316	8.92316	8.92316	8.92316	8.92316	8.92316	chr3	122835552	122843108	+		novel	NM_153422	Pde5a	exonic	331
chr13:74720932-74735331-	2.46537	8.97457	6.05727	0.0513372	0.450865	up	0	2	1	0	0	0	0	0	0	0	8.92316	9.87826	9.48818	8.92316	8.92316	8.92316	8.92316	8.92316	8.92316	8.92316	chr13	74720931	74735331	-		novel	NM_009817	Cast	exonic	729
chr1:151401080-151403896-	2.4652	9.00938	5.20834	0.0513372	0.450865	up	0	2	0	0	1	0	0	0	0	0	8.92316	9.87826	8.92316	8.92316	9.48822	8.92316	8.92316	8.92316	8.92316	8.92316	chr1	151401079	151403896	-	1_153251026_153248210_-2816|16.51|3|3	PMID:25714049	NM_025819	Swt1	exonic	385
chr15:98592127-98599016-	2.46519	9.00954	5.20434	0.0513372	0.450865	up	0	2	0	0	1	0	0	0	0	0	8.92316	9.87826	8.92316	8.92316	9.48822	8.92316	8.92316	8.92316	8.92316	8.92316	chr15	98592126	98599016	-		novel	NM_007405	Adcy6	sense overlapping	6890
chr6:71505734-71510220+	2.46505	9.08936	4.88044	0.0513372	0.450865	up	0	0	1	2	0	0	0	0	0	0	8.92316	8.92316	9.48818	9.88598	8.92316	8.92316	8.92316	8.92316	8.92316	8.92316	chr6	71505733	71510220	+	6_71460214_71455728_-4486|14.81|14|31	PMID:25714049	NM_009543	Rnf103	sense overlapping	4487
chr7:116387844-116394358-	2.46462	9.09164	4.85192	0.0513372	0.450865	up	0	1	2	0	0	0	0	0	0	0	8.92316	9.47834	9.89315	8.92316	8.92316	8.92316	8.92316	8.92316	8.92316	8.92316	chr7	116387843	116394358	-	7_123537872_123531358_-6514|18.29|15|41	PMID:25714049	NM_011083	Pik3c2a	exonic	535
chr2:24856606-24877626-	2.4646	9.0948	4.80824	0.0513372	0.450865	up	0	0	0	2	1	0	0	0	0	0	8.92316	8.92316	8.92316	9.88598	9.48822	8.92316	8.92316	8.92316	8.92316	8.92316	chr2	24856605	24877626	-	2_24733146_24712126_-21020|15.05|19|58	PMID:25714049	NM_172545	Ehmt1	exonic	697
chr1:60518980-60527489-	2.46434	9.02435	5.17625	0.0513372	0.450865	up	0	2	0	0	1	0	0	0	0	0	8.92316	9.87826	8.92316	8.92316	9.48822	8.92316	8.92316	8.92316	8.92316	8.92316	chr1	60518979	60527489	-	1_60584333_60575824_-8509|12.89|17|27	PMID:25714049	ENSMUST00000027168	Raph1	exonic	696
chr11:90671084-90674819-	2.46431	9.02465	5.17904	0.0513372	0.450865	up	0	2	0	0	1	0	0	0	0	0	8.92316	9.87826	8.92316	8.92316	9.48822	8.92316	8.92316	8.92316	8.92316	8.92316	chr11	90671083	90674819	-	11_90536133_90532398_-3735|15.89|4|5	PMID:25714049	NM_028011	Tom1l1	exonic	495
chr7:98979636-99004706-	2.4643	9.02742	5.20026	0.0513372	0.450865	up	0	1	0	2	0	0	0	0	0	0	8.92316	9.47834	8.92316	9.88598	8.92316	8.92316	8.92316	8.92316	8.92316	8.92316	chr7	98979635	99004706	-	7_106153216_106128146_-25070|16.21|17|47	PMID:25714049	NM_178635	Uvrag	exonic	527
chr4:148480865-148491766+	2.46424	9.02547	5.18604	0.0513372	0.450865	up	0	2	0	0	1	0	0	0	0	0	8.92316	9.87826	8.92316	8.92316	9.48822	8.92316	8.92316	8.92316	8.92316	8.92316	chr4	148480864	148491766	+	4_147865875_147854974_-10901|20.63|4|4	PMID:25714049	NM_020009	Mtor	exonic	1223
chr9:103334056-103336166+	2.4642	9.0692	5.03818	0.0513372	0.450865	up	0	0	0	3	0	0	0	0	0	0	8.92316	8.92316	8.92316	10.2004	8.92316	8.92316	8.92316	8.92316	8.92316	8.92316	chr9	103334055	103336166	+	9_103238496_103236386_-2110|18.93|13|14	PMID:25714049	NM_176979	Topbp1	exonic	374
chr1:132991700-132992225-	2.46384	9.10411	4.72669	0.0513372	0.450865	up	0	0	1	2	0	0	0	0	0	0	8.92316	8.92316	9.48818	9.88598	8.92316	8.92316	8.92316	8.92316	8.92316	8.92316	chr1	132991699	132992225	-		novel	NM_008575	Mdm4	sense overlapping	526
chr9:99105531-99122376-	2.46371	9.03185	5.21571	0.0513372	0.450865	up	0	2	0	0	1	0	0	0	0	0	8.92316	9.87826	8.92316	8.92316	9.48822	8.92316	8.92316	8.92316	8.92316	8.92316	chr9	99105530	99122376	-		novel	NM_029094	Pik3cb	exonic	280
chr3:90350387-90355785+	2.46345	9.10931	4.69112	0.0513372	0.450865	up	0	0	1	2	0	0	0	0	0	0	8.92316	8.92316	9.48818	9.88598	8.92316	8.92316	8.92316	8.92316	8.92316	8.92316	chr3	90350386	90355785	+	3_90159707_90154309_-5398|20.88|3|3	PMID:25714049	NM_139304	Gatad2b	exonic	933
chr19:53960973-53988383+	2.46312	9.03915	5.20346	0.0513372	0.450865	up	0	2	0	0	1	0	0	0	0	0	8.92316	9.87826	8.92316	8.92316	9.48822	8.92316	8.92316	8.92316	8.92316	8.92316	chr19	53960972	53988383	+		novel	NM_019658	Shoc2	sense overlapping	27411
chr9:14592754-14596600-	2.46306	9.1123	4.66915	0.0513372	0.450865	up	0	1	0	0	2	0	0	0	0	0	8.92316	9.47834	8.92316	8.92316	9.89321	8.92316	8.92316	8.92316	8.92316	8.92316	chr9	14592753	14596600	-	9_14401044_14397198_-3846|16.67|9|17	PMID:25714049	NM_001081395	Amotl1	exonic	1108
chr17:78313124-78335355+	2.46289	9.04171	5.18941	0.0513372	0.450865	up	0	2	1	0	0	0	0	0	0	0	8.92316	9.87826	9.48818	8.92316	8.92316	8.92316	8.92316	8.92316	8.92316	8.92316	chr17	78313123	78335355	+	17_78734695_78712464_-22231|19.30|8|13	PMID:25714049	NM_015800	Crim1	exonic	510
chr14:118117737-118121861-	2.46275	9.0435	5.17716	0.0513372	0.450865	up	0	2	1	0	0	0	0	0	0	0	8.92316	9.87826	9.48818	8.92316	8.92316	8.92316	8.92316	8.92316	8.92316	8.92316	chr14	118117736	118121861	-		novel	NM_029578	Tgds	exonic	302
chr7:72224021-72229470-	2.46251	9.11979	4.61022	0.0513372	0.450865	up	0	1	1	0	1	0	0	0	0	0	8.92316	9.47834	9.48818	8.92316	9.48822	8.92316	8.92316	8.92316	8.92316	8.92316	chr7	72224020	72229470	-		novel	NM_001024703	Mctp2	exonic	368
chr1:139053346-139090555+	2.4621	9.16983	4.22495	0.0513372	0.450865	up	0	0	0	1	2	0	0	0	0	0	8.92316	8.92316	8.92316	9.48344	9.89321	8.92316	8.92316	8.92316	8.92316	8.92316	chr1	139053345	139090555	+	1_140987132_140949923_-37209|18.56|6|7	PMID:25714049	NM_181347	Dennd1b	exonic	565
chr2:22946576-22962501-	2.46184	9.17413	4.19597	0.0513372	0.450865	up	0	0	2	1	0	0	0	0	0	0	8.92316	8.92316	9.89315	9.48344	8.92316	8.92316	8.92316	8.92316	8.92316	8.92316	chr2	22946575	22962501	-		novel	NM_007380	Abi1	exonic	790
chr11:95904922-95906486-	2.46183	8.99129	5.60412	0.0513372	0.450865	up	0	2	0	1	0	0	0	0	0	0	8.92316	9.87826	8.92316	9.48344	8.92316	8.92316	8.92316	8.92316	8.92316	8.92316	chr11	95904921	95906486	-		novel	ENSMUST00000038343	B4galnt2	intronic	1565
chr8:85940841-86029684+	2.46183	8.97446	6.05191	0.0513372	0.450865	up	0	2	0	1	0	0	0	0	0	0	8.92316	9.87826	8.92316	9.48344	8.92316	8.92316	8.92316	8.92316	8.92316	8.92316	chr8	85940840	86029684	+		novel	NM_199446	Phkb	exonic	1856
chr9:122258917-122263789-	2.46183	8.97446	6.05191	0.0513372	0.450865	up	0	2	0	1	0	0	0	0	0	0	8.92316	9.87826	8.92316	9.48344	8.92316	8.92316	8.92316	8.92316	8.92316	8.92316	chr9	122258916	122263789	-	9_122172907_122168035_-4872|19.97|3|3	PMID:25714049	NM_133979	Ano10	exonic	821
chr17:35013265-35013747+	2.46167	9.00816	5.23186	0.0513372	0.450865	up	0	2	0	1	0	0	0	0	0	0	8.92316	9.87826	8.92316	9.48344	8.92316	8.92316	8.92316	8.92316	8.92316	8.92316	chr17	35013264	35013747	+	17_35150692_35150210_-482|16.21|18|60	PMID:25714049	NM_011690	Vars	exonic	231
chr8:22535019-22540445+	2.46165	9.0094	5.20063	0.0513372	0.450865	up	0	2	0	1	0	0	0	0	0	0	8.92316	9.87826	8.92316	9.48344	8.92316	8.92316	8.92316	8.92316	8.92316	8.92316	chr8	22535018	22540445	+	8_23650917_23645491_-5426|20.96|14|30	PMID:25714049	NM_011394	Slc20a2	exonic	781
chr2:153187263-153204624+	2.4615	9.13867	4.43821	0.0513372	0.450865	up	0	0	1	2	0	0	0	0	0	0	8.92316	8.92316	9.48818	9.88598	8.92316	8.92316	8.92316	8.92316	8.92316	8.92316	chr2	153187262	153204624	+	2_153030360_153012999_-17361|15.06|4|5	PMID:25714049	NM_133847	Tm9sf4	exonic	1553
chr14:36896255-36909212-	2.46142	9.22325	3.93625	0.0513372	0.450865	up	0	0	3	0	0	0	0	0	0	0	8.92316	8.92316	10.209	8.92316	8.92316	8.92316	8.92316	8.92316	8.92316	8.92316	chr14	36896254	36909212	-		novel	NM_027045	Ccser2	exonic	457
chr3:116681105-116694634-	2.46126	9.18545	4.11769	0.0513372	0.450865	up	0	0	2	1	0	0	0	0	0	0	8.92316	8.92316	9.89315	9.48344	8.92316	8.92316	8.92316	8.92316	8.92316	8.92316	chr3	116681104	116694634	-		novel	NM_144902	Slc35a3	exonic	655
chr11:62283597-62292218+	2.46068	9.07324	5.00115	0.0513372	0.450865	up	0	1	0	2	0	0	0	0	0	0	8.92316	9.47834	8.92316	9.88598	8.92316	8.92316	8.92316	8.92316	8.92316	8.92316	chr11	62283596	62292218	+	11_62105720_62097099_-8621|20.49|19|245	PMID:25714049	NM_028360	Ttc19	exonic	364
chr9:100776756-100803354+	2.45966	9.17275	4.20065	0.0513372	0.450865	up	0	0	0	2	1	0	0	0	0	0	8.92316	8.92316	8.92316	9.88598	9.48822	8.92316	8.92316	8.92316	8.92316	8.92316	chr9	100776755	100803354	+	9_100703773_100677175_-26598|21.51|20|102	PMID:25714049	NM_009282	Stag1	exonic	508
chr5:20919525-20920162-	2.45905	9.22914	3.90691	0.0513372	0.450865	up	0	0	2	1	0	0	0	0	0	0	8.92316	8.92316	9.89315	9.48344	8.92316	8.92316	8.92316	8.92316	8.92316	8.92316	chr5	20919524	20920162	-	5_20425980_20425343_-637|21.34|18|185	PMID:25714049	NM_001080977	Rsbn1l	exonic	638
chr19:40230507-40252061-	2.45899	9.13625	4.45596	0.0513372	0.450865	up	0	1	1	1	0	0	0	0	0	0	8.92316	9.47834	9.48818	9.48344	8.92316	8.92316	8.92316	8.92316	8.92316	8.92316	chr19	40230506	40252061	-		novel	NM_016861	Pdlim1	exonic	583
chr4:137604523-137606816+	2.45898	9.14016	4.41816	0.0513372	0.450865	up	0	0	0	3	0	0	0	0	0	0	8.92316	8.92316	8.92316	10.2004	8.92316	8.92316	8.92316	8.92316	8.92316	8.92316	chr4	137604522	137606816	+	4_137162731_137160438_-2293|20.33|3|4	PMID:25714049	NM_130879	Usp48	exonic	406
chr10:128578100-128579092-	2.45888	9.13819	4.4371	0.0513372	0.450865	up	0	1	1	1	0	0	0	0	0	0	8.92316	9.47834	9.48818	9.48344	8.92316	8.92316	8.92316	8.92316	8.92316	8.92316	chr10	128578099	128579092	-	10_128016148_128015156_-992|15.54|2|2	PMID:25714049	NM_010153	Erbb3	exonic	430
chr14:122971740-122973285-	2.45845	9.19728	4.04404	0.0513372	0.450865	up	0	0	1	2	0	0	0	0	0	0	8.92316	8.92316	9.48818	9.88598	8.92316	8.92316	8.92316	8.92316	8.92316	8.92316	chr14	122971739	122973285	-	14_123372507_123370962_-1545|19.77|11|30	PMID:25714049	NM_028651	Tmtc4	exonic	333
chr14:20520554-20531860-	2.45839	9.0605	5.07897	0.0513372	0.450865	up	0	2	0	1	0	0	0	0	0	0	8.92316	9.87826	8.92316	9.48344	8.92316	8.92316	8.92316	8.92316	8.92316	8.92316	chr14	20520553	20531860	-	14_21351082_21339776_-11306|11.13|11|18	PMID:25714049	NM_008914	Ppp3cb	exonic	1023
chr6:18277808-18299934+	2.45802	8.97434	6.04613	0.0513372	0.450865	up	0	3	0	0	0	0	0	0	0	0	8.92316	10.191	8.92316	8.92316	8.92316	8.92316	8.92316	8.92316	8.92316	8.92316	chr6	18277807	18299934	+		novel	NM_021050	Cftr	exonic	812
chr11:119416447-119430749+	2.45802	8.97434	6.04613	0.0513372	0.450865	up	0	3	0	0	0	0	0	0	0	0	8.92316	10.191	8.92316	8.92316	8.92316	8.92316	8.92316	8.92316	8.92316	8.92316	chr11	119416446	119430749	+		novel	ENSMUST00000093902	Rnf213	exonic	2101
chr3:127583584-127602557+	2.45802	8.97434	6.04613	0.0513372	0.450865	up	0	3	0	0	0	0	0	0	0	0	8.92316	10.191	8.92316	8.92316	8.92316	8.92316	8.92316	8.92316	8.92316	8.92316	chr3	127583583	127602557	+		novel	NM_197997	Zgrf1	exonic	1927
chr5:64979708-65034444+	2.45802	8.97434	6.04613	0.0513372	0.450865	up	0	3	0	0	0	0	0	0	0	0	8.92316	10.191	8.92316	8.92316	8.92316	8.92316	8.92316	8.92316	8.92316	8.92316	chr5	64979707	65034444	+		novel	NM_026667	Fam114a1	exonic	1547
chr1:106000931-106032235+	2.45802	8.99273	5.55899	0.0513372	0.450865	up	0	3	0	0	0	0	0	0	0	0	8.92316	10.191	8.92316	8.92316	8.92316	8.92316	8.92316	8.92316	8.92316	8.92316	chr1	106000930	106032235	+	1_107928812_107897508_-31304|17.70|1|2	PMID:25714049	NM_001122675	Zcchc2	sense overlapping	31305
chr7:19250083-19250756-	2.45802	8.97434	6.04613	0.0513372	0.450865	up	0	3	0	0	0	0	0	0	0	0	8.92316	10.191	8.92316	8.92316	8.92316	8.92316	8.92316	8.92316	8.92316	8.92316	chr7	19250082	19250756	-		novel	ENSMUST00000161711	Opa3	antisense	674
chr13:4593124-4602797-	2.45802	8.97434	6.04613	0.0513372	0.450865	up	0	3	0	0	0	0	0	0	0	0	8.92316	10.191	8.92316	8.92316	8.92316	8.92316	8.92316	8.92316	8.92316	8.92316	chr13	4593123	4602797	-		novel	NM_018859	Akr1e1	sense overlapping	9674
chr7:130504694-130507576-	2.45802	8.97434	6.04613	0.0513372	0.450865	up	0	3	0	0	0	0	0	0	0	0	8.92316	10.191	8.92316	8.92316	8.92316	8.92316	8.92316	8.92316	8.92316	8.92316	chr7	130504693	130507576	-		novel	ENSMUST00000124096	Fgfr2	intronic	2883
chr11:54668614-54676415+	2.45802	8.97434	6.04613	0.0513372	0.450865	up	0	3	0	0	0	0	0	0	0	0	8.92316	10.191	8.92316	8.92316	8.92316	8.92316	8.92316	8.92316	8.92316	8.92316	chr11	54668613	54676415	+		novel	NM_175258	Rapgef6	exonic	345
chr2:155202207-155210120+	2.45802	8.97434	6.04613	0.0513372	0.450865	up	0	3	0	0	0	0	0	0	0	0	8.92316	10.191	8.92316	8.92316	8.92316	8.92316	8.92316	8.92316	8.92316	8.92316	chr2	155202206	155210120	+		novel	NM_008395	Itch	exonic	528
chr15:86311727-86366680+	2.45802	8.99277	5.55812	0.0513372	0.450865	up	0	3	0	0	0	0	0	0	0	0	8.92316	10.191	8.92316	8.92316	8.92316	8.92316	8.92316	8.92316	8.92316	8.92316	chr15	86311726	86366680	+	15_86197110_86142157_-54953|20.75|4|6	PMID:25714049	NM_145476	Tbc1d22a	exonic	301
chr12:108688312-108692636-	2.45802	8.97434	6.04613	0.0513372	0.450865	up	0	3	0	0	0	0	0	0	0	0	8.92316	10.191	8.92316	8.92316	8.92316	8.92316	8.92316	8.92316	8.92316	8.92316	chr12	108688311	108692636	-		novel	NM_027299	Degs2	sense overlapping	4325
chr2:180907594-180908474-	2.45802	8.97434	6.04613	0.0513372	0.450865	up	0	3	0	0	0	0	0	0	0	0	8.92316	10.191	8.92316	8.92316	8.92316	8.92316	8.92316	8.92316	8.92316	8.92316	chr2	180907593	180908474	-		novel	ENSMUST00000037299	Ythdf1	intronic	881
chr8:79038771-79136663+	2.45802	8.97434	6.04613	0.0513372	0.450865	up	0	3	0	0	0	0	0	0	0	0	8.92316	10.191	8.92316	8.92316	8.92316	8.92316	8.92316	8.92316	8.92316	8.92316	chr8	79038770	79136663	+		novel	NM_178267	Zfp827	sense overlapping	97893
chr15:38040753-38041607-	2.45802	8.97434	6.04613	0.0513372	0.450865	up	0	3	0	0	0	0	0	0	0	0	8.92316	10.191	8.92316	8.92316	8.92316	8.92316	8.92316	8.92316	8.92316	8.92316	chr15	38040752	38041607	-		novel	NM_001081359	Ubr5	exonic	310
chr1:36343251-36358460-	2.45802	8.99281	5.55697	0.0513372	0.450865	up	0	3	0	0	0	0	0	0	0	0	8.92316	10.191	8.92316	8.92316	8.92316	8.92316	8.92316	8.92316	8.92316	8.92316	chr1	36343250	36358460	-		novel	NM_172652	Kansl3	exonic	2227
chrX:164394433-164400858+	2.45802	8.97434	6.04613	0.0513372	0.450865	up	0	3	0	0	0	0	0	0	0	0	8.92316	10.191	8.92316	8.92316	8.92316	8.92316	8.92316	8.92316	8.92316	8.92316	chrX	164394432	164400858	+		novel	NM_010216	Figf	exonic	446
chr8:34154600-34170753+	2.45802	8.97434	6.04613	0.0513372	0.450865	up	0	3	0	0	0	0	0	0	0	0	8.92316	10.191	8.92316	8.92316	8.92316	8.92316	8.92316	8.92316	8.92316	8.92316	chr8	34154599	34170753	+		novel	NM_026432	Saraf	sense overlapping	16154
chr14:56634212-56655614+	2.45802	8.97434	6.04613	0.0513372	0.450865	up	0	3	0	0	0	0	0	0	0	0	8.92316	10.191	8.92316	8.92316	8.92316	8.92316	8.92316	8.92316	8.92316	8.92316	chr14	56634211	56655614	+		novel	NM_001145978	Parp4	exonic	2372
chr18:74616923-74625705+	2.45802	8.99081	5.60798	0.0513372	0.450865	up	0	3	0	0	0	0	0	0	0	0	8.92316	10.191	8.92316	8.92316	8.92316	8.92316	8.92316	8.92316	8.92316	8.92316	chr18	74616922	74625705	+		novel	NM_201600	Myo5b	exonic	301
chr5:147450653-147492571+	2.45802	8.97434	6.04613	0.0513372	0.450865	up	0	3	0	0	0	0	0	0	0	0	8.92316	10.191	8.92316	8.92316	8.92316	8.92316	8.92316	8.92316	8.92316	8.92316	chr5	147450652	147492571	+		novel	NM_028291	Pan3	sense overlapping	41919
chr13:106979477-106982612-	2.45802	8.97434	6.04613	0.0513372	0.450865	up	0	3	0	0	0	0	0	0	0	0	8.92316	10.191	8.92316	8.92316	8.92316	8.92316	8.92316	8.92316	8.92316	8.92316	chr13	106979476	106982612	-		novel	NM_008442	Kif2a	sense overlapping	3136
chr4:102595987-102597557+	2.45802	8.97434	6.04613	0.0513372	0.450865	up	0	3	0	0	0	0	0	0	0	0	8.92316	10.191	8.92316	8.92316	8.92316	8.92316	8.92316	8.92316	8.92316	8.92316	chr4	102595986	102597557	+		novel	NM_019840	Pde4b	sense overlapping	1571
chr11:33478164-33504828-	2.45802	8.97434	6.04613	0.0513372	0.450865	up	0	3	0	0	0	0	0	0	0	0	8.92316	10.191	8.92316	8.92316	8.92316	8.92316	8.92316	8.92316	8.92316	8.92316	chr11	33478163	33504828	-		novel	NM_023146	Ranbp17	exonic	1256
chr12:116415425-116430198+	2.45802	8.97434	6.04613	0.0513372	0.450865	up	0	3	0	0	0	0	0	0	0	0	8.92316	10.191	8.92316	8.92316	8.92316	8.92316	8.92316	8.92316	8.92316	8.92316	chr12	116415424	116430198	+		novel	NM_133762	Ncapg2	exonic	1266
chr6:29361294-29361487+	2.45802	8.97434	6.04613	0.0513372	0.450865	up	0	3	0	0	0	0	0	0	0	0	8.92316	10.191	8.92316	8.92316	8.92316	8.92316	8.92316	8.92316	8.92316	8.92316	chr6	29361293	29361487	+		novel	NM_007594	Calu	exonic	194
chr2:58980370-59004064-	2.45802	8.99254	5.5639	0.0513372	0.450865	up	0	3	0	0	0	0	0	0	0	0	8.92316	10.191	8.92316	8.92316	8.92316	8.92316	8.92316	8.92316	8.92316	8.92316	chr2	58980369	59004064	-	2_58856475_58832781_-23694|19.35|14|36	PMID:25714049	NM_001001178	Ccdc148	exonic	856
chr1:179795677-179799338-	2.45802	8.97434	6.04613	0.0513372	0.450865	up	0	3	0	0	0	0	0	0	0	0	8.92316	10.191	8.92316	8.92316	8.92316	8.92316	8.92316	8.92316	8.92316	8.92316	chr1	179795676	179799338	-		novel	NM_026375	Ahctf1	exonic	382
chr1:106000931-106021858+	2.45802	8.97434	6.04613	0.0513372	0.450865	up	0	3	0	0	0	0	0	0	0	0	8.92316	10.191	8.92316	8.92316	8.92316	8.92316	8.92316	8.92316	8.92316	8.92316	chr1	106000930	106021858	+		novel	NM_001122675	Zcchc2	exonic	744
chr2:5458380-5458598-	2.45802	8.97434	6.04613	0.0513372	0.450865	up	0	3	0	0	0	0	0	0	0	0	8.92316	10.191	8.92316	8.92316	8.92316	8.92316	8.92316	8.92316	8.92316	8.92316	chr2	5458379	5458598	-		novel	NM_001290374	Camk1d	intronic	219
chr13:96088220-96088900-	2.45802	8.97434	6.04613	0.0513372	0.450865	up	0	3	0	0	0	0	0	0	0	0	8.92316	10.191	8.92316	8.92316	8.92316	8.92316	8.92316	8.92316	8.92316	8.92316	chr13	96088219	96088900	-		novel	NM_029210	Sv2c	exonic	681
chr19:7509348-7510126+	2.45802	8.97434	6.04613	0.0513372	0.450865	up	0	3	0	0	0	0	0	0	0	0	8.92316	10.191	8.92316	8.92316	8.92316	8.92316	8.92316	8.92316	8.92316	8.92316	chr19	7509347	7510126	+		novel	NM_146091	Atl3	exonic	359
chr7:119775483-119777176+	2.45802	8.97434	6.04613	0.0513372	0.450865	up	0	3	0	0	0	0	0	0	0	0	8.92316	10.191	8.92316	8.92316	8.92316	8.92316	8.92316	8.92316	8.92316	8.92316	chr7	119775482	119777176	+		novel	NM_016870	Acsm3	exonic	204
chr3:139010560-139011098-	2.45802	8.97434	6.04613	0.0513372	0.450865	up	0	3	0	0	0	0	0	0	0	0	8.92316	10.191	8.92316	8.92316	8.92316	8.92316	8.92316	8.92316	8.92316	8.92316	chr3	139010559	139011098	-		novel	ENSMUST00000029796	Rap1gds1	intronic	539
chr11:85204234-85216554-	2.45802	8.97434	6.04613	0.0513372	0.450865	up	0	3	0	0	0	0	0	0	0	0	8.92316	10.191	8.92316	8.92316	8.92316	8.92316	8.92316	8.92316	8.92316	8.92316	chr11	85204233	85216554	-		novel	NM_025825	Appbp2	sense overlapping	12321
chr14:14820778-14885128+	2.45802	8.97434	6.04613	0.0513372	0.450865	up	0	3	0	0	0	0	0	0	0	0	8.92316	10.191	8.92316	8.92316	8.92316	8.92316	8.92316	8.92316	8.92316	8.92316	chr14	14820777	14885128	+		novel	NM_001195229	Nek10	sense overlapping	64351
chr2:28858736-28863775+	2.45789	9.00781	5.23287	0.0513372	0.450865	up	0	3	0	0	0	0	0	0	0	0	8.92316	10.191	8.92316	8.92316	8.92316	8.92316	8.92316	8.92316	8.92316	8.92316	chr2	28858735	28863775	+	2_28719295_28714256_-5039|15.83|4|4	PMID:25714049	NM_001033294	Ddx31	exonic	673
chr2:23164499-23175252+	2.45787	9.00924	5.19681	0.0513372	0.450865	up	0	3	0	0	0	0	0	0	0	0	8.92316	10.191	8.92316	8.92316	8.92316	8.92316	8.92316	8.92316	8.92316	8.92316	chr2	23164498	23175252	+	2_23030772_23020019_-10753|14.88|4|4	PMID:25714049	NM_013771	Yme1l1	exonic	444
chrX:23756440-23769996+	2.45786	9.01023	5.17203	0.0513372	0.450865	up	0	3	0	0	0	0	0	0	0	0	8.92316	10.191	8.92316	8.92316	8.92316	8.92316	8.92316	8.92316	8.92316	8.92316	chrX	23756439	23769996	+		novel	NM_175180	Wdr44	exonic	1201
chr4:40163719-40167191+	2.45774	9.25693	3.80089	0.0513372	0.450865	up	0	0	1	1	1	0	0	0	0	0	8.92316	8.92316	9.48818	9.48344	9.48822	8.92316	8.92316	8.92316	8.92316	8.92316	chr4	40163718	40167191	+	4_40114224_40110752_-3472|16.15|14|20	PMID:25714049	NM_007386	Aco1	exonic	434
chr3:109647672-109664433+	2.45771	9.25725	3.79976	0.0513372	0.450865	up	0	0	2	1	0	0	0	0	0	0	8.92316	8.92316	9.89315	9.48344	8.92316	8.92316	8.92316	8.92316	8.92316	8.92316	chr3	109647671	109664433	+	mmu_circ_0001159	circBase	NM_020505	Vav3	exonic	436
chr5:3390681-3429158+	2.45719	9.02504	5.1672	0.0513372	0.450865	up	0	3	0	0	0	0	0	0	0	0	8.92316	10.191	8.92316	8.92316	8.92316	8.92316	8.92316	8.92316	8.92316	8.92316	chr5	3390680	3429158	+		novel	NM_009873	Cdk6	exonic	304
chr14:57856610-57878459-	2.4571	9.07844	4.96162	0.0513372	0.450865	up	0	2	0	1	0	0	0	0	0	0	8.92316	9.87826	8.92316	9.48344	8.92316	8.92316	8.92316	8.92316	8.92316	8.92316	chr14	57856609	57878459	-	14_58497296_58475447_-21849|24.05|20|126	PMID:25714049	NM_029492	Zdhhc20	exonic	476
chrX:93474313-93493581-	2.45678	9.03162	5.19997	0.0513372	0.450865	up	0	3	0	0	0	0	0	0	0	0	8.92316	10.191	8.92316	8.92316	8.92316	8.92316	8.92316	8.92316	8.92316	8.92316	chrX	93474312	93493581	-	X_90738920_90719652_-19268|19.16|5|6	PMID:25714049	NM_008892	Pola1	exonic	772
chr6:28523727-28545598+	2.45659	9.03462	5.2013	0.0513372	0.450865	up	0	3	0	0	0	0	0	0	0	0	8.92316	10.191	8.92316	8.92316	8.92316	8.92316	8.92316	8.92316	8.92316	8.92316	chr6	28523726	28545598	+	6_28495598_28473727_-21871|19.20|11|17	PMID:25714049	NM_019776	Snd1	exonic	803
chr14:45354946-45366659+	2.45637	9.23982	3.85494	0.0513372	0.450865	up	0	1	1	0	1	0	0	0	0	0	8.92316	9.47834	9.48818	8.92316	9.48822	8.92316	8.92316	8.92316	8.92316	8.92316	chr14	45354945	45366659	+		novel	NM_019637	Styx	exonic	246
chr7:59240967-59262058+	2.45557	9.15323	4.31272	0.0513372	0.450865	up	0	2	0	0	1	0	0	0	0	0	8.92316	9.87826	8.92316	8.92316	9.48822	8.92316	8.92316	8.92316	8.92316	8.92316	chr7	59240966	59262058	+		novel	NM_011668	Ube3a	sense overlapping	21092
chr12:85121987-85123871+	2.45531	9.26532	3.7682	0.0522362	0.450865	up	0	1	2	0	0	0	0	0	0	0	8.92316	9.47834	9.89315	8.92316	8.92316	8.92316	8.92316	8.92316	8.92316	8.92316	chr12	85121986	85123871	+	12_86464821_86462937_-1884|17.43|8|9	PMID:25714049	NM_030225	Dlst	exonic	328
chr18:80137484-80142769-	2.45517	9.05926	5.07653	0.0513372	0.450865	up	0	3	0	0	0	0	0	0	0	0	8.92316	10.191	8.92316	8.92316	8.92316	8.92316	8.92316	8.92316	8.92316	8.92316	chr18	80137483	80142769	-	18_80339508_80334223_-5285|19.55|2|3	PMID:25714049	NM_175028	Adnp2	exonic	211
chr1:189671048-189682951-	2.45509	9.06055	5.07111	0.0513372	0.450865	up	0	3	0	0	0	0	0	0	0	0	8.92316	10.191	8.92316	8.92316	8.92316	8.92316	8.92316	8.92316	8.92316	8.92316	chr1	189671047	189682951	-	1_191506830_191494927_-11903|17.31|6|7	PMID:25714049	NM_001081363	Cenpf	exonic	943
chr4:135331721-135341035-	2.45478	9.06584	5.04101	0.0513372	0.450865	up	0	3	0	0	0	0	0	0	0	0	8.92316	10.191	8.92316	8.92316	8.92316	8.92316	8.92316	8.92316	8.92316	8.92316	chr4	135331720	135341035	-		novel	NM_016799	Srrm1	exonic	752
chr6:33438380-33442039+	2.45455	9.28667	3.69112	0.0547035	0.450865	up	0	1	2	0	0	0	0	0	0	0	8.92316	9.47834	9.89315	8.92316	8.92316	8.92316	8.92316	8.92316	8.92316	8.92316	chr6	33438379	33442039	+	6_33392039_33388380_-3659|15.50|8|11	PMID:25714049	NM_009148	Exoc4	exonic	235
chr19:28283652-28357952-	2.45405	9.07766	4.95993	0.0513372	0.450865	up	0	3	0	0	0	0	0	0	0	0	8.92316	10.191	8.92316	8.92316	8.92316	8.92316	8.92316	8.92316	8.92316	8.92316	chr19	28283651	28357952	-	19_28432442_28358142_-74300|20.62|4|5	PMID:25714049	NM_175459	Glis3	exonic	778
chr7:131044493-131053220+	2.45394	9.07929	4.94807	0.0513372	0.450865	up	0	3	0	0	0	0	0	0	0	0	8.92316	10.191	8.92316	8.92316	8.92316	8.92316	8.92316	8.92316	8.92316	8.92316	chr7	131044492	131053220	+		novel	NM_007769	Dmbt1	exonic	447
chr7:65336032-65343739-	2.45325	9.09034	4.84242	0.0513372	0.450865	up	0	3	0	0	0	0	0	0	0	0	8.92316	10.191	8.92316	8.92316	8.92316	8.92316	8.92316	8.92316	8.92316	8.92316	chr7	65336031	65343739	-	7_72488625_72480918_-7707|16.06|12|22	PMID:25714049	NM_009386	Tjp1	exonic	926
chr9:60375953-60428525-	2.45261	9.10333	4.70606	0.0513372	0.450865	up	0	3	0	0	0	0	0	0	0	0	8.92316	10.191	8.92316	8.92316	8.92316	8.92316	8.92316	8.92316	8.92316	8.92316	chr9	60375952	60428525	-	9_60276332_60223760_-52572|20.27|2|2	PMID:25714049	NM_001040426	Thsd4	exonic	913
chr19:17563782-17586146-	2.45192	9.11882	4.59431	0.0513372	0.450865	up	0	3	0	0	0	0	0	0	0	0	8.92316	10.191	8.92316	8.92316	8.92316	8.92316	8.92316	8.92316	8.92316	8.92316	chr19	17563781	17586146	-		novel	NM_001163144	Pcsk5	exonic	1007
chr6:4707074-4719496-	2.45179	9.12192	4.56871	0.0513372	0.450865	up	0	3	0	0	0	0	0	0	0	0	8.92316	10.191	8.92316	8.92316	8.92316	8.92316	8.92316	8.92316	8.92316	8.92316	chr6	4707073	4719496	-	6_4669496_4657074_-12422|17.36|18|63	PMID:25714049	NM_011360	Sgce	exonic	553
chr14:60690854-60692548+	2.45165	9.12518	4.54072	0.0513372	0.450865	up	0	3	0	0	0	0	0	0	0	0	8.92316	10.191	8.92316	8.92316	8.92316	8.92316	8.92316	8.92316	8.92316	8.92316	chr14	60690853	60692548	+	14_61311385_61309691_-1694|20.02|2|2	PMID:25714049	NM_001033272	Spata13	exonic	1695
chr15:98740421-98742829-	2.45151	9.26109	3.77518	0.0520189	0.450865	up	0	2	0	0	1	0	0	0	0	0	8.92316	9.87826	8.92316	8.92316	9.48822	8.92316	8.92316	8.92316	8.92316	8.92316	chr15	98740420	98742829	-	15_98573260_98570852_-2408|11.34|12|29	PMID:25714049	NM_007478	Arf3	sense overlapping	2409
chr19:4342847-4394892-	2.45097	9.21696	3.94389	0.0513372	0.450865	up	0	2	0	1	0	0	0	0	0	0	8.92316	9.87826	8.92316	9.48344	8.92316	8.92316	8.92316	8.92316	8.92316	8.92316	chr19	4342846	4394892	-	19_4394892_4342847_-52045|16.60|18|55	PMID:25714049	NM_001001984	Kdm2a	exonic	1538
chr1:39555478-39565332-	2.45074	9.28632	3.68527	0.0548956	0.450865	up	0	2	1	0	0	0	0	0	0	0	8.92316	9.87826	9.48818	8.92316	8.92316	8.92316	8.92316	8.92316	8.92316	8.92316	chr1	39555477	39565332	-	1_39622177_39612323_-9854|17.85|17|39	PMID:25714049	NM_001033135	Rnf149	exonic	693
chr13:43419576-43425214-	2.4492	9.41481	3.40754	0.0648996	0.450865	up	0	1	0	1	1	0	0	0	0	0	8.92316	9.47834	8.92316	9.48344	9.48822	8.92316	8.92316	8.92316	8.92316	8.92316	chr13	43419575	43425214	-	mmu_circ_0000457	circBase	NM_019930	Ranbp9	exonic	598
chr14:72563484-72584844-	2.44652	9.6696	3.17858	0.0746101	0.450865	up	0	0	0	2	1	0	0	0	0	0	8.92316	8.92316	8.92316	9.88598	9.48822	8.92316	8.92316	8.92316	8.92316	8.92316	chr14	72563483	72584844	-	mmu_circ_0000552	circBase	NM_207636	Fndc3a	exonic	1335
chr9:124423792-124440885+	2.43385	9.97394	6.69845	0.00964991	0.450865	up	1	2	6	11	1	2	0	0	1	0	9.40746	9.87826	10.8779	11.5601	9.48822	9.98893	8.92316	8.92316	9.49515	8.92316	chr9	124423791	124440885	+		novel	NR_015516	4930526I15Rik	sense overlapping	17094
chr1:128193460-128223641+	2.42666	9.46252	3.29344	0.0695577	0.450865	up	1	0	0	0	2	0	0	0	0	0	9.40746	8.92316	8.92316	8.92316	9.89321	8.92316	8.92316	8.92316	8.92316	8.92316	chr1	128193459	128223641	+	mmu_circ_0000075	circBase	NM_181750	R3hdm1	exonic	1005
chr2:119902606-119903733+	2.4232	9.27896	3.65918	0.0557617	0.450865	up	1	0	1	1	0	0	0	0	0	0	9.40746	8.92316	9.48818	9.48344	8.92316	8.92316	8.92316	8.92316	8.92316	8.92316	chr2	119902605	119903733	+	2_119729469_119728342_-1127|22.35|17|44	PMID:25714049	NM_013720	Mga	exonic	1128
chr6:99428789-99435345-	2.42284	9.25482	3.73978	0.053132	0.450865	up	1	0	1	1	0	0	0	0	0	0	9.40746	8.92316	9.48818	9.48344	8.92316	8.92316	8.92316	8.92316	8.92316	8.92316	chr6	99428788	99435345	-	mmu_circ_0001498	circBase	NM_053202	Foxp1	sense overlapping	6557
chr4:118096243-118107693-	2.4228	9.12203	4.50161	0.0513372	0.450865	up	1	0	0	0	2	0	0	0	0	0	9.40746	8.92316	8.92316	8.92316	9.89321	8.92316	8.92316	8.92316	8.92316	8.92316	chr4	118096242	118107693	-		novel	NM_009176	St3gal3	sense overlapping	11451
chr7:112544177-112547613+	2.42277	9.1208	4.51164	0.0513372	0.450865	up	1	0	0	0	2	0	0	0	0	0	9.40746	8.92316	8.92316	8.92316	9.89321	8.92316	8.92316	8.92316	8.92316	8.92316	chr7	112544176	112547613	+	7_119691127_119687691_-3436|17.34|2|2	PMID:25714049	NM_020606	Parva	exonic	264
chr10:28334476-28354779+	2.42233	9.10069	4.6515	0.0513372	0.450865	up	1	0	0	0	2	0	0	0	0	0	9.40746	8.92316	8.92316	8.92316	9.89321	8.92316	8.92316	8.92316	8.92316	8.92316	chr10	28334475	28354779	+	10_28074585_28054282_-20303|20.49|8|14	PMID:25714049	NM_008983	Ptprk	exonic	373
chr8:13298637-13304079+	2.4218	9.08128	4.85604	0.0513372	0.450865	up	1	0	0	0	2	0	0	0	0	0	9.40746	8.92316	8.92316	8.92316	9.89321	8.92316	8.92316	8.92316	8.92316	8.92316	chr8	13298636	13304079	+		novel	NM_172282	Tmco3	sense overlapping	5443
chr3:84863964-84904079+	2.42153	9.29796	3.59697	0.0578854	0.450865	up	1	1	0	0	1	0	0	0	0	0	9.40746	9.47834	8.92316	8.92316	9.48822	8.92316	8.92316	8.92316	8.92316	8.92316	chr3	84863963	84904079	+	3_84708001_84667886_-40115|17.73|21|64	PMID:25714049	NM_001177773	Fbxw7	exonic	691
chr3:132743002-132774596+	2.42117	9.06095	4.9893	0.0513372	0.450865	up	1	0	0	0	2	0	0	0	0	0	9.40746	8.92316	8.92316	8.92316	9.89321	8.92316	8.92316	8.92316	8.92316	8.92316	chr3	132743001	132774596	+	3_132437560_132405966_-31594|17.52|6|6	PMID:25714049	NM_001163455	Tbck	exonic	461
chr11:108434126-108531465+	2.421	9.05687	5.00386	0.0513372	0.450865	up	1	0	2	0	0	0	0	0	0	0	9.40746	8.92316	9.89315	8.92316	8.92316	8.92316	8.92316	8.92316	8.92316	8.92316	chr11	108434125	108531465	+	mmu_circ_0002747	circBase	NM_029606	Cep112	exonic	1741
chr6:112672124-112681676-	2.42091	9.15068	4.25165	0.0513372	0.450865	up	1	0	0	1	1	0	0	0	0	0	9.40746	8.92316	8.92316	9.48344	9.48822	8.92316	8.92316	8.92316	8.92316	8.92316	chr6	112672123	112681676	-	mmu_circ_0001504	circBase	NM_021385	Rad18	exonic	700
chr13:9136779-9151224+	2.42046	9.0363	5.11574	0.0513372	0.450865	up	1	0	0	0	2	0	0	0	0	0	9.40746	8.92316	8.92316	8.92316	9.89321	8.92316	8.92316	8.92316	8.92316	8.92316	chr13	9136778	9151224	+	13_9150470_9136025_-14445|19.28|8|16	PMID:25714049	NM_172585	Larp4b	exonic	990
chr7:132949585-132973623+	2.42016	9.22727	3.83748	0.0513372	0.450865	up	1	1	0	0	1	0	0	0	0	0	9.40746	9.47834	8.92316	8.92316	9.48822	8.92316	8.92316	8.92316	8.92316	8.92316	chr7	132949584	132973623	+	mmu_circ_0001639	circBase	uc009kcv.2	Zranb1	exonic	1464
chr18:75229990-75243398+	2.42013	9.02738	5.10235	0.0513372	0.450865	up	1	0	2	0	0	0	0	0	0	0	9.40746	8.92316	9.89315	8.92316	8.92316	8.92316	8.92316	8.92316	8.92316	8.92316	chr18	75229989	75243398	+	18_75403052_75389644_-13408|15.39|8|12	PMID:25714049	NM_027727	Dym	exonic	297
chr17:6198672-6207057+	2.42012	9.02544	5.08925	0.0513372	0.450865	up	1	0	0	0	2	0	0	0	0	0	9.40746	8.92316	8.92316	8.92316	9.89321	8.92316	8.92316	8.92316	8.92316	8.92316	chr17	6198671	6207057	+	17_6207057_6198672_-8385|21.73|10|17	PMID:25714049	NM_054040	Tulp4	exonic	483
chr5:137149662-137149949-	2.4201	9.11844	4.52465	0.0513372	0.450865	up	1	0	1	1	0	0	0	0	0	0	9.40746	8.92316	9.48818	9.48344	8.92316	8.92316	8.92316	8.92316	8.92316	8.92316	chr5	137149661	137149949	-		novel			intergenic	288
chr2:20871392-20892177-	2.41969	8.97308	5.98774	0.0513372	0.450865	up	1	0	0	0	2	0	0	0	0	0	9.40746	8.92316	8.92316	8.92316	9.89321	8.92316	8.92316	8.92316	8.92316	8.92316	chr2	20871391	20892177	-		novel	NM_001081364	Arhgap21	exonic	2380
chr10:34001137-34012137-	2.41969	8.97308	5.98774	0.0513372	0.450865	up	1	0	0	0	2	0	0	0	0	0	9.40746	8.92316	8.92316	8.92316	9.89321	8.92316	8.92316	8.92316	8.92316	8.92316	chr10	34001136	34012137	-	mmu_circ_0002168	circBase	NM_025614	Rwdd1	exonic	537
chr2:71495151-71512168+	2.41969	8.97308	5.98774	0.0513372	0.450865	up	1	0	0	0	2	0	0	0	0	0	9.40746	8.92316	8.92316	8.92316	9.89321	8.92316	8.92316	8.92316	8.92316	8.92316	chr2	71495150	71512168	+	2_71350225_71333208_-17017|18.59|2|2	PMID:25714049	NR_039557	Mir5098	intronic	17018
chr1:39300644-39338199+	2.41963	8.97308	5.98764	0.0513372	0.450865	up	1	0	2	0	0	0	0	0	0	0	9.40746	8.92316	9.89315	8.92316	8.92316	8.92316	8.92316	8.92316	8.92316	8.92316	chr1	39300643	39338199	+		novel	NM_008719	Npas2	exonic	1368
chr3:89428512-89428803+	2.41963	8.97308	5.98764	0.0513372	0.450865	up	1	0	2	0	0	0	0	0	0	0	9.40746	8.92316	9.89315	8.92316	8.92316	8.92316	8.92316	8.92316	8.92316	8.92316	chr3	89428511	89428803	+		novel	NM_011368	Shc1	sense overlapping	292
chr3:89424873-89426857+	2.41963	8.97308	5.98764	0.0513372	0.450865	up	1	0	2	0	0	0	0	0	0	0	9.40746	8.92316	9.89315	8.92316	8.92316	8.92316	8.92316	8.92316	8.92316	8.92316	chr3	89424872	89426857	+		novel	NM_011368	Shc1	sense overlapping	1985
chr12:35085939-35112504+	2.41963	8.99102	5.5166	0.0513372	0.450865	up	1	0	2	0	0	0	0	0	0	0	9.40746	8.92316	9.89315	8.92316	8.92316	8.92316	8.92316	8.92316	8.92316	8.92316	chr12	35085938	35112504	+	12_35797176_35770611_-26565|11.29|6|9	PMID:25714049	NM_001014973	Snx13	exonic	1477
chr5:73300664-73310426+	2.41963	8.97308	5.98764	0.0513372	0.450865	up	1	0	2	0	0	0	0	0	0	0	9.40746	8.92316	9.89315	8.92316	8.92316	8.92316	8.92316	8.92316	8.92316	8.92316	chr5	73300663	73310426	+	5_73701665_73691903_-9762|16.93|2|2	PMID:25714049	NM_023429	Ociad1	exonic	567
chr17:24091421-24111117-	2.41855	9.1762	3.94734	0.0469459	0.450865	up	3	0	4	2	0	0	1	0	0	0	10.0585	8.92316	10.468	9.88598	8.92316	8.92316	9.49805	8.92316	8.92316	8.92316	chr17	24091420	24111117	-	mmu_circ_0000729	circBase	NM_011062	Pdpk1	exonic	1110
chr6:47484744-47497388+	2.41841	9.07072	4.9179	0.0513372	0.450865	up	1	0	1	1	0	0	0	0	0	0	9.40746	8.92316	9.48818	9.48344	8.92316	8.92316	8.92316	8.92316	8.92316	8.92316	chr6	47484743	47497388	+	6_47447387_47434743_-12644|17.20|4|5	PMID:25714049	NM_012042	Cul1	exonic	644
chr12:35078900-35092913+	2.41802	9.06087	4.9825	0.0513372	0.450865	up	1	0	1	1	0	0	0	0	0	0	9.40746	8.92316	9.48818	9.48344	8.92316	8.92316	8.92316	8.92316	8.92316	8.92316	chr12	35078899	35092913	+	12_35777585_35763572_-14013|18.94|10|17	PMID:25714049	NM_001014973	Snx13	exonic	741
chr2:68358814-68369105-	2.41802	9.22441	3.84508	0.0513372	0.450865	up	1	1	0	1	0	0	0	0	0	0	9.40746	9.47834	8.92316	9.48344	8.92316	8.92316	8.92316	8.92316	8.92316	8.92316	chr2	68358813	68369105	-	2_68207162_68196871_-10291|20.07|18|48	PMID:25714049	NM_016866	Stk39	exonic	461
chr8:91101348-91102309+	2.41783	9.05617	4.99846	0.0513372	0.450865	up	1	0	1	1	0	0	0	0	0	0	9.40746	8.92316	9.48818	9.48344	8.92316	8.92316	8.92316	8.92316	8.92316	8.92316	chr8	91101347	91102309	+		novel	NM_011250	Rbl2	exonic	277
chr6:136559764-136566785+	2.4177	9.12345	4.47864	0.0513372	0.450865	up	1	0	0	2	0	0	0	0	0	0	9.40746	8.92316	8.92316	9.88598	8.92316	8.92316	8.92316	8.92316	8.92316	8.92316	chr6	136559763	136566785	+	6_136515306_136508285_-7021|15.06|15|23	PMID:25714049	NM_019426	Atf7ip	exonic	2038
chr6:65855949-65886178+	2.4176	9.04945	5.0195	0.0513372	0.450865	up	1	0	0	1	1	0	0	0	0	0	9.40746	8.92316	8.92316	9.48344	9.48822	8.92316	8.92316	8.92316	8.92316	8.92316	chr6	65855948	65886178	+	6_65836172_65805943_-30229|18.95|7|11	PMID:25714049	NM_027547	Prdm5	exonic	1144
chr11:94067893-94071686+	2.41704	9.10521	4.61222	0.0513372	0.450865	up	1	0	0	2	0	0	0	0	0	0	9.40746	8.92316	8.92316	9.88598	8.92316	8.92316	8.92316	8.92316	8.92316	8.92316	chr11	94067892	94071686	+	11_93933000_93929207_-3793|15.14|14|17	PMID:25714049	NM_027569	Spag9	exonic	430
chr9:116105034-116131713-	2.41635	9.08832	4.77749	0.0513372	0.450865	up	1	0	0	2	0	0	0	0	0	0	9.40746	8.92316	8.92316	9.88598	8.92316	8.92316	8.92316	8.92316	8.92316	8.92316	chr9	116105033	116131713	-		novel	NM_009371	Tgfbr2	exonic	1302
chr7:138868410-138876717+	2.41522	9.07122	4.90633	0.0513372	0.450865	up	1	1	0	0	1	0	0	0	0	0	9.40746	9.47834	8.92316	8.92316	9.48822	8.92316	8.92316	8.92316	8.92316	8.92316	chr7	138868409	138876717	+	7_146068400_146060093_-8307|17.82|8|12	PMID:25714049	NM_026391	Ppp2r2d	exonic	982
chr13:76741294-76806262+	2.41444	9.05136	5.00367	0.0513372	0.450865	up	1	0	0	2	0	0	0	0	0	0	9.40746	8.92316	8.92316	9.88598	8.92316	8.92316	8.92316	8.92316	8.92316	8.92316	chr13	76741293	76806262	+		novel	uc007rgq.1	Mctp1	exonic	643
chr9:115276704-115280519-	2.41429	9.05294	4.99631	0.0513372	0.450865	up	1	1	0	0	1	0	0	0	0	0	9.40746	9.47834	8.92316	8.92316	9.48822	8.92316	8.92316	8.92316	8.92316	8.92316	chr9	115276703	115280519	-	9_115189637_115185822_-3815|20.12|8|11	PMID:25714049	NM_024222	Stt3b	exonic	397
chr10:12475271-12486654-	2.41407	9.04346	5.06549	0.0513372	0.450865	up	1	0	0	2	0	0	0	0	0	0	9.40746	8.92316	8.92316	9.88598	8.92316	8.92316	8.92316	8.92316	8.92316	8.92316	chr10	12475270	12486654	-	10_12206452_12195069_-11383|19.59|2|2	PMID:25714049	NM_011682	Utrn	exonic	556
chr8:79663725-79664111+	2.4139	9.04472	5.0554	0.0513372	0.450865	up	1	1	0	0	1	0	0	0	0	0	9.40746	9.47834	8.92316	8.92316	9.48822	8.92316	8.92316	8.92316	8.92316	8.92316	chr8	79663724	79664111	+	8_82188010_82187624_-386|14.25|2|2	PMID:25714049	NM_001081164	Otud4	exonic	291
chr18:53189655-53203119+	2.41378	9.09726	4.65626	0.0513372	0.450865	up	1	1	0	1	0	0	0	0	0	0	9.40746	9.47834	8.92316	9.48344	8.92316	8.92316	8.92316	8.92316	8.92316	8.92316	chr18	53189654	53203119	+	18_53362773_53349309_-13464|15.45|17|40	PMID:25714049	NM_026386	Snx2	exonic	614
chr18:36581068-36591541+	2.41322	9.02715	5.08618	0.0513372	0.450865	up	1	0	0	2	0	0	0	0	0	0	9.40746	8.92316	8.92316	9.88598	8.92316	8.92316	8.92316	8.92316	8.92316	8.92316	chr18	36581067	36591541	+	18_36751195_36740722_-10473|10.76|5|5	PMID:25714049	NM_175375	Ankhd1	exonic	625
chr3:145004720-145004949-	2.41303	9.14314	4.28865	0.0513372	0.450865	up	1	2	0	0	0	0	0	0	0	0	9.40746	9.87826	8.92316	8.92316	8.92316	8.92316	8.92316	8.92316	8.92316	8.92316	chr3	145004719	145004949	-		novel	NM_017474	Clca1	sense overlapping	230
chr1:139040000-139110485+	2.41303	9.02372	5.05917	0.0513372	0.450865	up	1	0	0	2	0	0	0	0	0	0	9.40746	8.92316	8.92316	9.88598	8.92316	8.92316	8.92316	8.92316	8.92316	8.92316	chr1	139039999	139110485	+	mmu_circ_0000082	circBase	NM_181347	Dennd1b	exonic	963
chr2:163627872-163629217-	2.41264	9.02107	5.0284	0.0513372	0.450865	up	1	1	0	0	1	0	0	0	0	0	9.40746	9.47834	8.92316	8.92316	9.48822	8.92316	8.92316	8.92316	8.92316	8.92316	chr2	163627871	163629217	-		novel	NM_012032	Serinc3	exonic	272
chr1:10172834-10216559-	2.41237	8.97286	5.97649	0.0513372	0.450865	up	1	0	0	2	0	0	0	0	0	0	9.40746	8.92316	8.92316	9.88598	8.92316	8.92316	8.92316	8.92316	8.92316	8.92316	chr1	10172833	10216559	-		novel	NM_001102430	Arfgef1	exonic	3156
chr2:71822438-71826811+	2.41237	8.97286	5.97649	0.0513372	0.450865	up	1	0	0	2	0	0	0	0	0	0	9.40746	8.92316	8.92316	9.88598	8.92316	8.92316	8.92316	8.92316	8.92316	8.92316	chr2	71822437	71826811	+	2_71664868_71660495_-4373|20.08|2|3	PMID:25714049	NM_008397	Itga6	exonic	626
chr2:156223335-156254310+	2.41231	9.58741	4.02282	0.0448891	0.450865	up	2	2	1	4	0	0	0	1	0	0	9.7694	9.87826	9.48818	10.4583	8.92316	8.92316	8.92316	9.53126	8.92316	8.92316	chr2	156223334	156254310	+	2_156080046_156049071_-30975|17.46|10|38	PMID:25714049	NM_172674	Phf20	exonic	372
chr2:22323574-22362143+	2.4121	9.12164	4.48146	0.0513372	0.450865	up	1	2	0	0	0	0	0	0	0	0	9.40746	9.87826	8.92316	8.92316	8.92316	8.92316	8.92316	8.92316	8.92316	8.92316	chr2	22323573	22362143	+		novel	NM_148413	Myo3a	exonic	823
chr1:177043775-177067333-	2.41125	9.05557	4.98491	0.0513372	0.450865	up	1	1	0	1	0	0	0	0	0	0	9.40746	9.47834	8.92316	9.48344	8.92316	8.92316	8.92316	8.92316	8.92316	8.92316	chr1	177043774	177067333	-	mmu_circ_0000116	circBase	NM_011785	Akt3	exonic	555
chr4:129838978-129846539+	2.40894	9.07103	4.89367	0.0513372	0.450865	up	1	2	0	0	0	0	0	0	0	0	9.40746	9.87826	8.92316	8.92316	8.92316	8.92316	8.92316	8.92316	8.92316	8.92316	chr4	129838977	129846539	+	4_129523783_129516222_-7561|21.55|4|7	PMID:25714049	NM_008974	Ptp4a2	exonic	1000
chr1:133259009-133274374+	2.40862	9.00912	5.09695	0.0513372	0.450865	up	1	1	0	1	0	0	0	0	0	0	9.40746	9.47834	8.92316	9.48344	8.92316	8.92316	8.92316	8.92316	8.92316	8.92316	chr1	133259008	133274374	+		novel	NM_182930	Plekha6	exonic	1618
chr7:132971186-132973623+	2.40831	9.06192	4.95534	0.0513372	0.450865	up	1	2	0	0	0	0	0	0	0	0	9.40746	9.87826	8.92316	8.92316	8.92316	8.92316	8.92316	8.92316	8.92316	8.92316	chr7	132971185	132973623	+	mmu_circ_0001641	circBase	NM_207302	Zranb1	exonic	425
chr14:30565488-30569139+	2.40798	9.05748	4.97268	0.0513372	0.450865	up	1	2	0	0	0	0	0	0	0	0	9.40746	9.87826	8.92316	8.92316	8.92316	8.92316	8.92316	8.92316	8.92316	8.92316	chr14	30565487	30569139	+	14_31382325_31378674_-3651|14.35|3|3	PMID:25714049	NM_009388	Tkt	exonic	670
chr15:73012806-73031643-	2.40798	9.05743	4.97282	0.0513372	0.450865	up	1	2	0	0	0	0	0	0	0	0	9.40746	9.87826	8.92316	8.92316	8.92316	8.92316	8.92316	8.92316	8.92316	8.92316	chr15	73012805	73031643	-	mmu_circ_0000610	circBase	NM_029640	Trappc9	exonic	465
chr18:36572659-36583759+	2.4079	9.05645	4.97536	0.0513372	0.450865	up	1	2	0	0	0	0	0	0	0	0	9.40746	9.87826	8.92316	8.92316	8.92316	8.92316	8.92316	8.92316	8.92316	8.92316	chr18	36572658	36583759	+	18_36743413_36732313_-11100|18.51|2|2	PMID:25714049	NM_175375	Ankhd1	sense overlapping	11101
chr2:148686514-148690983+	2.40766	9.05322	4.98019	0.0513372	0.450865	up	1	2	0	0	0	0	0	0	0	0	9.40746	9.87826	8.92316	8.92316	8.92316	8.92316	8.92316	8.92316	8.92316	8.92316	chr2	148686513	148690983	+	2_148516719_148512250_-4469|14.75|16|49	PMID:25714049	NM_028986	Gzf1	sense overlapping	4470
chr13:94208136-94233180-	2.40551	9.02385	5.0445	0.0513372	0.450865	up	1	2	0	0	0	0	0	0	0	0	9.40746	9.87826	8.92316	8.92316	8.92316	8.92316	8.92316	8.92316	8.92316	8.92316	chr13	94208135	94233180	-	13_95003135_94978091_-25044|16.59|5|5	PMID:25714049	NM_029153	Scamp1	exonic	717
chr16:18946346-18947518+	2.40468	9.00608	5.16421	0.0513372	0.450865	up	1	2	0	0	0	0	0	0	0	0	9.40746	9.87826	8.92316	8.92316	8.92316	8.92316	8.92316	8.92316	8.92316	8.92316	chr16	18946345	18947518	+	16_18947611_18946439_-1172|17.61|11|22	PMID:25714049	NM_010435	Hira	exonic	307
chr11:23756899-23761155-	2.40454	8.97262	5.96443	0.0513372	0.450865	up	1	2	0	0	0	0	0	0	0	0	9.40746	9.87826	8.92316	8.92316	8.92316	8.92316	8.92316	8.92316	8.92316	8.92316	chr11	23756898	23761155	-		novel	NM_009044	Rel	exonic	292
chr4:150500003-150510038+	2.39854	9.41997	3.95316	0.0467838	0.450865	up	2	5	0	1	1	0	0	0	0	1	9.7694	10.6659	8.92316	9.48344	9.48822	8.92316	8.92316	8.92316	8.92316	9.55928	chr4	150500002	150510038	+	mmu_circ_0001305	circBase	NM_001085492	Rere	exonic	274
chr4:58861525-58885498-	2.39344	9.42896	3.9354	0.0472804	0.450865	up	3	0	2	2	2	1	0	0	0	0	10.0585	8.92316	9.89315	9.88598	9.89321	9.5523	8.92316	8.92316	8.92316	8.92316	chr4	58861524	58885498	-	mmu_circ_0001213	circBase	NM_172381	AI314180	exonic	1031
chr3:133320936-133339349+	2.39094	9.2993	3.53755	0.0599946	0.450865	up	2	0	0	1	0	0	0	0	0	0	9.7694	8.92316	8.92316	9.48344	8.92316	8.92316	8.92316	8.92316	8.92316	8.92316	chr3	133320935	133339349	+	3_133002313_132983900_-18413|19.27|7|7	PMID:25714049	NM_146141	Ppa2	exonic	371
chr7:116364428-116368189-	2.38134	9.18086	3.98361	0.0513372	0.450865	up	2	0	0	1	0	0	0	0	0	0	9.7694	8.92316	8.92316	9.48344	8.92316	8.92316	8.92316	8.92316	8.92316	8.92316	chr7	116364427	116368189	-	7_123511703_123507942_-3761|19.38|14|28	PMID:25714049	NM_011083	Pik3c2a	exonic	335
chr1:89604598-89634294+	2.37885	9.1334	4.30637	0.0513372	0.450865	up	2	0	1	0	0	0	0	0	0	0	9.7694	8.92316	9.48818	8.92316	8.92316	8.92316	8.92316	8.92316	8.92316	8.92316	chr1	89604597	89634294	+	mmu_circ_0000059	circBase	NM_178119	Agap1	exonic	510
chr6:134739812-134761434-	2.37806	9.17199	4.03515	0.0513372	0.450865	up	2	1	0	0	0	0	0	0	0	0	9.7694	9.47834	8.92316	8.92316	8.92316	8.92316	8.92316	8.92316	8.92316	8.92316	chr6	134739811	134761434	-	6_134711452_134689830_-21622|19.61|7|8	PMID:25714049	NM_130447	Dusp16	exonic	892
chr10:122904092-122920845+	2.37515	9.10473	4.5209	0.0513372	0.450865	up	2	0	0	0	1	0	0	0	0	0	9.7694	8.92316	8.92316	8.92316	9.48822	8.92316	8.92316	8.92316	8.92316	8.92316	chr10	122904091	122920845	+	10_122357901_122341148_-16753|18.33|11|44	PMID:25714049	NM_001110218	Ppm1h	exonic	324
chr11:43704534-43705567+	2.37223	9.08654	4.69397	0.0513372	0.450865	up	2	0	0	0	1	0	0	0	0	0	9.7694	8.92316	8.92316	8.92316	9.48822	8.92316	8.92316	8.92316	8.92316	8.92316	chr11	43704533	43705567	+	11_43519069_43518036_-1033|17.57|8|8	PMID:25714049	AK146302		intronic	1034
chr15:85882674-85885192+	2.37065	9.09357	4.60925	0.0513372	0.450865	up	2	0	0	1	0	0	0	0	0	0	9.7694	8.92316	8.92316	9.48344	8.92316	8.92316	8.92316	8.92316	8.92316	8.92316	chr15	85882673	85885192	+	15_85715622_85713104_-2518|20.32|13|22	PMID:25714049	NM_028063	Trmu	exonic	273
chr15:89242160-89246340+	2.3701	9.07609	4.77434	0.0513372	0.450865	up	2	0	0	0	1	0	0	0	0	0	9.7694	8.92316	8.92316	8.92316	9.48822	8.92316	8.92316	8.92316	8.92316	8.92316	chr15	89242159	89246340	+	15_89076771_89072591_-4180|20.16|14|51	PMID:25714049	NM_026813	Ppp6r2	exonic	367
chr1:43960084-43973520+	2.37003	9.07579	4.77607	0.0513372	0.450865	up	2	0	0	0	1	0	0	0	0	0	9.7694	8.92316	8.92316	8.92316	9.48822	8.92316	8.92316	8.92316	8.92316	8.92316	chr1	43960083	43973520	+	1_44030365_44016929_-13436|19.02|14|33	PMID:25714049	NM_009418	Tpp2	exonic	897
chr6:31418931-31431249+	2.3662	9.05626	4.88043	0.0513372	0.450865	up	2	0	1	0	0	0	0	0	0	0	9.7694	8.92316	9.48818	8.92316	8.92316	8.92316	8.92316	8.92316	8.92316	8.92316	chr6	31418930	31431249	+		novel	NM_013791	Mkln1	exonic	412
chr14:122123716-122139774+	2.36322	9.05734	4.87079	0.0513372	0.450865	up	2	0	0	1	0	0	0	0	0	0	9.7694	8.92316	8.92316	9.48344	8.92316	8.92316	8.92316	8.92316	8.92316	8.92316	chr14	122123715	122139774	+	14_122538996_122522938_-16058|18.68|6|8	PMID:25714049	NM_080556	Tm9sf2	exonic	545
chr19:10082565-10091851-	2.3623	9.05304	4.87803	0.0513372	0.450865	up	2	0	0	1	0	0	0	0	0	0	9.7694	8.92316	8.92316	9.48344	8.92316	8.92316	8.92316	8.92316	8.92316	8.92316	chr19	10082564	10091851	-		novel	NM_019699	Fads2	exonic	537
chr8:79343654-79353446-	2.35986	9.02392	4.94775	0.0513372	0.450865	up	2	0	1	0	0	0	0	0	0	0	9.7694	8.92316	9.48818	8.92316	8.92316	8.92316	8.92316	8.92316	8.92316	8.92316	chr8	79343653	79353446	-	8_81877345_81867553_-9792|16.36|7|10	PMID:25714049	NM_008539	Smad1	exonic	596
chr14:118499966-118516588-	2.35955	9.02237	4.93206	0.0513372	0.450865	up	2	0	0	0	1	0	0	0	0	0	9.7694	8.92316	8.92316	8.92316	9.48822	8.92316	8.92316	8.92316	8.92316	8.92316	chr14	118499965	118516588	-		novel	NM_001033336	Abcc4	exonic	525
chr15:32538665-32550462+	2.35953	9.02226	4.93074	0.0513372	0.450865	up	2	0	0	0	1	0	0	0	0	0	9.7694	8.92316	8.92316	8.92316	9.48822	8.92316	8.92316	8.92316	8.92316	8.92316	chr15	32538664	32550462	+		novel	NM_009154	Sema5a	exonic	376
chr12:51921338-51925173-	2.35917	9.02077	4.9127	0.0513372	0.450865	up	2	0	1	0	0	0	0	0	0	0	9.7694	8.92316	9.48818	8.92316	8.92316	8.92316	8.92316	8.92316	8.92316	8.92316	chr12	51921337	51925173	-	12_53026160_53022325_-3835|19.43|3|3	PMID:25714049	NM_177171	Heatr5a	exonic	282
chr10:12525338-12538213-	2.35846	9.0513	4.87748	0.0513372	0.450865	up	2	1	0	0	0	0	0	0	0	0	9.7694	9.47834	8.92316	8.92316	8.92316	8.92316	8.92316	8.92316	8.92316	8.92316	chr10	12525337	12538213	-	10_12258011_12245136_-12875|22.71|2|3	PMID:25714049	NM_011682	Utrn	exonic	330
chr5:100444033-100485855-	2.35751	9.00203	5.16548	0.0513372	0.450865	up	2	0	0	0	1	0	0	0	0	0	9.7694	8.92316	8.92316	8.92316	9.48822	8.92316	8.92316	8.92316	8.92316	8.92316	chr5	100444032	100485855	-		novel	NM_172714	Lin54	sense overlapping	41823
chr9:115207514-115217029+	2.35731	8.98799	5.45471	0.0513372	0.450865	up	2	0	0	0	1	0	0	0	0	0	9.7694	8.92316	8.92316	8.92316	9.48822	8.92316	8.92316	8.92316	8.92316	8.92316	chr9	115207513	115217029	+	9_115126147_115116632_-9515|14.38|6|9	PMID:25714049	NM_148958	Osbpl10	exonic	631
chr16:11140717-11141771-	2.35731	8.98792	5.45639	0.0513372	0.450865	up	2	0	0	0	1	0	0	0	0	0	9.7694	8.92316	8.92316	8.92316	9.48822	8.92316	8.92316	8.92316	8.92316	8.92316	chr16	11140716	11141771	-		novel	NM_145931	Zc3h7a	exonic	243
chr7:131111093-131112250+	2.35731	8.98959	5.41492	0.0513372	0.450865	up	2	0	0	0	1	0	0	0	0	0	9.7694	8.92316	8.92316	8.92316	9.48822	8.92316	8.92316	8.92316	8.92316	8.92316	chr7	131111092	131112250	+		novel	NM_007769	Dmbt1	sense overlapping	1158
chr1:78425193-78472634-	2.35727	8.98956	5.41572	0.0513372	0.450865	up	2	0	1	0	0	0	0	0	0	0	9.7694	8.92316	9.48818	8.92316	8.92316	8.92316	8.92316	8.92316	8.92316	8.92316	chr1	78425192	78472634	-	1_78469209_78421768_-47441|16.16|2|2	PMID:25714049	NM_001278075	Farsb	exonic	1316
chr2:24852665-24877626-	2.35727	8.98956	5.41572	0.0513372	0.450865	up	2	0	1	0	0	0	0	0	0	0	9.7694	8.92316	9.48818	8.92316	8.92316	8.92316	8.92316	8.92316	8.92316	8.92316	chr2	24852664	24877626	-	2_24733146_24708185_-24961|16.08|9|16	PMID:25714049	NM_172545	Ehmt1	exonic	835
chr15:7172856-7173560+	2.3567	9.04269	4.942	0.0513372	0.450865	up	2	1	0	0	0	0	0	0	0	0	9.7694	9.47834	8.92316	8.92316	8.92316	8.92316	8.92316	8.92316	8.92316	8.92316	chr15	7172855	7173560	+	15_7123560_7122856_-704|18.36|5|7	PMID:25714049	NM_013584	Lifr	exonic	300
chr18:10001771-10007847-	2.35592	9.02236	4.92447	0.0513372	0.450865	up	2	0	0	1	0	0	0	0	0	0	9.7694	8.92316	8.92316	9.48344	8.92316	8.92316	8.92316	8.92316	8.92316	8.92316	chr18	10001770	10007847	-	18_10007845_10001769_-6076|17.22|3|4	PMID:25714049	NM_021522	Usp14	exonic	441
chr9:56474531-56482639+	2.35573	9.02158	4.91542	0.0513372	0.450865	up	2	0	0	1	0	0	0	0	0	0	9.7694	8.92316	8.92316	9.48344	8.92316	8.92316	8.92316	8.92316	8.92316	8.92316	chr9	56474530	56482639	+	9_56330446_56322338_-8108|14.04|9|14	PMID:25714049	NM_025812	Hmg20a	exonic	523
chr11:121496995-121503787+	2.35398	9.00726	5.0294	0.0513372	0.450865	up	2	0	0	1	0	0	0	0	0	0	9.7694	8.92316	8.92316	9.48344	8.92316	8.92316	8.92316	8.92316	8.92316	8.92316	chr11	121496994	121503787	+	11_121365101_121358309_-6792|18.65|6|8	PMID:25714049	NM_029878	Tbcd	exonic	374
chr12:30307172-30312673-	2.35353	8.98945	5.4103	0.0513372	0.450865	up	2	0	0	1	0	0	0	0	0	0	9.7694	8.92316	8.92316	9.48344	8.92316	8.92316	8.92316	8.92316	8.92316	8.92316	chr12	30307171	30312673	-		novel	NM_172951	Sntg2	exonic	253
chr12:111592577-111624543+	2.35353	8.98925	5.4151	0.0513372	0.450865	up	2	0	0	1	0	0	0	0	0	0	9.7694	8.92316	8.92316	9.48344	8.92316	8.92316	8.92316	8.92316	8.92316	8.92316	chr12	111592576	111624543	+	12_112862754_112830788_-31966|15.39|10|16	PMID:25714049	NM_021516	Mark3	exonic	489
chr11:87184884-87201626+	2.35353	8.97103	5.88521	0.0513372	0.450865	up	2	0	0	1	0	0	0	0	0	0	9.7694	8.92316	8.92316	9.48344	8.92316	8.92316	8.92316	8.92316	8.92316	8.92316	chr11	87184883	87201626	+		novel	NM_197987	Trim37	exonic	946
chr16:32753686-32755724+	2.35353	8.98924	5.41555	0.0513372	0.450865	up	2	0	0	1	0	0	0	0	0	0	9.7694	8.92316	8.92316	9.48344	8.92316	8.92316	8.92316	8.92316	8.92316	8.92316	chr16	32753685	32755724	+		novel	NM_080457	Muc4	sense overlapping	2039
chr5:135236275-135242542+	2.35246	9.0241	4.93398	0.0513372	0.450865	up	2	1	0	0	0	0	0	0	0	0	9.7694	9.47834	8.92316	8.92316	8.92316	8.92316	8.92316	8.92316	8.92316	8.92316	chr5	135236274	135242542	+		novel	NM_011714	Baz1b	exonic	546
chr6:47462085-47485044+	2.35164	9.02077	4.89734	0.0513372	0.450865	up	2	1	0	0	0	0	0	0	0	0	9.7694	9.47834	8.92316	8.92316	8.92316	8.92316	8.92316	8.92316	8.92316	8.92316	chr6	47462084	47485044	+		novel	NM_012042	Cul1	sense overlapping	22960
chr13:98789363-98789873-	2.3495	8.98784	5.4413	0.0513372	0.450865	up	2	1	0	0	0	0	0	0	0	0	9.7694	9.47834	8.92316	8.92316	8.92316	8.92316	8.92316	8.92316	8.92316	8.92316	chr13	98789362	98789873	-	13_99559828_99559318_-510|18.28|8|14	PMID:25714049	NM_172591	Fcho2	exonic	295
chr15:9148976-9165862+	2.3495	8.97091	5.87891	0.0513372	0.450865	up	2	1	0	0	0	0	0	0	0	0	9.7694	9.47834	8.92316	8.92316	8.92316	8.92316	8.92316	8.92316	8.92316	8.92316	chr15	9148975	9165862	+	15_9095618_9078732_-16886|13.55|9|14	PMID:25714049	NM_177178	Lmbrd2	exonic	878
chr7:130503722-130516168-	2.34688	9.20222	3.80087	0.0513372	0.450865	up	3	0	0	0	0	0	0	0	0	0	10.0585	8.92316	8.92316	8.92316	8.92316	8.92316	8.92316	8.92316	8.92316	8.92316	chr7	130503721	130516168	-	7_137659682_137647236_-12446|16.42|17|49	PMID:25714049	NM_001136054	Ate1	exonic	830
chr7:132948044-132973623+	2.33722	9.14731	4.09364	0.0513372	0.450865	up	3	0	0	0	0	0	0	0	0	0	10.0585	8.92316	8.92316	8.92316	8.92316	8.92316	8.92316	8.92316	8.92316	8.92316	chr7	132948043	132973623	+	mmu_circ_0001637	circBase	NM_207302	Zranb1	sense overlapping	25580
chr18:70580653-70593340+	2.33461	9.93098	6.01403	0.0141929	0.450865	up	4	4	8	3	1	1	0	1	0	1	10.2992	10.4479	11.1968	10.2004	9.48822	9.5523	8.92316	9.53126	8.92316	9.55928	chr18	70580652	70593340	+	mmu_circ_0007482	circBase	NM_010773	Mbd2	exonic	298
chr2:164424575-164424865-	2.33253	9.12503	4.27976	0.0513372	0.450865	up	3	0	0	0	0	0	0	0	0	0	10.0585	8.92316	8.92316	8.92316	8.92316	8.92316	8.92316	8.92316	8.92316	8.92316	chr2	164424574	164424865	-		novel	NM_011521	Sdc4	sense overlapping	291
chr13:97929411-97936861-	2.32761	10.1671	7.32634	0.00679535	0.450865	up	1	9	3	3	9	0	1	0	1	2	9.40746	11.3084	10.209	10.2004	11.3333	8.92316	9.49805	8.92316	9.49515	9.99923	chr13	97929410	97936861	-	13_98706816_98699366_-7450|18.06|14|48	PMID:25714049	NM_012026	Arhgef28	exonic	868
chr5:143723895-143728026-	2.32682	9.10275	4.42679	0.0513372	0.450865	up	3	0	0	0	0	0	0	0	0	0	10.0585	8.92316	8.92316	8.92316	8.92316	8.92316	8.92316	8.92316	8.92316	8.92316	chr5	143723894	143728026	-	5_144488895_144484764_-4131|21.41|3|5	PMID:25714049	NM_029749	Usp42	exonic	559
chr1:150428120-150429545+	2.32232	9.08795	4.56809	0.0513372	0.450865	up	3	0	0	0	0	0	0	0	0	0	10.0585	8.92316	8.92316	8.92316	8.92316	8.92316	8.92316	8.92316	8.92316	8.92316	chr1	150428119	150429545	+	1_152276675_152275250_-1425|13.68|16|22	PMID:25714049	NM_133780	Tpr	exonic	342
chr19:40363202-40373617-	2.31635	9.07277	4.67176	0.0513372	0.450865	up	3	0	0	0	0	0	0	0	0	0	10.0585	8.92316	8.92316	8.92316	8.92316	8.92316	8.92316	8.92316	8.92316	8.92316	chr19	40363201	40373617	-	19_40448107_40437692_-10415|20.21|8|11	PMID:25714049	NM_009166	Sorbs1	exonic	409
chr12:80828026-80828243+	2.31561	9.25661	3.61085	0.0574044	0.450865	up	0	0	6	2	0	0	0	0	1	0	8.92316	8.92316	10.8779	9.88598	8.92316	8.92316	8.92316	8.92316	9.49515	8.92316	chr12	80828025	80828243	+		novel	NM_178682	Susd6	exonic	218
chr12:54975104-54975382-	2.31497	9.06897	4.69715	0.0513372	0.450865	up	3	0	0	0	0	0	0	0	0	0	10.0585	8.92316	8.92316	8.92316	8.92316	8.92316	8.92316	8.92316	8.92316	8.92316	chr12	54975103	54975382	-		novel	NM_013815	Baz1a	exonic	279
chr5:144143526-144166419+	2.31493	9.06885	4.69794	0.0513372	0.450865	up	3	0	0	0	0	0	0	0	0	0	10.0585	8.92316	8.92316	8.92316	8.92316	8.92316	8.92316	8.92316	8.92316	8.92316	chr5	144143525	144166419	+	5_144927288_144904395_-22893|19.20|7|14	PMID:25714049	NM_001081109	Lmtk2	exonic	622
chr5:81511984-81512784+	2.31024	9.05615	4.756	0.0513372	0.450865	up	3	0	0	0	0	0	0	0	0	0	10.0585	8.92316	8.92316	8.92316	8.92316	8.92316	8.92316	8.92316	8.92316	8.92316	chr5	81511983	81512784	+	5_81941809_81941009_-800|20.45|12|31	PMID:25714049	NM_198702	Adgrl3	exonic	801
chr11:85531793-85559171+	2.30993	9.05535	4.75729	0.0513372	0.450865	up	3	0	0	0	0	0	0	0	0	0	10.0585	8.92316	8.92316	8.92316	8.92316	8.92316	8.92316	8.92316	8.92316	8.92316	chr11	85531792	85559171	+	11_85372673_85345295_-27378|19.03|2|2	PMID:25714049	NM_138681	Bcas3	exonic	588
chr1:72381619-72383769+	2.309	9.05297	4.76011	0.0513372	0.450865	up	3	0	0	0	0	0	0	0	0	0	10.0585	8.92316	8.92316	8.92316	8.92316	8.92316	8.92316	8.92316	8.92316	8.92316	chr1	72381618	72383769	+	1_72430343_72428193_-2150|16.45|3|4	PMID:25714049	NM_009533	Xrcc5	exonic	275
chr3:116293726-116308299-	2.3089	9.05266	4.76143	0.0513372	0.450865	up	3	0	0	0	0	0	0	0	0	0	10.0585	8.92316	8.92316	8.92316	8.92316	8.92316	8.92316	8.92316	8.92316	8.92316	chr3	116293725	116308299	-		novel	NM_001080818	Cdc14a	exonic	805
chr1:182473882-182481651-	2.30493	9.04146	4.83598	0.0513372	0.450865	up	3	0	0	0	0	0	0	0	0	0	10.0585	8.92316	8.92316	8.92316	8.92316	8.92316	8.92316	8.92316	8.92316	8.92316	chr1	182473881	182481651	-		novel	NM_009794	Capn2	sense overlapping	7770
chr5:73148017-73221072-	2.3043	9.03978	4.84447	0.0513372	0.450865	up	3	0	0	0	0	0	0	0	0	0	10.0585	8.92316	8.92316	8.92316	8.92316	8.92316	8.92316	8.92316	8.92316	8.92316	chr5	73148016	73221072	-	mmu_circ_0012767	circBase	NM_028194	Fryl	exonic	499
chr5:65072242-65080191-	2.30383	9.03854	4.84959	0.0513372	0.450865	up	3	0	0	0	0	0	0	0	0	0	10.0585	8.92316	8.92316	8.92316	8.92316	8.92316	8.92316	8.92316	8.92316	8.92316	chr5	65072241	65080191	-		novel	ENSMUST00000043352	Tmem156	exonic	735
chr7:130663016-130674739+	2.30351	9.0377	4.85252	0.0513372	0.450865	up	3	0	0	0	0	0	0	0	0	0	10.0585	8.92316	8.92316	8.92316	8.92316	8.92316	8.92316	8.92316	8.92316	8.92316	chr7	130663015	130674739	+	mmu_circ_0013939	circBase	NM_206856	Tacc2	exonic	264
chr7:35787718-35795618-	2.30307	9.03656	4.85572	0.0513372	0.450865	up	3	0	0	0	0	0	0	0	0	0	10.0585	8.92316	8.92316	8.92316	8.92316	8.92316	8.92316	8.92316	8.92316	8.92316	chr7	35787717	35795618	-		novel	NM_177739	Zfp507	exonic	2326
chr13:8819863-8861265-	2.30267	9.03551	4.85788	0.0513372	0.450865	up	3	0	0	0	0	0	0	0	0	0	10.0585	8.92316	8.92316	8.92316	8.92316	8.92316	8.92316	8.92316	8.92316	8.92316	chr13	8819862	8861265	-	13_8860511_8819109_-41402|15.00|12|17	PMID:25714049	NM_172445	Wdr37	exonic	1399
chr6:119045111-119057515-	2.29955	9.02777	4.84541	0.0513372	0.450865	up	3	0	0	0	0	0	0	0	0	0	10.0585	8.92316	8.92316	8.92316	8.92316	8.92316	8.92316	8.92316	8.92316	8.92316	chr6	119045110	119057515	-	6_119007533_118995129_-12404|15.61|5|6	PMID:25714049	NM_009781	Cacna1c	sense overlapping	12405
chr1:178678826-178715969+	2.29772	9.02342	4.81366	0.0513372	0.450865	up	3	0	0	0	0	0	0	0	0	0	10.0585	8.92316	8.92316	8.92316	8.92316	8.92316	8.92316	8.92316	8.92316	8.92316	chr1	178678825	178715969	+	1_180646100_180608957_-37143|21.77|4|7	PMID:25714049	NM_001161665	Kif26b	exonic	701
chr2:18071125-18109891+	2.29687	9.02145	4.79263	0.0513372	0.450865	up	3	0	0	0	0	0	0	0	0	0	10.0585	8.92316	8.92316	8.92316	8.92316	8.92316	8.92316	8.92316	8.92316	8.92316	chr2	18071124	18109891	+	mmu_circ_0000980	circBase	NM_010804	Mllt10	exonic	245
chr17:43486211-43487310-	2.29603	9.01951	4.76753	0.0513372	0.450865	up	3	0	0	0	0	0	0	0	0	0	10.0585	8.92316	8.92316	8.92316	8.92316	8.92316	8.92316	8.92316	8.92316	8.92316	chr17	43486210	43487310	-		novel	NM_008585	Mep1a	exonic	372
chr13:77192554-77193223+	2.29575	9.01886	4.75817	0.0513372	0.450865	up	3	0	0	0	0	0	0	0	0	0	10.0585	8.92316	8.92316	8.92316	8.92316	8.92316	8.92316	8.92316	8.92316	8.92316	chr13	77192553	77193223	+	mmu_circ_0004810	circBase	NM_001145676	2210408I21Rik	exonic	670
chr14:105141196-105153632-	2.29344	9.00433	4.9761	0.0513372	0.450865	up	3	0	0	0	0	0	0	0	0	0	10.0585	8.92316	8.92316	8.92316	8.92316	8.92316	8.92316	8.92316	8.92316	8.92316	chr14	105141195	105153632	-	14_105552849_105540413_-12436|16.05|3|3	PMID:25714049	NM_134077	Rbm26	exonic	1438
chr13:55233895-55238862+	2.29332	9.00289	5.01052	0.0513372	0.450865	up	3	0	0	0	0	0	0	0	0	0	10.0585	8.92316	8.92316	8.92316	8.92316	8.92316	8.92316	8.92316	8.92316	8.92316	chr13	55233894	55238862	+	13_55340223_55335256_-4967|15.63|9|13	PMID:25714049	NM_008739	Nsd1	exonic	309
chr13:75892906-75939638-	2.29326	9.00216	5.02812	0.0513372	0.450865	up	3	0	0	0	0	0	0	0	0	0	10.0585	8.92316	8.92316	8.92316	8.92316	8.92316	8.92316	8.92316	8.92316	8.92316	chr13	75892905	75939638	-	13_76077086_76030354_-46732|18.39|9|12	PMID:25714049	NM_028493	Rhobtb3	exonic	1054
chr18:20579040-20579478+	2.29284	8.98599	5.36197	0.0513372	0.450865	up	3	0	0	0	0	0	0	0	0	0	10.0585	8.92316	8.92316	8.92316	8.92316	8.92316	8.92316	8.92316	8.92316	8.92316	chr18	20579039	20579478	+		novel	NM_007883	Dsg2	exonic	307
chr17:35890694-35892085+	2.29284	8.96919	5.78958	0.0513372	0.450865	up	3	0	0	0	0	0	0	0	0	0	10.0585	8.92316	8.92316	8.92316	8.92316	8.92316	8.92316	8.92316	8.92316	8.92316	chr17	35890693	35892085	+		novel	ENSMUST00000173967	Dhx16	intronic	1392
chr14:20177016-20177214-	2.29284	8.98599	5.36197	0.0513372	0.450865	up	3	0	0	0	0	0	0	0	0	0	10.0585	8.92316	8.92316	8.92316	8.92316	8.92316	8.92316	8.92316	8.92316	8.92316	chr14	20177015	20177214	-		novel	ENSMUST00000024011	Kcnk5	intronic	199
chr3:79506207-79518191-	2.29284	8.98746	5.32612	0.0513372	0.450865	up	3	0	0	0	0	0	0	0	0	0	10.0585	8.92316	8.92316	8.92316	8.92316	8.92316	8.92316	8.92316	8.92316	8.92316	chr3	79506206	79518191	-	3_79322113_79310129_-11984|17.03|2|3	PMID:25714049	NM_001162999	Fnip2	exonic	620
chr9:115061833-115067325+	2.29284	8.96919	5.78958	0.0513372	0.450865	up	3	0	0	0	0	0	0	0	0	0	10.0585	8.92316	8.92316	8.92316	8.92316	8.92316	8.92316	8.92316	8.92316	8.92316	chr9	115061832	115067325	+	9_114976443_114970951_-5492|22.53|2|2	PMID:25714049	ENSMUST00000182384	Osbpl10	exonic	256
chr5:143928942-143944641+	2.29284	8.96919	5.78958	0.0513372	0.450865	up	3	0	0	0	0	0	0	0	0	0	10.0585	8.92316	8.92316	8.92316	8.92316	8.92316	8.92316	8.92316	8.92316	8.92316	chr5	143928941	143944641	+		novel	NM_008886	Pms2	sense overlapping	15700
chr12:80116444-80116805+	2.29284	8.96919	5.78958	0.0513372	0.450865	up	3	0	0	0	0	0	0	0	0	0	10.0585	8.92316	8.92316	8.92316	8.92316	8.92316	8.92316	8.92316	8.92316	8.92316	chr12	80116443	80116805	+		novel	AK005005		sense overlapping	362
chr6:37949222-37960855+	2.29284	8.96919	5.78958	0.0513372	0.450865	up	3	0	0	0	0	0	0	0	0	0	10.0585	8.92316	8.92316	8.92316	8.92316	8.92316	8.92316	8.92316	8.92316	8.92316	chr6	37949221	37960855	+	6_37910855_37899222_-11633|18.56|4|4	PMID:25714049	NM_145076	Trim24	exonic	1266
chr17:42815945-42820657-	2.29284	8.96919	5.78958	0.0513372	0.450865	up	3	0	0	0	0	0	0	0	0	0	10.0585	8.92316	8.92316	8.92316	8.92316	8.92316	8.92316	8.92316	8.92316	8.92316	chr17	42815944	42820657	-	17_42957606_42952894_-4712|18.86|2|2	PMID:25714049	NM_009847	Cd2ap	exonic	372
chr19:60823085-60824724+	2.29284	8.96919	5.78958	0.0513372	0.450865	up	3	0	0	0	0	0	0	0	0	0	10.0585	8.92316	8.92316	8.92316	8.92316	8.92316	8.92316	8.92316	8.92316	8.92316	chr19	60823084	60824724	+		novel	ENSMUST00000025957	Fam45a	intronic	1640
chr9:32262950-32263230+	2.29284	8.96919	5.78958	0.0513372	0.450865	up	3	0	0	0	0	0	0	0	0	0	10.0585	8.92316	8.92316	8.92316	8.92316	8.92316	8.92316	8.92316	8.92316	8.92316	chr9	32262949	32263230	+		novel	NM_177379	Arhgap32	sense overlapping	281
chr11:50297058-50301054-	2.29284	8.96919	5.78958	0.0513372	0.450865	up	3	0	0	0	0	0	0	0	0	0	10.0585	8.92316	8.92316	8.92316	8.92316	8.92316	8.92316	8.92316	8.92316	8.92316	chr11	50297057	50301054	-	11_50114556_50110560_-3996|19.10|14|35	PMID:25714049	NM_007597	Canx	exonic	694
chr5:103861063-103876289-	2.29284	8.96919	5.78958	0.0513372	0.450865	up	3	0	0	0	0	0	0	0	0	0	10.0585	8.92316	8.92316	8.92316	8.92316	8.92316	8.92316	8.92316	8.92316	8.92316	chr5	103861062	103876289	-		novel	NM_178741	Klhl8	sense overlapping	15227
chr13:92263721-92300358-	2.29284	8.96919	5.78958	0.0513372	0.450865	up	3	0	0	0	0	0	0	0	0	0	10.0585	8.92316	8.92316	8.92316	8.92316	8.92316	8.92316	8.92316	8.92316	8.92316	chr13	92263720	92300358	-	13_93070313_93033676_-36637|15.71|3|3	PMID:25714049	NM_010829	Msh3	exonic	867
chr6:13581450-13581683-	2.29284	8.96919	5.78958	0.0513372	0.450865	up	3	0	0	0	0	0	0	0	0	0	10.0585	8.92316	8.92316	8.92316	8.92316	8.92316	8.92316	8.92316	8.92316	8.92316	chr6	13581449	13581683	-		novel	NM_028990	Tmem168	sense overlapping	234
chr10:56027899-56040279-	2.29284	8.96919	5.78958	0.0513372	0.450865	up	3	0	0	0	0	0	0	0	0	0	10.0585	8.92316	8.92316	8.92316	8.92316	8.92316	8.92316	8.92316	8.92316	8.92316	chr10	56027898	56040279	-		novel	NM_001033385	Tbc1d32	exonic	330
chr4:155543031-155551721+	2.29284	8.96919	5.78958	0.0513372	0.450865	up	3	0	0	0	0	0	0	0	0	0	10.0585	8.92316	8.92316	8.92316	8.92316	8.92316	8.92316	8.92316	8.92316	8.92316	chr4	155543030	155551721	+		novel	NM_008142	Gnb1	exonic	230
chrX:103476450-103476802-	2.29284	8.96919	5.78958	0.0513372	0.450865	up	3	0	0	0	0	0	0	0	0	0	10.0585	8.92316	8.92316	8.92316	8.92316	8.92316	8.92316	8.92316	8.92316	8.92316	chrX	103476449	103476802	-		novel	NR_001463	Xist	sense overlapping	353
chr3:30237978-30262774-	2.29284	8.98763	5.32201	0.0513372	0.450865	up	3	0	0	0	0	0	0	0	0	0	10.0585	8.92316	8.92316	8.92316	8.92316	8.92316	8.92316	8.92316	8.92316	8.92316	chr3	30237977	30262774	-		novel	ENSMUST00000173495	Mecom	intronic	24797
chr14:45614163-45620840-	2.29284	8.98474	5.39269	0.0513372	0.450865	up	3	0	0	0	0	0	0	0	0	0	10.0585	8.92316	8.92316	8.92316	8.92316	8.92316	8.92316	8.92316	8.92316	8.92316	chr14	45614162	45620840	-	14_46240515_46233838_-6677|14.70|3|7	PMID:25714049	NM_176845	Ddhd1	exonic	491
chr1:55003491-55005801-	2.29284	8.96919	5.78958	0.0513372	0.450865	up	3	0	0	0	0	0	0	0	0	0	10.0585	8.92316	8.92316	8.92316	8.92316	8.92316	8.92316	8.92316	8.92316	8.92316	chr1	55003490	55005801	-		novel	ENSMUST00000027127	Sf3b1	intronic	2311
chr15:10478669-10481759-	2.29284	8.96919	5.78958	0.0513372	0.450865	up	3	0	0	0	0	0	0	0	0	0	10.0585	8.92316	8.92316	8.92316	8.92316	8.92316	8.92316	8.92316	8.92316	8.92316	chr15	10478668	10481759	-		novel	NM_026396	Brix1	exonic	392
chr4:56822518-56847999-	2.29284	8.96919	5.78958	0.0513372	0.450865	up	3	0	0	0	0	0	0	0	0	0	10.0585	8.92316	8.92316	8.92316	8.92316	8.92316	8.92316	8.92316	8.92316	8.92316	chr4	56822517	56847999	-		novel	NM_018761	Ctnnal1	exonic	1488
chr15:95011316-95074533+	2.29284	8.96919	5.78958	0.0513372	0.450865	up	3	0	0	0	0	0	0	0	0	0	10.0585	8.92316	8.92316	8.92316	8.92316	8.92316	8.92316	8.92316	8.92316	8.92316	chr15	95011315	95074533	+		novel	NM_178789	Tmem117	exonic	290
chr18:32079671-32097490+	2.29284	8.96919	5.78958	0.0513372	0.450865	up	3	0	0	0	0	0	0	0	0	0	10.0585	8.92316	8.92316	8.92316	8.92316	8.92316	8.92316	8.92316	8.92316	8.92316	chr18	32079670	32097490	+		novel	NM_173441	Iws1	sense overlapping	17820
chr19:23167249-23167465+	2.29284	8.96919	5.78958	0.0513372	0.450865	up	3	0	0	0	0	0	0	0	0	0	10.0585	8.92316	8.92316	8.92316	8.92316	8.92316	8.92316	8.92316	8.92316	8.92316	chr19	23167248	23167465	+		novel	AK009928		sense overlapping	217
chr14:76133100-76134936+	2.29284	8.96919	5.78958	0.0513372	0.450865	up	3	0	0	0	0	0	0	0	0	0	10.0585	8.92316	8.92316	8.92316	8.92316	8.92316	8.92316	8.92316	8.92316	8.92316	chr14	76133099	76134936	+		novel	NM_013745	Nufip1	sense overlapping	1837
chr10:7911439-7920405-	2.29284	8.96919	5.78958	0.0513372	0.450865	up	3	0	0	0	0	0	0	0	0	0	10.0585	8.92316	8.92316	8.92316	8.92316	8.92316	8.92316	8.92316	8.92316	8.92316	chr10	7911438	7920405	-		novel	NM_138667	Tab2	sense overlapping	8967
chr9:20347304-20350612-	2.29284	8.96919	5.78958	0.0513372	0.450865	up	3	0	0	0	0	0	0	0	0	0	10.0585	8.92316	8.92316	8.92316	8.92316	8.92316	8.92316	8.92316	8.92316	8.92316	chr9	20347303	20350612	-	9_20155056_20151748_-3308|14.46|2|4	PMID:25714049	NM_001004190	Zfp560	sense overlapping	3309
chr12:110661745-110663006+	2.29284	8.96919	5.78958	0.0513372	0.450865	up	3	0	0	0	0	0	0	0	0	0	10.0585	8.92316	8.92316	8.92316	8.92316	8.92316	8.92316	8.92316	8.92316	8.92316	chr12	110661744	110663006	+		novel	NM_030238	Dync1h1	sense overlapping	1262
chr1:53319943-53321210+	2.29284	8.96919	5.78958	0.0513372	0.450865	up	3	0	0	0	0	0	0	0	0	0	10.0585	8.92316	8.92316	8.92316	8.92316	8.92316	8.92316	8.92316	8.92316	8.92316	chr1	53319942	53321210	+		novel	NR_104360	Osgepl1	exonic	485
chr3:108115763-108118458-	2.29284	8.98548	5.37446	0.0513372	0.450865	up	3	0	0	0	0	0	0	0	0	0	10.0585	8.92316	8.92316	8.92316	8.92316	8.92316	8.92316	8.92316	8.92316	8.92316	chr3	108115762	108118458	-		novel	NM_010306	Gnai3	exonic	287
chr10:9835834-9843361-	2.29284	8.96919	5.78958	0.0513372	0.450865	up	3	0	0	0	0	0	0	0	0	0	10.0585	8.92316	8.92316	8.92316	8.92316	8.92316	8.92316	8.92316	8.92316	8.92316	chr10	9835833	9843361	-	10_9563159_9555632_-7527|23.23|4|4	PMID:25714049	NM_001081344	Stxbp5	exonic	407
chr8:36950175-36950526-	2.29284	8.96919	5.78958	0.0513372	0.450865	up	3	0	0	0	0	0	0	0	0	0	10.0585	8.92316	8.92316	8.92316	8.92316	8.92316	8.92316	8.92316	8.92316	8.92316	chr8	36950174	36950526	-		novel	ENSMUST00000036104	Dlc1	intronic	352
chr18:20582719-20590076+	2.29284	8.96919	5.78958	0.0513372	0.450865	up	3	0	0	0	0	0	0	0	0	0	10.0585	8.92316	8.92316	8.92316	8.92316	8.92316	8.92316	8.92316	8.92316	8.92316	chr18	20582718	20590076	+		novel	NM_007883	Dsg2	sense overlapping	7358
chr4:139428156-139429655+	2.29284	8.96919	5.78958	0.0513372	0.450865	up	3	0	0	0	0	0	0	0	0	0	10.0585	8.92316	8.92316	8.92316	8.92316	8.92316	8.92316	8.92316	8.92316	8.92316	chr4	139428155	139429655	+		novel	ENSMUST00000147999	Ubr4	intronic	1500
chr11:109716439-109717390-	2.29284	8.96919	5.78958	0.0513372	0.450865	up	3	0	0	0	0	0	0	0	0	0	10.0585	8.92316	8.92316	8.92316	8.92316	8.92316	8.92316	8.92316	8.92316	8.92316	chr11	109716438	109717390	-		novel	ENSMUST00000020938	Fam20a	intronic	952
chr19:53949819-54003146+	2.29284	8.96919	5.78958	0.0513372	0.450865	up	3	0	0	0	0	0	0	0	0	0	10.0585	8.92316	8.92316	8.92316	8.92316	8.92316	8.92316	8.92316	8.92316	8.92316	chr19	53949818	54003146	+	19_54077636_54024309_-53327|11.74|2|3	PMID:25714049	NM_019658	Shoc2	sense overlapping	53328
chr2:146314923-146357368-	2.29284	8.98599	5.36197	0.0513372	0.450865	up	3	0	0	0	0	0	0	0	0	0	10.0585	8.92316	8.92316	8.92316	8.92316	8.92316	8.92316	8.92316	8.92316	8.92316	chr2	146314922	146357368	-		novel	NM_001033348	Ralgapa2	sense overlapping	42446
chr5:134265737-134287043-	2.29284	8.96919	5.78958	0.0513372	0.450865	up	3	0	0	0	0	0	0	0	0	0	10.0585	8.92316	8.92316	8.92316	8.92316	8.92316	8.92316	8.92316	8.92316	8.92316	chr5	134265736	134287043	-		novel	NM_010365	Gtf2i	exonic	690
chr17:28428352-28441053-	2.28959	9.28608	3.53052	0.0602493	0.450865	up	1	1	4	2	0	0	1	0	0	0	9.40746	9.47834	10.468	9.88598	8.92316	8.92316	9.49805	8.92316	8.92316	8.92316	chr17	28428351	28441053	-	17_28577998_28565297_-12701|19.20|11|21	PMID:25714049	NM_010220	Fkbp5	exonic	529
chr14:78982236-78984302+	2.28929	9.26998	3.53745	0.059998	0.450865	up	1	0	2	5	0	0	1	0	0	0	9.40746	8.92316	9.89315	10.6771	8.92316	8.92316	9.49805	8.92316	8.92316	8.92316	chr14	78982235	78984302	+	14_79384109_79382043_-2066|13.92|8|10	PMID:25714049	NM_027906	Vwa8	exonic	275
chr17:67287391-67287932-	2.25174	9.48612	3.43885	0.0636806	0.450865	up	3	0	3	1	1	0	1	0	0	0	10.0585	8.92316	10.209	9.48344	9.48822	8.92316	9.49805	8.92316	8.92316	8.92316	chr17	67287390	67287932	-	mmu_circ_0006946	circBase	ENSMUST00000037974	Ptprm	intronic	542
chr9:48230361-48233282+	2.24964	9.25483	3.4258	0.0641858	0.450865	up	3	2	2	0	1	0	1	0	0	0	10.0585	9.87826	9.89315	8.92316	9.48822	8.92316	9.49805	8.92316	8.92316	8.92316	chr9	48230360	48233282	+	9_48041365_48038444_-2921|20.91|10|17	PMID:25714049	uc009phu.2	Nxpe4	intronic	2922
chr12:84292284-84298202+	2.24853	9.3835	3.43727	0.0637414	0.450865	up	2	0	5	1	0	1	0	0	0	0	9.7694	8.92316	10.6874	9.48344	8.92316	9.5523	8.92316	8.92316	8.92316	8.92316	chr12	84292283	84298202	+	mmu_circ_0004268	circBase	NM_029880	Ptgr2	exonic	396
chr14:121337422-121337652-	2.2483	9.31	3.42246	0.0643158	0.450865	up	2	3	1	2	0	0	0	1	0	0	9.7694	10.191	9.48818	9.88598	8.92316	8.92316	8.92316	9.53126	8.92316	8.92316	chr14	121337421	121337652	-	14_121736874_121736644_-230|23.42|2|2	PMID:25714049	NM_145465	Stk24	exonic	231
chr8:79091833-79136663+	2.23306	9.49075	3.38742	0.0656963	0.450865	up	4	1	0	2	1	0	0	0	1	0	10.2992	9.47834	8.92316	9.88598	9.48822	8.92316	8.92316	8.92316	9.49515	8.92316	chr8	79091832	79136663	+	mmu_circ_0001696	circBase	NM_178267	Zfp827	exonic	636
chr3:90034065-90047899-	2.23148	9.40692	3.39145	0.0655357	0.450865	up	3	3	0	2	0	0	0	1	0	0	10.0585	10.191	8.92316	9.88598	8.92316	8.92316	8.92316	9.53126	8.92316	8.92316	chr3	90034064	90047899	-	3_89851821_89837987_-13834|18.49|10|18	PMID:25714049	NM_028475	Ubap2l	exonic	743
chr4:87840682-87841389-	2.22716	9.389	3.37771	0.0660845	0.450865	up	3	2	3	0	0	1	0	0	0	0	10.0585	9.87826	10.209	8.92316	8.92316	9.5523	8.92316	8.92316	8.92316	8.92316	chr4	87840681	87841389	-	4_87487293_87486586_-707|21.38|17|128	PMID:25714049	NM_027326	Mllt3	exonic	708
chr9:14571623-14575439-	2.21172	9.24887	3.31999	0.0684427	0.450865	up	5	1	0	0	2	0	0	0	1	0	10.5055	9.47834	8.92316	8.92316	9.89321	8.92316	8.92316	8.92316	9.49515	8.92316	chr9	14571622	14575439	-	mmu_circ_0001745	circBase	NM_001081395	Amotl1	exonic	524
chr10:108268572-108274188+	2.20349	9.31921	3.30244	0.0691775	0.450865	up	4	2	0	1	1	1	0	0	0	0	10.2992	9.87826	8.92316	9.48344	9.48822	9.5523	8.92316	8.92316	8.92316	8.92316	chr10	108268571	108274188	+	10_107711244_107705628_-5616|15.42|15|32	PMID:25714049	NM_027892	Ppp1r12a	exonic	371
chr1:139085883-139110485+	2.19229	9.31575	3.27404	0.0703848	0.450865	up	6	1	0	0	1	0	1	0	0	0	10.6859	9.47834	8.92316	8.92316	9.48822	8.92316	9.49805	8.92316	8.92316	8.92316	chr1	139085882	139110485	+	1_141007062_140982460_-24602|16.44|21|174	PMID:25714049	NM_181347	Dennd1b	exonic	376
chr12:105799651-105820450+	2.18639	9.45299	3.25966	0.0710045	0.450865	up	6	1	0	0	1	0	0	1	0	0	10.6859	9.47834	8.92316	8.92316	9.48822	8.92316	8.92316	9.53126	8.92316	8.92316	chr12	105799650	105820450	+	12_107058660_107037861_-20799|17.68|8|9	PMID:25714049	NM_011112	Papola	exonic	1391
chrX:94098283-94114263-	2.15626	9.60543	3.87254	0.0490826	0.450865	up	0	2	7	2	1	0	1	0	1	0	8.92316	9.87826	11.0461	9.88598	9.48822	8.92316	9.49805	8.92316	9.49515	8.92316	chrX	94098282	94114263	-	mmu_circ_0016408	circBase	NM_001044386	Zfx	exonic	728
chr9:86422841-86440754-	2.11377	9.28038	2.9929	0.0836306	0.450865	up	0	2	4	0	1	0	0	1	0	0	8.92316	9.87826	10.468	8.92316	9.48822	8.92316	8.92316	9.53126	8.92316	8.92316	chr9	86422840	86440754	-	mmu_circ_0001825	circBase	NM_027394	Ube2cbp	exonic	582
chr6:29878529-29896416+	2.10755	9.27289	2.98126	0.0842341	0.450865	up	0	4	1	1	1	0	0	1	0	0	8.92316	10.4479	9.48818	9.48344	9.48822	8.92316	8.92316	9.53126	8.92316	8.92316	chr6	29878528	29896416	+	6_29846416_29828529_-17887|14.97|3|6	PMID:25714049	NM_021414	Ahcyl2	exonic	741
chr9:71515069-71555737-	2.10673	9.27976	2.97724	0.0844439	0.450865	up	1	3	1	1	1	0	0	0	1	0	9.40746	10.191	9.48818	9.48344	9.48822	8.92316	8.92316	8.92316	9.49515	8.92316	chr9	71515068	71555737	-	9_71403544_71362876_-40668|13.23|7|34	PMID:25714049	NM_001033208	Myzap	exonic	779
chr11:104368680-104378826-	2.10438	9.65175	3.7543	0.0526723	0.450865	up	4	3	2	2	1	0	1	0	1	0	10.2992	10.191	9.89315	9.88598	9.48822	8.92316	9.49805	8.92316	9.49515	8.92316	chr11	104368679	104378826	-	mmu_circ_0000330	circBase	NM_001081045	Kansl1	exonic	241
chr17:80445430-80460047-	2.10045	9.6565	3.74532	0.0529561	0.450865	up	3	3	3	3	0	0	0	0	1	1	10.0585	10.191	10.209	10.2004	8.92316	8.92316	8.92316	8.92316	9.49515	9.55928	chr17	80445429	80460047	-	mmu_circ_0000820	circBase	NM_009231	Sos1	exonic	987
chr2:168639070-168639990-	2.09559	9.32506	2.94721	0.0860265	0.450865	up	0	2	0	4	1	0	0	0	0	1	8.92316	9.87826	8.92316	10.4583	9.48822	8.92316	8.92316	8.92316	8.92316	9.55928	chr2	168639069	168639990	-	mmu_circ_0001104	circBase	NM_015731	Atp9a	exonic	167
chr5:23422759-23426829-	2.09064	9.67291	2.95505	0.0856102	0.450865	up	1	0	2	3	1	0	0	1	0	0	9.40746	8.92316	9.89315	10.2004	9.48822	8.92316	8.92316	9.53126	8.92316	8.92316	chr5	23422758	23426829	-		novel	AK017143		intronic	4071
chr8:46103515-46124146-	2.08989	9.20104	2.94429	0.0861819	0.450865	up	2	2	2	1	0	0	0	0	1	0	9.7694	9.87826	9.89315	9.48344	8.92316	8.92316	8.92316	8.92316	9.49515	8.92316	chr8	46103514	46124146	-	mmu_circ_0001672	circBase	NM_207213	Snx25	exonic	662
chr9:72591751-72593360+	2.08208	9.36974	2.91732	0.0876339	0.450865	up	2	3	0	2	0	0	0	0	1	0	9.7694	10.191	8.92316	9.88598	8.92316	8.92316	8.92316	8.92316	9.49515	8.92316	chr9	72591750	72593360	+	mmu_circ_0001804	circBase	NM_001033536	Rfx7	exonic	206
chr1:155958561-155962560-	2.06984	9.21593	2.89224	0.0890075	0.450865	up	3	1	0	0	3	0	0	0	1	0	10.0585	9.47834	8.92316	8.92316	10.2091	8.92316	8.92316	8.92316	9.49515	8.92316	chr1	155958560	155962560	-	mmu_circ_0000095	circBase	NM_001039184	Cep350	exonic	402
chr3:122774553-122795321+	2.06275	9.31987	2.86641	0.090447	0.450865	up	3	2	0	2	0	0	1	0	0	0	10.0585	9.87826	8.92316	9.88598	8.92316	8.92316	9.49805	8.92316	8.92316	8.92316	chr3	122774552	122795321	+	3_122498239_122477471_-20768|19.78|5|6	PMID:25714049	NM_153422	Pde5a	exonic	565
chr13:9720773-9735466-	2.06204	9.42086	2.85605	0.0910311	0.450865	up	2	3	2	0	0	1	0	0	0	0	9.7694	10.191	9.89315	8.92316	8.92316	9.5523	8.92316	8.92316	8.92316	8.92316	chr13	9720772	9735466	-	mmu_circ_0000430	circBase	NM_144516	Zmynd11	exonic	295
chr6:65855949-65901859+	2.06099	9.29244	2.85064	0.0913381	0.450865	up	2	0	2	1	2	0	0	0	0	1	9.7694	8.92316	9.89315	9.48344	9.89321	8.92316	8.92316	8.92316	8.92316	9.55928	chr6	65855948	65901859	+	6_65851853_65805943_-45910|18.70|11|30	PMID:25714049	NM_027547	Prdm5	exonic	1230
chr14:16277799-16294673+	2.05695	9.24382	2.85106	0.0913144	0.450865	up	2	2	2	1	0	1	0	0	0	0	9.7694	9.87826	9.89315	9.48344	8.92316	9.5523	8.92316	8.92316	8.92316	8.92316	chr14	16277798	16294673	+	14_17127187_17110313_-16874|14.00|12|24	PMID:25714049	NM_021504	Ngly1	exonic	953
chr7:132262683-132271001-	2.05014	9.42955	2.82407	0.0928613	0.450865	up	4	0	0	1	2	0	1	0	0	0	10.2992	8.92316	8.92316	9.48344	9.89321	8.92316	9.49805	8.92316	8.92316	8.92316	chr7	132262682	132271001	-	7_139462684_139454366_-8318|20.58|8|10	PMID:25714049	NM_029935	Chst15	exonic	1641
chr1:119741355-119765922-	2.04605	9.2346	2.82765	0.0926543	0.450865	up	3	2	0	0	2	0	0	1	0	0	10.0585	9.87826	8.92316	8.92316	9.89321	8.92316	8.92316	9.53126	8.92316	8.92316	chr1	119741354	119765922	-	1_121662499_121637932_-24567|16.56|21|154	PMID:25714049	NM_019933	Ptpn4	exonic	396
chr2:69047145-69071438+	2.0375	9.53402	3.84571	0.0498738	0.450865	up	3	3	3	5	2	1	0	1	1	0	10.0585	10.191	10.209	10.6771	9.89321	9.5523	8.92316	9.53126	9.49515	8.92316	chr2	69047144	69071438	+	2_68909495_68885202_-24293|19.94|16|153	PMID:25714049	NM_172856	Cers6	exonic	380
chr9:22643745-22679064+	2.03259	9.75016	4.63139	0.0313925	0.450865	up	11	2	3	3	2	0	0	0	4	0	11.3529	9.87826	10.209	10.2004	9.89321	8.92316	8.92316	8.92316	10.4821	8.92316	chr9	22643744	22679064	+	mmu_circ_0001755	circBase	NM_178415	Bbs9	exonic	771
chr5:143412491-143419692+	2.01714	8.95795	5.2741	0.111595	0.450865	up	0	0	0	0	2	0	0	0	0	0	8.92316	8.92316	8.92316	8.92316	9.89321	8.92316	8.92316	8.92316	8.92316	8.92316	chr5	143412490	143419692	+		novel	NM_025841	Kdelr2	exonic	513
chr3:152742489-152785571+	2.01714	8.95795	5.2741	0.111595	0.450865	up	0	0	0	0	2	0	0	0	0	0	8.92316	8.92316	8.92316	8.92316	9.89321	8.92316	8.92316	8.92316	8.92316	8.92316	chr3	152742488	152785571	+		novel	NM_025662	Pigk	sense overlapping	43083
chr11:83351009-83365677+	2.01714	8.95795	5.2741	0.111595	0.450865	up	0	0	0	0	2	0	0	0	0	0	8.92316	8.92316	8.92316	8.92316	9.89321	8.92316	8.92316	8.92316	8.92316	8.92316	chr11	83351008	83365677	+		novel	NM_027915	Ap2b1	sense overlapping	14669
chr1:24614372-24614709-	2.01714	8.95795	5.2741	0.111595	0.450865	up	0	0	0	0	2	0	0	0	0	0	8.92316	8.92316	8.92316	8.92316	9.89321	8.92316	8.92316	8.92316	8.92316	8.92316	chr1	24614371	24614709	-		novel	uc007ams.1	Atpase6	sense overlapping	338
chr9:65120218-65126928+	2.01714	8.95795	5.2741	0.111595	0.450865	up	0	0	0	0	2	0	0	0	0	0	8.92316	8.92316	8.92316	8.92316	9.89321	8.92316	8.92316	8.92316	8.92316	8.92316	chr9	65120217	65126928	+		novel	NM_020043	Igdcc4	exonic	1322
chr15:12387537-12390049-	2.01714	8.95795	5.2741	0.111595	0.450865	up	0	0	0	0	2	0	0	0	0	0	8.92316	8.92316	8.92316	8.92316	9.89321	8.92316	8.92316	8.92316	8.92316	8.92316	chr15	12387536	12390049	-		novel	NM_001081064	Pdzd2	exonic	274
chr8:14082537-14082699-	2.01714	8.95795	5.2741	0.111595	0.450865	up	0	0	0	0	2	0	0	0	0	0	8.92316	8.92316	8.92316	8.92316	9.89321	8.92316	8.92316	8.92316	8.92316	8.92316	chr8	14082536	14082699	-		novel	ENSMUST00000110813	Erich1	intronic	163
chr10:39783143-39806983+	2.01714	8.97636	4.84884	0.111595	0.450865	up	0	0	0	0	2	0	0	0	0	0	8.92316	8.92316	8.92316	8.92316	9.89321	8.92316	8.92316	8.92316	8.92316	8.92316	chr10	39783142	39806983	+	10_39526789_39502949_-23840|19.01|2|2	PMID:25714049	NM_011264	Rev3l	exonic	957
chr6:28724909-28795938+	2.01714	8.95795	5.2741	0.111595	0.450865	up	0	0	0	0	2	0	0	0	0	0	8.92316	8.92316	8.92316	8.92316	9.89321	8.92316	8.92316	8.92316	8.92316	8.92316	chr6	28724908	28795938	+		novel	NM_019776	Snd1	exonic	325
chr2:173695110-173695999+	2.01714	8.97508	4.87728	0.111595	0.450865	up	0	0	0	0	2	0	0	0	0	0	8.92316	8.92316	8.92316	8.92316	9.89321	8.92316	8.92316	8.92316	8.92316	8.92316	chr2	173695109	173695999	+	2_173521500_173520611_-889|18.37|4|6	PMID:25714049	NM_024436	Rab22a	exonic	289
chr8:86631386-86673069+	2.01714	8.97627	4.85073	0.111595	0.450865	up	0	0	0	0	2	0	0	0	0	0	8.92316	8.92316	8.92316	8.92316	9.89321	8.92316	8.92316	8.92316	8.92316	8.92316	chr8	86631385	86673069	+	8_89196968_89155285_-41683|16.85|16|64	PMID:25714049	NM_025827	Lonp2	exonic	1562
chr5:110207556-110218216+	2.01714	8.95795	5.2741	0.111595	0.450865	up	0	0	0	0	2	0	0	0	0	0	8.92316	8.92316	8.92316	8.92316	9.89321	8.92316	8.92316	8.92316	8.92316	8.92316	chr5	110207555	110218216	+	5_110647235_110636575_-10660|16.19|1|3	PMID:25714049	NM_008146	Golga3	exonic	1072
chr2:119425259-119432012-	2.01714	8.95795	5.2741	0.111595	0.450865	up	0	0	0	0	2	0	0	0	0	0	8.92316	8.92316	8.92316	8.92316	9.89321	8.92316	8.92316	8.92316	8.92316	8.92316	chr2	119425258	119432012	-		novel	NM_026574	Ino80	exonic	753
chr8:109854983-109855733+	2.01714	8.95795	5.2741	0.111595	0.450865	up	0	0	0	0	2	0	0	0	0	0	8.92316	8.92316	8.92316	8.92316	9.89321	8.92316	8.92316	8.92316	8.92316	8.92316	chr8	109854982	109855733	+		novel	NM_009677	Ap1g1	exonic	396
chr5:100446524-100451008-	2.01714	8.97627	4.85073	0.111595	0.450865	up	0	0	0	0	2	0	0	0	0	0	8.92316	8.92316	8.92316	8.92316	9.89321	8.92316	8.92316	8.92316	8.92316	8.92316	chr5	100446523	100451008	-		novel	NM_172714	Lin54	exonic	444
chr8:81715201-81743814+	2.01714	8.97653	4.8451	0.111595	0.450865	up	0	0	0	0	2	0	0	0	0	0	8.92316	8.92316	8.92316	8.92316	9.89321	8.92316	8.92316	8.92316	8.92316	8.92316	chr8	81715200	81743814	+	mmu_circ_0015019	circBase	NM_001024617	Inpp4b	exonic	312
chr14:30765963-30787607+	2.01714	8.99196	4.51534	0.111595	0.450865	up	0	0	0	0	2	0	0	0	0	0	8.92316	8.92316	8.92316	8.92316	9.89321	8.92316	8.92316	8.92316	8.92316	8.92316	chr14	30765962	30787607	+	14_31600793_31579149_-21644|14.89|9|10	PMID:25714049	NM_019460	Sfmbt1	exonic	1153
chr17:32211167-32214840-	2.01714	8.95795	5.2741	0.111595	0.450865	up	0	0	0	0	2	0	0	0	0	0	8.92316	8.92316	8.92316	8.92316	9.89321	8.92316	8.92316	8.92316	8.92316	8.92316	chr17	32211166	32214840	-		novel	NM_020508	Brd4	exonic	817
chr16:32386760-32393649+	2.01714	8.95795	5.2741	0.111595	0.450865	up	0	0	0	0	2	0	0	0	0	0	8.92316	8.92316	8.92316	8.92316	9.89321	8.92316	8.92316	8.92316	8.92316	8.92316	chr16	32386759	32393649	+		novel	NM_177633	Ubxn7	sense overlapping	6890
chr6:91070132-91076716-	2.01714	8.95795	5.2741	0.111595	0.450865	up	0	0	0	0	2	0	0	0	0	0	8.92316	8.92316	8.92316	8.92316	9.89321	8.92316	8.92316	8.92316	8.92316	8.92316	chr6	91070131	91076716	-		novel	NM_018815	Nup210	exonic	770
chr4:59690144-59691338+	2.01714	8.97644	4.84697	0.111595	0.450865	up	0	0	0	0	2	0	0	0	0	0	8.92316	8.92316	8.92316	8.92316	9.89321	8.92316	8.92316	8.92316	8.92316	8.92316	chr4	59690143	59691338	+	mmu_circ_0001215	circBase	NM_153158	E130308A19Rik	exonic	1195
chr4:82320474-82330426-	2.01714	8.95795	5.2741	0.111595	0.450865	up	0	0	0	0	2	0	0	0	0	0	8.92316	8.92316	8.92316	8.92316	9.89321	8.92316	8.92316	8.92316	8.92316	8.92316	chr4	82320473	82330426	-		novel	NM_001113209	Nfib	exonic	569
chr7:134753362-134789285+	2.01714	8.95795	5.2741	0.111595	0.450865	up	0	0	0	0	2	0	0	0	0	0	8.92316	8.92316	8.92316	8.92316	9.89321	8.92316	8.92316	8.92316	8.92316	8.92316	chr7	134753361	134789285	+		novel	NM_001033420	Dock1	exonic	1288
chr17:57406834-57420524+	2.01714	8.99509	4.45131	0.111595	0.450865	up	0	0	0	0	2	0	0	0	0	0	8.92316	8.92316	8.92316	8.92316	9.89321	8.92316	8.92316	8.92316	8.92316	8.92316	chr17	57406833	57420524	+	17_57559947_57546257_-13690|14.98|5|6	PMID:25714049	NM_010130	Adgre1	exonic	936
chr2:37545028-37545232+	2.01714	8.95795	5.2741	0.111595	0.450865	up	0	0	0	0	2	0	0	0	0	0	8.92316	8.92316	8.92316	8.92316	9.89321	8.92316	8.92316	8.92316	8.92316	8.92316	chr2	37545027	37545232	+		novel	ENSMUST00000061179	Rabgap1	intronic	205
chr19:16651419-16661125-	2.01714	8.95795	5.2741	0.111595	0.450865	up	0	0	0	0	2	0	0	0	0	0	8.92316	8.92316	8.92316	8.92316	9.89321	8.92316	8.92316	8.92316	8.92316	8.92316	chr19	16651418	16661125	-		novel	NM_173028	Vps13a	exonic	1182
chr13:46611680-46638021+	2.01714	8.95795	5.2741	0.111595	0.450865	up	0	0	0	0	2	0	0	0	0	0	8.92316	8.92316	8.92316	8.92316	9.89321	8.92316	8.92316	8.92316	8.92316	8.92316	chr13	46611679	46638021	+		novel	AK139667		intronic	26342
chr7:112544177-112560069+	2.01714	8.99058	4.54389	0.111595	0.450865	up	0	0	0	0	2	0	0	0	0	0	8.92316	8.92316	8.92316	8.92316	9.89321	8.92316	8.92316	8.92316	8.92316	8.92316	chr7	112544176	112560069	+		novel	NM_020606	Parva	exonic	405
chr8:69912923-69916700-	2.01714	8.97644	4.84697	0.111595	0.450865	up	0	0	0	0	2	0	0	0	0	0	8.92316	8.92316	8.92316	8.92316	9.89321	8.92316	8.92316	8.92316	8.92316	8.92316	chr8	69912922	69916700	-		novel	NM_145596	Gatad2a	exonic	882
chr5:34431132-34466447+	2.01714	8.95795	5.2741	0.111595	0.450865	up	0	0	0	0	2	0	0	0	0	0	8.92316	8.92316	8.92316	8.92316	9.89321	8.92316	8.92316	8.92316	8.92316	8.92316	chr5	34431131	34466447	+	5_34809096_34773781_-35315|14.21|2|2	PMID:25714049	NM_001243123	Fam193a	exonic	3355
chr1:16598346-16598762-	2.01714	8.95795	5.2741	0.111595	0.450865	up	0	0	0	0	2	0	0	0	0	0	8.92316	8.92316	8.92316	8.92316	9.89321	8.92316	8.92316	8.92316	8.92316	8.92316	chr1	16598345	16598762	-		novel	NR_073122	Ube2w	intronic	417
chr17:17377719-17427319+	2.01714	8.95795	5.2741	0.111595	0.450865	up	0	0	0	0	2	0	0	0	0	0	8.92316	8.92316	8.92316	8.92316	9.89321	8.92316	8.92316	8.92316	8.92316	8.92316	chr17	17377718	17427319	+		novel	NM_025681	Lix1	sense overlapping	49601
chr19:41223084-41256340-	2.01714	8.95795	5.2741	0.111595	0.450865	up	0	0	0	0	2	0	0	0	0	0	8.92316	8.92316	8.92316	8.92316	9.89321	8.92316	8.92316	8.92316	8.92316	8.92316	chr19	41223083	41256340	-	19_41330830_41297574_-33256|13.03|3|3	PMID:25714049	NM_133352	Tm9sf3	exonic	1223
chr16:13857377-13869881-	2.01714	8.95795	5.2741	0.111595	0.450865	up	0	0	0	0	2	0	0	0	0	0	8.92316	8.92316	8.92316	8.92316	9.89321	8.92316	8.92316	8.92316	8.92316	8.92316	chr16	13857376	13869881	-		novel	NM_053181	Pdxdc1	exonic	441
chr12:24544271-24556741+	2.01714	8.95795	5.2741	0.111595	0.450865	up	0	0	0	0	2	0	0	0	0	0	8.92316	8.92316	8.92316	8.92316	9.89321	8.92316	8.92316	8.92316	8.92316	8.92316	chr12	24544270	24556741	+		novel	NM_020614	Taf1b	exonic	758
chr6:38570510-38617752+	2.01714	8.95795	5.2741	0.111595	0.450865	up	0	0	0	0	2	0	0	0	0	0	8.92316	8.92316	8.92316	8.92316	9.89321	8.92316	8.92316	8.92316	8.92316	8.92316	chr6	38570509	38617752	+		novel	NM_138680	Luc7l2	sense overlapping	47243
chr2:53153964-53156203-	2.01714	8.97653	4.8451	0.111595	0.450865	up	0	0	0	0	2	0	0	0	0	0	8.92316	8.92316	8.92316	8.92316	9.89321	8.92316	8.92316	8.92316	8.92316	8.92316	chr2	53153963	53156203	-		novel	NM_018785	Prpf40a	sense overlapping	2240
chr11:106241551-106245437+	2.01714	8.95795	5.2741	0.111595	0.450865	up	0	0	0	0	2	0	0	0	0	0	8.92316	8.92316	8.92316	8.92316	9.89321	8.92316	8.92316	8.92316	8.92316	8.92316	chr11	106241550	106245437	+		novel	NM_028074	Ddx42	exonic	615
chr1:128186758-128216552+	2.01714	8.95795	5.2741	0.111595	0.450865	up	0	0	0	0	2	0	0	0	0	0	8.92316	8.92316	8.92316	8.92316	9.89321	8.92316	8.92316	8.92316	8.92316	8.92316	chr1	128186757	128216552	+		novel	NM_181750	R3hdm1	exonic	982
chr13:45735115-45825447-	2.01714	8.95795	5.2741	0.111595	0.450865	up	0	0	0	0	2	0	0	0	0	0	8.92316	8.92316	8.92316	8.92316	9.89321	8.92316	8.92316	8.92316	8.92316	8.92316	chr13	45735114	45825447	-		novel	NM_009124	Atxn1	sense overlapping	90333
chr5:32867974-32878677+	2.01714	8.9747	4.88581	0.111595	0.450865	up	0	0	0	0	2	0	0	0	0	0	8.92316	8.92316	8.92316	8.92316	9.89321	8.92316	8.92316	8.92316	8.92316	8.92316	chr5	32867973	32878677	+		novel	NM_177786	Depdc5	exonic	355
chr17:84974020-85005566+	2.01714	8.95795	5.2741	0.111595	0.450865	up	0	0	0	0	2	0	0	0	0	0	8.92316	8.92316	8.92316	8.92316	9.89321	8.92316	8.92316	8.92316	8.92316	8.92316	chr17	84974019	85005566	+		novel	uc008dtj.2	Ppm1b	exonic	1250
chr10:28314227-28314527+	2.01714	8.95795	5.2741	0.111595	0.450865	up	0	0	0	0	2	0	0	0	0	0	8.92316	8.92316	8.92316	8.92316	9.89321	8.92316	8.92316	8.92316	8.92316	8.92316	chr10	28314226	28314527	+		novel	ENSMUST00000166468	Ptprk	intronic	301
chr3:122774553-122804609+	2.01714	8.99318	4.49036	0.111595	0.450865	up	0	0	0	0	2	0	0	0	0	0	8.92316	8.92316	8.92316	8.92316	9.89321	8.92316	8.92316	8.92316	8.92316	8.92316	chr3	122774552	122804609	+		novel	NM_153422	Pde5a	exonic	801
chr11:62366964-62373454-	2.01714	8.95795	5.2741	0.111595	0.450865	up	0	0	0	0	2	0	0	0	0	0	8.92316	8.92316	8.92316	8.92316	9.89321	8.92316	8.92316	8.92316	8.92316	8.92316	chr11	62366963	62373454	-		novel	NM_011308	Ncor1	exonic	705
chr5:137149446-137149949-	2.01714	8.99251	4.50408	0.111595	0.450865	up	0	0	0	0	2	0	0	0	0	0	8.92316	8.92316	8.92316	8.92316	9.89321	8.92316	8.92316	8.92316	8.92316	8.92316	chr5	137149445	137149949	-		novel			intergenic	504
chr18:6111685-6120320-	2.01714	8.99462	4.4608	0.111595	0.450865	up	0	0	0	0	2	0	0	0	0	0	8.92316	8.92316	8.92316	8.92316	9.89321	8.92316	8.92316	8.92316	8.92316	8.92316	chr18	6111684	6120320	-	18_6120318_6111683_-8635|15.71|2|2	PMID:25714049	ENSMUST00000181989	Arhgap12	intronic	8636
chr14:103282598-103298863-	2.01714	8.95795	5.2741	0.111595	0.450865	up	0	0	0	0	2	0	0	0	0	0	8.92316	8.92316	8.92316	8.92316	9.89321	8.92316	8.92316	8.92316	8.92316	8.92316	chr14	103282597	103298863	-	14_103698080_103681815_-16265|14.51|2|2	PMID:25714049	NM_207215	Mycbp2	exonic	1633
chr13:70787027-70801041-	2.01714	8.95795	5.2741	0.111595	0.450865	up	0	0	0	0	2	0	0	0	0	0	8.92316	8.92316	8.92316	8.92316	9.89321	8.92316	8.92316	8.92316	8.92316	8.92316	chr13	70787026	70801041	-	13_70939919_70925905_-14014|13.86|2|2	PMID:25714049	NM_172053	Adamts16	sense overlapping	14015
chr2:154345866-154350873-	2.01714	8.9764	4.84795	0.111595	0.450865	up	0	0	0	0	2	0	0	0	0	0	8.92316	8.92316	8.92316	8.92316	9.89321	8.92316	8.92316	8.92316	8.92316	8.92316	chr2	154345865	154350873	-		novel	NM_025876	Cdk5rap1	exonic	337
chr6:65067124-65070089+	2.01714	8.95795	5.2741	0.111595	0.450865	up	0	0	0	0	2	0	0	0	0	0	8.92316	8.92316	8.92316	8.92316	9.89321	8.92316	8.92316	8.92316	8.92316	8.92316	chr6	65067123	65070089	+		novel	NM_007958	Smarcad1	sense overlapping	2966
chr17:31622514-31622883-	2.01714	8.99154	4.52395	0.111595	0.450865	up	0	0	0	0	2	0	0	0	0	0	8.92316	8.92316	8.92316	8.92316	9.89321	8.92316	8.92316	8.92316	8.92316	8.92316	chr17	31622513	31622883	-		novel	NM_144855	Cbs	sense overlapping	370
chr4:106413579-106418288+	2.01714	8.95795	5.2741	0.111595	0.450865	up	0	0	0	0	2	0	0	0	0	0	8.92316	8.92316	8.92316	8.92316	9.89321	8.92316	8.92316	8.92316	8.92316	8.92316	chr4	106413578	106418288	+		novel	NM_183225	Usp24	exonic	411
chr11:120781342-120781608-	2.01714	8.95795	5.2741	0.111595	0.450865	up	0	0	0	0	2	0	0	0	0	0	8.92316	8.92316	8.92316	8.92316	9.89321	8.92316	8.92316	8.92316	8.92316	8.92316	chr11	120781341	120781608	-		novel	NM_009053	Rfng	sense overlapping	267
chr5:35945188-35968719+	2.01714	8.95795	5.2741	0.111595	0.450865	up	0	0	0	0	2	0	0	0	0	0	8.92316	8.92316	8.92316	8.92316	9.89321	8.92316	8.92316	8.92316	8.92316	8.92316	chr5	35945187	35968719	+	5_36311368_36287837_-23531|15.67|4|4	PMID:25714049	NM_027373	Afap1	exonic	835
chr17:87290189-87292979+	2.01714	8.95795	5.2741	0.111595	0.450865	up	0	0	0	0	2	0	0	0	0	0	8.92316	8.92316	8.92316	8.92316	9.89321	8.92316	8.92316	8.92316	8.92316	8.92316	chr17	87290188	87292979	+		novel	NM_028639	Ttc7	exonic	333
chr2:14293028-14293347+	2.01714	8.95795	5.2741	0.111595	0.450865	up	0	0	0	0	2	0	0	0	0	0	8.92316	8.92316	8.92316	8.92316	9.89321	8.92316	8.92316	8.92316	8.92316	8.92316	chr2	14293027	14293347	+		novel	ENSMUST00000028045	Mrc1	intronic	320
chr14:21287085-21287281+	2.01714	8.95795	5.2741	0.111595	0.450865	up	0	0	0	0	2	0	0	0	0	0	8.92316	8.92316	8.92316	8.92316	9.89321	8.92316	8.92316	8.92316	8.92316	8.92316	chr14	21287084	21287281	+		novel	ENSMUST00000045376	Adk	intronic	197
chr6:17819250-17886118+	2.01714	8.95795	5.2741	0.111595	0.450865	up	0	0	0	0	2	0	0	0	0	0	8.92316	8.92316	8.92316	8.92316	9.89321	8.92316	8.92316	8.92316	8.92316	8.92316	chr6	17819249	17886118	+	6_17836118_17769250_-66868|21.35|3|3	PMID:25714049	NM_022332	St7	exonic	927
chr13:76756986-76806262+	2.01714	8.95795	5.2741	0.111595	0.450865	up	0	0	0	0	2	0	0	0	0	0	8.92316	8.92316	8.92316	8.92316	9.89321	8.92316	8.92316	8.92316	8.92316	8.92316	chr13	76756985	76806262	+	13_76945523_76896247_-49276|11.34|14|48	PMID:25714049	NM_030174	Mctp1	exonic	583
chr15:99819494-99826837-	2.01714	8.97527	4.873	0.111595	0.450865	up	0	0	0	0	2	0	0	0	0	0	8.92316	8.92316	8.92316	8.92316	9.89321	8.92316	8.92316	8.92316	8.92316	8.92316	chr15	99819493	99826837	-	15_99657268_99649925_-7343|20.76|5|9	PMID:25714049	NM_001113545	Lima1	exonic	511
chr12:101873323-101889791-	2.01714	8.95795	5.2741	0.111595	0.450865	up	0	0	0	0	2	0	0	0	0	0	8.92316	8.92316	8.92316	8.92316	9.89321	8.92316	8.92316	8.92316	8.92316	8.92316	chr12	101873322	101889791	-		novel	NM_028446	Trip11	exonic	3820
chr10:121374358-121392841+	2.01714	8.95795	5.2741	0.111595	0.450865	up	0	0	0	0	2	0	0	0	0	0	8.92316	8.92316	8.92316	8.92316	9.89321	8.92316	8.92316	8.92316	8.92316	8.92316	chr10	121374357	121392841	+		novel	NM_029364	Gns	exonic	1328
chr7:89509251-89509533-	2.01714	8.95795	5.2741	0.111595	0.450865	up	0	0	0	0	2	0	0	0	0	0	8.92316	8.92316	8.92316	8.92316	9.89321	8.92316	8.92316	8.92316	8.92316	8.92316	chr7	89509250	89509533	-		novel	NM_029614	Prss23	sense overlapping	283
chr14:11793417-11793609+	2.01714	8.95795	5.2741	0.111595	0.450865	up	0	0	0	0	2	0	0	0	0	0	8.92316	8.92316	8.92316	8.92316	9.89321	8.92316	8.92316	8.92316	8.92316	8.92316	chr14	11793416	11793609	+		novel	ENSMUST00000022264	Ptprg	intronic	193
chr16:22401672-22412974-	2.01714	8.95795	5.2741	0.111595	0.450865	up	0	0	0	0	2	0	0	0	0	0	8.92316	8.92316	8.92316	8.92316	9.89321	8.92316	8.92316	8.92316	8.92316	8.92316	chr16	22401671	22412974	-		novel	NM_023794	Etv5	exonic	678
chr9:117998792-118014248-	2.01714	8.95795	5.2741	0.111595	0.450865	up	0	0	0	0	2	0	0	0	0	0	8.92316	8.92316	8.92316	8.92316	9.89321	8.92316	8.92316	8.92316	8.92316	8.92316	chr9	117998791	118014248	-	9_117923366_117907910_-15456|20.16|5|6	PMID:25714049	uc009rzf.1	Zcwpw2	sense overlapping	15457
chr19:47615196-47625484+	2.01714	8.97491	4.88111	0.111595	0.450865	up	0	0	0	0	2	0	0	0	0	0	8.92316	8.92316	8.92316	8.92316	9.89321	8.92316	8.92316	8.92316	8.92316	8.92316	chr19	47615195	47625484	+	19_47699974_47689686_-10288|14.54|5|5	PMID:25714049	NM_009289	Slk	exonic	2264
chr4:131974684-131991286-	2.01714	8.97636	4.84883	0.111595	0.450865	up	0	0	0	0	2	0	0	0	0	0	8.92316	8.92316	8.92316	8.92316	9.89321	8.92316	8.92316	8.92316	8.92316	8.92316	chr4	131974683	131991286	-	4_131547201_131530599_-16602|16.77|2|2	PMID:25714049	NM_183428	Epb4.1	exonic	807
chr7:68169897-68173375+	2.01714	8.95795	5.2741	0.111595	0.450865	up	0	0	0	0	2	0	0	0	0	0	8.92316	8.92316	8.92316	8.92316	9.89321	8.92316	8.92316	8.92316	8.92316	8.92316	chr7	68169896	68173375	+	7_75318261_75314783_-3478|10.34|4|5	PMID:25714049	NM_010513	Igf1r	exonic	297
chr2:80530158-80545146-	2.01714	8.95795	5.2741	0.111595	0.450865	up	0	0	0	0	2	0	0	0	0	0	8.92316	8.92316	8.92316	8.92316	9.89321	8.92316	8.92316	8.92316	8.92316	8.92316	chr2	80530157	80545146	-	2_80385303_80370315_-14988|14.08|2|2	PMID:25714049	NM_016965	Nckap1	exonic	838
chr17:80273025-80274958-	2.01714	8.95795	5.2741	0.111595	0.450865	up	0	0	0	0	2	0	0	0	0	0	8.92316	8.92316	8.92316	8.92316	9.89321	8.92316	8.92316	8.92316	8.92316	8.92316	chr17	80273024	80274958	-		novel	NM_198942	Dhx57	sense overlapping	1934
chr11:106804993-106806429+	2.01714	8.95795	5.2741	0.111595	0.450865	up	0	0	0	0	2	0	0	0	0	0	8.92316	8.92316	8.92316	8.92316	9.89321	8.92316	8.92316	8.92316	8.92316	8.92316	chr11	106804992	106806429	+		novel	NM_177088	Cep95	exonic	323
chr16:55812635-55819706-	2.01714	8.97462	4.88754	0.111595	0.450865	up	0	0	0	0	2	0	0	0	0	0	8.92316	8.92316	8.92316	8.92316	9.89321	8.92316	8.92316	8.92316	8.92316	8.92316	chr16	55812634	55819706	-	16_55819819_55812748_-7071|15.42|5|7	PMID:25714049	NM_030612	Nfkbiz	sense overlapping	7072
chrM:1680-1844+	2.01714	8.97963	4.77693	0.111595	0.450865	up	0	0	0	0	2	0	0	0	0	0	8.92316	8.92316	8.92316	8.92316	9.89321	8.92316	8.92316	8.92316	8.92316	8.92316	chrM	1679	1844	+		novel	uc009vew.1	AK018753	sense overlapping	165
chr7:102354501-102386201+	2.01714	8.99152	4.52449	0.111595	0.450865	up	0	0	0	0	2	0	0	0	0	0	8.92316	8.92316	8.92316	8.92316	9.89321	8.92316	8.92316	8.92316	8.92316	8.92316	chr7	102354500	102386201	+	7_109534715_109503015_-31700|17.66|5|10	PMID:25714049	NM_009287	Stim1	exonic	246
chr7:132949613-132973623+	2.01714	8.95795	5.2741	0.111595	0.450865	up	0	0	0	0	2	0	0	0	0	0	8.92316	8.92316	8.92316	8.92316	9.89321	8.92316	8.92316	8.92316	8.92316	8.92316	chr7	132949612	132973623	+		novel	NM_207302	Zranb1	sense overlapping	24011
chr14:86852072-86918864-	2.01714	8.95795	5.2741	0.111595	0.450865	up	0	0	0	0	2	0	0	0	0	0	8.92316	8.92316	8.92316	8.92316	9.89321	8.92316	8.92316	8.92316	8.92316	8.92316	chr14	86852071	86918864	-	14_87318671_87251879_-66792|16.87|3|9	PMID:25714049	NM_019670	Diap3	exonic	663
chr18:80844527-80918036-	2.01714	8.95795	5.2741	0.111595	0.450865	up	0	0	0	0	2	0	0	0	0	0	8.92316	8.92316	8.92316	8.92316	9.89321	8.92316	8.92316	8.92316	8.92316	8.92316	chr18	80844526	80918036	-		novel	NM_015805	Atp9b	sense overlapping	73510
chr2:179931268-179931548-	2.01714	8.95795	5.2741	0.111595	0.450865	up	0	0	0	0	2	0	0	0	0	0	8.92316	8.92316	8.92316	8.92316	9.89321	8.92316	8.92316	8.92316	8.92316	8.92316	chr2	179931267	179931548	-		novel	ENSMUST00000041618	Taf4a	intronic	281
chr7:46005120-46005640-	2.01714	8.97497	4.8796	0.111595	0.450865	up	0	0	0	0	2	0	0	0	0	0	8.92316	8.92316	8.92316	8.92316	9.89321	8.92316	8.92316	8.92316	8.92316	8.92316	chr7	46005119	46005640	-		novel	NM_018795	Abcc6	exonic	351
chrX:164423576-164424938+	2.01714	8.95795	5.2741	0.111595	0.450865	up	0	0	0	0	2	0	0	0	0	0	8.92316	8.92316	8.92316	8.92316	9.89321	8.92316	8.92316	8.92316	8.92316	8.92316	chrX	164423575	164424938	+		novel	ENSMUST00000033754	Piga	intronic	1363
chr2:126797662-126799234-	2.01714	8.9948	4.45722	0.111595	0.450865	up	0	0	0	0	2	0	0	0	0	0	8.92316	8.92316	8.92316	8.92316	9.89321	8.92316	8.92316	8.92316	8.92316	8.92316	chr2	126797661	126799234	-	2_126624970_126623398_-1572|17.77|10|12	PMID:25714049	NM_021450	Trpm7	exonic	350
chr5:149703279-149725487+	2.01714	8.95795	5.2741	0.111595	0.450865	up	0	0	0	0	2	0	0	0	0	0	8.92316	8.92316	8.92316	8.92316	9.89321	8.92316	8.92316	8.92316	8.92316	8.92316	chr5	149703278	149725487	+	mmu_circ_0001433	circBase	NM_001081204	B3glct	exonic	227
chr10:91161971-91162326-	2.01714	8.95795	5.2741	0.111595	0.450865	up	0	0	0	0	2	0	0	0	0	0	8.92316	8.92316	8.92316	8.92316	9.89321	8.92316	8.92316	8.92316	8.92316	8.92316	chr10	91161970	91162326	-		novel	ENSMUST00000072239	Tmpo	intronic	356
chr17:50852533-50920603-	2.01714	8.95795	5.2741	0.111595	0.450865	up	0	0	0	0	2	0	0	0	0	0	8.92316	8.92316	8.92316	8.92316	9.89321	8.92316	8.92316	8.92316	8.92316	8.92316	chr17	50852532	50920603	-	17_51059928_50991858_-68070|19.29|9|23	PMID:25714049	NM_028162	Tbc1d5	exonic	633
chr5:137210266-137212142-	2.01714	8.95795	5.2741	0.111595	0.450865	up	0	0	0	0	2	0	0	0	0	0	8.92316	8.92316	8.92316	8.92316	9.89321	8.92316	8.92316	8.92316	8.92316	8.92316	chr5	137210265	137212142	-		novel	uc029vpk.1	AK153770	exonic	554
chr2:72937405-72937998-	2.01714	8.95795	5.2741	0.111595	0.450865	up	0	0	0	0	2	0	0	0	0	0	8.92316	8.92316	8.92316	8.92316	9.89321	8.92316	8.92316	8.92316	8.92316	8.92316	chr2	72937404	72937998	-		novel	NM_001018042	Sp3	sense overlapping	594
chr11:86730211-86732666-	2.01714	8.95795	5.2741	0.111595	0.450865	up	0	0	0	0	2	0	0	0	0	0	8.92316	8.92316	8.92316	8.92316	9.89321	8.92316	8.92316	8.92316	8.92316	8.92316	chr11	86730210	86732666	-		novel	NM_001003908	Cltc	exonic	450
chr11:62349353-62401267-	2.01714	8.95795	5.2741	0.111595	0.450865	up	0	0	0	0	2	0	0	0	0	0	8.92316	8.92316	8.92316	8.92316	9.89321	8.92316	8.92316	8.92316	8.92316	8.92316	chr11	62349352	62401267	-		novel	NM_001252313	Ncor1	exonic	3002
chr2:58516024-58516300-	2.01714	8.95795	5.2741	0.111595	0.450865	up	0	0	0	0	2	0	0	0	0	0	8.92316	8.92316	8.92316	8.92316	9.89321	8.92316	8.92316	8.92316	8.92316	8.92316	chr2	58516023	58516300	-		novel	NM_007394	Acvr1	exonic	277
chr12:111801249-111801599+	2.01714	8.95795	5.2741	0.111595	0.450865	up	0	0	0	0	2	0	0	0	0	0	8.92316	8.92316	8.92316	8.92316	9.89321	8.92316	8.92316	8.92316	8.92316	8.92316	chr12	111801248	111801599	+		novel	ENSMUST00000084941	Klc1	intronic	351
chr4:141782773-141789073-	2.01714	8.95795	5.2741	0.111595	0.450865	up	0	0	0	0	2	0	0	0	0	0	8.92316	8.92316	8.92316	8.92316	9.89321	8.92316	8.92316	8.92316	8.92316	8.92316	chr4	141782772	141789073	-		novel	NM_172338	Dnajc16	exonic	586
chr2:26584712-26586027+	2.01714	8.99205	4.51359	0.111595	0.450865	up	0	0	0	0	2	0	0	0	0	0	8.92316	8.92316	8.92316	8.92316	9.89321	8.92316	8.92316	8.92316	8.92316	8.92316	chr2	26584711	26586027	+		novel	NM_178444	Egfl7	sense overlapping	1316
chr16:14194698-14205943-	2.01714	8.95795	5.2741	0.111595	0.450865	up	0	0	0	0	2	0	0	0	0	0	8.92316	8.92316	8.92316	8.92316	9.89321	8.92316	8.92316	8.92316	8.92316	8.92316	chr16	14194697	14205943	-		novel	AK002785		intronic	11246
chr9:21738855-21739873+	2.01714	8.95795	5.2741	0.111595	0.450865	up	0	0	0	0	2	0	0	0	0	0	8.92316	8.92316	8.92316	8.92316	9.89321	8.92316	8.92316	8.92316	8.92316	8.92316	chr9	21738854	21739873	+		novel	NM_010700	Ldlr	exonic	523
chr14:16420341-16425465+	2.01714	8.95795	5.2741	0.111595	0.450865	up	0	0	0	0	2	0	0	0	0	0	8.92316	8.92316	8.92316	8.92316	9.89321	8.92316	8.92316	8.92316	8.92316	8.92316	chr14	16420340	16425465	+		novel	NM_009409	Top2b	exonic	700
chr17:27786071-27786268-	2.01714	8.95795	5.2741	0.111595	0.450865	up	0	0	0	0	2	0	0	0	0	0	8.92316	8.92316	8.92316	8.92316	9.89321	8.92316	8.92316	8.92316	8.92316	8.92316	chr17	27786070	27786268	-		novel	NM_001033279	D17Wsu92e	exonic	198
chr1:110908059-110932265-	2.01714	8.99179	4.51879	0.111595	0.450865	up	0	0	0	0	2	0	0	0	0	0	8.92316	8.92316	8.92316	8.92316	9.89321	8.92316	8.92316	8.92316	8.92316	8.92316	chr1	110908058	110932265	-	1_112828842_112804636_-24206|19.62|2|2	PMID:25714049	NM_001081386	Cdh19	exonic	968
chr15:99984917-99987478+	2.01714	8.97498	4.87943	0.111595	0.450865	up	0	0	0	0	2	0	0	0	0	0	8.92316	8.92316	8.92316	8.92316	9.89321	8.92316	8.92316	8.92316	8.92316	8.92316	chr15	99984916	99987478	+		novel	NM_001080948	Larp4	exonic	371
chr9:86522954-86545393+	2.01714	8.95795	5.2741	0.111595	0.450865	up	0	0	0	0	2	0	0	0	0	0	8.92316	8.92316	8.92316	8.92316	9.89321	8.92316	8.92316	8.92316	8.92316	8.92316	chr9	86522953	86545393	+		novel	NM_177208	Dopey1	exonic	1372
chr17:78816232-78831585-	2.01714	8.95795	5.2741	0.111595	0.450865	up	0	0	0	0	2	0	0	0	0	0	8.92316	8.92316	8.92316	8.92316	9.89321	8.92316	8.92316	8.92316	8.92316	8.92316	chr17	78816231	78831585	-		novel	NM_001081179	Heatr5b	exonic	1823
chr11:29707715-29742711+	2.01714	8.95795	5.2741	0.111595	0.450865	up	0	0	0	0	2	0	0	0	0	0	8.92316	8.92316	8.92316	8.92316	9.89321	8.92316	8.92316	8.92316	8.92316	8.92316	chr11	29707714	29742711	+		novel	NM_024226	Rtn4	sense overlapping	34997
chr10:108240105-108252924+	2.01714	8.9948	4.45727	0.111595	0.450865	up	0	0	0	0	2	0	0	0	0	0	8.92316	8.92316	8.92316	8.92316	9.89321	8.92316	8.92316	8.92316	8.92316	8.92316	chr10	108240104	108252924	+	10_107689980_107677161_-12819|20.79|6|7	PMID:25714049	NM_027892	Ppp1r12a	exonic	1031
chr13:105246663-105271039-	2.01714	8.97655	4.84451	0.111595	0.450865	up	0	0	0	0	2	0	0	0	0	0	8.92316	8.92316	8.92316	8.92316	9.89321	8.92316	8.92316	8.92316	8.92316	8.92316	chr13	105246662	105271039	-		novel	NM_027934	Rnf180	exonic	1227
chr10:115294871-115302791-	2.01714	8.97498	4.87941	0.111595	0.450865	up	0	0	0	0	2	0	0	0	0	0	8.92316	8.92316	8.92316	8.92316	9.89321	8.92316	8.92316	8.92316	8.92316	8.92316	chr10	115294870	115302791	-	10_114739847_114731927_-7920|17.70|5|5	PMID:25714049	NM_024454	Rab21	exonic	376
chr12:16940403-16942954+	2.01714	8.95795	5.2741	0.111595	0.450865	up	0	0	0	0	2	0	0	0	0	0	8.92316	8.92316	8.92316	8.92316	9.89321	8.92316	8.92316	8.92316	8.92316	8.92316	chr12	16940402	16942954	+		novel	NM_009072	Rock2	exonic	399
chr13:12420612-12435299-	2.01714	8.95795	5.2741	0.111595	0.450865	up	0	0	0	0	2	0	0	0	0	0	8.92316	8.92316	8.92316	8.92316	9.89321	8.92316	8.92316	8.92316	8.92316	8.92316	chr13	12420611	12435299	-		novel	NM_144835	Heatr1	antisense	14688
chr7:67736801-67759448-	2.01714	8.95795	5.2741	0.111595	0.450865	up	0	0	0	0	2	0	0	0	0	0	8.92316	8.92316	8.92316	8.92316	9.89321	8.92316	8.92316	8.92316	8.92316	8.92316	chr7	67736800	67759448	-		novel	NM_183312	Synm	sense overlapping	22648
chr17:73161823-73188021+	2.01714	8.95795	5.2741	0.111595	0.450865	up	0	0	0	0	2	0	0	0	0	0	8.92316	8.92316	8.92316	8.92316	9.89321	8.92316	8.92316	8.92316	8.92316	8.92316	chr17	73161822	73188021	+	17_73537361_73511163_-26198|21.52|2|2	PMID:25714049	NM_001081071	Lclat1	exonic	515
chr15:32262706-32347316+	2.01714	8.95795	5.2741	0.111595	0.450865	up	0	0	0	0	2	0	0	0	0	0	8.92316	8.92316	8.92316	8.92316	9.89321	8.92316	8.92316	8.92316	8.92316	8.92316	chr15	32262705	32347316	+		novel	NM_009154	Sema5a	sense overlapping	84611
chr16:44198904-44205080+	2.01714	8.99177	4.51928	0.111595	0.450865	up	0	0	0	0	2	0	0	0	0	0	8.92316	8.92316	8.92316	8.92316	9.89321	8.92316	8.92316	8.92316	8.92316	8.92316	chr16	44198903	44205080	+	16_44205193_44199017_-6176|16.94|8|12	PMID:25714049	NM_001029889	Gm608	exonic	344
chr2:5699174-5699351-	2.01714	8.95795	5.2741	0.111595	0.450865	up	0	0	0	0	2	0	0	0	0	0	8.92316	8.92316	8.92316	8.92316	9.89321	8.92316	8.92316	8.92316	8.92316	8.92316	chr2	5699173	5699351	-		novel	ENSMUST00000044009	Camk1d	intronic	178
chr1:44161810-44174375+	2.01714	8.95795	5.2741	0.111595	0.450865	up	0	0	0	0	2	0	0	0	0	0	8.92316	8.92316	8.92316	8.92316	9.89321	8.92316	8.92316	8.92316	8.92316	8.92316	chr1	44161809	44174375	+	mmu_circ_0008743	circBase	NM_011729	Ercc5	exonic	2002
chr19:41238809-41246785-	2.01714	8.95795	5.2741	0.111595	0.450865	up	0	0	0	0	2	0	0	0	0	0	8.92316	8.92316	8.92316	8.92316	9.89321	8.92316	8.92316	8.92316	8.92316	8.92316	chr19	41238808	41246785	-		novel	NM_133352	Tm9sf3	sense overlapping	7977
chr6:87060521-87067779+	2.01714	8.95795	5.2741	0.111595	0.450865	up	0	0	0	0	2	0	0	0	0	0	8.92316	8.92316	8.92316	8.92316	9.89321	8.92316	8.92316	8.92316	8.92316	8.92316	chr6	87060520	87067779	+		novel	NM_013528	Gfpt1	exonic	446
chr1:20347211-20381594-	2.01714	8.97609	4.85486	0.111595	0.450865	up	0	0	0	0	2	0	0	0	0	0	8.92316	8.92316	8.92316	8.92316	9.89321	8.92316	8.92316	8.92316	8.92316	8.92316	chr1	20347210	20381594	-		novel	NM_153179	Pkhd1	exonic	1240
chr5:52166701-52171583-	2.01714	8.95795	5.2741	0.111595	0.450865	up	0	0	0	0	2	0	0	0	0	0	8.92316	8.92316	8.92316	8.92316	9.89321	8.92316	8.92316	8.92316	8.92316	8.92316	chr5	52166700	52171583	-		novel	NM_007839	Dhx15	exonic	547
chr4:136550801-136555305-	2.01714	8.99238	4.50668	0.111595	0.450865	up	0	0	0	0	2	0	0	0	0	0	8.92316	8.92316	8.92316	8.92316	9.89321	8.92316	8.92316	8.92316	8.92316	8.92316	chr4	136550800	136555305	-		novel	NM_133872	Kdm1a	sense overlapping	4505
chr4:98405379-98424494+	2.01714	8.95795	5.2741	0.111595	0.450865	up	0	0	0	0	2	0	0	0	0	0	8.92316	8.92316	8.92316	8.92316	9.89321	8.92316	8.92316	8.92316	8.92316	8.92316	chr4	98405378	98424494	+		novel	NM_172696	Inadl	exonic	1102
chr17:28724744-28737090+	2.01714	8.95795	5.2741	0.111595	0.450865	up	0	0	0	0	2	0	0	0	0	0	8.92316	8.92316	8.92316	8.92316	9.89321	8.92316	8.92316	8.92316	8.92316	8.92316	chr17	28724743	28737090	+	17_28874035_28861689_-12346|17.44|2|2	PMID:25714049	NM_011951	Mapk14	exonic	457
chr15:98076550-98089803-	2.01714	8.95795	5.2741	0.111595	0.450865	up	0	0	0	0	2	0	0	0	0	0	8.92316	8.92316	8.92316	8.92316	9.89321	8.92316	8.92316	8.92316	8.92316	8.92316	chr15	98076549	98089803	-		novel	NM_144851	Senp1	sense overlapping	13254
chr13:93185808-93186476-	2.01714	8.9745	4.89014	0.111595	0.450865	up	0	0	0	0	2	0	0	0	0	0	8.92316	8.92316	8.92316	8.92316	9.89321	8.92316	8.92316	8.92316	8.92316	8.92316	chr13	93185807	93186476	-		novel	NM_133905	Papd4	exonic	264
chr11:99006003-99007295-	2.01714	8.95795	5.2741	0.111595	0.450865	up	0	0	0	0	2	0	0	0	0	0	8.92316	8.92316	8.92316	8.92316	9.89321	8.92316	8.92316	8.92316	8.92316	8.92316	chr11	99006002	99007295	-		novel	NM_011623	Top2a	exonic	386
chr16:56642489-56668393+	2.01714	8.95795	5.2741	0.111595	0.450865	up	0	0	0	0	2	0	0	0	0	0	8.92316	8.92316	8.92316	8.92316	9.89321	8.92316	8.92316	8.92316	8.92316	8.92316	chr16	56642488	56668393	+		novel	NM_178790	Abi3bp	exonic	642
chr3:152446799-152452143+	2.01714	8.99077	4.53994	0.111595	0.450865	up	0	0	0	0	2	0	0	0	0	0	8.92316	8.92316	8.92316	8.92316	9.89321	8.92316	8.92316	8.92316	8.92316	8.92316	chr3	152446798	152452143	+	3_152115107_152109763_-5344|14.82|3|3	PMID:25714049	NM_001080755	Zzz3	exonic	826
chr4:64007348-64007786-	2.01714	8.95795	5.2741	0.111595	0.450865	up	0	0	0	0	2	0	0	0	0	0	8.92316	8.92316	8.92316	8.92316	9.89321	8.92316	8.92316	8.92316	8.92316	8.92316	chr4	64007347	64007786	-		novel	NM_011607	Tnc	sense overlapping	439
chr4:109794768-109861963+	2.01714	8.99476	4.45797	0.111595	0.450865	up	0	0	0	0	2	0	0	0	0	0	8.92316	8.92316	8.92316	8.92316	9.89321	8.92316	8.92316	8.92316	8.92316	8.92316	chr4	109794767	109861963	+		novel	NM_007983	Faf1	exonic	611
chr4:132459491-132459649-	2.01714	8.95795	5.2741	0.111595	0.450865	up	0	0	0	0	2	0	0	0	0	0	8.92316	8.92316	8.92316	8.92316	9.89321	8.92316	8.92316	8.92316	8.92316	8.92316	chr4	132459490	132459649	-		novel	NM_026039	Med18	sense overlapping	159
chr4:126403165-126417399-	2.01714	8.95795	5.2741	0.111595	0.450865	up	0	0	0	0	2	0	0	0	0	0	8.92316	8.92316	8.92316	8.92316	9.89321	8.92316	8.92316	8.92316	8.92316	8.92316	chr4	126403164	126417399	-	4_126094643_126080409_-14234|20.83|2|2	PMID:25714049	NM_153402	Ago3	exonic	639
chr15:98081257-98087133-	2.01714	8.95795	5.2741	0.111595	0.450865	up	0	0	0	0	2	0	0	0	0	0	8.92316	8.92316	8.92316	8.92316	9.89321	8.92316	8.92316	8.92316	8.92316	8.92316	chr15	98081256	98087133	-		novel	NM_144851	Senp1	sense overlapping	5877
chr13:49664054-49672823+	2.01714	8.95795	5.2741	0.111595	0.450865	up	0	0	0	0	2	0	0	0	0	0	8.92316	8.92316	8.92316	8.92316	9.89321	8.92316	8.92316	8.92316	8.92316	8.92316	chr13	49664053	49672823	+		novel	NR_073167	Nol8	exonic	814
chr10:111508169-111508422+	2.01714	8.95795	5.2741	0.111595	0.450865	up	0	0	0	0	2	0	0	0	0	0	8.92316	8.92316	8.92316	8.92316	9.89321	8.92316	8.92316	8.92316	8.92316	8.92316	chr10	111508168	111508422	+		novel	NM_009344	Phlda1	sense overlapping	254
chr5:89135646-89156602+	2.01714	8.95795	5.2741	0.111595	0.450865	up	0	0	0	0	2	0	0	0	0	0	8.92316	8.92316	8.92316	8.92316	9.89321	8.92316	8.92316	8.92316	8.92316	8.92316	chr5	89135645	89156602	+		novel	NM_018760	Slc4a4	exonic	581
chr5:67764864-67769163-	2.01714	8.95795	5.2741	0.111595	0.450865	up	0	0	0	0	2	0	0	0	0	0	8.92316	8.92316	8.92316	8.92316	9.89321	8.92316	8.92316	8.92316	8.92316	8.92316	chr5	67764863	67769163	-		novel	NM_009727	Atp8a1	exonic	406
chr4:126140380-126140753+	2.01714	8.99166	4.52156	0.111595	0.450865	up	0	0	0	0	2	0	0	0	0	0	8.92316	8.92316	8.92316	8.92316	9.89321	8.92316	8.92316	8.92316	8.92316	8.92316	chr4	126140379	126140753	+		novel	NM_028800	Stk40	sense overlapping	374
chr11:106849748-106856264-	2.01714	8.95795	5.2741	0.111595	0.450865	up	0	0	0	0	2	0	0	0	0	0	8.92316	8.92316	8.92316	8.92316	9.89321	8.92316	8.92316	8.92316	8.92316	8.92316	chr11	106849747	106856264	-	11_106717578_106711062_-6516|15.30|2|2	PMID:25714049	NM_025481	Smurf2	exonic	372
chr15:6781657-6790624+	2.01714	8.95795	5.2741	0.111595	0.450865	up	0	0	0	0	2	0	0	0	0	0	8.92316	8.92316	8.92316	8.92316	9.89321	8.92316	8.92316	8.92316	8.92316	8.92316	chr15	6781656	6790624	+		novel	NM_030168	Rictor	exonic	1897
chr6:108666232-108666686+	2.01714	8.95795	5.2741	0.111595	0.450865	up	0	0	0	0	2	0	0	0	0	0	8.92316	8.92316	8.92316	8.92316	9.89321	8.92316	8.92316	8.92316	8.92316	8.92316	chr6	108666231	108666686	+		novel	NM_011498	Bhlhe40	sense overlapping	455
chr12:36168995-36174341+	2.01714	8.95795	5.2741	0.111595	0.450865	up	0	0	0	0	2	0	0	0	0	0	8.92316	8.92316	8.92316	8.92316	9.89321	8.92316	8.92316	8.92316	8.92316	8.92316	chr12	36168994	36174341	+		novel	NM_146033	Ankmy2	sense overlapping	5347
chr16:32027712-32052383-	2.01714	8.99133	4.52832	0.111595	0.450865	up	0	0	0	0	2	0	0	0	0	0	8.92316	8.92316	8.92316	8.92316	9.89321	8.92316	8.92316	8.92316	8.92316	8.92316	chr16	32027711	32052383	-		novel	NM_177326	Pak2	exonic	1174
chr2:69731746-69733233+	2.01714	8.95795	5.2741	0.111595	0.450865	up	0	0	0	0	2	0	0	0	0	0	8.92316	8.92316	8.92316	8.92316	9.89321	8.92316	8.92316	8.92316	8.92316	8.92316	chr2	69731745	69733233	+		novel	NM_001081086	Ppig	exonic	374
chr7:14563292-14609339-	2.01714	8.99336	4.48653	0.111595	0.450865	up	0	0	0	0	2	0	0	0	0	0	8.92316	8.92316	8.92316	8.92316	9.89321	8.92316	8.92316	8.92316	8.92316	8.92316	chr7	14563291	14609339	-	mmu_circ_0014020	circBase	NR_045120	Nlrp5-ps	exonic	1378
chr4:48451926-48452981-	2.01714	8.95795	5.2741	0.111595	0.450865	up	0	0	0	0	2	0	0	0	0	0	8.92316	8.92316	8.92316	8.92316	9.89321	8.92316	8.92316	8.92316	8.92316	8.92316	chr4	48451925	48452981	-	4_48465853_48464798_-1055|17.75|3|6	PMID:25714049	NM_172304	Tex10	exonic	223
chr2:167647673-167647850-	2.01714	8.95795	5.2741	0.111595	0.450865	up	0	0	0	0	2	0	0	0	0	0	8.92316	8.92316	8.92316	8.92316	9.89321	8.92316	8.92316	8.92316	8.92316	8.92316	chr2	167647672	167647850	-		novel	ENSMUST00000006587	Tmem189	intronic	178
chr15:39436997-39478710+	2.01714	8.99488	4.4556	0.111595	0.450865	up	0	0	0	0	2	0	0	0	0	0	8.92316	8.92316	8.92316	8.92316	9.89321	8.92316	8.92316	8.92316	8.92316	8.92316	chr15	39436996	39478710	+	15_39310256_39268543_-41713|18.06|8|31	PMID:25714049	NM_053271	Rims2	exonic	2096
chr12:8678170-8721807+	2.01714	8.95795	5.2741	0.111595	0.450865	up	0	0	0	0	2	0	0	0	0	0	8.92316	8.92316	8.92316	8.92316	9.89321	8.92316	8.92316	8.92316	8.92316	8.92316	chr12	8678169	8721807	+		novel	NM_030723	Pum2	sense overlapping	43638
chr13:119765505-119790287-	2.01714	8.97963	4.77693	0.111595	0.450865	up	0	0	0	0	2	0	0	0	0	0	8.92316	8.92316	8.92316	8.92316	9.89321	8.92316	8.92316	8.92316	8.92316	8.92316	chr13	119765504	119790287	-		novel	NM_028245	Zfp131	sense overlapping	24783
chr12:76097884-76101131+	2.01714	8.95795	5.2741	0.111595	0.450865	up	0	0	0	0	2	0	0	0	0	0	8.92316	8.92316	8.92316	8.92316	9.89321	8.92316	8.92316	8.92316	8.92316	8.92316	chr12	76097883	76101131	+		novel	NM_001005510	Syne2	exonic	618
chr7:110040813-110044485+	2.01714	8.95795	5.2741	0.111595	0.450865	up	0	0	0	0	2	0	0	0	0	0	8.92316	8.92316	8.92316	8.92316	9.89321	8.92316	8.92316	8.92316	8.92316	8.92316	chr7	110040812	110044485	+		novel	NM_181517	Ipo7	exonic	397
chr8:85875634-85896537+	2.01714	8.99316	4.49075	0.111595	0.450865	up	0	0	0	0	2	0	0	0	0	0	8.92316	8.92316	8.92316	8.92316	9.89321	8.92316	8.92316	8.92316	8.92316	8.92316	chr8	85875633	85896537	+	8_88420436_88399533_-20903|18.05|7|8	PMID:25714049	NM_199446	Phkb	exonic	437
chr5:137150256-137151029-	2.01714	8.95795	5.2741	0.111595	0.450865	up	0	0	0	0	2	0	0	0	0	0	8.92316	8.92316	8.92316	8.92316	9.89321	8.92316	8.92316	8.92316	8.92316	8.92316	chr5	137150255	137151029	-		novel			intergenic	774
chr12:116321127-116348314+	2.01714	8.95795	5.2741	0.111595	0.450865	up	0	0	0	0	2	0	0	0	0	0	8.92316	8.92316	8.92316	8.92316	9.89321	8.92316	8.92316	8.92316	8.92316	8.92316	chr12	116321126	116348314	+	12_117586787_117559600_-27187|17.60|6|8	PMID:25714049	NM_028731	Esyt2	exonic	912
chr12:31930720-31937723-	2.01714	8.95795	5.2741	0.111595	0.450865	up	0	0	0	0	2	0	0	0	0	0	8.92316	8.92316	8.92316	8.92316	9.89321	8.92316	8.92316	8.92316	8.92316	8.92316	chr12	31930719	31937723	-		novel	NM_153198	Hbp1	sense overlapping	7004
chr4:150402156-150500051+	2.01714	8.95795	5.2741	0.111595	0.450865	up	0	0	0	0	2	0	0	0	0	0	8.92316	8.92316	8.92316	8.92316	9.89321	8.92316	8.92316	8.92316	8.92316	8.92316	chr4	150402155	150500051	+		novel	NM_001085492	Rere	sense overlapping	97896
chr18:12882196-12893720-	2.01714	8.95795	5.2741	0.111595	0.450865	up	0	0	0	0	2	0	0	0	0	0	8.92316	8.92316	8.92316	8.92316	9.89321	8.92316	8.92316	8.92316	8.92316	8.92316	chr18	12882195	12893720	-		novel	NM_207530	Osbpl1a	sense overlapping	11525
chr13:51652607-51654635+	2.01714	8.97663	4.84275	0.111595	0.450865	up	0	0	0	0	2	0	0	0	0	0	8.92316	8.92316	8.92316	8.92316	9.89321	8.92316	8.92316	8.92316	8.92316	8.92316	chr13	51652606	51654635	+		novel	NM_029279	Secisbp2	exonic	399
chr6:114899802-114900216-	2.01714	8.95795	5.2741	0.111595	0.450865	up	0	0	0	0	2	0	0	0	0	0	8.92316	8.92316	8.92316	8.92316	9.89321	8.92316	8.92316	8.92316	8.92316	8.92316	chr6	114899801	114900216	-		novel	ENSMUST00000032459	Vgll4	intronic	415
chr1:180737413-180737629+	2.01714	8.95795	5.2741	0.111595	0.450865	up	0	0	0	0	2	0	0	0	0	0	8.92316	8.92316	8.92316	8.92316	9.89321	8.92316	8.92316	8.92316	8.92316	8.92316	chr1	180737412	180737629	+		novel	ENSMUST00000027780	Acbd3	intronic	217
chr13:103820278-103824747-	2.01714	8.95795	5.2741	0.111595	0.450865	up	0	0	0	0	2	0	0	0	0	0	8.92316	8.92316	8.92316	8.92316	9.89321	8.92316	8.92316	8.92316	8.92316	8.92316	chr13	103820277	103824747	-		novel	NM_001005868	Erbb2ip	sense overlapping	4470
chr14:20327224-20328989-	2.01714	8.95795	5.2741	0.111595	0.450865	up	0	0	0	0	2	0	0	0	0	0	8.92316	8.92316	8.92316	8.92316	9.89321	8.92316	8.92316	8.92316	8.92316	8.92316	chr14	20327223	20328989	-		novel	NM_027475	Ecd	exonic	362
chr11:52113120-52121051+	2.01714	8.97638	4.84827	0.111595	0.450865	up	0	0	0	0	2	0	0	0	0	0	8.92316	8.92316	8.92316	8.92316	9.89321	8.92316	8.92316	8.92316	8.92316	8.92316	chr11	52113119	52121051	+	11_51934553_51926622_-7931|18.08|8|11	PMID:25714049	NM_019411	Ppp2ca	exonic	755
chr3:104034006-104105847-	2.01714	8.99289	4.49618	0.111595	0.450865	up	0	0	0	0	2	0	0	0	0	0	8.92316	8.92316	8.92316	8.92316	9.89321	8.92316	8.92316	8.92316	8.92316	8.92316	chr3	104034005	104105847	-		novel	NM_133853	Magi3	exonic	2310
chr10:25443799-25443954+	2.01714	8.95795	5.2741	0.111595	0.450865	up	0	0	0	0	2	0	0	0	0	0	8.92316	8.92316	8.92316	8.92316	9.89321	8.92316	8.92316	8.92316	8.92316	8.92316	chr10	25443798	25443954	+		novel	NM_013511	Epb4.1l2	sense overlapping	156
chr18:65638750-65644369+	2.0171	8.99177	4.51922	0.111595	0.450865	up	0	0	1	0	1	0	0	0	0	0	8.92316	8.92316	9.48818	8.92316	9.48822	8.92316	8.92316	8.92316	8.92316	8.92316	chr18	65638749	65644369	+	18_65804023_65798404_-5619|16.23|1|2	PMID:25714049	uc008ffe.2	Zfp532	exonic	359
chr8:109876803-109877083+	2.01707	8.97655	4.84438	0.111595	0.450865	up	0	0	2	0	0	0	0	0	0	0	8.92316	8.92316	9.89315	8.92316	8.92316	8.92316	8.92316	8.92316	8.92316	8.92316	chr8	109876802	109877083	+	8_112400983_112400703_-280|18.66|7|10	PMID:25714049	NM_001122594	Phlpp2	exonic	281
chr10:91077534-91079636-	2.01707	8.95795	5.27396	0.111595	0.450865	up	0	0	2	0	0	0	0	0	0	0	8.92316	8.92316	9.89315	8.92316	8.92316	8.92316	8.92316	8.92316	8.92316	8.92316	chr10	91077533	91079636	-		novel	NM_009684	Apaf1	exonic	388
chr5:150469677-150471610+	2.01707	8.95795	5.27396	0.111595	0.450865	up	0	0	2	0	0	0	0	0	0	0	8.92316	8.92316	9.89315	8.92316	8.92316	8.92316	8.92316	8.92316	8.92316	8.92316	chr5	150469676	150471610	+	5_151274185_151272252_-1933|14.39|13|26	PMID:25714049	NM_172887	Fry	exonic	357
chr9:58888401-58889220-	2.01707	8.95795	5.27396	0.111595	0.450865	up	0	0	2	0	0	0	0	0	0	0	8.92316	8.92316	9.89315	8.92316	8.92316	8.92316	8.92316	8.92316	8.92316	8.92316	chr9	58888400	58889220	-	9_58737027_58736208_-819|18.18|1|2	PMID:25714049	NM_008684	Neo1	exonic	332
chr7:110850996-110851226-	2.01707	8.95795	5.27396	0.111595	0.450865	up	0	0	2	0	0	0	0	0	0	0	8.92316	8.92316	9.89315	8.92316	8.92316	8.92316	8.92316	8.92316	8.92316	8.92316	chr7	110850995	110851226	-		novel	NM_053247	Lyve1	sense overlapping	231
chr11:77573696-77577368-	2.01707	8.95795	5.27396	0.111595	0.450865	up	0	0	2	0	0	0	0	0	0	0	8.92316	8.92316	9.89315	8.92316	8.92316	8.92316	8.92316	8.92316	8.92316	8.92316	chr11	77573695	77577368	-		novel	NM_144825	Taok1	exonic	257
chr1:125411264-125418304-	2.01707	8.99292	4.49554	0.111595	0.450865	up	0	0	2	0	0	0	0	0	0	0	8.92316	8.92316	9.89315	8.92316	8.92316	8.92316	8.92316	8.92316	8.92316	8.92316	chr1	125411263	125418304	-		novel	NM_023735	Actr3	exonic	292
chr17:80655254-80655699-	2.01707	8.95795	5.27396	0.111595	0.450865	up	0	0	2	0	0	0	0	0	0	0	8.92316	8.92316	9.89315	8.92316	8.92316	8.92316	8.92316	8.92316	8.92316	8.92316	chr17	80655253	80655699	-		novel	ENSMUST00000025089	Map4k3	intronic	446
chr17:78279973-78315746+	2.01707	8.98726	4.61311	0.111595	0.450865	up	0	0	2	0	0	0	0	0	0	0	8.92316	8.92316	9.89315	8.92316	8.92316	8.92316	8.92316	8.92316	8.92316	8.92316	chr17	78279972	78315746	+	17_78715086_78679313_-35773|18.81|3|3	PMID:25714049	NM_015800	Crim1	exonic	867
chr6:137496565-137496765-	2.01707	8.95795	5.27396	0.111595	0.450865	up	0	0	2	0	0	0	0	0	0	0	8.92316	8.92316	9.89315	8.92316	8.92316	8.92316	8.92316	8.92316	8.92316	8.92316	chr6	137496564	137496765	-		novel	ENSMUST00000058210	Eps8	intronic	201
chr12:79061972-79064575+	2.01707	8.95795	5.27396	0.111595	0.450865	up	0	0	2	0	0	0	0	0	0	0	8.92316	8.92316	9.89315	8.92316	8.92316	8.92316	8.92316	8.92316	8.92316	8.92316	chr12	79061971	79064575	+		novel	NM_181073	Plekhh1	exonic	453
chr10:76714995-76716323-	2.01707	8.95795	5.27396	0.111595	0.450865	up	0	0	2	0	0	0	0	0	0	0	8.92316	8.92316	9.89315	8.92316	8.92316	8.92316	8.92316	8.92316	8.92316	8.92316	chr10	76714994	76716323	-		novel	NM_009933	Col6a1	exonic	189
chr10:128480763-128480950+	2.01707	8.95795	5.27396	0.111595	0.450865	up	0	0	2	0	0	0	0	0	0	0	8.92316	8.92316	9.89315	8.92316	8.92316	8.92316	8.92316	8.92316	8.92316	8.92316	chr10	128480762	128480950	+		novel	NM_198160	Smarcc2	sense overlapping	188
chr10:82709009-82728427+	2.01707	8.95795	5.27396	0.111595	0.450865	up	0	0	2	0	0	0	0	0	0	0	8.92316	8.92316	9.89315	8.92316	8.92316	8.92316	8.92316	8.92316	8.92316	8.92316	chr10	82709008	82728427	+	10_82191172_82171754_-19418|14.13|1|2	PMID:25714049	NM_001081218	Hcfc2	exonic	986
chr5:137150598-137152178-	2.01707	8.95795	5.27396	0.111595	0.450865	up	0	0	2	0	0	0	0	0	0	0	8.92316	8.92316	9.89315	8.92316	8.92316	8.92316	8.92316	8.92316	8.92316	8.92316	chr5	137150597	137152178	-		novel			intergenic	1581
chr12:76576174-76576718+	2.01707	8.95795	5.27396	0.111595	0.450865	up	0	0	2	0	0	0	0	0	0	0	8.92316	8.92316	9.89315	8.92316	8.92316	8.92316	8.92316	8.92316	8.92316	8.92316	chr12	76576173	76576718	+		novel	NM_153804	Plekhg3	sense overlapping	545
chr2:91620001-91620157+	2.01707	8.95795	5.27396	0.111595	0.450865	up	0	0	2	0	0	0	0	0	0	0	8.92316	8.92316	9.89315	8.92316	8.92316	8.92316	8.92316	8.92316	8.92316	8.92316	chr2	91620000	91620157	+		novel	NM_029437	Ckap5	sense overlapping	157
chr13:18848886-18854661+	2.01707	8.95795	5.27396	0.111595	0.450865	up	0	0	2	0	0	0	0	0	0	0	8.92316	8.92316	9.89315	8.92316	8.92316	8.92316	8.92316	8.92316	8.92316	8.92316	chr13	18848885	18854661	+		novel	NM_172120	Vps41	exonic	471
chr14:10321072-10321252-	2.01707	8.97655	4.84438	0.111595	0.450865	up	0	0	2	0	0	0	0	0	0	0	8.92316	8.92316	9.89315	8.92316	8.92316	8.92316	8.92316	8.92316	8.92316	8.92316	chr14	10321071	10321252	-		novel	ENSMUST00000160340	Fhit	intronic	181
chr7:81356894-81372203-	2.01707	8.95795	5.27396	0.111595	0.450865	up	0	0	2	0	0	0	0	0	0	0	8.92316	8.92316	9.89315	8.92316	8.92316	8.92316	8.92316	8.92316	8.92316	8.92316	chr7	81356893	81372203	-		novel	NM_001252525	Cpeb1	exonic	888
chr1:138515625-138561785-	2.01707	8.9749	4.88097	0.111595	0.450865	up	0	0	2	0	0	0	0	0	0	0	8.92316	8.92316	9.89315	8.92316	8.92316	8.92316	8.92316	8.92316	8.92316	8.92316	chr1	138515624	138561785	-		novel	NM_021605	Nek7	exonic	615
chr19:46715189-46725038+	2.01707	8.95795	5.27396	0.111595	0.450865	up	0	0	2	0	0	0	0	0	0	0	8.92316	8.92316	9.89315	8.92316	8.92316	8.92316	8.92316	8.92316	8.92316	8.92316	chr19	46715188	46725038	+		novel	NM_020577	As3mt	exonic	492
chr6:135349404-135349589-	2.01707	8.95795	5.27396	0.111595	0.450865	up	0	0	2	0	0	0	0	0	0	0	8.92316	8.92316	9.89315	8.92316	8.92316	8.92316	8.92316	8.92316	8.92316	8.92316	chr6	135349403	135349589	-		novel	ENSMUST00000115764	Dynlt1-ps1	sense overlapping	186
chrX:144345612-144351913+	2.01707	8.95795	5.27396	0.111595	0.450865	up	0	0	2	0	0	0	0	0	0	0	8.92316	8.92316	9.89315	8.92316	8.92316	8.92316	8.92316	8.92316	8.92316	8.92316	chrX	144345611	144351913	+		novel	NR_037145	Alg13	exonic	906
chr7:120873309-120885937+	2.01707	8.95795	5.27396	0.111595	0.450865	up	0	0	2	0	0	0	0	0	0	0	8.92316	8.92316	9.89315	8.92316	8.92316	8.92316	8.92316	8.92316	8.92316	8.92316	chr7	120873308	120885937	+		novel	NM_007908	Eef2k	exonic	783
chr11:6296952-6316855+	2.01707	8.95795	5.27396	0.111595	0.450865	up	0	0	2	0	0	0	0	0	0	0	8.92316	8.92316	9.89315	8.92316	8.92316	8.92316	8.92316	8.92316	8.92316	8.92316	chr11	6296951	6316855	+		novel	NM_001252283	Ogdh	exonic	531
chr7:116359996-116372962-	2.01707	8.95795	5.27396	0.111595	0.450865	up	0	0	2	0	0	0	0	0	0	0	8.92316	8.92316	9.89315	8.92316	8.92316	8.92316	8.92316	8.92316	8.92316	8.92316	chr7	116359995	116372962	-		novel	NM_011083	Pik3c2a	exonic	1090
chr10:115411720-115428961+	2.01707	8.95795	5.27396	0.111595	0.450865	up	0	0	2	0	0	0	0	0	0	0	8.92316	8.92316	9.89315	8.92316	8.92316	8.92316	8.92316	8.92316	8.92316	8.92316	chr10	115411719	115428961	+		novel	NM_001033261	Zfc3h1	exonic	2810
chr18:35576040-35576683+	2.01707	8.95795	5.27396	0.111595	0.450865	up	0	0	2	0	0	0	0	0	0	0	8.92316	8.92316	9.89315	8.92316	8.92316	8.92316	8.92316	8.92316	8.92316	8.92316	chr18	35576039	35576683	+		novel	ENSMUST00000166793	Matr3	intronic	644
chr18:13933705-13939141-	2.01707	8.97636	4.84871	0.111595	0.450865	up	0	0	2	0	0	0	0	0	0	0	8.92316	8.92316	9.89315	8.92316	8.92316	8.92316	8.92316	8.92316	8.92316	8.92316	chr18	13933704	13939141	-		novel	AK135744		intronic	5437
chr4:86156635-86228054+	2.01707	8.95795	5.27396	0.111595	0.450865	up	0	0	2	0	0	0	0	0	0	0	8.92316	8.92316	9.89315	8.92316	8.92316	8.92316	8.92316	8.92316	8.92316	8.92316	chr4	86156634	86228054	+		novel	NM_029967	Adamtsl1	exonic	709
chr10:12421597-12442093-	2.01707	8.95795	5.27396	0.111595	0.450865	up	0	0	2	0	0	0	0	0	0	0	8.92316	8.92316	9.89315	8.92316	8.92316	8.92316	8.92316	8.92316	8.92316	8.92316	chr10	12421596	12442093	-		novel	NM_011682	Utrn	exonic	574
chr4:41168777-41174127+	2.01707	8.95795	5.27396	0.111595	0.450865	up	0	0	2	0	0	0	0	0	0	0	8.92316	8.92316	9.89315	8.92316	8.92316	8.92316	8.92316	8.92316	8.92316	8.92316	chr4	41168776	41174127	+		novel	NM_026275	Ube2r2	sense overlapping	5351
chr1:151402955-151423605-	2.01707	8.99064	4.54251	0.111595	0.450865	up	0	0	2	0	0	0	0	0	0	0	8.92316	8.92316	9.89315	8.92316	8.92316	8.92316	8.92316	8.92316	8.92316	8.92316	chr1	151402954	151423605	-		novel	NM_025819	Swt1	exonic	1495
chr12:58966980-58973042-	2.01707	8.95795	5.27396	0.111595	0.450865	up	0	0	2	0	0	0	0	0	0	0	8.92316	8.92316	9.89315	8.92316	8.92316	8.92316	8.92316	8.92316	8.92316	8.92316	chr12	58966979	58973042	-		novel	NM_009147	Sec23a	exonic	471
chr6:71600723-71620210-	2.01707	8.95795	5.27396	0.111595	0.450865	up	0	0	2	0	0	0	0	0	0	0	8.92316	8.92316	9.89315	8.92316	8.92316	8.92316	8.92316	8.92316	8.92316	8.92316	chr6	71600722	71620210	-		novel	NM_173001	Kdm3a	exonic	1411
chr1:166146731-166165452+	2.01707	8.95795	5.27396	0.111595	0.450865	up	0	0	2	0	0	0	0	0	0	0	8.92316	8.92316	9.89315	8.92316	8.92316	8.92316	8.92316	8.92316	8.92316	8.92316	chr1	166146730	166165452	+		novel	NM_021610	Gpa33	sense overlapping	18722
chr19:3478278-3496651-	2.01707	8.95795	5.27396	0.111595	0.450865	up	0	0	2	0	0	0	0	0	0	0	8.92316	8.92316	9.89315	8.92316	8.92316	8.92316	8.92316	8.92316	8.92316	8.92316	chr19	3478277	3496651	-		novel	NM_028999	Ppp6r3	exonic	787
chr19:47611902-47615600+	2.01707	8.95795	5.27396	0.111595	0.450865	up	0	0	2	0	0	0	0	0	0	0	8.92316	8.92316	9.89315	8.92316	8.92316	8.92316	8.92316	8.92316	8.92316	8.92316	chr19	47611901	47615600	+		novel	NM_009289	Slk	exonic	418
chr7:132241417-132271001-	2.01707	8.95795	5.27396	0.111595	0.450865	up	0	0	2	0	0	0	0	0	0	0	8.92316	8.92316	9.89315	8.92316	8.92316	8.92316	8.92316	8.92316	8.92316	8.92316	chr7	132241416	132271001	-		novel	NM_029935	Chst15	exonic	1946
chr2:33273561-33324703-	2.01707	8.95795	5.27396	0.111595	0.450865	up	0	0	2	0	0	0	0	0	0	0	8.92316	8.92316	9.89315	8.92316	8.92316	8.92316	8.92316	8.92316	8.92316	8.92316	chr2	33273560	33324703	-	mmu_circ_0001005	circBase	NM_175211	Ralgps1	exonic	318
chr11:69409020-69409240-	2.01707	8.97659	4.84363	0.111595	0.450865	up	0	0	2	0	0	0	0	0	0	0	8.92316	8.92316	9.89315	8.92316	8.92316	8.92316	8.92316	8.92316	8.92316	8.92316	chr11	69409019	69409240	-		novel	ENSMUST00000094077	Kdm6b	intronic	221
chr10:14131985-14132287+	2.01707	8.95795	5.27396	0.111595	0.450865	up	0	0	2	0	0	0	0	0	0	0	8.92316	8.92316	9.89315	8.92316	8.92316	8.92316	8.92316	8.92316	8.92316	8.92316	chr10	14131984	14132287	+		novel	NM_010437	Hivep2	sense overlapping	303
chr1:37462892-37466583-	2.01707	8.95795	5.27396	0.111595	0.450865	up	0	0	2	0	0	0	0	0	0	0	8.92316	8.92316	9.89315	8.92316	8.92316	8.92316	8.92316	8.92316	8.92316	8.92316	chr1	37462891	37466583	-		novel	NM_173870	Mgat4a	exonic	237
chr8:83319414-83331258-	2.01707	8.95795	5.27396	0.111595	0.450865	up	0	0	2	0	0	0	0	0	0	0	8.92316	8.92316	9.89315	8.92316	8.92316	8.92316	8.92316	8.92316	8.92316	8.92316	chr8	83319413	83331258	-	8_85855157_85843313_-11844|18.59|4|4	PMID:25714049	NM_178736	Elmod2	exonic	539
chr9:37091844-37092266-	2.01707	8.95795	5.27396	0.111595	0.450865	up	0	0	2	0	0	0	0	0	0	0	8.92316	8.92316	9.89315	8.92316	8.92316	8.92316	8.92316	8.92316	8.92316	8.92316	chr9	37091843	37092266	-		novel	ENSMUST00000039674	Pknox2	intronic	423
chr15:25903356-25903559+	2.01707	8.97508	4.87715	0.111595	0.450865	up	0	0	2	0	0	0	0	0	0	0	8.92316	8.92316	9.89315	8.92316	8.92316	8.92316	8.92316	8.92316	8.92316	8.92316	chr15	25903355	25903559	+		novel	ENSMUST00000022881	Fam134b	intronic	204
chr3:9752413-9787320-	2.01707	8.95795	5.27396	0.111595	0.450865	up	0	0	2	0	0	0	0	0	0	0	8.92316	8.92316	9.89315	8.92316	8.92316	8.92316	8.92316	8.92316	8.92316	8.92316	chr3	9752412	9787320	-		novel	NM_001195031	Pag1	exonic	133
chr5:137149567-137152587-	2.01707	8.99326	4.48852	0.111595	0.450865	up	0	0	2	0	0	0	0	0	0	0	8.92316	8.92316	9.89315	8.92316	8.92316	8.92316	8.92316	8.92316	8.92316	8.92316	chr5	137149566	137152587	-		novel			intergenic	3021
chr8:70762888-70766609-	2.01707	8.95795	5.27396	0.111595	0.450865	up	0	0	2	0	0	0	0	0	0	0	8.92316	8.92316	9.89315	8.92316	8.92316	8.92316	8.92316	8.92316	8.92316	8.92316	chr8	70762887	70766609	-		novel	NM_023065	Ifi30	sense overlapping	3722
chr15:6569107-6569318+	2.01707	8.95795	5.27396	0.111595	0.450865	up	0	0	2	0	0	0	0	0	0	0	8.92316	8.92316	9.89315	8.92316	8.92316	8.92316	8.92316	8.92316	8.92316	8.92316	chr15	6569106	6569318	+		novel			intergenic	212
chr4:41226280-41229848-	2.01707	8.97653	4.84497	0.111595	0.450865	up	0	0	2	0	0	0	0	0	0	0	8.92316	8.92316	9.89315	8.92316	8.92316	8.92316	8.92316	8.92316	8.92316	8.92316	chr4	41226279	41229848	-	4_41176881_41173313_-3568|13.28|10|15	PMID:25714049	NM_026872	Ubap2	exonic	287
chr6:128672615-128673074+	2.01707	8.95795	5.27396	0.111595	0.450865	up	0	0	2	0	0	0	0	0	0	0	8.92316	8.92316	9.89315	8.92316	8.92316	8.92316	8.92316	8.92316	8.92316	8.92316	chr6	128672614	128673074	+		novel	ENSMUST00000032518	Clec2h	intronic	460
chr17:27986252-28054756+	2.01707	8.95795	5.27396	0.111595	0.450865	up	0	0	2	0	0	0	0	0	0	0	8.92316	8.92316	9.89315	8.92316	8.92316	8.92316	8.92316	8.92316	8.92316	8.92316	chr17	27986251	28054756	+		novel	NM_181413	Anks1	exonic	2259
chr13:3548863-3560091+	2.01707	8.95795	5.27396	0.111595	0.450865	up	0	0	2	0	0	0	0	0	0	0	8.92316	8.92316	9.89315	8.92316	8.92316	8.92316	8.92316	8.92316	8.92316	8.92316	chr13	3548862	3560091	+		novel	NM_008112	Gdi2	exonic	774
chrX:151806720-151840983+	2.01707	8.95795	5.27396	0.111595	0.450865	up	0	0	2	0	0	0	0	0	0	0	8.92316	8.92316	9.89315	8.92316	8.92316	8.92316	8.92316	8.92316	8.92316	8.92316	chrX	151806719	151840983	+		novel	NM_021523	Huwe1	exonic	516
chr4:80932686-80936481+	2.01707	8.95795	5.27396	0.111595	0.450865	up	0	0	2	0	0	0	0	0	0	0	8.92316	8.92316	9.89315	8.92316	8.92316	8.92316	8.92316	8.92316	8.92316	8.92316	chr4	80932685	80936481	+		novel	ENSMUST00000055922	Lurap1l	intronic	3796
chr8:119401481-119407705+	2.01707	8.95795	5.27396	0.111595	0.450865	up	0	0	2	0	0	0	0	0	0	0	8.92316	8.92316	9.89315	8.92316	8.92316	8.92316	8.92316	8.92316	8.92316	8.92316	chr8	119401480	119407705	+		novel	NM_019966	Mlycd	exonic	420
chr3:9429311-9429650-	2.01707	8.95795	5.27396	0.111595	0.450865	up	0	0	2	0	0	0	0	0	0	0	8.92316	8.92316	9.89315	8.92316	8.92316	8.92316	8.92316	8.92316	8.92316	8.92316	chr3	9429310	9429650	-		novel	NM_133218	Zfp704	sense overlapping	340
chr19:3490774-3544255-	2.01707	8.99086	4.53806	0.111595	0.450865	up	0	0	2	0	0	0	0	0	0	0	8.92316	8.92316	9.89315	8.92316	8.92316	8.92316	8.92316	8.92316	8.92316	8.92316	chr19	3490773	3544255	-	19_3544255_3490774_-53481|20.65|2|2	PMID:25714049	NM_028999	Ppp6r3	exonic	1497
chr18:80229550-80233503-	2.01707	8.95795	5.27396	0.111595	0.450865	up	0	0	2	0	0	0	0	0	0	0	8.92316	8.92316	9.89315	8.92316	8.92316	8.92316	8.92316	8.92316	8.92316	8.92316	chr18	80229549	80233503	-		novel	NM_001136181	Hsbp1l1	sense overlapping	3954
chr2:157788992-157836691+	2.01707	8.95795	5.27396	0.111595	0.450865	up	0	0	2	0	0	0	0	0	0	0	8.92316	8.92316	9.89315	8.92316	8.92316	8.92316	8.92316	8.92316	8.92316	8.92316	chr2	157788991	157836691	+		novel	NM_025680	Ctnnbl1	exonic	887
chr4:65196771-65237931+	2.01707	8.95795	5.27396	0.111595	0.450865	up	0	0	2	0	0	0	0	0	0	0	8.92316	8.92316	9.89315	8.92316	8.92316	8.92316	8.92316	8.92316	8.92316	8.92316	chr4	65196770	65237931	+		novel	NM_021362	Pappa	exonic	842
chr2:91885601-91900637+	2.01707	8.95795	5.27396	0.111595	0.450865	up	0	0	2	0	0	0	0	0	0	0	8.92316	8.92316	9.89315	8.92316	8.92316	8.92316	8.92316	8.92316	8.92316	8.92316	chr2	91885600	91900637	+		novel	NM_172669	Ambra1	exonic	484
chr8:27156227-27162785-	2.01707	8.95795	5.27396	0.111595	0.450865	up	0	0	2	0	0	0	0	0	0	0	8.92316	8.92316	9.89315	8.92316	8.92316	8.92316	8.92316	8.92316	8.92316	8.92316	chr8	27156226	27162785	-		novel	NM_029423	Rab11fip1	sense overlapping	6559
chr10:115849343-115849493+	2.01707	8.95795	5.27396	0.111595	0.450865	up	0	0	2	0	0	0	0	0	0	0	8.92316	8.92316	9.89315	8.92316	8.92316	8.92316	8.92316	8.92316	8.92316	8.92316	chr10	115849342	115849493	+		novel	NM_146010	Tspan8	sense overlapping	151
chr18:82618743-82624486-	2.01707	8.97644	4.84684	0.111595	0.450865	up	0	0	2	0	0	0	0	0	0	0	8.92316	8.92316	9.89315	8.92316	8.92316	8.92316	8.92316	8.92316	8.92316	8.92316	chr18	82618742	82624486	-	18_82793878_82788135_-5743|19.26|2|2	PMID:25714049	NM_177832	Zfp236	exonic	1140
chr11:76076435-76138394-	2.01707	8.95795	5.27396	0.111595	0.450865	up	0	0	2	0	0	0	0	0	0	0	8.92316	8.92316	9.89315	8.92316	8.92316	8.92316	8.92316	8.92316	8.92316	8.92316	chr11	76076434	76138394	-		novel	NM_026664	Vps53	exonic	1581
chr9:99480570-99551619-	2.01707	8.95795	5.27396	0.111595	0.450865	up	0	0	2	0	0	0	0	0	0	0	8.92316	8.92316	9.89315	8.92316	8.92316	8.92316	8.92316	8.92316	8.92316	8.92316	chr9	99480569	99551619	-		novel	NM_028768	Armc8	sense overlapping	71050
chr19:12774820-12790288-	2.01707	8.95795	5.27396	0.111595	0.450865	up	0	0	2	0	0	0	0	0	0	0	8.92316	8.92316	9.89315	8.92316	8.92316	8.92316	8.92316	8.92316	8.92316	8.92316	chr19	12774819	12790288	-		novel	NM_053009	Zfp91	exonic	758
chr7:143168387-143261376+	2.01707	8.95795	5.27396	0.111595	0.450865	up	0	0	2	0	0	0	0	0	0	0	8.92316	8.92316	9.89315	8.92316	8.92316	8.92316	8.92316	8.92316	8.92316	8.92316	chr7	143168386	143261376	+		novel	NM_008434	Kcnq1	sense overlapping	92990
chr16:73897047-73906932-	2.01707	8.95795	5.27396	0.111595	0.450865	up	0	0	2	0	0	0	0	0	0	0	8.92316	8.92316	9.89315	8.92316	8.92316	8.92316	8.92316	8.92316	8.92316	8.92316	chr16	73897046	73906932	-		novel	NM_175549	Robo2	sense overlapping	9886
chr4:11228851-11239462-	2.01707	8.95795	5.27396	0.111595	0.450865	up	0	0	2	0	0	0	0	0	0	0	8.92316	8.92316	9.89315	8.92316	8.92316	8.92316	8.92316	8.92316	8.92316	8.92316	chr4	11228850	11239462	-		novel	NM_178112	Ints8	exonic	780
chr15:31594119-31594449-	2.01707	8.95795	5.27396	0.111595	0.450865	up	0	0	2	0	0	0	0	0	0	0	8.92316	8.92316	9.89315	8.92316	8.92316	8.92316	8.92316	8.92316	8.92316	8.92316	chr15	31594118	31594449	-		novel	NM_007637	Cct5	sense overlapping	331
chr9:35452045-35464228+	2.01707	8.95795	5.27396	0.111595	0.450865	up	0	0	2	0	0	0	0	0	0	0	8.92316	8.92316	9.89315	8.92316	8.92316	8.92316	8.92316	8.92316	8.92316	8.92316	chr9	35452044	35464228	+	9_35271813_35259630_-12183|16.85|3|3	PMID:25714049	uc009otd.1	Cdon	exonic	1339
chr14:120917356-120928545+	2.01707	8.95795	5.27396	0.111595	0.450865	up	0	0	2	0	0	0	0	0	0	0	8.92316	8.92316	9.89315	8.92316	8.92316	8.92316	8.92316	8.92316	8.92316	8.92316	chr14	120917355	120928545	+		novel	NM_023579	Ipo5	exonic	911
chr3:57764257-57769120+	2.01707	8.97496	4.87973	0.111595	0.450865	up	0	0	2	0	0	0	0	0	0	0	8.92316	8.92316	9.89315	8.92316	8.92316	8.92316	8.92316	8.92316	8.92316	8.92316	chr3	57764256	57769120	+		novel	NM_011883	Rnf13	exonic	207
chr9:31329662-31337422+	2.01707	8.97269	4.9306	0.111595	0.450865	up	0	0	2	0	0	0	0	0	0	0	8.92316	8.92316	9.89315	8.92316	8.92316	8.92316	8.92316	8.92316	8.92316	8.92316	chr9	31329661	31337422	+	9_31145007_31137247_-7760|17.91|4|6	PMID:25714049	NM_001080817	Prdm10	exonic	395
chr17:80034046-80038809-	2.01707	8.95795	5.27396	0.111595	0.450865	up	0	0	2	0	0	0	0	0	0	0	8.92316	8.92316	9.89315	8.92316	8.92316	8.92316	8.92316	8.92316	8.92316	8.92316	chr17	80034045	80038809	-		novel	NM_144802	Hnrnpll	exonic	542
chr16:97565418-97566017-	2.01707	8.95795	5.27396	0.111595	0.450865	up	0	0	2	0	0	0	0	0	0	0	8.92316	8.92316	9.89315	8.92316	8.92316	8.92316	8.92316	8.92316	8.92316	8.92316	chr16	97565417	97566017	-		novel	NM_015775	Tmprss2	sense overlapping	600
chr15:90952711-90991825-	2.01707	8.95795	5.27396	0.111595	0.450865	up	0	0	2	0	0	0	0	0	0	0	8.92316	8.92316	9.89315	8.92316	8.92316	8.92316	8.92316	8.92316	8.92316	8.92316	chr15	90952710	90991825	-		novel	NM_001109040	Kif21a	exonic	2882
chr6:43272305-43275997+	2.01707	8.95795	5.27396	0.111595	0.450865	up	0	0	2	0	0	0	0	0	0	0	8.92316	8.92316	9.89315	8.92316	8.92316	8.92316	8.92316	8.92316	8.92316	8.92316	chr6	43272304	43275997	+		novel	NM_133674	Arhgef5	exonic	3179
chr2:90735451-90735793+	2.01707	8.95795	5.27396	0.111595	0.450865	up	0	0	2	0	0	0	0	0	0	0	8.92316	8.92316	9.89315	8.92316	8.92316	8.92316	8.92316	8.92316	8.92316	8.92316	chr2	90735450	90735793	+		novel	NM_021512	Nup160	sense overlapping	343
chr8:107155003-107155163+	2.01707	8.95795	5.27396	0.111595	0.450865	up	0	0	2	0	0	0	0	0	0	0	8.92316	8.92316	9.89315	8.92316	8.92316	8.92316	8.92316	8.92316	8.92316	8.92316	chr8	107155002	107155163	+		novel	ENSMUST00000034400	Cyb5b	intronic	161
chr5:69558185-69566504+	2.01707	8.95795	5.27396	0.111595	0.450865	up	0	0	2	0	0	0	0	0	0	0	8.92316	8.92316	9.89315	8.92316	8.92316	8.92316	8.92316	8.92316	8.92316	8.92316	chr5	69558184	69566504	+		novel	NM_172711	Guf1	exonic	1314
chr6:83379872-83404824-	2.01707	8.95795	5.27396	0.111595	0.450865	up	0	0	2	0	0	0	0	0	0	0	8.92316	8.92316	9.89315	8.92316	8.92316	8.92316	8.92316	8.92316	8.92316	8.92316	chr6	83379871	83404824	-		novel	NM_183138	Tet3	exonic	2343
chr14:49012479-49016244-	2.01707	8.95795	5.27396	0.111595	0.450865	up	0	0	2	0	0	0	0	0	0	0	8.92316	8.92316	9.89315	8.92316	8.92316	8.92316	8.92316	8.92316	8.92316	8.92316	chr14	49012478	49016244	-		novel	NM_207214	Exoc5	sense overlapping	3766
chr9:40804463-40804695+	2.01707	8.95795	5.27396	0.111595	0.450865	up	0	0	2	0	0	0	0	0	0	0	8.92316	8.92316	9.89315	8.92316	8.92316	8.92316	8.92316	8.92316	8.92316	8.92316	chr9	40804462	40804695	+		novel	NM_031165	Hspa8	exonic	233
chr11:99003507-99006151-	2.01707	8.95795	5.27396	0.111595	0.450865	up	0	0	2	0	0	0	0	0	0	0	8.92316	8.92316	9.89315	8.92316	8.92316	8.92316	8.92316	8.92316	8.92316	8.92316	chr11	99003506	99006151	-		novel	NM_011623	Top2a	exonic	717
chr5:117986099-117990939+	2.01707	8.95795	5.27396	0.111595	0.450865	up	0	0	2	0	0	0	0	0	0	0	8.92316	8.92316	9.89315	8.92316	8.92316	8.92316	8.92316	8.92316	8.92316	8.92316	chr5	117986098	117990939	+		novel	NM_145564	Fbxo21	exonic	543
chr2:32443351-32443648-	2.01707	8.95795	5.27396	0.111595	0.450865	up	0	0	2	0	0	0	0	0	0	0	8.92316	8.92316	9.89315	8.92316	8.92316	8.92316	8.92316	8.92316	8.92316	8.92316	chr2	32443350	32443648	-		novel	ENSMUST00000028160	Slc25a25	intronic	298
chr15:81600908-81616863+	2.01707	8.99166	4.52144	0.111595	0.450865	up	0	0	2	0	0	0	0	0	0	0	8.92316	8.92316	9.89315	8.92316	8.92316	8.92316	8.92316	8.92316	8.92316	8.92316	chr15	81600907	81616863	+	15_81447293_81431338_-15955|19.77|8|15	PMID:25714049	NM_177821	Ep300	exonic	1669
chr12:110561298-110570768+	2.01707	8.97963	4.7768	0.111595	0.450865	up	0	0	2	0	0	0	0	0	0	0	8.92316	8.92316	9.89315	8.92316	8.92316	8.92316	8.92316	8.92316	8.92316	8.92316	chr12	110561297	110570768	+	12_111808978_111799508_-9470|17.20|2|2	PMID:25714049	NM_012023	Ppp2r5c	exonic	474
chr5:124447214-124451373+	2.01707	8.95795	5.27396	0.111595	0.450865	up	0	0	2	0	0	0	0	0	0	0	8.92316	8.92316	9.89315	8.92316	8.92316	8.92316	8.92316	8.92316	8.92316	8.92316	chr5	124447213	124451373	+		novel	NM_030241	Setd8	exonic	465
chr13:100035084-100046839-	2.01707	8.95795	5.27396	0.111595	0.450865	up	0	0	2	0	0	0	0	0	0	0	8.92316	8.92316	9.89315	8.92316	8.92316	8.92316	8.92316	8.92316	8.92316	8.92316	chr13	100035083	100046839	-		novel	NM_001081061	Bdp1	exonic	1208
chr16:33624554-33649935+	2.01707	8.95795	5.27396	0.111595	0.450865	up	0	0	2	0	0	0	0	0	0	0	8.92316	8.92316	9.89315	8.92316	8.92316	8.92316	8.92316	8.92316	8.92316	8.92316	chr16	33624553	33649935	+		novel	NM_134251	Slc12a8	exonic	838
chr7:67732904-67733560-	2.01707	8.95795	5.27396	0.111595	0.450865	up	0	0	2	0	0	0	0	0	0	0	8.92316	8.92316	9.89315	8.92316	8.92316	8.92316	8.92316	8.92316	8.92316	8.92316	chr7	67732903	67733560	-		novel	NM_183312	Synm	sense overlapping	657
chr11:54929095-54939735-	2.01707	8.97439	4.89242	0.111595	0.450865	up	0	0	2	0	0	0	0	0	0	0	8.92316	8.92316	9.89315	8.92316	8.92316	8.92316	8.92316	8.92316	8.92316	8.92316	chr11	54929094	54939735	-		novel	NM_021327	Tnip1	exonic	749
chr14:63864216-63878188+	2.01707	8.99451	4.46302	0.111595	0.450865	up	0	0	2	0	0	0	0	0	0	0	8.92316	8.92316	9.89315	8.92316	8.92316	8.92316	8.92316	8.92316	8.92316	8.92316	chr14	63864215	63878188	+	14_64497025_64483053_-13972|15.12|13|60	PMID:25714049	NM_028228	Pinx1	exonic	452
chr4:112572921-112573269-	2.01707	8.95795	5.27396	0.111595	0.450865	up	0	0	2	0	0	0	0	0	0	0	8.92316	8.92316	9.89315	8.92316	8.92316	8.92316	8.92316	8.92316	8.92316	8.92316	chr4	112572920	112573269	-		novel	ENSMUST00000106560	Skint2	antisense	349
chr3:98131198-98131434+	2.01707	8.95795	5.27396	0.111595	0.450865	up	0	0	2	0	0	0	0	0	0	0	8.92316	8.92316	9.89315	8.92316	8.92316	8.92316	8.92316	8.92316	8.92316	8.92316	chr3	98131197	98131434	+		novel	NM_010928	Notch2	exonic	237
chr12:109716026-109718499+	2.01707	8.95795	5.27396	0.111595	0.450865	up	0	0	2	0	0	0	0	0	0	0	8.92316	8.92316	9.89315	8.92316	8.92316	8.92316	8.92316	8.92316	8.92316	8.92316	chr12	109716025	109718499	+	mmu_circ_0000416	circBase	NR_030261	Mir543	sense overlapping	2474
chr4:8169596-8221674-	2.01707	8.99048	4.54575	0.111595	0.450865	up	0	0	2	0	0	0	0	0	0	0	8.92316	8.92316	9.89315	8.92316	8.92316	8.92316	8.92316	8.92316	8.92316	8.92316	chr4	8169595	8221674	-	4_8148821_8096743_-52078|13.85|3|3	PMID:25714049	NM_007592	Car8	exonic	616
chr19:9004271-9004496+	2.01707	8.95795	5.27396	0.111595	0.450865	up	0	0	2	0	0	0	0	0	0	0	8.92316	8.92316	9.89315	8.92316	8.92316	8.92316	8.92316	8.92316	8.92316	8.92316	chr19	9004270	9004496	+		novel	ENSMUST00000092955	Ahnak	intronic	226
chr11:43422893-43425681-	2.01707	8.95795	5.27396	0.111595	0.450865	up	0	0	2	0	0	0	0	0	0	0	8.92316	8.92316	9.89315	8.92316	8.92316	8.92316	8.92316	8.92316	8.92316	8.92316	chr11	43422892	43425681	-		novel	NM_001131054	Pttg1	exonic	372
chr11:120404283-120413733-	2.01707	8.95795	5.27396	0.111595	0.450865	up	0	0	2	0	0	0	0	0	0	0	8.92316	8.92316	9.89315	8.92316	8.92316	8.92316	8.92316	8.92316	8.92316	8.92316	chr11	120404282	120413733	-		novel	NM_199469	Nploc4	sense overlapping	9451
chr14:77088379-77092886+	2.01707	8.95795	5.27396	0.111595	0.450865	up	0	0	2	0	0	0	0	0	0	0	8.92316	8.92316	9.89315	8.92316	8.92316	8.92316	8.92316	8.92316	8.92316	8.92316	chr14	77088378	77092886	+		novel	ENSMUST00000095625	Ccdc122	intronic	4508
chr15:99794409-99806571-	2.01707	8.95795	5.27396	0.111595	0.450865	up	0	0	2	0	0	0	0	0	0	0	8.92316	8.92316	9.89315	8.92316	8.92316	8.92316	8.92316	8.92316	8.92316	8.92316	chr15	99794408	99806571	-		novel	NM_023063	Lima1	exonic	419
chr5:45775392-45795358-	2.01707	8.95795	5.27396	0.111595	0.450865	up	0	0	2	0	0	0	0	0	0	0	8.92316	8.92316	9.89315	8.92316	8.92316	8.92316	8.92316	8.92316	8.92316	8.92316	chr5	45775391	45795358	-	5_46186597_46166631_-19966|16.13|14|44	PMID:25714049	NM_172153	Lcorl	exonic	276
chr15:95374728-95385156-	2.01707	8.95795	5.27396	0.111595	0.450865	up	0	0	2	0	0	0	0	0	0	0	8.92316	8.92316	9.89315	8.92316	8.92316	8.92316	8.92316	8.92316	8.92316	8.92316	chr15	95374727	95385156	-	mmu_circ_0000642	circBase	NM_001289653	Nell2	exonic	324
chr7:122121054-122128443-	2.01707	8.95795	5.27396	0.111595	0.450865	up	0	0	2	0	0	0	0	0	0	0	8.92316	8.92316	9.89315	8.92316	8.92316	8.92316	8.92316	8.92316	8.92316	8.92316	chr7	122121053	122128443	-		novel	NM_001081238	Palb2	exonic	2300
chr16:87461965-87464838+	2.01707	8.95795	5.27396	0.111595	0.450865	up	0	0	2	0	0	0	0	0	0	0	8.92316	8.92316	9.89315	8.92316	8.92316	8.92316	8.92316	8.92316	8.92316	8.92316	chr16	87461964	87464838	+		novel	NM_024258	Usp16	exonic	280
chr1:136175138-136175375+	2.01707	8.95795	5.27396	0.111595	0.450865	up	0	0	2	0	0	0	0	0	0	0	8.92316	8.92316	9.89315	8.92316	8.92316	8.92316	8.92316	8.92316	8.92316	8.92316	chr1	136175137	136175375	+		novel	NM_001039472	Kif21b	sense overlapping	238
chr16:56596234-56606193+	2.01707	8.95795	5.27396	0.111595	0.450865	up	0	0	2	0	0	0	0	0	0	0	8.92316	8.92316	9.89315	8.92316	8.92316	8.92316	8.92316	8.92316	8.92316	8.92316	chr16	56596233	56606193	+	16_56606306_56596347_-9959|14.46|1|6	PMID:25714049	NM_178790	Abi3bp	exonic	435
chr18:75080203-75125537+	2.01707	8.95795	5.27396	0.111595	0.450865	up	0	0	2	0	0	0	0	0	0	0	8.92316	8.92316	9.89315	8.92316	8.92316	8.92316	8.92316	8.92316	8.92316	8.92316	chr18	75080202	75125537	+		novel	NM_027727	Dym	exonic	871
chr3:84177632-84210354-	2.01707	8.95795	5.27396	0.111595	0.450865	up	0	0	2	0	0	0	0	0	0	0	8.92316	8.92316	9.89315	8.92316	8.92316	8.92316	8.92316	8.92316	8.92316	8.92316	chr3	84177631	84210354	-	mmu_circ_0010810	circBase	NM_030706	Trim2	exonic	1749
chr7:109704951-109709021+	2.01707	8.95795	5.27396	0.111595	0.450865	up	0	0	2	0	0	0	0	0	0	0	8.92316	8.92316	9.89315	8.92316	8.92316	8.92316	8.92316	8.92316	8.92316	8.92316	chr7	109704950	109709021	+		novel	NM_020616	Akip1	exonic	276
chr11:72645537-72677883+	2.01707	8.95795	5.27396	0.111595	0.450865	up	0	0	2	0	0	0	0	0	0	0	8.92316	8.92316	9.89315	8.92316	8.92316	8.92316	8.92316	8.92316	8.92316	8.92316	chr11	72645536	72677883	+		novel	uc007jze.1	Ube2g1	exonic	496
chr13:55660717-55669849+	2.01707	8.95795	5.27396	0.111595	0.450865	up	0	0	2	0	0	0	0	0	0	0	8.92316	8.92316	9.89315	8.92316	8.92316	8.92316	8.92316	8.92316	8.92316	8.92316	chr13	55660716	55669849	+		novel	NM_001282055	Ddx46	exonic	743
chr3:135455186-135463043+	2.01707	8.95795	5.27396	0.111595	0.450865	up	0	0	2	0	0	0	0	0	0	0	8.92316	8.92316	9.89315	8.92316	8.92316	8.92316	8.92316	8.92316	8.92316	8.92316	chr3	135455185	135463043	+		novel	NM_025356	Ube2d3	exonic	374
chr9:95979058-96052814+	2.01707	8.95795	5.27396	0.111595	0.450865	up	0	0	2	0	0	0	0	0	0	0	8.92316	8.92316	9.89315	8.92316	8.92316	8.92316	8.92316	8.92316	8.92316	8.92316	chr9	95979057	96052814	+		novel	NM_011916	Xrn1	sense overlapping	73757
chrX:140677996-140678711+	2.01707	8.97613	4.8538	0.111595	0.450865	up	0	0	2	0	0	0	0	0	0	0	8.92316	8.92316	9.89315	8.92316	8.92316	8.92316	8.92316	8.92316	8.92316	8.92316	chrX	140677995	140678711	+		novel	uc009uld.1	Mid2	exonic	716
chr2:120990331-121002601+	2.01707	8.95795	5.27396	0.111595	0.450865	up	0	0	2	0	0	0	0	0	0	0	8.92316	8.92316	9.89315	8.92316	8.92316	8.92316	8.92316	8.92316	8.92316	8.92316	chr2	120990330	121002601	+		novel	NM_175285	Tmem62	exonic	620
chr1:105719452-105727988+	2.01707	8.95795	5.27396	0.111595	0.450865	up	0	0	2	0	0	0	0	0	0	0	8.92316	8.92316	9.89315	8.92316	8.92316	8.92316	8.92316	8.92316	8.92316	8.92316	chr1	105719451	105727988	+	1_107624565_107616029_-8536|22.00|2|2	PMID:25714049	NM_029349	2310035C23Rik	exonic	643
chr19:57709221-57709390+	2.01707	8.9745	4.89001	0.111595	0.450865	up	0	0	2	0	0	0	0	0	0	0	8.92316	8.92316	9.89315	8.92316	8.92316	8.92316	8.92316	8.92316	8.92316	8.92316	chr19	57709220	57709390	+		novel	uc008iaj.1	Atrnl1	intronic	170
chr9:59445297-59445568-	2.01707	8.95795	5.27396	0.111595	0.450865	up	0	0	2	0	0	0	0	0	0	0	8.92316	8.92316	9.89315	8.92316	8.92316	8.92316	8.92316	8.92316	8.92316	8.92316	chr9	59445296	59445568	-		novel	ENSMUST00000026264	Arih1	intronic	272
chr1:190808883-190844602-	2.01707	8.95795	5.27396	0.111595	0.450865	up	0	0	2	0	0	0	0	0	0	0	8.92316	8.92316	9.89315	8.92316	8.92316	8.92316	8.92316	8.92316	8.92316	8.92316	chr1	190808882	190844602	-	1_192668481_192632762_-35719|17.74|3|3	PMID:25714049	NM_178775	Rps6kc1	exonic	390
chr2:35148871-35155459+	2.01707	8.95795	5.27396	0.111595	0.450865	up	0	0	2	0	0	0	0	0	0	0	8.92316	8.92316	9.89315	8.92316	8.92316	8.92316	8.92316	8.92316	8.92316	8.92316	chr2	35148870	35155459	+		novel	NM_012018	Cntrl	exonic	1010
chr16:33804580-33808034+	2.01707	8.95795	5.27396	0.111595	0.450865	up	0	0	2	0	0	0	0	0	0	0	8.92316	8.92316	9.89315	8.92316	8.92316	8.92316	8.92316	8.92316	8.92316	8.92316	chr16	33804579	33808034	+		novel	NM_010739	Muc13	exonic	330
chr11:83402985-83404955+	2.01707	8.95795	5.27396	0.111595	0.450865	up	0	0	2	0	0	0	0	0	0	0	8.92316	8.92316	9.89315	8.92316	8.92316	8.92316	8.92316	8.92316	8.92316	8.92316	chr11	83402984	83404955	+		novel	NM_027915	Ap2b1	sense overlapping	1971
chr8:123079414-123083943+	2.01707	8.99326	4.48852	0.111595	0.450865	up	0	0	2	0	0	0	0	0	0	0	8.92316	8.92316	9.89315	8.92316	8.92316	8.92316	8.92316	8.92316	8.92316	8.92316	chr8	123079413	123083943	+		novel	ENSMUST00000127664	Gm20388	intronic	4530
chr15:97790905-97791128-	2.01707	8.95795	5.27396	0.111595	0.450865	up	0	0	2	0	0	0	0	0	0	0	8.92316	8.92316	9.89315	8.92316	8.92316	8.92316	8.92316	8.92316	8.92316	8.92316	chr15	97790904	97791128	-		novel	NM_026353	Slc48a1	antisense	224
chr16:59524861-59550549-	2.01707	8.95795	5.27396	0.111595	0.450865	up	0	0	2	0	0	0	0	0	0	0	8.92316	8.92316	9.89315	8.92316	8.92316	8.92316	8.92316	8.92316	8.92316	8.92316	chr16	59524860	59550549	-		novel	NM_174848	Crybg3	exonic	1113
chr5:124391922-124401067-	2.01707	8.95795	5.27396	0.111595	0.450865	up	0	0	2	0	0	0	0	0	0	0	8.92316	8.92316	9.89315	8.92316	8.92316	8.92316	8.92316	8.92316	8.92316	8.92316	chr5	124391921	124401067	-		novel	NM_001081203	Sbno1	exonic	1364
chr5:117198992-117217240+	2.01707	8.95795	5.27396	0.111595	0.450865	up	0	0	2	0	0	0	0	0	0	0	8.92316	8.92316	9.89315	8.92316	8.92316	8.92316	8.92316	8.92316	8.92316	8.92316	chr5	117198991	117217240	+		novel	NM_183306	Taok3	exonic	699
chr14:120932844-120946218+	2.01707	8.95795	5.27396	0.111595	0.450865	up	0	0	2	0	0	0	0	0	0	0	8.92316	8.92316	9.89315	8.92316	8.92316	8.92316	8.92316	8.92316	8.92316	8.92316	chr14	120932843	120946218	+		novel	NM_023579	Ipo5	exonic	2099
chr3:144825211-144841639-	2.01707	8.95795	5.27396	0.111595	0.450865	up	0	0	2	0	0	0	0	0	0	0	8.92316	8.92316	9.89315	8.92316	8.92316	8.92316	8.92316	8.92316	8.92316	8.92316	chr3	144825210	144841639	-		novel	NM_139148	Clca3b	exonic	1642
chr3:40904886-40923551+	2.01707	8.95795	5.27396	0.111595	0.450865	up	0	0	2	0	0	0	0	0	0	0	8.92316	8.92316	9.89315	8.92316	8.92316	8.92316	8.92316	8.92316	8.92316	8.92316	chr3	40904885	40923551	+		novel	NM_026622	3110057O12Rik	exonic	625
chr11:57653056-57653320+	2.01707	8.95795	5.27396	0.111595	0.450865	up	0	0	2	0	0	0	0	0	0	0	8.92316	8.92316	9.89315	8.92316	8.92316	8.92316	8.92316	8.92316	8.92316	8.92316	chr11	57653055	57653320	+		novel	ENSMUST00000066987	Galnt10	intronic	265
chr9:110097089-110109121-	2.01707	8.95795	5.27396	0.111595	0.450865	up	0	0	2	0	0	0	0	0	0	0	8.92316	8.92316	9.89315	8.92316	8.92316	8.92316	8.92316	8.92316	8.92316	8.92316	chr9	110097088	110109121	-	9_110011625_109999593_-12032|21.81|4|4	PMID:25714049	NM_133347	Dhx30	exonic	338
chr13:92220956-92256802-	2.01707	8.95795	5.27396	0.111595	0.450865	up	0	0	2	0	0	0	0	0	0	0	8.92316	8.92316	9.89315	8.92316	8.92316	8.92316	8.92316	8.92316	8.92316	8.92316	chr13	92220955	92256802	-		novel	NM_010829	Msh3	exonic	695
chr6:119936369-119943866-	2.01707	8.99177	4.51921	0.111595	0.450865	up	0	0	2	0	0	0	0	0	0	0	8.92316	8.92316	9.89315	8.92316	8.92316	8.92316	8.92316	8.92316	8.92316	8.92316	chr6	119936368	119943866	-	6_119893884_119886387_-7497|16.25|2|2	PMID:25714049	NM_198703	Wnk1	exonic	991
chr5:4001405-4014079+	2.01707	8.95795	5.27396	0.111595	0.450865	up	0	0	2	0	0	0	0	0	0	0	8.92316	8.92316	9.89315	8.92316	8.92316	8.92316	8.92316	8.92316	8.92316	8.92316	chr5	4001404	4014079	+		novel	NM_194462	Akap9	exonic	1257
chr5:121534335-121537220-	2.01707	8.95795	5.27396	0.111595	0.450865	up	0	0	2	0	0	0	0	0	0	0	8.92316	8.92316	9.89315	8.92316	8.92316	8.92316	8.92316	8.92316	8.92316	8.92316	chr5	121534334	121537220	-		novel	NM_010765	Mapkapk5	exonic	295
chr1:13357736-13359988-	2.01707	8.97506	4.87759	0.111595	0.450865	up	0	0	2	0	0	0	0	0	0	0	8.92316	8.92316	9.89315	8.92316	8.92316	8.92316	8.92316	8.92316	8.92316	8.92316	chr1	13357735	13359988	-		novel	ENSMUST00000006037	Ncoa2	intronic	2253
chr1:90767522-90778873-	2.01707	8.95795	5.27396	0.111595	0.450865	up	0	0	2	0	0	0	0	0	0	0	8.92316	8.92316	9.89315	8.92316	8.92316	8.92316	8.92316	8.92316	8.92316	8.92316	chr1	90767521	90778873	-		novel	NM_001243008	Col6a3	sense overlapping	11352
chr1:170514615-170534131-	2.01707	8.95795	5.27396	0.111595	0.450865	up	0	0	2	0	0	0	0	0	0	0	8.92316	8.92316	9.89315	8.92316	8.92316	8.92316	8.92316	8.92316	8.92316	8.92316	chr1	170514614	170534131	-		novel	NM_027528	Nos1ap	sense overlapping	19517
chr1:170729319-170736945-	2.01707	8.95795	5.27396	0.111595	0.450865	up	0	0	2	0	0	0	0	0	0	0	8.92316	8.92316	9.89315	8.92316	8.92316	8.92316	8.92316	8.92316	8.92316	8.92316	chr1	170729318	170736945	-		novel	ENSMUST00000027974	Atf6	intronic	7627
chr14:21783679-21793674+	2.01707	8.95795	5.27396	0.111595	0.450865	up	0	0	2	0	0	0	0	0	0	0	8.92316	8.92316	9.89315	8.92316	8.92316	8.92316	8.92316	8.92316	8.92316	8.92316	chr14	21783678	21793674	+	14_22612896_22602901_-9995|18.65|1|2	PMID:25714049	NM_026283	Samd8	sense overlapping	9996
chr17:30116806-30117137+	2.01707	8.95795	5.27396	0.111595	0.450865	up	0	0	2	0	0	0	0	0	0	0	8.92316	8.92316	9.89315	8.92316	8.92316	8.92316	8.92316	8.92316	8.92316	8.92316	chr17	30116805	30117137	+		novel	uc008btr.1	Zfand3	intronic	332
chr6:95566384-95579235-	2.01707	8.95795	5.27396	0.111595	0.450865	up	0	0	2	0	0	0	0	0	0	0	8.92316	8.92316	9.89315	8.92316	8.92316	8.92316	8.92316	8.92316	8.92316	8.92316	chr6	95566383	95579235	-		novel	NM_011507	Suclg2	exonic	402
chr6:23382881-23444038-	2.01707	8.95795	5.27396	0.111595	0.450865	up	0	0	2	0	0	0	0	0	0	0	8.92316	8.92316	9.89315	8.92316	8.92316	8.92316	8.92316	8.92316	8.92316	8.92316	chr6	23382880	23444038	-		novel	NM_153163	Cadps2	exonic	992
chr1:191053421-191053593-	2.01707	8.95795	5.27396	0.111595	0.450865	up	0	0	2	0	0	0	0	0	0	0	8.92316	8.92316	9.89315	8.92316	8.92316	8.92316	8.92316	8.92316	8.92316	8.92316	chr1	191053420	191053593	-		novel	ENSMUST00000027945	Tatdn3	intronic	173
chr7:126104704-126124531-	2.01707	8.95795	5.27396	0.111595	0.450865	up	0	0	2	0	0	0	0	0	0	0	8.92316	8.92316	9.89315	8.92316	8.92316	8.92316	8.92316	8.92316	8.92316	8.92316	chr7	126104703	126124531	-		novel	NM_028816	Xpo6	exonic	1670
chr14:87472076-87480883+	2.01707	8.95795	5.27396	0.111595	0.450865	up	0	0	2	0	0	0	0	0	0	0	8.92316	8.92316	9.89315	8.92316	8.92316	8.92316	8.92316	8.92316	8.92316	8.92316	chr14	87472075	87480883	+		novel	NM_172605	Tdrd3	exonic	525
chr6:7863905-7864141+	2.01707	8.97365	4.90912	0.111595	0.450865	up	0	0	2	0	0	0	0	0	0	0	8.92316	8.92316	9.89315	8.92316	8.92316	8.92316	8.92316	8.92316	8.92316	8.92316	chr6	7863904	7864141	+		novel	NM_052993	C1galt1	exonic	237
chr15:63925555-63926361-	2.01707	8.95795	5.27396	0.111595	0.450865	up	0	0	2	0	0	0	0	0	0	0	8.92316	8.92316	9.89315	8.92316	8.92316	8.92316	8.92316	8.92316	8.92316	8.92316	chr15	63925554	63926361	-		novel			intergenic	807
chr12:21374703-21377515-	2.01707	8.95795	5.27396	0.111595	0.450865	up	0	0	2	0	0	0	0	0	0	0	8.92316	8.92316	9.89315	8.92316	8.92316	8.92316	8.92316	8.92316	8.92316	8.92316	chr12	21374702	21377515	-		novel			intergenic	2813
chr7:144438766-144456495-	2.01707	8.95795	5.27396	0.111595	0.450865	up	0	0	2	0	0	0	0	0	0	0	8.92316	8.92316	9.89315	8.92316	8.92316	8.92316	8.92316	8.92316	8.92316	8.92316	chr7	144438765	144456495	-		novel	NM_007803	Cttn	exonic	1030
chr1:59949053-59982308+	2.01707	8.95795	5.27396	0.111595	0.450865	up	0	0	2	0	0	0	0	0	0	0	8.92316	8.92316	9.89315	8.92316	8.92316	8.92316	8.92316	8.92316	8.92316	8.92316	chr1	59949052	59982308	+	1_60039152_60005897_-33255|15.53|3|5	PMID:25714049	NM_001037725	Fam117b	sense overlapping	33256
chr6:148774977-148800270-	2.01707	8.95795	5.27396	0.111595	0.450865	up	0	0	2	0	0	0	0	0	0	0	8.92316	8.92316	9.89315	8.92316	8.92316	8.92316	8.92316	8.92316	8.92316	8.92316	chr6	148774976	148800270	-		novel	NM_001081113	Ipo8	exonic	1675
chr4:125089875-125090147+	2.01707	8.95795	5.27396	0.111595	0.450865	up	0	0	2	0	0	0	0	0	0	0	8.92316	8.92316	9.89315	8.92316	8.92316	8.92316	8.92316	8.92316	8.92316	8.92316	chr4	125089874	125090147	+	4_124767391_124767119_-272|15.89|10|15	PMID:25714049	NM_027310	Meaf6	exonic	134
chr11:117714126-117723550+	2.01707	8.99488	4.45548	0.111595	0.450865	up	0	0	2	0	0	0	0	0	0	0	8.92316	8.92316	9.89315	8.92316	8.92316	8.92316	8.92316	8.92316	8.92316	8.92316	chr11	117714125	117723550	+	11_117584864_117575440_-9424|18.62|9|14	PMID:25714049	NM_198022	Tnrc6c	exonic	2928
chr2:157175528-157199549-	2.01707	8.97638	4.84814	0.111595	0.450865	up	0	0	2	0	0	0	0	0	0	0	8.92316	8.92316	9.89315	8.92316	8.92316	8.92316	8.92316	8.92316	8.92316	8.92316	chr2	157175527	157199549	-		novel	NM_011249	Rbl1	exonic	1614
chrX:41835110-41864072-	2.01707	8.95795	5.27396	0.111595	0.450865	up	0	0	2	0	0	0	0	0	0	0	8.92316	8.92316	9.89315	8.92316	8.92316	8.92316	8.92316	8.92316	8.92316	8.92316	chrX	41835109	41864072	-		novel	NM_001033422	Thoc2	sense overlapping	28963
chrX:71284601-71307876+	2.01707	8.95795	5.27396	0.111595	0.450865	up	0	0	2	0	0	0	0	0	0	0	8.92316	8.92316	9.89315	8.92316	8.92316	8.92316	8.92316	8.92316	8.92316	8.92316	chrX	71284600	71307876	+		novel	NM_019926	Mtm1	exonic	1200
chrX:150993649-150994422-	2.01707	8.95795	5.27396	0.111595	0.450865	up	0	0	2	0	0	0	0	0	0	0	8.92316	8.92316	9.89315	8.92316	8.92316	8.92316	8.92316	8.92316	8.92316	8.92316	chrX	150993648	150994422	-		novel	NM_198110	Gnl3l	exonic	455
chr7:120181912-120188882+	2.01707	8.95795	5.27396	0.111595	0.450865	up	0	0	2	0	0	0	0	0	0	0	8.92316	8.92316	9.89315	8.92316	8.92316	8.92316	8.92316	8.92316	8.92316	8.92316	chr7	120181911	120188882	+		novel	NM_028085	Anks4b	sense overlapping	6971
chr10:43964578-43966413-	2.01707	8.97498	4.87929	0.111595	0.450865	up	0	0	2	0	0	0	0	0	0	0	8.92316	8.92316	9.89315	8.92316	8.92316	8.92316	8.92316	8.92316	8.92316	8.92316	chr10	43964577	43966413	-		novel	NM_172393	Aim1	exonic	243
chr9:96017751-96026933+	2.01693	9.0045	4.29432	0.111595	0.450865	up	0	0	0	0	2	0	0	0	0	0	8.92316	8.92316	8.92316	8.92316	9.89321	8.92316	8.92316	8.92316	8.92316	8.92316	chr9	96017750	96026933	+	9_95927352_95918170_-9182|12.68|6|7	PMID:25714049	NM_011916	Xrn1	exonic	555
chr6:119920110-119921019+	2.01689	9.00592	4.26333	0.111595	0.450865	up	0	0	0	0	2	0	0	0	0	0	8.92316	8.92316	8.92316	8.92316	9.89321	8.92316	8.92316	8.92316	8.92316	8.92316	chr6	119920109	119921019	+	mmu_circ_0013025	circBase	NM_011236	Rad52	sense overlapping	910
chr7:80911342-80923220-	2.01685	9.0072	4.23566	0.111595	0.450865	up	0	0	0	0	2	0	0	0	0	0	8.92316	8.92316	8.92316	8.92316	9.89321	8.92316	8.92316	8.92316	8.92316	8.92316	chr7	80911341	80923220	-	7_88068106_88056228_-11878|15.84|2|2	PMID:25714049	NM_019951	Sec11a	sense overlapping	11879
chr4:129654865-129656402-	2.01685	9.00742	4.23095	0.111595	0.450865	up	0	0	0	0	2	0	0	0	0	0	8.92316	8.92316	8.92316	8.92316	9.89321	8.92316	8.92316	8.92316	8.92316	8.92316	chr4	129654864	129656402	-		novel	NM_008468	Kpna6	exonic	316
chr18:49912643-49939609+	2.01682	9.00838	4.21022	0.111595	0.450865	up	0	0	0	0	2	0	0	0	0	0	8.92316	8.92316	8.92316	8.92316	9.89321	8.92316	8.92316	8.92316	8.92316	8.92316	chr18	49912642	49939609	+	18_50099263_50072297_-26966|16.53|4|6	PMID:25714049	NM_001081371	Dmxl1	exonic	1116
chr13:99976409-100000316-	2.01679	9.00932	4.19014	0.111595	0.450865	up	0	0	0	0	2	0	0	0	0	0	8.92316	8.92316	8.92316	8.92316	9.89321	8.92316	8.92316	8.92316	8.92316	8.92316	chr13	99976408	100000316	-	13_100770271_100746364_-23907|20.45|1|2	PMID:25714049	NM_030026	Mccc2	exonic	609
chrX:19158816-19166942-	2.01677	9.00985	4.17878	0.111595	0.450865	up	0	0	0	0	2	0	0	0	0	0	8.92316	8.92316	8.92316	8.92316	9.89321	8.92316	8.92316	8.92316	8.92316	8.92316	chrX	19158815	19166942	-	X_18744068_18735942_-8126|17.26|12|23	PMID:25714049	uc009ssq.1	AK170409	sense overlapping	8127
chr1:170849117-170855189-	2.01677	9.00988	4.17808	0.111595	0.450865	up	0	0	0	0	2	0	0	0	0	0	8.92316	8.92316	8.92316	8.92316	9.89321	8.92316	8.92316	8.92316	8.92316	8.92316	chr1	170849116	170855189	-	1_172785320_172779248_-6072|14.28|2|2	PMID:25714049	NM_001081304	Atf6	exonic	266
chr14:30609102-30610310-	2.01676	9.0104	4.16686	0.111595	0.450865	up	0	0	0	0	2	0	0	0	0	0	8.92316	8.92316	8.92316	8.92316	9.89321	8.92316	8.92316	8.92316	8.92316	8.92316	chr14	30609101	30610310	-		novel	NM_011103	Prkcd	exonic	323
chr7:130418448-130467437-	2.01672	9.01171	4.13911	0.111595	0.450865	up	0	0	0	0	2	0	0	0	0	0	8.92316	8.92316	8.92316	8.92316	9.89321	8.92316	8.92316	8.92316	8.92316	8.92316	chr7	130418447	130467437	-	7_137610951_137561962_-48989|19.58|12|15	PMID:25714049	NM_013799	Ate1	exonic	403
chr2:18889052-18908152-	2.0167	9.01229	4.12666	0.111595	0.450865	up	0	0	0	0	2	0	0	0	0	0	8.92316	8.92316	8.92316	8.92316	9.89321	8.92316	8.92316	8.92316	8.92316	8.92316	chr2	18889051	18908152	-	2_18829779_18810679_-19100|18.26|13|19	PMID:25714049	NM_008845	Pip4k2a	exonic	348
chr19:59305158-59327873-	2.01665	9.01161	4.14099	0.111595	0.450865	up	0	0	2	0	0	0	0	0	0	0	8.92316	8.92316	9.89315	8.92316	8.92316	8.92316	8.92316	8.92316	8.92316	8.92316	chr19	59305157	59327873	-	19_59402363_59379648_-22715|17.03|10|15	PMID:25714049	NM_001033222	Pdzd8	exonic	389
chr13:63398083-63403038-	2.01664	9.01179	4.13719	0.111595	0.450865	up	0	0	2	0	0	0	0	0	0	0	8.92316	8.92316	9.89315	8.92316	8.92316	8.92316	8.92316	8.92316	8.92316	8.92316	chr13	63398082	63403038	-	13_63504346_63499391_-4955|18.15|3|3	PMID:25714049	NM_007985	Fancc	exonic	377
chr7:44652431-44665500-	2.01662	9.01257	4.12054	0.111595	0.450865	up	0	0	2	0	0	0	0	0	0	0	8.92316	8.92316	9.89315	8.92316	8.92316	8.92316	8.92316	8.92316	8.92316	8.92316	chr7	44652430	44665500	-		novel	NM_001271540	Myh14	exonic	1105
chr7:116358636-116376559-	2.01537	9.02337	4.10357	0.111595	0.450865	up	0	0	2	0	0	0	0	0	0	0	8.92316	8.92316	9.89315	8.92316	8.92316	8.92316	8.92316	8.92316	8.92316	8.92316	chr7	116358635	116376559	-	7_123520073_123502150_-17923|13.97|17|43	PMID:25714049	NM_011083	Pik3c2a	exonic	1563
chr16:24681746-24762276+	2.01535	9.02353	4.10403	0.111595	0.450865	up	0	0	2	0	0	0	0	0	0	0	8.92316	8.92316	9.89315	8.92316	8.92316	8.92316	8.92316	8.92316	8.92316	8.92316	chr16	24681745	24762276	+		novel	NM_178665	Lpp	exonic	810
chr3:95991444-95992278-	2.01521	9.025	4.1075	0.111595	0.450865	up	0	0	0	0	2	0	0	0	0	0	8.92316	8.92316	8.92316	8.92316	9.89321	8.92316	8.92316	8.92316	8.92316	8.92316	chr3	95991443	95992278	-	mmu_circ_0001150	circBase	NM_023320	Plekho1	exonic	246
chr4:150477364-150510038+	2.01503	9.02621	4.10885	0.111595	0.450865	up	0	0	0	0	2	0	0	0	0	0	8.92316	8.92316	8.92316	8.92316	9.89321	8.92316	8.92316	8.92316	8.92316	8.92316	chr4	150477363	150510038	+	4_149884147_149851473_-32674|19.73|4|5	PMID:25714049	NM_001085492	Rere	exonic	379
chr4:11218612-11223887-	2.01496	9.02642	4.10889	0.111595	0.450865	up	0	0	1	0	1	0	0	0	0	0	8.92316	8.92316	9.48818	8.92316	9.48822	8.92316	8.92316	8.92316	8.92316	8.92316	chr4	11218611	11223887	-		novel	NM_178112	Ints8	exonic	460
chr12:73691548-73702912+	2.01484	9.02704	4.10894	0.111595	0.450865	up	0	0	2	0	0	0	0	0	0	0	8.92316	8.92316	9.89315	8.92316	8.92316	8.92316	8.92316	8.92316	8.92316	8.92316	chr12	73691547	73702912	+	12_74803899_74792535_-11364|13.72|4|4	PMID:25714049	NM_008856	Prkch	exonic	851
chr11:70900472-70908517+	2.0148	9.02783	4.1088	0.111595	0.450865	up	0	0	0	0	2	0	0	0	0	0	8.92316	8.92316	8.92316	8.92316	9.89321	8.92316	8.92316	8.92316	8.92316	8.92316	chr11	70900471	70908517	+	mmu_circ_0000283	circBase	NM_019400	Rabep1	exonic	447
chr15:90568249-90619735-	2.01469	9.02803	4.1085	0.111595	0.450865	up	0	0	2	0	0	0	0	0	0	0	8.92316	8.92316	9.89315	8.92316	8.92316	8.92316	8.92316	8.92316	8.92316	8.92316	chr15	90568248	90619735	-	15_90450166_90398680_-51486|19.11|8|13	PMID:25714049	NM_025815	Cpne8	exonic	536
chr18:13715141-13717747-	2.01465	9.02882	4.10776	0.111595	0.450865	up	0	0	0	0	2	0	0	0	0	0	8.92316	8.92316	8.92316	8.92316	9.89321	8.92316	8.92316	8.92316	8.92316	8.92316	chr18	13715140	13717747	-	18_13876256_13873650_-2606|19.58|9|14	PMID:25714049	NM_145492	Zfp521	exonic	248
chr13:59756793-59758995-	2.01463	9.02895	4.10756	0.111595	0.450865	up	0	0	0	0	2	0	0	0	0	0	8.92316	8.92316	8.92316	8.92316	9.89321	8.92316	8.92316	8.92316	8.92316	8.92316	chr13	59756792	59758995	-		novel	NM_026921	Isca1	sense overlapping	2203
chr10:105303594-105348549-	2.0146	9.02867	4.10782	0.111595	0.450865	up	0	0	2	0	0	0	0	0	0	0	8.92316	8.92316	9.89315	8.92316	8.92316	8.92316	8.92316	8.92316	8.92316	8.92316	chr10	105303593	105348549	-	10_104785605_104740650_-44955|11.78|2|4	PMID:25714049	NM_177368	Tmtc2	exonic	587
chrX:103482600-103482760-	2.01452	9.02928	4.10688	0.111595	0.450865	up	0	0	2	0	0	0	0	0	0	0	8.92316	8.92316	9.89315	8.92316	8.92316	8.92316	8.92316	8.92316	8.92316	8.92316	chrX	103482599	103482760	-		novel	NR_001463	Xist	sense overlapping	161
chr7:29397151-29434825-	2.01451	9.02929	4.10686	0.111595	0.450865	up	0	0	2	0	0	0	0	0	0	0	8.92316	8.92316	9.89315	8.92316	8.92316	8.92316	8.92316	8.92316	8.92316	8.92316	chr7	29397150	29434825	-		novel	NM_001081028	Sipa1l3	exonic	2031
chr1:53865041-53914632-	2.01367	9.03593	4.08074	0.111595	0.450865	up	0	0	0	0	2	0	0	0	0	0	8.92316	8.92316	8.92316	8.92316	9.89321	8.92316	8.92316	8.92316	8.92316	8.92316	chr1	53865040	53914632	-	1_53971476_53921885_-49591|16.84|15|51	PMID:25714049	NM_001001883	Hecw2	exonic	1095
chr16:23110580-23111263+	2.01336	9.03824	4.0654	0.111595	0.450865	up	0	0	0	0	2	0	0	0	0	0	8.92316	8.92316	8.92316	8.92316	9.89321	8.92316	8.92316	8.92316	8.92316	8.92316	chr16	23110579	23111263	+	mmu_circ_0006166	circBase	NM_013506	Eif4a2	exonic	282
chr19:37328981-37330612-	2.01328	9.03829	4.06484	0.111595	0.450865	up	0	0	2	0	0	0	0	0	0	0	8.92316	8.92316	9.89315	8.92316	8.92316	8.92316	8.92316	8.92316	8.92316	8.92316	chr19	37328980	37330612	-	19_37405102_37403471_-1631|18.11|5|6	PMID:25714049	uc008hil.1	Ide	exonic	393
chr1:43980294-44002165+	2.0132	9.03894	4.06004	0.111595	0.450865	up	0	0	2	0	0	0	0	0	0	0	8.92316	8.92316	9.89315	8.92316	8.92316	8.92316	8.92316	8.92316	8.92316	8.92316	chr1	43980293	44002165	+		novel	NM_009418	Tpp2	sense overlapping	21872
chr6:39165097-39181613-	2.01289	9.04187	4.03608	0.111595	0.450865	up	0	0	0	0	2	0	0	0	0	0	8.92316	8.92316	8.92316	8.92316	9.89321	8.92316	8.92316	8.92316	8.92316	8.92316	chr6	39165096	39181613	-	6_39131612_39115096_-16516|17.62|4|6	PMID:25714049	NM_001033430	Kdm7a	exonic	1052
chr16:16230641-16247043+	2.01283	9.4211	2.73556	0.0981375	0.450865	up	6	0	0	1	0	0	0	0	1	0	10.6859	8.92316	8.92316	9.48344	8.92316	8.92316	8.92316	8.92316	9.49515	8.92316	chr16	16230640	16247043	+	16_16247136_16230734_-16402|16.51|3|3	PMID:25714049	NM_026163	Pkp2	exonic	522
chr6:93745434-93747374-	2.01274	9.04249	4.03037	0.111595	0.450865	up	0	0	2	0	0	0	0	0	0	0	8.92316	8.92316	9.89315	8.92316	8.92316	8.92316	8.92316	8.92316	8.92316	8.92316	chr6	93745433	93747374	-	mmu_circ_0013616	circBase	NM_010367	Magi1	exonic	804
chr5:24126822-24141293+	2.01268	9.04294	4.02619	0.111595	0.450865	up	0	0	2	0	0	0	0	0	0	0	8.92316	8.92316	9.89315	8.92316	8.92316	8.92316	8.92316	8.92316	8.92316	8.92316	chr5	24126821	24141293	+	5_23647111_23632640_-14471|17.57|12|25	PMID:25714049	NM_026448	Klhl7	exonic	816
chr15:27897834-27905331-	2.01268	9.04298	4.02579	0.111595	0.450865	up	0	0	2	0	0	0	0	0	0	0	8.92316	8.92316	9.89315	8.92316	8.92316	8.92316	8.92316	8.92316	8.92316	8.92316	chr15	27897833	27905331	-	15_27835086_27827589_-7497|17.63|7|8	PMID:25714049	NM_001081302	Trio	exonic	1021
chr12:110896087-110915478+	2.01265	9.04376	4.01849	0.111595	0.450865	up	0	0	0	0	2	0	0	0	0	0	8.92316	8.92316	8.92316	8.92316	9.89321	8.92316	8.92316	8.92316	8.92316	8.92316	chr12	110896086	110915478	+	12_112153688_112134297_-19391|14.01|2|2	PMID:25714049	NM_175336	Tecpr2	exonic	549
chr5:137150709-137151083-	2.01257	9.04388	4.01725	0.111595	0.450865	up	0	0	2	0	0	0	0	0	0	0	8.92316	8.92316	9.89315	8.92316	8.92316	8.92316	8.92316	8.92316	8.92316	8.92316	chr5	137150708	137151083	-		novel			intergenic	375
chr1:133259009-133294708+	2.01256	9.04393	4.0167	0.111595	0.450865	up	0	0	2	0	0	0	0	0	0	0	8.92316	8.92316	9.89315	8.92316	8.92316	8.92316	8.92316	8.92316	8.92316	8.92316	chr1	133259008	133294708	+		novel	NM_182930	Plekha6	exonic	3500
chr10:45588380-45618629+	2.01245	8.99189	4.50715	0.111595	0.450865	up	0	0	1	1	0	0	0	0	0	0	8.92316	8.92316	9.48818	9.48344	8.92316	8.92316	8.92316	8.92316	8.92316	8.92316	chr10	45588379	45618629	+	10_45338435_45308186_-30249|16.00|13|25	PMID:25714049	NM_172473	Hace1	exonic	458
chr3:104652742-104653587+	2.01245	8.99098	4.52599	0.111595	0.450865	up	0	0	1	1	0	0	0	0	0	0	8.92316	8.92316	9.48818	9.48344	8.92316	8.92316	8.92316	8.92316	8.92316	8.92316	chr3	104652741	104653587	+	3_104457510_104456665_-845|18.19|6|6	PMID:25714049	NM_009196	Slc16a1	exonic	846
chr15:4091168-4101879+	2.01245	8.99477	4.44832	0.111595	0.450865	up	0	0	1	1	0	0	0	0	0	0	8.92316	8.92316	9.48818	9.48344	8.92316	8.92316	8.92316	8.92316	8.92316	8.92316	chr15	4091167	4101879	+	15_4051879_4041168_-10711|19.59|3|3	PMID:25714049	NM_024188	Oxct1	exonic	516
chr4:130668925-130669203+	2.01245	8.99155	4.51418	0.111595	0.450865	up	0	0	1	1	0	0	0	0	0	0	8.92316	8.92316	9.48818	9.48344	8.92316	8.92316	8.92316	8.92316	8.92316	8.92316	chr4	130668924	130669203	+	mmu_circ_0011243	circBase	NM_030722	Pum1	sense overlapping	279
chr8:46068056-46116398-	2.01245	8.99398	4.46442	0.111595	0.450865	up	0	0	1	1	0	0	0	0	0	0	8.92316	8.92316	9.48818	9.48344	8.92316	8.92316	8.92316	8.92316	8.92316	8.92316	chr8	46068055	46116398	-	8_47201752_47153410_-48342|14.39|4|4	PMID:25714049	NM_207213	Snx25	exonic	830
chr17:17529701-17579372-	2.01245	8.99098	4.52599	0.111595	0.450865	up	0	0	1	1	0	0	0	0	0	0	8.92316	8.92316	9.48818	9.48344	8.92316	8.92316	8.92316	8.92316	8.92316	8.92316	chr17	17529700	17579372	-	17_17716336_17666665_-49671|10.79|2|2	PMID:25714049	NM_172827	Lnpep	sense overlapping	49672
chr7:115943894-116024521-	2.01245	8.99443	4.45513	0.111595	0.450865	up	0	0	1	1	0	0	0	0	0	0	8.92316	8.92316	9.48818	9.48344	8.92316	8.92316	8.92316	8.92316	8.92316	8.92316	chr7	115943893	116024521	-	mmu_circ_0013798	circBase	NM_011445	Sox6	sense overlapping	80628
chr18:61146429-61163028-	2.01245	8.99389	4.46613	0.111595	0.450865	up	0	0	1	1	0	0	0	0	0	0	8.92316	8.92316	9.48818	9.48344	8.92316	8.92316	8.92316	8.92316	8.92316	8.92316	chr18	61146428	61163028	-		novel	NM_134134	Hmgxb3	exonic	1405
chr11:86635175-86665878-	2.01244	9.04541	4.00202	0.111595	0.450865	up	0	0	0	0	2	0	0	0	0	0	8.92316	8.92316	8.92316	8.92316	9.89321	8.92316	8.92316	8.92316	8.92316	8.92316	chr11	86635174	86665878	-	mmu_circ_0003506	circBase	NM_029478	Vmp1	exonic	740
chr14:118594762-118604253-	2.01242	9.04502	4.00592	0.111595	0.450865	up	0	0	2	0	0	0	0	0	0	0	8.92316	8.92316	9.89315	8.92316	8.92316	8.92316	8.92316	8.92316	8.92316	8.92316	chr14	118594761	118604253	-	14_119003475_118993984_-9491|20.04|3|3	PMID:25714049	NM_001033336	Abcc4	exonic	728
chr15:101198784-101203094+	2.01238	9.04588	3.99717	0.111595	0.450865	up	0	0	0	0	2	0	0	0	0	0	8.92316	8.92316	8.92316	8.92316	9.89321	8.92316	8.92316	8.92316	8.92316	8.92316	chr15	101198783	101203094	+		novel	NM_007395	Acvr1b	exonic	556
chr1:40742620-40744005+	2.01234	9.0462	3.99375	0.111595	0.450865	up	0	0	0	0	2	0	0	0	0	0	8.92316	8.92316	8.92316	8.92316	9.89321	8.92316	8.92316	8.92316	8.92316	8.92316	chr1	40742619	40744005	+	1_40800850_40799465_-1385|19.42|4|4	PMID:25714049	NM_001033289	Slc9a2	exonic	421
chr2:168661929-168710976-	2.01224	9.0465	3.99046	0.111595	0.450865	up	0	0	2	0	0	0	0	0	0	0	8.92316	8.92316	9.89315	8.92316	8.92316	8.92316	8.92316	8.92316	8.92316	8.92316	chr2	168661928	168710976	-	mmu_circ_0009614	circBase	NM_015731	Atp9a	exonic	1600
chr14:56613654-56622251+	2.01216	9.00861	4.19622	0.111595	0.450865	up	0	0	1	1	0	0	0	0	0	0	8.92316	8.92316	9.48818	9.48344	8.92316	8.92316	8.92316	8.92316	8.92316	8.92316	chr14	56613653	56622251	+		novel	NM_001145978	Parp4	exonic	693
chr13:94493669-94547893+	2.01213	9.011	4.14523	0.111595	0.450865	up	0	0	0	1	1	0	0	0	0	0	8.92316	8.92316	8.92316	9.48344	9.48822	8.92316	8.92316	8.92316	8.92316	8.92316	chr13	94493668	94547893	+		novel	NM_009680	Ap3b1	exonic	734
chr2:59948087-59958492-	2.0121	9.04763	3.97814	0.111595	0.450865	up	0	0	2	0	0	0	0	0	0	0	8.92316	8.92316	9.89315	8.92316	8.92316	8.92316	8.92316	8.92316	8.92316	8.92316	chr2	59948086	59958492	-	2_59796549_59786144_-10405|17.71|8|12	PMID:25714049	NM_001001182	Baz2b	exonic	381
chr17:79875802-79887716-	2.01208	9.0478	3.97631	0.111595	0.450865	up	0	0	2	0	0	0	0	0	0	0	8.92316	8.92316	9.89315	8.92316	8.92316	8.92316	8.92316	8.92316	8.92316	8.92316	chr17	79875801	79887716	-		novel	ENSMUST00000112437	Atl2	intronic	11915
chr9:120129158-120130363+	2.01206	9.01239	4.11565	0.111595	0.450865	up	0	0	1	1	0	0	0	0	0	0	8.92316	8.92316	9.48818	9.48344	8.92316	8.92316	8.92316	8.92316	8.92316	8.92316	chr9	120129157	120130363	+		novel	NM_011029	Rpsa	exonic	365
chr14:13951206-13954656-	2.01167	9.05121	3.94517	0.111595	0.450865	up	0	0	2	0	0	0	0	0	0	0	8.92316	8.92316	9.89315	8.92316	8.92316	8.92316	8.92316	8.92316	8.92316	8.92316	chr14	13951205	13954656	-	14_14787170_14783720_-3450|17.33|14|32	PMID:25714049	NM_025435	Thoc7	exonic	391
chr19:5845163-5845398-	2.0115	9.01955	4.07676	0.111595	0.450865	up	0	0	0	1	1	0	0	0	0	0	8.92316	8.92316	8.92316	9.48344	9.48822	8.92316	8.92316	8.92316	8.92316	8.92316	chr19	5845162	5845398	-		novel	NR_003513	Neat1	sense overlapping	236
chr8:33342977-33353399-	2.01146	9.05302	3.93303	0.111595	0.450865	up	0	0	2	0	0	0	0	0	0	0	8.92316	8.92316	9.89315	8.92316	8.92316	8.92316	8.92316	8.92316	8.92316	8.92316	chr8	33342976	33353399	-		novel	NM_011721	Wrn	exonic	513
chr7:80304361-80307695+	2.01077	9.02481	4.09844	0.111595	0.450865	up	0	0	1	1	0	0	0	0	0	0	8.92316	8.92316	9.48818	9.48344	8.92316	8.92316	8.92316	8.92316	8.92316	8.92316	chr7	80304360	80307695	+		novel	NM_145150	Prc1	exonic	840
chr2:24824945-24863908-	2.01064	9.02611	4.10013	0.111595	0.450865	up	0	0	0	1	1	0	0	0	0	0	8.92316	8.92316	8.92316	9.48344	9.48822	8.92316	8.92316	8.92316	8.92316	8.92316	chr2	24824944	24863908	-	mmu_circ_0009730	circBase	NM_172545	Ehmt1	exonic	1661
chr3:79609799-79615146-	2.01049	9.06036	3.89172	0.111595	0.450865	up	0	0	2	0	0	0	0	0	0	0	8.92316	8.92316	9.89315	8.92316	8.92316	8.92316	8.92316	8.92316	8.92316	8.92316	chr3	79609798	79615146	-	3_79419068_79413721_-5347|16.65|3|7	PMID:25714049	NM_025794	Etfdh	exonic	601
chr9:100880776-100891136+	2.01047	9.02715	4.10036	0.111595	0.450865	up	0	0	1	1	0	0	0	0	0	0	8.92316	8.92316	9.48818	9.48344	8.92316	8.92316	8.92316	8.92316	8.92316	8.92316	chr9	100880775	100891136	+	9_100791555_100781195_-10360|14.64|3|4	PMID:25714049	NM_009282	Stag1	exonic	768
chr2:18293954-18317000-	2.01041	9.06129	3.88535	0.111595	0.450865	up	0	0	1	0	1	0	0	0	0	0	8.92316	8.92316	9.48818	8.92316	9.48822	8.92316	8.92316	8.92316	8.92316	8.92316	chr2	18293953	18317000	-	2_18238627_18215581_-23046|17.17|14|25	PMID:25714049	NM_007869	Dnajc1	exonic	598
chr3:132904658-132917553-	2.0102	9.02933	4.09824	0.111595	0.450865	up	0	0	1	1	0	0	0	0	0	0	8.92316	8.92316	9.48818	9.48344	8.92316	8.92316	8.92316	8.92316	8.92316	8.92316	chr3	132904657	132917553	-	3_132580517_132567622_-12895|20.50|2|3	PMID:25714049	NM_033525	Npnt	exonic	987
chr6:71885309-71889686-	2.01008	9.03029	4.09619	0.111595	0.450865	up	0	0	1	1	0	0	0	0	0	0	8.92316	8.92316	9.48818	9.48344	8.92316	8.92316	8.92316	8.92316	8.92316	8.92316	chr6	71885308	71889686	-	6_71839680_71835303_-4377|18.14|5|8	PMID:25714049	NM_027275	Ptcd3	exonic	399
chr5:5227164-5249228-	2.0092	9.07095	3.8049	0.111595	0.450865	up	0	0	2	0	0	0	0	0	0	0	8.92316	8.92316	9.89315	8.92316	8.92316	8.92316	8.92316	8.92316	8.92316	8.92316	chr5	5227163	5249228	-	5_5249228_5227164_-22064|20.83|14|41	PMID:25714049	NM_011074	Cdk14	exonic	341
chr4:132363731-132371120-	2.00919	9.0377	4.06075	0.111595	0.450865	up	0	0	1	1	0	0	0	0	0	0	8.92316	8.92316	9.48818	9.48344	8.92316	8.92316	8.92316	8.92316	8.92316	8.92316	chr4	132363730	132371120	-		novel	NM_175306	Phactr4	exonic	1049
chr2:49018254-49099809+	2.00916	9.03828	4.05672	0.111595	0.450865	up	0	0	0	1	1	0	0	0	0	0	8.92316	8.92316	8.92316	9.48344	9.48822	8.92316	8.92316	8.92316	8.92316	8.92316	chr2	49018253	49099809	+	2_48955329_48873774_-81555|19.62|11|13	PMID:25714049	NM_029924	Mbd5	exonic	228
chr14:31030844-31052321+	2.00882	9.04093	4.03585	0.111595	0.450865	up	0	0	1	1	0	0	0	0	0	0	8.92316	8.92316	9.48818	9.48344	8.92316	8.92316	8.92316	8.92316	8.92316	8.92316	chr14	31030843	31052321	+		novel	NM_001081251	Pbrm1	exonic	1207
chr19:38503108-38525452+	2.00857	9.04347	4.01315	0.111595	0.450865	up	0	0	0	1	1	0	0	0	0	0	8.92316	8.92316	8.92316	9.48344	9.48822	8.92316	8.92316	8.92316	8.92316	8.92316	chr19	38503107	38525452	+		novel	NM_019588	Plce1	sense overlapping	22345
chr11:32708188-32711997+	2.00853	9.0438	4.00996	0.111595	0.450865	up	0	0	0	1	1	0	0	0	0	0	8.92316	8.92316	8.92316	9.48344	9.48822	8.92316	8.92316	8.92316	8.92316	8.92316	chr11	32708187	32711997	+	11_32611997_32608188_-3809|21.04|13|28	PMID:25714049	NM_134015	Fbxw11	exonic	289
chr2:155292690-155299189-	2.00838	9.07735	3.75469	0.111595	0.450865	up	0	0	0	0	2	0	0	0	0	0	8.92316	8.92316	8.92316	8.92316	9.89321	8.92316	8.92316	8.92316	8.92316	8.92316	chr2	155292689	155299189	-	mmu_circ_0009467	circBase	NM_001004721	Pigu	exonic	412
chr5:104538826-104541262+	2.00829	9.07795	3.74965	0.111595	0.450865	up	0	0	0	0	2	0	0	0	0	0	8.92316	8.92316	8.92316	8.92316	9.89321	8.92316	8.92316	8.92316	8.92316	8.92316	chr5	104538825	104541262	+	mmu_circ_0001374	circBase	NR_030673	D930016D06Rik	exonic	245
chr16:55980595-55982406+	2.00812	9.07922	3.73867	0.111595	0.450865	up	0	0	0	0	2	0	0	0	0	0	8.92316	8.92316	8.92316	8.92316	9.89321	8.92316	8.92316	8.92316	8.92316	8.92316	chr16	55980594	55982406	+	16_55982519_55980708_-1811|15.08|8|13	PMID:25714049	NM_173026	Zbtb11	exonic	468
chr17:64308622-64313118-	2.00796	9.08043	3.7278	0.111595	0.450865	up	0	0	0	0	2	0	0	0	0	0	8.92316	8.92316	8.92316	8.92316	9.89321	8.92316	8.92316	8.92316	8.92316	8.92316	chr17	64308621	64313118	-	17_64662459_64657963_-4496|19.60|12|17	PMID:25714049	NM_144859	Pja2	exonic	1364
chr3:130040674-130041447-	2.00793	9.08064	3.72588	0.111595	0.450865	up	0	0	0	0	2	0	0	0	0	0	8.92316	8.92316	8.92316	8.92316	9.89321	8.92316	8.92316	8.92316	8.92316	8.92316	chr3	130040673	130041447	-	3_129744365_129743592_-773|21.16|3|3	PMID:25714049	NM_207209	Sec24b	exonic	774
chr5:30166665-30169595+	2.00782	9.05007	3.94434	0.111595	0.450865	up	0	0	1	1	0	0	0	0	0	0	8.92316	8.92316	9.48818	9.48344	8.92316	8.92316	8.92316	8.92316	8.92316	8.92316	chr5	30166664	30169595	+		novel	NM_145558	Hadhb	exonic	245
chr1:87915492-87940306+	2.00782	8.95773	5.25708	0.111595	0.450865	up	0	0	0	2	0	0	0	0	0	0	8.92316	8.92316	8.92316	9.88598	8.92316	8.92316	8.92316	8.92316	8.92316	8.92316	chr1	87915491	87940306	+		novel	NM_177646	Dgkd	exonic	2989
chr19:17572424-17595778-	2.00782	8.95773	5.25708	0.111595	0.450865	up	0	0	0	2	0	0	0	0	0	0	8.92316	8.92316	8.92316	9.88598	8.92316	8.92316	8.92316	8.92316	8.92316	8.92316	chr19	17572423	17595778	-	19_17670268_17646914_-23354|17.25|2|2	PMID:25714049	NM_001163144	Pcsk5	exonic	885
chr1:93407869-93408097-	2.00782	8.95773	5.25708	0.111595	0.450865	up	0	0	0	2	0	0	0	0	0	0	8.92316	8.92316	8.92316	9.88598	8.92316	8.92316	8.92316	8.92316	8.92316	8.92316	chr1	93407868	93408097	-		novel	NM_133808	Hdlbp	sense overlapping	229
chr19:3486976-3544255-	2.00782	8.95773	5.25708	0.111595	0.450865	up	0	0	0	2	0	0	0	0	0	0	8.92316	8.92316	8.92316	9.88598	8.92316	8.92316	8.92316	8.92316	8.92316	8.92316	chr19	3486975	3544255	-	19_3544255_3486976_-57279|22.16|2|2	PMID:25714049	NM_028999	Ppp6r3	exonic	1613
chr7:79880092-79882573-	2.00782	8.95773	5.25708	0.111595	0.450865	up	0	0	0	2	0	0	0	0	0	0	8.92316	8.92316	8.92316	9.88598	8.92316	8.92316	8.92316	8.92316	8.92316	8.92316	chr7	79880091	79882573	-		novel	AK139798		intronic	2482
chr1:78466967-78472634-	2.00782	8.99187	4.49794	0.111595	0.450865	up	0	0	0	2	0	0	0	0	0	0	8.92316	8.92316	8.92316	9.88598	8.92316	8.92316	8.92316	8.92316	8.92316	8.92316	chr1	78466966	78472634	-		novel	NM_011811	Farsb	exonic	445
chr7:110072122-110086340+	2.00782	8.95773	5.25708	0.111595	0.450865	up	0	0	0	2	0	0	0	0	0	0	8.92316	8.92316	8.92316	9.88598	8.92316	8.92316	8.92316	8.92316	8.92316	8.92316	chr7	110072121	110086340	+		novel	NM_009281	Zfp143	exonic	1083
chr5:90946790-90948945+	2.00782	8.95773	5.25708	0.111595	0.450865	up	0	0	0	2	0	0	0	0	0	0	8.92316	8.92316	8.92316	9.88598	8.92316	8.92316	8.92316	8.92316	8.92316	8.92316	chr5	90946789	90948945	+	5_91377971_91375816_-2155|16.43|5|8	PMID:25714049	NM_026788	Mthfd2l	exonic	308
chr17:74638421-74640188+	2.00782	8.95773	5.25708	0.111595	0.450865	up	0	0	0	2	0	0	0	0	0	0	8.92316	8.92316	8.92316	9.88598	8.92316	8.92316	8.92316	8.92316	8.92316	8.92316	chr17	74638420	74640188	+		novel	NM_007566	Birc6	sense overlapping	1768
chr5:58130043-58130354+	2.00782	8.95773	5.25708	0.111595	0.450865	up	0	0	0	2	0	0	0	0	0	0	8.92316	8.92316	8.92316	9.88598	8.92316	8.92316	8.92316	8.92316	8.92316	8.92316	chr5	58130042	58130354	+		novel	NM_001122758	Pcdh7	sense overlapping	312
chrX:108771521-108785781-	2.00782	8.97605	4.83503	0.111595	0.450865	up	0	0	0	2	0	0	0	0	0	0	8.92316	8.92316	8.92316	9.88598	8.92316	8.92316	8.92316	8.92316	8.92316	8.92316	chrX	108771520	108785781	-		novel	NM_001081477	Brwd3	exonic	1086
chr15:35471883-35472064+	2.00782	8.95773	5.25708	0.111595	0.450865	up	0	0	0	2	0	0	0	0	0	0	8.92316	8.92316	8.92316	9.88598	8.92316	8.92316	8.92316	8.92316	8.92316	8.92316	chr15	35471882	35472064	+		novel	NM_177151	Vps13b	exonic	182
chr5:74606037-74610811-	2.00782	8.95773	5.25708	0.111595	0.450865	up	0	0	0	2	0	0	0	0	0	0	8.92316	8.92316	8.92316	9.88598	8.92316	8.92316	8.92316	8.92316	8.92316	8.92316	chr5	74606036	74610811	-		novel	NM_010727	Lnx1	exonic	530
chr15:33212816-33213263+	2.00782	8.97614	4.83315	0.111595	0.450865	up	0	0	0	2	0	0	0	0	0	0	8.92316	8.92316	8.92316	9.88598	8.92316	8.92316	8.92316	8.92316	8.92316	8.92316	chr15	33212815	33213263	+		novel	NM_018755	Cpq	exonic	448
chr5:44532661-44541859-	2.00782	8.99269	4.4813	0.111595	0.450865	up	0	0	0	2	0	0	0	0	0	0	8.92316	8.92316	8.92316	9.88598	8.92316	8.92316	8.92316	8.92316	8.92316	8.92316	chr5	44532660	44541859	-	5_44933098_44923900_-9198|20.63|17|43	PMID:25714049	NM_010698	Ldb2	exonic	380
chr2:85155570-85160863+	2.00782	8.95773	5.25708	0.111595	0.450865	up	0	0	0	2	0	0	0	0	0	0	8.92316	8.92316	8.92316	9.88598	8.92316	8.92316	8.92316	8.92316	8.92316	8.92316	chr2	85155569	85160863	+		novel	uc008kka.1	BC027685	sense overlapping	5294
chr19:56790919-56792160-	2.00782	8.95773	5.25708	0.111595	0.450865	up	0	0	0	2	0	0	0	0	0	0	8.92316	8.92316	8.92316	9.88598	8.92316	8.92316	8.92316	8.92316	8.92316	8.92316	chr19	56790918	56792160	-	19_56866650_56865409_-1241|12.23|3|3	PMID:25714049	ENSMUST00000135666	A630007B06Rik	exonic	348
chr4:130166020-130166333-	2.00782	8.95773	5.25708	0.111595	0.450865	up	0	0	0	2	0	0	0	0	0	0	8.92316	8.92316	8.92316	9.88598	8.92316	8.92316	8.92316	8.92316	8.92316	8.92316	chr4	130166019	130166333	-		novel	NM_023476	Tinagl1	sense overlapping	314
chr7:123400438-123404497+	2.00782	8.95773	5.25708	0.111595	0.450865	up	0	0	0	2	0	0	0	0	0	0	8.92316	8.92316	8.92316	9.88598	8.92316	8.92316	8.92316	8.92316	8.92316	8.92316	chr7	123400437	123404497	+		novel	NM_025304	Lcmt1	sense overlapping	4060
chr12:71989946-71990130+	2.00782	8.95773	5.25708	0.111595	0.450865	up	0	0	0	2	0	0	0	0	0	0	8.92316	8.92316	8.92316	9.88598	8.92316	8.92316	8.92316	8.92316	8.92316	8.92316	chr12	71989945	71990130	+		novel	NM_026102	Daam1	sense overlapping	185
chr4:126863425-126904505-	2.00782	8.95773	5.25708	0.111595	0.450865	up	0	0	0	2	0	0	0	0	0	0	8.92316	8.92316	8.92316	9.88598	8.92316	8.92316	8.92316	8.92316	8.92316	8.92316	chr4	126863424	126904505	-		novel	NM_001114399	Zmym4	sense overlapping	41081
chrX:140736435-140738468+	2.00782	8.95773	5.25708	0.111595	0.450865	up	0	0	0	2	0	0	0	0	0	0	8.92316	8.92316	8.92316	9.88598	8.92316	8.92316	8.92316	8.92316	8.92316	8.92316	chrX	140736434	140738468	+		novel	NM_011845	Mid2	exonic	257
chr9:77487264-77489140-	2.00782	8.95773	5.25708	0.111595	0.450865	up	0	0	0	2	0	0	0	0	0	0	8.92316	8.92316	8.92316	9.88598	8.92316	8.92316	8.92316	8.92316	8.92316	8.92316	chr9	77487263	77489140	-		novel	ENSMUST00000113421	Lrrc1	intronic	1877
chr18:77097249-77135951+	2.00782	8.97612	4.83354	0.111595	0.450865	up	0	0	0	2	0	0	0	0	0	0	8.92316	8.92316	8.92316	9.88598	8.92316	8.92316	8.92316	8.92316	8.92316	8.92316	chr18	77097248	77135951	+	18_77374690_77335988_-38702|17.29|7|8	PMID:25714049	NM_008602	Pias2	exonic	1484
chr9:96580487-96611499-	2.00782	8.95773	5.25708	0.111595	0.450865	up	0	0	0	2	0	0	0	0	0	0	8.92316	8.92316	8.92316	9.88598	8.92316	8.92316	8.92316	8.92316	8.92316	8.92316	chr9	96580486	96611499	-	9_96511918_96480906_-31012|18.26|2|2	PMID:25714049	NM_053268	Rasa2	exonic	551
chr5:137149351-137149707-	2.00782	8.95773	5.25708	0.111595	0.450865	up	0	0	0	2	0	0	0	0	0	0	8.92316	8.92316	8.92316	9.88598	8.92316	8.92316	8.92316	8.92316	8.92316	8.92316	chr5	137149350	137149707	-		novel			intergenic	357
chr10:89480491-89483524-	2.00782	8.95773	5.25708	0.111595	0.450865	up	0	0	0	2	0	0	0	0	0	0	8.92316	8.92316	8.92316	9.88598	8.92316	8.92316	8.92316	8.92316	8.92316	8.92316	chr10	89480490	89483524	-		novel	NM_009108	Nr1h4	exonic	278
chr2:24824945-24887066-	2.00782	8.95773	5.25708	0.111595	0.450865	up	0	0	0	2	0	0	0	0	0	0	8.92316	8.92316	8.92316	9.88598	8.92316	8.92316	8.92316	8.92316	8.92316	8.92316	chr2	24824944	24887066	-		novel	AK087831		intronic	62122
chrX:93488095-93493581-	2.00782	8.95773	5.25708	0.111595	0.450865	up	0	0	0	2	0	0	0	0	0	0	8.92316	8.92316	8.92316	9.88598	8.92316	8.92316	8.92316	8.92316	8.92316	8.92316	chrX	93488094	93493581	-		novel	NM_008892	Pola1	exonic	465
chr14:20693730-20694060+	2.00782	8.95773	5.25708	0.111595	0.450865	up	0	0	0	2	0	0	0	0	0	0	8.92316	8.92316	8.92316	9.88598	8.92316	8.92316	8.92316	8.92316	8.92316	8.92316	chr14	20693729	20694060	+		novel	NM_172596	Sec24c	sense overlapping	331
chr13:14181220-14184505+	2.00782	8.95773	5.25708	0.111595	0.450865	up	0	0	0	2	0	0	0	0	0	0	8.92316	8.92316	8.92316	9.88598	8.92316	8.92316	8.92316	8.92316	8.92316	8.92316	chr13	14181219	14184505	+	13_14276772_14273487_-3285|17.80|3|3	PMID:25714049	NM_194262	Arid4b	exonic	284
chr7:141691163-141700496+	2.00782	8.98939	4.54921	0.111595	0.450865	up	0	0	0	2	0	0	0	0	0	0	8.92316	8.92316	8.92316	9.88598	8.92316	8.92316	8.92316	8.92316	8.92316	8.92316	chr7	141691162	141700496	+		novel	NM_023566	Muc2	sense overlapping	9334
chr13:49430869-49450083+	2.00782	8.95773	5.25708	0.111595	0.450865	up	0	0	0	2	0	0	0	0	0	0	8.92316	8.92316	8.92316	9.88598	8.92316	8.92316	8.92316	8.92316	8.92316	8.92316	chr13	49430868	49450083	+		novel	NM_199056	Ippk	exonic	1083
chr19:36867640-36884163+	2.00782	8.95773	5.25708	0.111595	0.450865	up	0	0	0	2	0	0	0	0	0	0	8.92316	8.92316	8.92316	9.88598	8.92316	8.92316	8.92316	8.92316	8.92316	8.92316	chr19	36867639	36884163	+		novel	NM_001163635	Tnks2	exonic	1466
chr13:45678906-45679195-	2.00782	8.95773	5.25708	0.111595	0.450865	up	0	0	0	2	0	0	0	0	0	0	8.92316	8.92316	8.92316	9.88598	8.92316	8.92316	8.92316	8.92316	8.92316	8.92316	chr13	45678905	45679195	-		novel	ENSMUST00000091628	Atxn1	intronic	290
chr14:21025826-21026013+	2.00782	8.97586	4.83915	0.111595	0.450865	up	0	0	0	2	0	0	0	0	0	0	8.92316	8.92316	8.92316	9.88598	8.92316	8.92316	8.92316	8.92316	8.92316	8.92316	chr14	21025825	21026013	+		novel	ENSMUST00000022369	Vcl	intronic	188
chr3:116608384-116614097+	2.00782	8.95773	5.25708	0.111595	0.450865	up	0	0	0	2	0	0	0	0	0	0	8.92316	8.92316	8.92316	9.88598	8.92316	8.92316	8.92316	8.92316	8.92316	8.92316	chr3	116608383	116614097	+		novel	NM_028349	Sass6	exonic	378
chr6:65058066-65098913+	2.00782	8.95773	5.25708	0.111595	0.450865	up	0	0	0	2	0	0	0	0	0	0	8.92316	8.92316	8.92316	9.88598	8.92316	8.92316	8.92316	8.92316	8.92316	8.92316	chr6	65058065	65098913	+		novel	NM_007958	Smarcad1	exonic	1747
chr2:15696684-15716167+	2.00782	8.95773	5.25708	0.111595	0.450865	up	0	0	0	2	0	0	0	0	0	0	8.92316	8.92316	8.92316	9.88598	8.92316	8.92316	8.92316	8.92316	8.92316	8.92316	chr2	15696683	15716167	+		novel	uc033hll.1	Malrd1	sense overlapping	19484
chr15:102123450-102124788-	2.00782	8.99432	4.44795	0.111595	0.450865	up	0	0	0	2	0	0	0	0	0	0	8.92316	8.92316	8.92316	9.88598	8.92316	8.92316	8.92316	8.92316	8.92316	8.92316	chr15	102123449	102124788	-		novel	ENSMUST00000128884	Spryd3	intronic	1339
chr19:57673119-57755618+	2.00782	8.99159	4.50382	0.111595	0.450865	up	0	0	0	2	0	0	0	0	0	0	8.92316	8.92316	8.92316	9.88598	8.92316	8.92316	8.92316	8.92316	8.92316	8.92316	chr19	57673118	57755618	+		novel	NM_181415	Atrnl1	exonic	2122
chr2:167484149-167484495-	2.00782	8.95773	5.25708	0.111595	0.450865	up	0	0	0	2	0	0	0	0	0	0	8.92316	8.92316	8.92316	9.88598	8.92316	8.92316	8.92316	8.92316	8.92316	8.92316	chr2	167484148	167484495	-		novel	NM_170756	Spata2	sense overlapping	347
chr10:117098318-117112098-	2.00782	8.95773	5.25708	0.111595	0.450865	up	0	0	0	2	0	0	0	0	0	0	8.92316	8.92316	8.92316	9.88598	8.92316	8.92316	8.92316	8.92316	8.92316	8.92316	chr10	117098317	117112098	-		novel	NM_177798	Frs2	sense overlapping	13781
chr3:79172908-79215027-	2.00782	8.97622	4.83129	0.111595	0.450865	up	0	0	0	2	0	0	0	0	0	0	8.92316	8.92316	8.92316	9.88598	8.92316	8.92316	8.92316	8.92316	8.92316	8.92316	chr3	79172907	79215027	-		novel	uc008pnn.1	Rapgef2	sense overlapping	42120
chr9:107857868-107858838-	2.00782	8.95773	5.25708	0.111595	0.450865	up	0	0	0	2	0	0	0	0	0	0	8.92316	8.92316	8.92316	9.88598	8.92316	8.92316	8.92316	8.92316	8.92316	8.92316	chr9	107857867	107858838	-		novel	ENSMUST00000181986	Rbm6	intronic	971
chr16:28911187-28911463-	2.00782	8.95773	5.25708	0.111595	0.450865	up	0	0	0	2	0	0	0	0	0	0	8.92316	8.92316	8.92316	9.88598	8.92316	8.92316	8.92316	8.92316	8.92316	8.92316	chr16	28911186	28911463	-		novel	ENSMUST00000100023	Mb21d2	intronic	277
chr6:92588483-92619618-	2.00782	8.95773	5.25708	0.111595	0.450865	up	0	0	0	2	0	0	0	0	0	0	8.92316	8.92316	8.92316	9.88598	8.92316	8.92316	8.92316	8.92316	8.92316	8.92316	chr6	92588482	92619618	-		novel	ENSMUST00000032093	Prickle2	intronic	31136
chr18:5063194-5088814+	2.00782	8.99265	4.48211	0.111595	0.450865	up	0	0	0	2	0	0	0	0	0	0	8.92316	8.92316	8.92316	9.88598	8.92316	8.92316	8.92316	8.92316	8.92316	8.92316	chr18	5063193	5088814	+	18_5088812_5063192_-25620|20.75|5|5	PMID:25714049	NM_153153	Svil	exonic	1424
chr19:3464545-3478364-	2.00782	8.95773	5.25708	0.111595	0.450865	up	0	0	0	2	0	0	0	0	0	0	8.92316	8.92316	8.92316	9.88598	8.92316	8.92316	8.92316	8.92316	8.92316	8.92316	chr19	3464544	3478364	-		novel	NM_028999	Ppp6r3	exonic	905
chr1:151695690-151709204+	2.00782	8.97616	4.83258	0.111595	0.450865	up	0	0	0	2	0	0	0	0	0	0	8.92316	8.92316	8.92316	9.88598	8.92316	8.92316	8.92316	8.92316	8.92316	8.92316	chr1	151695689	151709204	+		novel	NM_022018	Fam129a	exonic	837
chr10:121395826-121396986+	2.00782	8.95773	5.25708	0.111595	0.450865	up	0	0	0	2	0	0	0	0	0	0	8.92316	8.92316	8.92316	9.88598	8.92316	8.92316	8.92316	8.92316	8.92316	8.92316	chr10	121395825	121396986	+		novel	NM_029364	Gns	sense overlapping	1161
chr12:31278462-31289421+	2.00782	8.95773	5.25708	0.111595	0.450865	up	0	0	0	2	0	0	0	0	0	0	8.92316	8.92316	8.92316	9.88598	8.92316	8.92316	8.92316	8.92316	8.92316	8.92316	chr12	31278461	31289421	+		novel	NM_008482	Lamb1	exonic	1139
chr18:69642883-69657950+	2.00782	8.95773	5.25708	0.111595	0.450865	up	0	0	0	2	0	0	0	0	0	0	8.92316	8.92316	8.92316	9.88598	8.92316	8.92316	8.92316	8.92316	8.92316	8.92316	chr18	69642882	69657950	+	18_69817604_69802537_-15067|20.86|3|4	PMID:25714049	NM_013685	Tcf4	exonic	561
chr11:32662146-32662528+	2.00782	8.95773	5.25708	0.111595	0.450865	up	0	0	0	2	0	0	0	0	0	0	8.92316	8.92316	8.92316	9.88598	8.92316	8.92316	8.92316	8.92316	8.92316	8.92316	chr11	32662145	32662528	+		novel	NM_001271349	Fbxw11	intronic	383
chr5:98880209-98883654+	2.00782	8.95773	5.25708	0.111595	0.450865	up	0	0	0	2	0	0	0	0	0	0	8.92316	8.92316	8.92316	9.88598	8.92316	8.92316	8.92316	8.92316	8.92316	8.92316	chr5	98880208	98883654	+		novel	NM_173404	Bmp3	sense overlapping	3446
chr1:60477012-60477397+	2.00782	8.95773	5.25708	0.111595	0.450865	up	0	0	0	2	0	0	0	0	0	0	8.92316	8.92316	8.92316	9.88598	8.92316	8.92316	8.92316	8.92316	8.92316	8.92316	chr1	60477011	60477397	+		novel	NM_001198570	Abi2	intronic	386
chr3:144690302-144690612-	2.00782	8.95773	5.25708	0.111595	0.450865	up	0	0	0	2	0	0	0	0	0	0	8.92316	8.92316	8.92316	9.88598	8.92316	8.92316	8.92316	8.92316	8.92316	8.92316	chr3	144690301	144690612	-		novel	NM_001282042	Sh3glb1	intronic	311
chr4:84971209-84996580+	2.00782	8.95773	5.25708	0.111595	0.450865	up	0	0	0	2	0	0	0	0	0	0	8.92316	8.92316	8.92316	9.88598	8.92316	8.92316	8.92316	8.92316	8.92316	8.92316	chr4	84971208	84996580	+		novel	NM_175275	Cntln	sense overlapping	25372
chr6:52721298-52746770+	2.00782	8.95773	5.25708	0.111595	0.450865	up	0	0	0	2	0	0	0	0	0	0	8.92316	8.92316	8.92316	9.88598	8.92316	8.92316	8.92316	8.92316	8.92316	8.92316	chr6	52721297	52746770	+	6_52696764_52671292_-25472|17.75|3|3	PMID:25714049	NM_025816	Tax1bp1	exonic	1651
chr2:164428893-164431313-	2.00782	8.95773	5.25708	0.111595	0.450865	up	0	0	0	2	0	0	0	0	0	0	8.92316	8.92316	8.92316	9.88598	8.92316	8.92316	8.92316	8.92316	8.92316	8.92316	chr2	164428892	164431313	-		novel	NM_011521	Sdc4	exonic	370
chr18:39421407-39428780-	2.00782	8.95773	5.25708	0.111595	0.450865	up	0	0	0	2	0	0	0	0	0	0	8.92316	8.92316	8.92316	9.88598	8.92316	8.92316	8.92316	8.92316	8.92316	8.92316	chr18	39421406	39428780	-		novel	NM_008173	Nr3c1	exonic	702
chr14:16383062-16400127+	2.00782	8.95773	5.25708	0.111595	0.450865	up	0	0	0	2	0	0	0	0	0	0	8.92316	8.92316	8.92316	9.88598	8.92316	8.92316	8.92316	8.92316	8.92316	8.92316	chr14	16383061	16400127	+	mmu_circ_0005076	circBase	NM_009409	Top2b	exonic	1716
chr18:65074724-65089849+	2.00782	8.95773	5.25708	0.111595	0.450865	up	0	0	0	2	0	0	0	0	0	0	8.92316	8.92316	8.92316	9.88598	8.92316	8.92316	8.92316	8.92316	8.92316	8.92316	chr18	65074723	65089849	+	18_65249503_65234378_-15125|18.74|3|3	PMID:25714049	NM_031881	Nedd4l	sense overlapping	15126
chr11:77577323-77578827-	2.00782	8.95773	5.25708	0.111595	0.450865	up	0	0	0	2	0	0	0	0	0	0	8.92316	8.92316	8.92316	9.88598	8.92316	8.92316	8.92316	8.92316	8.92316	8.92316	chr11	77577322	77578827	-		novel	NM_144825	Taok1	exonic	148
chr5:92170673-92180630+	2.00782	8.95773	5.25708	0.111595	0.450865	up	0	0	0	2	0	0	0	0	0	0	8.92316	8.92316	8.92316	9.88598	8.92316	8.92316	8.92316	8.92316	8.92316	8.92316	chr5	92170672	92180630	+	5_92609656_92599699_-9957|16.49|3|3	PMID:25714049	NM_019490	Uso1	exonic	530
chr11:67721957-67742327-	2.00782	8.95773	5.25708	0.111595	0.450865	up	0	0	0	2	0	0	0	0	0	0	8.92316	8.92316	8.92316	9.88598	8.92316	8.92316	8.92316	8.92316	8.92316	8.92316	chr11	67721956	67742327	-		novel	NM_175681	Glp2r	sense overlapping	20371
chr19:44934112-44938419+	2.00782	8.95773	5.25708	0.111595	0.450865	up	0	0	0	2	0	0	0	0	0	0	8.92316	8.92316	8.92316	9.88598	8.92316	8.92316	8.92316	8.92316	8.92316	8.92316	chr19	44934111	44938419	+		novel	NM_001081225	Fam178a	exonic	833
chr3:31097270-31113640+	2.00782	8.95773	5.25708	0.111595	0.450865	up	0	0	0	2	0	0	0	0	0	0	8.92316	8.92316	8.92316	9.88598	8.92316	8.92316	8.92316	8.92316	8.92316	8.92316	chr3	31097269	31113640	+		novel	NM_011386	Skil	sense overlapping	16371
chr2:26005326-26016416-	2.00782	8.95773	5.25708	0.111595	0.450865	up	0	0	0	2	0	0	0	0	0	0	8.92316	8.92316	8.92316	9.88598	8.92316	8.92316	8.92316	8.92316	8.92316	8.92316	chr2	26005325	26016416	-		novel	NM_133835	Ubac1	exonic	976
chr11:20703711-20727639-	2.00782	8.99422	4.45002	0.111595	0.450865	up	0	0	0	2	0	0	0	0	0	0	8.92316	8.92316	8.92316	9.88598	8.92316	8.92316	8.92316	8.92316	8.92316	8.92316	chr11	20703710	20727639	-	mmu_circ_0000241	circBase	NM_181411	Aftph	exonic	2414
chr16:94466927-94468389+	2.00782	8.95773	5.25708	0.111595	0.450865	up	0	0	0	2	0	0	0	0	0	0	8.92316	8.92316	8.92316	9.88598	8.92316	8.92316	8.92316	8.92316	8.92316	8.92316	chr16	94466926	94468389	+		novel	NM_009441	Ttc3	sense overlapping	1463
chrX:103475112-103478388-	2.00782	8.95773	5.25708	0.111595	0.450865	up	0	0	0	2	0	0	0	0	0	0	8.92316	8.92316	8.92316	9.88598	8.92316	8.92316	8.92316	8.92316	8.92316	8.92316	chrX	103475111	103478388	-		novel	NR_001463	Xist	sense overlapping	3277
chr1:139081173-139133761+	2.00782	8.9925	4.48502	0.111595	0.450865	up	0	0	0	2	0	0	0	0	0	0	8.92316	8.92316	8.92316	9.88598	8.92316	8.92316	8.92316	8.92316	8.92316	8.92316	chr1	139081172	139133761	+	1_141030338_140977750_-52588|16.67|5|5	PMID:25714049	NM_181347	Dennd1b	exonic	568
chr4:11193926-11198824+	2.00782	8.95773	5.25708	0.111595	0.450865	up	0	0	0	2	0	0	0	0	0	0	8.92316	8.92316	8.92316	9.88598	8.92316	8.92316	8.92316	8.92316	8.92316	8.92316	chr4	11193925	11198824	+		novel	NM_009830	Ccne2	exonic	531
chr1:138966166-139062971+	2.00782	8.95773	5.25708	0.111595	0.450865	up	0	0	0	2	0	0	0	0	0	0	8.92316	8.92316	8.92316	9.88598	8.92316	8.92316	8.92316	8.92316	8.92316	8.92316	chr1	138966165	139062971	+		novel	NM_001166501	Dennd1b	exonic	595
chr6:148325117-148336332-	2.00782	8.95773	5.25708	0.111595	0.450865	up	0	0	0	2	0	0	0	0	0	0	8.92316	8.92316	8.92316	9.88598	8.92316	8.92316	8.92316	8.92316	8.92316	8.92316	chr6	148325116	148336332	-	6_148284854_148273639_-11215|23.06|3|4	PMID:25714049	NM_198967	Tmtc1	exonic	376
chr4:55060014-55060237+	2.00782	8.95773	5.25708	0.111595	0.450865	up	0	0	0	2	0	0	0	0	0	0	8.92316	8.92316	8.92316	9.88598	8.92316	8.92316	8.92316	8.92316	8.92316	8.92316	chr4	55060013	55060237	+		novel	NM_172867	Zfp462	exonic	224
chr1:13256883-13286025-	2.00782	8.95773	5.25708	0.111595	0.450865	up	0	0	0	2	0	0	0	0	0	0	8.92316	8.92316	8.92316	9.88598	8.92316	8.92316	8.92316	8.92316	8.92316	8.92316	chr1	13256882	13286025	-		novel	ENSMUST00000145280	Ncoa2	intronic	29143
chr18:75069012-75126919+	2.00782	8.95773	5.25708	0.111595	0.450865	up	0	0	0	2	0	0	0	0	0	0	8.92316	8.92316	8.92316	9.88598	8.92316	8.92316	8.92316	8.92316	8.92316	8.92316	chr18	75069011	75126919	+		novel	NM_027727	Dym	sense overlapping	57908
chr7:81281178-81293186+	2.00782	8.99174	4.50069	0.111595	0.450865	up	0	0	0	2	0	0	0	0	0	0	8.92316	8.92316	8.92316	9.88598	8.92316	8.92316	8.92316	8.92316	8.92316	8.92316	chr7	81281177	81293186	+		novel	NM_008803	Pde8a	exonic	360
chr7:125772692-125773205+	2.00782	8.95773	5.25708	0.111595	0.450865	up	0	0	0	2	0	0	0	0	0	0	8.92316	8.92316	8.92316	9.88598	8.92316	8.92316	8.92316	8.92316	8.92316	8.92316	chr7	125772691	125773205	+		novel	ENSMUST00000069660	D430042O09Rik	intronic	514
chr10:5240168-5246486-	2.00782	8.99178	4.49989	0.111595	0.450865	up	0	0	0	2	0	0	0	0	0	0	8.92316	8.92316	8.92316	9.88598	8.92316	8.92316	8.92316	8.92316	8.92316	8.92316	chr10	5240167	5246486	-		novel			intergenic	6319
chr9:50504416-50504652+	2.00782	8.95773	5.25708	0.111595	0.450865	up	0	0	0	2	0	0	0	0	0	0	8.92316	8.92316	8.92316	9.88598	8.92316	8.92316	8.92316	8.92316	8.92316	8.92316	chr9	50504415	50504652	+		novel	NM_029639	Plet1	sense overlapping	237
chr1:37485839-37488741-	2.00782	8.95773	5.25708	0.111595	0.450865	up	0	0	0	2	0	0	0	0	0	0	8.92316	8.92316	8.92316	9.88598	8.92316	8.92316	8.92316	8.92316	8.92316	8.92316	chr1	37485838	37488741	-		novel	ENSMUST00000042161	Mgat4a	intronic	2903
chr6:118392818-118404596-	2.00782	8.95773	5.25708	0.111595	0.450865	up	0	0	0	2	0	0	0	0	0	0	8.92316	8.92316	8.92316	9.88598	8.92316	8.92316	8.92316	8.92316	8.92316	8.92316	chr6	118392817	118404596	-		novel	NM_194339	Bms1	sense overlapping	11779
chr4:94952174-94958990-	2.00782	8.95773	5.25708	0.111595	0.450865	up	0	0	0	2	0	0	0	0	0	0	8.92316	8.92316	8.92316	9.88598	8.92316	8.92316	8.92316	8.92316	8.92316	8.92316	chr4	94952173	94958990	-		novel	NM_177239	Mysm1	exonic	537
chr13:59531057-59544451-	2.00782	8.95773	5.25708	0.111595	0.450865	up	0	0	0	2	0	0	0	0	0	0	8.92316	8.92316	8.92316	9.88598	8.92316	8.92316	8.92316	8.92316	8.92316	8.92316	chr13	59531056	59544451	-		novel	NM_023328	Agtpbp1	exonic	469
chr11:72991782-72992360+	2.00782	8.95773	5.25708	0.111595	0.450865	up	0	0	0	2	0	0	0	0	0	0	8.92316	8.92316	8.92316	9.88598	8.92316	8.92316	8.92316	8.92316	8.92316	8.92316	chr11	72991781	72992360	+		novel	NM_016745	Atp2a3	sense overlapping	579
chr11:99009590-99011063-	2.00782	8.95773	5.25708	0.111595	0.450865	up	0	0	0	2	0	0	0	0	0	0	8.92316	8.92316	8.92316	9.88598	8.92316	8.92316	8.92316	8.92316	8.92316	8.92316	chr11	99009589	99011063	-		novel	NM_011623	Top2a	exonic	611
chr1:10061867-10062103+	2.00782	8.95773	5.25708	0.111595	0.450865	up	0	0	0	2	0	0	0	0	0	0	8.92316	8.92316	8.92316	9.88598	8.92316	8.92316	8.92316	8.92316	8.92316	8.92316	chr1	10061866	10062103	+		novel	ENSMUST00000071087	Cspp1	intronic	237
chr9:7864478-7864998-	2.00782	8.98894	4.55862	0.111595	0.450865	up	0	0	0	2	0	0	0	0	0	0	8.92316	8.92316	8.92316	9.88598	8.92316	8.92316	8.92316	8.92316	8.92316	8.92316	chr9	7864477	7864998	-		novel	ENSMUST00000013949	Birc3	intronic	521
chr5:50006749-50025778-	2.00782	8.97637	4.82809	0.111595	0.450865	up	0	0	0	2	0	0	0	0	0	0	8.92316	8.92316	8.92316	9.88598	8.92316	8.92316	8.92316	8.92316	8.92316	8.92316	chr5	50006748	50025778	-		novel	NM_133911	Adgra2	exonic	663
chr11:72981728-72988580+	2.00782	8.95773	5.25708	0.111595	0.450865	up	0	0	0	2	0	0	0	0	0	0	8.92316	8.92316	8.92316	9.88598	8.92316	8.92316	8.92316	8.92316	8.92316	8.92316	chr11	72981727	72988580	+		novel	NM_016745	Atp2a3	exonic	762
chr10:6828885-6830497+	2.00782	8.95773	5.25708	0.111595	0.450865	up	0	0	0	2	0	0	0	0	0	0	8.92316	8.92316	8.92316	9.88598	8.92316	8.92316	8.92316	8.92316	8.92316	8.92316	chr10	6828884	6830497	+	mmu_circ_0002177	circBase	NM_001039652	Oprm1	exonic	874
chr1:173436658-173436953+	2.00782	8.95773	5.25708	0.111595	0.450865	up	0	0	0	2	0	0	0	0	0	0	8.92316	8.92316	8.92316	9.88598	8.92316	8.92316	8.92316	8.92316	8.92316	8.92316	chr1	173436657	173436953	+		novel	AK050724		intronic	296
chr6:108804689-108818613+	2.00782	8.95773	5.25708	0.111595	0.450865	up	0	0	0	2	0	0	0	0	0	0	8.92316	8.92316	8.92316	9.88598	8.92316	8.92316	8.92316	8.92316	8.92316	8.92316	chr6	108804688	108818613	+		novel	NM_026011	Arl8b	sense overlapping	13925
chr6:113312566-113312917+	2.00782	8.95773	5.25708	0.111595	0.450865	up	0	0	0	2	0	0	0	0	0	0	8.92316	8.92316	8.92316	9.88598	8.92316	8.92316	8.92316	8.92316	8.92316	8.92316	chr6	113312565	113312917	+		novel	ENSMUST00000113117	Brpf1	intronic	352
chr15:99990293-99996676+	2.00782	8.95773	5.25708	0.111595	0.450865	up	0	0	0	2	0	0	0	0	0	0	8.92316	8.92316	8.92316	9.88598	8.92316	8.92316	8.92316	8.92316	8.92316	8.92316	chr15	99990292	99996676	+		novel	NM_001024526	Larp4	exonic	616
chr9:60375953-60433004-	2.00782	8.97428	4.87432	0.111595	0.450865	up	0	0	0	2	0	0	0	0	0	0	8.92316	8.92316	8.92316	9.88598	8.92316	8.92316	8.92316	8.92316	8.92316	8.92316	chr9	60375952	60433004	-		novel	NM_001040426	Thsd4	sense overlapping	57052
chr8:25678716-25716683+	2.00782	8.95773	5.25708	0.111595	0.450865	up	0	0	0	2	0	0	0	0	0	0	8.92316	8.92316	8.92316	9.88598	8.92316	8.92316	8.92316	8.92316	8.92316	8.92316	chr8	25678715	25716683	+		novel	NM_001081269	Whsc1l1	sense overlapping	37968
chr1:58417013-58417179-	2.00782	8.95773	5.25708	0.111595	0.450865	up	0	0	0	2	0	0	0	0	0	0	8.92316	8.92316	8.92316	9.88598	8.92316	8.92316	8.92316	8.92316	8.92316	8.92316	chr1	58417012	58417179	-	1_58474023_58473857_-166|15.00|3|3	PMID:25714049	NR_027853	Clk1	exonic	167
chr2:18146777-18171075+	2.00782	8.97484	4.86194	0.111595	0.450865	up	0	0	0	2	0	0	0	0	0	0	8.92316	8.92316	8.92316	9.88598	8.92316	8.92316	8.92316	8.92316	8.92316	8.92316	chr2	18146776	18171075	+	2_18092702_18068404_-24298|20.93|20|44	PMID:25714049	NM_010804	Mllt10	exonic	1000
chr18:24506834-24509922-	2.00782	8.97614	4.83314	0.111595	0.450865	up	0	0	0	2	0	0	0	0	0	0	8.92316	8.92316	8.92316	9.88598	8.92316	8.92316	8.92316	8.92316	8.92316	8.92316	chr18	24506833	24509922	-	18_24668423_24665335_-3088|12.40|8|8	PMID:25714049	NM_144861	Rprd1a	exonic	638
chr7:116359996-116363442-	2.00782	8.98704	4.59828	0.111595	0.450865	up	0	0	0	2	0	0	0	0	0	0	8.92316	8.92316	8.92316	9.88598	8.92316	8.92316	8.92316	8.92316	8.92316	8.92316	chr7	116359995	116363442	-		novel	NM_011083	Pik3c2a	exonic	475
chrX:74303982-74304188+	2.00782	8.97941	4.76147	0.111595	0.450865	up	0	0	0	2	0	0	0	0	0	0	8.92316	8.92316	8.92316	9.88598	8.92316	8.92316	8.92316	8.92316	8.92316	8.92316	chrX	74303981	74304188	+		novel	NM_018794	Atp6ap1	sense overlapping	207
chr18:36299046-36299432+	2.00782	8.95773	5.25708	0.111595	0.450865	up	0	0	0	2	0	0	0	0	0	0	8.92316	8.92316	8.92316	9.88598	8.92316	8.92316	8.92316	8.92316	8.92316	8.92316	chr18	36299045	36299432	+		novel	ENSMUST00000051301	Pura	sense overlapping	387
chr13:94997056-95005842+	2.00782	8.95773	5.25708	0.111595	0.450865	up	0	0	0	2	0	0	0	0	0	0	8.92316	8.92316	8.92316	9.88598	8.92316	8.92316	8.92316	8.92316	8.92316	8.92316	chr13	94997055	95005842	+		novel	NM_172590	Wdr41	exonic	307
chr2:34690462-34695608-	2.00782	8.95773	5.25708	0.111595	0.450865	up	0	0	0	2	0	0	0	0	0	0	8.92316	8.92316	8.92316	9.88598	8.92316	8.92316	8.92316	8.92316	8.92316	8.92316	chr2	34690461	34695608	-	2_34551128_34545982_-5146|21.89|6|9	PMID:25714049	NM_025709	Gapvd1	exonic	523
chr17:80593091-80605884-	2.00782	8.95773	5.25708	0.111595	0.450865	up	0	0	0	2	0	0	0	0	0	0	8.92316	8.92316	8.92316	9.88598	8.92316	8.92316	8.92316	8.92316	8.92316	8.92316	chr17	80593090	80605884	-		novel	NM_001290345	Map4k3	exonic	522
chr19:5842206-5842403-	2.00782	8.95773	5.25708	0.111595	0.450865	up	0	0	0	2	0	0	0	0	0	0	8.92316	8.92316	8.92316	9.88598	8.92316	8.92316	8.92316	8.92316	8.92316	8.92316	chr19	5842205	5842403	-		novel	NR_003513	Neat1	sense overlapping	198
chr18:53721623-53727744-	2.00782	8.95773	5.25708	0.111595	0.450865	up	0	0	0	2	0	0	0	0	0	0	8.92316	8.92316	8.92316	9.88598	8.92316	8.92316	8.92316	8.92316	8.92316	8.92316	chr18	53721622	53727744	-		novel	NM_178686	Cep120	exonic	827
chr2:52076081-52085178+	2.00782	8.95773	5.25708	0.111595	0.450865	up	0	0	0	2	0	0	0	0	0	0	8.92316	8.92316	8.92316	9.88598	8.92316	8.92316	8.92316	8.92316	8.92316	8.92316	chr2	52076080	52085178	+		novel	NM_175238	Rif1	exonic	915
chr9:108572373-108573766-	2.00782	8.95773	5.25708	0.111595	0.450865	up	0	0	0	2	0	0	0	0	0	0	8.92316	8.92316	8.92316	9.88598	8.92316	8.92316	8.92316	8.92316	8.92316	8.92316	chr9	108572372	108573766	-		novel	NM_031392	Wdr6	sense overlapping	1394
chr18:47331004-47331236-	2.00782	8.95773	5.25708	0.111595	0.450865	up	0	0	0	2	0	0	0	0	0	0	8.92316	8.92316	8.92316	9.88598	8.92316	8.92316	8.92316	8.92316	8.92316	8.92316	chr18	47331003	47331236	-		novel	ENSMUST00000019791	Sema6a	intronic	233
chr19:41923890-41928113-	2.00782	8.95773	5.25708	0.111595	0.450865	up	0	0	0	2	0	0	0	0	0	0	8.92316	8.92316	8.92316	9.88598	8.92316	8.92316	8.92316	8.92316	8.92316	8.92316	chr19	41923889	41928113	-		novel	NM_025644	Exosc1	sense overlapping	4224
chr7:102191903-102195888-	2.00782	8.99064	4.52347	0.111595	0.450865	up	0	0	0	2	0	0	0	0	0	0	8.92316	8.92316	8.92316	9.88598	8.92316	8.92316	8.92316	8.92316	8.92316	8.92316	chr7	102191902	102195888	-		novel	NM_022979	Nup98	exonic	523
chr4:134284246-134284547-	2.00782	8.95773	5.25708	0.111595	0.450865	up	0	0	0	2	0	0	0	0	0	0	8.92316	8.92316	8.92316	9.88598	8.92316	8.92316	8.92316	8.92316	8.92316	8.92316	chr4	134284245	134284547	-		novel	NM_146156	Pdik1l	exonic	302
chr9:42970993-43027295-	2.00782	8.95773	5.25708	0.111595	0.450865	up	0	0	0	2	0	0	0	0	0	0	8.92316	8.92316	8.92316	9.88598	8.92316	8.92316	8.92316	8.92316	8.92316	8.92316	chr9	42970992	43027295	-		novel	NM_027144	Arhgef12	exonic	4355
chr8:127078927-127154184+	2.00782	8.95773	5.25708	0.111595	0.450865	up	0	0	0	2	0	0	0	0	0	0	8.92316	8.92316	8.92316	9.88598	8.92316	8.92316	8.92316	8.92316	8.92316	8.92316	chr8	127078926	127154184	+		novel	ENSMUST00000026921	Pard3	intronic	75258
chr15:86151535-86156651-	2.00782	8.95773	5.25708	0.111595	0.450865	up	0	0	0	2	0	0	0	0	0	0	8.92316	8.92316	8.92316	9.88598	8.92316	8.92316	8.92316	8.92316	8.92316	8.92316	chr15	86151534	86156651	-	15_85987081_85981965_-5116|17.11|2|2	PMID:25714049	NM_145475	Cerk	exonic	285
chr7:110438840-110464707-	2.00782	8.99415	4.45139	0.111595	0.450865	up	0	0	0	2	0	0	0	0	0	0	8.92316	8.92316	8.92316	9.88598	8.92316	8.92316	8.92316	8.92316	8.92316	8.92316	chr7	110438839	110464707	-	7_117608221_117582354_-25867|20.99|3|4	PMID:25714049	NM_177324	Sbf2	exonic	1113
chrX:142834960-142835627+	2.00782	8.95773	5.25708	0.111595	0.450865	up	0	0	0	2	0	0	0	0	0	0	8.92316	8.92316	8.92316	9.88598	8.92316	8.92316	8.92316	8.92316	8.92316	8.92316	chrX	142834959	142835627	+		novel	ENSMUST00000112889	Tmem164	intronic	668
chr9:64835286-64862502+	2.00782	8.95773	5.25708	0.111595	0.450865	up	0	0	0	2	0	0	0	0	0	0	8.92316	8.92316	8.92316	9.88598	8.92316	8.92316	8.92316	8.92316	8.92316	8.92316	chr9	64835285	64862502	+		novel	NM_001162917	Dennd4a	exonic	1706
chr3:109161286-109166659+	2.00782	8.95773	5.25708	0.111595	0.450865	up	0	0	0	2	0	0	0	0	0	0	8.92316	8.92316	8.92316	9.88598	8.92316	8.92316	8.92316	8.92316	8.92316	8.92316	chr3	109161285	109166659	+		novel	NM_172685	Slc25a24	sense overlapping	5374
chr2:22340114-22362143+	2.00782	8.97417	4.87672	0.111595	0.450865	up	0	0	0	2	0	0	0	0	0	0	8.92316	8.92316	8.92316	9.88598	8.92316	8.92316	8.92316	8.92316	8.92316	8.92316	chr2	22340113	22362143	+		novel	NM_148413	Myo3a	exonic	417
chr17:65854819-65855145-	2.00782	8.95773	5.25708	0.111595	0.450865	up	0	0	0	2	0	0	0	0	0	0	8.92316	8.92316	8.92316	9.88598	8.92316	8.92316	8.92316	8.92316	8.92316	8.92316	chr17	65854818	65855145	-		novel	ENSMUST00000024905	Ralbp1	intronic	327
chr13:24812667-24813228+	2.00782	8.95773	5.25708	0.111595	0.450865	up	0	0	0	2	0	0	0	0	0	0	8.92316	8.92316	8.92316	9.88598	8.92316	8.92316	8.92316	8.92316	8.92316	8.92316	chr13	24812666	24813228	+		novel	NM_024473	BC005537	sense overlapping	562
chr2:24836396-24863908-	2.00782	8.95773	5.25708	0.111595	0.450865	up	0	0	0	2	0	0	0	0	0	0	8.92316	8.92316	8.92316	9.88598	8.92316	8.92316	8.92316	8.92316	8.92316	8.92316	chr2	24836395	24863908	-		novel	NM_172545	Ehmt1	exonic	1538
chr12:91643849-91644919-	2.00782	8.95773	5.25708	0.111595	0.450865	up	0	0	0	2	0	0	0	0	0	0	8.92316	8.92316	8.92316	9.88598	8.92316	8.92316	8.92316	8.92316	8.92316	8.92316	chr12	91643848	91644919	-		novel	ENSMUST00000052969	Ston2	intronic	1071
chr2:155395720-155402740-	2.00773	9.00146	4.34203	0.111595	0.450865	up	0	0	0	2	0	0	0	0	0	0	8.92316	8.92316	8.92316	9.88598	8.92316	8.92316	8.92316	8.92316	8.92316	8.92316	chr2	155395719	155402740	-	2_155228476_155221456_-7020|13.27|8|15	PMID:25714049	NM_019825	Ncoa6	exonic	258
chr2:156074176-156079464-	2.00769	9.00324	4.30346	0.111595	0.450865	up	0	0	0	2	0	0	0	0	0	0	8.92316	8.92316	8.92316	9.88598	8.92316	8.92316	8.92316	8.92316	8.92316	8.92316	chr2	156074175	156079464	-	2_155905200_155899912_-5288|21.47|4|5	PMID:25714049	NM_170588	Cpne1	exonic	1233
chr16:55980595-55991618+	2.00766	9.00428	4.28084	0.111595	0.450865	up	0	0	0	2	0	0	0	0	0	0	8.92316	8.92316	8.92316	9.88598	8.92316	8.92316	8.92316	8.92316	8.92316	8.92316	chr16	55980594	55991618	+	16_55991731_55980708_-11023|16.54|6|9	PMID:25714049	NM_173026	Zbtb11	exonic	1481
chr17:12920740-12922732+	2.00761	9.00655	4.23172	0.111595	0.450865	up	0	0	0	2	0	0	0	0	0	0	8.92316	8.92316	8.92316	9.88598	8.92316	8.92316	8.92316	8.92316	8.92316	8.92316	chr17	12920739	12922732	+	17_13115598_13113606_-1992|16.59|8|10	PMID:25714049	NM_013686	Tcp1	exonic	427
chr11:100370879-100371150-	2.00756	9.00902	4.17872	0.111595	0.450865	up	0	0	0	2	0	0	0	0	0	0	8.92316	8.92316	8.92316	9.88598	8.92316	8.92316	8.92316	8.92316	8.92316	8.92316	chr11	100370878	100371150	-		novel	NM_010593	Jup	sense overlapping	272
chr2:132544392-132547719-	2.00756	9.00907	4.17755	0.111595	0.450865	up	0	0	0	2	0	0	0	0	0	0	8.92316	8.92316	8.92316	9.88598	8.92316	8.92316	8.92316	8.92316	8.92316	8.92316	chr2	132544391	132547719	-	2_132373455_132370128_-3327|18.41|9|12	PMID:25714049	NM_027096	Gpcpd1	exonic	351
chr18:61140791-61157761-	2.00756	9.00918	4.17524	0.111595	0.450865	up	0	0	0	2	0	0	0	0	0	0	8.92316	8.92316	8.92316	9.88598	8.92316	8.92316	8.92316	8.92316	8.92316	8.92316	chr18	61140790	61157761	-	18_61317415_61300445_-16970|21.93|4|5	PMID:25714049	NM_134134	Hmgxb3	exonic	1590
chr5:90278243-90304065-	2.00756	9.00921	4.17467	0.111595	0.450865	up	0	0	0	2	0	0	0	0	0	0	8.92316	8.92316	8.92316	9.88598	8.92316	8.92316	8.92316	8.92316	8.92316	8.92316	chr5	90278242	90304065	-	5_90733090_90707268_-25822|20.58|7|12	PMID:25714049	NM_030886	Ankrd17	exonic	2841
chr5:135056842-135060830-	2.00754	9.00981	4.16178	0.111595	0.450865	up	0	0	0	2	0	0	0	0	0	0	8.92316	8.92316	8.92316	9.88598	8.92316	8.92316	8.92316	8.92316	8.92316	8.92316	chr5	135056841	135060830	-	5_135536700_135532712_-3988|19.14|6|7	PMID:25714049	NM_025375	Wbscr22	exonic	331
chr7:114240625-114245516-	2.00754	9.01016	4.15427	0.111595	0.450865	up	0	0	0	2	0	0	0	0	0	0	8.92316	8.92316	8.92316	9.88598	8.92316	8.92316	8.92316	8.92316	8.92316	8.92316	chr7	114240624	114245516	-		novel	NM_033370	Copb1	exonic	231
chr2:20859881-20861110-	2.00752	9.01103	4.13575	0.111595	0.450865	up	0	0	0	2	0	0	0	0	0	0	8.92316	8.92316	8.92316	9.88598	8.92316	8.92316	8.92316	8.92316	8.92316	8.92316	chr2	20859880	20861110	-	mmu_circ_0009709	circBase	ENSMUST00000173784	Arhgap21	exonic	439
chr16:33540852-33551114+	2.00751	8.9947	4.43956	0.111595	0.450865	up	0	1	0	0	1	0	0	0	0	0	8.92316	9.47834	8.92316	8.92316	9.48822	8.92316	8.92316	8.92316	8.92316	8.92316	chr16	33540851	33551114	+		novel	NM_134251	Slc12a8	exonic	424
chr9:102848079-102848305+	2.00751	8.99154	4.50412	0.111595	0.450865	up	0	1	0	0	1	0	0	0	0	0	8.92316	9.47834	8.92316	8.92316	9.48822	8.92316	8.92316	8.92316	8.92316	8.92316	chr9	102848078	102848305	+		novel	ENSMUST00000035142	Ryk	intronic	227
chr12:105671476-105675013-	2.00751	8.99143	4.50639	0.111595	0.450865	up	0	1	0	0	1	0	0	0	0	0	8.92316	9.47834	8.92316	8.92316	9.48822	8.92316	8.92316	8.92316	8.92316	8.92316	chr12	105671475	105675013	-	12_106913223_106909686_-3537|13.98|2|2	PMID:25714049	NM_029654	Atg2b	exonic	316
chr17:50756627-50800195-	2.0075	9.01161	4.12353	0.111595	0.450865	up	0	0	0	2	0	0	0	0	0	0	8.92316	8.92316	8.92316	9.88598	8.92316	8.92316	8.92316	8.92316	8.92316	8.92316	chr17	50756626	50800195	-	17_50939520_50895952_-43568|14.89|13|17	PMID:25714049	NM_028162	Tbc1d5	exonic	593
chr7:37959255-37996721-	2.00743	9.0845	3.689	0.111595	0.450865	up	0	0	0	0	2	0	0	0	0	0	8.92316	8.92316	8.92316	8.92316	9.89321	8.92316	8.92316	8.92316	8.92316	8.92316	chr7	37959254	37996721	-	7_38781740_38744274_-37466|17.79|3|5	PMID:25714049	NM_011274	Uri1	sense overlapping	37467
chr14:26592233-26600524+	2.00727	9.00819	4.19581	0.111595	0.450865	up	0	1	0	0	1	0	0	0	0	0	8.92316	9.47834	8.92316	8.92316	9.48822	8.92316	8.92316	8.92316	8.92316	8.92316	chr14	26592232	26600524	+	14_27420010_27411719_-8291|19.78|3|4	PMID:25714049	NM_145969	Dennd6a	exonic	276
chr1:87334270-87365279+	2.00724	9.00942	4.16948	0.111595	0.450865	up	0	1	0	0	1	0	0	0	0	0	8.92316	9.47834	8.92316	8.92316	9.48822	8.92316	8.92316	8.92316	8.92316	8.92316	chr1	87334269	87365279	+	1_89261854_89230845_-31009|14.24|4|6	PMID:25714049	NM_146112	Gigyf2	exonic	374
chr5:3558473-3559698+	2.00723	9.00993	4.15872	0.111595	0.450865	up	0	1	0	0	1	0	0	0	0	0	8.92316	9.47834	8.92316	8.92316	9.48822	8.92316	8.92316	8.92316	8.92316	8.92316	chr5	3558472	3559698	+	5_3559698_3558473_-1225|18.99|10|12	PMID:25714049	NM_001042501	Fam133b	exonic	264
chr2:69965374-69993812+	2.00718	9.0121	4.11255	0.111595	0.450865	up	0	1	0	0	1	0	0	0	0	0	8.92316	9.47834	8.92316	8.92316	9.48822	8.92316	8.92316	8.92316	8.92316	8.92316	chr2	69965373	69993812	+	2_69831869_69803431_-28438|15.11|3|4	PMID:25714049	NM_177783	Ubr3	exonic	1704
chr15:35652255-35674952+	2.00718	9.01215	4.11143	0.111595	0.450865	up	0	1	0	0	1	0	0	0	0	0	8.92316	9.47834	8.92316	8.92316	9.48822	8.92316	8.92316	8.92316	8.92316	8.92316	chr15	35652254	35674952	+		novel	NM_177151	Vps13b	exonic	587
chr10:84667322-84699541+	2.00714	9.01205	4.11345	0.111595	0.450865	up	0	1	1	0	0	0	0	0	0	0	8.92316	9.47834	9.48818	8.92316	8.92316	8.92316	8.92316	8.92316	8.92316	8.92316	chr10	84667321	84699541	+		novel	NM_027423	Polr3b	exonic	1612
chr1:190798652-190810121-	2.0071	9.01848	4.06047	0.111595	0.450865	up	0	0	0	2	0	0	0	0	0	0	8.92316	8.92316	8.92316	9.88598	8.92316	8.92316	8.92316	8.92316	8.92316	8.92316	chr1	190798651	190810121	-		novel	NM_178775	Rps6kc1	exonic	1840
chr17:87020401-87023913-	2.00687	9.05855	3.89584	0.111595	0.450865	up	0	0	1	1	0	0	0	0	0	0	8.92316	8.92316	9.48818	9.48344	8.92316	8.92316	8.92316	8.92316	8.92316	8.92316	chr17	87020400	87023913	-	17_87423253_87419741_-3512|17.18|10|17	PMID:25714049	NM_008838	Pigf	exonic	458
chr8:80821834-80823280-	2.00672	9.09021	3.62959	0.111595	0.450865	up	0	0	0	0	2	0	0	0	0	0	8.92316	8.92316	8.92316	8.92316	9.89321	8.92316	8.92316	8.92316	8.92316	8.92316	chr8	80821833	80823280	-		novel	ENSMUST00000034150	Gab1	intronic	1447
chr4:145318524-145321793-	2.00647	9.02401	4.08815	0.111595	0.450865	up	0	0	0	2	0	0	0	0	0	0	8.92316	8.92316	8.92316	9.88598	8.92316	8.92316	8.92316	8.92316	8.92316	8.92316	chr4	145318523	145321793	-		novel			intergenic	3270
chr9:114705054-114709314+	2.00647	9.02133	4.07769	0.111595	0.450865	up	0	1	0	0	1	0	0	0	0	0	8.92316	9.47834	8.92316	8.92316	9.48822	8.92316	8.92316	8.92316	8.92316	8.92316	chr9	114705053	114709314	+	9_114618432_114614172_-4260|13.88|13|37	PMID:25714049	NM_146229	Dync1li1	exonic	518
chr12:78590534-78637579+	2.00638	9.06315	3.86426	0.111595	0.450865	up	0	0	0	1	1	0	0	0	0	0	8.92316	8.92316	8.92316	9.48344	9.48822	8.92316	8.92316	8.92316	8.92316	8.92316	chr12	78590533	78637579	+	mmu_circ_0000395	circBase	NM_145965	Gphn	exonic	742
chr4:76128485-76140702-	2.00634	9.02514	4.0904	0.111595	0.450865	up	0	0	0	2	0	0	0	0	0	0	8.92316	8.92316	8.92316	9.88598	8.92316	8.92316	8.92316	8.92316	8.92316	8.92316	chr4	76128484	76140702	-	4_75786606_75774389_-12217|21.11|4|4	PMID:25714049	NM_011211	Ptprd	exonic	1191
chr5:137149423-137149707-	2.00629	9.02556	4.09095	0.111595	0.450865	up	0	0	0	2	0	0	0	0	0	0	8.92316	8.92316	8.92316	9.88598	8.92316	8.92316	8.92316	8.92316	8.92316	8.92316	chr5	137149422	137149707	-		novel			intergenic	285
chr7:28103909-28154545+	2.00626	9.02281	4.08383	0.111595	0.450865	up	0	1	1	0	0	0	0	0	0	0	8.92316	9.47834	9.48818	8.92316	8.92316	8.92316	8.92316	8.92316	8.92316	8.92316	chr7	28103908	28154545	+		novel	NM_001122603	Fcgbp	sense overlapping	50637
chr10:81532396-81533406-	2.00609	9.09584	3.56025	0.111595	0.450865	up	0	0	2	0	0	0	0	0	0	0	8.92316	8.92316	9.89315	8.92316	8.92316	8.92316	8.92316	8.92316	8.92316	8.92316	chr10	81532395	81533406	-	10_80996151_80995141_-1010|16.59|7|17	PMID:25714049	NM_010301	Gna11	exonic	284
chr3:85720416-85741374-	2.00606	9.09618	3.55595	0.111595	0.450865	up	0	0	2	0	0	0	0	0	0	0	8.92316	8.92316	9.89315	8.92316	8.92316	8.92316	8.92316	8.92316	8.92316	8.92316	chr3	85720415	85741374	-	3_85545296_85524338_-20958|15.26|2|3	PMID:25714049	NM_172682	Fam160a1	exonic	1097
chr13:8819863-8849669-	2.00601	9.02538	4.09012	0.111595	0.450865	up	0	1	0	0	1	0	0	0	0	0	8.92316	9.47834	8.92316	8.92316	9.48822	8.92316	8.92316	8.92316	8.92316	8.92316	chr13	8819862	8849669	-	13_8848915_8819109_-29806|18.66|10|19	PMID:25714049	NM_172445	Wdr37	exonic	963
chr1:54723014-54729874-	2.00581	9.02722	4.09117	0.111595	0.450865	up	0	1	0	0	1	0	0	0	0	0	8.92316	9.47834	8.92316	8.92316	9.48822	8.92316	8.92316	8.92316	8.92316	8.92316	chr1	54723013	54729874	-	1_54786718_54779858_-6860|21.68|4|4	PMID:25714049	NM_001081433	Ankrd44	exonic	334
chr4:9474898-9517734-	2.00575	9.0306	4.08688	0.111595	0.450865	up	0	0	0	2	0	0	0	0	0	0	8.92316	8.92316	8.92316	9.88598	8.92316	8.92316	8.92316	8.92316	8.92316	8.92316	chr4	9474897	9517734	-		novel	NM_023066	Asph	exonic	689
chr1:39564048-39565332-	2.00566	9.10092	3.51633	0.111595	0.450865	up	0	0	0	0	2	0	0	0	0	0	8.92316	8.92316	8.92316	8.92316	9.89321	8.92316	8.92316	8.92316	8.92316	8.92316	chr1	39564047	39565332	-	1_39622177_39620893_-1284|19.08|8|9	PMID:25714049	NM_001033135	Rnf149	exonic	320
chr7:131094707-131097668+	2.0056	9.02888	4.08976	0.111595	0.450865	up	0	1	1	0	0	0	0	0	0	0	8.92316	9.47834	9.48818	8.92316	8.92316	8.92316	8.92316	8.92316	8.92316	8.92316	chr7	131094706	131097668	+		novel	NM_007769	Dmbt1	exonic	378
chr7:98251890-98266247-	2.00505	9.10753	3.47326	0.111595	0.450865	up	0	0	0	0	2	0	0	0	0	0	8.92316	8.92316	8.92316	8.92316	9.89321	8.92316	8.92316	8.92316	8.92316	8.92316	chr7	98251889	98266247	-	7_105414757_105400400_-14357|20.25|20|74	PMID:25714049	NM_025408	Acer3	exonic	335
chr5:90946790-91000619+	2.005	9.07547	3.7628	0.111595	0.450865	up	0	0	0	1	1	0	0	0	0	0	8.92316	8.92316	8.92316	9.48344	9.48822	8.92316	8.92316	8.92316	8.92316	8.92316	chr5	90946789	91000619	+		novel	NM_026788	Mthfd2l	exonic	788
chr7:90348427-90360177+	2.00481	9.10968	3.45848	0.111595	0.450865	up	0	0	2	0	0	0	0	0	0	0	8.92316	8.92316	9.89315	8.92316	8.92316	8.92316	8.92316	8.92316	8.92316	8.92316	chr7	90348426	90360177	+		novel	NM_031394	Sytl2	exonic	751
chr5:3575623-3577344+	2.00469	9.07772	3.74453	0.111595	0.450865	up	0	0	1	1	0	0	0	0	0	0	8.92316	8.92316	9.48818	9.48344	8.92316	8.92316	8.92316	8.92316	8.92316	8.92316	chr5	3575622	3577344	+	5_3577344_3575623_-1721|15.29|16|28	PMID:25714049	NM_029843	1700109H08Rik	exonic	261
chr5:66362718-66392335-	2.00457	9.04213	4.01725	0.111595	0.450865	up	0	0	0	2	0	0	0	0	0	0	8.92316	8.92316	8.92316	9.88598	8.92316	8.92316	8.92316	8.92316	8.92316	8.92316	chr5	66362717	66392335	-	5_66783574_66753957_-29617|13.24|15|50	PMID:25714049	NM_001201413	Apbb2	exonic	485
chr4:74271194-74315649+	2.00454	9.11326	3.43374	0.111595	0.450865	up	0	0	0	0	2	0	0	0	0	0	8.92316	8.92316	8.92316	8.92316	9.89321	8.92316	8.92316	8.92316	8.92316	8.92316	chr4	74271193	74315649	+	4_73961553_73917098_-44455|21.19|8|9	PMID:25714049	NM_144787	Kdm4c	exonic	777
chr3:158016322-158026858-	2.0045	9.03956	4.03802	0.111595	0.450865	up	0	1	1	0	0	0	0	0	0	0	8.92316	9.47834	9.48818	8.92316	8.92316	8.92316	8.92316	8.92316	8.92316	8.92316	chr3	158016321	158026858	-	3_157689822_157679286_-10536|19.07|9|13	PMID:25714049	NM_001093752	Srsf11	exonic	729
chr12:4891315-4894679-	2.00448	9.07976	3.72696	0.111595	0.450865	up	0	0	0	1	1	0	0	0	0	0	8.92316	8.92316	8.92316	9.48344	9.48822	8.92316	8.92316	8.92316	8.92316	8.92316	chr12	4891314	4894679	-	mmu_circ_0004003	circBase	NM_145441	Ubxn2a	exonic	249
chr1:13160161-13167106-	2.00428	9.04215	4.01646	0.111595	0.450865	up	0	1	0	0	1	0	0	0	0	0	8.92316	9.47834	8.92316	8.92316	9.48822	8.92316	8.92316	8.92316	8.92316	8.92316	chr1	13160160	13167106	-	1_13157187_13150242_-6945|18.65|2|3	PMID:25714049	NM_008678	Ncoa2	exonic	764
chr7:114046647-114060419-	2.00428	9.04182	4.01932	0.111595	0.450865	up	0	1	1	0	0	0	0	0	0	0	8.92316	9.47834	9.48818	8.92316	8.92316	8.92316	8.92316	8.92316	8.92316	8.92316	chr7	114046646	114060419	-	7_121203933_121190161_-13772|16.53|6|11	PMID:25714049	NM_025846	Rras2	sense overlapping	13773
chr2:127284095-127284581+	2.00424	9.04264	4.01206	0.111595	0.450865	up	0	1	0	0	1	0	0	0	0	0	8.92316	9.47834	8.92316	8.92316	9.48822	8.92316	8.92316	8.92316	8.92316	8.92316	chr2	127284094	127284581	+	2_127110317_127109831_-486|21.63|9|11	PMID:25714049	NM_139308	Stard7	exonic	259
chrX:108803982-108805597-	2.00399	9.0453	3.98628	0.111595	0.450865	up	0	1	0	0	1	0	0	0	0	0	8.92316	9.47834	8.92316	8.92316	9.48822	8.92316	8.92316	8.92316	8.92316	8.92316	chrX	108803981	108805597	-	X_106000936_105999321_-1615|16.71|7|9	PMID:25714049	NM_001081477	Brwd3	exonic	383
chr4:138096752-138105436+	2.00376	9.08582	3.66904	0.111595	0.450865	up	0	0	1	1	0	0	0	0	0	0	8.92316	8.92316	9.48818	9.48344	8.92316	8.92316	8.92316	8.92316	8.92316	8.92316	chr4	138096751	138105436	+	4_137661351_137652667_-8684|18.88|10|16	PMID:25714049	NM_172703	Eif4g3	exonic	516
chr15:98592127-98604732-	2.00328	9.05583	3.90371	0.111595	0.450865	up	0	0	0	2	0	0	0	0	0	0	8.92316	8.92316	8.92316	9.88598	8.92316	8.92316	8.92316	8.92316	8.92316	8.92316	chr15	98592126	98604732	-	15_98435163_98422558_-12605|12.97|4|6	PMID:25714049	NM_007405	Adcy6	sense overlapping	12606
chr9:76502109-76503182-	2.00323	9.05629	3.90127	0.111595	0.450865	up	0	0	0	2	0	0	0	0	0	0	8.92316	8.92316	8.92316	9.88598	8.92316	8.92316	8.92316	8.92316	8.92316	8.92316	chr9	76502108	76503182	-	9_76350989_76349916_-1073|23.45|2|2	PMID:25714049	NM_001045518	Fam83b	exonic	290
chr1:78681593-78682010+	2.0032	9.0566	3.89956	0.111595	0.450865	up	0	0	0	2	0	0	0	0	0	0	8.92316	8.92316	8.92316	9.88598	8.92316	8.92316	8.92316	8.92316	8.92316	8.92316	chr1	78681592	78682010	+		novel	NM_028817	Acsl3	exonic	418
chr4:88229323-88232782+	2.00314	9.09173	3.60511	0.111595	0.450865	up	0	0	1	1	0	0	0	0	0	0	8.92316	8.92316	9.48818	9.48344	8.92316	8.92316	8.92316	8.92316	8.92316	8.92316	chr4	88229322	88232782	+	4_87878686_87875227_-3459|16.81|7|7	PMID:25714049	NM_001081184	Focad	exonic	465
chr4:130668925-130669298+	2.00313	9.05725	3.89591	0.111595	0.450865	up	0	0	0	2	0	0	0	0	0	0	8.92316	8.92316	8.92316	9.88598	8.92316	8.92316	8.92316	8.92316	8.92316	8.92316	chr4	130668924	130669298	+	mmu_circ_0001270	circBase	NM_030722	Pum1	exonic	374
chr5:36519273-36543297-	2.00304	9.09282	3.59171	0.111595	0.450865	up	0	0	1	1	0	0	0	0	0	0	8.92316	8.92316	9.48818	9.48344	8.92316	8.92316	8.92316	8.92316	8.92316	8.92316	chr5	36519272	36543297	-	5_36885946_36861922_-24024|24.33|7|12	PMID:25714049	NM_133910	Tbc1d14	exonic	548
chr11:77691973-77692356+	2.00283	8.99075	4.51081	0.111595	0.450865	up	0	1	0	1	0	0	0	0	0	0	8.92316	9.47834	8.92316	9.48344	8.92316	8.92316	8.92316	8.92316	8.92316	8.92316	chr11	77691972	77692356	+		novel	NM_001024205	Nufip2	sense overlapping	384
chr5:86012261-86022483-	2.00261	9.00938	4.16152	0.111595	0.450865	up	0	1	0	1	0	0	0	0	0	0	8.92316	9.47834	8.92316	9.48344	8.92316	8.92316	8.92316	8.92316	8.92316	8.92316	chr5	86012260	86022483	-		novel	NM_007683	Cenpc1	sense overlapping	10223
chr10:93862377-93868961-	2.00261	9.05981	3.87969	0.111595	0.450865	up	0	1	0	0	1	0	0	0	0	0	8.92316	9.47834	8.92316	8.92316	9.48822	8.92316	8.92316	8.92316	8.92316	8.92316	chr10	93862376	93868961	-	10_93331706_93325122_-6584|20.36|4|4	PMID:25714049	NM_019648	Metap2	exonic	412
chr10:4413309-4427691-	2.00255	9.01242	4.097	0.111595	0.450865	up	0	1	0	1	0	0	0	0	0	0	8.92316	9.47834	8.92316	9.48344	8.92316	8.92316	8.92316	8.92316	8.92316	8.92316	chr10	4413308	4427691	-		novel	NM_025343	Rmnd1	exonic	954
chr1:84743094-84747329-	2.00251	9.06365	3.85296	0.111595	0.450865	up	0	0	0	2	0	0	0	0	0	0	8.92316	8.92316	8.92316	9.88598	8.92316	8.92316	8.92316	8.92316	8.92316	8.92316	chr1	84743093	84747329	-		novel	NM_133975	Trip12	exonic	727
chr15:82022445-82023061+	2.002	9.06619	3.83217	0.111595	0.450865	up	0	1	0	0	1	0	0	0	0	0	8.92316	9.47834	8.92316	8.92316	9.48822	8.92316	8.92316	8.92316	8.92316	8.92316	chr15	82022444	82023061	+	15_81853491_81852875_-616|12.92|9|13	PMID:25714049	NM_010247	Xrcc6	exonic	394
chr2:112344488-112358639+	2.00187	9.14979	3.15701	0.111595	0.450865	up	0	0	0	0	2	0	0	0	0	0	8.92316	8.92316	8.92316	8.92316	9.89321	8.92316	8.92316	8.92316	8.92316	8.92316	chr2	112344487	112358639	+	mmu_circ_0009177	circBase	NM_133648	Slc12a6	exonic	1770
chr4:149206718-149222364-	2.00185	9.15012	3.15533	0.111595	0.450865	up	0	0	0	0	2	0	0	0	0	0	8.92316	8.92316	8.92316	8.92316	9.89321	8.92316	8.92316	8.92316	8.92316	8.92316	chr4	149206717	149222364	-	4_148596473_148580827_-15646|16.79|8|8	PMID:25714049	NM_207682	Kif1b	exonic	1151
chr4:47383749-47396585+	2.0017	9.06951	3.80333	0.111595	0.450865	up	0	1	0	0	1	0	0	0	0	0	8.92316	9.47834	8.92316	8.92316	9.48822	8.92316	8.92316	8.92316	8.92316	8.92316	chr4	47383748	47396585	+	4_47409457_47396621_-12836|17.66|6|9	PMID:25714049	NM_009370	Tgfbr1	exonic	720
chr5:137313351-137313708-	2.00169	9.10898	3.45754	0.111595	0.450865	up	0	0	1	1	0	0	0	0	0	0	8.92316	8.92316	9.48818	9.48344	8.92316	8.92316	8.92316	8.92316	8.92316	8.92316	chr5	137313350	137313708	-		novel	NM_011639	Trip6	exonic	254
chr18:82668572-82682287-	2.00156	9.11099	3.4439	0.111595	0.450865	up	0	0	0	1	1	0	0	0	0	0	8.92316	8.92316	8.92316	9.48344	9.48822	8.92316	8.92316	8.92316	8.92316	8.92316	chr18	82668571	82682287	-	mmu_circ_0000907	circBase	NM_177832	Zfp236	exonic	785
chr9:121364001-121392051+	2.00153	9.1114	3.44103	0.111595	0.450865	up	0	0	0	1	1	0	0	0	0	0	8.92316	8.92316	8.92316	9.48344	9.48822	8.92316	8.92316	8.92316	8.92316	8.92316	chr9	121364000	121392051	+	9_121301169_121273119_-28050|20.35|8|15	PMID:25714049	uc009sda.1	Trak1	exonic	494
chr15:81624525-81627534+	2.00139	9.11291	3.43051	0.111595	0.450865	up	0	0	1	1	0	0	0	0	0	0	8.92316	8.92316	9.48818	9.48344	8.92316	8.92316	8.92316	8.92316	8.92316	8.92316	chr15	81624524	81627534	+		novel	NM_177821	Ep300	exonic	680
chr12:82384651-82387712+	2.00113	9.07762	3.73849	0.111595	0.450865	up	0	0	0	2	0	0	0	0	0	0	8.92316	8.92316	8.92316	9.88598	8.92316	8.92316	8.92316	8.92316	8.92316	8.92316	chr12	82384650	82387712	+	12_83488699_83485638_-3061|17.13|3|3	PMID:25714049	NM_172579	Sipa1l1	exonic	262
chr5:137149819-137150196-	2.00095	9.07661	3.74618	0.111595	0.450865	up	0	1	1	0	0	0	0	0	0	0	8.92316	9.47834	9.48818	8.92316	8.92316	8.92316	8.92316	8.92316	8.92316	8.92316	chr5	137149818	137150196	-		novel			intergenic	378
chr16:15912519-15915387-	2.00092	9.16498	3.07717	0.111595	0.450865	up	0	0	0	0	2	0	0	0	0	0	8.92316	8.92316	8.92316	8.92316	9.89321	8.92316	8.92316	8.92316	8.92316	8.92316	chr16	15912518	15915387	-	16_15915480_15912612_-2868|19.47|5|5	PMID:25714049	NM_146068	Spidr	exonic	289
chr8:109876803-109895641+	2.00074	9.16733	3.06423	0.111595	0.450865	up	0	0	2	0	0	0	0	0	0	0	8.92316	8.92316	9.89315	8.92316	8.92316	8.92316	8.92316	8.92316	8.92316	8.92316	chr8	109876802	109895641	+	8_112419541_112400703_-18838|16.83|5|8	PMID:25714049	NM_001122594	Phlpp2	exonic	415
chr14:73362961-73368427-	2.00069	9.12285	3.3577	0.111595	0.450865	up	0	0	0	1	1	0	0	0	0	0	8.92316	8.92316	8.92316	9.48344	9.48822	8.92316	8.92316	8.92316	8.92316	8.92316	chr14	73362960	73368427	-	14_73768234_73762768_-5466|20.39|12|17	PMID:25714049	NM_008410	Itm2b	sense overlapping	5467
chr6:58843604-58894624+	2.00049	9.0839	3.68152	0.111595	0.450865	up	0	0	0	2	0	0	0	0	0	0	8.92316	8.92316	8.92316	9.88598	8.92316	8.92316	8.92316	8.92316	8.92316	8.92316	chr6	58843603	58894624	+	6_58844618_58793598_-51020|13.30|11|24	PMID:25714049	NM_028705	Herc3	exonic	2686
chr6:120870766-120876346+	2.00033	9.1281	3.31714	0.111595	0.450865	up	0	0	0	1	1	0	0	0	0	0	8.92316	8.92316	8.92316	9.48344	9.48822	8.92316	8.92316	8.92316	8.92316	8.92316	chr6	120870765	120876346	+	mmu_circ_0001518	circBase	NM_153516	Bcl2l13	exonic	214
chr2:18122245-18146872+	1.99997	9.18193	2.98204	0.111595	0.450865	up	0	0	2	0	0	0	0	0	0	0	8.92316	8.92316	9.89315	8.92316	8.92316	8.92316	8.92316	8.92316	8.92316	8.92316	chr2	18122244	18146872	+	2_18068499_18043872_-24627|13.87|9|15	PMID:25714049	NM_010804	Mllt10	exonic	390
chr9:120453527-120464961+	1.99976	9.09187	3.59706	0.111595	0.450865	up	0	0	0	2	0	0	0	0	0	0	8.92316	8.92316	8.92316	9.88598	8.92316	8.92316	8.92316	8.92316	8.92316	8.92316	chr9	120453526	120464961	+	mmu_circ_0001858	circBase	NM_144557	Myrip	exonic	523
chr3:133137266-133149650-	1.99968	9.08986	3.62001	0.111595	0.450865	up	0	1	0	0	1	0	0	0	0	0	8.92316	9.47834	8.92316	8.92316	9.48822	8.92316	8.92316	8.92316	8.92316	8.92316	chr3	133137265	133149650	-		novel	ENSMUST00000147041	Arhgef38	exonic	868
chr16:32950292-32955405+	1.99956	9.09448	3.56489	0.111595	0.450865	up	0	0	0	2	0	0	0	0	0	0	8.92316	8.92316	8.92316	9.88598	8.92316	8.92316	8.92316	8.92316	8.92316	8.92316	chr16	32950291	32955405	+	mmu_circ_0000680	circBase	NM_001081255	Lrch3	exonic	378
chr11:98219074-98224631+	1.99928	9.09493	3.55887	0.111595	0.450865	up	0	1	0	0	1	0	0	0	0	0	8.92316	9.47834	8.92316	8.92316	9.48822	8.92316	8.92316	8.92316	8.92316	8.92316	chr11	98219073	98224631	+	11_98085945_98080388_-5557|16.29|4|6	PMID:25714049	NM_026952	Cdk12	exonic	678
chr9:72725017-72726530+	1.99871	9.1027	3.4927	0.111595	0.450865	up	0	1	0	0	1	0	0	0	0	0	8.92316	9.47834	8.92316	8.92316	9.48822	8.92316	8.92316	8.92316	8.92316	8.92316	chr9	72725016	72726530	+	mmu_circ_0001805	circBase	NM_010890	Nedd4	exonic	186
chr1:118866572-118890401-	1.99854	9.06207	3.85659	0.111595	0.450865	up	0	1	0	1	0	0	0	0	0	0	8.92316	9.47834	8.92316	9.48344	8.92316	8.92316	8.92316	8.92316	8.92316	8.92316	chr1	118866571	118890401	-	1_120786978_120763149_-23829|22.36|2|2	PMID:25714049	NM_001081125	Gli2	exonic	495
chr4:53127597-53133015-	1.99848	9.10941	3.44886	0.111595	0.450865	up	0	0	0	2	0	0	0	0	0	0	8.92316	8.92316	8.92316	9.88598	8.92316	8.92316	8.92316	8.92316	8.92316	8.92316	chr4	53127596	53133015	-	4_53145887_53140469_-5418|16.09|8|10	PMID:25714049	NM_013454	Abca1	exonic	355
chr11:77691542-77693254+	1.99846	9.15955	3.10188	0.111595	0.450865	up	0	0	0	1	1	0	0	0	0	0	8.92316	8.92316	8.92316	9.48344	9.48822	8.92316	8.92316	8.92316	8.92316	8.92316	chr11	77691541	77693254	+	mmu_circ_0000296	circBase	NM_001024205	Nufip2	exonic	1713
chr11:19998120-20018189+	1.99843	9.10676	3.46632	0.111595	0.450865	up	0	1	0	0	1	0	0	0	0	0	8.92316	9.47834	8.92316	8.92316	9.48822	8.92316	8.92316	8.92316	8.92316	8.92316	chr11	19998119	20018189	+	mmu_circ_0002867	circBase	NM_033523	Spred2	exonic	550
chr10:52544607-52545267-	1.99839	9.10698	3.46478	0.111595	0.450865	up	0	1	1	0	0	0	0	0	0	0	8.92316	9.47834	9.48818	8.92316	8.92316	8.92316	8.92316	8.92316	8.92316	8.92316	chr10	52544606	52545267	-		novel	NR_037920	Zfa-ps	sense overlapping	661
chr3:98290887-98291341+	1.99831	9.06502	3.8343	0.111595	0.450865	up	0	1	0	1	0	0	0	0	0	0	8.92316	9.47834	8.92316	9.48344	8.92316	8.92316	8.92316	8.92316	8.92316	8.92316	chr3	98290886	98291341	+	3_98095264_98094810_-454|16.97|2|2	PMID:25714049	NM_008256	Hmgcs2	exonic	455
chr10:28334476-28383724+	1.99826	9.10885	3.45222	0.111595	0.450865	up	0	1	1	0	0	0	0	0	0	0	8.92316	9.47834	9.48818	8.92316	8.92316	8.92316	8.92316	8.92316	8.92316	8.92316	chr10	28334475	28383724	+	10_28103530_28054282_-49248|23.61|9|10	PMID:25714049	NM_008983	Ptprk	exonic	667
chr4:72157463-72158417-	1.99783	8.95749	5.23881	0.111595	0.450865	up	0	2	0	0	0	0	0	0	0	0	8.92316	9.87826	8.92316	8.92316	8.92316	8.92316	8.92316	8.92316	8.92316	8.92316	chr4	72157462	72158417	-		novel	NM_011599	Tle1	exonic	222
chr2:155909353-155921727-	1.99783	8.97609	4.812	0.111595	0.450865	up	0	2	0	0	0	0	0	0	0	0	8.92316	9.87826	8.92316	8.92316	8.92316	8.92316	8.92316	8.92316	8.92316	8.92316	chr2	155909352	155921727	-		novel	NM_018888	Uqcc1	exonic	370
chr2:90684973-90723735+	1.99783	8.95749	5.23881	0.111595	0.450865	up	0	2	0	0	0	0	0	0	0	0	8.92316	9.87826	8.92316	8.92316	8.92316	8.92316	8.92316	8.92316	8.92316	8.92316	chr2	90684972	90723735	+		novel	NM_021512	Nup160	exonic	3221
chr11:62358855-62401267-	1.99783	8.95749	5.23881	0.111595	0.450865	up	0	2	0	0	0	0	0	0	0	0	8.92316	9.87826	8.92316	8.92316	8.92316	8.92316	8.92316	8.92316	8.92316	8.92316	chr11	62358854	62401267	-		novel	NM_011308	Ncor1	exonic	2221
[truncated: 2,976 more rows]

## Sheet: down_0_vs_3
Differentially expressed circRNAs for: down_0_vs_3 Fold Change cut-off: 1 P-value cut-off: 1 Column A: CircRNAID, the ID of the identified circRNA by DCC. Column B ~ G: edgeR results for differentially expressed circRNAs. Column H ~ Q: junction reads, the junction read number of each sample. Column R ~ AA: logCPM by edgeR. Column AA ~ AE: the coordinates of circRNA. Column AF: circBaseID, the ide…
[truncated: 3,353 more rows]

[truncated: 14 more sheets: up_3_vs_6, down_3_vs_6, up_6_vs_M, down_6_vs_M, up_N_vs_M, down_N_vs_M, up_M_vs_H, down_M_vs_H, up_M_vs_W, down_M_vs_W, up_M_vs_Q, down_M_vs_Q, up_0+3+6_vs_M, down_0+3+6_vs_M]
