# Supplementary material for: The circRNA expression profile of colorectal inflammatory cancer transformation revealed potential predictive biomarkers
Source: Aging (Albany NY). 2022 Nov 29;14(22):9280–99. doi: 10.18632/aging.204406 (PMC9740358; doi:10.18632/aging.204406)
Supplement: Supplementary Figures [file aging-14-204406-s003.pdf]

## SUPPLEMENTARY FIGURES

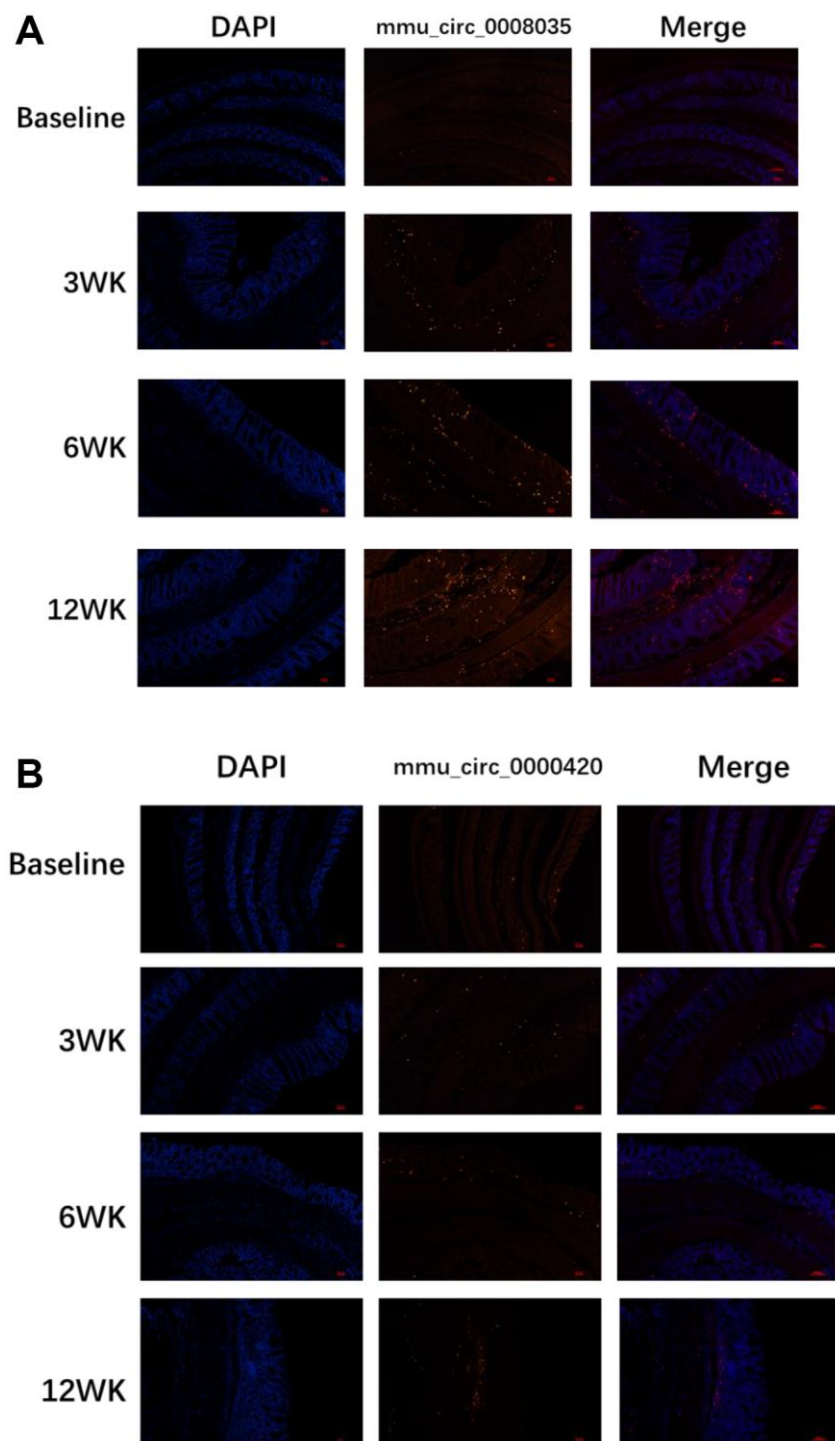

**Supplementary Figure 1. Fish assay of circRNA in inflammation-based tumorigenesis. (A)** The expression of mmu\_circ\_0008035 in mice colorectal tissues (X100); **(B)** The expression of mmu\_circ\_0000420 in mice colorectal tissues(X100).

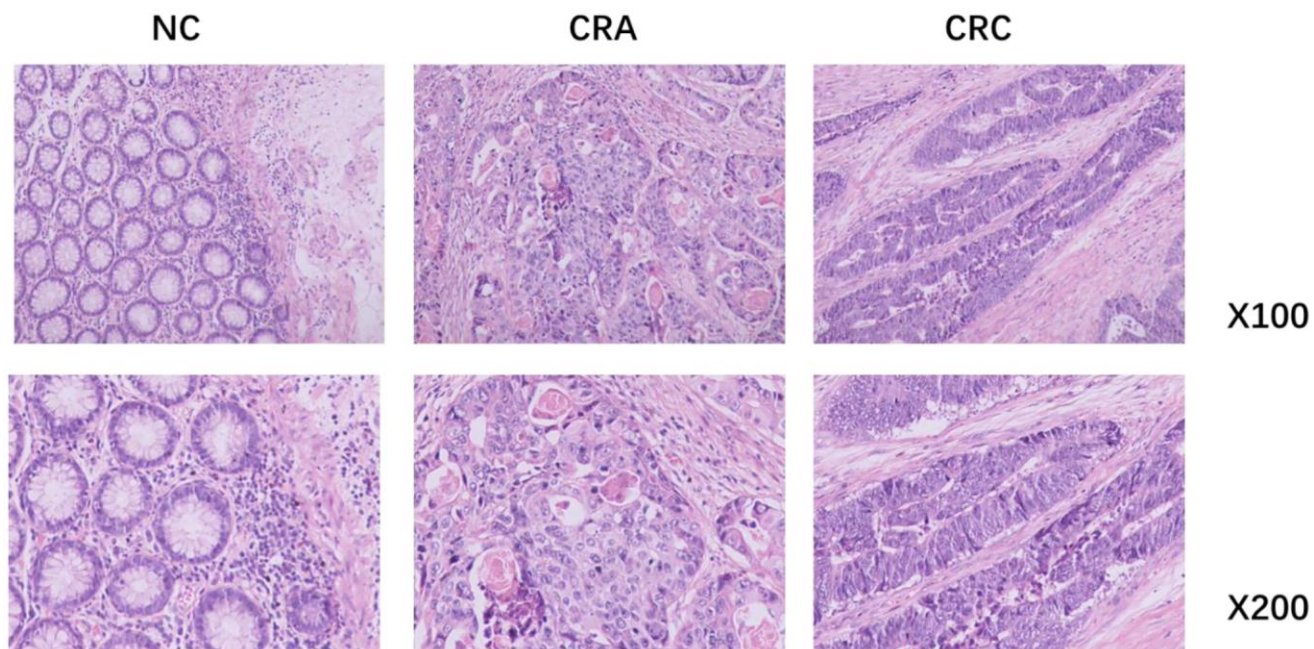

**Supplementary Figure 2.** HE staining of colorectal tissues from patients with paraneoplastic, colorectal adenoma, and colorectal tumors.

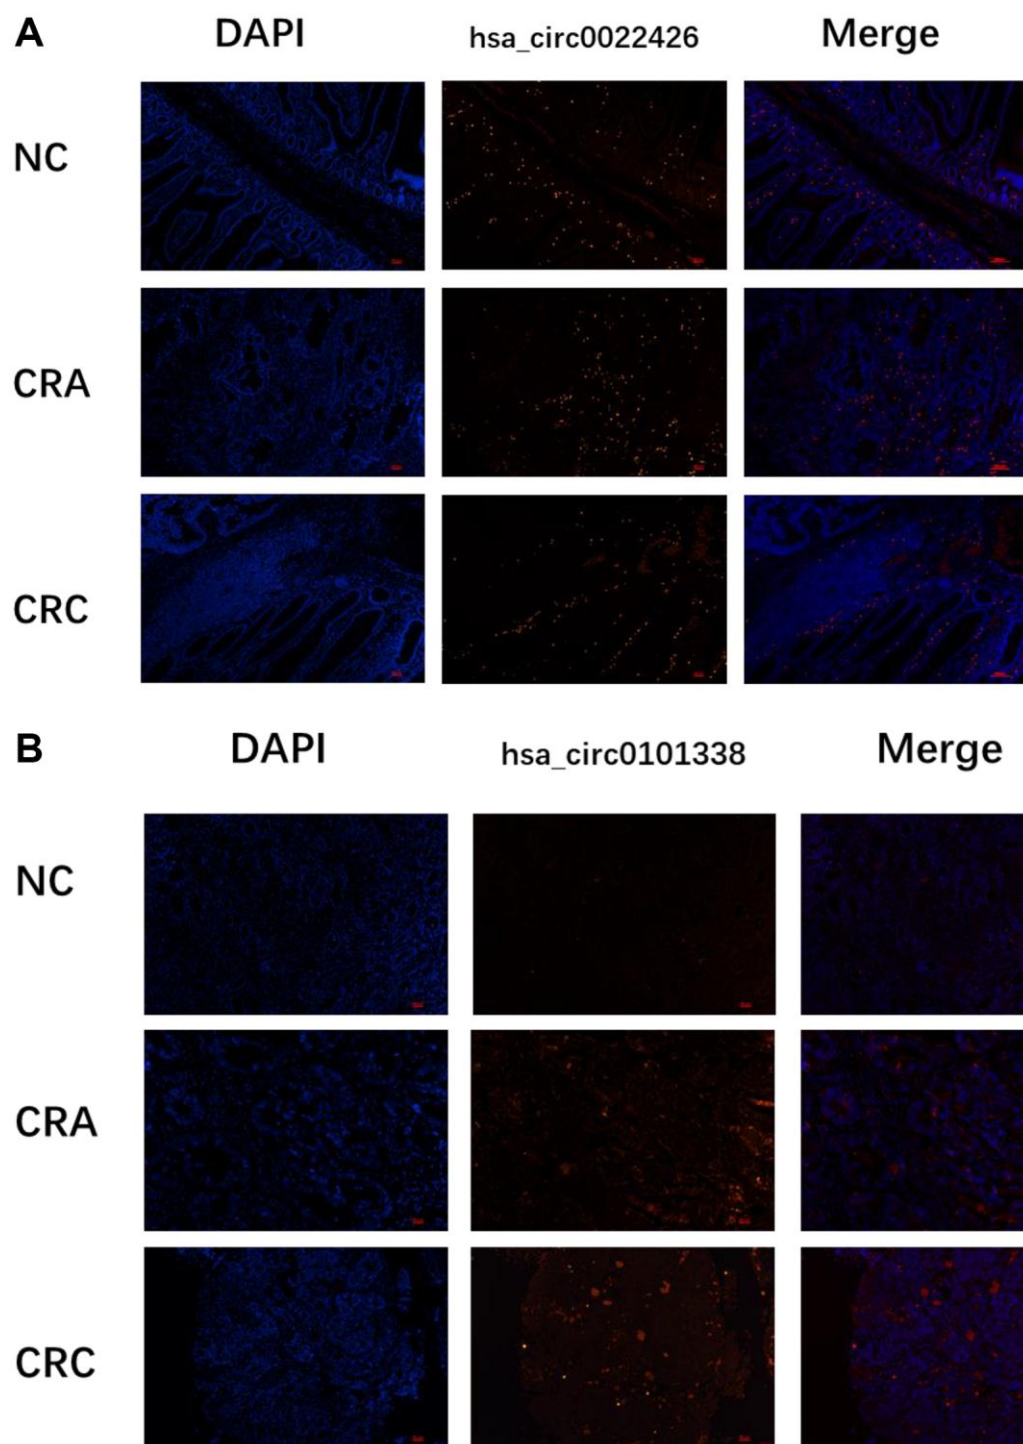

**Supplementary Figure 3. Fish assay of circRNA in CRA and CRC patients.** (A) The expression of hsa\_circ0022426 in CRA and CRC patients(X100); (B) The expression of hsa\_circ0101338 in CRA and CRC patients(X100).

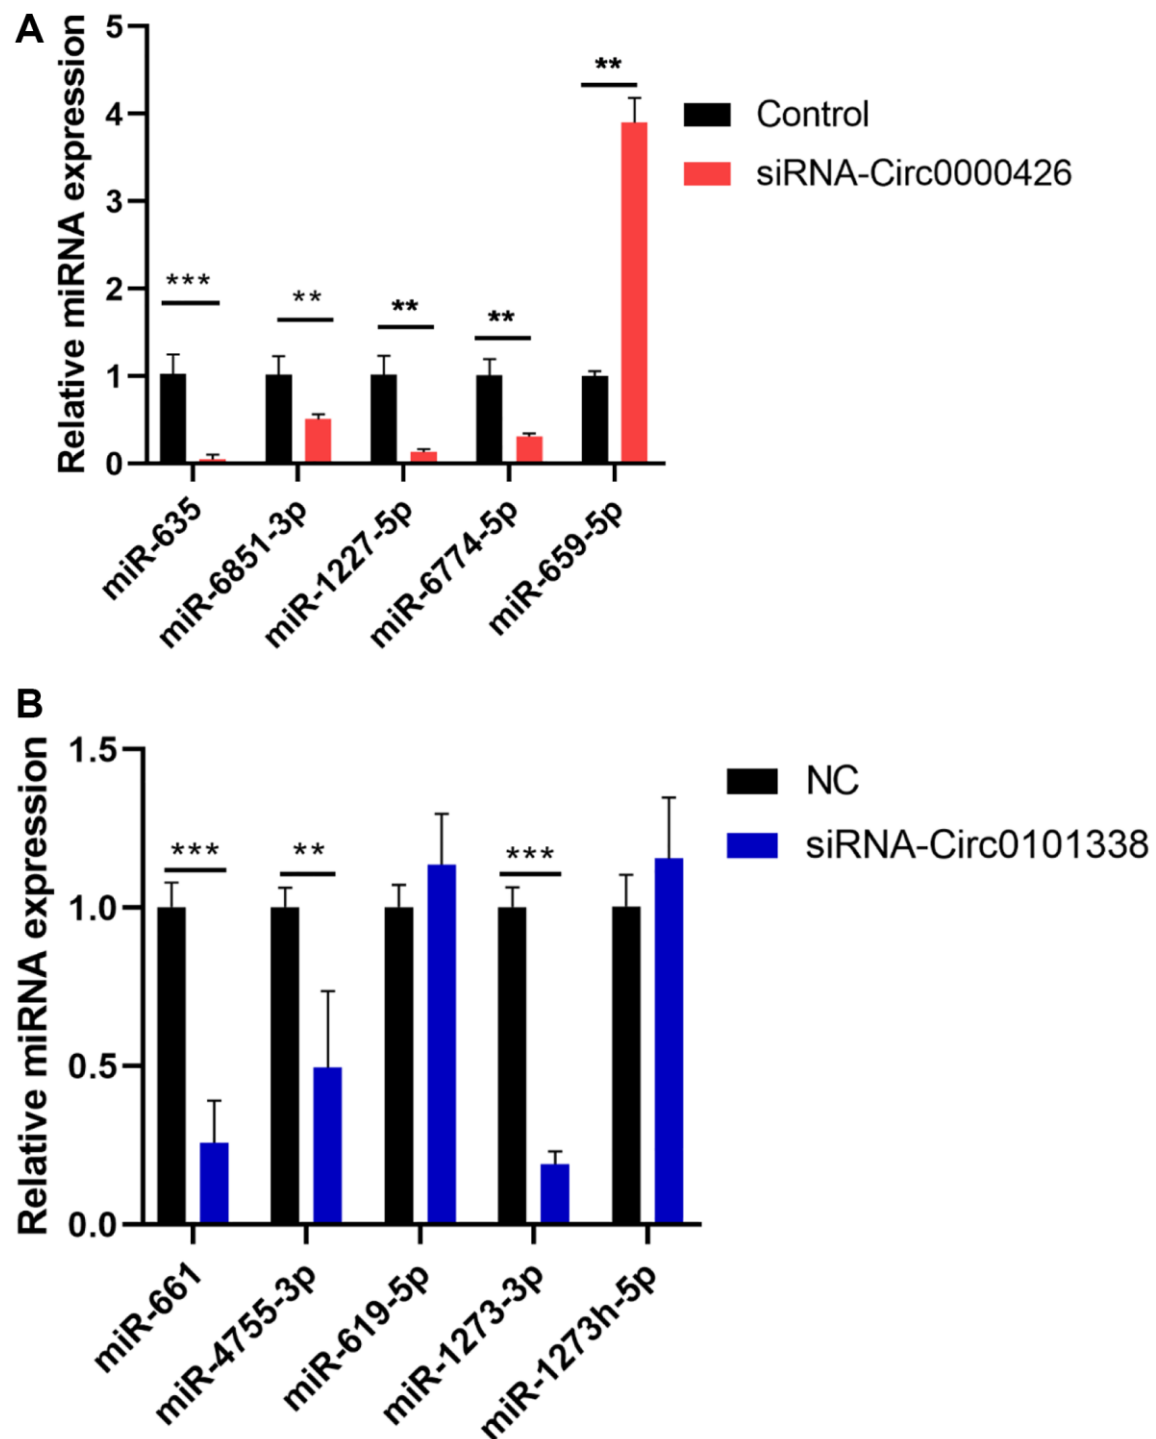

**Supplementary Figure 4. The level of miRNA in HCT 116 after transfection with siRNA.** (A) The expression of miRNA after transfection with hsa\_circ0022426; (B) The expression of miRNA after transfection with hsa\_circ0101338.
